# Supplementary material for: 4q-D4Z4 chromatin architecture regulates the transcription of muscle atrophic genes in facioscapulohumeral muscular dystrophy
Source: HighWire-hosted journal article supplement (doi:10.1101/gr.233288.117), 2019-05-16
Supplement: Supplemental_Table_S2_JD.xlsx [file Supplemental_Table_S2_JD.xlsx]

## Sheet: legend
Supplemental Table S2. 4C-seq interactions analysis
Sheet 1	Summary of D4Z4 interactions retreived in 4C-seq
Sheet 2	Common and lost 4q-D4Z4 interactions in FSHD1
Sheet 3	Interactions of 4qA and 4qB alleles in CN and FSHD1
Sheet 4	4qB vs 4qA lost interactions
Sheet 5	Common and lost 10q-D4Z4 interactions in FSHD1
Sheet 6	Specific and common interactions between 4q and 10q in CN and FSHD1
Sheet 7	4q-D4Z4 vs 10q-D4Z4 lost interactions in FSHD1
Sheet 8	FBXO32 near bait interactions retreived in 4C-seq

## Sheet: D4Z4 Interactions summary
D4Z4 interactions summary
Category of interactions	Interactions (n)	trans Interactions (n)
CN 4q-D4Z4 interactions	244	181
FSHD1 4q-D4Z4 interactions	258	175
CN-FSHD1 common 4q-D4Z4 interactions	158	89
FSHD1 lost 4q-D4Z4 interactions	116	101
Interactions of 4qA and 4qB alleles in CN
4qA-D4Z4 interactions	411	365
4qB-D4Z4 interactions	425	369
4q-D4Z4 interactions specific for the 4qA allele	129	119
4q-D4Z4 interactions common between 4qA and 4qB alleles	335	280
4q-D4Z4 interactions specific for the 4qB allele	127	116
Interactions of 4qA and 4qB alleles in FSHD1
4qA-D4Z4 interactions	392	350
4qB-D4Z4 interactions	372	318
4q-D4Z4 interactions specific for the 4qA allele	121	107
4q-D4Z4 interactions common between 4qA and 4qB alleles	316	283
4q-D4Z4 interactions specific for the 4qB allele	128	119
FSHD1 lost interactions of 4q-D4Z4 4qB vs 4qA alleles
4q-D4Z4 interactions lost by the 4qA allele	241	219
4q-D4Z4 interactions lost by the 4qB allele	229	209
4q-D4Z4 interactions lost by both 4qA and 4qB alleles	164	150
4q-D4Z4 interactions specifically lost by the 4qA allele	77	70
4q-D4Z4 interactions specifically lost by the 4qB allele	65	59
CN 10q-D4Z4 interactions	196	110
FSHD1 10q-D4Z4 interactions	222	136
CN-FSHD1 common 10q-D4Z4 interactions	97	44
FSHD1 lost 10q-D4Z4 interactions	109	71
Interactions of 4q-D4Z4 and 10q-D4Z4 in CN
Interactions common between 4q-D4Z4 and 10q-D4Z4	100
Interactions specific for the 10q-D4Z4	116
Interactions specific for the 4q-D4Z4	170
Interactions of 4q-D4Z4 and 10q-D4Z4 in FSHD1
Interactions common between 4q-D4Z4 and 10q-D4Z4	179
Interactions specific for the 10q-D4Z4	79
Interactions specific for the 4q-D4Z4	151
FSHD1 lost interactions of 4q-D4Z4 vs 10q-D4Z4
Interactions lost by 4q-D4Z4	116
Interactions lost by10q-D4Z4	109
Interactions lost by both 4q-D4Z4 and 10q-D4Z4	14
Interactions specifically lost by the 10q-D4Z4	95
Interactions specifically lost by the 4q-D4Z4	103

## Sheet: 4q common and lost interactions
CN-FSHD1 common 4q-D4Z4 interactions				FSHD1 lost 4q-D4Z4 interactions
Chr	Start	End		Chr	Start	End
chr1	39179	2983953		chr1	10037096	10104558
chr1	4054661	7037096		chr1	16037096	17554661
chr1	13037096	15287096		chr1	39761566	40054661
chr1	19037096	19054661		chr1	88037096	90287096
chr1	214037096	215554661		chr1	141304661	142787096
chr1	232804661	236604558		chr1	171287096	172054661
chr1	239537096	240304661		chr1	217787096	221554661
chr1	241787096	244787096		chr10	7256838	9425559
chr1	244854558	249250621		chr10	53006838	53756838
chr10	84979	2428696		chr10	76213917	76256838
chr10	108224672	108486284		chr10	84199246	84685179
chr10	113618367	114120552		chr10	86987781	87755201
chr10	115112608	115632986		chr10	127755382	127782642
chr10	119452243	119460935		chr11	59287653	59375981
chr10	122120950	122634192		chr11	70537653	72764737
chr10	122634682	122658296		chr11	114787653	116287653
chr10	125426833	125845750		chr12	69936875	72186875
chr10	127210211	127534670		chr12	92436875	93912185
chr10	129886393	130225806		chr12	101436875	102162185
chr10	130369625	130632824		chr12	102912185	103095346
chr10	131982671	132338660		chr12	107691353	108186875
chr10	132457041	132908206		chr13	25623156	27205006
chr10	133053566	133132147		chr13	36205006	37093864
chr10	133205007	133265575		chr13	113899672	114343864
chr10	134352084	134825555		chr14	19064497	24520857
chr10	134952002	135340078		chr14	59709770	60520857
chr10	135479578	135534747		chr14	71709770	72459770
chr11	113287653	114764737		chr14	84377377	84520857
chr11	130537653	131287653		chr14	100127377	100270857
chr11	132014737	132037653		chr15	51410644	52371850
chr11	133514737	135006516		chr15	68061242	69114903
chr12	71454	5230665		chr15	80061242	82311242
chr12	111936875	112662185		chr15	90410644	92121850
chr12	115686875	117186875		chr15	92811242	95061242
chr12	124941353	126345346		chr15	96410644	97614903
chr12	130686875	130845346		chr17	46744	6769916
chr12	131436875	132345346		chr17	13901132	14061239
chr12	132936875	133851895		chr17	69835298	71811239
chr13	97623156	97705006		chr17	73585298	75408330
chr13	108205006	108955006		chr17	79908330	81195210
chr14	79127377	79209770		chr18	44786	10867378
chr14	79877377	80020857		chr18	27956082	29459031
chr14	81377377	81459770		chr18	33893019	33956082
chr14	94209770	94959770		chr18	70643019	71456082
chr14	97209770	99377377		chr19	66103	8174397
chr15	95660644	95811242		chr19	35147424	36674397
chr15	100910644	102531392		chr2	4439074	6051565
chr2	15303	2892008		chr2	6999851	9051565
chr2	113205032	115551565		chr2	21689074	22439074
chr2	221939074	222705032		chr2	35205032	35301565
chr2	229749851	231689074		chr2	35955032	36801565
chr2	234705032	236189074		chr2	90999851	93689074
chr2	236205032	237051565		chr2	194955032	195801565
chr2	242939074	243199373		chr2	208455032	209955032
chr21	9466314	17061646		chr2	212955032	213051565
chr3	63689	3852359		chr2	213249851	215301565
chr3	6852359	8352359		chr20	119107	6418509
chr3	193562213	194352359		chr22	16058515	24671984
chr4	17362748	17612748		chr22	29171984	29277708
chr4	24362748	24612748		chr22	36957440	37421984
chr4	104362748	104612748		chr3	6102359	6139503
chr4	114862748	115362748		chr3	27665257	29165257
chr4	119112748	119612748		chr3	53352359	54852359
chr4	121612748	121862748		chr3	168812213	169602359
chr4	125612748	125862748		chr3	178562213	179352359
chr4	130862748	131112748		chr3	180062213	181602359
chr4	132362748	134362748		chr3	191915257	192852359
chr4	134862748	135362748		chr4	8112748	8862748
chr4	138362748	138862748		chr4	10612748	10862748
chr4	139362748	139612748		chr4	14862748	15112748
chr4	140112748	150002541		chr4	15612748	16362748
chr4	150470089	153487403		chr4	29112748	29362748
chr4	153903916	174467284		chr4	53862748	54112748
chr4	174633734	175922792		chr4	69112748	69362748
chr4	176162002	177619187		chr4	75612748	75862748
chr4	177784775	178797982		chr4	91612748	92112748
chr4	179054215	180150515		chr4	93112748	93862748
chr4	180395002	180788020		chr4	122612748	122862748
chr4	181016342	181163393		chr4	129362748	129862748
chr4	181450368	181656038		chr4	137612748	137862748
chr4	181790606	182998165		chr4	189218902	189218913
chr4	183164485	183540227		chr4	190697504	190700948
chr4	183800095	183952042		chr5	17394894	19269547
chr4	184101980	185554624		chr5	33786679	35769547
chr4	185720498	186160377		chr5	132786679	132894894
chr4	186182656	186205615		chr5	140019547	142849744
chr4	186317908	186325973		chr5	158769547	161599744
chr4	186466874	187947377		chr6	72793333	72813046
chr4	187966486	187977486		chr6	73543333	74313046
chr4	187993896	187999302		chr6	75043333	75063046
chr4	188011312	188682485		chr6	105793333	106563046
chr4	188722658	188727658		chr6	120793333	121563046
chr4	188772470	188777411		chr6	129813046	131313046
chr4	188792223	188797141		chr6	140293333	141063046
chr4	188815365	189113467		chr6	148543333	149313046
chr4	189146033	189151548		chr7	93135241	93422982
chr4	189270618	189282157		chr7	98476158	100172982
chr4	189379637	189385269		chr7	125761820	127172982
chr4	189428442	189732792		chr8	19684013	19851875
chr4	189748630	189753297		chr8	86601875	87351875
chr4	189794886	189803981		chr8	88684013	88851875
chr4	189813612	190028090		chr8	98601875	99351875
chr4	190070377	190078863		chr8	123351875	124874010
chr4	190100106	190117127		chr9	20218708	20883808
chr4	190134153	190138406		chr9	25383808	26038858
chr4	190206000	190210160		chr9	67288858	70886737
chr4	190226083	190396797		chr9	86968708	89133808
chr4	190421450	190425150		chr9	118288858	119133808
chr4	190454651	190483975		chr9	126538858	126633808
chr4	190494951	190505915		chrX	8466798	10669443
chr4	190571285	190592763		chrX	15216798	16267985
chr4	190614041	190617561		chrX	17182823	17767985
chr4	190624600	190628104		chrX	119017985	120919443
chr4	190635111	190638600		chrX	125466798	126169443
chr4	190645578	190649056		chrX	135517985	136432823
chr4	190656009	190666409		chrX	137017985	137419443
chr4	190707838	190711278
chr4	190725027	190728457
chr4	190762654	190769457
chr4	190786421	190789802
chr4	190810048	190813414
chr4	190820146	190823510
chr4	190847075	190857213
chr4	190863985	190901834
chr4	190908843	190912388
chr4	190919479	190930266
chr4	190937510	190952239
chr5	133536679	134394894
chr5	154644894	155394894
chr5	164599744	165036679
chr5	168519547	170394894
chr5	172536679	172644894
chr5	174036679	174349744
chr5	177144894	180786679
chr6	119702	4563046
chr6	153043333	153063046
chr6	153793333	154563046
chr6	155293333	155313046
chr6	158452660	159063046
chr6	159782002	160563046
chr6	161293333	162043333
chr6	165043333	165813046
chr6	167282002	169563046
chr6	169702660	171115067
chr7	16058	4172982
chr7	141976158	142635241
chr7	149011820	149385241
chr7	152011820	157172982
chr7	158610239	159009017
chr8	46948	3602912
chr8	106851875	106874010
chr8	120351875	121101875
chr8	127684013	129374010
chr8	136101875	136352912
chr8	139874010	141351875
chr8	141934013	142352912
chr9	124288858	125218708
chrX	2737197	7267985

## Sheet: 4q alleles interactions
Interactions of 4qA and 4qB alleles in CN					Interactions of 4qA and 4qB alleles in FSHD1
Chr	Start	End	Annotation		Chr	Start	End	Annotation
chr1	40713652	42035778	4q-D4Z4 interactions specific for the 4qA allele		chr1	30309764	31780871	4q-D4Z4 interactions specific for the 4qA allele
chr1	66035778	67535778	4q-D4Z4 interactions specific for the 4qA allele		chr1	84309764	85780871	4q-D4Z4 interactions specific for the 4qA allele
chr1	75213652	76535778	4q-D4Z4 interactions specific for the 4qA allele		chr1	88059764	89530871	4q-D4Z4 interactions specific for the 4qA allele
chr1	81963652	83463652	4q-D4Z4 interactions specific for the 4qA allele		chr1	118780871	120280871	4q-D4Z4 interactions specific for the 4qA allele
chr1	114963652	117035778	4q-D4Z4 interactions specific for the 4qA allele		chr1	149559764	151030871	4q-D4Z4 interactions specific for the 4qA allele
chr1	150035778	150963652	4q-D4Z4 interactions specific for the 4qA allele		chr1	172059764	174280871	4q-D4Z4 interactions specific for the 4qA allele
chr1	159963652	161285778	4q-D4Z4 interactions specific for the 4qA allele		chr1	198309764	199780871	4q-D4Z4 interactions specific for the 4qA allele
chr1	164463652	165785778	4q-D4Z4 interactions specific for the 4qA allele		chr1	205059764	206530871	4q-D4Z4 interactions specific for the 4qA allele
chr1	177963652	179285778	4q-D4Z4 interactions specific for the 4qA allele		chr10	7399868	8864112	4q-D4Z4 interactions specific for the 4qA allele
chr1	205535778	207213652	4q-D4Z4 interactions specific for the 4qA allele		chr10	33649868	35864112	4q-D4Z4 interactions specific for the 4qA allele
chr1	216963652	221463652	4q-D4Z4 interactions specific for the 4qA allele		chr10	51649868	53899868	4q-D4Z4 interactions specific for the 4qA allele
chr1	223713652	226535778	4q-D4Z4 interactions specific for the 4qA allele		chr10	55399868	56864112	4q-D4Z4 interactions specific for the 4qA allele
chr10	19559024	21059024	4q-D4Z4 interactions specific for the 4qA allele		chr10	102148151	103426679	4q-D4Z4 interactions specific for the 4qA allele
chr10	71776944	72993407	4q-D4Z4 interactions specific for the 4qA allele		chr10	121023854	121303503	4q-D4Z4 interactions specific for the 4qA allele
chr10	82096373	82773281	4q-D4Z4 interactions specific for the 4qA allele		chr10	121428021	121750689	4q-D4Z4 interactions specific for the 4qA allele
chr10	101732822	102143195	4q-D4Z4 interactions specific for the 4qA allele		chr11	39040225	40406462	4q-D4Z4 interactions specific for the 4qA allele
chr10	112315127	112551518	4q-D4Z4 interactions specific for the 4qA allele		chr11	64540225	66656462	4q-D4Z4 interactions specific for the 4qA allele
chr10	119370574	119754150	4q-D4Z4 interactions specific for the 4qA allele		chr11	76540225	77906462	4q-D4Z4 interactions specific for the 4qA allele
chr10	131202804	131333636	4q-D4Z4 interactions specific for the 4qA allele		chr11	81790225	83156462	4q-D4Z4 interactions specific for the 4qA allele
chr11	5169999	7273178	4q-D4Z4 interactions specific for the 4qA allele		chr11	87790225	89156462	4q-D4Z4 interactions specific for the 4qA allele
chr11	17023178	18523178	4q-D4Z4 interactions specific for the 4qA allele		chr11	93790225	95906462	4q-D4Z4 interactions specific for the 4qA allele
chr11	32023178	32919999	4q-D4Z4 interactions specific for the 4qA allele		chr12	6990898	8241355	4q-D4Z4 interactions specific for the 4qA allele
chr11	50919999	52273178	4q-D4Z4 interactions specific for the 4qA allele		chr12	12990898	15240898	4q-D4Z4 interactions specific for the 4qA allele
chr11	76419999	77773178	4q-D4Z4 interactions specific for the 4qA allele		chr12	23490898	24741355	4q-D4Z4 interactions specific for the 4qA allele
chr11	89773178	92773178	4q-D4Z4 interactions specific for the 4qA allele		chr12	55740898	56991355	4q-D4Z4 interactions specific for the 4qA allele
chr11	118419999	119919999	4q-D4Z4 interactions specific for the 4qA allele		chr12	104241355	105990898	4q-D4Z4 interactions specific for the 4qA allele
chr11	120669999	122773178	4q-D4Z4 interactions specific for the 4qA allele		chr13	39423573	40622127	4q-D4Z4 interactions specific for the 4qA allele
chr12	71454	3868772	4q-D4Z4 interactions specific for the 4qA allele		chr13	42423573	45872127	4q-D4Z4 interactions specific for the 4qA allele
chr12	9129574	10220113	4q-D4Z4 interactions specific for the 4qA allele		chr13	48122127	49173573	4q-D4Z4 interactions specific for the 4qA allele
chr12	53720113	55220113	4q-D4Z4 interactions specific for the 4qA allele		chr13	70622127	71673573	4q-D4Z4 interactions specific for the 4qA allele
chr12	55629574	57129574	4q-D4Z4 interactions specific for the 4qA allele		chr13	93122127	94173573	4q-D4Z4 interactions specific for the 4qA allele
chr13	19079425	24318829	4q-D4Z4 interactions specific for the 4qA allele		chr15	20002035	29445488	4q-D4Z4 interactions specific for the 4qA allele
chr13	73517241	74949127	4q-D4Z4 interactions specific for the 4qA allele		chr15	68445488	69634212	4q-D4Z4 interactions specific for the 4qA allele
chr13	76517241	78699127	4q-D4Z4 interactions specific for the 4qA allele		chr16	17820600	19043558	4q-D4Z4 interactions specific for the 4qA allele
chr13	79517241	80949127	4q-D4Z4 interactions specific for the 4qA allele		chr16	29820600	31793558	4q-D4Z4 interactions specific for the 4qA allele
chr13	98267241	99699127	4q-D4Z4 interactions specific for the 4qA allele		chr16	46320600	47543558	4q-D4Z4 interactions specific for the 4qA allele
chr14	19064497	22622885	4q-D4Z4 interactions specific for the 4qA allele		chr16	56543558	58793558	4q-D4Z4 interactions specific for the 4qA allele
chr14	48660764	50093691	4q-D4Z4 interactions specific for the 4qA allele		chr16	80820600	82043558	4q-D4Z4 interactions specific for the 4qA allele
chr14	65160764	66593691	4q-D4Z4 interactions specific for the 4qA allele		chr16	85320600	87570600	4q-D4Z4 interactions specific for the 4qA allele
chr14	74910764	77093691	4q-D4Z4 interactions specific for the 4qA allele		chr17	21214395	23408111	4q-D4Z4 interactions specific for the 4qA allele
chr14	86093691	89843691	4q-D4Z4 interactions specific for the 4qA allele		chr17	36964395	39158111	4q-D4Z4 interactions specific for the 4qA allele
chr15	67866558	70111214	4q-D4Z4 interactions specific for the 4qA allele		chr17	50464395	51908111	4q-D4Z4 interactions specific for the 4qA allele
chr15	88116558	90361214	4q-D4Z4 interactions specific for the 4qA allele		chr17	56408111	57908111	4q-D4Z4 interactions specific for the 4qA allele
chr16	17624756	19025603	4q-D4Z4 interactions specific for the 4qA allele		chr17	60964395	63908111	4q-D4Z4 interactions specific for the 4qA allele
chr16	33374756	34775603	4q-D4Z4 interactions specific for the 4qA allele		chr17	71464395	74464395	4q-D4Z4 interactions specific for the 4qA allele
chr16	88874756	90354753	4q-D4Z4 interactions specific for the 4qA allele		chr18	27278844	29528844	4q-D4Z4 interactions specific for the 4qA allele
chr17	20534736	23151495	4q-D4Z4 interactions specific for the 4qA allele		chr18	55778844	57278844	4q-D4Z4 interactions specific for the 4qA allele
chr17	50151495	51284736	4q-D4Z4 interactions specific for the 4qA allele		chr18	61028844	63278844	4q-D4Z4 interactions specific for the 4qA allele
chr17	66284736	68151495	4q-D4Z4 interactions specific for the 4qA allele		chr18	74528844	75656709	4q-D4Z4 interactions specific for the 4qA allele
chr17	80151495	81195210	4q-D4Z4 interactions specific for the 4qA allele		chr2	30160506	31660506	4q-D4Z4 interactions specific for the 4qA allele
chr18	11879889	13003491	4q-D4Z4 interactions specific for the 4qA allele		chr2	57910506	59847982	4q-D4Z4 interactions specific for the 4qA allele
chr18	62879889	64753491	4q-D4Z4 interactions specific for the 4qA allele		chr2	69160506	70347982	4q-D4Z4 interactions specific for the 4qA allele
chr19	5985890	9722039	4q-D4Z4 interactions specific for the 4qA allele		chr2	71410506	72910506	4q-D4Z4 interactions specific for the 4qA allele
chr19	10485890	13472039	4q-D4Z4 interactions specific for the 4qA allele		chr2	82347982	84160506	4q-D4Z4 interactions specific for the 4qA allele
chr19	30735890	32972039	4q-D4Z4 interactions specific for the 4qA allele		chr2	99160506	100347982	4q-D4Z4 interactions specific for the 4qA allele
chr19	35235890	36722039	4q-D4Z4 interactions specific for the 4qA allele		chr2	105160506	107097982	4q-D4Z4 interactions specific for the 4qA allele
chr2	15682184	17835352	4q-D4Z4 interactions specific for the 4qA allele		chr2	113410506	115347982	4q-D4Z4 interactions specific for the 4qA allele
chr2	20182184	23085352	4q-D4Z4 interactions specific for the 4qA allele		chr2	147910506	150160506	4q-D4Z4 interactions specific for the 4qA allele
chr2	38932184	41835352	4q-D4Z4 interactions specific for the 4qA allele		chr2	162160506	164097982	4q-D4Z4 interactions specific for the 4qA allele
chr2	44182184	45585352	4q-D4Z4 interactions specific for the 4qA allele		chr2	170410506	172660506	4q-D4Z4 interactions specific for the 4qA allele
chr2	85432184	86835352	4q-D4Z4 interactions specific for the 4qA allele		chr2	180160506	181347982	4q-D4Z4 interactions specific for the 4qA allele
chr2	116182184	118335352	4q-D4Z4 interactions specific for the 4qA allele		chr2	210597982	212410506	4q-D4Z4 interactions specific for the 4qA allele
chr2	147682184	149182184	4q-D4Z4 interactions specific for the 4qA allele		chr2	213160506	214347982	4q-D4Z4 interactions specific for the 4qA allele
chr2	168682184	170085352	4q-D4Z4 interactions specific for the 4qA allele		chr20	22574156	23916924	4q-D4Z4 interactions specific for the 4qA allele
chr2	216682184	218085352	4q-D4Z4 interactions specific for the 4qA allele		chr20	33074156	35166924	4q-D4Z4 interactions specific for the 4qA allele
chr2	239932184	242055866	4q-D4Z4 interactions specific for the 4qA allele		chr20	45666924	47324156	4q-D4Z4 interactions specific for the 4qA allele
chr20	14911093	16210505	4q-D4Z4 interactions specific for the 4qA allele		chr22	34962047	36354175	4q-D4Z4 interactions specific for the 4qA allele
chr20	19411093	21460505	4q-D4Z4 interactions specific for the 4qA allele		chr3	31149169	32455368	4q-D4Z4 interactions specific for the 4qA allele
chr20	34411093	35710505	4q-D4Z4 interactions specific for the 4qA allele		chr3	90205368	91149169	4q-D4Z4 interactions specific for the 4qA allele
chr21	30507383	31964420	4q-D4Z4 interactions specific for the 4qA allele		chr3	128649169	130149169	4q-D4Z4 interactions specific for the 4qA allele
chr21	32757383	34964420	4q-D4Z4 interactions specific for the 4qA allele		chr3	157705368	160705368	4q-D4Z4 interactions specific for the 4qA allele
chr21	36507383	39464420	4q-D4Z4 interactions specific for the 4qA allele		chr3	174399169	176455368	4q-D4Z4 interactions specific for the 4qA allele
chr22	20962047	22241405	4q-D4Z4 interactions specific for the 4qA allele		chr4	21867783	23117783	4q-D4Z4 interactions specific for the 4qA allele
chr22	23212047	24712047	4q-D4Z4 interactions specific for the 4qA allele		chr4	25867783	26117783	4q-D4Z4 interactions specific for the 4qA allele
chr22	26741405	28462047	4q-D4Z4 interactions specific for the 4qA allele		chr4	27117783	27367783	4q-D4Z4 interactions specific for the 4qA allele
chr22	41212047	42491405	4q-D4Z4 interactions specific for the 4qA allele		chr4	40867783	42117783	4q-D4Z4 interactions specific for the 4qA allele
chr3	34546030	36738382	4q-D4Z4 interactions specific for the 4qA allele		chr4	46617783	46867783	4q-D4Z4 interactions specific for the 4qA allele
chr3	38296030	39738382	4q-D4Z4 interactions specific for the 4qA allele		chr4	47367783	47867783	4q-D4Z4 interactions specific for the 4qA allele
chr3	44296030	45796030	4q-D4Z4 interactions specific for the 4qA allele		chr4	57617783	58117783	4q-D4Z4 interactions specific for the 4qA allele
chr3	46546030	48738382	4q-D4Z4 interactions specific for the 4qA allele		chr4	67867783	68617783	4q-D4Z4 interactions specific for the 4qA allele
chr3	95296030	96738382	4q-D4Z4 interactions specific for the 4qA allele		chr4	82367783	83117783	4q-D4Z4 interactions specific for the 4qA allele
chr3	109546030	110988382	4q-D4Z4 interactions specific for the 4qA allele		chr4	84367783	85117783	4q-D4Z4 interactions specific for the 4qA allele
chr3	121546030	122988382	4q-D4Z4 interactions specific for the 4qA allele		chr4	91617783	92617783	4q-D4Z4 interactions specific for the 4qA allele
chr3	129796030	131238382	4q-D4Z4 interactions specific for the 4qA allele		chr4	94617783	94867783	4q-D4Z4 interactions specific for the 4qA allele
chr3	136546030	137988382	4q-D4Z4 interactions specific for the 4qA allele		chr4	190810451	190823281	4q-D4Z4 interactions specific for the 4qA allele
chr3	153738382	155296030	4q-D4Z4 interactions specific for the 4qA allele		chr4	190842438	190956711	4q-D4Z4 interactions specific for the 4qA allele
chr3	165046030	167238382	4q-D4Z4 interactions specific for the 4qA allele		chr5	5588849	6729587	4q-D4Z4 interactions specific for the 4qA allele
chr3	173296030	174738382	4q-D4Z4 interactions specific for the 4qA allele		chr5	7838849	8979587	4q-D4Z4 interactions specific for the 4qA allele
chr4	33479	1151886	4q-D4Z4 interactions specific for the 4qA allele		chr5	16479587	18338849	4q-D4Z4 interactions specific for the 4qA allele
chr4	27401886	27901886	4q-D4Z4 interactions specific for the 4qA allele		chr5	32588849	34088849	4q-D4Z4 interactions specific for the 4qA allele
chr4	31401886	31651886	4q-D4Z4 interactions specific for the 4qA allele		chr5	55088849	56588849	4q-D4Z4 interactions specific for the 4qA allele
chr4	37901886	38151886	4q-D4Z4 interactions specific for the 4qA allele		chr5	70088849	71229587	4q-D4Z4 interactions specific for the 4qA allele
chr4	44401886	44651886	4q-D4Z4 interactions specific for the 4qA allele		chr5	110588849	112479587	4q-D4Z4 interactions specific for the 4qA allele
chr4	59151886	59401886	4q-D4Z4 interactions specific for the 4qA allele		chr5	116588849	118088849	4q-D4Z4 interactions specific for the 4qA allele
chr4	65901886	66901886	4q-D4Z4 interactions specific for the 4qA allele		chr5	119229587	120338849	4q-D4Z4 interactions specific for the 4qA allele
chr4	68151886	68401886	4q-D4Z4 interactions specific for the 4qA allele		chr5	142479587	143979587	4q-D4Z4 interactions specific for the 4qA allele
chr4	190720798	190799711	4q-D4Z4 interactions specific for the 4qA allele		chr6	30273147	32485296	4q-D4Z4 interactions specific for the 4qA allele
chr4	190823785	190841776	4q-D4Z4 interactions specific for the 4qA allele		chr6	49023147	51235296	4q-D4Z4 interactions specific for the 4qA allele
chr5	9210319	11040134	4q-D4Z4 interactions specific for the 4qA allele		chr6	67773147	69985296	4q-D4Z4 interactions specific for the 4qA allele
chr5	18540134	19710319	4q-D4Z4 interactions specific for the 4qA allele		chr7	16058	3912426	4q-D4Z4 interactions specific for the 4qA allele
chr5	41460319	43290134	4q-D4Z4 interactions specific for the 4qA allele		chr7	85845555	87345555	4q-D4Z4 interactions specific for the 4qA allele
chr5	50040134	51960319	4q-D4Z4 interactions specific for the 4qA allele		chr7	90464242	91845555	4q-D4Z4 interactions specific for the 4qA allele
chr5	114540134	116040134	4q-D4Z4 interactions specific for the 4qA allele		chr7	100214242	101595555	4q-D4Z4 interactions specific for the 4qA allele
chr5	153210319	157290134	4q-D4Z4 interactions specific for the 4qA allele		chr8	26755578	28832533	4q-D4Z4 interactions specific for the 4qA allele
chr6	5140581	6471690	4q-D4Z4 interactions specific for the 4qA allele		chr8	61255578	62582533	4q-D4Z4 interactions specific for the 4qA allele
chr6	17140581	18471690	4q-D4Z4 interactions specific for the 4qA allele		chr8	62755578	64082533	4q-D4Z4 interactions specific for the 4qA allele
chr6	41140581	43221690	4q-D4Z4 interactions specific for the 4qA allele		chr8	75505578	77582533	4q-D4Z4 interactions specific for the 4qA allele
chr6	101140581	102471690	4q-D4Z4 interactions specific for the 4qA allele		chr8	89755578	91082533	4q-D4Z4 interactions specific for the 4qA allele
chr6	106390581	107721690	4q-D4Z4 interactions specific for the 4qA allele		chr8	98005578	99332533	4q-D4Z4 interactions specific for the 4qA allele
chr6	109390581	110721690	4q-D4Z4 interactions specific for the 4qA allele		chr8	100255578	102332533	4q-D4Z4 interactions specific for the 4qA allele
chr6	127221690	128721690	4q-D4Z4 interactions specific for the 4qA allele		chr8	108505578	110582533	4q-D4Z4 interactions specific for the 4qA allele
chr7	15209856	17423520	4q-D4Z4 interactions specific for the 4qA allele		chr9	21055560	22093278	4q-D4Z4 interactions specific for the 4qA allele
chr7	17459856	18923520	4q-D4Z4 interactions specific for the 4qA allele		chr9	67555560	69343278	4q-D4Z4 interactions specific for the 4qA allele
chr7	20459856	23423520	4q-D4Z4 interactions specific for the 4qA allele		chrX	8912928	10128413	4q-D4Z4 interactions specific for the 4qA allele
chr7	87959856	89423520	4q-D4Z4 interactions specific for the 4qA allele		chrX	43128413	44912928	4q-D4Z4 interactions specific for the 4qA allele
chr7	125459856	128423520	4q-D4Z4 interactions specific for the 4qA allele		chrX	85128413	86162928	4q-D4Z4 interactions specific for the 4qA allele
chr7	132959856	134423520	4q-D4Z4 interactions specific for the 4qA allele		chrX	100128413	101912928	4q-D4Z4 interactions specific for the 4qA allele
chr7	144209856	147173520	4q-D4Z4 interactions specific for the 4qA allele		chrX	104912928	106128413	4q-D4Z4 interactions specific for the 4qA allele
chr8	31986602	32960480	4q-D4Z4 interactions specific for the 4qA allele		chrX	107912928	109878413	4q-D4Z4 interactions specific for the 4qA allele
chr8	36486602	38210480	4q-D4Z4 interactions specific for the 4qA allele		chrX	148412928	150378413	4q-D4Z4 interactions specific for the 4qA allele
chr8	56210480	59736602	4q-D4Z4 interactions specific for the 4qA allele		chrY	576376	10008224	4q-D4Z4 interactions specific for the 4qA allele
chr8	69486602	70986602	4q-D4Z4 interactions specific for the 4qA allele		chr1	45963652	48963652	4q-D4Z4 interactions specific for the 4qB allele
chr8	115460480	117486602	4q-D4Z4 interactions specific for the 4qA allele		chr1	76535778	77463652	4q-D4Z4 interactions specific for the 4qB allele
chr8	145460480	146364022	4q-D4Z4 interactions specific for the 4qA allele		chr1	80463652	81963652	4q-D4Z4 interactions specific for the 4qB allele
chr9	10342059	11596460	4q-D4Z4 interactions specific for the 4qA allele		chr1	94713652	96035778	4q-D4Z4 interactions specific for the 4qB allele
chr9	20596460	22846460	4q-D4Z4 interactions specific for the 4qA allele		chr1	98285778	99785778	4q-D4Z4 interactions specific for the 4qB allele
chr9	137092059	139342059	4q-D4Z4 interactions specific for the 4qA allele		chr1	181713652	183035778	4q-D4Z4 interactions specific for the 4qB allele
chrX	78482374	79889509	4q-D4Z4 interactions specific for the 4qA allele		chr1	189963652	191285778	4q-D4Z4 interactions specific for the 4qB allele
chrX	118982374	121139509	4q-D4Z4 interactions specific for the 4qA allele		chr10	20545850	21809024	4q-D4Z4 interactions specific for the 4qB allele
chr1	34059764	35530871	4q-D4Z4 interactions specific for the 4qB allele		chr10	66673227	67761884	4q-D4Z4 interactions specific for the 4qB allele
chr1	73059764	74530871	4q-D4Z4 interactions specific for the 4qB allele		chr11	11169999	13273178	4q-D4Z4 interactions specific for the 4qB allele
chr1	109809764	111280871	4q-D4Z4 interactions specific for the 4qB allele		chr11	14773178	16273178	4q-D4Z4 interactions specific for the 4qB allele
chr1	112059764	113530871	4q-D4Z4 interactions specific for the 4qB allele		chr11	23919999	25273178	4q-D4Z4 interactions specific for the 4qB allele
chr1	141309764	142780871	4q-D4Z4 interactions specific for the 4qB allele		chr11	27669999	29023178	4q-D4Z4 interactions specific for the 4qB allele
chr1	144309764	146530871	4q-D4Z4 interactions specific for the 4qB allele		chr11	32919999	35773178	4q-D4Z4 interactions specific for the 4qB allele
chr1	193809764	196780871	4q-D4Z4 interactions specific for the 4qB allele		chr11	40419999	41773178	4q-D4Z4 interactions specific for the 4qB allele
chr1	197559764	199780871	4q-D4Z4 interactions specific for the 4qB allele		chr11	119773178	121273178	4q-D4Z4 interactions specific for the 4qB allele
chr1	201309764	202780871	4q-D4Z4 interactions specific for the 4qB allele		chr12	31629574	32720113	4q-D4Z4 interactions specific for the 4qB allele
chr1	221559764	223030871	4q-D4Z4 interactions specific for the 4qB allele		chr12	124629574	126470113	4q-D4Z4 interactions specific for the 4qB allele
chr10	2899868	5864112	4q-D4Z4 interactions specific for the 4qB allele		chr13	27767241	29199127	4q-D4Z4 interactions specific for the 4qB allele
chr10	34399868	35864112	4q-D4Z4 interactions specific for the 4qB allele		chr13	30017241	31517241	4q-D4Z4 interactions specific for the 4qB allele
chr10	41149868	42614112	4q-D4Z4 interactions specific for the 4qB allele		chr13	76449127	78017241	4q-D4Z4 interactions specific for the 4qB allele
chr10	56149868	58364112	4q-D4Z4 interactions specific for the 4qB allele		chr13	79517241	80949127	4q-D4Z4 interactions specific for the 4qB allele
chr10	69614112	71096046	4q-D4Z4 interactions specific for the 4qB allele		chr13	81767241	83199127	4q-D4Z4 interactions specific for the 4qB allele
chr10	83389541	84610273	4q-D4Z4 interactions specific for the 4qB allele		chr13	85517241	86949127	4q-D4Z4 interactions specific for the 4qB allele
chr10	103270504	104024070	4q-D4Z4 interactions specific for the 4qB allele		chr13	87767241	89949127	4q-D4Z4 interactions specific for the 4qB allele
chr10	109506914	109918153	4q-D4Z4 interactions specific for the 4qB allele		chr13	91517241	92949127	4q-D4Z4 interactions specific for the 4qB allele
chr10	110069393	110551329	4q-D4Z4 interactions specific for the 4qB allele		chr13	96017241	98949127	4q-D4Z4 interactions specific for the 4qB allele
chr10	116414320	116997707	4q-D4Z4 interactions specific for the 4qB allele		chr13	99699127	101949127	4q-D4Z4 interactions specific for the 4qB allele
chr10	118330626	118957586	4q-D4Z4 interactions specific for the 4qB allele		chr14	19064497	23093691	4q-D4Z4 interactions specific for the 4qB allele
chr10	120006387	120321912	4q-D4Z4 interactions specific for the 4qB allele		chr14	61410764	64343691	4q-D4Z4 interactions specific for the 4qB allele
chr10	120455275	120663842	4q-D4Z4 interactions specific for the 4qB allele		chr14	66660764	68843691	4q-D4Z4 interactions specific for the 4qB allele
chr10	124123788	124437821	4q-D4Z4 interactions specific for the 4qB allele		chr14	74160764	77093691	4q-D4Z4 interactions specific for the 4qB allele
chr10	133783255	133926745	4q-D4Z4 interactions specific for the 4qB allele		chr15	40116558	41611214	4q-D4Z4 interactions specific for the 4qB allele
chr10	135477787	135534747	4q-D4Z4 interactions specific for the 4qB allele		chr16	9374756	10775603	4q-D4Z4 interactions specific for the 4qB allele
chr11	12656462	14906462	4q-D4Z4 interactions specific for the 4qB allele		chr16	13775603	15275603	4q-D4Z4 interactions specific for the 4qB allele
chr11	48790225	50156462	4q-D4Z4 interactions specific for the 4qB allele		chr16	54374756	55775603	4q-D4Z4 interactions specific for the 4qB allele
chr11	98290225	99656462	4q-D4Z4 interactions specific for the 4qB allele		chr16	61124756	63275603	4q-D4Z4 interactions specific for the 4qB allele
chr11	106406462	107906462	4q-D4Z4 interactions specific for the 4qB allele		chr16	68624756	70775603	4q-D4Z4 interactions specific for the 4qB allele
chr12	15240898	16740898	4q-D4Z4 interactions specific for the 4qB allele		chr16	78374756	79874756	4q-D4Z4 interactions specific for the 4qB allele
chr12	21990898	23991355	4q-D4Z4 interactions specific for the 4qB allele		chr17	46744	2756246	4q-D4Z4 interactions specific for the 4qB allele
chr12	71490898	72741355	4q-D4Z4 interactions specific for the 4qB allele		chr17	9651495	10784736	4q-D4Z4 interactions specific for the 4qB allele
chr12	87741355	89241355	4q-D4Z4 interactions specific for the 4qB allele		chr17	53901495	55034736	4q-D4Z4 interactions specific for the 4qB allele
chr13	26372127	27872127	4q-D4Z4 interactions specific for the 4qB allele		chr17	77151495	79034736	4q-D4Z4 interactions specific for the 4qB allele
chr13	60872127	61923573	4q-D4Z4 interactions specific for the 4qB allele		chr17	80901495	81195210	4q-D4Z4 interactions specific for the 4qB allele
chr13	82173573	83372127	4q-D4Z4 interactions specific for the 4qB allele		chr18	8503491	9629889	4q-D4Z4 interactions specific for the 4qB allele
chr13	90872127	92372127	4q-D4Z4 interactions specific for the 4qB allele		chr18	38879889	40753491	4q-D4Z4 interactions specific for the 4qB allele
chr13	101673573	105872127	4q-D4Z4 interactions specific for the 4qB allele		chr19	31485890	33722039	4q-D4Z4 interactions specific for the 4qB allele
chr14	23235943	24285179	4q-D4Z4 interactions specific for the 4qB allele		chr19	43485890	45722039	4q-D4Z4 interactions specific for the 4qB allele
chr14	35235943	36285179	4q-D4Z4 interactions specific for the 4qB allele		chr2	25432184	27585352	4q-D4Z4 interactions specific for the 4qB allele
chr14	40035179	41535179	4q-D4Z4 interactions specific for the 4qB allele		chr2	33682184	35085352	4q-D4Z4 interactions specific for the 4qB allele
chr14	52785179	54735943	4q-D4Z4 interactions specific for the 4qB allele		chr2	53932184	55335352	4q-D4Z4 interactions specific for the 4qB allele
chr14	102285179	103485943	4q-D4Z4 interactions specific for the 4qB allele		chr2	74835352	76335352	4q-D4Z4 interactions specific for the 4qB allele
chr14	104235943	105735943	4q-D4Z4 interactions specific for the 4qB allele		chr2	91432184	92835352	4q-D4Z4 interactions specific for the 4qB allele
chr16	56543558	58320600	4q-D4Z4 interactions specific for the 4qB allele		chr2	121432184	122835352	4q-D4Z4 interactions specific for the 4qB allele
chr16	62820600	64043558	4q-D4Z4 interactions specific for the 4qB allele		chr2	126682184	128085352	4q-D4Z4 interactions specific for the 4qB allele
chr16	67320600	68543558	4q-D4Z4 interactions specific for the 4qB allele		chr2	130432184	131835352	4q-D4Z4 interactions specific for the 4qB allele
chr16	73793558	75293558	4q-D4Z4 interactions specific for the 4qB allele		chr2	135682184	137835352	4q-D4Z4 interactions specific for the 4qB allele
chr17	28714395	31658111	4q-D4Z4 interactions specific for the 4qB allele		chr2	145432184	146835352	4q-D4Z4 interactions specific for the 4qB allele
chr17	36158111	37714395	4q-D4Z4 interactions specific for the 4qB allele		chr2	164182184	165585352	4q-D4Z4 interactions specific for the 4qB allele
chr18	28406709	29906709	4q-D4Z4 interactions specific for the 4qB allele		chr2	188182184	190335352	4q-D4Z4 interactions specific for the 4qB allele
chr18	32528844	34028844	4q-D4Z4 interactions specific for the 4qB allele		chr2	196335352	197932184	4q-D4Z4 interactions specific for the 4qB allele
chr18	44528844	46028844	4q-D4Z4 interactions specific for the 4qB allele		chr20	10411093	11710505	4q-D4Z4 interactions specific for the 4qB allele
chr18	60278844	61778844	4q-D4Z4 interactions specific for the 4qB allele		chr20	37210505	38911093	4q-D4Z4 interactions specific for the 4qB allele
chr19	16236569	18446366	4q-D4Z4 interactions specific for the 4qB allele		chr20	42661093	43960505	4q-D4Z4 interactions specific for the 4qB allele
chr19	22236569	23696366	4q-D4Z4 interactions specific for the 4qB allele		chr20	50161093	52210505	4q-D4Z4 interactions specific for the 4qB allele
chr19	46986569	49196366	4q-D4Z4 interactions specific for the 4qB allele		chr21	25257383	27464420	4q-D4Z4 interactions specific for the 4qB allele
chr2	41847982	43660506	4q-D4Z4 interactions specific for the 4qB allele		chr21	44757383	46214420	4q-D4Z4 interactions specific for the 4qB allele
chr2	62410506	63910506	4q-D4Z4 interactions specific for the 4qB allele		chr21	47757383	48129895	4q-D4Z4 interactions specific for the 4qB allele
chr2	71097982	72597982	4q-D4Z4 interactions specific for the 4qB allele		chr3	15796030	18738382	4q-D4Z4 interactions specific for the 4qB allele
chr2	128847982	130347982	4q-D4Z4 interactions specific for the 4qB allele		chr3	32988382	34488382	4q-D4Z4 interactions specific for the 4qB allele
chr2	135597982	138597982	4q-D4Z4 interactions specific for the 4qB allele		chr3	40488382	41296030	4q-D4Z4 interactions specific for the 4qB allele
chr2	149847982	151347982	4q-D4Z4 interactions specific for the 4qB allele		chr3	70546030	72738382	4q-D4Z4 interactions specific for the 4qB allele
chr2	155097982	156160506	4q-D4Z4 interactions specific for the 4qB allele		chr3	107296030	108738382	4q-D4Z4 interactions specific for the 4qB allele
chr2	157347982	158410506	4q-D4Z4 interactions specific for the 4qB allele		chr3	197152459	198022430	4q-D4Z4 interactions specific for the 4qB allele
chr2	161410506	163347982	4q-D4Z4 interactions specific for the 4qB allele		chr4	28151886	28901886	4q-D4Z4 interactions specific for the 4qB allele
chr2	165910506	167410506	4q-D4Z4 interactions specific for the 4qB allele		chr4	32151886	32901886	4q-D4Z4 interactions specific for the 4qB allele
chr2	170410506	172347982	4q-D4Z4 interactions specific for the 4qB allele		chr4	56651886	56901886	4q-D4Z4 interactions specific for the 4qB allele
chr2	177160506	179097982	4q-D4Z4 interactions specific for the 4qB allele		chr4	66901886	67151886	4q-D4Z4 interactions specific for the 4qB allele
chr2	183160506	185410506	4q-D4Z4 interactions specific for the 4qB allele		chr4	77151886	80401886	4q-D4Z4 interactions specific for the 4qB allele
chr20	119107	3666924	4q-D4Z4 interactions specific for the 4qB allele		chr4	85401886	85651886	4q-D4Z4 interactions specific for the 4qB allele
chr20	61574156	62916924	4q-D4Z4 interactions specific for the 4qB allele		chr4	87901886	88151886	4q-D4Z4 interactions specific for the 4qB allele
chr21	18867501	20136836	4q-D4Z4 interactions specific for the 4qB allele		chr4	96151886	96651886	4q-D4Z4 interactions specific for the 4qB allele
chr22	19104175	20604175	4q-D4Z4 interactions specific for the 4qB allele		chr4	190829786	190841776	4q-D4Z4 interactions specific for the 4qB allele
chr22	34962047	37962047	4q-D4Z4 interactions specific for the 4qB allele		chr5	26460319	27540134	4q-D4Z4 interactions specific for the 4qB allele
chr3	85899169	87955368	4q-D4Z4 interactions specific for the 4qB allele		chr5	58290134	60210319	4q-D4Z4 interactions specific for the 4qB allele
chr3	156205368	157705368	4q-D4Z4 interactions specific for the 4qB allele		chr5	99960319	101040134	4q-D4Z4 interactions specific for the 4qB allele
chr3	159955368	162955368	4q-D4Z4 interactions specific for the 4qB allele		chr5	101790134	102960319	4q-D4Z4 interactions specific for the 4qB allele
chr4	35117783	35367783	4q-D4Z4 interactions specific for the 4qB allele		chr5	105960319	107040134	4q-D4Z4 interactions specific for the 4qB allele
chr4	42367783	42617783	4q-D4Z4 interactions specific for the 4qB allele		chr5	129210319	130710319	4q-D4Z4 interactions specific for the 4qB allele
chr4	43617783	43867783	4q-D4Z4 interactions specific for the 4qB allele		chr5	131790134	133290134	4q-D4Z4 interactions specific for the 4qB allele
chr4	47367783	47867783	4q-D4Z4 interactions specific for the 4qB allele		chr5	136290134	138210319	4q-D4Z4 interactions specific for the 4qB allele
chr4	56367783	57867783	4q-D4Z4 interactions specific for the 4qB allele		chr5	147540134	149460319	4q-D4Z4 interactions specific for the 4qB allele
chr4	67117783	67367783	4q-D4Z4 interactions specific for the 4qB allele		chr5	156960319	158040134	4q-D4Z4 interactions specific for the 4qB allele
chr4	87367783	88617783	4q-D4Z4 interactions specific for the 4qB allele		chr6	23140581	24471690	4q-D4Z4 interactions specific for the 4qB allele
chr4	90117783	90367783	4q-D4Z4 interactions specific for the 4qB allele		chr6	25971690	27471690	4q-D4Z4 interactions specific for the 4qB allele
chr4	100117783	101617783	4q-D4Z4 interactions specific for the 4qB allele		chr6	38890581	40221690	4q-D4Z4 interactions specific for the 4qB allele
chr4	190810451	190823281	4q-D4Z4 interactions specific for the 4qB allele		chr6	46971690	48471690	4q-D4Z4 interactions specific for the 4qB allele
chr5	6729587	8229587	4q-D4Z4 interactions specific for the 4qB allele		chr6	56890581	58390581	4q-D4Z4 interactions specific for the 4qB allele
chr5	44979587	46838849	4q-D4Z4 interactions specific for the 4qB allele		chr6	65140581	66471690	4q-D4Z4 interactions specific for the 4qB allele
chr5	56229587	57338849	4q-D4Z4 interactions specific for the 4qB allele		chr6	78640581	79971690	4q-D4Z4 interactions specific for the 4qB allele
chr5	102729587	104588849	4q-D4Z4 interactions specific for the 4qB allele		chr6	80890581	82221690	4q-D4Z4 interactions specific for the 4qB allele
chr6	13773147	15985296	4q-D4Z4 interactions specific for the 4qB allele		chr6	89890581	91971690	4q-D4Z4 interactions specific for the 4qB allele
chr6	46023147	47485296	4q-D4Z4 interactions specific for the 4qB allele		chr6	95890581	97390581	4q-D4Z4 interactions specific for the 4qB allele
chr6	55023147	56485296	4q-D4Z4 interactions specific for the 4qB allele		chr6	103390581	104721690	4q-D4Z4 interactions specific for the 4qB allele
chr6	78273147	80485296	4q-D4Z4 interactions specific for the 4qB allele		chr6	112971690	114640581	4q-D4Z4 interactions specific for the 4qB allele
chr6	115023147	117235296	4q-D4Z4 interactions specific for the 4qB allele		chr6	118390581	120471690	4q-D4Z4 interactions specific for the 4qB allele
chr6	134523147	135985296	4q-D4Z4 interactions specific for the 4qB allele		chr6	125140581	126640581	4q-D4Z4 interactions specific for the 4qB allele
chr6	137523147	138985296	4q-D4Z4 interactions specific for the 4qB allele		chr6	131890581	133221690	4q-D4Z4 interactions specific for the 4qB allele
chr7	83714242	85845555	4q-D4Z4 interactions specific for the 4qB allele		chr7	12209856	13673520	4q-D4Z4 interactions specific for the 4qB allele
chr7	103214242	104595555	4q-D4Z4 interactions specific for the 4qB allele		chr7	35459856	36923520	4q-D4Z4 interactions specific for the 4qB allele
chr7	134714242	136095555	4q-D4Z4 interactions specific for the 4qB allele		chr7	39959856	41423520	4q-D4Z4 interactions specific for the 4qB allele
chr7	137595555	139214242	4q-D4Z4 interactions specific for the 4qB allele		chr7	114959856	116423520	4q-D4Z4 interactions specific for the 4qB allele
chr7	140714242	142214242	4q-D4Z4 interactions specific for the 4qB allele		chr7	133709856	135173520	4q-D4Z4 interactions specific for the 4qB allele
chr8	5005578	6332533	4q-D4Z4 interactions specific for the 4qB allele		chr8	41960480	43236602	4q-D4Z4 interactions specific for the 4qB allele
chr8	16255578	20582533	4q-D4Z4 interactions specific for the 4qB allele		chr8	47736602	49236602	4q-D4Z4 interactions specific for the 4qB allele
chr8	24505578	25832533	4q-D4Z4 interactions specific for the 4qB allele		chr8	68736602	69710480	4q-D4Z4 interactions specific for the 4qB allele
chr8	26005578	28082533	4q-D4Z4 interactions specific for the 4qB allele		chr8	105710480	107960480	4q-D4Z4 interactions specific for the 4qB allele
chr8	73255578	74582533	4q-D4Z4 interactions specific for the 4qB allele		chr8	130236602	131210480	4q-D4Z4 interactions specific for the 4qB allele
chr8	106255578	108505578	4q-D4Z4 interactions specific for the 4qB allele		chr9	70342059	71596460	4q-D4Z4 interactions specific for the 4qB allele
chr8	112255578	114332533	4q-D4Z4 interactions specific for the 4qB allele		chr9	83596460	85342059	4q-D4Z4 interactions specific for the 4qB allele
chr8	131005578	133082533	4q-D4Z4 interactions specific for the 4qB allele		chr9	115846460	117592059	4q-D4Z4 interactions specific for the 4qB allele
chr9	75343278	76555560	4q-D4Z4 interactions specific for the 4qB allele		chr9	137596460	138592059	4q-D4Z4 interactions specific for the 4qB allele
chr9	78343278	79555560	4q-D4Z4 interactions specific for the 4qB allele		chrX	5639509	7139509	4q-D4Z4 interactions specific for the 4qB allele
chr9	81343278	82555560	4q-D4Z4 interactions specific for the 4qB allele		chrX	13982374	15389509	4q-D4Z4 interactions specific for the 4qB allele
chr9	85093278	86593278	4q-D4Z4 interactions specific for the 4qB allele		chrX	17732374	19139509	4q-D4Z4 interactions specific for the 4qB allele
chrX	8628413	10412928	4q-D4Z4 interactions specific for the 4qB allele		chrX	90482374	93482374	4q-D4Z4 interactions specific for the 4qB allele
chrX	17912928	19412928	4q-D4Z4 interactions specific for the 4qB allele		chrX	128732374	130889509	4q-D4Z4 interactions specific for the 4qB allele
chrX	38628413	40128413	4q-D4Z4 interactions specific for the 4qB allele		chrX	143732374	145889509	4q-D4Z4 interactions specific for the 4qB allele
chrX	71162928	72378413	4q-D4Z4 interactions specific for the 4qB allele		chr1	39179	3785778	4q-D4Z4 interactions common between 4qA and 4qB alleles
chrX	83912928	85128413	4q-D4Z4 interactions specific for the 4qB allele		chr1	3963652	7030871	4q-D4Z4 interactions common between 4qA and 4qB alleles
chrX	86912928	88878413	4q-D4Z4 interactions specific for the 4qB allele		chr1	10713652	10780871	4q-D4Z4 interactions common between 4qA and 4qB alleles
chrX	124878413	125912928	4q-D4Z4 interactions specific for the 4qB allele		chr1	11530871	13780871	4q-D4Z4 interactions common between 4qA and 4qB alleles
chrX	150662928	152162928	4q-D4Z4 interactions specific for the 4qB allele		chr1	13809764	15213652	4q-D4Z4 interactions common between 4qA and 4qB alleles
chrX	152912928	154878413	4q-D4Z4 interactions specific for the 4qB allele		chr1	16713652	18213652	4q-D4Z4 interactions common between 4qA and 4qB alleles
chrY	18132899	20292300	4q-D4Z4 interactions specific for the 4qB allele		chr1	21213652	23285778	4q-D4Z4 interactions common between 4qA and 4qB alleles
chr1	963652	9785778	4q-D4Z4 interactions common between 4qA and 4qB alleles		chr1	24309764	26285778	4q-D4Z4 interactions common between 4qA and 4qB alleles
chr1	11463652	11530871	4q-D4Z4 interactions common between 4qA and 4qB alleles		chr1	27963652	29463652	4q-D4Z4 interactions common between 4qA and 4qB alleles
chr1	13809764	19535778	4q-D4Z4 interactions common between 4qA and 4qB alleles		chr1	34713652	35530871	4q-D4Z4 interactions common between 4qA and 4qB alleles
chr1	26285778	27213652	4q-D4Z4 interactions common between 4qA and 4qB alleles		chr1	35559764	39035778	4q-D4Z4 interactions common between 4qA and 4qB alleles
chr1	29463652	29530871	4q-D4Z4 interactions common between 4qA and 4qB alleles		chr1	58809764	60280871	4q-D4Z4 interactions common between 4qA and 4qB alleles
chr1	29559764	31535778	4q-D4Z4 interactions common between 4qA and 4qB alleles		chr1	63213652	63280871	4q-D4Z4 interactions common between 4qA and 4qB alleles
chr1	32463652	32530871	4q-D4Z4 interactions common between 4qA and 4qB alleles		chr1	64809764	65285778	4q-D4Z4 interactions common between 4qA and 4qB alleles
chr1	37809764	39785778	4q-D4Z4 interactions common between 4qA and 4qB alleles		chr1	72309764	73713652	4q-D4Z4 interactions common between 4qA and 4qB alleles
chr1	46059764	47285778	4q-D4Z4 interactions common between 4qA and 4qB alleles		chr1	92463652	93785778	4q-D4Z4 interactions common between 4qA and 4qB alleles
chr1	68463652	70030871	4q-D4Z4 interactions common between 4qA and 4qB alleles		chr1	162963652	163030871	4q-D4Z4 interactions common between 4qA and 4qB alleles
chr1	87035778	88030871	4q-D4Z4 interactions common between 4qA and 4qB alleles		chr1	164559764	165213652	4q-D4Z4 interactions common between 4qA and 4qB alleles
chr1	88809764	90280871	4q-D4Z4 interactions common between 4qA and 4qB alleles		chr1	166713652	166780871	4q-D4Z4 interactions common between 4qA and 4qB alleles
chr1	91059764	92463652	4q-D4Z4 interactions common between 4qA and 4qB alleles		chr1	166809764	168785778	4q-D4Z4 interactions common between 4qA and 4qB alleles
chr1	100809764	102280871	4q-D4Z4 interactions common between 4qA and 4qB alleles		chr1	210963652	214713652	4q-D4Z4 interactions common between 4qA and 4qB alleles
chr1	156309764	157535778	4q-D4Z4 interactions common between 4qA and 4qB alleles		chr1	215463652	219035778	4q-D4Z4 interactions common between 4qA and 4qB alleles
chr1	169809764	170285778	4q-D4Z4 interactions common between 4qA and 4qB alleles		chr1	220059764	222035778	4q-D4Z4 interactions common between 4qA and 4qB alleles
chr1	170463652	171785778	4q-D4Z4 interactions common between 4qA and 4qB alleles		chr1	224559764	225785778	4q-D4Z4 interactions common between 4qA and 4qB alleles
chr1	175713652	176530871	4q-D4Z4 interactions common between 4qA and 4qB alleles		chr1	227285778	228963652	4q-D4Z4 interactions common between 4qA and 4qB alleles
chr1	213309764	215285778	4q-D4Z4 interactions common between 4qA and 4qB alleles		chr1	231309764	235809764	4q-D4Z4 interactions common between 4qA and 4qB alleles
chr1	230559764	235030871	4q-D4Z4 interactions common between 4qA and 4qB alleles		chr1	236559764	247907379	4q-D4Z4 interactions common between 4qA and 4qB alleles
chr1	235059764	240213652	4q-D4Z4 interactions common between 4qA and 4qB alleles		chr1	248221654	249250621	4q-D4Z4 interactions common between 4qA and 4qB alleles
chr1	241059764	244030871	4q-D4Z4 interactions common between 4qA and 4qB alleles		chr10	83168	1027122	4q-D4Z4 interactions common between 4qA and 4qB alleles
chr1	245227267	246703306	4q-D4Z4 interactions common between 4qA and 4qB alleles		chr10	4399868	6295850	4q-D4Z4 interactions common between 4qA and 4qB alleles
chr1	247104173	249250621	4q-D4Z4 interactions common between 4qA and 4qB alleles		chr10	12295850	14545850	4q-D4Z4 interactions common between 4qA and 4qB alleles
chr10	83168	1027122	4q-D4Z4 interactions common between 4qA and 4qB alleles		chr10	23545850	24614112	4q-D4Z4 interactions common between 4qA and 4qB alleles
chr10	7795850	9614112	4q-D4Z4 interactions common between 4qA and 4qB alleles		chr10	42295850	44545850	4q-D4Z4 interactions common between 4qA and 4qB alleles
chr10	12059024	13045850	4q-D4Z4 interactions common between 4qA and 4qB alleles		chr10	68651987	69892598	4q-D4Z4 interactions common between 4qA and 4qB alleles
chr10	52045850	53309024	4q-D4Z4 interactions common between 4qA and 4qB alleles		chr10	70506673	71779218	4q-D4Z4 interactions common between 4qA and 4qB alleles
chr10	59532297	61364112	4q-D4Z4 interactions common between 4qA and 4qB alleles		chr10	76882192	78594475	4q-D4Z4 interactions common between 4qA and 4qB alleles
chr10	66649868	66695004	4q-D4Z4 interactions common between 4qA and 4qB alleles		chr10	81659114	82942233	4q-D4Z4 interactions common between 4qA and 4qB alleles
chr10	67360500	68864112	4q-D4Z4 interactions common between 4qA and 4qB alleles		chr10	83465176	84149415	4q-D4Z4 interactions common between 4qA and 4qB alleles
chr10	74040671	74745826	4q-D4Z4 interactions common between 4qA and 4qB alleles		chr10	86631869	87252689	4q-D4Z4 interactions common between 4qA and 4qB alleles
chr10	75796984	77724253	4q-D4Z4 interactions common between 4qA and 4qB alleles		chr10	91392881	93006017	4q-D4Z4 interactions common between 4qA and 4qB alleles
chr10	87089266	87565582	4q-D4Z4 interactions common between 4qA and 4qB alleles		chr10	96478636	97656765	4q-D4Z4 interactions common between 4qA and 4qB alleles
chr10	96637407	96964282	4q-D4Z4 interactions common between 4qA and 4qB alleles		chr10	98469063	99047138	4q-D4Z4 interactions common between 4qA and 4qB alleles
chr10	104340553	104771686	4q-D4Z4 interactions common between 4qA and 4qB alleles		chr10	99225903	99980869	4q-D4Z4 interactions common between 4qA and 4qB alleles
chr10	105788983	106083659	4q-D4Z4 interactions common between 4qA and 4qB alleles		chr10	100549604	101730387	4q-D4Z4 interactions common between 4qA and 4qB alleles
chr10	106684495	107177311	4q-D4Z4 interactions common between 4qA and 4qB alleles		chr10	105594653	107177311	4q-D4Z4 interactions common between 4qA and 4qB alleles
chr10	108361577	109110710	4q-D4Z4 interactions common between 4qA and 4qB alleles		chr10	107325863	108218105	4q-D4Z4 interactions common between 4qA and 4qB alleles
chr10	112986685	113296434	4q-D4Z4 interactions common between 4qA and 4qB alleles		chr10	108361577	109289676	4q-D4Z4 interactions common between 4qA and 4qB alleles
chr10	113650221	114002103	4q-D4Z4 interactions common between 4qA and 4qB alleles		chr10	109372568	110417072	4q-D4Z4 interactions common between 4qA and 4qB alleles
chr10	115185446	115460758	4q-D4Z4 interactions common between 4qA and 4qB alleles		chr10	110882119	111353891	4q-D4Z4 interactions common between 4qA and 4qB alleles
chr10	117697457	117855060	4q-D4Z4 interactions common between 4qA and 4qB alleles		chr10	112162147	112742217	4q-D4Z4 interactions common between 4qA and 4qB alleles
chr10	121936608	122300637	4q-D4Z4 interactions common between 4qA and 4qB alleles		chr10	113575693	114342710	4q-D4Z4 interactions common between 4qA and 4qB alleles
chr10	122319467	122614819	4q-D4Z4 interactions common between 4qA and 4qB alleles		chr10	114603162	115476742	4q-D4Z4 interactions common between 4qA and 4qB alleles
chr10	123270326	123530153	4q-D4Z4 interactions common between 4qA and 4qB alleles		chr10	115776844	116065446	4q-D4Z4 interactions common between 4qA and 4qB alleles
chr10	125551240	125759621	4q-D4Z4 interactions common between 4qA and 4qB alleles		chr10	116363859	116813449	4q-D4Z4 interactions common between 4qA and 4qB alleles
chr10	127247507	127474234	4q-D4Z4 interactions common between 4qA and 4qB alleles		chr10	117560577	117855060	4q-D4Z4 interactions common between 4qA and 4qB alleles
chr10	127919035	128189161	4q-D4Z4 interactions common between 4qA and 4qB alleles		chr10	117886373	118442934	4q-D4Z4 interactions common between 4qA and 4qB alleles
chr10	129917355	130308268	4q-D4Z4 interactions common between 4qA and 4qB alleles		chr10	118703384	118977369	4q-D4Z4 interactions common between 4qA and 4qB alleles
chr10	130446292	130568555	4q-D4Z4 interactions common between 4qA and 4qB alleles		chr10	119370574	119818299	4q-D4Z4 interactions common between 4qA and 4qB alleles
chr10	131906625	132253170	4q-D4Z4 interactions common between 4qA and 4qB alleles		chr10	119877001	120122711	4q-D4Z4 interactions common between 4qA and 4qB alleles
chr10	132287611	132428090	4q-D4Z4 interactions common between 4qA and 4qB alleles		chr10	120131931	120871378	4q-D4Z4 interactions common between 4qA and 4qB alleles
chr10	132495270	132971543	4q-D4Z4 interactions common between 4qA and 4qB alleles		chr10	121961550	122244759	4q-D4Z4 interactions common between 4qA and 4qB alleles
chr10	133008848	133216241	4q-D4Z4 interactions common between 4qA and 4qB alleles		chr10	122245845	122614819	4q-D4Z4 interactions common between 4qA and 4qB alleles
chr10	133216868	133413334	4q-D4Z4 interactions common between 4qA and 4qB alleles		chr10	122887449	123751042	4q-D4Z4 interactions common between 4qA and 4qB alleles
chr10	133413532	133721626	4q-D4Z4 interactions common between 4qA and 4qB alleles		chr10	124403977	124913028	4q-D4Z4 interactions common between 4qA and 4qB alleles
chr10	134317472	135225575	4q-D4Z4 interactions common between 4qA and 4qB alleles		chr10	124922016	125880913	4q-D4Z4 interactions common between 4qA and 4qB alleles
chr11	28419999	29156462	4q-D4Z4 interactions common between 4qA and 4qB alleles		chr10	126447131	126675912	4q-D4Z4 interactions common between 4qA and 4qB alleles
chr11	61540225	62023178	4q-D4Z4 interactions common between 4qA and 4qB alleles		chr10	127019613	127809523	4q-D4Z4 interactions common between 4qA and 4qB alleles
chr11	70419999	71156462	4q-D4Z4 interactions common between 4qA and 4qB alleles		chr10	128244009	128575007	4q-D4Z4 interactions common between 4qA and 4qB alleles
chr11	72040225	73273178	4q-D4Z4 interactions common between 4qA and 4qB alleles		chr10	128701405	128958462	4q-D4Z4 interactions common between 4qA and 4qB alleles
chr11	80169999	80906462	4q-D4Z4 interactions common between 4qA and 4qB alleles		chr10	128968533	129418655	4q-D4Z4 interactions common between 4qA and 4qB alleles
chr11	100540225	101773178	4q-D4Z4 interactions common between 4qA and 4qB alleles		chr10	129589614	130918330	4q-D4Z4 interactions common between 4qA and 4qB alleles
chr11	102523178	104290225	4q-D4Z4 interactions common between 4qA and 4qB alleles		chr10	131003457	131322419	4q-D4Z4 interactions common between 4qA and 4qB alleles
chr11	113156462	114523178	4q-D4Z4 interactions common between 4qA and 4qB alleles		chr10	131712356	133660505	4q-D4Z4 interactions common between 4qA and 4qB alleles
chr11	116169999	116906462	4q-D4Z4 interactions common between 4qA and 4qB alleles		chr10	133771009	134561512	4q-D4Z4 interactions common between 4qA and 4qB alleles
chr11	125169999	126523178	4q-D4Z4 interactions common between 4qA and 4qB alleles		chr10	134572786	135135059	4q-D4Z4 interactions common between 4qA and 4qB alleles
chr11	126790225	128156462	4q-D4Z4 interactions common between 4qA and 4qB alleles		chr11	117064	5722934	4q-D4Z4 interactions common between 4qA and 4qB alleles
chr11	128906462	131156462	4q-D4Z4 interactions common between 4qA and 4qB alleles		chr11	30669999	32156462	4q-D4Z4 interactions common between 4qA and 4qB alleles
chr11	133676525	135006516	4q-D4Z4 interactions common between 4qA and 4qB alleles		chr11	61419999	62156462	4q-D4Z4 interactions common between 4qA and 4qB alleles
chr12	12990898	14241355	4q-D4Z4 interactions common between 4qA and 4qB alleles		chr11	74290225	74919999	4q-D4Z4 interactions common between 4qA and 4qB alleles
chr12	65379574	66879574	4q-D4Z4 interactions common between 4qA and 4qB alleles		chr11	99669999	100406462	4q-D4Z4 interactions common between 4qA and 4qB alleles
chr12	69470113	70970113	4q-D4Z4 interactions common between 4qA and 4qB alleles		chr11	101156462	101773178	4q-D4Z4 interactions common between 4qA and 4qB alleles
chr12	82220113	83379574	4q-D4Z4 interactions common between 4qA and 4qB alleles		chr11	104290225	106273178	4q-D4Z4 interactions common between 4qA and 4qB alleles
chr12	92241355	93741355	4q-D4Z4 interactions common between 4qA and 4qB alleles		chr11	107290225	111040225	4q-D4Z4 interactions common between 4qA and 4qB alleles
chr12	100220113	101991355	4q-D4Z4 interactions common between 4qA and 4qB alleles		chr11	113906462	114523178	4q-D4Z4 interactions common between 4qA and 4qB alleles
chr12	102240898	107991355	4q-D4Z4 interactions common between 4qA and 4qB alleles		chr11	116023178	116156462	4q-D4Z4 interactions common between 4qA and 4qB alleles
chr12	108990898	109629574	4q-D4Z4 interactions common between 4qA and 4qB alleles		chr11	123523178	124406462	4q-D4Z4 interactions common between 4qA and 4qB alleles
chr12	113490898	117741355	4q-D4Z4 interactions common between 4qA and 4qB alleles		chr11	129790225	130273178	4q-D4Z4 interactions common between 4qA and 4qB alleles
chr12	120990898	122241355	4q-D4Z4 interactions common between 4qA and 4qB alleles		chr11	131169999	135006516	4q-D4Z4 interactions common between 4qA and 4qB alleles
chr12	122490898	122720113	4q-D4Z4 interactions common between 4qA and 4qB alleles		chr12	80203	4629574	4q-D4Z4 interactions common between 4qA and 4qB alleles
chr12	123470113	126741355	4q-D4Z4 interactions common between 4qA and 4qB alleles		chr12	51470113	53241355	4q-D4Z4 interactions common between 4qA and 4qB alleles
chr12	129741355	132240898	4q-D4Z4 interactions common between 4qA and 4qB alleles		chr12	75990898	76220113	4q-D4Z4 interactions common between 4qA and 4qB alleles
chr12	133193118	133851895	4q-D4Z4 interactions common between 4qA and 4qB alleles		chr12	93990898	96129574	4q-D4Z4 interactions common between 4qA and 4qB alleles
chr13	36423573	38372127	4q-D4Z4 interactions common between 4qA and 4qB alleles		chr12	99879574	100491355	4q-D4Z4 interactions common between 4qA and 4qB alleles
chr13	70517241	71673573	4q-D4Z4 interactions common between 4qA and 4qB alleles		chr12	107720113	108741355	4q-D4Z4 interactions common between 4qA and 4qB alleles
chr13	93872127	95673573	4q-D4Z4 interactions common between 4qA and 4qB alleles		chr12	109491355	109629574	4q-D4Z4 interactions common between 4qA and 4qB alleles
chr13	96423573	97449127	4q-D4Z4 interactions common between 4qA and 4qB alleles		chr12	109970113	111129574	4q-D4Z4 interactions common between 4qA and 4qB alleles
chr13	107673573	109622127	4q-D4Z4 interactions common between 4qA and 4qB alleles		chr12	111879574	111990898	4q-D4Z4 interactions common between 4qA and 4qB alleles
chr13	111423573	112449127	4q-D4Z4 interactions common between 4qA and 4qB alleles		chr12	113490898	113720113	4q-D4Z4 interactions common between 4qA and 4qB alleles
chr13	113267241	115169878	4q-D4Z4 interactions common between 4qA and 4qB alleles		chr12	114879574	116991355	4q-D4Z4 interactions common between 4qA and 4qB alleles
chr14	61785179	62093691	4q-D4Z4 interactions common between 4qA and 4qB alleles		chr12	118220113	120129574	4q-D4Z4 interactions common between 4qA and 4qB alleles
chr14	67785179	68843691	4q-D4Z4 interactions common between 4qA and 4qB alleles		chr12	127491355	133851895	4q-D4Z4 interactions common between 4qA and 4qB alleles
chr14	70343691	72285179	4q-D4Z4 interactions common between 4qA and 4qB alleles		chr13	19090379	23673573	4q-D4Z4 interactions common between 4qA and 4qB alleles
chr14	77910764	82785179	4q-D4Z4 interactions common between 4qA and 4qB alleles		chr13	32267241	33872127	4q-D4Z4 interactions common between 4qA and 4qB alleles
chr14	83235943	84593691	4q-D4Z4 interactions common between 4qA and 4qB alleles		chr13	52173573	54699127	4q-D4Z4 interactions common between 4qA and 4qB alleles
chr14	94035179	95561543	4q-D4Z4 interactions common between 4qA and 4qB alleles		chr13	104673573	106173573	4q-D4Z4 interactions common between 4qA and 4qB alleles
chr14	95843691	99593691	4q-D4Z4 interactions common between 4qA and 4qB alleles		chr13	107673573	107949127	4q-D4Z4 interactions common between 4qA and 4qB alleles
chr14	100035179	101843691	4q-D4Z4 interactions common between 4qA and 4qB alleles		chr13	108017241	110949127	4q-D4Z4 interactions common between 4qA and 4qB alleles
chr14	106467515	107349540	4q-D4Z4 interactions common between 4qA and 4qB alleles		chr13	111017241	114122127	4q-D4Z4 interactions common between 4qA and 4qB alleles
chr15	30366558	31861214	4q-D4Z4 interactions common between 4qA and 4qB alleles		chr14	52410764	53985943	4q-D4Z4 interactions common between 4qA and 4qB alleles
chr15	50445488	53884212	4q-D4Z4 interactions common between 4qA and 4qB alleles		chr14	71535179	72593691	4q-D4Z4 interactions common between 4qA and 4qB alleles
chr15	60195488	61111214	4q-D4Z4 interactions common between 4qA and 4qB alleles		chr14	79410764	81593691	4q-D4Z4 interactions common between 4qA and 4qB alleles
chr15	63195488	64861214	4q-D4Z4 interactions common between 4qA and 4qB alleles		chr14	84735943	85343691	4q-D4Z4 interactions common between 4qA and 4qB alleles
chr15	72945488	74445488	4q-D4Z4 interactions common between 4qA and 4qB alleles		chr14	89160764	91035179	4q-D4Z4 interactions common between 4qA and 4qB alleles
chr15	79384212	81945488	4q-D4Z4 interactions common between 4qA and 4qB alleles		chr14	91485943	92843691	4q-D4Z4 interactions common between 4qA and 4qB alleles
chr15	85116558	86884212	4q-D4Z4 interactions common between 4qA and 4qB alleles		chr14	92910764	92985943	4q-D4Z4 interactions common between 4qA and 4qB alleles
chr15	91384212	97861214	4q-D4Z4 interactions common between 4qA and 4qB alleles		chr14	93285179	96192204	4q-D4Z4 interactions common between 4qA and 4qB alleles
chr15	98616558	98884212	4q-D4Z4 interactions common between 4qA and 4qB alleles		chr14	96211621	96285179	4q-D4Z4 interactions common between 4qA and 4qB alleles
chr15	101134212	102531392	4q-D4Z4 interactions common between 4qA and 4qB alleles		chr14	98535179	100035179	4q-D4Z4 interactions common between 4qA and 4qB alleles
chr16	70736	4775603	4q-D4Z4 interactions common between 4qA and 4qB alleles		chr14	103785179	104985943	4q-D4Z4 interactions common between 4qA and 4qB alleles
chr16	12293558	13775603	4q-D4Z4 interactions common between 4qA and 4qB alleles		chr14	106035179	107349540	4q-D4Z4 interactions common between 4qA and 4qB alleles
chr16	24374756	25775603	4q-D4Z4 interactions common between 4qA and 4qB alleles		chr15	31116558	32445488	4q-D4Z4 interactions common between 4qA and 4qB alleles
chr16	46124756	47543558	4q-D4Z4 interactions common between 4qA and 4qB alleles		chr15	36195488	37111214	4q-D4Z4 interactions common between 4qA and 4qB alleles
chr16	52874756	54374756	4q-D4Z4 interactions common between 4qA and 4qB alleles		chr15	54634212	55861214	4q-D4Z4 interactions common between 4qA and 4qB alleles
chr16	76793558	77525603	4q-D4Z4 interactions common between 4qA and 4qB alleles		chr15	63366558	65611214	4q-D4Z4 interactions common between 4qA and 4qB alleles
chr16	77624756	77820600	4q-D4Z4 interactions common between 4qA and 4qB alleles		chr15	72945488	73861214	4q-D4Z4 interactions common between 4qA and 4qB alleles
chr16	79043558	80070600	4q-D4Z4 interactions common between 4qA and 4qB alleles		chr15	78945488	80445488	4q-D4Z4 interactions common between 4qA and 4qB alleles
chr16	82793558	84275603	4q-D4Z4 interactions common between 4qA and 4qB alleles		chr15	85116558	87634212	4q-D4Z4 interactions common between 4qA and 4qB alleles
chr17	46744	2756246	4q-D4Z4 interactions common between 4qA and 4qB alleles		chr15	96634212	102531392	4q-D4Z4 interactions common between 4qA and 4qB alleles
chr17	3651495	4769478	4q-D4Z4 interactions common between 4qA and 4qB alleles		chr16	26624756	28775603	4q-D4Z4 interactions common between 4qA and 4qB alleles
chr17	9284736	10658111	4q-D4Z4 interactions common between 4qA and 4qB alleles		chr16	32624756	34320600	4q-D4Z4 interactions common between 4qA and 4qB alleles
chr17	12214395	13784736	4q-D4Z4 interactions common between 4qA and 4qB alleles		chr16	76124756	77543558	4q-D4Z4 interactions common between 4qA and 4qB alleles
chr17	26151495	27651495	4q-D4Z4 interactions common between 4qA and 4qB alleles		chr16	89070600	90354753	4q-D4Z4 interactions common between 4qA and 4qB alleles
chr17	33284736	34658111	4q-D4Z4 interactions common between 4qA and 4qB alleles		chr17	13714395	15908111	4q-D4Z4 interactions common between 4qA and 4qB alleles
chr17	51964395	52784736	4q-D4Z4 interactions common between 4qA and 4qB alleles		chr17	34034736	35901495	4q-D4Z4 interactions common between 4qA and 4qB alleles
chr17	60964395	62408111	4q-D4Z4 interactions common between 4qA and 4qB alleles		chr17	39964395	40401495	4q-D4Z4 interactions common between 4qA and 4qB alleles
chr17	70034736	71408111	4q-D4Z4 interactions common between 4qA and 4qB alleles		chr18	103375	4962196	4q-D4Z4 interactions common between 4qA and 4qB alleles
chr17	73784736	75158111	4q-D4Z4 interactions common between 4qA and 4qB alleles		chr18	20528844	22406709	4q-D4Z4 interactions common between 4qA and 4qB alleles
chr18	103375	4220408	4q-D4Z4 interactions common between 4qA and 4qB alleles		chr18	45629889	46028844	4q-D4Z4 interactions common between 4qA and 4qB alleles
chr18	38528844	39253491	4q-D4Z4 interactions common between 4qA and 4qB alleles		chr18	67003491	68906709	4q-D4Z4 interactions common between 4qA and 4qB alleles
chr18	39629889	39656709	4q-D4Z4 interactions common between 4qA and 4qB alleles		chr19	52986569	53972039	4q-D4Z4 interactions common between 4qA and 4qB alleles
chr18	55379889	56156709	4q-D4Z4 interactions common between 4qA and 4qB alleles		chr19	55236569	56972039	4q-D4Z4 interactions common between 4qA and 4qB alleles
chr18	66656709	67753491	4q-D4Z4 interactions common between 4qA and 4qB alleles		chr19	58236569	59128983	4q-D4Z4 interactions common between 4qA and 4qB alleles
chr18	70778844	73406709	4q-D4Z4 interactions common between 4qA and 4qB alleles		chr2	18056	3585352	4q-D4Z4 interactions common between 4qA and 4qB alleles
chr18	74503491	76003491	4q-D4Z4 interactions common between 4qA and 4qB alleles		chr2	6682184	7660506	4q-D4Z4 interactions common between 4qA and 4qB alleles
chr19	66103	2877975	4q-D4Z4 interactions common between 4qA and 4qB alleles		chr2	12160506	13335352	4q-D4Z4 interactions common between 4qA and 4qB alleles
chr19	26985890	29222039	4q-D4Z4 interactions common between 4qA and 4qB alleles		chr2	14410506	16335352	4q-D4Z4 interactions common between 4qA and 4qB alleles
chr19	38235890	40196366	4q-D4Z4 interactions common between 4qA and 4qB alleles		chr2	17847982	20097982	4q-D4Z4 interactions common between 4qA and 4qB alleles
chr19	44235890	46196366	4q-D4Z4 interactions common between 4qA and 4qB alleles		chr2	42597982	44835352	4q-D4Z4 interactions common between 4qA and 4qB alleles
chr19	55986569	57446366	4q-D4Z4 interactions common between 4qA and 4qB alleles		chr2	51682184	53085352	4q-D4Z4 interactions common between 4qA and 4qB alleles
chr2	18056	2642710	4q-D4Z4 interactions common between 4qA and 4qB alleles		chr2	103432184	104835352	4q-D4Z4 interactions common between 4qA and 4qB alleles
chr2	3597982	5410506	4q-D4Z4 interactions common between 4qA and 4qB alleles		chr2	143410506	144597982	4q-D4Z4 interactions common between 4qA and 4qB alleles
chr2	6910506	9160506	4q-D4Z4 interactions common between 4qA and 4qB alleles		chr2	185182184	186585352	4q-D4Z4 interactions common between 4qA and 4qB alleles
chr2	11932184	13335352	4q-D4Z4 interactions common between 4qA and 4qB alleles		chr2	194410506	195585352	4q-D4Z4 interactions common between 4qA and 4qB alleles
chr2	35182184	37335352	4q-D4Z4 interactions common between 4qA and 4qB alleles		chr2	199432184	201160506	4q-D4Z4 interactions common between 4qA and 4qB alleles
chr2	80182184	81585352	4q-D4Z4 interactions common between 4qA and 4qB alleles		chr2	204160506	206085352	4q-D4Z4 interactions common between 4qA and 4qB alleles
chr2	91432184	93160506	4q-D4Z4 interactions common between 4qA and 4qB alleles		chr2	207597982	209410506	4q-D4Z4 interactions common between 4qA and 4qB alleles
chr2	100335352	101097982	4q-D4Z4 interactions common between 4qA and 4qB alleles		chr2	216910506	218835352	4q-D4Z4 interactions common between 4qA and 4qB alleles
chr2	113182184	116085352	4q-D4Z4 interactions common between 4qA and 4qB alleles		chr2	220660506	224182184	4q-D4Z4 interactions common between 4qA and 4qB alleles
chr2	186910506	188085352	4q-D4Z4 interactions common between 4qA and 4qB alleles		chr2	225910506	227410506	4q-D4Z4 interactions common between 4qA and 4qB alleles
chr2	195160506	197085352	4q-D4Z4 interactions common between 4qA and 4qB alleles		chr2	227847982	231585352	4q-D4Z4 interactions common between 4qA and 4qB alleles
chr2	202660506	203835352	4q-D4Z4 interactions common between 4qA and 4qB alleles		chr2	233932184	235660506	4q-D4Z4 interactions common between 4qA and 4qB alleles
chr2	208347982	209410506	4q-D4Z4 interactions common between 4qA and 4qB alleles		chr2	239847982	241412216	4q-D4Z4 interactions common between 4qA and 4qB alleles
chr2	210910506	212097982	4q-D4Z4 interactions common between 4qA and 4qB alleles		chr2	242097982	243199373	4q-D4Z4 interactions common between 4qA and 4qB alleles
chr2	213160506	215835352	4q-D4Z4 interactions common between 4qA and 4qB alleles		chr20	6074156	8166924	4q-D4Z4 interactions common between 4qA and 4qB alleles
chr2	219910506	223347982	4q-D4Z4 interactions common between 4qA and 4qB alleles		chr20	58960505	59916924	4q-D4Z4 interactions common between 4qA and 4qB alleles
chr2	225597982	233085352	4q-D4Z4 interactions common between 4qA and 4qB alleles		chr21	15507383	16964420	4q-D4Z4 interactions common between 4qA and 4qB alleles
chr2	233932184	236847982	4q-D4Z4 interactions common between 4qA and 4qB alleles		chr22	26962047	28104175	4q-D4Z4 interactions common between 4qA and 4qB alleles
chr2	237910506	239085352	4q-D4Z4 interactions common between 4qA and 4qB alleles		chr22	50212047	51304566	4q-D4Z4 interactions common between 4qA and 4qB alleles
chr2	242097982	243199373	4q-D4Z4 interactions common between 4qA and 4qB alleles		chr3	63689	1528370	4q-D4Z4 interactions common between 4qA and 4qB alleles
chr20	10960505	12661093	4q-D4Z4 interactions common between 4qA and 4qB alleles		chr3	1546030	2455368	4q-D4Z4 interactions common between 4qA and 4qB alleles
chr20	29324156	30460505	4q-D4Z4 interactions common between 4qA and 4qB alleles		chr3	2649169	3955368	4q-D4Z4 interactions common between 4qA and 4qB alleles
chr20	50161093	50166924	4q-D4Z4 interactions common between 4qA and 4qB alleles		chr3	6205368	8988382	4q-D4Z4 interactions common between 4qA and 4qB alleles
chr20	52574156	54074156	4q-D4Z4 interactions common between 4qA and 4qB alleles		chr3	12205368	15205368	4q-D4Z4 interactions common between 4qA and 4qB alleles
chr20	54824156	55960505	4q-D4Z4 interactions common between 4qA and 4qB alleles		chr3	19899169	22546030	4q-D4Z4 interactions common between 4qA and 4qB alleles
chr21	9466395	17136836	4q-D4Z4 interactions common between 4qA and 4qB alleles		chr3	25899169	26988382	4q-D4Z4 interactions common between 4qA and 4qB alleles
chr21	25617501	27464420	4q-D4Z4 interactions common between 4qA and 4qB alleles		chr3	27046030	27955368	4q-D4Z4 interactions common between 4qA and 4qB alleles
chr22	29212047	31212047	4q-D4Z4 interactions common between 4qA and 4qB alleles		chr3	29296030	30205368	4q-D4Z4 interactions common between 4qA and 4qB alleles
chr22	32212047	33462047	4q-D4Z4 interactions common between 4qA and 4qB alleles		chr3	43899169	44238382	4q-D4Z4 interactions common between 4qA and 4qB alleles
chr22	48354175	48491405	4q-D4Z4 interactions common between 4qA and 4qB alleles		chr3	46488382	47988382	4q-D4Z4 interactions common between 4qA and 4qB alleles
chr3	63689	5455368	4q-D4Z4 interactions common between 4qA and 4qB alleles		chr3	52546030	52899169	4q-D4Z4 interactions common between 4qA and 4qB alleles
chr3	6399169	8649169	4q-D4Z4 interactions common between 4qA and 4qB alleles		chr3	57046030	57205368	4q-D4Z4 interactions common between 4qA and 4qB alleles
chr3	12796030	13705368	4q-D4Z4 interactions common between 4qA and 4qB alleles		chr3	63046030	64488382	4q-D4Z4 interactions common between 4qA and 4qB alleles
chr3	17296030	18205368	4q-D4Z4 interactions common between 4qA and 4qB alleles		chr3	74649169	75738382	4q-D4Z4 interactions common between 4qA and 4qB alleles
chr3	23649169	24955368	4q-D4Z4 interactions common between 4qA and 4qB alleles		chr3	114205368	115488382	4q-D4Z4 interactions common between 4qA and 4qB alleles
chr3	27205368	29238382	4q-D4Z4 interactions common between 4qA and 4qB alleles		chr3	133149169	135205368	4q-D4Z4 interactions common between 4qA and 4qB alleles
chr3	30796030	32238382	4q-D4Z4 interactions common between 4qA and 4qB alleles		chr3	153796030	156205368	4q-D4Z4 interactions common between 4qA and 4qB alleles
chr3	50649169	51955368	4q-D4Z4 interactions common between 4qA and 4qB alleles		chr3	170296030	170455368	4q-D4Z4 interactions common between 4qA and 4qB alleles
chr3	53649169	55705368	4q-D4Z4 interactions common between 4qA and 4qB alleles		chr3	180955368	182238382	4q-D4Z4 interactions common between 4qA and 4qB alleles
chr3	57399169	58488382	4q-D4Z4 interactions common between 4qA and 4qB alleles		chr3	183796030	186205368	4q-D4Z4 interactions common between 4qA and 4qB alleles
chr3	71296030	72399169	4q-D4Z4 interactions common between 4qA and 4qB alleles		chr3	191455368	196149169	4q-D4Z4 interactions common between 4qA and 4qB alleles
chr3	83296030	84205368	4q-D4Z4 interactions common between 4qA and 4qB alleles		chr4	117783	423880	4q-D4Z4 interactions common between 4qA and 4qB alleles
chr3	97546030	98988382	4q-D4Z4 interactions common between 4qA and 4qB alleles		chr4	2867783	4617783	4q-D4Z4 interactions common between 4qA and 4qB alleles
chr3	112546030	113988382	4q-D4Z4 interactions common between 4qA and 4qB alleles		chr4	5117783	7867783	4q-D4Z4 interactions common between 4qA and 4qB alleles
chr3	124899169	125238382	4q-D4Z4 interactions common between 4qA and 4qB alleles		chr4	8651886	8867783	4q-D4Z4 interactions common between 4qA and 4qB alleles
chr3	150399169	152238382	4q-D4Z4 interactions common between 4qA and 4qB alleles		chr4	9617783	10117783	4q-D4Z4 interactions common between 4qA and 4qB alleles
chr3	168955368	170988382	4q-D4Z4 interactions common between 4qA and 4qB alleles		chr4	12901886	14117783	4q-D4Z4 interactions common between 4qA and 4qB alleles
chr3	177046030	178149169	4q-D4Z4 interactions common between 4qA and 4qB alleles		chr4	14867783	15901886	4q-D4Z4 interactions common between 4qA and 4qB alleles
chr3	178899169	182238382	4q-D4Z4 interactions common between 4qA and 4qB alleles		chr4	16651886	18401886	4q-D4Z4 interactions common between 4qA and 4qB alleles
chr3	183399169	184705368	4q-D4Z4 interactions common between 4qA and 4qB alleles		chr4	19401886	20901886	4q-D4Z4 interactions common between 4qA and 4qB alleles
chr3	188455368	189955368	4q-D4Z4 interactions common between 4qA and 4qB alleles		chr4	24151886	25151886	4q-D4Z4 interactions common between 4qA and 4qB alleles
chr3	190705368	192399169	4q-D4Z4 interactions common between 4qA and 4qB alleles		chr4	43367783	44367783	4q-D4Z4 interactions common between 4qA and 4qB alleles
chr3	193705368	194649169	4q-D4Z4 interactions common between 4qA and 4qB alleles		chr4	72401886	72867783	4q-D4Z4 interactions common between 4qA and 4qB alleles
chr3	196899169	198022430	4q-D4Z4 interactions common between 4qA and 4qB alleles		chr4	90367783	91117783	4q-D4Z4 interactions common between 4qA and 4qB alleles
chr4	1901886	3617783	4q-D4Z4 interactions common between 4qA and 4qB alleles		chr4	97867783	98151886	4q-D4Z4 interactions common between 4qA and 4qB alleles
chr4	4617783	6117783	4q-D4Z4 interactions common between 4qA and 4qB alleles		chr4	102867783	104867783	4q-D4Z4 interactions common between 4qA and 4qB alleles
chr4	8117783	9367783	4q-D4Z4 interactions common between 4qA and 4qB alleles		chr4	105617783	107367783	4q-D4Z4 interactions common between 4qA and 4qB alleles
chr4	10117783	10651886	4q-D4Z4 interactions common between 4qA and 4qB alleles		chr4	108151886	111901886	4q-D4Z4 interactions common between 4qA and 4qB alleles
chr4	14901886	15617783	4q-D4Z4 interactions common between 4qA and 4qB alleles		chr4	113151886	113367783	4q-D4Z4 interactions common between 4qA and 4qB alleles
chr4	17367783	17901886	4q-D4Z4 interactions common between 4qA and 4qB alleles		chr4	114117783	116651886	4q-D4Z4 interactions common between 4qA and 4qB alleles
chr4	19651886	20867783	4q-D4Z4 interactions common between 4qA and 4qB alleles		chr4	118401886	123367783	4q-D4Z4 interactions common between 4qA and 4qB alleles
chr4	23151886	26401886	4q-D4Z4 interactions common between 4qA and 4qB alleles		chr4	124401886	125651886	4q-D4Z4 interactions common between 4qA and 4qB alleles
chr4	29151886	29367783	4q-D4Z4 interactions common between 4qA and 4qB alleles		chr4	127651886	152366436	4q-D4Z4 interactions common between 4qA and 4qB alleles
chr4	40151886	41617783	4q-D4Z4 interactions common between 4qA and 4qB alleles		chr4	152887454	158747230	4q-D4Z4 interactions common between 4qA and 4qB alleles
chr4	52651886	53117783	4q-D4Z4 interactions common between 4qA and 4qB alleles		chr4	159097614	161444310	4q-D4Z4 interactions common between 4qA and 4qB alleles
chr4	53651886	53867783	4q-D4Z4 interactions common between 4qA and 4qB alleles		chr4	161798530	165180504	4q-D4Z4 interactions common between 4qA and 4qB alleles
chr4	55151886	55367783	4q-D4Z4 interactions common between 4qA and 4qB alleles		chr4	165464791	169296159	4q-D4Z4 interactions common between 4qA and 4qB alleles
chr4	61401886	61617783	4q-D4Z4 interactions common between 4qA and 4qB alleles		chr4	169620677	171990980	4q-D4Z4 interactions common between 4qA and 4qB alleles
chr4	69367783	69401886	4q-D4Z4 interactions common between 4qA and 4qB alleles		chr4	172831263	173209315	4q-D4Z4 interactions common between 4qA and 4qB alleles
chr4	71617783	72617783	4q-D4Z4 interactions common between 4qA and 4qB alleles		chr4	173373548	174661698	4q-D4Z4 interactions common between 4qA and 4qB alleles
chr4	75901886	76117783	4q-D4Z4 interactions common between 4qA and 4qB alleles		chr4	175035827	176017119	4q-D4Z4 interactions common between 4qA and 4qB alleles
chr4	78117783	79867783	4q-D4Z4 interactions common between 4qA and 4qB alleles		chr4	176266518	177553455	4q-D4Z4 interactions common between 4qA and 4qB alleles
chr4	80867783	82651886	4q-D4Z4 interactions common between 4qA and 4qB alleles		chr4	178056113	178765346	4q-D4Z4 interactions common between 4qA and 4qB alleles
chr4	85117783	85367783	4q-D4Z4 interactions common between 4qA and 4qB alleles		chr4	179027299	179527693	4q-D4Z4 interactions common between 4qA and 4qB alleles
chr4	91867783	92117783	4q-D4Z4 interactions common between 4qA and 4qB alleles		chr4	179733252	180203429	4q-D4Z4 interactions common between 4qA and 4qB alleles
chr4	93151886	94367783	4q-D4Z4 interactions common between 4qA and 4qB alleles		chr4	180393610	181618100	4q-D4Z4 interactions common between 4qA and 4qB alleles
chr4	95117783	95867783	4q-D4Z4 interactions common between 4qA and 4qB alleles		chr4	181829509	181895028	4q-D4Z4 interactions common between 4qA and 4qB alleles
chr4	98367783	98617783	4q-D4Z4 interactions common between 4qA and 4qB alleles		chr4	182013486	182568863	4q-D4Z4 interactions common between 4qA and 4qB alleles
chr4	103117783	103367783	4q-D4Z4 interactions common between 4qA and 4qB alleles		chr4	182755786	183509901	4q-D4Z4 interactions common between 4qA and 4qB alleles
chr4	104151886	105117783	4q-D4Z4 interactions common between 4qA and 4qB alleles		chr4	183576238	183728614	4q-D4Z4 interactions common between 4qA and 4qB alleles
chr4	107117783	107617783	4q-D4Z4 interactions common between 4qA and 4qB alleles		chr4	183896380	183902092	4q-D4Z4 interactions common between 4qA and 4qB alleles
chr4	109651886	111367783	4q-D4Z4 interactions common between 4qA and 4qB alleles		chr4	184125171	186133354	4q-D4Z4 interactions common between 4qA and 4qB alleles
chr4	112617783	114367783	4q-D4Z4 interactions common between 4qA and 4qB alleles		chr4	186288703	187847348	4q-D4Z4 interactions common between 4qA and 4qB alleles
chr4	115117783	117117783	4q-D4Z4 interactions common between 4qA and 4qB alleles		chr4	187851965	188002979	4q-D4Z4 interactions common between 4qA and 4qB alleles
chr4	119867783	161280586	4q-D4Z4 interactions common between 4qA and 4qB alleles		chr4	188007796	189124460	4q-D4Z4 interactions common between 4qA and 4qB alleles
chr4	161617897	162505715	4q-D4Z4 interactions common between 4qA and 4qB alleles		chr4	189390494	189431043	4q-D4Z4 interactions common between 4qA and 4qB alleles
chr4	162857640	165001613	4q-D4Z4 interactions common between 4qA and 4qB alleles		chr4	189436829	189730920	4q-D4Z4 interactions common between 4qA and 4qB alleles
chr4	165475486	167313659	4q-D4Z4 interactions common between 4qA and 4qB alleles		chr4	189742525	189751139	4q-D4Z4 interactions common between 4qA and 4qB alleles
chr4	167504839	168442745	4q-D4Z4 interactions common between 4qA and 4qB alleles		chr4	189821829	190007454	4q-D4Z4 interactions common between 4qA and 4qB alleles
chr4	168690689	169685669	4q-D4Z4 interactions common between 4qA and 4qB alleles		chr4	190096459	190125817	4q-D4Z4 interactions common between 4qA and 4qB alleles
chr4	170333327	175097500	4q-D4Z4 interactions common between 4qA and 4qB alleles		chr4	190211747	190400919	4q-D4Z4 interactions common between 4qA and 4qB alleles
chr4	175395847	175879356	4q-D4Z4 interactions common between 4qA and 4qB alleles		chr4	190403833	190411068	4q-D4Z4 interactions common between 4qA and 4qB alleles
chr4	176509207	179527693	4q-D4Z4 interactions common between 4qA and 4qB alleles		chr4	190499987	190506862	4q-D4Z4 interactions common between 4qA and 4qB alleles
chr4	180088349	180762838	4q-D4Z4 interactions common between 4qA and 4qB alleles		chr4	190599408	190712092	4q-D4Z4 interactions common between 4qA and 4qB alleles
chr4	181001367	181136100	4q-D4Z4 interactions common between 4qA and 4qB alleles		chr5	20442	5157257	4q-D4Z4 interactions common between 4qA and 4qB alleles
chr4	181399382	182576425	4q-D4Z4 interactions common between 4qA and 4qB alleles		chr5	89979587	91088849	4q-D4Z4 interactions common between 4qA and 4qB alleles
chr4	182720258	183207287	4q-D4Z4 interactions common between 4qA and 4qB alleles		chr5	123540134	124479587	4q-D4Z4 interactions common between 4qA and 4qB alleles
chr4	183805317	183934206	4q-D4Z4 interactions common between 4qA and 4qB alleles		chr5	133710319	135338849	4q-D4Z4 interactions common between 4qA and 4qB alleles
chr4	184125171	185479077	4q-D4Z4 interactions common between 4qA and 4qB alleles		chr5	146229587	146460319	4q-D4Z4 interactions common between 4qA and 4qB alleles
chr4	185681397	186149065	4q-D4Z4 interactions common between 4qA and 4qB alleles		chr5	151710319	152979587	4q-D4Z4 interactions common between 4qA and 4qB alleles
chr4	186158130	186236269	4q-D4Z4 interactions common between 4qA and 4qB alleles		chr5	154838849	156540134	4q-D4Z4 interactions common between 4qA and 4qB alleles
chr4	186410648	188668813	4q-D4Z4 interactions common between 4qA and 4qB alleles		chr5	159210319	159338849	4q-D4Z4 interactions common between 4qA and 4qB alleles
chr4	188720474	188728822	4q-D4Z4 interactions common between 4qA and 4qB alleles		chr5	168210319	171729587	4q-D4Z4 interactions common between 4qA and 4qB alleles
chr4	188769509	189094574	4q-D4Z4 interactions common between 4qA and 4qB alleles		chr5	172838849	175838849	4q-D4Z4 interactions common between 4qA and 4qB alleles
chr4	189267903	189288981	4q-D4Z4 interactions common between 4qA and 4qB alleles		chr5	176229587	180915260	4q-D4Z4 interactions common between 4qA and 4qB alleles
chr4	189366047	189984457	4q-D4Z4 interactions common between 4qA and 4qB alleles		chr6	140328	2303052	4q-D4Z4 interactions common between 4qA and 4qB alleles
chr4	190096459	190597500	4q-D4Z4 interactions common between 4qA and 4qB alleles		chr6	10023147	10221690	4q-D4Z4 interactions common between 4qA and 4qB alleles
chr4	190599408	190648481	4q-D4Z4 interactions common between 4qA and 4qB alleles		chr6	10390581	13221690	4q-D4Z4 interactions common between 4qA and 4qB alleles
chr4	190691443	190702551	4q-D4Z4 interactions common between 4qA and 4qB alleles		chr6	18273147	19221690	4q-D4Z4 interactions common between 4qA and 4qB alleles
chr5	13290134	14229587	4q-D4Z4 interactions common between 4qA and 4qB alleles		chr6	134721690	135640581	4q-D4Z4 interactions common between 4qA and 4qB alleles
chr5	32460319	34479587	4q-D4Z4 interactions common between 4qA and 4qB alleles		chr6	138273147	138640581	4q-D4Z4 interactions common between 4qA and 4qB alleles
chr5	58088849	61290134	4q-D4Z4 interactions common between 4qA and 4qB alleles		chr6	140140581	141235296	4q-D4Z4 interactions common between 4qA and 4qB alleles
chr5	84729587	84960319	4q-D4Z4 interactions common between 4qA and 4qB alleles		chr6	141273147	141471690	4q-D4Z4 interactions common between 4qA and 4qB alleles
chr5	92588849	93540134	4q-D4Z4 interactions common between 4qA and 4qB alleles		chr6	151390581	151735296	4q-D4Z4 interactions common between 4qA and 4qB alleles
chr5	110040134	111729587	4q-D4Z4 interactions common between 4qA and 4qB alleles		chr6	151773147	155721690	4q-D4Z4 interactions common between 4qA and 4qB alleles
chr5	125979587	126210319	4q-D4Z4 interactions common between 4qA and 4qB alleles		chr6	155890581	156273147	4q-D4Z4 interactions common between 4qA and 4qB alleles
chr5	128790134	128979587	4q-D4Z4 interactions common between 4qA and 4qB alleles		chr6	159273147	162235296	4q-D4Z4 interactions common between 4qA and 4qB alleles
chr5	133479587	134040134	4q-D4Z4 interactions common between 4qA and 4qB alleles		chr6	162273147	162471690	4q-D4Z4 interactions common between 4qA and 4qB alleles
chr5	137229587	138338849	4q-D4Z4 interactions common between 4qA and 4qB alleles		chr6	163390581	164485296	4q-D4Z4 interactions common between 4qA and 4qB alleles
chr5	140588849	142290134	4q-D4Z4 interactions common between 4qA and 4qB alleles		chr6	164523147	165985296	4q-D4Z4 interactions common between 4qA and 4qB alleles
chr5	158460319	162540134	4q-D4Z4 interactions common between 4qA and 4qB alleles		chr6	166735296	169446788	4q-D4Z4 interactions common between 4qA and 4qB alleles
chr5	164588849	166838849	4q-D4Z4 interactions common between 4qA and 4qB alleles		chr6	170341176	171115067	4q-D4Z4 interactions common between 4qA and 4qB alleles
chr5	167229587	170229587	4q-D4Z4 interactions common between 4qA and 4qB alleles		chr7	6959856	8595555	4q-D4Z4 interactions common between 4qA and 4qB alleles
chr5	173588849	174540134	4q-D4Z4 interactions common between 4qA and 4qB alleles		chr7	24959856	25845555	4q-D4Z4 interactions common between 4qA and 4qB alleles
chr5	175290134	176077094	4q-D4Z4 interactions common between 4qA and 4qB alleles		chr7	43964242	44423520	4q-D4Z4 interactions common between 4qA and 4qB alleles
chr5	177721807	179162555	4q-D4Z4 interactions common between 4qA and 4qB alleles		chr7	82845555	83714242	4q-D4Z4 interactions common between 4qA and 4qB alleles
chr5	179929887	180634507	4q-D4Z4 interactions common between 4qA and 4qB alleles		chr7	124214242	125423520	4q-D4Z4 interactions common between 4qA and 4qB alleles
chr6	140328	2303052	4q-D4Z4 interactions common between 4qA and 4qB alleles		chr7	129464242	132209856	4q-D4Z4 interactions common between 4qA and 4qB alleles
chr6	11140581	12471690	4q-D4Z4 interactions common between 4qA and 4qB alleles		chr7	137595555	138173520	4q-D4Z4 interactions common between 4qA and 4qB alleles
chr6	27273147	28390581	4q-D4Z4 interactions common between 4qA and 4qB alleles		chr7	140459856	140595555	4q-D4Z4 interactions common between 4qA and 4qB alleles
chr6	74721690	76390581	4q-D4Z4 interactions common between 4qA and 4qB alleles		chr7	145095555	146423520	4q-D4Z4 interactions common between 4qA and 4qB alleles
chr6	98721690	99640581	4q-D4Z4 interactions common between 4qA and 4qB alleles		chr7	148214242	150345555	4q-D4Z4 interactions common between 4qA and 4qB alleles
chr6	119721690	121735296	4q-D4Z4 interactions common between 4qA and 4qB alleles		chr7	151964242	157574356	4q-D4Z4 interactions common between 4qA and 4qB alleles
chr6	130390581	131485296	4q-D4Z4 interactions common between 4qA and 4qB alleles		chr7	157590280	157647139	4q-D4Z4 interactions common between 4qA and 4qB alleles
chr6	139773147	140890581	4q-D4Z4 interactions common between 4qA and 4qB alleles		chr7	157906108	159138663	4q-D4Z4 interactions common between 4qA and 4qB alleles
chr6	142221690	144235296	4q-D4Z4 interactions common between 4qA and 4qB alleles		chr8	46948	2874012	4q-D4Z4 interactions common between 4qA and 4qB alleles
chr6	145773147	147471690	4q-D4Z4 interactions common between 4qA and 4qB alleles		chr8	13255578	13460480	4q-D4Z4 interactions common between 4qA and 4qB alleles
chr6	148221690	149890581	4q-D4Z4 interactions common between 4qA and 4qB alleles		chr8	17005578	18332533	4q-D4Z4 interactions common between 4qA and 4qB alleles
chr6	153273147	153471690	4q-D4Z4 interactions common between 4qA and 4qB alleles		chr8	18505578	19460480	4q-D4Z4 interactions common between 4qA and 4qB alleles
chr6	158890581	160971690	4q-D4Z4 interactions common between 4qA and 4qB alleles		chr8	80960480	82832533	4q-D4Z4 interactions common between 4qA and 4qB alleles
chr6	161140581	163390581	4q-D4Z4 interactions common between 4qA and 4qB alleles		chr8	115460480	119582533	4q-D4Z4 interactions common between 4qA and 4qB alleles
chr6	166221690	168985296	4q-D4Z4 interactions common between 4qA and 4qB alleles		chr8	119755578	121082533	4q-D4Z4 interactions common between 4qA and 4qB alleles
chr6	169023147	169977235	4q-D4Z4 interactions common between 4qA and 4qB alleles		chr8	127255578	129332533	4q-D4Z4 interactions common between 4qA and 4qB alleles
chr6	170473329	171115067	4q-D4Z4 interactions common between 4qA and 4qB alleles		chr8	133460480	138332533	4q-D4Z4 interactions common between 4qA and 4qB alleles
chr7	16058	3912426	4q-D4Z4 interactions common between 4qA and 4qB alleles		chr8	139255578	142832533	4q-D4Z4 interactions common between 4qA and 4qB alleles
chr7	8459856	8595555	4q-D4Z4 interactions common between 4qA and 4qB alleles		chr8	143005578	144332533	4q-D4Z4 interactions common between 4qA and 4qB alleles
chr7	9464242	10673520	4q-D4Z4 interactions common between 4qA and 4qB alleles		chr8	145255578	146364022	4q-D4Z4 interactions common between 4qA and 4qB alleles
chr7	34964242	36173520	4q-D4Z4 interactions common between 4qA and 4qB alleles		chr9	28099	3083022	4q-D4Z4 interactions common between 4qA and 4qB alleles
chr7	49709856	51959856	4q-D4Z4 interactions common between 4qA and 4qB alleles		chr9	8092059	8305560	4q-D4Z4 interactions common between 4qA and 4qB alleles
chr7	60959856	61845555	4q-D4Z4 interactions common between 4qA and 4qB alleles		chr9	97093278	97096460	4q-D4Z4 interactions common between 4qA and 4qB alleles
chr7	66464242	67673520	4q-D4Z4 interactions common between 4qA and 4qB alleles		chr9	98092059	100096460	4q-D4Z4 interactions common between 4qA and 4qB alleles
chr7	93959856	95423520	4q-D4Z4 interactions common between 4qA and 4qB alleles		chr9	103846460	105592059	4q-D4Z4 interactions common between 4qA and 4qB alleles
chr7	97709856	98595555	4q-D4Z4 interactions common between 4qA and 4qB alleles		chr9	106096460	108055560	4q-D4Z4 interactions common between 4qA and 4qB alleles
chr7	98714242	100673520	4q-D4Z4 interactions common between 4qA and 4qB alleles		chr9	109843278	109846460	4q-D4Z4 interactions common between 4qA and 4qB alleles
chr7	118845555	121673520	4q-D4Z4 interactions common between 4qA and 4qB alleles		chr9	110092059	111592059	4q-D4Z4 interactions common between 4qA and 4qB alleles
chr7	148214242	157946533	4q-D4Z4 interactions common between 4qA and 4qB alleles		chr9	120346460	121846460	4q-D4Z4 interactions common between 4qA and 4qB alleles
chr7	158011738	159138663	4q-D4Z4 interactions common between 4qA and 4qB alleles		chr9	124555560	126055560	4q-D4Z4 interactions common between 4qA and 4qB alleles
chr8	46948	2874012	4q-D4Z4 interactions common between 4qA and 4qB alleles		chr9	129805560	130096460	4q-D4Z4 interactions common between 4qA and 4qB alleles
chr8	8005578	8960480	4q-D4Z4 interactions common between 4qA and 4qB alleles		chr9	134092059	135343278	4q-D4Z4 interactions common between 4qA and 4qB alleles
chr8	77755578	79082533	4q-D4Z4 interactions common between 4qA and 4qB alleles		chr9	140342318	141213431	4q-D4Z4 interactions common between 4qA and 4qB alleles
chr8	81505578	82832533	4q-D4Z4 interactions common between 4qA and 4qB alleles		chrX	22232374	24378413	4q-D4Z4 interactions common between 4qA and 4qB alleles
chr8	86005578	87505578	4q-D4Z4 interactions common between 4qA and 4qB alleles		chrX	40232374	41162928	4q-D4Z4 interactions common between 4qA and 4qB alleles
chr8	88255578	89736602	4q-D4Z4 interactions common between 4qA and 4qB alleles		chrX	117662928	118878413	4q-D4Z4 interactions common between 4qA and 4qB alleles
chr8	98210480	100082533	4q-D4Z4 interactions common between 4qA and 4qB alleles		chrX	134162928	135389509	4q-D4Z4 interactions common between 4qA and 4qB alleles
chr8	119960480	121832533	4q-D4Z4 interactions common between 4qA and 4qB alleles		chrX	137732374	139128413	4q-D4Z4 interactions common between 4qA and 4qB alleles
chr8	123332533	124986602	4q-D4Z4 interactions common between 4qA and 4qB alleles		chrX	151412928	153389509	4q-D4Z4 interactions common between 4qA and 4qB alleles
chr8	127460480	127832533	4q-D4Z4 interactions common between 4qA and 4qB alleles		chrX	153482374	154878413	4q-D4Z4 interactions common between 4qA and 4qB alleles
chr8	128005578	129332533	4q-D4Z4 interactions common between 4qA and 4qB alleles
chr8	134582533	135486602	4q-D4Z4 interactions common between 4qA and 4qB alleles
chr8	139832533	142255578	4q-D4Z4 interactions common between 4qA and 4qB alleles
chr8	143582533	143960480	4q-D4Z4 interactions common between 4qA and 4qB alleles
chr9	28099	2656020	4q-D4Z4 interactions common between 4qA and 4qB alleles
chr9	24592059	25555560	4q-D4Z4 interactions common between 4qA and 4qB alleles
chr9	26305560	26596460	4q-D4Z4 interactions common between 4qA and 4qB alleles
chr9	42343278	43555560	4q-D4Z4 interactions common between 4qA and 4qB alleles
chr9	44593278	44596460	4q-D4Z4 interactions common between 4qA and 4qB alleles
chr9	69343278	69346460	4q-D4Z4 interactions common between 4qA and 4qB alleles
chr9	70096460	71092059	4q-D4Z4 interactions common between 4qA and 4qB alleles
chr9	88843278	90055560	4q-D4Z4 interactions common between 4qA and 4qB alleles
chr9	102343278	104305560	4q-D4Z4 interactions common between 4qA and 4qB alleles
chr9	106342059	108055560	4q-D4Z4 interactions common between 4qA and 4qB alleles
chr9	117592059	117805560	4q-D4Z4 interactions common between 4qA and 4qB alleles
chr9	119593278	121096460	4q-D4Z4 interactions common between 4qA and 4qB alleles
chr9	123805560	125596460	4q-D4Z4 interactions common between 4qA and 4qB alleles
chr9	133342059	134593278	4q-D4Z4 interactions common between 4qA and 4qB alleles
chr9	140092059	141213431	4q-D4Z4 interactions common between 4qA and 4qB alleles
chrX	626376	4232374	4q-D4Z4 interactions common between 4qA and 4qB alleles
chrX	15662928	16139509	4q-D4Z4 interactions common between 4qA and 4qB alleles
chrX	16232374	16878413	4q-D4Z4 interactions common between 4qA and 4qB alleles
chrX	24482374	25878413	4q-D4Z4 interactions common between 4qA and 4qB alleles
chrX	90662928	92628413	4q-D4Z4 interactions common between 4qA and 4qB alleles
chrX	135482374	138378413	4q-D4Z4 interactions common between 4qA and 4qB alleles
chrX	148128413	150378413	4q-D4Z4 interactions common between 4qA and 4qB alleles

## Sheet: 4q alleles lost int. comparison
4qB vs 4qA lost interactions
Chr	Start	End	Annotation
chr1	66035778	67535778	4q-D4Z4 interactions specifically lost by the 4qA allele
chr1	86559764	88535778	4q-D4Z4 interactions specifically lost by the 4qA allele
chr1	150035778	150963652	4q-D4Z4 interactions specifically lost by the 4qA allele
chr1	159963652	161285778	4q-D4Z4 interactions specifically lost by the 4qA allele
chr1	168963652	172030871	4q-D4Z4 interactions specifically lost by the 4qA allele
chr1	173559764	177035778	4q-D4Z4 interactions specifically lost by the 4qA allele
chr1	197559764	199780871	4q-D4Z4 interactions specifically lost by the 4qA allele
chr1	205535778	207213652	4q-D4Z4 interactions specifically lost by the 4qA allele
chr10	6649868	9809024	4q-D4Z4 interactions specifically lost by the 4qA allele
chr10	34399868	35864112	4q-D4Z4 interactions specifically lost by the 4qA allele
chr10	51649868	53864112	4q-D4Z4 interactions specifically lost by the 4qA allele
chr10	56149868	58364112	4q-D4Z4 interactions specifically lost by the 4qA allele
chr10	73635715	75282909	4q-D4Z4 interactions specifically lost by the 4qA allele
chr10	101732822	102143195	4q-D4Z4 interactions specifically lost by the 4qA allele
chr10	103270504	104024070	4q-D4Z4 interactions specifically lost by the 4qA allele
chr10	104075355	104876503	4q-D4Z4 interactions specifically lost by the 4qA allele
chr10	127900761	128196439	4q-D4Z4 interactions specifically lost by the 4qA allele
chr11	76419999	77773178	4q-D4Z4 interactions specifically lost by the 4qA allele
chr11	78790225	82273178	4q-D4Z4 interactions specifically lost by the 4qA allele
chr11	98290225	99656462	4q-D4Z4 interactions specifically lost by the 4qA allele
chr12	12470113	14379574	4q-D4Z4 interactions specifically lost by the 4qA allele
chr12	21990898	23991355	4q-D4Z4 interactions specifically lost by the 4qA allele
chr12	55629574	57129574	4q-D4Z4 interactions specifically lost by the 4qA allele
chr13	69872127	71949127	4q-D4Z4 interactions specifically lost by the 4qA allele
chr15	67866558	70111214	4q-D4Z4 interactions specifically lost by the 4qA allele
chr16	17624756	19025603	4q-D4Z4 interactions specifically lost by the 4qA allele
chr16	45570600	48275603	4q-D4Z4 interactions specifically lost by the 4qA allele
chr16	56543558	58320600	4q-D4Z4 interactions specifically lost by the 4qA allele
chr17	20534736	23151495	4q-D4Z4 interactions specifically lost by the 4qA allele
chr17	36158111	37714395	4q-D4Z4 interactions specifically lost by the 4qA allele
chr17	50151495	51284736	4q-D4Z4 interactions specifically lost by the 4qA allele
chr17	51651495	53464395	4q-D4Z4 interactions specifically lost by the 4qA allele
chr17	59151495	62901495	4q-D4Z4 interactions specifically lost by the 4qA allele
chr17	69214395	72651495	4q-D4Z4 interactions specifically lost by the 4qA allele
chr17	72908111	76034736	4q-D4Z4 interactions specifically lost by the 4qA allele
chr18	28406709	29906709	4q-D4Z4 interactions specifically lost by the 4qA allele
chr18	54278844	56503491	4q-D4Z4 interactions specifically lost by the 4qA allele
chr18	60278844	61778844	4q-D4Z4 interactions specifically lost by the 4qA allele
chr18	62879889	64753491	4q-D4Z4 interactions specifically lost by the 4qA allele
chr18	74156709	77528844	4q-D4Z4 interactions specifically lost by the 4qA allele
chr2	71097982	72597982	4q-D4Z4 interactions specifically lost by the 4qA allele
chr2	99597982	101835352	4q-D4Z4 interactions specifically lost by the 4qA allele
chr2	112660506	116097982	4q-D4Z4 interactions specifically lost by the 4qA allele
chr2	147682184	149182184	4q-D4Z4 interactions specifically lost by the 4qA allele
chr2	149847982	151347982	4q-D4Z4 interactions specifically lost by the 4qA allele
chr2	161410506	163347982	4q-D4Z4 interactions specifically lost by the 4qA allele
chr2	170410506	172347982	4q-D4Z4 interactions specifically lost by the 4qA allele
chr20	34411093	35710505	4q-D4Z4 interactions specifically lost by the 4qA allele
chr22	23212047	24712047	4q-D4Z4 interactions specifically lost by the 4qA allele
chr22	34962047	37962047	4q-D4Z4 interactions specifically lost by the 4qA allele
chr3	44296030	45796030	4q-D4Z4 interactions specifically lost by the 4qA allele
chr3	50296030	52488382	4q-D4Z4 interactions specifically lost by the 4qA allele
chr3	129796030	131238382	4q-D4Z4 interactions specifically lost by the 4qA allele
chr3	159955368	162955368	4q-D4Z4 interactions specifically lost by the 4qA allele
chr3	173296030	174738382	4q-D4Z4 interactions specifically lost by the 4qA allele
chr4	39367783	41651886	4q-D4Z4 interactions specifically lost by the 4qA allele
chr4	47367783	47867783	4q-D4Z4 interactions specifically lost by the 4qA allele
chr4	68151886	68401886	4q-D4Z4 interactions specifically lost by the 4qA allele
chr4	91401886	92151886	4q-D4Z4 interactions specifically lost by the 4qA allele
chr4	93117783	96151886	4q-D4Z4 interactions specifically lost by the 4qA allele
chr4	98151886	98651886	4q-D4Z4 interactions specifically lost by the 4qA allele
chr4	190810451	190823281	4q-D4Z4 interactions specifically lost by the 4qA allele
chr5	6729587	8229587	4q-D4Z4 interactions specifically lost by the 4qA allele
chr5	32229587	35790134	4q-D4Z4 interactions specifically lost by the 4qA allele
chr5	56229587	57338849	4q-D4Z4 interactions specifically lost by the 4qA allele
chr5	109838849	113460319	4q-D4Z4 interactions specifically lost by the 4qA allele
chr6	13773147	15985296	4q-D4Z4 interactions specifically lost by the 4qA allele
chr7	16058	3923520	4q-D4Z4 interactions specifically lost by the 4qA allele
chr7	97214242	100845555	4q-D4Z4 interactions specifically lost by the 4qA allele
chr7	125459856	128423520	4q-D4Z4 interactions specifically lost by the 4qA allele
chr8	26005578	28082533	4q-D4Z4 interactions specifically lost by the 4qA allele
chr8	85986602	90505578	4q-D4Z4 interactions specifically lost by the 4qA allele
chr8	98005578	100236602	4q-D4Z4 interactions specifically lost by the 4qA allele
chr9	20596460	22846460	4q-D4Z4 interactions specifically lost by the 4qA allele
chrX	8628413	10412928	4q-D4Z4 interactions specifically lost by the 4qA allele
chrX	38628413	40128413	4q-D4Z4 interactions specifically lost by the 4qA allele
chrX	147482374	150389509	4q-D4Z4 interactions specifically lost by the 4qA allele
chr1	45963652	48280871	4q-D4Z4 interactions specifically lost by the 4qB allele
chr10	19559024	21059024	4q-D4Z4 interactions specifically lost by the 4qB allele
chr11	12656462	14906462	4q-D4Z4 interactions specifically lost by the 4qB allele
chr11	69790225	74156462	4q-D4Z4 interactions specifically lost by the 4qB allele
chr11	118419999	119919999	4q-D4Z4 interactions specifically lost by the 4qB allele
chr11	124540225	126656462	4q-D4Z4 interactions specifically lost by the 4qB allele
chr13	26372127	27872127	4q-D4Z4 interactions specifically lost by the 4qB allele
chr13	76517241	78699127	4q-D4Z4 interactions specifically lost by the 4qB allele
chr13	79517241	80949127	4q-D4Z4 interactions specifically lost by the 4qB allele
chr13	82173573	83372127	4q-D4Z4 interactions specifically lost by the 4qB allele
chr13	90872127	92372127	4q-D4Z4 interactions specifically lost by the 4qB allele
chr13	98267241	99699127	4q-D4Z4 interactions specifically lost by the 4qB allele
chr14	19064497	22622885	4q-D4Z4 interactions specifically lost by the 4qB allele
chr14	58343691	63735943	4q-D4Z4 interactions specifically lost by the 4qB allele
chr14	67410764	68985943	4q-D4Z4 interactions specifically lost by the 4qB allele
chr14	74910764	77093691	4q-D4Z4 interactions specifically lost by the 4qB allele
chr14	102285179	103485943	4q-D4Z4 interactions specifically lost by the 4qB allele
chr15	88116558	90361214	4q-D4Z4 interactions specifically lost by the 4qB allele
chr16	11624756	13793558	4q-D4Z4 interactions specifically lost by the 4qB allele
chr16	52793558	55043558	4q-D4Z4 interactions specifically lost by the 4qB allele
chr16	62820600	64043558	4q-D4Z4 interactions specifically lost by the 4qB allele
chr17	46744	4784736	4q-D4Z4 interactions specifically lost by the 4qB allele
chr17	80151495	81195210	4q-D4Z4 interactions specifically lost by the 4qB allele
chr18	37753491	40753491	4q-D4Z4 interactions specifically lost by the 4qB allele
chr19	30735890	32972039	4q-D4Z4 interactions specifically lost by the 4qB allele
chr19	43986569	46472039	4q-D4Z4 interactions specifically lost by the 4qB allele
chr2	20182184	23085352	4q-D4Z4 interactions specifically lost by the 4qB allele
chr2	38932184	41835352	4q-D4Z4 interactions specifically lost by the 4qB allele
chr2	91347982	93585352	4q-D4Z4 interactions specifically lost by the 4qB allele
chr2	135597982	138597982	4q-D4Z4 interactions specifically lost by the 4qB allele
chr20	10574156	12666924	4q-D4Z4 interactions specifically lost by the 4qB allele
chr20	48824156	56166924	4q-D4Z4 interactions specifically lost by the 4qB allele
chr21	25257383	27636836	4q-D4Z4 interactions specifically lost by the 4qB allele
chr3	23296030	25488382	4q-D4Z4 interactions specifically lost by the 4qB allele
chr3	70705368	73488382	4q-D4Z4 interactions specifically lost by the 4qB allele
chr3	156205368	157705368	4q-D4Z4 interactions specifically lost by the 4qB allele
chr4	44401886	44651886	4q-D4Z4 interactions specifically lost by the 4qB allele
chr4	67117783	67367783	4q-D4Z4 interactions specifically lost by the 4qB allele
chr4	87367783	88617783	4q-D4Z4 interactions specifically lost by the 4qB allele
chr4	90117783	90367783	4q-D4Z4 interactions specifically lost by the 4qB allele
chr4	190720798	190799711	4q-D4Z4 interactions specifically lost by the 4qB allele
chr4	190823785	190841776	4q-D4Z4 interactions specifically lost by the 4qB allele
chr5	57960319	61479587	4q-D4Z4 interactions specifically lost by the 4qB allele
chr5	102729587	104588849	4q-D4Z4 interactions specifically lost by the 4qB allele
chr5	125040134	130710319	4q-D4Z4 interactions specifically lost by the 4qB allele
chr5	135960319	138540134	4q-D4Z4 interactions specifically lost by the 4qB allele
chr6	26890581	28735296	4q-D4Z4 interactions specifically lost by the 4qB allele
chr6	46023147	47485296	4q-D4Z4 interactions specifically lost by the 4qB allele
chr6	78273147	80485296	4q-D4Z4 interactions specifically lost by the 4qB allele
chr6	119523147	121971690	4q-D4Z4 interactions specifically lost by the 4qB allele
chr6	130023147	132471690	4q-D4Z4 interactions specifically lost by the 4qB allele
chr7	32459856	36464242	4q-D4Z4 interactions specifically lost by the 4qB allele
chr7	83714242	85845555	4q-D4Z4 interactions specifically lost by the 4qB allele
chr7	132959856	134423520	4q-D4Z4 interactions specifically lost by the 4qB allele
chr7	134714242	136095555	4q-D4Z4 interactions specifically lost by the 4qB allele
chr7	140714242	142214242	4q-D4Z4 interactions specifically lost by the 4qB allele
chr8	69486602	70986602	4q-D4Z4 interactions specifically lost by the 4qB allele
chr8	106255578	108505578	4q-D4Z4 interactions specifically lost by the 4qB allele
chr8	131005578	133082533	4q-D4Z4 interactions specifically lost by the 4qB allele
chr9	85093278	86593278	4q-D4Z4 interactions specifically lost by the 4qB allele
chr9	137092059	139342059	4q-D4Z4 interactions specifically lost by the 4qB allele
chrX	626376	7630449	4q-D4Z4 interactions specifically lost by the 4qB allele
chrX	14732374	17639509	4q-D4Z4 interactions specifically lost by the 4qB allele
chrX	17912928	19412928	4q-D4Z4 interactions specifically lost by the 4qB allele
chrX	90482374	92639509	4q-D4Z4 interactions specifically lost by the 4qB allele
chr1	40713652	42035778	4q-D4Z4 interactions lost by both 4qA and 4qB alleles
chr1	67809764	71285778	4q-D4Z4 interactions lost by both 4qA and 4qB alleles
chr1	75213652	76535778	4q-D4Z4 interactions lost by both 4qA and 4qB alleles
chr1	81963652	83463652	4q-D4Z4 interactions lost by both 4qA and 4qB alleles
chr1	100713652	102785778	4q-D4Z4 interactions lost by both 4qA and 4qB alleles
chr1	109809764	111280871	4q-D4Z4 interactions lost by both 4qA and 4qB alleles
chr1	112059764	113530871	4q-D4Z4 interactions lost by both 4qA and 4qB alleles
chr1	114963652	117035778	4q-D4Z4 interactions lost by both 4qA and 4qB alleles
chr1	141309764	142780871	4q-D4Z4 interactions lost by both 4qA and 4qB alleles
chr1	144309764	146530871	4q-D4Z4 interactions lost by both 4qA and 4qB alleles
chr1	156213652	157780871	4q-D4Z4 interactions lost by both 4qA and 4qB alleles
chr1	177963652	179285778	4q-D4Z4 interactions lost by both 4qA and 4qB alleles
chr1	193809764	196780871	4q-D4Z4 interactions lost by both 4qA and 4qB alleles
chr1	201309764	202780871	4q-D4Z4 interactions lost by both 4qA and 4qB alleles
chr10	59149868	61457910	4q-D4Z4 interactions lost by both 4qA and 4qB alleles
chr10	135477787	135534747	4q-D4Z4 interactions lost by both 4qA and 4qB alleles
chr11	17023178	18523178	4q-D4Z4 interactions lost by both 4qA and 4qB alleles
chr11	48790225	50156462	4q-D4Z4 interactions lost by both 4qA and 4qB alleles
chr11	50919999	52273178	4q-D4Z4 interactions lost by both 4qA and 4qB alleles
chr11	89773178	92773178	4q-D4Z4 interactions lost by both 4qA and 4qB alleles
chr12	9129574	10220113	4q-D4Z4 interactions lost by both 4qA and 4qB alleles
chr12	15240898	16740898	4q-D4Z4 interactions lost by both 4qA and 4qB alleles
chr12	53720113	55220113	4q-D4Z4 interactions lost by both 4qA and 4qB alleles
chr12	64740898	67491355	4q-D4Z4 interactions lost by both 4qA and 4qB alleles
chr12	69240898	71241355	4q-D4Z4 interactions lost by both 4qA and 4qB alleles
chr12	71490898	72741355	4q-D4Z4 interactions lost by both 4qA and 4qB alleles
chr12	81990898	83991355	4q-D4Z4 interactions lost by both 4qA and 4qB alleles
chr12	87741355	89241355	4q-D4Z4 interactions lost by both 4qA and 4qB alleles
chr12	90879574	93879574	4q-D4Z4 interactions lost by both 4qA and 4qB alleles
chr13	36017241	38949127	4q-D4Z4 interactions lost by both 4qA and 4qB alleles
chr13	60872127	61923573	4q-D4Z4 interactions lost by both 4qA and 4qB alleles
chr13	73517241	74949127	4q-D4Z4 interactions lost by both 4qA and 4qB alleles
chr14	23235943	24285179	4q-D4Z4 interactions lost by both 4qA and 4qB alleles
chr14	35235943	36285179	4q-D4Z4 interactions lost by both 4qA and 4qB alleles
chr14	40035179	41535179	4q-D4Z4 interactions lost by both 4qA and 4qB alleles
chr14	48660764	50093691	4q-D4Z4 interactions lost by both 4qA and 4qB alleles
chr14	65160764	66593691	4q-D4Z4 interactions lost by both 4qA and 4qB alleles
chr15	49866558	54361214	4q-D4Z4 interactions lost by both 4qA and 4qB alleles
chr15	58866558	61695488	4q-D4Z4 interactions lost by both 4qA and 4qB alleles
chr16	70736	4793558	4q-D4Z4 interactions lost by both 4qA and 4qB alleles
chr16	24293558	26070600	4q-D4Z4 interactions lost by both 4qA and 4qB alleles
chr16	67320600	68543558	4q-D4Z4 interactions lost by both 4qA and 4qB alleles
chr16	73793558	75293558	4q-D4Z4 interactions lost by both 4qA and 4qB alleles
chr16	82124756	84293558	4q-D4Z4 interactions lost by both 4qA and 4qB alleles
chr17	24214395	28658111	4q-D4Z4 interactions lost by both 4qA and 4qB alleles
chr17	28714395	31658111	4q-D4Z4 interactions lost by both 4qA and 4qB alleles
chr17	66284736	68151495	4q-D4Z4 interactions lost by both 4qA and 4qB alleles
chr18	11879889	13003491	4q-D4Z4 interactions lost by both 4qA and 4qB alleles
chr18	32528844	34028844	4q-D4Z4 interactions lost by both 4qA and 4qB alleles
chr18	69253491	73753491	4q-D4Z4 interactions lost by both 4qA and 4qB alleles
chr19	66103	3907036	4q-D4Z4 interactions lost by both 4qA and 4qB alleles
chr19	5985890	9722039	4q-D4Z4 interactions lost by both 4qA and 4qB alleles
chr19	10485890	13472039	4q-D4Z4 interactions lost by both 4qA and 4qB alleles
chr19	16236569	18446366	4q-D4Z4 interactions lost by both 4qA and 4qB alleles
chr19	22236569	23696366	4q-D4Z4 interactions lost by both 4qA and 4qB alleles
chr19	26736569	30446366	4q-D4Z4 interactions lost by both 4qA and 4qB alleles
chr19	35235890	36722039	4q-D4Z4 interactions lost by both 4qA and 4qB alleles
chr19	37986569	40472039	4q-D4Z4 interactions lost by both 4qA and 4qB alleles
chr19	46986569	49196366	4q-D4Z4 interactions lost by both 4qA and 4qB alleles
chr2	35097982	37660506	4q-D4Z4 interactions lost by both 4qA and 4qB alleles
chr2	62410506	63910506	4q-D4Z4 interactions lost by both 4qA and 4qB alleles
chr2	79660506	81597982	4q-D4Z4 interactions lost by both 4qA and 4qB alleles
chr2	85432184	86835352	4q-D4Z4 interactions lost by both 4qA and 4qB alleles
chr2	116182184	118335352	4q-D4Z4 interactions lost by both 4qA and 4qB alleles
chr2	128847982	130347982	4q-D4Z4 interactions lost by both 4qA and 4qB alleles
chr2	155097982	156160506	4q-D4Z4 interactions lost by both 4qA and 4qB alleles
chr2	157347982	158410506	4q-D4Z4 interactions lost by both 4qA and 4qB alleles
chr2	165910506	167410506	4q-D4Z4 interactions lost by both 4qA and 4qB alleles
chr2	168682184	170085352	4q-D4Z4 interactions lost by both 4qA and 4qB alleles
chr2	177160506	179097982	4q-D4Z4 interactions lost by both 4qA and 4qB alleles
chr20	119107	3666924	4q-D4Z4 interactions lost by both 4qA and 4qB alleles
chr20	14911093	16210505	4q-D4Z4 interactions lost by both 4qA and 4qB alleles
chr20	19411093	21460505	4q-D4Z4 interactions lost by both 4qA and 4qB alleles
chr20	28411093	31416924	4q-D4Z4 interactions lost by both 4qA and 4qB alleles
chr20	61574156	62916924	4q-D4Z4 interactions lost by both 4qA and 4qB alleles
chr21	18867501	20136836	4q-D4Z4 interactions lost by both 4qA and 4qB alleles
chr21	30507383	31964420	4q-D4Z4 interactions lost by both 4qA and 4qB alleles
chr21	32757383	34964420	4q-D4Z4 interactions lost by both 4qA and 4qB alleles
chr21	36507383	39464420	4q-D4Z4 interactions lost by both 4qA and 4qB alleles
chr22	19104175	20604175	4q-D4Z4 interactions lost by both 4qA and 4qB alleles
chr22	20962047	22241405	4q-D4Z4 interactions lost by both 4qA and 4qB alleles
chr22	28962047	31241405	4q-D4Z4 interactions lost by both 4qA and 4qB alleles
chr22	31962047	34241405	4q-D4Z4 interactions lost by both 4qA and 4qB alleles
chr22	41212047	42491405	4q-D4Z4 interactions lost by both 4qA and 4qB alleles
chr3	34546030	36738382	4q-D4Z4 interactions lost by both 4qA and 4qB alleles
chr3	38296030	39738382	4q-D4Z4 interactions lost by both 4qA and 4qB alleles
chr3	82149169	84738382	4q-D4Z4 interactions lost by both 4qA and 4qB alleles
chr3	85899169	87955368	4q-D4Z4 interactions lost by both 4qA and 4qB alleles
chr3	95296030	96738382	4q-D4Z4 interactions lost by both 4qA and 4qB alleles
chr3	97149169	99205368	4q-D4Z4 interactions lost by both 4qA and 4qB alleles
chr3	109546030	110988382	4q-D4Z4 interactions lost by both 4qA and 4qB alleles
chr3	121546030	122988382	4q-D4Z4 interactions lost by both 4qA and 4qB alleles
chr3	123046030	126955368	4q-D4Z4 interactions lost by both 4qA and 4qB alleles
chr3	136546030	137988382	4q-D4Z4 interactions lost by both 4qA and 4qB alleles
chr3	147796030	152455368	4q-D4Z4 interactions lost by both 4qA and 4qB alleles
chr3	165046030	167238382	4q-D4Z4 interactions lost by both 4qA and 4qB alleles
chr4	27401886	27901886	4q-D4Z4 interactions lost by both 4qA and 4qB alleles
chr4	29117783	29401886	4q-D4Z4 interactions lost by both 4qA and 4qB alleles
chr4	31401886	31651886	4q-D4Z4 interactions lost by both 4qA and 4qB alleles
chr4	35117783	35367783	4q-D4Z4 interactions lost by both 4qA and 4qB alleles
chr4	37901886	38151886	4q-D4Z4 interactions lost by both 4qA and 4qB alleles
chr4	42367783	42617783	4q-D4Z4 interactions lost by both 4qA and 4qB alleles
chr4	52617783	53151886	4q-D4Z4 interactions lost by both 4qA and 4qB alleles
chr4	53617783	54401886	4q-D4Z4 interactions lost by both 4qA and 4qB alleles
chr4	55117783	55901886	4q-D4Z4 interactions lost by both 4qA and 4qB alleles
chr4	59151886	59401886	4q-D4Z4 interactions lost by both 4qA and 4qB alleles
chr4	61367783	61651886	4q-D4Z4 interactions lost by both 4qA and 4qB alleles
chr4	65901886	66901886	4q-D4Z4 interactions lost by both 4qA and 4qB alleles
chr4	68901886	70367783	4q-D4Z4 interactions lost by both 4qA and 4qB alleles
chr4	100117783	101617783	4q-D4Z4 interactions lost by both 4qA and 4qB alleles
chr5	9210319	11040134	4q-D4Z4 interactions lost by both 4qA and 4qB alleles
chr5	12729587	14460319	4q-D4Z4 interactions lost by both 4qA and 4qB alleles
chr5	18540134	19710319	4q-D4Z4 interactions lost by both 4qA and 4qB alleles
chr5	41460319	43290134	4q-D4Z4 interactions lost by both 4qA and 4qB alleles
chr5	44979587	46838849	4q-D4Z4 interactions lost by both 4qA and 4qB alleles
chr5	50040134	51960319	4q-D4Z4 interactions lost by both 4qA and 4qB alleles
chr5	83790134	86229587	4q-D4Z4 interactions lost by both 4qA and 4qB alleles
chr5	92460319	94088849	4q-D4Z4 interactions lost by both 4qA and 4qB alleles
chr5	114540134	116040134	4q-D4Z4 interactions lost by both 4qA and 4qB alleles
chr6	5140581	6471690	4q-D4Z4 interactions lost by both 4qA and 4qB alleles
chr6	41140581	43221690	4q-D4Z4 interactions lost by both 4qA and 4qB alleles
chr6	55023147	56485296	4q-D4Z4 interactions lost by both 4qA and 4qB alleles
chr6	73773147	76735296	4q-D4Z4 interactions lost by both 4qA and 4qB alleles
chr6	97773147	100735296	4q-D4Z4 interactions lost by both 4qA and 4qB alleles
chr6	101140581	102471690	4q-D4Z4 interactions lost by both 4qA and 4qB alleles
chr6	106390581	107721690	4q-D4Z4 interactions lost by both 4qA and 4qB alleles
chr6	109390581	110721690	4q-D4Z4 interactions lost by both 4qA and 4qB alleles
chr6	115023147	117235296	4q-D4Z4 interactions lost by both 4qA and 4qB alleles
chr6	127221690	128721690	4q-D4Z4 interactions lost by both 4qA and 4qB alleles
chr6	145390581	150235296	4q-D4Z4 interactions lost by both 4qA and 4qB alleles
chr7	15209856	17423520	4q-D4Z4 interactions lost by both 4qA and 4qB alleles
chr7	17459856	18923520	4q-D4Z4 interactions lost by both 4qA and 4qB alleles
chr7	20459856	23423520	4q-D4Z4 interactions lost by both 4qA and 4qB alleles
chr7	49214242	52095555	4q-D4Z4 interactions lost by both 4qA and 4qB alleles
chr7	60464242	62423520	4q-D4Z4 interactions lost by both 4qA and 4qB alleles
chr7	66209856	67845555	4q-D4Z4 interactions lost by both 4qA and 4qB alleles
chr7	87959856	89423520	4q-D4Z4 interactions lost by both 4qA and 4qB alleles
chr7	93464242	95595555	4q-D4Z4 interactions lost by both 4qA and 4qB alleles
chr7	103214242	104595555	4q-D4Z4 interactions lost by both 4qA and 4qB alleles
chr7	118709856	121845555	4q-D4Z4 interactions lost by both 4qA and 4qB alleles
chr8	5005578	6332533	4q-D4Z4 interactions lost by both 4qA and 4qB alleles
chr8	7236602	9332533	4q-D4Z4 interactions lost by both 4qA and 4qB alleles
chr8	24505578	25832533	4q-D4Z4 interactions lost by both 4qA and 4qB alleles
chr8	31986602	32960480	4q-D4Z4 interactions lost by both 4qA and 4qB alleles
chr8	36486602	38210480	4q-D4Z4 interactions lost by both 4qA and 4qB alleles
chr8	56210480	59736602	4q-D4Z4 interactions lost by both 4qA and 4qB alleles
chr8	73255578	74582533	4q-D4Z4 interactions lost by both 4qA and 4qB alleles
chr8	77736602	79460480	4q-D4Z4 interactions lost by both 4qA and 4qB alleles
chr8	112255578	114332533	4q-D4Z4 interactions lost by both 4qA and 4qB alleles
chr8	122960480	125005578	4q-D4Z4 interactions lost by both 4qA and 4qB alleles
chr9	10342059	11596460	4q-D4Z4 interactions lost by both 4qA and 4qB alleles
chr9	23593278	28093278	4q-D4Z4 interactions lost by both 4qA and 4qB alleles
chr9	41842059	46555560	4q-D4Z4 interactions lost by both 4qA and 4qB alleles
chr9	75343278	76555560	4q-D4Z4 interactions lost by both 4qA and 4qB alleles
chr9	78343278	79555560	4q-D4Z4 interactions lost by both 4qA and 4qB alleles
chr9	81343278	82555560	4q-D4Z4 interactions lost by both 4qA and 4qB alleles
chr9	87346460	90592059	4q-D4Z4 interactions lost by both 4qA and 4qB alleles
chrX	71162928	72378413	4q-D4Z4 interactions lost by both 4qA and 4qB alleles
chrX	78482374	79889509	4q-D4Z4 interactions lost by both 4qA and 4qB alleles
chrX	83912928	85128413	4q-D4Z4 interactions lost by both 4qA and 4qB alleles
chrX	86912928	88878413	4q-D4Z4 interactions lost by both 4qA and 4qB alleles
chrX	118982374	121139509	4q-D4Z4 interactions lost by both 4qA and 4qB alleles
chrX	124878413	125912928	4q-D4Z4 interactions lost by both 4qA and 4qB alleles
chrY	18132899	20292300	4q-D4Z4 interactions lost by both 4qA and 4qB alleles

## Sheet: 10q common and lost interaction
CN-FSHD1 common 10q-D4Z4 interactions				FSHD1 lost 10q-D4Z4 interactions
Chr	Start	End		Chr	Start	End
chr1	1442006	2844834		chr1	15758304	16442006
chr1	12594952	12692006		chr1	24008304	26192006
chr1	37442006	38258304		chr1	46442006	47942006
chr1	242844952	243744648		chr1	81758304	83192006
chr10	110427	618442		chr1	201008304	202161933
chr10	1251624	1751624		chr1	214442006	215942006
chr10	73501624	73751624		chr1	221844952	222692006
chr10	77251624	79001624		chr1	230094952	231411933
chr10	80501624	80751624		chr10	2501624	2751624
chr10	81980712	83699619		chr10	8751624	9001624
chr10	84288666	84476538		chr10	12501624	12751624
chr10	86608418	87812365		chr10	34251624	34501624
chr10	91431858	92085110		chr10	45501624	46001624
chr10	96693953	96825908		chr10	54001624	54251624
chr10	97215913	97338439		chr10	60751624	61001624
chr10	98278365	98725180		chr10	62751624	63001624
chr10	99385873	99933004		chr10	65251624	65751624
chr10	100702391	100702757		chr10	68001624	68501624
chr10	100924612	101148970		chr10	69001624	70251624
chr10	102301519	102421241		chr10	89114055	89516828
chr10	105976265	106085217		chr10	93370276	94185185
chr10	107470537	107646719		chr10	94768221	95129123
chr10	107820917	108728069		chr10	95647730	96116677
chr10	109127968	109127994		chr10	99056647	99166411
chr10	110092660	110174532		chr10	101717110	101833317
chr10	112387390	112387426		chr10	103398692	103775994
chr10	113698882	113785289		chr10	104155641	104534577
chr10	114044288	114130434		chr10	109527460	109768729
chr10	114992349	115425466		chr10	118579651	118656826
chr10	116123431	116123468		chr10	118962493	119257410
chr10	116386415	116736807		chr10	119402241	119543737
chr10	120609175	120734278		chr10	119753276	119821411
chr10	121801793	122079506		chr10	122618388	122724348
chr10	122351347	122511872		chr10	128826912	128881468
chr10	123253192	123466597		chr10	130899119	130958640
chr10	125633882	125754968		chr10	131273138	131293144
chr10	129977456	130365910		chr10	131467315	131536246
chr10	130721908	130734970		chr10	131666179	131722927
chr10	131149581	131183566		chr10	132255835	132266191
chr10	131958555	131999107		chr10	132428720	132439687
chr10	132084453	132112212		chr10	133365689	133375171
chr10	132177468	132206248		chr10	133607725	133646180
chr10	132362448	132395554		chr10	133758171	133844487
chr10	132585361	132594931		chr10	134347678	134360317
chr10	132651711	132717747		chr10	134385570	134397565
chr10	132765577	132804150		chr10	135360029	135403434
chr10	132833089	132842702		chr12	74718369	75345275
chr10	132937730	132946968		chr12	86718369	87235208
chr10	133095029	133154956		chr12	87874960	89374960
chr10	133222897	133240245		chr12	103968369	104485208
chr10	133292947	133338037		chr12	123235208	125718369
chr10	133484330	133505514		chr14	24479192	25005562
chr10	133537875	133583793		chr14	36530059	36731948
chr10	134500087	134521599		chr14	100005562	101155531
chr10	134606134	134775954		chr15	59158776	61064897
chr10	135049813	135088323		chr15	63075724	65325724
chr10	135174997	135263290		chr15	93825724	94613821
chr11	129965236	130822273		chr17	46744	5080766
chr12	2595275	5595275		chr17	21292636	23563755
chr12	106735208	106845275		chr17	34042636	36313755
chr12	118845275	119374960		chr17	59563755	61792636
chr12	119718369	120345275		chr18	44993047	46352274
chr12	129235208	130735208		chr19	15791615	16467031
chr14	94979192	95030059		chr2	114856289	115753132
chr14	105479192	106280059		chr2	127606289	127753132
chr16	4903897	5640834		chr2	143612636	145606289
chr18	74993047	75348822		chr2	225856289	227503132
chr18	77598822	78077248		chr2	231106289	235606289
chr19	58923262	59128983		chr20	51421042	52921042
chr2	241606289	243092473		chr21	27271878	28771878
chr4	164170634	164663886		chr21	37796315	39271878
chr4	184974917	185117959		chr3	9193427	9248583
chr4	186643351	186644386		chr3	9943427	11498583
chr4	186686298	186753824		chr3	31575307	32498583
chr4	187184160	187294569		chr3	52017129	53498583
chr4	187298494	187345406		chr3	54998583	56498583
chr4	187349097	187387977		chr3	82693427	84267129
chr4	187426238	187553357		chr3	122443427	123267129
chr4	187613528	187724497		chr3	150943427	150998583
chr4	187796454	187835824		chr3	156943427	157748583
chr4	187983766	188068460		chr3	169767129	170517129
chr4	188493882	188668784		chr3	195886262	196555641
chr4	188836905	188924937		chr4	20414	2533249
chr4	189434901	189485914		chr4	31863966	32046053
chr4	189591062	189642719		chr4	128792112	130276831
chr4	189653341	189738302		chr5	10247944	11050894
chr4	189842882	189978864		chr5	116698829	117497944
chr4	190068325	190113054		chr5	140747944	142198829
chr4	190183346	190260489		chr5	142247944	143050894
chr4	190265816	190455457		chr5	152402389	153550894
chr4	190496381	190814076		chr5	159448829	161747944
chr4	190962803	191036914		chr6	152516844	154100529
chr5	174550894	176050894		chr6	157442929	159887131
chr7	148438669	148677101		chr7	38427101	40438669
chr7	149188669	149468491		chr7	111177101	112677101
chr8	133276169	133942727		chr7	149938669	152313318
chr9	139683715	140732583		chr8	8776169	9442727
				chr8	17776169	18526169
				chr8	87526169	88008291
				chr8	130758291	131692727
				chr8	131776169	132442727
				chr8	139942727	140776169
				chr8	145008291	146364022
				chr9	102482583	102933715
				chr9	103871278	104823607
				chr9	118683715	119732583
				chr9	126482583	127982583
				chr9	128732583	130232583
				chrX	2737197	10299069

## Sheet: 4q and 10q interactions
Specific and common interactions between 4q and 10q in CN					Specific and common interactions between 4q and 10q in FSHD1
Chr	Start	End	Annotation		Chr	Start	End	Annotation
chr1	4054661	7787096	Interactions specific for the 4q-D4Z4		chr1	19037096	20554661	Interactions specific for the 4q-D4Z4
chr1	10037096	10104558	Interactions specific for the 4q-D4Z4		chr1	46804661	48304661	Interactions specific for the 4q-D4Z4
chr1	13037096	15304661	Interactions specific for the 4q-D4Z4		chr1	164537096	165304661	Interactions specific for the 4q-D4Z4
chr1	18287096	19054661	Interactions specific for the 4q-D4Z4		chr1	166787096	166804661	Interactions specific for the 4q-D4Z4
chr1	39761566	40054661	Interactions specific for the 4q-D4Z4		chr1	211054661	212537096	Interactions specific for the 4q-D4Z4
chr1	88037096	90287096	Interactions specific for the 4q-D4Z4		chr1	212554661	215554661	Interactions specific for the 4q-D4Z4
chr1	141304661	142787096	Interactions specific for the 4q-D4Z4		chr1	223804661	225287096	Interactions specific for the 4q-D4Z4
chr1	171287096	172054661	Interactions specific for the 4q-D4Z4		chr1	229054661	229104558	Interactions specific for the 4q-D4Z4
chr1	217787096	221554661	Interactions specific for the 4q-D4Z4		chr1	232787096	236604558	Interactions specific for the 4q-D4Z4
chr1	232804661	240304661	Interactions specific for the 4q-D4Z4		chr1	239537096	241104558	Interactions specific for the 4q-D4Z4
chr1	244854558	249250621	Interactions specific for the 4q-D4Z4		chr10	122741188	122806351	Interactions specific for the 4q-D4Z4
chr10	53006838	53756838	Interactions specific for the 4q-D4Z4		chr10	131477885	131501557	Interactions specific for the 4q-D4Z4
chr10	127210211	127534670	Interactions specific for the 4q-D4Z4		chr10	133761866	134179421	Interactions specific for the 4q-D4Z4
chr10	127755382	127782642	Interactions specific for the 4q-D4Z4		chr10	135479578	135534747	Interactions specific for the 4q-D4Z4
chr10	130369625	130632824	Interactions specific for the 4q-D4Z4		chr11	5264737	7537653	Interactions specific for the 4q-D4Z4
chr10	135479192	135534747	Interactions specific for the 4q-D4Z4		chr11	31222200	31537653	Interactions specific for the 4q-D4Z4
chr11	59287653	59375981	Interactions specific for the 4q-D4Z4		chr11	33764737	35264737	Interactions specific for the 4q-D4Z4
chr11	70537653	72764737	Interactions specific for the 4q-D4Z4		chr11	73222200	74375981	Interactions specific for the 4q-D4Z4
chr11	112537653	114764737	Interactions specific for the 4q-D4Z4		chr11	108875981	111125981	Interactions specific for the 4q-D4Z4
chr11	114787653	116287653	Interactions specific for the 4q-D4Z4		chr11	113287653	114764737	Interactions specific for the 4q-D4Z4
chr11	133514737	135006516	Interactions specific for the 4q-D4Z4		chr11	117764737	118537653	Interactions specific for the 4q-D4Z4
chr12	69936875	72186875	Interactions specific for the 4q-D4Z4		chr12	74436875	77412185	Interactions specific for the 4q-D4Z4
chr12	92436875	93912185	Interactions specific for the 4q-D4Z4		chr12	93936875	96162185	Interactions specific for the 4q-D4Z4
chr12	101436875	102162185	Interactions specific for the 4q-D4Z4		chr12	100095346	100941353	Interactions specific for the 4q-D4Z4
chr12	102912185	103095346	Interactions specific for the 4q-D4Z4		chr12	109845346	111162185	Interactions specific for the 4q-D4Z4
chr12	107691353	108186875	Interactions specific for the 4q-D4Z4		chr12	111936875	112662185	Interactions specific for the 4q-D4Z4
chr12	111912185	112845346	Interactions specific for the 4q-D4Z4		chr12	124941353	126345346	Interactions specific for the 4q-D4Z4
chr12	132936875	133851895	Interactions specific for the 4q-D4Z4		chr13	22399672	23149672	Interactions specific for the 4q-D4Z4
chr13	25623156	27205006	Interactions specific for the 4q-D4Z4		chr13	54649672	54955006	Interactions specific for the 4q-D4Z4
chr13	36205006	37093864	Interactions specific for the 4q-D4Z4		chr13	76399672	77373156	Interactions specific for the 4q-D4Z4
chr13	96123156	97705006	Interactions specific for the 4q-D4Z4		chr13	97623156	98373156	Interactions specific for the 4q-D4Z4
chr13	107593864	108955006	Interactions specific for the 4q-D4Z4		chr13	99649672	100843864	Interactions specific for the 4q-D4Z4
chr13	113899672	114343864	Interactions specific for the 4q-D4Z4		chr13	105649672	105955006	Interactions specific for the 4q-D4Z4
chr14	59709770	60520857	Interactions specific for the 4q-D4Z4		chr13	106705006	107455006	Interactions specific for the 4q-D4Z4
chr14	71709770	72459770	Interactions specific for the 4q-D4Z4		chr13	108205006	110899672	Interactions specific for the 4q-D4Z4
chr14	77627377	80020857	Interactions specific for the 4q-D4Z4		chr14	74709770	75459770	Interactions specific for the 4q-D4Z4
chr14	81377377	83770857	Interactions specific for the 4q-D4Z4		chr14	79127377	79209770	Interactions specific for the 4q-D4Z4
chr14	84377377	84520857	Interactions specific for the 4q-D4Z4		chr14	79877377	81459770	Interactions specific for the 4q-D4Z4
chr14	93459770	94959770	Interactions specific for the 4q-D4Z4		chr14	97209770	99377377	Interactions specific for the 4q-D4Z4
chr15	51410644	52371850	Interactions specific for the 4q-D4Z4		chr15	95660644	95811242	Interactions specific for the 4q-D4Z4
chr15	68061242	69114903	Interactions specific for the 4q-D4Z4		chr16	32459262	33884454	Interactions specific for the 4q-D4Z4
chr15	80061242	82311242	Interactions specific for the 4q-D4Z4		chr16	69959262	70902891	Interactions specific for the 4q-D4Z4
chr15	90410644	92121850	Interactions specific for the 4q-D4Z4		chr16	75959262	77384454	Interactions specific for the 4q-D4Z4
chr15	95660644	95811242	Interactions specific for the 4q-D4Z4		chr17	76908330	77658330	Interactions specific for the 4q-D4Z4
chr15	96410644	97614903	Interactions specific for the 4q-D4Z4		chr18	21143019	22706082	Interactions specific for the 4q-D4Z4
chr15	100910644	102531392	Interactions specific for the 4q-D4Z4		chr18	38393019	39206082	Interactions specific for the 4q-D4Z4
chr17	13901132	14061239	Interactions specific for the 4q-D4Z4		chr18	39893019	39956082	Interactions specific for the 4q-D4Z4
chr17	69835298	71811239	Interactions specific for the 4q-D4Z4		chr19	43987948	44174397	Interactions specific for the 4q-D4Z4
chr17	73585298	75408330	Interactions specific for the 4q-D4Z4		chr2	6051565	6801565	Interactions specific for the 4q-D4Z4
chr17	79908330	81195210	Interactions specific for the 4q-D4Z4		chr2	14205032	14301565	Interactions specific for the 4q-D4Z4
chr18	44786	10867378	Interactions specific for the 4q-D4Z4		chr2	17205032	18801565	Interactions specific for the 4q-D4Z4
chr18	27956082	29459031	Interactions specific for the 4q-D4Z4		chr2	41955032	44189074	Interactions specific for the 4q-D4Z4
chr18	33893019	33956082	Interactions specific for the 4q-D4Z4		chr2	53205032	53301565	Interactions specific for the 4q-D4Z4
chr18	70643019	71456082	Interactions specific for the 4q-D4Z4		chr2	103455032	104939074	Interactions specific for the 4q-D4Z4
chr19	66103	8174397	Interactions specific for the 4q-D4Z4		chr2	113205032	115551565	Interactions specific for the 4q-D4Z4
chr19	35147424	36674397	Interactions specific for the 4q-D4Z4		chr2	196455032	197955032	Interactions specific for the 4q-D4Z4
chr2	15303	2892008	Interactions specific for the 4q-D4Z4		chr2	204705032	205551565	Interactions specific for the 4q-D4Z4
chr2	4439074	6051565	Interactions specific for the 4q-D4Z4		chr2	206955032	207051565	Interactions specific for the 4q-D4Z4
chr2	6999851	9051565	Interactions specific for the 4q-D4Z4		chr2	216705032	218205032	Interactions specific for the 4q-D4Z4
chr2	21689074	22439074	Interactions specific for the 4q-D4Z4		chr2	221939074	223551565	Interactions specific for the 4q-D4Z4
chr2	35205032	35301565	Interactions specific for the 4q-D4Z4		chr2	228249851	231689074	Interactions specific for the 4q-D4Z4
chr2	35955032	36801565	Interactions specific for the 4q-D4Z4		chr2	233955032	236189074	Interactions specific for the 4q-D4Z4
chr2	90999851	93689074	Interactions specific for the 4q-D4Z4		chr2	239205032	241551565	Interactions specific for the 4q-D4Z4
chr2	194955032	195801565	Interactions specific for the 4q-D4Z4		chr20	7133668	8234987	Interactions specific for the 4q-D4Z4
chr2	208455032	209955032	Interactions specific for the 4q-D4Z4		chr21	9466314	17192285	Interactions specific for the 4q-D4Z4
chr2	212955032	213051565	Interactions specific for the 4q-D4Z4		chr22	26921984	28421984	Interactions specific for the 4q-D4Z4
chr2	213249851	215301565	Interactions specific for the 4q-D4Z4		chr3	63689	3852359	Interactions specific for the 4q-D4Z4
chr2	220455032	222705032	Interactions specific for the 4q-D4Z4		chr3	6062213	6102359	Interactions specific for the 4q-D4Z4
chr20	119107	6418509	Interactions specific for the 4q-D4Z4		chr3	6852359	8352359	Interactions specific for the 4q-D4Z4
chr21	9466314	17061646	Interactions specific for the 4q-D4Z4		chr3	17312213	17352359	Interactions specific for the 4q-D4Z4
chr22	16058515	24671984	Interactions specific for the 4q-D4Z4		chr3	153062213	153139503	Interactions specific for the 4q-D4Z4
chr22	29171984	29277708	Interactions specific for the 4q-D4Z4		chr3	154562213	155352359	Interactions specific for the 4q-D4Z4
chr22	36957440	37421984	Interactions specific for the 4q-D4Z4		chr3	159102359	159852359	Interactions specific for the 4q-D4Z4
chr3	63689	4602359	Interactions specific for the 4q-D4Z4		chr4	4112748	4362748	Interactions specific for the 4q-D4Z4
chr3	6102359	6139503	Interactions specific for the 4q-D4Z4		chr4	5112748	5862748	Interactions specific for the 4q-D4Z4
chr3	6852359	8389503	Interactions specific for the 4q-D4Z4		chr4	7112748	7612748	Interactions specific for the 4q-D4Z4
chr3	27665257	29165257	Interactions specific for the 4q-D4Z4		chr4	9362748	9862748	Interactions specific for the 4q-D4Z4
chr3	168812213	169602359	Interactions specific for the 4q-D4Z4		chr4	13612748	14112748	Interactions specific for the 4q-D4Z4
chr3	178562213	179352359	Interactions specific for the 4q-D4Z4		chr4	19612748	19862748	Interactions specific for the 4q-D4Z4
chr3	180062213	181602359	Interactions specific for the 4q-D4Z4		chr4	20362748	20862748	Interactions specific for the 4q-D4Z4
chr3	191915257	192852359	Interactions specific for the 4q-D4Z4		chr4	22362748	22612748	Interactions specific for the 4q-D4Z4
chr3	193562213	195102359	Interactions specific for the 4q-D4Z4		chr4	24362748	24612748	Interactions specific for the 4q-D4Z4
chr4	8112748	8862748	Interactions specific for the 4q-D4Z4		chr4	32362748	32612748	Interactions specific for the 4q-D4Z4
chr4	10612748	10862748	Interactions specific for the 4q-D4Z4		chr4	56612748	56862748	Interactions specific for the 4q-D4Z4
chr4	14862748	15112748	Interactions specific for the 4q-D4Z4		chr4	84862748	85112748	Interactions specific for the 4q-D4Z4
chr4	15612748	16362748	Interactions specific for the 4q-D4Z4		chr4	87862748	88112748	Interactions specific for the 4q-D4Z4
chr4	17362748	17612748	Interactions specific for the 4q-D4Z4		chr4	102862748	103612748	Interactions specific for the 4q-D4Z4
chr4	24112748	24612748	Interactions specific for the 4q-D4Z4		chr4	104112748	105112748	Interactions specific for the 4q-D4Z4
chr4	29112748	29362748	Interactions specific for the 4q-D4Z4		chr4	105612748	106112748	Interactions specific for the 4q-D4Z4
chr4	53862748	54112748	Interactions specific for the 4q-D4Z4		chr4	107112748	107362748	Interactions specific for the 4q-D4Z4
chr4	69112748	69362748	Interactions specific for the 4q-D4Z4		chr4	110362748	110612748	Interactions specific for the 4q-D4Z4
chr4	75612748	75862748	Interactions specific for the 4q-D4Z4		chr4	111362748	111862748	Interactions specific for the 4q-D4Z4
chr4	91612748	92112748	Interactions specific for the 4q-D4Z4		chr4	113112748	113362748	Interactions specific for the 4q-D4Z4
chr4	93112748	93862748	Interactions specific for the 4q-D4Z4		chr4	114112748	115362748	Interactions specific for the 4q-D4Z4
chr4	104362748	104612748	Interactions specific for the 4q-D4Z4		chr4	119112748	120612748	Interactions specific for the 4q-D4Z4
chr4	114862748	116362748	Interactions specific for the 4q-D4Z4		chr4	121612748	122112748	Interactions specific for the 4q-D4Z4
chr4	119112748	119612748	Interactions specific for the 4q-D4Z4		chr4	122862748	123362748	Interactions specific for the 4q-D4Z4
chr4	120612748	121862748	Interactions specific for the 4q-D4Z4		chr4	124612748	124862748	Interactions specific for the 4q-D4Z4
chr4	122612748	122862748	Interactions specific for the 4q-D4Z4		chr4	125612748	126112748	Interactions specific for the 4q-D4Z4
chr4	125362748	125862748	Interactions specific for the 4q-D4Z4		chr4	127612748	128862748	Interactions specific for the 4q-D4Z4
chr4	130862748	131112748	Interactions specific for the 4q-D4Z4		chr4	129862748	130112748	Interactions specific for the 4q-D4Z4
chr4	132112748	136862748	Interactions specific for the 4q-D4Z4		chr4	130612748	131612748	Interactions specific for the 4q-D4Z4
chr4	137612748	137862748	Interactions specific for the 4q-D4Z4		chr4	132362748	134362748	Interactions specific for the 4q-D4Z4
chr4	138362748	138862748	Interactions specific for the 4q-D4Z4		chr4	134862748	135362748	Interactions specific for the 4q-D4Z4
chr4	139362748	139612748	Interactions specific for the 4q-D4Z4		chr4	174633734	175922792	Interactions specific for the 4q-D4Z4
chr4	140112748	153487403	Interactions specific for the 4q-D4Z4		chr4	179054215	181163393	Interactions specific for the 4q-D4Z4
chr4	177784775	180150515	Interactions specific for the 4q-D4Z4		chr4	181450368	181656038	Interactions specific for the 4q-D4Z4
chr4	180395002	180788020	Interactions specific for the 4q-D4Z4		chr4	187966486	187977486	Interactions specific for the 4q-D4Z4
chr4	181016342	182998165	Interactions specific for the 4q-D4Z4		chr4	189168131	189173721	Interactions specific for the 4q-D4Z4
chr4	183164485	183696857	Interactions specific for the 4q-D4Z4		chr4	189270618	189282157	Interactions specific for the 4q-D4Z4
chr4	183800095	183952042	Interactions specific for the 4q-D4Z4		chr4	189748630	189753297	Interactions specific for the 4q-D4Z4
chr4	185679369	186160377	Interactions specific for the 4q-D4Z4		chr4	190134153	190138406	Interactions specific for the 4q-D4Z4
chr4	186182656	186205615	Interactions specific for the 4q-D4Z4		chr4	190847075	190857213	Interactions specific for the 4q-D4Z4
chr4	186317908	186325973	Interactions specific for the 4q-D4Z4		chr4	190863985	190901834	Interactions specific for the 4q-D4Z4
chr4	188722658	188727658	Interactions specific for the 4q-D4Z4		chr4	190908843	190912388	Interactions specific for the 4q-D4Z4
chr4	188772470	188777411	Interactions specific for the 4q-D4Z4		chr4	190919479	190952239	Interactions specific for the 4q-D4Z4
chr4	189146033	189151548	Interactions specific for the 4q-D4Z4		chr5	133536679	135349744	Interactions specific for the 4q-D4Z4
chr4	189218902	189218913	Interactions specific for the 4q-D4Z4		chr5	145536679	146394894	Interactions specific for the 4q-D4Z4
chr4	189270618	189310994	Interactions specific for the 4q-D4Z4		chr5	151536679	152599744	Interactions specific for the 4q-D4Z4
chr4	189379637	189385269	Interactions specific for the 4q-D4Z4		chr5	154644894	156786679	Interactions specific for the 4q-D4Z4
chr4	190863985	190901834	Interactions specific for the 4q-D4Z4		chr5	162144894	163536679	Interactions specific for the 4q-D4Z4
chr4	190908843	190912388	Interactions specific for the 4q-D4Z4		chr5	164394894	165036679	Interactions specific for the 4q-D4Z4
chr4	190919479	190930266	Interactions specific for the 4q-D4Z4		chr6	119702	4563046	Interactions specific for the 4q-D4Z4
chr4	190937510	190952239	Interactions specific for the 4q-D4Z4		chr6	90793333	91563046	Interactions specific for the 4q-D4Z4
chr5	17394894	19269547	Interactions specific for the 4q-D4Z4		chr6	153043333	155313046	Interactions specific for the 4q-D4Z4
chr5	33786679	35769547	Interactions specific for the 4q-D4Z4		chr6	156043333	157563046	Interactions specific for the 4q-D4Z4
chr5	132786679	132894894	Interactions specific for the 4q-D4Z4		chr6	158282002	159063046	Interactions specific for the 4q-D4Z4
chr5	133099744	134394894	Interactions specific for the 4q-D4Z4		chr6	159782002	162043333	Interactions specific for the 4q-D4Z4
chr5	164599744	165894894	Interactions specific for the 4q-D4Z4		chr6	165043333	165813046	Interactions specific for the 4q-D4Z4
chr5	168519547	170394894	Interactions specific for the 4q-D4Z4		chr7	6135241	6254423	Interactions specific for the 4q-D4Z4
chr5	172269547	172644894	Interactions specific for the 4q-D4Z4		chr7	130261820	131672982	Interactions specific for the 4q-D4Z4
chr5	177144894	180786679	Interactions specific for the 4q-D4Z4		chr7	136726158	136922982	Interactions specific for the 4q-D4Z4
chr6	119702	5985765	Interactions specific for the 4q-D4Z4		chr7	138976158	139172982	Interactions specific for the 4q-D4Z4
chr6	72793333	72813046	Interactions specific for the 4q-D4Z4		chr7	141976158	142726158	Interactions specific for the 4q-D4Z4
chr6	73543333	74313046	Interactions specific for the 4q-D4Z4		chr8	46948	3602912	Interactions specific for the 4q-D4Z4
chr6	75043333	75063046	Interactions specific for the 4q-D4Z4		chr8	16352912	16874010	Interactions specific for the 4q-D4Z4
chr6	105793333	106563046	Interactions specific for the 4q-D4Z4		chr8	81602912	83102912	Interactions specific for the 4q-D4Z4
chr6	120793333	121563046	Interactions specific for the 4q-D4Z4		chr8	106851875	106874010	Interactions specific for the 4q-D4Z4
chr6	129813046	131313046	Interactions specific for the 4q-D4Z4		chr8	115101875	121101875	Interactions specific for the 4q-D4Z4
chr6	140293333	141063046	Interactions specific for the 4q-D4Z4		chr8	127101875	129374010	Interactions specific for the 4q-D4Z4
chr6	148543333	149313046	Interactions specific for the 4q-D4Z4		chr8	141934013	142874010	Interactions specific for the 4q-D4Z4
chr6	155293333	155313046	Interactions specific for the 4q-D4Z4		chr8	145101875	146364022	Interactions specific for the 4q-D4Z4
chr6	161293333	162793333	Interactions specific for the 4q-D4Z4		chr9	105633808	106468708	Interactions specific for the 4q-D4Z4
chr6	165043333	171115067	Interactions specific for the 4q-D4Z4		chr9	107038858	107883808	Interactions specific for the 4q-D4Z4
chr7	16058	4172982	Interactions specific for the 4q-D4Z4		chr9	110038858	111633808	Interactions specific for the 4q-D4Z4
chr7	93135241	93422982	Interactions specific for the 4q-D4Z4		chr9	126718708	127288858	Interactions specific for the 4q-D4Z4
chr7	98476158	100172982	Interactions specific for the 4q-D4Z4		chrX	2737197	7267985	Interactions specific for the 4q-D4Z4
chr7	125761820	127172982	Interactions specific for the 4q-D4Z4		chrX	18919443	18966798	Interactions specific for the 4q-D4Z4
chr7	141885241	142635241	Interactions specific for the 4q-D4Z4		chrX	137932823	139267985	Interactions specific for the 4q-D4Z4
chr8	46948	5201073	Interactions specific for the 4q-D4Z4		chrX	151432823	151716798	Interactions specific for the 4q-D4Z4
chr8	19684013	19851875	Interactions specific for the 4q-D4Z4		chrX	153169443	153517985	Interactions specific for the 4q-D4Z4
chr8	86601875	87351875	Interactions specific for the 4q-D4Z4		chr1	8844952	10442006	Interactions specific for the 10q-D4Z4
chr8	88684013	88851875	Interactions specific for the 4q-D4Z4		chr1	37442006	38942006	Interactions specific for the 10q-D4Z4
chr8	98601875	99351875	Interactions specific for the 4q-D4Z4		chr1	173844952	173942006	Interactions specific for the 10q-D4Z4
chr8	106684013	108351875	Interactions specific for the 4q-D4Z4		chr1	199344952	200192006	Interactions specific for the 10q-D4Z4
chr8	120351875	121101875	Interactions specific for the 4q-D4Z4		chr1	228411933	228594952	Interactions specific for the 10q-D4Z4
chr8	123351875	124874010	Interactions specific for the 4q-D4Z4		chr10	6751624	7001624	Interactions specific for the 10q-D4Z4
chr8	127684013	130101875	Interactions specific for the 4q-D4Z4		chr10	7751624	8001624	Interactions specific for the 10q-D4Z4
chr8	136101875	136352912	Interactions specific for the 4q-D4Z4		chr10	27001624	27751624	Interactions specific for the 10q-D4Z4
chr9	20218708	20883808	Interactions specific for the 4q-D4Z4		chr10	47001624	47251624	Interactions specific for the 10q-D4Z4
chr9	25383808	26038858	Interactions specific for the 4q-D4Z4		chr10	52501624	53001624	Interactions specific for the 10q-D4Z4
chr9	67288858	70886737	Interactions specific for the 4q-D4Z4		chr10	70751624	71251624	Interactions specific for the 10q-D4Z4
chr9	86968708	89133808	Interactions specific for the 4q-D4Z4		chr10	73501624	73751624	Interactions specific for the 10q-D4Z4
chr9	124288858	125218708	Interactions specific for the 4q-D4Z4		chr10	80501624	80751624	Interactions specific for the 10q-D4Z4
chrX	15216798	16267985	Interactions specific for the 4q-D4Z4		chr10	81980712	84476538	Interactions specific for the 10q-D4Z4
chrX	17182823	17767985	Interactions specific for the 4q-D4Z4		chr10	86608418	87812365	Interactions specific for the 10q-D4Z4
chrX	119017985	120919443	Interactions specific for the 4q-D4Z4		chr10	90778085	90778970	Interactions specific for the 10q-D4Z4
chrX	125466798	126169443	Interactions specific for the 4q-D4Z4		chr10	94188886	94574847	Interactions specific for the 10q-D4Z4
chrX	135517985	136432823	Interactions specific for the 4q-D4Z4		chr10	95309682	95476472	Interactions specific for the 10q-D4Z4
chrX	137017985	137419443	Interactions specific for the 4q-D4Z4		chr10	102301519	102782622	Interactions specific for the 10q-D4Z4
chr1	11844952	12692006	Interactions specific for the 10q-D4Z4		chr10	108888442	109207810	Interactions specific for the 10q-D4Z4
chr1	24008304	26192006	Interactions specific for the 10q-D4Z4		chr10	110092660	110174532	Interactions specific for the 10q-D4Z4
chr1	36594952	38258304	Interactions specific for the 10q-D4Z4		chr10	121222414	121281514	Interactions specific for the 10q-D4Z4
chr1	46442006	47942006	Interactions specific for the 10q-D4Z4		chr10	126490848	126490867	Interactions specific for the 10q-D4Z4
chr1	81758304	83192006	Interactions specific for the 10q-D4Z4		chr10	131723525	131774861	Interactions specific for the 10q-D4Z4
chr1	201008304	202161933	Interactions specific for the 10q-D4Z4		chr11	117064	3272746	Interactions specific for the 10q-D4Z4
chr1	221844952	222692006	Interactions specific for the 10q-D4Z4		chr11	124022746	125522746	Interactions specific for the 10q-D4Z4
chr1	230094952	231411933	Interactions specific for the 10q-D4Z4		chr12	51235208	51468369	Interactions specific for the 10q-D4Z4
chr10	2501624	2751624	Interactions specific for the 10q-D4Z4		chr12	104595275	105874960	Interactions specific for the 10q-D4Z4
chr10	12501624	12751624	Interactions specific for the 10q-D4Z4		chr12	106735208	106845275	Interactions specific for the 10q-D4Z4
chr10	34251624	34501624	Interactions specific for the 10q-D4Z4		chr12	117985208	119374960	Interactions specific for the 10q-D4Z4
chr10	45501624	46001624	Interactions specific for the 10q-D4Z4		chr12	119718369	120468369	Interactions specific for the 10q-D4Z4
chr10	54001624	54251624	Interactions specific for the 10q-D4Z4		chr13	66292858	67753685	Interactions specific for the 10q-D4Z4
chr10	60751624	61001624	Interactions specific for the 10q-D4Z4		chr13	103753685	103792858	Interactions specific for the 10q-D4Z4
chr10	62751624	63001624	Interactions specific for the 10q-D4Z4		chr14	32505562	34229192	Interactions specific for the 10q-D4Z4
chr10	65251624	65751624	Interactions specific for the 10q-D4Z4		chr15	80908776	82575724	Interactions specific for the 10q-D4Z4
chr10	68001624	68501624	Interactions specific for the 10q-D4Z4		chr15	84075724	84314897	Interactions specific for the 10q-D4Z4
chr10	69001624	70251624	Interactions specific for the 10q-D4Z4		chr15	84863821	86363821	Interactions specific for the 10q-D4Z4
chr10	72501624	74251624	Interactions specific for the 10q-D4Z4		chr15	87075724	87113821	Interactions specific for the 10q-D4Z4
chr10	80501624	80751624	Interactions specific for the 10q-D4Z4		chr15	88408776	88575724	Interactions specific for the 10q-D4Z4
chr10	81980712	83699619	Interactions specific for the 10q-D4Z4		chr15	91613821	93075724	Interactions specific for the 10q-D4Z4
chr10	89114055	89516828	Interactions specific for the 10q-D4Z4		chr16	4903897	6018914	Interactions specific for the 10q-D4Z4
chr10	91431858	92085110	Interactions specific for the 10q-D4Z4		chr16	13153897	14640834	Interactions specific for the 10q-D4Z4
chr10	93370276	94185185	Interactions specific for the 10q-D4Z4		chr16	19153897	21390834	Interactions specific for the 10q-D4Z4
chr10	94768221	95129123	Interactions specific for the 10q-D4Z4		chr16	89653897	90354753	Interactions specific for the 10q-D4Z4
chr10	95647730	96116677	Interactions specific for the 10q-D4Z4		chr17	49813755	51313755	Interactions specific for the 10q-D4Z4
chr10	96556086	97700762	Interactions specific for the 10q-D4Z4		chr17	70063755	71563755	Interactions specific for the 10q-D4Z4
chr10	98278365	98725180	Interactions specific for the 10q-D4Z4		chr18	10098822	10781844	Interactions specific for the 10q-D4Z4
chr10	99056647	99166411	Interactions specific for the 10q-D4Z4		chr18	74993047	76352274	Interactions specific for the 10q-D4Z4
chr10	99385873	99933004	Interactions specific for the 10q-D4Z4		chr18	77598822	78077248	Interactions specific for the 10q-D4Z4
chr10	100151890	101488533	Interactions specific for the 10q-D4Z4		chr19	53673262	55173262	Interactions specific for the 10q-D4Z4
chr10	101717110	101833317	Interactions specific for the 10q-D4Z4		chr2	14356289	15092473	Interactions specific for the 10q-D4Z4
chr10	102065699	102421241	Interactions specific for the 10q-D4Z4		chr20	119107	5222978	Interactions specific for the 10q-D4Z4
chr10	103398692	103775994	Interactions specific for the 10q-D4Z4		chr20	10153160	11653160	Interactions specific for the 10q-D4Z4
chr10	104155641	104534577	Interactions specific for the 10q-D4Z4		chr20	37903160	38671042	Interactions specific for the 10q-D4Z4
chr10	105976265	106085217	Interactions specific for the 10q-D4Z4		chr20	48403160	48421042	Interactions specific for the 10q-D4Z4
chr10	109127968	109127994	Interactions specific for the 10q-D4Z4		chr21	42271878	44546315	Interactions specific for the 10q-D4Z4
chr10	109527460	109768729	Interactions specific for the 10q-D4Z4		chr21	47546315	48129895	Interactions specific for the 10q-D4Z4
chr10	110092660	110338534	Interactions specific for the 10q-D4Z4		chr3	19693427	19748583	Interactions specific for the 10q-D4Z4
chr10	112387390	112563065	Interactions specific for the 10q-D4Z4		chr3	20498583	21075307	Interactions specific for the 10q-D4Z4
chr10	116123431	116736807	Interactions specific for the 10q-D4Z4		chr3	44443427	44498583	Interactions specific for the 10q-D4Z4
chr10	118579651	118656826	Interactions specific for the 10q-D4Z4		chr3	46693427	46748583	Interactions specific for the 10q-D4Z4
chr10	118962493	119257410	Interactions specific for the 10q-D4Z4		chr3	156193427	156267129	Interactions specific for the 10q-D4Z4
chr10	119753276	119821411	Interactions specific for the 10q-D4Z4		chr3	178748583	180248583	Interactions specific for the 10q-D4Z4
chr10	120609175	120734278	Interactions specific for the 10q-D4Z4		chr4	34863966	35776831	Interactions specific for the 10q-D4Z4
chr10	121801793	122079506	Interactions specific for the 10q-D4Z4		chr4	190962803	191073176	Interactions specific for the 10q-D4Z4
chr10	123253192	123466597	Interactions specific for the 10q-D4Z4		chr5	8698829	8747944	Interactions specific for the 10q-D4Z4
chr10	128826912	128881468	Interactions specific for the 10q-D4Z4		chr6	4766844	5516844	Interactions specific for the 10q-D4Z4
chr10	130696261	130734970	Interactions specific for the 10q-D4Z4		chr6	37766844	40100529	Interactions specific for the 10q-D4Z4
chr10	130899119	130958640	Interactions specific for the 10q-D4Z4		chr6	139100529	140600529	Interactions specific for the 10q-D4Z4
chr10	131149581	131183566	Interactions specific for the 10q-D4Z4		chr8	7192727	8776169	Interactions specific for the 10q-D4Z4
chr10	131273138	131293144	Interactions specific for the 10q-D4Z4		chr8	143508291	143776169	Interactions specific for the 10q-D4Z4
chr10	131467315	131536246	Interactions specific for the 10q-D4Z4		chr9	32732583	34232583	Interactions specific for the 10q-D4Z4
chr10	131666179	131722927	Interactions specific for the 10q-D4Z4		chr9	67232583	69482583	Interactions specific for the 10q-D4Z4
chr10	132362448	132395554	Interactions specific for the 10q-D4Z4		chr9	116823607	118232583	Interactions specific for the 10q-D4Z4
chr10	132428720	132439687	Interactions specific for the 10q-D4Z4		chr9	121323607	123183715	Interactions specific for the 10q-D4Z4
chr10	132937730	132946968	Interactions specific for the 10q-D4Z4		chr9	134621278	136121278	Interactions specific for the 10q-D4Z4
chr10	133292947	133338037	Interactions specific for the 10q-D4Z4		chr9	137073607	137433715	Interactions specific for the 10q-D4Z4
chr10	133365689	133375171	Interactions specific for the 10q-D4Z4		chr9	139683715	140732583	Interactions specific for the 10q-D4Z4
chr10	133484330	133505514	Interactions specific for the 10q-D4Z4		chrX	28765676	30607846	Interactions specific for the 10q-D4Z4
chr10	133537875	133583793	Interactions specific for the 10q-D4Z4		chr1	1442006	3004466	Interactions common between 4q-D4Z4 and 10q-D4Z4
chr10	133607725	133646180	Interactions specific for the 10q-D4Z4		chr1	3411933	3756374	Interactions common between 4q-D4Z4 and 10q-D4Z4
chr10	133758171	133844487	Interactions specific for the 10q-D4Z4		chr1	4344952	5942006	Interactions common between 4q-D4Z4 and 10q-D4Z4
chr12	74718369	75345275	Interactions specific for the 10q-D4Z4		chr1	12594952	13911933	Interactions common between 4q-D4Z4 and 10q-D4Z4
chr12	86718369	87235208	Interactions specific for the 10q-D4Z4		chr1	241787096	243744648	Interactions common between 4q-D4Z4 and 10q-D4Z4
chr12	87874960	89374960	Interactions specific for the 10q-D4Z4		chr1	245192006	245942006	Interactions common between 4q-D4Z4 and 10q-D4Z4
chr12	103968369	104485208	Interactions specific for the 10q-D4Z4		chr1	246692006	246788512	Interactions common between 4q-D4Z4 and 10q-D4Z4
chr12	106095275	107485208	Interactions specific for the 10q-D4Z4		chr10	110427	618442	Interactions common between 4q-D4Z4 and 10q-D4Z4
chr14	36530059	36731948	Interactions specific for the 10q-D4Z4		chr10	1251624	2428696	Interactions common between 4q-D4Z4 and 10q-D4Z4
chr14	104030059	106280059	Interactions specific for the 10q-D4Z4		chr10	6001624	6251624	Interactions common between 4q-D4Z4 and 10q-D4Z4
chr15	59158776	61064897	Interactions specific for the 10q-D4Z4		chr10	13501624	14001624	Interactions common between 4q-D4Z4 and 10q-D4Z4
chr15	63075724	65325724	Interactions specific for the 10q-D4Z4		chr10	35251624	35501624	Interactions common between 4q-D4Z4 and 10q-D4Z4
chr16	89680	5640834	Interactions specific for the 10q-D4Z4		chr10	77251624	79045096	Interactions common between 4q-D4Z4 and 10q-D4Z4
chr17	21292636	23563755	Interactions specific for the 10q-D4Z4		chr10	91658123	92732274	Interactions common between 4q-D4Z4 and 10q-D4Z4
chr17	34042636	36313755	Interactions specific for the 10q-D4Z4		chr10	96693953	96825908	Interactions common between 4q-D4Z4 and 10q-D4Z4
chr17	59563755	61792636	Interactions specific for the 10q-D4Z4		chr10	97215913	97338439	Interactions common between 4q-D4Z4 and 10q-D4Z4
chr18	44993047	46352274	Interactions specific for the 10q-D4Z4		chr10	98376033	98946322	Interactions common between 4q-D4Z4 and 10q-D4Z4
chr18	72348822	75348822	Interactions specific for the 10q-D4Z4		chr10	99276280	100042486	Interactions common between 4q-D4Z4 and 10q-D4Z4
chr18	76781844	78077248	Interactions specific for the 10q-D4Z4		chr10	100702391	100702757	Interactions common between 4q-D4Z4 and 10q-D4Z4
chr19	15791615	16467031	Interactions specific for the 10q-D4Z4		chr10	100924612	101148970	Interactions common between 4q-D4Z4 and 10q-D4Z4
chr19	57791615	59128983	Interactions specific for the 10q-D4Z4		chr10	105936431	106549764	Interactions common between 4q-D4Z4 and 10q-D4Z4
chr2	127606289	127753132	Interactions specific for the 10q-D4Z4		chr10	106730522	106910839	Interactions common between 4q-D4Z4 and 10q-D4Z4
chr2	143612636	145606289	Interactions specific for the 10q-D4Z4		chr10	107289275	107646719	Interactions common between 4q-D4Z4 and 10q-D4Z4
chr2	225856289	227503132	Interactions specific for the 10q-D4Z4		chr10	107820917	108486284	Interactions common between 4q-D4Z4 and 10q-D4Z4
chr20	51421042	52921042	Interactions specific for the 10q-D4Z4		chr10	110420656	110586525	Interactions common between 4q-D4Z4 and 10q-D4Z4
chr21	27271878	28771878	Interactions specific for the 10q-D4Z4		chr10	110920725	110920996	Interactions common between 4q-D4Z4 and 10q-D4Z4
chr21	37796315	39271878	Interactions specific for the 10q-D4Z4		chr10	111174433	111259810	Interactions common between 4q-D4Z4 and 10q-D4Z4
chr3	9193427	9248583	Interactions specific for the 10q-D4Z4		chr10	111430574	111485452	Interactions common between 4q-D4Z4 and 10q-D4Z4
chr3	9943427	11498583	Interactions specific for the 10q-D4Z4		chr10	111512317	112387426	Interactions common between 4q-D4Z4 and 10q-D4Z4
chr3	31575307	32498583	Interactions specific for the 10q-D4Z4		chr10	112650951	112738748	Interactions common between 4q-D4Z4 and 10q-D4Z4
chr3	54998583	56498583	Interactions specific for the 10q-D4Z4		chr10	112914380	112960690	Interactions common between 4q-D4Z4 and 10q-D4Z4
chr3	82693427	84267129	Interactions specific for the 10q-D4Z4		chr10	113698882	113785289	Interactions common between 4q-D4Z4 and 10q-D4Z4
chr3	122443427	123267129	Interactions specific for the 10q-D4Z4		chr10	114044288	114120552	Interactions common between 4q-D4Z4 and 10q-D4Z4
chr3	150943427	150998583	Interactions specific for the 10q-D4Z4		chr10	114624821	115425466	Interactions common between 4q-D4Z4 and 10q-D4Z4
chr3	156943427	157748583	Interactions specific for the 10q-D4Z4		chr10	115773611	115773702	Interactions common between 4q-D4Z4 and 10q-D4Z4
chr3	169767129	170517129	Interactions specific for the 10q-D4Z4		chr10	115948356	116123468	Interactions common between 4q-D4Z4 and 10q-D4Z4
chr3	195886262	196555641	Interactions specific for the 10q-D4Z4		chr10	116386415	116736807	Interactions common between 4q-D4Z4 and 10q-D4Z4
chr4	20414	2533249	Interactions specific for the 10q-D4Z4		chr10	117601000	117935469	Interactions common between 4q-D4Z4 and 10q-D4Z4
chr4	31863966	32046053	Interactions specific for the 10q-D4Z4		chr10	118100392	118261913	Interactions common between 4q-D4Z4 and 10q-D4Z4
chr4	190962803	191036914	Interactions specific for the 10q-D4Z4		chr10	119544269	119683619	Interactions common between 4q-D4Z4 and 10q-D4Z4
chr5	10247944	11050894	Interactions specific for the 10q-D4Z4		chr10	120157693	120417747	Interactions common between 4q-D4Z4 and 10q-D4Z4
chr5	116698829	117497944	Interactions specific for the 10q-D4Z4		chr10	120609175	120796468	Interactions common between 4q-D4Z4 and 10q-D4Z4
chr7	38427101	40438669	Interactions specific for the 10q-D4Z4		chr10	121901797	122618307	Interactions common between 4q-D4Z4 and 10q-D4Z4
chr7	111177101	112677101	Interactions specific for the 10q-D4Z4		chr10	122955048	123466597	Interactions common between 4q-D4Z4 and 10q-D4Z4
chr7	148438669	148677101	Interactions specific for the 10q-D4Z4		chr10	124517370	124574796	Interactions common between 4q-D4Z4 and 10q-D4Z4
chr8	8776169	9442727	Interactions specific for the 10q-D4Z4		chr10	124863493	124863658	Interactions common between 4q-D4Z4 and 10q-D4Z4
chr8	17776169	18526169	Interactions specific for the 10q-D4Z4		chr10	125038829	125097764	Interactions common between 4q-D4Z4 and 10q-D4Z4
chr8	87526169	88008291	Interactions specific for the 10q-D4Z4		chr10	125274894	125394067	Interactions common between 4q-D4Z4 and 10q-D4Z4
chr8	130758291	131692727	Interactions specific for the 10q-D4Z4		chr10	125633882	125754968	Interactions common between 4q-D4Z4 and 10q-D4Z4
chr8	131776169	132442727	Interactions specific for the 10q-D4Z4		chr10	126985248	127415260	Interactions common between 4q-D4Z4 and 10q-D4Z4
chr8	133008291	133942727	Interactions specific for the 10q-D4Z4		chr10	129097523	129202167	Interactions common between 4q-D4Z4 and 10q-D4Z4
chr8	145008291	146364022	Interactions specific for the 10q-D4Z4		chr10	129407286	129456824	Interactions common between 4q-D4Z4 and 10q-D4Z4
chr9	102482583	102933715	Interactions specific for the 10q-D4Z4		chr10	129932335	130574131	Interactions common between 4q-D4Z4 and 10q-D4Z4
chr9	103871278	104823607	Interactions specific for the 10q-D4Z4		chr10	130658453	130658550	Interactions common between 4q-D4Z4 and 10q-D4Z4
chr9	128732583	130232583	Interactions specific for the 10q-D4Z4		chr10	130721908	130734970	Interactions common between 4q-D4Z4 and 10q-D4Z4
chr9	139232583	140732583	Interactions specific for the 10q-D4Z4		chr10	130801212	130814931	Interactions common between 4q-D4Z4 and 10q-D4Z4
chr1	39179	2844834	Interactions common between 4q-D4Z4 and 10q-D4Z4		chr10	131000120	131036234	Interactions common between 4q-D4Z4 and 10q-D4Z4
chr1	16037096	16442006	Interactions common between 4q-D4Z4 and 10q-D4Z4		chr10	131116635	131236393	Interactions common between 4q-D4Z4 and 10q-D4Z4
chr1	214442006	215554661	Interactions common between 4q-D4Z4 and 10q-D4Z4		chr10	131850756	131889680	Interactions common between 4q-D4Z4 and 10q-D4Z4
chr1	242844952	244442006	Interactions common between 4q-D4Z4 and 10q-D4Z4		chr10	131925729	131999107	Interactions common between 4q-D4Z4 and 10q-D4Z4
chr10	110427	618442	Interactions common between 4q-D4Z4 and 10q-D4Z4		chr10	132006484	132067744	Interactions common between 4q-D4Z4 and 10q-D4Z4
chr10	1251624	1751624	Interactions common between 4q-D4Z4 and 10q-D4Z4		chr10	132084453	132112212	Interactions common between 4q-D4Z4 and 10q-D4Z4
chr10	8751624	9001624	Interactions common between 4q-D4Z4 and 10q-D4Z4		chr10	132177468	132206248	Interactions common between 4q-D4Z4 and 10q-D4Z4
chr10	76251624	76256838	Interactions common between 4q-D4Z4 and 10q-D4Z4		chr10	132362448	132428682	Interactions common between 4q-D4Z4 and 10q-D4Z4
chr10	84288666	84685179	Interactions common between 4q-D4Z4 and 10q-D4Z4		chr10	132483300	132847596	Interactions common between 4q-D4Z4 and 10q-D4Z4
chr10	86987781	87755201	Interactions common between 4q-D4Z4 and 10q-D4Z4		chr10	132928388	132956205	Interactions common between 4q-D4Z4 and 10q-D4Z4
chr10	108224672	108888362	Interactions common between 4q-D4Z4 and 10q-D4Z4		chr10	133095029	133163354	Interactions common between 4q-D4Z4 and 10q-D4Z4
chr10	113438614	114120552	Interactions common between 4q-D4Z4 and 10q-D4Z4		chr10	133222897	133248952	Interactions common between 4q-D4Z4 and 10q-D4Z4
chr10	115112608	115512366	Interactions common between 4q-D4Z4 and 10q-D4Z4		chr10	133292947	133347213	Interactions common between 4q-D4Z4 and 10q-D4Z4
chr10	119452243	119460935	Interactions common between 4q-D4Z4 and 10q-D4Z4		chr10	133422131	133585794	Interactions common between 4q-D4Z4 and 10q-D4Z4
chr10	122351347	122511872	Interactions common between 4q-D4Z4 and 10q-D4Z4		chr10	134500087	134521599	Interactions common between 4q-D4Z4 and 10q-D4Z4
chr10	122618388	122634192	Interactions common between 4q-D4Z4 and 10q-D4Z4		chr10	134542992	134553569	Interactions common between 4q-D4Z4 and 10q-D4Z4
chr10	122634682	122658296	Interactions common between 4q-D4Z4 and 10q-D4Z4		chr10	134606134	134859693	Interactions common between 4q-D4Z4 and 10q-D4Z4
chr10	125573646	125845750	Interactions common between 4q-D4Z4 and 10q-D4Z4		chr10	134947597	135011073	Interactions common between 4q-D4Z4 and 10q-D4Z4
chr10	129977456	130225806	Interactions common between 4q-D4Z4 and 10q-D4Z4		chr10	135049813	135088323	Interactions common between 4q-D4Z4 and 10q-D4Z4
chr10	131982671	131999107	Interactions common between 4q-D4Z4 and 10q-D4Z4		chr10	135174997	135263290	Interactions common between 4q-D4Z4 and 10q-D4Z4
chr10	132084453	132112212	Interactions common between 4q-D4Z4 and 10q-D4Z4		chr11	130537653	131287653	Interactions common between 4q-D4Z4 and 10q-D4Z4
chr10	132177468	132218592	Interactions common between 4q-D4Z4 and 10q-D4Z4		chr11	132014737	132092565	Interactions common between 4q-D4Z4 and 10q-D4Z4
chr10	132255835	132266191	Interactions common between 4q-D4Z4 and 10q-D4Z4		chr11	133213577	135006516	Interactions common between 4q-D4Z4 and 10q-D4Z4
chr10	132585361	132594931	Interactions common between 4q-D4Z4 and 10q-D4Z4		chr12	71454	5230665	Interactions common between 4q-D4Z4 and 10q-D4Z4
chr10	132651711	132717747	Interactions common between 4q-D4Z4 and 10q-D4Z4		chr12	115218369	115845275	Interactions common between 4q-D4Z4 and 10q-D4Z4
chr10	132765577	132804150	Interactions common between 4q-D4Z4 and 10q-D4Z4		chr12	129235208	129912185	Interactions common between 4q-D4Z4 and 10q-D4Z4
chr10	132833089	132842702	Interactions common between 4q-D4Z4 and 10q-D4Z4		chr12	130686875	130735208	Interactions common between 4q-D4Z4 and 10q-D4Z4
chr10	133095029	133132147	Interactions common between 4q-D4Z4 and 10q-D4Z4		chr12	132235208	133851895	Interactions common between 4q-D4Z4 and 10q-D4Z4
chr10	133222897	133240245	Interactions common between 4q-D4Z4 and 10q-D4Z4		chr13	112866186	113149672	Interactions common between 4q-D4Z4 and 10q-D4Z4
chr10	134352084	134360317	Interactions common between 4q-D4Z4 and 10q-D4Z4		chr14	94209770	95030059	Interactions common between 4q-D4Z4 and 10q-D4Z4
chr10	134385570	134397565	Interactions common between 4q-D4Z4 and 10q-D4Z4		chr14	106127377	107349540	Interactions common between 4q-D4Z4 and 10q-D4Z4
chr10	134489198	134521599	Interactions common between 4q-D4Z4 and 10q-D4Z4		chr15	89363821	90075724	Interactions common between 4q-D4Z4 and 10q-D4Z4
chr10	134606134	134775954	Interactions common between 4q-D4Z4 and 10q-D4Z4		chr15	98660644	99825724	Interactions common between 4q-D4Z4 and 10q-D4Z4
chr10	135049813	135088323	Interactions common between 4q-D4Z4 and 10q-D4Z4		chr15	102314897	102531392	Interactions common between 4q-D4Z4 and 10q-D4Z4
chr10	135174997	135263290	Interactions common between 4q-D4Z4 and 10q-D4Z4		chr16	78054297	78134454	Interactions common between 4q-D4Z4 and 10q-D4Z4
chr10	135360029	135403434	Interactions common between 4q-D4Z4 and 10q-D4Z4		chr19	58923262	59128983	Interactions common between 4q-D4Z4 and 10q-D4Z4
chr11	129965236	130822273	Interactions common between 4q-D4Z4 and 10q-D4Z4		chr2	15973	2892008	Interactions common between 4q-D4Z4 and 10q-D4Z4
chr12	2595275	5595275	Interactions common between 4q-D4Z4 and 10q-D4Z4		chr2	3705032	3801565	Interactions common between 4q-D4Z4 and 10q-D4Z4
chr12	118845275	119412185	Interactions common between 4q-D4Z4 and 10q-D4Z4		chr2	237092473	237801565	Interactions common between 4q-D4Z4 and 10q-D4Z4
chr12	124191353	125718369	Interactions common between 4q-D4Z4 and 10q-D4Z4		chr2	242939074	243092473	Interactions common between 4q-D4Z4 and 10q-D4Z4
chr12	129936875	130845346	Interactions common between 4q-D4Z4 and 10q-D4Z4		chr3	12998583	13017129	Interactions common between 4q-D4Z4 and 10q-D4Z4
chr12	131436875	131718369	Interactions common between 4q-D4Z4 and 10q-D4Z4		chr3	45193427	45852359	Interactions common between 4q-D4Z4 and 10q-D4Z4
chr14	24479192	24520857	Interactions common between 4q-D4Z4 and 10q-D4Z4		chr3	183943427	184575307	Interactions common between 4q-D4Z4 and 10q-D4Z4
chr14	96459770	99255562	Interactions common between 4q-D4Z4 and 10q-D4Z4		chr3	184748583	186102359	Interactions common between 4q-D4Z4 and 10q-D4Z4
chr14	100127377	100270857	Interactions common between 4q-D4Z4 and 10q-D4Z4		chr3	190575307	191389503	Interactions common between 4q-D4Z4 and 10q-D4Z4
chr15	93825724	94613821	Interactions common between 4q-D4Z4 and 10q-D4Z4		chr3	193767129	194352359	Interactions common between 4q-D4Z4 and 10q-D4Z4
chr17	46744	5080766	Interactions common between 4q-D4Z4 and 10q-D4Z4		chr4	16362748	16862748	Interactions common between 4q-D4Z4 and 10q-D4Z4
chr2	114856289	115551565	Interactions common between 4q-D4Z4 and 10q-D4Z4		chr4	17362748	17511885	Interactions common between 4q-D4Z4 and 10q-D4Z4
chr2	231106289	232551565	Interactions common between 4q-D4Z4 and 10q-D4Z4		chr4	143400207	144599297	Interactions common between 4q-D4Z4 and 10q-D4Z4
chr2	234705032	235606289	Interactions common between 4q-D4Z4 and 10q-D4Z4		chr4	147337242	148686813	Interactions common between 4q-D4Z4 and 10q-D4Z4
chr2	242189074	243092473	Interactions common between 4q-D4Z4 and 10q-D4Z4		chr4	148705040	149104582	Interactions common between 4q-D4Z4 and 10q-D4Z4
chr3	53352359	53498583	Interactions common between 4q-D4Z4 and 10q-D4Z4		chr4	153859394	154485639	Interactions common between 4q-D4Z4 and 10q-D4Z4
chr4	129362748	129862748	Interactions common between 4q-D4Z4 and 10q-D4Z4		chr4	164170634	164663886	Interactions common between 4q-D4Z4 and 10q-D4Z4
chr4	164170634	164904063	Interactions common between 4q-D4Z4 and 10q-D4Z4		chr4	166260959	166831360	Interactions common between 4q-D4Z4 and 10q-D4Z4
chr4	184974917	185117959	Interactions common between 4q-D4Z4 and 10q-D4Z4		chr4	168806063	169215889	Interactions common between 4q-D4Z4 and 10q-D4Z4
chr4	186643351	186644386	Interactions common between 4q-D4Z4 and 10q-D4Z4		chr4	169810984	170006258	Interactions common between 4q-D4Z4 and 10q-D4Z4
chr4	186686298	186753824	Interactions common between 4q-D4Z4 and 10q-D4Z4		chr4	176909622	177273380	Interactions common between 4q-D4Z4 and 10q-D4Z4
chr4	187184160	187294569	Interactions common between 4q-D4Z4 and 10q-D4Z4		chr4	178365388	178637467	Interactions common between 4q-D4Z4 and 10q-D4Z4
chr4	187298494	187387977	Interactions common between 4q-D4Z4 and 10q-D4Z4		chr4	182376850	182627488	Interactions common between 4q-D4Z4 and 10q-D4Z4
chr4	187426238	187553357	Interactions common between 4q-D4Z4 and 10q-D4Z4		chr4	182737352	182882025	Interactions common between 4q-D4Z4 and 10q-D4Z4
chr4	187613528	187724497	Interactions common between 4q-D4Z4 and 10q-D4Z4		chr4	183700645	183959246	Interactions common between 4q-D4Z4 and 10q-D4Z4
chr4	187796454	187842479	Interactions common between 4q-D4Z4 and 10q-D4Z4		chr4	184384581	184765338	Interactions common between 4q-D4Z4 and 10q-D4Z4
chr4	187975840	188068460	Interactions common between 4q-D4Z4 and 10q-D4Z4		chr4	184848886	185426520	Interactions common between 4q-D4Z4 and 10q-D4Z4
chr4	188493882	188668784	Interactions common between 4q-D4Z4 and 10q-D4Z4		chr4	185771030	186166794	Interactions common between 4q-D4Z4 and 10q-D4Z4
chr4	188836905	188924937	Interactions common between 4q-D4Z4 and 10q-D4Z4		chr4	186293582	186782180	Interactions common between 4q-D4Z4 and 10q-D4Z4
chr4	189434901	189485914	Interactions common between 4q-D4Z4 and 10q-D4Z4		chr4	186896841	187345406	Interactions common between 4q-D4Z4 and 10q-D4Z4
chr4	189591062	189793870	Interactions common between 4q-D4Z4 and 10q-D4Z4		chr4	187349097	187835824	Interactions common between 4q-D4Z4 and 10q-D4Z4
chr4	189842882	189978864	Interactions common between 4q-D4Z4 and 10q-D4Z4		chr4	187932339	187932580	Interactions common between 4q-D4Z4 and 10q-D4Z4
chr4	190070377	190078863	Interactions common between 4q-D4Z4 and 10q-D4Z4		chr4	187993896	187999302	Interactions common between 4q-D4Z4 and 10q-D4Z4
chr4	190100106	190117127	Interactions common between 4q-D4Z4 and 10q-D4Z4		chr4	188011312	188727658	Interactions common between 4q-D4Z4 and 10q-D4Z4
chr4	190129897	190142660	Interactions common between 4q-D4Z4 and 10q-D4Z4		chr4	188757587	188762548	Interactions common between 4q-D4Z4 and 10q-D4Z4
chr4	190201201	190455457	Interactions common between 4q-D4Z4 and 10q-D4Z4		chr4	188772470	188777411	Interactions common between 4q-D4Z4 and 10q-D4Z4
chr4	190496381	190630904	Interactions common between 4q-D4Z4 and 10q-D4Z4		chr4	188792223	188797141	Interactions common between 4q-D4Z4 and 10q-D4Z4
chr4	190635111	190638600	Interactions common between 4q-D4Z4 and 10q-D4Z4		chr4	188815365	189113467	Interactions common between 4q-D4Z4 and 10q-D4Z4
chr4	190645578	190649056	Interactions common between 4q-D4Z4 and 10q-D4Z4		chr4	189146033	189157063	Interactions common between 4q-D4Z4 and 10q-D4Z4
chr4	190656009	190666409	Interactions common between 4q-D4Z4 and 10q-D4Z4		chr4	189379637	189385269	Interactions common between 4q-D4Z4 and 10q-D4Z4
chr4	190697504	190700948	Interactions common between 4q-D4Z4 and 10q-D4Z4		chr4	189428442	189485914	Interactions common between 4q-D4Z4 and 10q-D4Z4
chr4	190707838	190711278	Interactions common between 4q-D4Z4 and 10q-D4Z4		chr4	189509081	189642719	Interactions common between 4q-D4Z4 and 10q-D4Z4
chr4	190725027	190728457	Interactions common between 4q-D4Z4 and 10q-D4Z4		chr4	189653341	189732792	Interactions common between 4q-D4Z4 and 10q-D4Z4
chr4	190762654	190769457	Interactions common between 4q-D4Z4 and 10q-D4Z4		chr4	189794886	189803981	Interactions common between 4q-D4Z4 and 10q-D4Z4
chr4	190786421	190789802	Interactions common between 4q-D4Z4 and 10q-D4Z4		chr4	189813612	190028090	Interactions common between 4q-D4Z4 and 10q-D4Z4
chr4	190810048	190813414	Interactions common between 4q-D4Z4 and 10q-D4Z4		chr4	190040752	190049207	Interactions common between 4q-D4Z4 and 10q-D4Z4
chr4	190820146	190823510	Interactions common between 4q-D4Z4 and 10q-D4Z4		chr4	190070377	190087356	Interactions common between 4q-D4Z4 and 10q-D4Z4
chr4	190847075	190851325	Interactions common between 4q-D4Z4 and 10q-D4Z4		chr4	190100106	190113054	Interactions common between 4q-D4Z4 and 10q-D4Z4
chr5	140747944	142198829	Interactions common between 4q-D4Z4 and 10q-D4Z4		chr4	190183346	190185023	Interactions common between 4q-D4Z4 and 10q-D4Z4
chr5	142247944	142849744	Interactions common between 4q-D4Z4 and 10q-D4Z4		chr4	190206000	190210160	Interactions common between 4q-D4Z4 and 10q-D4Z4
chr5	153519547	153550894	Interactions common between 4q-D4Z4 and 10q-D4Z4		chr4	190226083	190260489	Interactions common between 4q-D4Z4 and 10q-D4Z4
chr5	159448829	161599744	Interactions common between 4q-D4Z4 and 10q-D4Z4		chr4	190265816	190396797	Interactions common between 4q-D4Z4 and 10q-D4Z4
chr5	174036679	174349744	Interactions common between 4q-D4Z4 and 10q-D4Z4		chr4	190421450	190425150	Interactions common between 4q-D4Z4 and 10q-D4Z4
chr6	153032002	153063046	Interactions common between 4q-D4Z4 and 10q-D4Z4		chr4	190454651	190483975	Interactions common between 4q-D4Z4 and 10q-D4Z4
chr6	153793333	154100529	Interactions common between 4q-D4Z4 and 10q-D4Z4		chr4	190494951	190505915	Interactions common between 4q-D4Z4 and 10q-D4Z4
chr6	158452660	159887131	Interactions common between 4q-D4Z4 and 10q-D4Z4		chr4	190571285	190592763	Interactions common between 4q-D4Z4 and 10q-D4Z4
chr7	149188669	149681406	Interactions common between 4q-D4Z4 and 10q-D4Z4		chr4	190614041	190617561	Interactions common between 4q-D4Z4 and 10q-D4Z4
chr7	149938669	151172982	Interactions common between 4q-D4Z4 and 10q-D4Z4		chr4	190624600	190628104	Interactions common between 4q-D4Z4 and 10q-D4Z4
chr7	152011820	152313318	Interactions common between 4q-D4Z4 and 10q-D4Z4		chr4	190635111	190638600	Interactions common between 4q-D4Z4 and 10q-D4Z4
chr8	139942727	140776169	Interactions common between 4q-D4Z4 and 10q-D4Z4		chr4	190645578	190649056	Interactions common between 4q-D4Z4 and 10q-D4Z4
chr9	118683715	119133808	Interactions common between 4q-D4Z4 and 10q-D4Z4		chr4	190656009	190666409	Interactions common between 4q-D4Z4 and 10q-D4Z4
chr9	126538858	126633808	Interactions common between 4q-D4Z4 and 10q-D4Z4		chr4	190694055	190697502	Interactions common between 4q-D4Z4 and 10q-D4Z4
chrX	2737197	8017985	Interactions common between 4q-D4Z4 and 10q-D4Z4		chr4	190707838	190711278	Interactions common between 4q-D4Z4 and 10q-D4Z4
chrX	8466798	10299069	Interactions common between 4q-D4Z4 and 10q-D4Z4		chr4	190725027	190728457	Interactions common between 4q-D4Z4 and 10q-D4Z4
					chr4	190762654	190769457	Interactions common between 4q-D4Z4 and 10q-D4Z4
					chr4	190786421	190793182	Interactions common between 4q-D4Z4 and 10q-D4Z4
					chr4	190810048	190814076	Interactions common between 4q-D4Z4 and 10q-D4Z4
					chr5	5050894	5376902	Interactions common between 4q-D4Z4 and 10q-D4Z4
					chr5	168448829	170394894	Interactions common between 4q-D4Z4 and 10q-D4Z4
					chr5	174550894	176698829	Interactions common between 4q-D4Z4 and 10q-D4Z4
					chr5	176800894	178733734	Interactions common between 4q-D4Z4 and 10q-D4Z4
					chr5	179495026	180915260	Interactions common between 4q-D4Z4 and 10q-D4Z4
					chr6	167600529	169016844	Interactions common between 4q-D4Z4 and 10q-D4Z4
					chr6	169850529	171115067	Interactions common between 4q-D4Z4 and 10q-D4Z4
					chr7	18459	2291480	Interactions common between 4q-D4Z4 and 10q-D4Z4
					chr7	3407445	3844354	Interactions common between 4q-D4Z4 and 10q-D4Z4
					chr7	148922982	149385241	Interactions common between 4q-D4Z4 and 10q-D4Z4
					chr7	152681406	153927101	Interactions common between 4q-D4Z4 and 10q-D4Z4
					chr7	155938669	156031254	Interactions common between 4q-D4Z4 and 10q-D4Z4
					chr7	156431406	157172982	Interactions common between 4q-D4Z4 and 10q-D4Z4
					chr7	158610239	159138663	Interactions common between 4q-D4Z4 and 10q-D4Z4
					chr8	133276169	133851875	Interactions common between 4q-D4Z4 and 10q-D4Z4
					chr8	133874010	134776169	Interactions common between 4q-D4Z4 and 10q-D4Z4
					chr8	139192727	139597809	Interactions common between 4q-D4Z4 and 10q-D4Z4
					chr8	141258291	141351875	Interactions common between 4q-D4Z4 and 10q-D4Z4
					chr9	28099	4119116	Interactions common between 4q-D4Z4 and 10q-D4Z4
					chr9	124683715	124982583	Interactions common between 4q-D4Z4 and 10q-D4Z4

## Sheet: 4q-10q lost int. comparison
4q-D4Z4 vs 10q-D4Z4 lost interactions in FSHD1
Chr	Start	End	Annotation
chr1	10037096	10104558	Interactions specifically lost by the 4q-D4Z4
chr1	39761566	40054661	Interactions specifically lost by the 4q-D4Z4
chr1	88037096	90287096	Interactions specifically lost by the 4q-D4Z4
chr1	141304661	142787096	Interactions specifically lost by the 4q-D4Z4
chr1	171287096	172054661	Interactions specifically lost by the 4q-D4Z4
chr1	217787096	221554661	Interactions specifically lost by the 4q-D4Z4
chr10	53006838	53756838	Interactions specifically lost by the 4q-D4Z4
chr10	76213917	76256838	Interactions specifically lost by the 4q-D4Z4
chr10	84199246	84685179	Interactions specifically lost by the 4q-D4Z4
chr10	86987781	87755201	Interactions specifically lost by the 4q-D4Z4
chr10	127755382	127782642	Interactions specifically lost by the 4q-D4Z4
chr11	59287653	59375981	Interactions specifically lost by the 4q-D4Z4
chr11	70537653	72764737	Interactions specifically lost by the 4q-D4Z4
chr11	114787653	116287653	Interactions specifically lost by the 4q-D4Z4
chr12	69936875	72186875	Interactions specifically lost by the 4q-D4Z4
chr12	92436875	93912185	Interactions specifically lost by the 4q-D4Z4
chr12	101436875	102162185	Interactions specifically lost by the 4q-D4Z4
chr12	102912185	103095346	Interactions specifically lost by the 4q-D4Z4
chr12	107691353	108186875	Interactions specifically lost by the 4q-D4Z4
chr13	25623156	27205006	Interactions specifically lost by the 4q-D4Z4
chr13	36205006	37093864	Interactions specifically lost by the 4q-D4Z4
chr13	113899672	114343864	Interactions specifically lost by the 4q-D4Z4
chr14	59709770	60520857	Interactions specifically lost by the 4q-D4Z4
chr14	71709770	72459770	Interactions specifically lost by the 4q-D4Z4
chr14	84377377	84520857	Interactions specifically lost by the 4q-D4Z4
chr15	51410644	52371850	Interactions specifically lost by the 4q-D4Z4
chr15	68061242	69114903	Interactions specifically lost by the 4q-D4Z4
chr15	80061242	82311242	Interactions specifically lost by the 4q-D4Z4
chr15	90410644	92121850	Interactions specifically lost by the 4q-D4Z4
chr15	96410644	97614903	Interactions specifically lost by the 4q-D4Z4
chr17	13901132	14061239	Interactions specifically lost by the 4q-D4Z4
chr17	69835298	71811239	Interactions specifically lost by the 4q-D4Z4
chr17	73585298	75408330	Interactions specifically lost by the 4q-D4Z4
chr17	79908330	81195210	Interactions specifically lost by the 4q-D4Z4
chr18	44786	10867378	Interactions specifically lost by the 4q-D4Z4
chr18	27956082	29459031	Interactions specifically lost by the 4q-D4Z4
chr18	33893019	33956082	Interactions specifically lost by the 4q-D4Z4
chr18	70643019	71456082	Interactions specifically lost by the 4q-D4Z4
chr19	66103	8174397	Interactions specifically lost by the 4q-D4Z4
chr19	35147424	36674397	Interactions specifically lost by the 4q-D4Z4
chr2	4439074	6051565	Interactions specifically lost by the 4q-D4Z4
chr2	6999851	9051565	Interactions specifically lost by the 4q-D4Z4
chr2	21689074	22439074	Interactions specifically lost by the 4q-D4Z4
chr2	35205032	35301565	Interactions specifically lost by the 4q-D4Z4
chr2	35955032	36801565	Interactions specifically lost by the 4q-D4Z4
chr2	90999851	93689074	Interactions specifically lost by the 4q-D4Z4
chr2	194955032	195801565	Interactions specifically lost by the 4q-D4Z4
chr2	208455032	209955032	Interactions specifically lost by the 4q-D4Z4
chr2	212955032	213051565	Interactions specifically lost by the 4q-D4Z4
chr2	213249851	215301565	Interactions specifically lost by the 4q-D4Z4
chr20	119107	6418509	Interactions specifically lost by the 4q-D4Z4
chr22	16058515	24671984	Interactions specifically lost by the 4q-D4Z4
chr22	29171984	29277708	Interactions specifically lost by the 4q-D4Z4
chr22	36957440	37421984	Interactions specifically lost by the 4q-D4Z4
chr3	6102359	6139503	Interactions specifically lost by the 4q-D4Z4
chr3	27665257	29165257	Interactions specifically lost by the 4q-D4Z4
chr3	168812213	169602359	Interactions specifically lost by the 4q-D4Z4
chr3	178562213	179352359	Interactions specifically lost by the 4q-D4Z4
chr3	180062213	181602359	Interactions specifically lost by the 4q-D4Z4
chr3	191915257	192852359	Interactions specifically lost by the 4q-D4Z4
chr4	8112748	8862748	Interactions specifically lost by the 4q-D4Z4
chr4	10612748	10862748	Interactions specifically lost by the 4q-D4Z4
chr4	14862748	15112748	Interactions specifically lost by the 4q-D4Z4
chr4	15612748	16362748	Interactions specifically lost by the 4q-D4Z4
chr4	29112748	29362748	Interactions specifically lost by the 4q-D4Z4
chr4	53862748	54112748	Interactions specifically lost by the 4q-D4Z4
chr4	69112748	69362748	Interactions specifically lost by the 4q-D4Z4
chr4	75612748	75862748	Interactions specifically lost by the 4q-D4Z4
chr4	91612748	92112748	Interactions specifically lost by the 4q-D4Z4
chr4	93112748	93862748	Interactions specifically lost by the 4q-D4Z4
chr4	122612748	122862748	Interactions specifically lost by the 4q-D4Z4
chr4	137612748	137862748	Interactions specifically lost by the 4q-D4Z4
chr4	189218902	189218913	Interactions specifically lost by the 4q-D4Z4
chr4	190697504	190700948	Interactions specifically lost by the 4q-D4Z4
chr5	17394894	19269547	Interactions specifically lost by the 4q-D4Z4
chr5	33786679	35769547	Interactions specifically lost by the 4q-D4Z4
chr5	132786679	132894894	Interactions specifically lost by the 4q-D4Z4
chr6	72793333	72813046	Interactions specifically lost by the 4q-D4Z4
chr6	73543333	74313046	Interactions specifically lost by the 4q-D4Z4
chr6	75043333	75063046	Interactions specifically lost by the 4q-D4Z4
chr6	105793333	106563046	Interactions specifically lost by the 4q-D4Z4
chr6	120793333	121563046	Interactions specifically lost by the 4q-D4Z4
chr6	129813046	131313046	Interactions specifically lost by the 4q-D4Z4
chr6	140293333	141063046	Interactions specifically lost by the 4q-D4Z4
chr6	148543333	149313046	Interactions specifically lost by the 4q-D4Z4
chr7	93135241	93422982	Interactions specifically lost by the 4q-D4Z4
chr7	98476158	100172982	Interactions specifically lost by the 4q-D4Z4
chr7	125761820	127172982	Interactions specifically lost by the 4q-D4Z4
chr8	19684013	19851875	Interactions specifically lost by the 4q-D4Z4
chr8	86601875	87351875	Interactions specifically lost by the 4q-D4Z4
chr8	88684013	88851875	Interactions specifically lost by the 4q-D4Z4
chr8	98601875	99351875	Interactions specifically lost by the 4q-D4Z4
chr8	123351875	124874010	Interactions specifically lost by the 4q-D4Z4
chr9	20218708	20883808	Interactions specifically lost by the 4q-D4Z4
chr9	25383808	26038858	Interactions specifically lost by the 4q-D4Z4
chr9	67288858	70886737	Interactions specifically lost by the 4q-D4Z4
chr9	86968708	89133808	Interactions specifically lost by the 4q-D4Z4
chrX	15216798	16267985	Interactions specifically lost by the 4q-D4Z4
chrX	17182823	17767985	Interactions specifically lost by the 4q-D4Z4
chrX	119017985	120919443	Interactions specifically lost by the 4q-D4Z4
chrX	125466798	126169443	Interactions specifically lost by the 4q-D4Z4
chrX	135517985	136432823	Interactions specifically lost by the 4q-D4Z4
chrX	137017985	137419443	Interactions specifically lost by the 4q-D4Z4
chr1	24008304	26192006	Interactions specifically lost by the 10q-D4Z4
chr1	46442006	47942006	Interactions specifically lost by the 10q-D4Z4
chr1	81758304	83192006	Interactions specifically lost by the 10q-D4Z4
chr1	201008304	202161933	Interactions specifically lost by the 10q-D4Z4
chr1	214442006	215942006	Interactions specifically lost by the 10q-D4Z4
chr1	221844952	222692006	Interactions specifically lost by the 10q-D4Z4
chr1	230094952	231411933	Interactions specifically lost by the 10q-D4Z4
chr10	2501624	2751624	Interactions specifically lost by the 10q-D4Z4
chr10	12501624	12751624	Interactions specifically lost by the 10q-D4Z4
chr10	34251624	34501624	Interactions specifically lost by the 10q-D4Z4
chr10	45501624	46001624	Interactions specifically lost by the 10q-D4Z4
chr10	54001624	54251624	Interactions specifically lost by the 10q-D4Z4
chr10	60751624	61001624	Interactions specifically lost by the 10q-D4Z4
chr10	62751624	63001624	Interactions specifically lost by the 10q-D4Z4
chr10	65251624	65751624	Interactions specifically lost by the 10q-D4Z4
chr10	68001624	68501624	Interactions specifically lost by the 10q-D4Z4
chr10	69001624	70251624	Interactions specifically lost by the 10q-D4Z4
chr10	89114055	89516828	Interactions specifically lost by the 10q-D4Z4
chr10	93370276	94185185	Interactions specifically lost by the 10q-D4Z4
chr10	94768221	95129123	Interactions specifically lost by the 10q-D4Z4
chr10	95647730	96116677	Interactions specifically lost by the 10q-D4Z4
chr10	99056647	99166411	Interactions specifically lost by the 10q-D4Z4
chr10	101717110	101833317	Interactions specifically lost by the 10q-D4Z4
chr10	103398692	103775994	Interactions specifically lost by the 10q-D4Z4
chr10	104155641	104534577	Interactions specifically lost by the 10q-D4Z4
chr10	109527460	109768729	Interactions specifically lost by the 10q-D4Z4
chr10	118579651	118656826	Interactions specifically lost by the 10q-D4Z4
chr10	118962493	119257410	Interactions specifically lost by the 10q-D4Z4
chr10	119402241	119543737	Interactions specifically lost by the 10q-D4Z4
chr10	119753276	119821411	Interactions specifically lost by the 10q-D4Z4
chr10	122618388	122724348	Interactions specifically lost by the 10q-D4Z4
chr10	128826912	128881468	Interactions specifically lost by the 10q-D4Z4
chr10	130899119	130958640	Interactions specifically lost by the 10q-D4Z4
chr10	131273138	131293144	Interactions specifically lost by the 10q-D4Z4
chr10	131467315	131536246	Interactions specifically lost by the 10q-D4Z4
chr10	131666179	131722927	Interactions specifically lost by the 10q-D4Z4
chr10	132255835	132266191	Interactions specifically lost by the 10q-D4Z4
chr10	132428720	132439687	Interactions specifically lost by the 10q-D4Z4
chr10	133365689	133375171	Interactions specifically lost by the 10q-D4Z4
chr10	133607725	133646180	Interactions specifically lost by the 10q-D4Z4
chr10	133758171	133844487	Interactions specifically lost by the 10q-D4Z4
chr10	134347678	134360317	Interactions specifically lost by the 10q-D4Z4
chr10	134385570	134397565	Interactions specifically lost by the 10q-D4Z4
chr10	135360029	135403434	Interactions specifically lost by the 10q-D4Z4
chr12	74718369	75345275	Interactions specifically lost by the 10q-D4Z4
chr12	86718369	87235208	Interactions specifically lost by the 10q-D4Z4
chr12	87874960	89374960	Interactions specifically lost by the 10q-D4Z4
chr12	103968369	104485208	Interactions specifically lost by the 10q-D4Z4
chr12	123235208	125718369	Interactions specifically lost by the 10q-D4Z4
chr14	36530059	36731948	Interactions specifically lost by the 10q-D4Z4
chr15	59158776	61064897	Interactions specifically lost by the 10q-D4Z4
chr15	63075724	65325724	Interactions specifically lost by the 10q-D4Z4
chr17	21292636	23563755	Interactions specifically lost by the 10q-D4Z4
chr17	34042636	36313755	Interactions specifically lost by the 10q-D4Z4
chr17	59563755	61792636	Interactions specifically lost by the 10q-D4Z4
chr18	44993047	46352274	Interactions specifically lost by the 10q-D4Z4
chr19	15791615	16467031	Interactions specifically lost by the 10q-D4Z4
chr2	114856289	115753132	Interactions specifically lost by the 10q-D4Z4
chr2	127606289	127753132	Interactions specifically lost by the 10q-D4Z4
chr2	143612636	145606289	Interactions specifically lost by the 10q-D4Z4
chr2	225856289	227503132	Interactions specifically lost by the 10q-D4Z4
chr2	231106289	235606289	Interactions specifically lost by the 10q-D4Z4
chr20	51421042	52921042	Interactions specifically lost by the 10q-D4Z4
chr21	27271878	28771878	Interactions specifically lost by the 10q-D4Z4
chr21	37796315	39271878	Interactions specifically lost by the 10q-D4Z4
chr3	9193427	9248583	Interactions specifically lost by the 10q-D4Z4
chr3	9943427	11498583	Interactions specifically lost by the 10q-D4Z4
chr3	31575307	32498583	Interactions specifically lost by the 10q-D4Z4
chr3	54998583	56498583	Interactions specifically lost by the 10q-D4Z4
chr3	82693427	84267129	Interactions specifically lost by the 10q-D4Z4
chr3	122443427	123267129	Interactions specifically lost by the 10q-D4Z4
chr3	150943427	150998583	Interactions specifically lost by the 10q-D4Z4
chr3	156943427	157748583	Interactions specifically lost by the 10q-D4Z4
chr3	169767129	170517129	Interactions specifically lost by the 10q-D4Z4
chr3	195886262	196555641	Interactions specifically lost by the 10q-D4Z4
chr4	20414	2533249	Interactions specifically lost by the 10q-D4Z4
chr4	31863966	32046053	Interactions specifically lost by the 10q-D4Z4
chr5	10247944	11050894	Interactions specifically lost by the 10q-D4Z4
chr5	116698829	117497944	Interactions specifically lost by the 10q-D4Z4
chr5	152402389	153550894	Interactions specifically lost by the 10q-D4Z4
chr6	152516844	154100529	Interactions specifically lost by the 10q-D4Z4
chr6	157442929	159887131	Interactions specifically lost by the 10q-D4Z4
chr7	38427101	40438669	Interactions specifically lost by the 10q-D4Z4
chr7	111177101	112677101	Interactions specifically lost by the 10q-D4Z4
chr7	149938669	152313318	Interactions specifically lost by the 10q-D4Z4
chr8	8776169	9442727	Interactions specifically lost by the 10q-D4Z4
chr8	17776169	18526169	Interactions specifically lost by the 10q-D4Z4
chr8	87526169	88008291	Interactions specifically lost by the 10q-D4Z4
chr8	130758291	131692727	Interactions specifically lost by the 10q-D4Z4
chr8	131776169	132442727	Interactions specifically lost by the 10q-D4Z4
chr8	139942727	140776169	Interactions specifically lost by the 10q-D4Z4
chr8	145008291	146364022	Interactions specifically lost by the 10q-D4Z4
chr9	102482583	102933715	Interactions specifically lost by the 10q-D4Z4
chr9	103871278	104823607	Interactions specifically lost by the 10q-D4Z4
chr9	128732583	130232583	Interactions specifically lost by the 10q-D4Z4
chr1	16037096	16442006	Interactions lost by both 4q-D4Z4 and 10q-D4Z4
chr10	8751624	9001624	Interactions lost by both 4q-D4Z4 and 10q-D4Z4
chr14	24479192	24520857	Interactions lost by both 4q-D4Z4 and 10q-D4Z4
chr14	100127377	100270857	Interactions lost by both 4q-D4Z4 and 10q-D4Z4
chr15	93825724	94613821	Interactions lost by both 4q-D4Z4 and 10q-D4Z4
chr17	46744	5080766	Interactions lost by both 4q-D4Z4 and 10q-D4Z4
chr3	53352359	53498583	Interactions lost by both 4q-D4Z4 and 10q-D4Z4
chr4	129362748	129862748	Interactions lost by both 4q-D4Z4 and 10q-D4Z4
chr5	140747944	142198829	Interactions lost by both 4q-D4Z4 and 10q-D4Z4
chr5	142247944	142849744	Interactions lost by both 4q-D4Z4 and 10q-D4Z4
chr5	159448829	161599744	Interactions lost by both 4q-D4Z4 and 10q-D4Z4
chr9	118683715	119133808	Interactions lost by both 4q-D4Z4 and 10q-D4Z4
chr9	126538858	126633808	Interactions lost by both 4q-D4Z4 and 10q-D4Z4
chrX	8466798	10299069	Interactions lost by both 4q-D4Z4 and 10q-D4Z4

## Sheet: 4C-FBXO32 interactions
FBXO32 nearbait interactions
CN			FSHD1
Chr	Start	End	Chr	Start	End
chr8	121281272	121384519	chr8	120139765	120223613
chr8	121507654	121536242	chr8	120394842	120643703
chr8	121677471	121677624	chr8	121352452	121477772
chr8	121820550	121850211	chr8	121677471	121762860
chr8	121939857	121969881	chr8	122402883	122432232
chr8	122687656	122713940	chr8	122989434	123012684
chr8	123502065	123515860	chr8	123232791	123252193
chr8	123736804	123814223	chr8	123345055	123361925
chr8	123946098	123956998	chr8	123487754	123501807
chr8	124083552	124112988	chr8	123691441	123702825
chr8	124222698	124231239	chr8	123736804	123747932
chr8	124305835	124321671	chr8	124187517	124196351
chr8	124337392	124345077	chr8	124297800	124321671
chr8	124419283	124426296	chr8	124419283	124426296
chr8	124440323	124453981	chr8	124447212	124453981
chr8	124474165	124487253	chr8	124474165	124487253
chr8	124506628	124538008	chr8	124500233	124544200
chr8	124587135	124593224	chr8	124587135	124593224
chr8	124617473	124629587	chr8	124665922	124678040
chr8	124665922	124678040	chr8	124696229	124738737
chr8	124696229	124738737	chr8	124769232	124775344
chr8	124787629	124799946	chr8	124793787	124806136
chr8	124916020	124922802	chr8	124950680	124957716
chr8	124943643	124957716	chr8	125039623	125047362
chr8	124994083	125008963	chr8	125063185	125071095
chr8	125039623	125047362	chr8	125103485	125128118
chr8	125095335	125136401	chr8	125186359	125203000
chr8	125153040	125161354	chr8	125276703	125284778
chr8	125178030	125194688	chr8	125363778	125379414
chr8	125252384	125276733	chr8	125458772	125483524
chr8	125371596	125379414	chr8	125509358	125545426
chr8	125458772	125483524	chr8	125616323	125627104
chr8	125545594	125594780	chr8	125895910	126006015
chr8	125895910	125926337	chr8	126040254	126057419
chr8	126040254	126057419	chr8	126133568	126174778
chr8	126556085	126660403	chr8	126608244	126660403
chr8	127082100	127178477	chr8	127804188	127878068
chr8	128189625	128191560	chr8	128320018	128362745
chr8	128447618	128667144	chr8	128534227	128577773
			chr8	128881563	129189211
