# Supplementary material for: 4q-D4Z4 chromatin architecture regulates the transcription of muscle atrophic genes in facioscapulohumeral muscular dystrophy
Source: HighWire-hosted journal article supplement (doi:10.1101/gr.233288.117), 2019-05-16
Supplement: Supplemental_Table_S3_JD.xlsx [file Supplemental_Table_S3_JD.xlsx]

## Sheet: legend
Supplemental Table S3. 3D multicolor DNA FISH measurements
Sheet 1	Colocalization distances
Sheet 2	Normalized distances from nuclear centroid

## Sheet: Colocalization distances
Colocalization distances
Chr4q35.1/4q-D4Z4	Chr4q35.1/Chr3q11.2 (C-)				Chr4q35.1/Chr8q24.3 (C+)				Chr4q35.1/Chr10q26.3		Chr4q35.1/FBXO32 region
CN+FSHD1	CN MB	FSHD1 MB	CN MT	FSHD1 MT	CN MB	FSHD1 MB	CN MT	FSHD1 MT	CN MB	FSHD1 MB	CN MB	FSHD1 MB	FSHD2 MB	CN MT	FSHD1 MT
0.589	14.3798	6.2546	5.8516	2.067	11.7785	11.1128	1.5511	10.1762	5.3114	7.3022	0.0874	0.1078	11.7144	0.7405	2.6899
0.85	13.8464	6.5112	6.9072	6.7975	12.0531	6.876	5.4875	9.4054	2.0429	6.5376	0.1424	0.1551	1.4627	11.6965	1.6346
0.442	5.9607	4.6529	7.3847	20.016	9.911	3.876	10.7678	12.3066	6.1776	5.3138	0.1597	0.1906	5.5779	13.6562	6.6941
0.569	6.7217	2.6081	3.1507	19.7634	7.5154	8.8148	13.1598	13.615	4.1267	7.3586	0.1602	0.2664	7.0487	14.4559	4.2633
0.934	17.4134	10.0709	11.8508	6.0832	2.7443	7.2789	9.4882	8.7176	6.6054	1.8422	0.1945	0.2926	7.0486	1.9101	3.5806
0.681	12.6549	8.1418	4.014	4.537	8.931	13.9437	0.1428	5.7448	7.3489	14.2722	0.198	0.3056	5.9636	16.9998	4.0456
0.43	12.1726	8.2726	9.7386	6.3912	1.756	11.454	4.0172	5.9728	3.4655	2.4281	0.1982	0.3476	3.2522	6.0144	5.0788
0.856	6.2455	8.3736	14.281	4.4421	15.8954	12.057	3.0431	5.6605	12.8527	4.9372	0.2038	0.3572	2.077	6.8016	8.1475
0.307	16.172	8.5013	0.7623	8.4501	9.7431	2.9462	11.6089	7.954	11.1444	11.1164	0.2162	0.4328	12.5162	6.9452	10.9492
0.645	7.3475	1.9612	3.2749	6.3312	3.8079	3.8978	11.6062	5.9248	2.2715	14.3578	0.2182	0.472	7.4555	8.1813	11.125
0.375	8.7686	0.9055	8.2347	7.8009	7.2664	12.8532	10.6283	7.2998	7.7016	15.9427	0.2493	0.4754	6.1523	11.1351	10.0885
0.826	5.4957	2.4783	10.9108	1.8508	9.3636	3.1456	0.3666	0.476	5.973	8.3264	0.2586	0.4837	12.4289	9.5401	3.1598
0.743	14.502	12.9704	9.8181	3.7635	9.4245	7.032	15.1018	5.3412	9.2877	9.1984	0.2853	0.5383	11.7252	7.1653	4.891
0.478	5.5858	8.8707	5.3583	4.5411	8.2369	9.2966	12.5155	8.532	4.7789	2.6884	0.3069	0.5503	6.6785	5.9634	7.9446
0.614	10.4603	4.8974	6.17	3.6669	6.555	10.8553	10.6724	3.9523	13.5472	5.382	0.3829	0.5878	6.8253	7.7343	6.7355
0.627	5.2485	5.4313	10.5289	4.3044	8.3089	3.8314	11.4567	12.7753	1.0496	12.1124	0.3848	0.588	4.6807	3.3135	9.8937
0.835	6.2711	3.9429	5.0259	7.8244	3.9121	9.7677	1.4561	1.7872	4.0756	14.0352	0.3993	0.5894	5.251	5.2964	13.5324
0.424	9.6743	10.1044	5.6237	1.1862	7.5701	10.4822	2.3247	6.3925	8.3762	9.5413	0.432	0.6093	9.5478	9.5537	6.8213
0.373	8.3576	8.8573	6.5138	1.8622	0.98	5.0819	12.4997	7.9326	9.3273	1.6875	0.4325	0.6161	2.3987	5.9006	12.362
0.679	3.8652	6.9602	2.0008	11.2517	9.1062	2.575	9.4694	3.7556	5.4193	5.1011	0.4327	0.6258	5.593	7.828	8.2475
0.812	8.3007	10.2858	10.3096	8.876	6.8959	3.1896	8.0768	1.7405	6.7074	5.6082	0.4677	0.6324	9.5888	4.3098	7.5316
0.629	15.1489	8.6212	7.7655	2.7504	7.4772	1.1835	6.9204	7.0181	6.3189	2.1389	0.4705	0.6413	10.3616	5.579	11.2014
0.568	12.6816	7.3228	5.9034	5.9205	16.8227	13.6598	6.1693	9.325	6.9444	6.5319	0.4962	0.6761	18.3221	7.4172	16.3753
0.287	12.888	1.3135	7.4945	8.8812	10.7001	13.4668	7.6917	8.7207	3.5817	3.7357	0.5092	0.6895	13.2401	12.8055	13.4033
0.616	7.841	1.9142	3.8345	5.6444	2.094	6.5689	13.3995	10.4754	9.4222	1.2574	0.5136	0.7019	4.793	2.7948	16.0675
0.136	12.7767	4.2066	1.2557	9.3858	2.2731	5.5171	4.6282	11.4142	7.5268	1.8048	0.5238	0.7026	5.5619	3.7909	3.4304
0.372	3.3588	8.9087	12.9327	9.252	6.582	0.9046	16.3605	1.4422	7.8178	4.4567	0.5346	0.7067	12.8081	4.3979	10.7272
0.475	4.1843	2.7791	11.6933	16.3093	6.3276	2.5598	7.3308	3.6953	6.9338	9.6539	0.5521	0.7313	8.9093	12.6008	10.6213
0.993	3.7275	8.0203	2.0725	10.0288	5.3685	6.0012	2.0856	3.4149	7.99	11.0081	0.553	0.741	12.193	5.3345	7.4768
0.413	10.7402	3.6902	9.3432	7.5263	4.7254	9.0064	1.6825	10.3401	11.008	11.4915	0.5592	0.7443	16.3956	8.6401	7.6684
0.412	2.0173	11.3829	13.5348	7.6042	2.6416	2.9424	1.0938	9.9724	5.5632	12.7468	0.561	0.7501	3.3899	12.0195	2.2192
0.219	4.6898	12.2069	6.5201	3.6337	3.5628	1.3983	2.5057	10.7335	3.7178	12.2276	0.5766	0.7506	13.0079	7.7826	6.801
0.658	5.6547	10.199	4.9658	9.514	8.0778	5.9235	4.0356	9.343	9.9542	6.6103	0.5874	0.7585	18.4325	1.3851	9.1752
0.274	5.8159	3.8946	10.7792	10.6823	6.4739	1.2654	8.1376	3.0141	11.6852	14.9557	0.6333	0.7626	10.5382	10.6353	10.8061
0.776	7.5419	11.918	3.2223	7.3769	8.3076	2.8755	8.9557	1.1753	5.6136	8.6382	0.6526	0.7836	13.3144	6.626	5.038
0.553	9.2089	7.1933	11.5549	3.8966	3.268	4.8728	7.2619	5.7702	0.6064	6.6184	0.6543	0.7928	11.4317	10.4196	5.2916
0.66	10.4261	16.0468	3.3883	8.5773	9.0329	7.3927	11.8448	5.379	9.2708	1.6575	0.661	0.815	2.2634	9.7396	0.7043
0.329	10.9553	5.6535	11.008	6.3335	5.852	9.1805	14.007	12.7017	5.0174	7.0021	0.6865	0.8214	10.4878	10.4818	6.4015
0.279	7.7152	11.2196	6.8263	7.7004	6.6012	10.3513	4.6891	10.3791	9.73	6.961	0.6929	0.8241	9.3024	8.2905	4.6567
0.73	3.0999	11.916	2.2653	6.2403	11.6266	2.566	3.5956	9.3489	6.9316	1.743	0.7005	0.854	10.6808	9.309	7.0622
0.434	4.4072	10.3187	6.6589	11.9939	4.2765	0.578	1.4878	9.8508	4.6865	10.4338	0.7066	0.9351	7.5499	10.0578	6.9085
0.698	7.1255	7.9683	2.7027	14.513	2.6796	0.908	0.3618	5.9013	5.7526	12.0675	0.7104	0.963	7.2188	3.8363	8.5067
0.67	8.2935	2.1024	10.461	4.5118	6.7688	5.9583	7.0446	5.2654	9.6484	7.058	0.7133	0.992	5.7762	10.9813	2.0557
0.47	3.9235	4.7759	7.2857	4.9914	9.0875	8.2207	3.6908	4.876	1.3044	11.8952	0.7293	0.9926	7.6126	10.3799	6.9182
0.802	1.2664	6.9516	5.7704	6.9839	7.8321	5.2283	1.3571	6.1521	0.6064	16.0353	0.7315	1.0132	5.5608	8.1074	10.2943
0.775	4.086	6.3562	12.1434	8.201	5.9087	9.7058	1.7754	13.2743	3.6421	12.846	0.7361	1.0225	2.0771	4.7178	3.1656
0.808	11.9112	7.9451	6.283	7.9637	10.6935	6.5223	13.0642	11.4441	3.7096	6.2824	0.7396	1.0336	5.2783	4.1604	2.2235
0.373	7.6954	5.5613	8.8789	3.3547	10.4066	4.8604	14.1856	2.0322	3.9704	7.2233	0.7433	1.0344	15.1528	5.8376	2.5557
0.281	8.0369	11.577	1.422	10.6136	2.1774	1.4113	3.8073	9.1611	4.3456	10.0126	0.7456	1.0679	10.0318	11.6642	4.405
0.429	12.1188	15.8714	13.1859	10.7734	0.6855	3.8435	4.8622	0.1913	4.3959	9.4273	0.7597	1.0711	9.9611	4.3	8.5684
0.835	8.0729	0.3674	6.4836	0.8927	6.3549	10.5772	8.4791	8.0898	4.1387	7.5759	0.7687	1.0788	9.3653	6.5784	6.9345
0.777	11.9889	1.9509	6.7347	7.4474	8.3841	7.8829	9.4531	5.7451	3.2628	3.1023	0.7747	1.0852	6.8925	2.0657	8.9292
0.447	3.7951	10.8549	10.0424	5.7724	7.4552	4.4325	4.4564	7.3772	7.6065	11.7132	0.7916	1.0856	5.0786	1.7022	6.5116
0.477	15.5817	1.9947	8.0047	2.0067	6.6108	4.6323	5.4991	0.4739	7.7982	7.1486	0.7959	1.0876	9.6008	2.5112	4.846
0.359	10.6366	2.6688	2.1976	6.8963	12.1498	5.0877	4.4152	9.94	6.4748	8.9784	0.7986	1.1127	8.0313	2.4249	7.0463
0.706	9.3075	0.2353	2.4643	7.3424	12.1391	16.028	9.2223	4.0651	8.0185	9.6603	0.8007	1.1263	8.6066	7.2734	4.9811
0.509	6.7031	13.2071	7.6591	7.3542	4.8431	2.7558	9.2481	3.8017	13.6567	10.326	0.8259	1.1323	6.8958	2.6788	15.5645
0.636	8.2759	9.3613	0.1334	3.1508	2.1447	5.7782	6.9744	3.2263	6.203	11.9747	0.8334	1.1586	12.8635	9.0914	11.9148
0.551	3.049	4.278	6.13	10.443	9.1762	6.2114	17.7179	9.0334	8.4857	10.82	0.8376	1.17	2.9108	7.2321	2.3905
0.663	3.1824	3.6329	2.7326	3.4234	0.9345	1.9422	5.8089	5.3689	5.0213	7.2474	0.8432	1.1871	5.508	13.6826	5.9345
0.481	11.4121	13.3629	0.4429	5.0814	12.7748	7.878	0.5894	15.4092	8.6974	7.1353	0.8472	1.1892	16.7963	8.8689	1.8941
0.539	18.4518	6.0715	1.0174	5.594	13.0528	4.8036	3.5395	12.274	11.8022	8.6299	0.8616	1.1989	3.9198	12.7972	7.261
0.655	5.3359	15.6256	6.7517	3.0253	2.7574	9.9859	1.9585	4.8657	4.7418	9.2737	0.8697	1.2099	12.6223	6.2213	4.9854
0.722	2.5327	13.1291	7.1367	14.1247	15.8223	3.2988	1.7939	4.9969	7.8854	9.3047	0.8705	1.2221	10.4194	5.768	6.0796
0.669	3.8619	8.458	2.1978	1.749	1.4213	12.9261	6.0531	12.528	4.0887	7.0597	0.8921	1.2301	2.7156	6.1132	8.4446
0.311	2.7162	6.5447	3.3024	11.5066	9.7143	14.7133	1.078	10.308	5.8958	8.8315	0.8973	1.2361	4.7822	16.2531	4.9558
0.404	4.5113	8.2614	4.2416	8.6724	2.2076	2.2729	2.5752	4.5875	3.8878	9.9944	0.8976	1.2372	10.0312	7.3841	11.104
0.449	9.4093	15.3637	7.8057	5.7959	6.54	0.7658	5.223	4.0434	10.6211	3.3787	0.9054	1.242	3.7348	9.1025	10.0173
0.542	3.0089	3.4336	5.0546	9.3881	13.0193	11.8241	9.5516	9.6366	7.2981	7.5883	0.9114	1.2485	10.0489	4.4431	2.706
0.258	8.9487	0.8364	1.5556	9.8645	10.6463	2.3211	5.5629	5.4202	8.6042	0.6006	0.9146	1.2598	4.4668	3.6004	3.6689
0.396	4.9899	6.6372	4.135	3.9414	13.1354	8.482	6.6297	9.0873	9.0049	16.3348	0.9297	1.2849	5.7701	3.5779	5.1786
0.284	7.3656	5.1884	5.8114	9.0223	0.8545	10.2774	1.5747	12.1059	5.4288	6.0046	0.9322	1.2918	11.448	8.8491	6.5995
0.553	9.3641	2.9333	0.3296	14.4467	4.7605	10.3386	8.5413	6.8462	10.8676	9.427	0.9336	1.2942	14.9959	4.4729	2.2845
0.418	3.0332	5.5034	8.9583	8.8218	10.9852	1.8447	7.4301	5.0537	5.1392	13.776	0.937	1.2953	12.5897	9.4836	5.2195
0.26	10.0142	13.3744	1.4089	3.0523	11.6587	7.8256	7.7958	15.9884	7.8432	4.1121	0.9383	1.3011	8.005	10.9322	5.5599
0.745	11.2741	8.5022	7.2634	5.0557	6.1619	1.3441	5.4111	15.8329	8.2874	1.3165	0.9447	1.3065	10.4131	5.5679	1.6395
0.913	6.2874	1.8915	14.264	5.6893	4.0031	6.0741	9.7634	1.119	8.9498	6.7734	0.9468	1.307	10.3296	2.7383	10.3411
0.44	2.3892	9.2742	0.319	9.3065	9.3697	5.9351	12.1457	4.1467	10.0527	8.2246	0.952	1.3074	10.4158	5.1098	7.9303
0.61	7.0593	12.6184	11.0716	10.6529	7.5753	8.1172	2.0768	1.6605	12.2311	10.4402	0.9686	1.3239	9.7336	11.4417	4.0491
0.4	6.9694	8.6882	0.6303	13.9126	1.5292	6.6993	5.9881	12.1304	12.4507	0.6409	0.9687	1.3466	4.056	9.3178	7.6516
0.495	8.1969	7.1031	5.0705	3.2618	0.7087	12.2981	11.2943	11.476	4.446	9.6746	0.969	1.3526	10.9867	9.4086	4.4387
0.605	9.3631	10.9521	9.1675	8.0872	0.6073	13.5965	8.1136	2.1369	3.5216	8.5904	0.9722	1.3695	13.9589	8.4049	10.1478
0.456	9.1949	5.6079	2.7629	0.5561	6.0885	6.8062	6.341	15.8175	2.7205	7.2521	0.9739	1.3766	5.673	9.9524	14.1142
0.144	11.2688	5.6905	6.0234	2.0902	5.4082	5.8415	3.4876	2.8568	1.5196	4.3929	0.9903	1.3979	12.4767	1.2133	12.9348
0.475	1.5089	6.8833	12.8646	8.5261	9.0523	3.4014	3.2827	8.0851	8.7201	4.2747	1.0029	1.4152	6.848	8.6408	14.2047
0.424	8.462	3.4757	6.6516	1.9967	3.6084	5.0723	4.1545	6.0973	10.7672	9.7659	1.0105	1.4169	13.7614	11.1923	5.0867
0.611	4.2198	2.3434	10.5088	6.4499	4.0079	2.6093	9.1862	7.9598	9.5147	1.2163	1.0197	1.4246	9.4951	4.1257	4.2675
0.137	12.7949	4.9456	5.2597	2.8422	3.3506	14.4403	7.2151	4.348	9.4217	9.9444	1.0265	1.4596	5.3225	9.1089	3.4741
0.583	2.7877	6.6401	4.83	14.6133	6.4044	5.4778	6.9805	7.6179	6.1308	8.2848	1.0504	1.4702	12.5696	11.6262	7.4912
0.492	8.5753	9.1994	5.9024	3.9012	10.3879	3.9599	9.0553	4.589	11.1829	12.7102	1.0551	1.4799	5.9865	15.8522	7.6427
0.705	3.224	11.1929	9.7512	12.077	2.2663	5.6496	4.3733	3.9638	9.1985	9.1021	1.0569	1.48	11.6055	11.3918	7.443
0.804	6.7183	11.4256	5.9194	9.3055	7.704	9.2302	2.8914	2.9297	9.2561	4.7082	1.0639	1.4823	10.5497	13.2103	6.305
0.527	9.7795	12.4303	9.551	9.9831	4.408	3.7201	1.6276	10.2748	9.2876	6.848	1.0655	1.4993	6.1478	11.7198	6.3123
0.785	3.7461	15.0116	8.4247	3.2221	8.2459	3.7763	2.8395	6.3888	4.2873	2.46	1.0673	1.5062	1.8852	14.9518	1.6726
0.47	5.0511	4.5904	2.391	7.3027	5.9102	7.5763	12.8339	5.5773	8.2994	6.4306	1.074	1.518	7.5002	8.5596	9.2268
0.271	3.8368	10.6996	7.976	8.4019	1.4179	8.101	2.5036	5.7443	4.1943	5.3588	1.0746	1.5221	15.5154	3.5015	5.2743
0.885	17.5592	8.8405	1.6838	8.3006	1.3871	9.8469	2.6754	3.1114	8.2398	2.1074	1.0764	1.5353	9.5472	9.4819	8.5088
0.5	13.5628	8.5173	10.5864	1.3407	5.4559	1.2121	15.5825	1.985	9.1056	6.1703	1.0822	1.5357	11.0684	1.4837	9.6999
0.35	18.2176	4.7443	1.7196	4.0825	6.4143	3.1524	1.2975	2.5421	4.6782	14.8776	1.0837	1.5393	14.3338	17.0033	6.3972
0.486	11.2072	9.2217	4.2185	7.0492	8.459	3.6846	12.3923	13.2977	11.1104	10.901	1.0876	1.5492	15.1256	7.582	3.7344
0.535	6.1164	2.991	3.1562	9.2146	11.3376	4.3648	2.9691	4.7768	9.6345	10.786	1.0916	1.5607	12.3966	2.1729	11.0699
0.432	14.7299	10.1607	4.0108	13.3962	1.9962	8.1167	7.8943	4.1972	7.0206	7.6994	1.0921	1.5728	9.1927	3.8638	1.9801
0.4	8.3446	11.7583	5.0723	4.8767	14.3752	7.6454	1.8713	1.8129	1.4497	6.074	1.1031	1.5748	11.8813	10.8444	9.4488
0.624	8.5023	4.2317	4.5417	3.7121	14.6809	12.4828	6.7292	7.9654	0.7058	7.5223	1.118	1.6013	16.7039	12.7883	2.0855
0.651	6.5771	9.6915	3.111	10.4885	4.0271	7.4913	0.7219	2.1455	7.8315	5.6849	1.126	1.6036	16.3667	3.5776	10.7904
0.413	5.824	7.944	7.6028	3.3171	5.293	5.8431	3.6083	0.2665	4.598	14.2412	1.1306	1.6077	6.3346	8.3094	4.7167
0.35	5.1944	3.2105	5.881	10.0766	7.3359	4.8712	9.7014	10.9829	5.353	4.1754	1.1427	1.6142	10.5116	11.0955	5.0463
0.289	6.7425	4.6282	12.6791	17.0372	9.4336	6.3887	3.7689	1.7036	7.3228	7.0819	1.1567	1.6169	12.2944	11.6196	5.7999
0.677	3.1904	9.2613	5.3291	11.4051	6.695	5.6966	2.3551	7.4563	4.3447	5.5146	1.1627	1.6177	5.7886	5.2726	2.4435
	3.3843	12.3924	4.3906	6.9962	14.4398	10.6294	2.9588	10.5166	5.7783	6.1968	1.1694	1.6183	14.2487	15.1577	6.426
	4.6083	9.499	8.7967	7.3585	5.0923	10.7168	7.4607	12.9228	8.2195	5.6036	1.1733	1.6208	4.7319	9.6824	0.5388
	2.6089	13.6809	6.3226	2.4344	4.4009	7.4416	6.0558	7.4337	8.1754	2.689	1.182	1.6302	4.4017	1.2402	6.7244
	7.034	16.3537	6.2722	8.6035	5.9916	4.4076	0.8713	5.3272	9.7568	8.7991	1.1911	1.6391	3.0129	12.5906	2.5352
	12.7286	12.2459	7.5605	9.6737	1.4387	14.5885	11.5029	6.0585	9.7175	8.3602	1.1932	1.6685	10.3845	8.66	2.8338
	1.627	12.8744	8.5608	5.1344	4.0926	4.9336	8.3723	3.922	4.4975	2.3585	1.1984	1.6889	6.374	8.5877	1.7898
	1.7779	6.5412	8.0373	10.8922	16.3237	0.8438	8.1002	2.477	2.2849	10.4475	1.2195	1.7007	12.8199	7.1927	1.8161
	5.2781	6.6623	0.8578	8.4263	11.7758	15.2338	2.7238	8.6063	4.5901	7.1171	1.2195	1.7035	9.5688	3.1897	5.8864
	12.0652	12.5925	6.3275	2.2201	8.952	7.2879	11.007	3.0445	8.6812	4.9279	1.2234	1.7186	11.3728	3.6883	3.0251
	14.5856	7.6897	4.2623	9.9416	0.5146	4.8163	2.8057	9.7601	1.3426	4.3746	1.227	1.7221	13.4645	16.1863	1.2015
	8.7142	10.6844	6.7553	2.3804	14.4575	1.8118	8.1555	15.3109	8.6107	2.0894	1.2279	1.7823	13.7697	11.0942	6.6401
	9.4365	7.569	2.4276	10.5432	8.997	10.1379	1.471	5.9023	7.9576	5.7482	1.2287	1.7865	15.8668	6.1551	10.8801
	7.9917	5.6854	6.9909	9.6471	13.1725	5.2681	13.5096	5.5837	7.2287	8.4123	1.2351	1.7972	4.9343	8.2474	10.5196
	10.6495	6.0555	2.7828	5.1259	14.7719	6.288	3.9721	7.9674	9.2353	6.153	1.2423	1.7992	11.9636	16.9097	9.038
	8.4321	7.3191	8.3137	2.824	13.1241	2.366	8.946	14.325	4.9206	7.8277	1.2605	1.8067	9.3829	7.407	13.3491
	3.6439	6.8004	6.0063	12.5774	4.7134	6.0765	6.0547	15.8844	6.8147	7.1734	1.2662	1.8111	9.6983	5.7677	3.5877
	5.4493	13.9913	5.6367	3.4166	5.9097	16.566	2.6318	2.8628	1.4505	7.7958	1.2803	1.8484	4.4744	6.9295	8.0371
	2.9752	1.6488	9.7314	4.874	7.3775	14.0358	3.3909	8.164	8.3427	6.7246	1.288	1.8556	5.583	8.1897	3.65
	1.5792	8.3581	5.4933	9.3203	6.7289	9.2268	12.289	6.1579	4.3465	6.1007	1.2911	1.8565	9.2721	8.0697	5.7901
	11.2579	11.2801	2.1845	13.3301	6.4241	1.4914	2.8481	1.7044	6.884	4.9132	1.2952	1.8582	14.7855	8.145	7.3408
	12.4107	10.6963	7.8029	10.0621	3.1172	11.6173	7.0466	11.213	9.0225	4.2028	1.2965	1.8846	7.423	12.4952	9.8982
	3.5033	3.1136	8.4139	25.5664	1.4555	11.7534	4.6957	2.1363	5.4672	3.5683	1.3037	1.8878	12.7561	5.4021	4.0163
	7.8431	9.0871	6.1574	24.2326	1.1701	3.3106	9.0536	3.646	4.7929	2.1124	1.3043	1.9063	9.9211	2.6879	11.525
	9.2276	8.7367	10.5291	7.2295	16.2799	6.9255	9.7424	12.6474	10.6182	10.0057	1.3184	1.924	2.0069	12.9395	7.4882
	5.2283	12.1471	10.5804	10.0404	0.8127	12.0266	2.0405	16.7103	10.7725	2.6965	1.3286	1.9287	9.1037	1.9498	5.1417
	5.5456	3.3216	2.324	4.4957	0.703	12.5191	6.2108	8.7827	11.039	5.1558	1.3322	1.9364	14.3718	7.6163	9.0007
	6.171	16.9977	3.1334	8.2654	5.3603	12.1761	1.8094	6.1315	7.678	6.6176	1.3331	1.9375	16.1034	8.3172	3.1547
	13.3736	9.9535	5.7391	4.8923	1.2342	8.7941	6.9815	1.8813	9.1173	3.7956	1.344	1.9392	15.2055	14.1797	11.7941
	9.8377	3.3094	4.219	2.2776	2.315	9.4654	0.1773	2.1695	5.4089	13.2612	1.3695	1.943	20.1467	4.995	4.0566
	3.2473	10.7081	1.9124	13.7153	4.1752	13.7691	4.9431	12.0871	12.7789	14.8705	1.3723	1.9642	13.587	4.9551	7.3732
	9.8719	5.7297	6.9861	8.6517	1.9261	9.2178	8.6143	9.2156	9.079	10.046	1.3821	1.9804	2.6018	3.3681	9.6907
	5.2905	12.2413	3.7618	5.1491	11.1056	8.8626	6.9194	4.7402	9.7139	2.0502	1.3963	1.9849	9.0946	12.2093	3.7837
	1.5723	3.5858	3.0241	7.3553	10.8849	1.2639	3.7646	6.5921	10.607	3.9484	1.4055	1.988	9.5131	1.7725	3.3765
	6.8066	12.4095	6.0535	7.7452	6.4187	4.5579	3.6533	3.0315	3.9137	9.6769	1.4091	1.9998	11.6706	3.6438	6.0207
	12.1557	14.5396	2.6943	9.5178	9.0895	3.7194	9.1903	8.3461	0.9425	3.6001	1.4148	2.0045	6.3162	1.8066	5.0214
	15.3222	11.0027	5.5179	8.4991	6.8314	3.222	2.7553	4.6592	3.2853	4.8399	1.4233	2.0177	3.9176	7.2584	4.8033
	6.9634	9.5506	6.2539	4.7953	8.6168	3.5401	3.9003	5.7249	5.1457	9.217	1.4241	2.0829	10.8281	3.9678	6.0725
	5.6118	6.6345	4.8778	7.5666	5.4172	4.5277	0.1205	8.2706	5.3386	8.2978	1.43	2.0977	3.8736	9.846	1.3664
	9.6715	3.1843	6.0179	8.6262	3.3439	4.3103	6.5233	5.4322	3.3324	8.232	1.4326	2.1188	11.1121	12.7912	4.7214
	6.7646	6.7933	7.4098	10.7668	6.7133	11.3155	6.5066	11.974	2.4447	7.4718	1.4459	2.1297	2.9512	3.0353	5.4017
	8.2949	5.546	5.8422	3.6654	1.9306	12.5875	5.3202	4.0085	8.3905	10.2924	1.4486	2.1419	14.8762	13.1871	7.8949
	10.3681	8.8825	8.3349	13.1596	0.9644	7.8844	6.5224	10.245	6.6124	5.4669	1.4511	2.1483	7.8538	6.4259	6.4893
	11.0694	9.7264	4.5004	4.7834	13.4768	16.3092	2.6043	6.9985	8.9675	10.3208	1.4567	2.1506	3.2865	3.7791	6.886
	5.5261	6.1028	6.8377	12.0364	0.6019	8.8398	3.376	5.6129	1.2887	13.6081	1.4627	2.1539	5.9063	9.3855	3.0697
	10.902	5.2172	3.107	8.0417	4.4178	1.3614	2.9156	9.6253	8.834	10.7045	1.4655	2.1683	15.2117	6.6991	2.4966
	9.9938	0.2821	8.3244	6.6245	2.7491	11.9558	6.083	11.5	10.1814	6.6628	1.4664	2.1691	10.651	3.5591	3.5306
	13.1408	10.8553	12.1434	7.1161	13.6178	10.7923	5.4778	1.8728	2.5632	12.5035	1.4779	2.1807	14.3318	7.5305	1.6445
	15.3509	9.1715	3.4327	10.589	6.5612	15.1329	3.1612	11.4681	4.8029	5.4573	1.4853	2.1828	13.4568	2.3735	8.9088
	18.8053	3.8589	7.8504	3.4901	4.143	8.4871	7.0155	13.6128	9.1725	11.9901	1.497	2.1846	12.0278	4.1115	5.0412
	9.3383	12.2211	8.803	5.1861	6.5751	13.7743	4.9911	3.1709	1.4423	15.6727	1.5012	2.2	6.7112	9.8065	10.3672
	8.5883	15.4896	8.2228	1.5029	4.8825	12.2175	11.5494	3.8127	2.891	3.3315	1.5045	2.2357	4.041	2.3059	10.4448
	5.1049	9.5536	5.4128	3.2897	0.7242	2.7765	1.0363	10.2147	3.9055	9.3382	1.5062	2.2405	14.5396	5.3063	9.263
	9.1778	15.2179	10.6232	11.086	6.8315	8.0316	2.4951	10.6069	5.3733	7.2293	1.5093	2.2439	8.7516	3.1037	6.4034
	14.8939	8.8928	11.0792	2.5481	9.5994	4.2878	7.6101	12.5699	1.4669	2.5014	1.5121	2.2452	7.0881	13.0042	1.1195
	12.2229	5.5998	1.7557	2.2741	1.4305	5.1003	3.9275	4.6748	10.2689	10.8243	1.5129	2.2492	13.9062	6.1892	2.5173
	13.0656	11.7373	1.8168	6.767	5.0241	11.4336	6.3266	11.5654	13.7694	11.9218	1.5138	2.269	9.4144	3.7361	15.8377
	6.7448	6.1367	6.1104	10.645	0.3592	14.8282	2.8288	12.8561	8.8626	15.2661	1.5216	2.2882	7.8029	9.3251	6.735
	6.8304	9.3794	7.1956	3.5472	2.0632	8.4988	2.3745	4.124	6.094	4.4608	1.5235	2.2948	12.9206	2.7575	9.1634
	13.6646	9.5726	5.512	9.9835	2.0699	12.6614	1.0743	3.696	2.3945	14.1119	1.5296	2.2962	10.9483	6.1316	10.5059
	15.211	7.4322	6.7543	7.4472	14.8236	10.655	6.764	8.5054	7.6602	7.812	1.5385	2.2974	14.4023	15.9109	4.0683
	18.8239	9.1678	7.3287	8.7178	1.0106	1.1192	8.6335	2.5736	1.896	5.5595	1.5451	2.301	11.2557	16.7995	5.2952
	5.8775	6.5143	10.4861	11.4223	1.0245	6.6821	7.0407	4.239	7.1726	2.0931	1.5502	2.3028	7.7831	6.6895	8.1471
	13.6528	5.9156	7.8693	7.5742	3.8344	5.6175	1.6109	0.997	6.8461	12.8582	1.5763	2.3122	4.1167	7.0672	13.3248
	0.7692	8.5843	7.1138	5.5751	1.475	5.8381	11.9928	1.4757	7.4677	10.1549	1.5766	2.316	9.1346	8.4351	9.3072
	2.5918	6.9402	2.1979	4.5438	1.0495	8.294	2.7086	6.3926	7.3605	11.7235	1.5931	2.3171	14.7706	1.293	17.1807
	6.4137	10.167	9.1536	8.7229	8.5798	12.3674	3.5663	3.0281	10.6393	6.6684	1.5945	2.3211	7.1613	11.9566	0.8992
	10.5604	6.4764	3.8785	5.0481	5.6562	9.1978	2.6601	6.8812	13.4382	4.6574	1.5969	2.3533	7.0647	9.7288	5.9218
	8.4869	1.1187	1.8227	8.9536	10.3978	2.8181	2.5359	15.4872	4.8741	8.9929	1.5971	2.3574	9.2458	4.2725	10.9724
	2.5359	9.1969	1.6304	3.1654	9.9044	3.7014	5.4919	5.5205	5.0151	9.6059	1.6002	2.3585	1.6678	4.4414	10.5739
	5.37	6.5544	5.4684	8.5273	10.711	10.3372	10.3629	20.3819	8.0916	8.061	1.6022	2.3669	3.7374	9.6642	10.3596
	15.0516	9.2484	8.4466	7.6021	10.3004	2.9448	3.6902	4.5282	7.5661	5.023	1.6027	2.3676	8.3542	14.2399	10.8041
	7.8687	15.2329	10.0693	3.8422	8.2198	4.5261	7.177	8.6234	15.9423	11.1492	1.6076	2.4185	7.1692	10.7936	1.5151
	2.9304	9.8649	6.3004	5.6786	9.6309	10.839	7.5958	13.5143	1.2925	12.0926	1.6255	2.4222	16.3791	3.0923	3.6892
	5.633	3.2168	10.5241	14.4437	1.4873	11.7772	7.9753	13.4756	13.1198	3.4573	1.642	2.4301	0.6818	7.833	12.8063
	3.9951	2.291	5.2426	10.6546	3.2644	13.8766	6.9301	10.8625	7.9899	9.2137	1.6507	2.4453	10.5807	4.1809	7.5842
	4.6605	6.1609	7.7549	8.1438	8.384	7.9327	5.1518	2.711	9.7213	12.071	1.6539	2.4567	5.6274	7.1225	2.4264
	2.3351	4.5745	5.9415	12.1353	3.6265	3.7881	4.8282	5.9798	8.1188	2.0326	1.6544	2.4592	16.579	8.787	3.1395
	5.7555	12.2368	4.8742	7.1428	6.3562	0.1738	10.0189	12.0106	6.6194	12.7654	1.6652	2.4683	7.9502	10.1603	5.9009
	12.1721	12.4926	3.9468	8.2161	5.3713	9.6385	6.7608	18.3565	2.262	7.7446	1.6798	2.4715	19.1025	6.7072	9.8011
	8.303	10.8584	5.3873	8.2225	7.392	13.2751	15.3642	2.5269	1.5267	12.2194	1.685	2.4805	2.7854	7.0311	6.8333
	10.7566	6.0645	7.9176	7.5549	15.354	10.3824	3.654	13.1448	5.0084	2.7763	1.6894	2.4828	4.5369	12.3224	3.8977
	3.4097	2.9547	2.4285	5.6398	3.0138	4.0678	7.9812	7.94	1.3823	18.5471	1.6911	2.4909	11.3957	6.5856	8.7744
	6.3686	6.4372	9.3093	5.934	7.0789	8.8707	8.1813	3.3662	7.3814	18.5867	1.6946	2.4929	2.6341	13.6404	10.5702
	6.2398	7.3711	1.2452	8.7201	11.489	7.1515	2.6474	11.0258	4.0414	5.6165	1.6991	2.4934	17.7838	4.7481	4.4212
	7.8165	10.176	5.2081	15.1686	7.5834	2.6378	1.9857	13.1032	3.6987	7.7256	1.7014	2.4951	14.5325	11.4146	6.0276
	8.2991	8.823	3.2238	9.3156	10.0295	4.1675	0.7387	18.7256	10.34	12.6033	1.703	2.4977	11.3093	2.1296	3.7327
	11.4496	14.6041	3.2594	10.8907	13.337	12.7223	1.2304	21.0724	0.8633	2.3663	1.7107	2.5312	12.6092	2.9365	5.604
	3.3867	14.4078	2.5988	7.7152	8.5319	13.6994	9.2781	10.0637	10.1099	12.3088	1.727	2.5335	10.1287	6.4002	3.0629
	4.3077	10.7166	2.6812	12.3554	7.6993	10.5637	4.7822	8.3363	9.0123	7.7506	1.7274	2.5472	8.4127	16.1457	7.1413
	8.8825	7.5844	9.9872	14.8693	8.8774	9.3967	5.0875	5.9091	6.1063	8.0161	1.7283	2.5642	13.5208	11.1525	6.1588
	8.638	4.4606	8.2349	4.1793	8.949	5.2941	4.2844	16.5288	6.29	5.3418	1.7327	2.5676	12.4389	7.2931	5.5444
	12.6833	10.0363	4.1148	2.0611	8.4262	0.4936	8.8187	7.7889	10.5173	3.3388	1.7389	2.59	10.7545	4.2136	15.1292
	2.8412	0.6136	6.4143	3.3669	4.8811	10.2019	5.9341	6.0968	3.5338	3.8607	1.7429	2.593	4.9856	5.6953	14.3103
	9.6675	5.1456	2.6145	13.8513	15.1885	4.0045	2.2054	12.8639	9.2956	11.0373	1.7444	2.6052	6.9713	12.2313	13.5014
	9.2011	6.7233	8.2956	12.9805	7.9312	11.878	2.3507	5.3677	19.698	14.6147	1.7477	2.6185	6.4762	3.374	13.3044
	8.9783	7.3873	9.2771	6.0761	9.0383	8.6621	6.3129	7.1959	6.672	8.1208	1.7482	2.6235	12.5993	1.8301	5.4438
	6.096	3.5156	11.2569	7.5389	2.0519	5.9377	9.5789	9.5154	6.1197	9.6261	1.7541	2.6256	7.2345	4.9977	9.6784
	12.4688	11.1904	4.9129	8.2565	5.6341	2.6677	0.8115	2.6515	12.8752	6.9027	1.7549	2.6343	7.5283	11.8776	5.2337
	17.153	5.7137	1.4216	6.1287	2.5204	3.6325	10.13	7.2261	1.3855	18.257	1.7556	2.6371	13.5582	4.5502	6.6589
	9.4455	5.7378	11.923	10.0495	11.007	8.3137	4.2285	10.0332	10.0804	12.793	1.7587	2.6386	4.6468	6.2667	12.0699
	8.2344	4.7472	4.8628	3.9952	8.1033	2.1889	4.8384	8.2944	8.0727	13.7606	1.767	2.6447	5.5024	1.4919	9.7114
	8.2439	13.716	5.1659	9.5594	8.5308	8.843	8.4494	6.1933	2.753	5.9891	1.7761	2.6595	11.3796	8.7852	17.0108
	6.5351	2.5376	6.558	4.4335	7.4883	17.1263	3.7378	10.2518	4.4812	6.7045	1.7794	2.6606	7.0462	2.1663	10.2046
	5.2323	8.7835	8.1056	3.5246	11.9174	7.7122	1.9222	8.2633	10.835	5.0235	1.7797	2.6844	8.9596	6.2129	2.091
	12.2167	2.4912	5.0154	3.0341	11.6194	8.0863	4.4647	2.5722	8.6358	16.5819	1.7834	2.7174	6.8245	6.1211	8.166
	10.4538	11.2677	2.3032	5.4015	8.7493	8.1893	4.5474	10.2102	11.1778	9.748	1.7843	2.7353	12.2515	9.2953	12.0001
	8.5707	13.3933	6.2732	4.9842	18.313	6.6249	12.8153	21.2546	10.3856	2.0641	1.7868	2.7385	3.6316	2.7193	5.7339
	9.3767	12.4423	3.7191	12.6738	4.668	5.7067	2.9696	7.0144	12.685	4.6109	1.791	2.7475	14.5112	5.9553	2.6918
	5.8228	2.8463	2.8677	6.3065	7.0705	5.9957	1.1839	6.9253	14.2727	9.0332	1.7935	2.7478	8.2723	7.5655	5.7903
	6.9969	9.341	4.7707	5.8309	5.464	7.5936	2.0727	7.5747	11.0991	5.9111	1.8006	2.7636	9.0519	12.2648	4.4231
	8.5989	5.6329	4.219	12.2608	2.0741	4.8949	6.6445	8.0966	10.5677	7.6557	1.8055	2.7653	3.3559	12.5481	3.8437
	11.2198	16.1268	11.4768	3.9318	9.3183	16.3233	0.9807	7.1931	8.4876	4.6589	1.8137	2.7758	9.8623	3.1063	12.1325
	8.6073	5.3194	10.4072	11.2975	1.8126	5.8083	4.5215	5.7531	9.562	4.4368	1.8195	2.7964	9.295	7.4455	9.6295
	6.938	11.855	9.5827	6.4714	11.6989	8.2937	4.7314	5.5379	11.5046	4.5215	1.829	2.8057	7.6698	5.8857	3.182
	6.3358	13.3557	2.7833	8.034	11.4044	17.3549	6.7304	5.4868	6.6889	7.8728	1.8369	2.8101	13.1653	5.2828	11.3319
	6.627	4.8296	12.0138	1.9774	6.5863	12.3096	2.0415	3.5776	6.0154	22.1013	1.8488	2.817	15.3862	5.0567	0.9843
	3.3139	3.2588	7.2619	9.4964	12.0763	10.3807	8.6739	9.27	12.2368	8.9208	1.8577	2.8255	13.9026	9.5465	9.9729
	12.7151	5.6809	4.3207	14.3326	4.6454	12.7563	6.8074	15.6129	7.3338	10.9573	1.8579	2.8265	1.7287	9.8933	7.2784
	2.8728	3.8287	12.6644	4.9729	8.0884	6.1963	0.6379	6.8655	6.2101	5.5746	1.8786	2.8297	13.4967	3.8608	2.3459
	9.675	2.9693	5.2248	7.6909	9.9131	8.101	1.9429	5.1297	7.1053	3.1755	1.8871	2.8309	11.9305	6.7353	3.8802
	9.1929	3.7332	5.4317	6.4294	10.4912	6.5338	4.5962	3.4858	5.3069	7.2661	1.8889	2.8373	8.0115	3.992	6.3141
	9.014	9.1422	9.127	12.5023	5.8626	7.8182	14.6309	10.2537	4.7061	10.2809	1.8951	2.8373	10.1761	12.3505	6.3948
	6.0913	7.3335	4.9209	6.4196	8.5204	6.2146	5.4402	2.1822	7.2288	12.1604	1.8951	2.8627	7.5226	3.67	9.0902
	9.4238	10.2402	5.16	13.7987	7.6244	11.7472	8.4099	10.5848	8.0435	13.1525	1.9015	2.8637	14.9314	1.2013	2.186
	8.2303	3.8756	4.7044	12.4667	10.1134	9.8598	12.5838	1.8598	4.0591	7.2814	1.9043	2.8674	12.6129	5.1809	5.0323
	6.2664	6.754	5.9235	1.9829	9.9091	12.8353	5.994	1.713	3.406	2.6785	1.9148	2.8843	10.7788	1.1547	7.8844
	10.8054	11.6884	4.4083	10.9572	13.6919	5.7897	0.3937	5.6497	4.4649	3.8848	1.9169	2.8893	14.6328	3.1224	14.4168
	10.4509	13.4375	5.2114	7.6641	2.5158	14.1098	8.5049	3.0806	4.856	9.8068	1.9229	2.9008	12.9797	1.2349	3.677
	8.5224	4.2859	10.8006	1.3043	6.3566	13.2454	3.3039	0.4029	3.4785	9.5043	1.9369	2.903	11.9602	10.0704	2.3928
	9.426	11.133	11.9557	11.3456	9.3582	8.2615	11.811	8.174	8.3685	6.7329	1.9432	2.903	12.1979	9.7049	13.8171
	5.8632	7.7727	12.3247	12.4844	19.7556	15.2111	3.0184	11.0859	5.6465	5.1956	1.9459	2.9081	7.2042	7.4556	14.5168
	9.2899	1.2736	4.5197	9.4507	3.4053	2.5455	5.4912	6.3782	5.8771	2.9507	1.9551	2.9172	8.6005	3.4039	5.0212
	8.271	0.5313	4.3877	2.2838	6.4346	2.4099	5.688	12.1393	6.2955	5.9727	1.9628	2.9295	14.1419	14.3835	5.0598
	5.401	16.3426	5.0985	12.4417	13.1998	10.2894	8.8456	1.6946	5.7262	3.3539	1.9716	2.937	3.2671	8.8138	5.8526
	6.6026	11.3376	9.0521	10.6762	6.1284	11.269	2.8246	3.853	9.1046	8.3318	1.9721	2.938	8.8681	11.8846	13.5394
	9.6082	0.8064	4.2526	4.9078	7.0311	3.1795	9.6552	2.6351	14.9526	5.7595	1.9723	2.9446	5.2786	5.8852	11.2356
	13.5296	3.3092	8.4431	8.9874	6.601	10.6835	6.951	7.1055	5.3151	5.7369	1.9726	2.9511	7.8328	5.4793	3.1839
	8.514	2.1286	10.7207	11.8106	2.4312	1.2196	32.1484	6.8387	3.3925	10.9101	1.9797	2.9769	7.7674	7.5609	4.6739
	8.4706	3.8461	17.1152	10.3744	12.2229	1.478	32.6887	10.8929	8.7936	8.1121	1.9861	2.9831	11.7122	5.5502	2.8871
	13.5281	15.165	4.9953	1.4557	2.4156	9.8583	6.2952	4.5252	3.3612	11.4857	1.9909	2.9859	9.2388	8.0355	12.2343
	11.4099	16.1188	8.9155	8.2245	14.5994	2.1046	6.5327	15.1225	6.6993	2.5501	1.991	2.9887	4.9392	4.9244	7.1176
	10.7919	8.4712	12.8495	5.9003	7.8557	4.0269	8.1142	7.1986	2.863	12.3818	1.9925	2.9918	10.8031	8.7056	6.6345
	4.7916	12.0701	0.659	4.708	7.9472	3.7145	5.7532	6.3034	8.3127	6.9574	1.9936	3.0054	11.3551	3.5907	2.9906
	12.3254	9.0678	6.4637	3.5939	8.5863	4.1807	5.3359	4.4071	3.3784	9.9842	1.9982	3.0101	13.1251	4.7594	5.9809
	11.2398	10.5284	6.9538	6.8656	12.5711	5.935	5.9771	1.2415	4.2202	3.5182	2.0004	3.0225	6.9377	9.0213	11.5466
	11.1804	9.4039	9.6664	6.4775	6.5276	6.6587	10.8302	3.7128	5.5799	18.3774	2.0048	3.0307	12.5272	15.1328	6.211
	7.5617	6.6624	4.9489	2.8631	9.5834	3.2066	1.4427	2.3683	5.8057	19.2431	2.0051	3.032	8.1232	7.9387	6.5201
	5.2342	7.2293	7.1714	6.9014	12.4907	8.1696	2.6475	10.4307	8.0335	4.0924	2.0064	3.0474	4.6922	5.6894	3.1671
	11.3295	7.8236	2.6801	12.238	15.0616	6.4565	0.837	14.6235	9.3465	9.5005	2.0075	3.0511	5.8326	7.096	5.1735
	5.0746	12.9566	1.7505	3.4198	2.9239	11.8969	5.4025	3.6804	7.2528	15.1508	2.0078	3.0645	10.3159	7.9707	11.4081
	2.3939	13.4658	11.5219	15.4273	4.1015	6.5887	4.359	14.5382	4.1203	12.6788	2.0084	3.0807	3.4855	11.3078	5.2665
	7.8542	11.1179	7.24	18.4615	16.9456	4.0891	7.956	3.1368	16.0949	11.1556	2.0091	3.0864	9.1032	6.993	8.7684
	3.9745	3.0427	7.2576	15.4205	2.0489	6.0187	6.3773	4.4882	8.6958	7.1499	2.0151	3.0918	4.5916	6.2799	5.8954
	10.7663	12.8793	7.6848	12.9233	4.3464	7.9723	2.9263	13.0263	1.2257	2.6655	2.0212	3.0965	4.4265	6.4148	9.6798
	9.3147	4.0198	2.4914	13.9537	11.6729	8.0024	8.1361	16.6608	9.9493	6.1218	2.0254	3.0991	13.8527	3.2702	4.3496
	12.34	11.2989	7.8706	3.6465	6.4058	8.3674	6.3938	5.8464	1.1599	10.9449	2.0267	3.1112	15.1303	12.4828	8.7751
	6.8237	3.7646	5.3569	5.5438	1.277	8.7449	4.1168	9.3109	12.8086	7.0546	2.0341	3.1183	12.2537	14.6526	7.637
	7.0379	8.5168	3.395	6.6492	4.2662	2.64	4.7859	13.067	7.6325	2.8744	2.0352	3.132	10.3183	13.1757	9.6598
	7.8043	10.7408	6.7557	2.3815	0.3778	3.1791	1.6923	14.0807	8.6134	4.3787	2.0391	3.1403	3.2451	9.0171	2.4174
	15.3036	6.438	5.5511	14.4095	9.285	17.7243	1.9664	8.6126	14.0124	2.3431	2.0452	3.1439	5.3659	5.7277	2.5872
	10.4472	5.2808	6.2871	4.9939	9.2455	11.2983	9.823	3.1995	9.7202	8.5874	2.0489	3.1646	1.4548	6.8539	4.1175
	5.5816	12.2338	5.9375	8.3737	0.7078	11.7465	4.1982	14.9784	5.9283	8.4894	2.0558	3.1661	13.6289	5.2332	0.5587
	9.8331	4.0834	6.0565	4.6808	10.4555	4.5968	5.7631	11.5531	6.5605	9.6991	2.0561	3.1686	1.7912	7.6286	11.6117
	6.1752	15.5414	5.8242	6.0145	12.8811	0.8226	9.623	16.28	8.5187	6.4759	2.0569	3.1723	15.3116	5.0017	5.7808
	10.5531	9.2144	5.3762	8.3448	1.3348	0.7521	7.1494	5.9142	9.4093	4.0685	2.057	3.1764	15.966	11.6521	4.7089
	4.4187	20.9053	1.5455	5.3637	13.9031	0.2415	8.9915	12.636	2.2914	10.2373	2.0643	3.1808	5.7874	11.6197	8.1005
	2.471	16.029	5.1049	4.5906	0.57	7.9822	4.695	6.0203	0.7237	4.8108	2.065	3.1873	4.5748	8.1623	7.9787
	7.5213	4.4888	10.2939	5.1137	12.0419	1.7843	8.743	3.7496	12.8407	10.591	2.0684	3.1942	4.1566	12.5391	8.1436
	6.7207	13.2036	11.7139	9.7563	13.8608	8.6693	3.1822	13.656	10.0538	9.6576	2.0726	3.1978	5.206	8.0459	9.5034
	7.7901	1.9814	7.2238	9.2201	0.6946	5.4384	4.3531	7.9444	2.5192	5.8969	2.0808	3.1989	11.4243	3.22	4.8633
	9.1657	6.3294	3.7898	1.3305	3.7214	5.4023	3.047	9.1836	2.7468	4.5055	2.0831	3.1992	4.2868	7.2093	2.5134
	7.3488	0.3743	6.096		4.9981	7.8539	13.1342	8.3397	6.514	11.7055	2.085	3.204	18.404	3.7924	8.4224
	2.5459	1.1604	8.4388		3.4451	8.2794	8.6649	6.1761	13.155	11.0428	2.0926	3.2127	17.735	13.009	9.3268
	9.4348	2.7029	8.1034		8.3914	3.5953	3.4616	10.2601	6.9536	5.6009	2.095	3.2199	9.4996	1.7664	2.9008
	4.5412	6.43	2.5331		8.6189	7.9088	1.3575	18.0399	4.8167	11.0865	2.0953	3.2226	3.7759	10.4223	8.0101
	2.5777	12.1545	4.3107		6.9005	7.3229	8.1105	11.5299	1.5434	3.9857	2.0994	3.2259	11.9408	7.5701	5.6208
	8.1109	3.4513	8.056		7.955	0.3843	4.3781	1.1418	2.6033	10.4806	2.1009	3.2363	10.9467	4.0269	1.9364
	8.8922	8.9109	2.9148		0.6727	4.5067	7.7659	5.3544	5.0791	4.2107	2.1138	3.2412	12.1063	1.9801	12.9514
	4.3865	8.8083	6.0257		10.0751	4.1582	9.2539	6.7878	6.1284	8.9983	2.1229	3.247	8.8934	9.4129	10.7774
	8.5	6.3022	2.187		11.6742	0.1613	0.9648	12.1308	8.1964	17.0975	2.1357	3.256	11.5592	7.6787	5.0872
	11.2727	5.2756	4.5068		6.6413	1.5982	1.6161	11.0266	3.7408	16.1541	2.1423	3.263	5.4473	6.4671	3.5794
	5.883	8.3924	1.552		4.1034	5.0275	5.2962	17.7094	12.7271	4.7944	2.1469	3.2699	8.1293	9.9573	8.3561
	4.3797	5.3737	7.6766		6.4876	5.1657	14.9164	20.5556	11.6872	10.6433	2.1524	3.2743	3.1399	3.1126	3.6184
	6.2396	4.9357	2.1241		11.4484	12.3292	7.5185	10.0064	4.2568	8.5803	2.1556	3.2913	9.8469	9.5247	3.3886
	2.3073	10.5306	4.9721		2.9165	10.683	5.3819	7.721	1.811	1.892	2.157	3.3025	11.7199	11.1151	4.04
	9.2633	10.2945	8.4837		9.7634	13.0648	7.5657	7.9124	11.1839	3.0709	2.1592	3.3036	3.7642	2.9736	3.9601
	12.6461	5.3672	10.5235		3.5335	8.8055	1.7274	16.7314	9.4406	7.9545	2.1603	3.306	1.3381	7.6312	1.1871
	12.3832	5.0942	2.5078		6.723	5.1915	5.0078	14.9229	7.3521	12.4685	2.1612	3.3079	15.4503	4.313	8.294
	12.0888	4.4665	3.8664		0.9629	14.9892	1.4087	16.2691	3.5311	13.8578	2.1632	3.3099	2.8293	5.3215	11.0001
	11.2059	14.5482	5.5641		8.923	14.3588	1.8919	7.954	4.6911	14.9847	2.1675	3.3279	6.8055	7.8503	5.4913
	7.5831	6.6703	2.9223		7.7902	1.586	4.6908	3.6298	5.3634	4.9442	2.1751	3.333	19.2906	3.3503	6.7135
	8.4492	4.0011	4.3609		11.7768	13.4484	3.9828	3.7893	6.109	10.8802	2.1762	3.3479	10.7337	12.9118	3.6914
	6.6798	7.2919	8.0614		13.1689	13.4823	10.1609	3.6362	6.9937	6.684	2.1775	3.3526	7.4653	3.9631	9.1164
	9.6416	4.2964	8.4933		11.0081	4.7103	2.5793	1.8025	8.8973	6.4266	2.1781	3.3646	11.3799	11.2046	13.291
	5.5465	5.3042	2.0917		3.7705	15.7233	5.0915	7.8186	6.3534	7.7992	2.1808	3.3703	1.1557	3.4299	12.9557
	3.2975	3.2903	6.0024		7.0523	15.3992	11.3182	10.8028	8.7734	10.014	2.2015	3.3858	9.6517	5.7772	5.337
	4.8224	5.1716	3.0501		9.3361	9.8419	3.4102	2.8249	3.2551	6.7567	2.2088	3.3911	7.3531	1.3638	7.3741
	10.2776	5.9586	2.4388		12.6184	1.2138	1.2228	8.6468	3.3089	10.5873	2.216	3.3939	10.3818	7.4085	6.9262
	11.2207	11.078	3.1865		13.5516	11.6794	4.9478	5.0637	8.7405	5.159	2.2209	3.3943	7.1136	6.7773	10.2997
	6.3344	9.5095	3.963		9.9443	10.9137	10.5061	5.957	4.0219	11.5464	2.2232	3.3969	10.4029	2.4376	6.3614
	4.2096	3.5773	3.9431		12.8567	8.4166	7.607	0.2602	10.4538	10.0809	2.2257	3.405	6.4015	6.995	4.0989
	8.8182	4.3785	4.3952		9.4333	11.9166	10.4069	1.2668	2.97	12.8394	2.2277	3.4369	11.8915	6.1825	6.2209
	2.0748	10.1092	1.2393		20.9515	8.0094	4.9106	18.1602	2.1807	5.7618	2.228	3.4469	9.8543	9.7917	6.7496
	11.4543	7.4886	8.9823		3.8736	12.1454	4.9672	9.3417	10.0064	10.4913	2.2298	3.4503	9.3913	4.7739	12.7742
	6.0248	5.6472	4.7588		2.3359	12.9135	14.8105	8.035	3.9278	9.2978	2.2312	3.453	6.8228	6.0812	1.5166
	3.2727	10.6186	7.2534		1.015	6.1208	2.6969	10.3746	4.6819	9.6904	2.2387	3.4642	10.0454	5.0685	6.825
	13.9701	11.7357	4.392		11.26	9.2763	12.1218	12.6529	7.7137	11.349	2.2407	3.4642	12.8001	5.0688	7.2841
	4.5085	4.1554	9.1303		0.9826	17.7198	5.0897	8.0337	4.9611	7.2873	2.2462	3.4793	7.3726	6.9228	11.548
	7.331	6.7411	8.2052		0.6074	8.0056	0.7932	4.554	1.471	15.4983	2.2567	3.488	16.9974	4.2367	9.7911
	9.6387	10.9069	6.5277		6.8596	3.849	3.4291	6.8453	9.4654	13.0963	2.2693	3.4888	1.2599	6.6369	7.25
	6.506	3.6309	8.3688		15.9445	8.9219	3.9581	14.6383	3.5872	8.7923	2.2708	3.5069	10.786	11.0426	6.3328
	4.5076	5.3901	2.4114		12.5115	13.9705	7.9352	10.4096	7.6401	2.5131	2.2719	3.5102	4.7061	10.7448	6.05
	6.9438	4.3291	3.275		11.8279	9.3258	4.6057	4.1704	7.4228	5.3492	2.2743	3.5294	3.4557	9.2782	8.4287
	2.7364	10.0095	9.8847		7.5052	9.8125	9.1819	3.1202	3.8807	9.9228	2.2814	3.5419	11.6319	3.5573	3.8478
	5.271	4.4857	4.6558		7.5392	14.1629	6.1804	9.3599	3.2562	10.2552	2.2829	3.5538	14.9764	1.662	6.2508
	4.6719	13.8919	9.8558		6.7207	10.2339	12.8657	11.6378	2.6878	8.6572	2.2837	3.5729	2.3746	8.9701	4.7754
	2.5301	10.2071	1.907		1.6326	2.4375	13.3924	8.575	2.388	7.1525	2.2842	3.5732	0.376	6.7921	9.1163
	7.9334	6.8626	9.769		11.6424	3.9016	6.103	8.1644	9.032	9.24	2.2935	3.574	15.7543	6.2429	7.5452
	7.8188	7.734	6.3396		4.1835	11.2976	7.0582	2.3	5.3181	7.695	2.2946	3.5783	4.8621	4.086	2.001
	7.1659	9.7063	3.0409		2.9899	2.2571	9.545	9.2533	11.7806	9.1457	2.3042	3.5796	5.7182	6.4068	2.8787
	10.1922	5.3194	4.9762		9.8918	18.0205	1.2532	0.3621	2.2275	1.6886	2.3099	3.5898	6.4857	4.1467	6.152
	7.8312	9.0072	5.2215		8.4834	4.5139	11.9833	2.2419	1.1475	11.0702	2.3164	3.602	4.8254	3.1719	4.2947
	7.7565	10.9917	7.5605		13.6049	11.184	9.1602	4.877	3.9622	1.7684	2.3239	3.6075	10.9347	3.2564	3.0189
	6.4355	13.1376	4.1046		4.7086	8.4105	11.5209	2.3995	6.9439	5.2975	2.3241	3.6209	17.3327	7.0474	4.4858
	6.3789	14.8138	5.9211		4.8779	6.8164	3.0604	0.5206	6.155	4.9155	2.3244	3.628	14.2048	5.8276	3.5045
	5.7223	5.0628	3.9286		3.3849	11.6369	4.2578	5.2164	4.2511	7.5511	2.3257	3.631	8.7187	0.8388	4.6383
	10.7236	7.926	3.7824		8.3223	3.3855	6.4692	7.6529	6.0872	3.3489	2.335	3.6419	5.5499	6.1557	3.161
	10.8333	12.4007	8.7022		15.0511	5.8582	15.0932	7.2779	4.3524	9.1213	2.3358	3.6438	7.7326	3.4203	13.5323
	8.8028	15.532	5.5507		13.8056	12.1229	1.6965	7.0034	2.2372	3.369	2.3533	3.6515	10.9215	6.3089	7.5021
	3.9204	4.6888	5.6745		9.3021	6.5443	7.3425	4.878	9.2044	11.8899	2.3576	3.6535	12.2462	6.4016	6.661
	6.948	8.2829	6.5829		11.7088	7.3998	5.6748	2.0636	6.8597	5.6094	2.3599	3.6609	11.9565	3.4047	7.1337
	10.7816	11.135	3.9996		7.0941	13.6308	11.2784		8.4657	7.9429	2.3679	3.6626	7.2982	4.5744	6.6201
	6.1605	6.299	4.2512		14.2595	7.2245	11.0223		4.1474	3.8105	2.3694	3.6669	13.8704	6.4602	6.1045
	7.2331	13.2045	5.1731		1.4498	2.6866	11.3333		11.2709	5.0462	2.3737	3.6673	4.571	5.9299	4.8059
	7.1485	14.5623	11.4632		5.633	9.1191	2.8515		3.3877	2.6974	2.3828	3.6705	5.6334	5.6596	6.0616
	6.2347	11.297	3.1849		8.8914	9.9595	5.1545		5.3498	10.5223	2.3889	3.6711	4.8439	5.7258	4.5831
	11.2402	11.5918	3.9544		2.9907	18.0747	1.6648		9.776	13.5057	2.3932	3.6744	4.1617	2.9779	4.4547
	6.308	3.8792	6.6592		6.2041	12.3612	5.777		6.4063	1.7058	2.3957	3.6788	4.3593	6.4239	9.9615
	4.42	15.7362	10.3738		4.7331	12.144	1.4979		6.1649	7.6777	2.3985	3.6811	4.8375	7.3245	5.3504
	15.1701	5.7682	8.8307		13.0586	9.7552	6.8147		5.0896	10.1816	2.3995	3.6895	12.0061	4.8034	4.0184
	7.783	12.5238	1.7239		5.7398	12.8601	1.7696		7.052	5.7898	2.4023	3.697	5.3683	3.9929	1.936
	7.238	7.1911	6.6387		11.5192	15.6653	5.7624		10.3988	7.1063	2.4035	3.7002	9.0594	2.1581	3.6205
	10.8498	5.4306	5.1709		11.9884	2.8858	1.012		10.6301	10.1427	2.4042	3.7086	10.755	7.5707	4.7277
	4.8779	7.0848	7.0575		7.0609	8.6665	7.0249		7.0382	8.7335	2.4042	3.7138	10.9376	10.1253	11.4506
	9.1822	18.9208	4.1514		9.3182	14.055	1.3308		1.9763	9.2437	2.4113	3.719	4.4454	2.9942	12.1597
	7.1914	11.7445	11.0213		7.5485	1.2557	10.0547		2.13	9.7717	2.4171	3.7262	8.2136	6.0078	5.1125
	10.1574	4.912	5.9102		6.7004	10.8628	3.7156		5.428	5.0292	2.4251	3.7387	9.1486	3.7113	4.2594
	7.8396	7.0384	11.4261		17.2846	14.5995	4.6665		4.3104	17.1324	2.4267	3.7423	13.6278	0.8466	5.9022
	7.7547	7.4685	7.6438		14.1966	14.5257	7.8417		7.4356	10.9912	2.4365	3.7463	13.1106	6.0893	11.971
	8.1226	6.9666	3.9561		13.0004	15.2164	2.2698		7.6415	2.7311	2.4365	3.7465	5.0073	2.1642	5.2271
	4.8291	7.8046	7.1736		12.0237	4.9182	4.3665		11.0985	8.7063	2.4388	3.7482	7.2291	2.4981	8.2816
	10.8856	11.0692	2.0883		4.3791	10.84	5.7798		6.3383	7.105	2.441	3.7547	7.9193	7.15	6.4997
	8.8544	10.6888	7.846		10.9145	2.3357	3.2069		11.2952	4.8527	2.4421	3.7574	5.4154	6.2762	3.2845
	12.273	8.226	5.8495		15.2997	10.717	8.2796		3.4844	9.6041	2.4432	3.7593	17.621	4.7356	5.6093
	5.2109	2.4279	4.6607		1.1345	12.1031	2.4743		4.2591	6.0676	2.4646	3.7628	15.3186	7.7536	8.4089
	7.266	9.211	8.9722		16.2925	5.8047	5.5784		3.375	13.5592	2.4659	3.7655	1.1355	4.1751	4.8047
	7.1827	1.3729	9.0061		6.0919	0.6528	5.3927		10.1031	8.94	2.4685	3.7664	4.8044	5.0871	6.0868
	6.2211	12.4385	5.1635		0.6948	9.3884	7.4312		7.8507	15.1779	2.4843	3.7686	12.9443	11.9043	1.6579
	11.1938	5.0488	5.2151		2.9881	9.7871	3.2647		9.4973	6.2563	2.4877	3.78	7.7869	9.007	4.2629
	6.4813	1.1942			12.257	11.956	3.6823		13.3532	19.8731	2.4904	3.7814	9.5457	5.0546	10.2495
	3.9195	7.7871			9.8882	19.8342	4.5233		3.5198	4.9575	2.496	3.786	14.2833	7.4626	0.9027
	6.7846	11.3974			6.6492	1.542	2.7927		6.5697	13.0904	2.5015	3.7968	14.7962	5.3115	7.3111
	11.9415	9.9058			8.3904	11.1609	0.5712		2.2802	5.7641	2.5034	3.8059	6.0657	3.117	6.4501
	5.7565	1.7762			1.2791	16.1223	4.9543		6.8134	18.2343	2.5067	3.8148	2.8948	5.8477	5.7742
	3.309	5.8979			3.8869	14.1425	8.26		3.3005	1.1944	2.5081	3.8238	14.4217	2.8413	11.944
	6.3892	10.2386			4.6391	15.2937	11.5265		2.7359	11.7361	2.5124	3.8272	13.9267	8.2851	7.0689
	6.0322	6.2964			6.6866	3.4817	4.3663		6.0007	3.9657	2.5133	3.8287	10.4161	6.9264	9.7788
	11.439	1.9328			8.0075	11.2609	1.4976		4.6574	13.2541	2.5137	3.8399	14.0822	6.0817	3.0643
	4.1765	8.0965			1.0765	8.7676	1.4095		16.0322	8.0097	2.5159	3.8439	14.0341	2.8331	7.3802
	10.3082	10.2085			9.8076	10.3833	3.5965		4.6146	6.5681	2.5289	3.8528	11.0401	2.8492	7.7846
	4.2559	8.4075			9.8947	8.2296	6.051		3.6854	5.7769	2.5296	3.8558	9.9044	7.4335	7.0209
	7.4524	8.759			4.0964	10.3021	1.8763		5.3442	12.6721	2.5367	3.8652	9.9813	5.6872	14.2399
	9.8129	2.268			19.5445	6.1349	3.9493		4.6996	2.3612	2.5435	3.8659	14.019	7.1585	10.1075
	11.9682	6.817			6.178	11.252	5.5051		5.6155	12.7301	2.5453	3.8693	1.5982	2.8792	7.3111
	11.6768	9.1616			3.7712	8.5194	7.3296		6.3174	9.2144	2.5684	3.8727	6.2473	0.7916	4.9449
	7.3878	5.4776			15.2986	2.1072	2.5927		4.5214	5.8402	2.5702	3.8744	2.8376	1.8062	3.5006
	10.2359	4.2782			12.2266	4.6096	3.841		10.5031	11.7171	2.5797	3.876	7.9462	3.4859	9.3543
	9.4031	1.2354			7.4584	12.6248	4.8492		12.3523	8.6051	2.5861	3.8769	14.9053	5.3461	12.7621
	6.3512	3.9066			10.0184	6.0344	10.6474		7.5321	6.9197	2.5921	3.8804	3.8233	5.4636	9.695
	4.3321	5.7007			13.9174	4.9043	4.1998		9.6542	8.5578	2.5992	3.8842	3.0192	6.3764	7.3201
	3.7556	9.9329			10.0281	5.2934	6.3242		0.9347	5.0852	2.6009	3.886	10.3134	2.8258	3.2523
	1.9686	11.9512			3.6134	16.9598	7.5831		4.5726	8.7242	2.6081	3.8882	11.4766	5.412	4.1307
	1.2339	10.8025			12.7295	2.253	6.1574		3.5592	10.9874	2.6102	3.9034	15.4411	3.588	9.1599
	9.0355	4.1691			7.9752	12.7828	2.0347		9.8669	20.971	2.6158	3.9062	1.1763	5.322	11.0089
	1.0403	7.1624			11.9958	5.9489	4.9997		8.166	17.9603	2.616	3.9197	6.6638	4.1116	14.7825
	6.8021	9.3593			5.8591	12.984	7.3434		7.9173	10.7196	2.6173	3.9424	17.3305	1.9748	5.9074
	6.6743	4.3349			5.97	19.6612	2.6492		7.0686	10.6516	2.6194	3.9504	5.1319	4.23	3.3111
	0.8144	5.0925			3.7275	11.1045	4.1318		15.4892	7.0686	2.6322	3.952	6.7547	7.5035	2.5602
	6.975	7.6913			10.172	12.7198	11.2405		14.2278	1.4445	2.6326	3.9547	6.5352	0.9842	6.338
	14.7932	11.6954			10.0067	9.1966	6.175		8.5958	5.9129	2.6326	3.9563	12.9645	6.9809	5.7038
	10.8487	9.7271			11.0292	10.332	5.1498		7.3842	7.3157	2.6351	3.9648	7.7438	9.1812	10.5187
	7.5958	2.3267			9.5568	4.736	8.6419		10.595	9.4001	2.6377	3.9743	9.8507	5.5634	2.7703
	13.6599	0.6842			8.9168	14.4928	10.6274		2.2881	7.2621	2.6378	3.9812	12.0053	7.9144	6.1341
	2.5317	10.9157			5.2442	5.2831	6.2161		11.0004	11.1885	2.6464	3.991	10.1695	9.9721	3.4372
	5.2033	6.5316			3.6904	12.4279	1.0938		13.5057	6.0929	2.6482	3.9953	3.5248	2.509	4.6999
	2.8389	1.3839			11.9174	1.0551	10.6282		14.1825	5.7201	2.6496	4.0033	11.8856	6.7104	2.2253
	4.0178	4.0375			7.4271	7.8922	3.6757		4.6963	6.1296	2.6516	4.0048	3.1638	6.2212	5.0196
	5.6303	10.3995			4.5374	0.7626	1.0597		11.0924	8.5548	2.6541	4.0112	6.1695	4.1766	6.6825
	5.5286	7.1557			6.5997	4.132	1.0248		3.3226	7.0177	2.6542	4.0133	9.7413	1.4038	12.0305
	3.89	4.1828			11.7806	16.1955	4.6858		16.5928	3.9035	2.6647	4.0206	5.5818	8.866	11.6558
	10.984	3.89			3.1356	12.2489	0.9059		16.297	14.2501	2.6677	4.0208	7.6622	7.9586	10.6109
	3.0061	12.447			2.9592	9.053	2.5172		1.9442	6.7633	2.6683	4.0359	1.6664	11.3814	8.021
	4.0379	4.3515			9.8349	9.3437	2.3083		4.3436	1.6184	2.6737	4.0434	13.0085	8.596	11.3538
	9.996	4.439			2.2356	2.8985	2.1195		11.1677	7.5408	2.681	4.0486	3.5408	8.4565	4.0828
	7.7995	3.2045			2.6443	4.4134	5.8927		14.3422	6.4404	2.6824	4.0495	6.8159	11.1344	2.3155
	9.5006	1.8437			1.7779	11.2422	9.5696		11.7731	1.9262	2.6838	4.0516	11.3908	4.3038	4.9253
	11.142	11.6515			8.6378	8.2387	3.8377		6.3291	2.213	2.6842	4.0524	11.2702	1.9199	3.6293
	13.1976	15.4698			11.0609	8.6021	9.6867		3.7217	9.7481	2.6945	4.0541	15.4569	1.8907	7.6725
	3.0384	14.9457			5.5909	10.6818	6.1177		10.6086	13.1746	2.707	4.0558	10.0789	6.936	8.5438
	9.1304	11.3931			1.6027	13.7912	6.6199		4.8936	10.0355	2.7075	4.059	5.8227	2.6694	8.5722
	9.1358	8.4236			17.8096	11.2986	7.1583		6.0472	12.7793	2.7095	4.0633	5.9187	7.4539	7.5065
	3.014	14.1867			15.4533	9.5002	0.8597		12.4917	7.1582	2.7135	4.0721	7.0386	3.4549	11.8031
	7.17	13.9894			23.2368	8.9906	11.1943		5.0108	12.3228	2.7141	4.0887	14.564	8.3454	5.6069
	9.5685	8.8684			11.3653	16.3703	1.4963		7.2916	5.3295	2.7175	4.0914	11.4686	5.8623	5.7978
	7.2883	7.755			2.8831	11.8423	8.4807		7.7742	13.6406	2.7189	4.0984	8.9464	1.6081	8.2697
	7.4977	9.3479			3.1747	5.5413	2.8144		3.1452	8.6361	2.7231	4.1073	9.642	7.6789	8.3879
	9.8685	4.2561			20.6546	9.2003	2.2615		3.1036	7.4176	2.7286	4.11	5.4144	6.2585	4.6955
	12.0176	10.8348			15.2947	3.2806	3.3725		4.0266	4.5155	2.7315	4.1108	13.2117	6.4577	3.0634
	11.7304	12.4749			7.7169	7.1111	9.5662		5.4849	15.1138	2.7349	4.1123	5.8859	4.229	2.8384
	4.8657	3.6039			10.7748	11.0959	12.9938		10.4775	7.4963	2.736	4.1125	8.9504	6.3602	2.8314
	4.9922	4.2825			6.3871	8.6961	7.3134		6.543	13.1278	2.7372	4.1187	14.7865	8.8085	4.0693
	5.8334	7.9336			7.7475	11.7865	5.0533		13.5444	0.7149	2.7428	4.1198	14.6152	9.915	9.7755
	6.0554	9.8537			2.9441	9.9846	12.2541		1.5811	7.8156	2.7448	4.1204	10.475	13.0796	9.6991
	6.3161	15.2592			1.9435	5.7439	0.6		3.5618	10.3427	2.7584	4.1252	10.433	5.9788	8.1766
	5.3533	1.9927			1.1067	5.7736	3.5262		13.1437	3.3025	2.7588	4.1343	8.2377	8.0849	2.3731
	11.3283	7.0593			12.1394	8.2861	0.6904		12.6217	12.0596	2.7608	4.1373	4.3563	7.9898	10.3521
	9.2553	3.107			6.8706	2.517	5.4776		8.2323	11.6186	2.7609	4.1416	4.7913	2.2099	7.1505
	7.283	13.3757			8.105	11.0189	7.0022		1.9126	2.6373	2.7656	4.1587	4.759	9.5063	4.2769
	7.4689	5.2026			7.9943	3.0084	3.3601		9.0105	8.1117	2.7672	4.1612	8.6109	3.0686	6.0676
	9.2148	3.6052			4.2361	8.859	5.0591		2.7073	4.0836	2.7721	4.1664	7.3171	8.2247	1.5216
	1.8213	11.1951			3.7814	9.4295	1.0146		1.766	7.2155	2.774	4.1671	11.8824	3.0274	2.2947
	14.336	4.9168			3.9988	9.9372	2.6211		10.1978	3.5779	2.786	4.172	5.901	8.4685	10.8671
	7.4505	5.0864			9.0867	10.2912	6.2323		5.8216	13.1446	2.7966	4.1838	8.1327	8.5394	11.9307
	8.9232	11.6658			5.2468	3.515	5.8866		11.0434	4.5178	2.8008	4.19	12.9971	7.1959	7.3474
	2.1737	11.5612			0.186	8.8466	1.8603		9.896	19.0233	2.8133	4.1972	16.2181	11.7001	7.1028
	3.901	4.7326			11.9042	9.3555	3.2406		6.0104	10.1076	2.8156	4.1973	7.5041	16.6441	12.378
	5.5217	11.0898			6.331	18.2723	1.3768		7.1502	17.6178	2.8215	4.203	3.6016	3.4083	6.6472
	7.5859	3.7663			3.3561	10.494	9.2382		9.6841	14.2349	2.8218	4.2097	13.6534	2.9094	14.6196
	10.2037	12.0215			6.7184	14.3319	5.1952		11.3642	2.564	2.8448	4.2202	4.9875	2.4221	15.6036
	11.301	11.2583			17.7474	4.6383	10.9263		12.8797	10.976	2.8529	4.2244	11.0751	7.8798	7.3104
	7.9049	9.9182			7.9845	8.286	4.288		5.321	11.0013	2.8544	4.226	10.1373	3.3224	9.2594
	12.0126	5.896			8.2772	13.1573	3.3604		3.3749	7.3182	2.8546	4.2286	7.0377	9.6454	7.2744
	13.107	5.3435			10.0844	6.1748	8.5072		5.9772	6.2089	2.8558	4.2349	16.3842	3.6274	6.3627
	3.42	9.3365			2.6097	2.8012	4.4921		1.5817	3.8596	2.8587	4.2425	17.8293	2.2626	3.327
	6.9021	11.945			5.5675	0.9615	9.0699		0.8899	11.6941	2.8718	4.2466	6.3891	5.8809	6.3536
	4.1989	6.4226			17.4826	13.0832	9.6424		12.0272	6.5571	2.8732	4.2614	0.3591	4.2071	9.5157
	8.3203	1.9687			12.6954	4.055	1.2639		9.2218	9.7214	2.8763	4.2639	6.7036	7.5598	8.0907
	4.4902	6.7966			17.1825	13.5643	8.591		2.4781	11.8939	2.8791	4.2667	6.1793	1.4297	4.8405
	4.5195	12.0115			7.7185	14.9654	3.0779		5.7975	18.3863	2.8815	4.2745	14.3567	4.3538	1.7666
	7.3156	7.1554			9.3686	13.2639	2.9329		8.2376	15.7297	2.8823	4.2868	11.1718	2.2416	7.6155
	8.0928	12.5048			1.5034	9.8653	9.7584		1.3611	12.8662	2.8953	4.2901	10.2592	9.8473	11.2613
	2.8992	7.5275			7.6538	6.9501	11.2262		9.6522	11.2457	2.8972	4.2911	11.1181	7.3279	8.4171
	8.7094	4.0417			10.0007	11.7367	5.518		0.6237	5.6944	2.9092	4.2927	4.7697	7.942	0.897
	9.8864	5.1783			12.2818	0.9761	12.7978		1.0775	1.6448	2.9111	4.3063	9.3449	3.8101	3.6636
	2.1769	9.1594			12.3791	1.1742	12.7031		7.9786	19.8545	2.9188	4.31	11.0359	8.0273	4.4347
	11.9923	11.1991			4.797	7.2243	3.5321		10.5977	11.3435	2.9263	4.3118	13.4396	8.0663	7.947
	3.2454	10.6042			7.9596	10.7363	7.8524		11.4111	12.5369	2.9318	4.3253	12.1293	12.1534	7.4196
	7.876	9.757			4.6611	8.8965	11.1107		9.5124	20.802	2.9464	4.333	13.8287	4.5727	3.0888
	10.7896	15.173			2.895	12.1965	9.2225		8.6374	9.1822	2.9496	4.3333	5.526	4.3655	1.9862
	9.0419	12.3705			12.6661	8.1312	4.4987		8.0462	10.0325	2.9561	4.3357	15.9192	1.607	4.6761
	7.0005	6.3057			9.8439	2.7066	4.6547		6.2026	10.4824	2.9602	4.3359	15.8265	5.3182	7.3051
	7.6025	11.662			5.4686	12.5779	8.6878		10.644	10.598	2.9617	4.3391	12.827	3.3889	5.9224
	15.5539	9.5158			3.4804	13.811	4.0652		7.2665	11.1626	2.9679	4.343	8.4084	5.3875	5.1183
	13.1932	4.3058			4.9493	15.33	14.3333		2.6803	10.6869	2.971	4.3668	2.5332	2.6323	3.6273
	9.2645	4.2885			11.787	5.3934	12.7866		8.7991	12.4746	2.971	4.3671	8.4451	2.0554	2.1794
	1.9689	9.7359			18.8845	12.3491	4.8449		17.436	15.4119	2.9718	4.3673	9.4731	3.4245	7.0652
	11.3704	3.6462			7.7882	12.3893	4.7567		12.4709	11.1658	2.9739	4.3722	4.0752	7.1779	13.1136
	4.2262	6.0375			12.2177	3.5434	10.2776		7.999	9.6501	2.9765	4.3904	8.5229	11.0955	0.4549
	5.6056	9.9756			2.0809	8.1073	7.6432		6.8173	11.5376	2.987	4.3928	7.3705	7.6794	10.4806
	5.7065	4.5023			3.975	5.1094	4.6713		12.5012	11.1153	2.9878	4.3993	18.0146	8.4209	8.443
	5.6591	11.2748			5.557	7.3129	8.544		9.0591	7.4675	2.9891	4.4357	17.5099	1.7287	8.3452
	7.3578	6.7888			15.2275	3.9214	6.3877		9.1887	3.9211	2.9895	4.4464	6.972	4.9422	6.6673
	4.5901	11.7828			10.3495	5.2807	1.7708		3.3877	4.5096	2.9949	4.4585	9.1644	5.8277	11.1433
	5.5134	9.0849			9.3985	9.3637	2.0466		13.8123	16.8886	2.998	4.4634	1.6787	6.3394	2.745
	13.866	3.4977			0.9872	9.2293	3.6636		9.9158	11.1147	3.0052	4.4683	10.3494	3.5264	8.4996
	18.1567	4.2719			14.1753	7.1517	9.4858		12.1262	9.5437	3.009	4.478	7.6283	2.6631	5.4569
	11.4484	15.0712			10.9439	12.4901	4.0349		11.5945	14.3215	3.0104	4.4793	12.1111	8.0405	3.2784
	9.6344	14.2907			3.328	7.5741	8.7699		7.1678	4.1799	3.0129	4.4859	14.7826	8.9354	4.5878
	6.2125	21.8445			5.2704	1.3422	5.99		11.1987	5.2104	3.0163	4.4943	14.3022	7.9228	4.0801
	4.7787	5.8535			5.2797	18.4026	9.0598		14.6923	9.7796	3.0207	4.5009	8.6996	1.1542	6.778
	3.6369	2.1741			11.6839	8.061	7.5288		5.1112	8.6494	3.0297	4.5052	8.2178	8.2772	6.1194
	13.4116	7.4673			2.2439	13.6003	1.2161		8.4328	17.8837	3.0399	4.5101	15.6538	7.2935	11.8949
	6.2621	9.8677			6.323	8.8773	5.7356		6.3782	8.7848	3.0399	4.5216	14.7057	3.7368	11.5013
	9.8386	6.813			17.1713	7.9225	5.384		6.8484	18.1664	3.0448	4.5321	14.0695	3.9902	1.6489
	8.015	7.2641			0.9813	9.9527	6.8311		7.3785	7.787	3.0463	4.5384	9.3125	5.2171	11.5567
	8.5644	5.5787			11.9551	4.5996	0.8994		11.8183	13.0264	3.0485	4.54	7.4936	7.5257	6.1991
	7.6272	5.9999			5.1351	10.4107	1.052		8.6406	3.1731	3.0545	4.5452	7.2821	3.8984	5.4553
	4.544	8.5037			10.9277	7.4366			2.5555	5.7211	3.0577	4.5477	8.9905	2.9533	9.3956
	13.5763	2.8835			14.4057	16.1434			12.4881	1.2381	3.0668	4.5611	7.7577	4.2741	7.0759
	16.1306	5.2568			12.3801	8.4			4.7633	11.7136	3.0732	4.5761	1.5117	1.276	12.6001
	8.9841	13.2127			2.7872	8.4868			5.762	5.224	3.0749	4.5847	8.5215	7.7416	7.2469
	6.6704	13.9179			10.8946	12.8535			7.4494	15.2136	3.0792	4.5866	7.0234	6.7816	6.4907
	8.9212	7.1722			16.2531	19.5897			5.5305	7.4093	3.0803	4.5917	5.8143	1.5273	10.9687
	13.3788	7.5827			13.1525	8.0643			1.3978	6.452	3.0827	4.5925	10.6446	4.172	11.3939
	8.6877	10.7155			3.2896	7.9506			1.8517	6.7254	3.0844	4.5929	10.3097	8.3993	2.167
	7.8316	13.9248			8.5003	8.2693			11.3058	10.7253	3.0889	4.5992	6.3008	0.6668	7.5909
	13.2809	13.1331			13.6391	5.8899			1.914	6.5584	3.0941	4.6022	8.748	4.5958	5.3434
	4.2891	16.5688			14.0715	9.9687			14.8303	5.0037	3.1053	4.6038	8.0767	9.5608	8.0617
	13.3685	2.7657			13.977	17.9329			11.0827	8.2427	3.1229	4.6056	2.6386	5.4274	6.5813
	14.3511	7.1927			9.9613	4.2539			11.5716	9.0706	3.1313	4.6107	7.8135	6.6967	8.763
	12.2999	14.1205			4.4777	8.3005			8.5406	6.3435	3.1351	4.6124	3.1774	8.651	6.1473
	7.8446	1.6581			8.1306	18.0653			7.7943	9.5613	3.1368	4.6211	3.8448	11.3452	8.7013
	10.8162	4.9579			9.4472	13.976			2.5363	16.5555	3.1473	4.6231	5.4326	2.136	5.8517
	13.9849	15.902			6.174	12.4556			5.5447	9.3306	3.1563	4.6249	11.1222	11.136	6.1667
	7.5491	3.146			6.0477	1.4018			3.0881	15.9656	3.1594	4.6254	8.9733	13.119	4.3398
	6.5317	11.5559			0.7622	14.1219			7.8379	2.5887	3.1597	4.632	11.901	7.2401	7.244
	2.9406	6.6887			7.1057	12.3994			9.9041	12.5959	3.1639	4.6378	10.6811	7.7908	12.5243
	11.4633	4.2769			6.7989	0.5431			7.3856	9.5634	3.1671	4.6412	11.6348	7.5233	8.9149
	6.4315	5.6961			12.3552	17.0476			1.4276	9.3367	3.1736	4.643	1.9192	14.0866	7.1192
	12.3068	7.2822			9.0011	15.9315			15.665	12.5217	3.1766	4.6452	8.4581	7.5581	3.1778
	15.8039	7.9099			11.624	5.9048			6.5638	8.0655	3.1782	4.6599	8.3616	6.1132	5.9533
	13.9566	4.0423			12.0702	8.5075			10.4701	8.3129	3.1787	4.6662	3.3268	4.1864	8.855
	10.3524	6.9097			4.1716	7.9982			11.9865	9.7799	3.1864	4.6689	9.2174	8.7618	7.1044
	8.8482	7.3652			8.2477	14.7963			17.3936	6.34	3.1875	4.6714	6.6361	1.3771	3.4392
	5.2159	13.0666			4.315	14.8554			9.9825	10.4478	3.189	4.6716	7.5151	6.6136	4.4861
	3.1659	2.2058			0.6801	18.1023			4.7276	6.3169	3.1943	4.6738	10.0373	3.2907	7.2553
	1.6423	6.1624			1.3167	13.7729			12.9395	12.4126	3.2052	4.6747	2.243	7.0686	9.4907
	11.178	2.0665			10.2379	2.7749			12.594	19.741	3.2089	4.6802	2.6138	6.0771	12.0574
	8.7545	8.035			12.611	6.511			7.0205	14.7471	3.2102	4.692	6.557	5.2157	14.3266
	7.5065	16.4734			1.2436	4.5069			12.4028	12.0651	3.211	4.6962	2.2702	4.8158	5.6713
	5.7472	10.9439			5.9775	19.673			8.507	8.207	3.2134	4.7038	12.8998	5.1346	2.7158
	6.91	10.9654			13.8978	11.2887			10.3527	8.9384	3.2174	4.7109	12.048	5.3435	2.11
	6.8293	9.9204			9.8084	10.445			8.9226	14.7102	3.2238	4.7179	8.4158	9.4999	9.1075
	7.3543	5.1234			17.5534	13.1011			13.6946	6.8723	3.2263	4.7202	17.0905	6.4058	9.2606
	4.4438	2.4982			11.8434	12.9361			10.891	8.6715	3.2311	4.7261	5.9821	7.0817	2.5089
	10.2317	4.1908			7.8187	9.3846			7.5525	9.6836	3.2453	4.7292	9.3635	12.0267	9.173
	5.2021	15.9036			12.7153	5.9406			8.7952	10.2979	3.2463	4.7349	12.1231	9.2839	10.0739
	10.6571	9.6047			9.9897	12.4053			1.9927	9.1516	3.2511	4.7461	8.1312	12.5119	13.3781
	3.6137	10.8325			17.2479	11.2481			5.4677	7.8261	3.2546	4.7484	2.1582	4.7884	6.6082
	16.1233	3.1884			5.3762	15.1558			18.6638	13.3162	3.2593	4.7536	3.7245	8.6584	6.2969
	12.79	10.3255			4.08	9.7443			17.7953	10.6221	3.2618	4.7659	5.8765	3.952	1.6143
	3.2006	10.1328			11.6175	12.3957			4.137	10.2889	3.2635	4.7683	12.0781	8.0742	6.3669
	2.0498	6.0804			9.9436	11.2111			2.2667	6.3274	3.2641	4.779	15.4639	3.2327	9.5986
	10.7972	10.0647			9.1962	5.0281			10.0649	5.8242	3.2739	4.7805	5.0431	2.5755	10.6393
	15.9059	5.7494			3.0481	11.8629			13.3697	11.2603	3.2742	4.7809	12.552	6.4292	2.4257
	5.4941	11.4507			10.8222	14.2283			4.6912	11.3186	3.2762	4.7852	9.227	4.2328	11.9231
	7.6158	1.8855			11.0333	11.9491			10.5928	13.1062	3.2891	4.7924	9.6474	4.6184	6.5883
	11.7811	6.1049			13.7791	5.1647			4.0897	9.5708	3.3049	4.7946	5.8057	8.0863	6.2773
	11.7649	7.5075			4.1973	7.54			11.2382	6.0578	3.3112	4.8008	11.8948	6.1751	9.0679
	4.7569	2.7487			8.4077	4.6985			4.8217	12.0876	3.3119	4.812	8.5096	11.5231	2.851
	6.6039	10.5992			8.3825	6.1089			3.0183	9.2091	3.3126	4.814	4.3587	3.3695	12.7779
	9.6722	8.5995			7.6469	16.5662			6.0569	0.8341	3.3129	4.8266	10.191	6.2756	11.613
	15.0951	7.193			11.4051	6.9576			5.4027	9.2775	3.3177	4.8278	5.3146	9.2204	11.1406
	13.798	5.7977			9.6235	15.8294			6.9809	4.1944	3.319	4.8353	6.9114	11.0559	1.2876
	8.0542	4.4535			9.8833	6.6421			7.2384	12.2716	3.3198	4.8403	4.8665	11.2174	7.3942
	10.8817	4.9144			3.4121	13.5843			12.8068	10.7392	3.3266	4.8544	13.1291	1.4159	13.9177
	7.5011	3.1989			3.5231	4.9979			11.3199	10.8795	3.3326	4.8547	2.0817	8.8248	6.5341
	8.6581	13.5945			12.4289	6.6285			3.3493	15.7495	3.3359	4.8558	13.8563	10.7967	5.6156
	7.4623	9.0614			10.8454	6.1134			6.7813	16.1472	3.3371	4.8562	2.1203	6.0429	6.683
	7.1472	11.4689			13.721	11.0572			9.8886	7.9734	3.3376	4.8619	10.6499	9.1228	7.2783
	3.6928	10.8928			4.1439	11.1195			11.0143	2.9329	3.3385	4.8645	10.04	4.9114	4.2567
	8.2714	11.0345			14.9587	3.7684			7.8759	16.5788	3.3391	4.8663	6.4989	4.225	7.393
	3.9965	12.9532			5.3206	11.2675			14.9271	8.92	3.343	4.8664	6.2252	6.5011	5.7182
	4.0727	8.6626			9.9678	1.9589			1.9188	8.8681	3.3461	4.8751	6.3051	1.4612	4.72
	7.4843	4.3647			6.7438	8.1922			3.0133	11.9733	3.3488	4.8762	8.1219	3.4884	5.5818
	10.6856	11.4334			13.2698	13.3324			16.8881	2.6407	3.3499	4.8924	4.2811	9.8911	4.2037
	9.2645	12.1316			6.9791	3.3321			9.244	2.523	3.3562	4.8949	6.586	13.842	8.6471
	3.4337	7.4148			7.6009	6.5041			5.2994	12.0153	3.3575	4.9061	3.3377	5.9894	5.2909
	7.0571	14.5337			11.8031	8.6009			10.8161	8.7997	3.3683	4.9085	13.8266	4.2549	9.7336
	7.6676	11.042			4.5439	21.4385			7.686	2.126	3.3691	4.9161	12.6634	8.2845	7.0054
	7.29	11.1572			2.8738	5.113			5.5006	10.3814	3.3707	4.918	5.552	3.3002	7.2622
	16.7665	3.1138			12.9755	10.2302			16.5958	7.8718	3.3708	4.92	8.5223	10.9121	2.3883
	6.1684	14.1161			5.2626	12.6022			8.6161	1.8621	3.3711	4.9233	4.5144	10.5413	6.9363
	11.804	1.9088			7.2434	4.2696			8.0187	7.5047	3.3769	4.9239	9.4309	6.4889	8.8585
	14.8745	7.6287			7.7765	1.5955			6.1985	6.1308	3.382	4.9246	7.6921	5.1598	9.1326
	2.5671	9.1196			6.2683	5.6762			2.6011	7.4783	3.3824	4.9403	6.6055	5.1498	4.6002
	15.286	9.794			3.6177	3.3272			8.5226	5.5	3.3824	4.9427	7.8054	7.5346	2.4061
	7.341	7.55			14.9456	4.7592			5.5338	4.3811	3.3836	4.9477	15.9485	6.5786	3.9007
	5.8664	10.989			4.4987	18.0718			6.2334	0.2733	3.3883	4.9481	3.193	12.9614	4.0233
	11.3433	8.28			8.5269	6.692			7.3267	10.5669	3.3897	4.9527	6.746	8.0813	6.8895
	10.1982	7.4064			11.0485	6.8031			3.4365	17.7321	3.3911	4.9608	5.8734	13.1793	7.0128
	10.2815	9.958			12.5649	16.5165			16.5133	0.6258	3.3914	4.9635	13.0538	3.963	3.6072
	5.8071	8.0147			13.4772	14.4779			17.014	3.2773	3.3976	4.9638	11.3742	3.4541	14.0532
	2.76	10.7508			12.8421	11.3506			5.4863	7.4675	3.4002	4.9657	11.2343	12.3456	13.6263
	14.9077	6.6334			2.8821	8.6891			9.8735	1.7743	3.4042	4.9719	5.8064	7.3453	13.4612
	6.4246	13.5788			15.0064	11.4308			4.8243	8.1267	3.4058	4.9743	7.0998	12.0971	2.5595
	6.1906	9.6458			4.4047	19.8473			5.172	11.2733	3.4068	4.9769	12.5757	5.5109	5.5506
	12.4957	11.3792			0.8204	14.9278			10.0399	13.4224	3.4072	4.9799	9.888	9.4104	11.8473
	5.5234	9.2278			2.9622	14.8363			7.4632	15.6037	3.4112	4.9807	5.5847	7.4505	3.042
	7.7844	11.6512			8.6119	15.6783			4.1328	12.8219	3.4182	4.9943	9.0545	9.2994	8.3209
	4.2309	16.8031			11.7188	14.5543			9.2832	5.4655	3.4217	4.9957	3.3008	5.3884	4.5538
	6.8121	9.1332			17.1209	1.5405			10.7773	7.5944	3.4231	4.9979	5.2299	3.0344	5.7731
	11.969	2.3469			5.2578	15.67			14.088	4.8414	3.4242	5.0028	10.2051	4.8781	9.6871
	3.3412	8.743			7.1287	12.4312			7.5342	11.2395	3.4314	5.0058	8.2645	6.5516	12.603
	9.736	5.364			10.6419	12.8825			4.0123	10.2102	3.44	5.0095	3.5324	6.9009	1.8573
	9.0237	10.7335			4.7607	12.3832			18.2666	9.785	3.4437	5.0152	9.3103	4.8686	8.69
	9.3466	11.0924			10.9197	3.9549			17.7108	15.6589	3.4452	5.0199	9.0315	8.1991	1.538
	5.5736	2.4566			14.6584	16.4724			10.2564	11.8201	3.447	5.023	9.7069	10.6925	8.9535
	4.5105	9.3075			9.7339	18.1838			9.9337	9.7629	3.4495	5.039	8.9051	4.7473	7.0712
	9.1431	11.8695			4.8583	15.0942			5.0538	12.1002	3.4525	5.0425	4.8901	5.7139	12.3
	7.9908	14.6928			8.9338	20.572			8.6326	5.6111	3.4581	5.0537	3.3075	9.1851	10.776
	11.3317	12.8542			8.8446	14.9059			4.2551	2.9572	3.4628	5.0537	7.4023	5.7525	14.4264
	8.5824	12.3695			12.0294	8.6403			4.592	13.6059	3.4632	5.0546	7.7438	6.0094	17.1719
	4.0892	9.1407			15.8251	1.7457			8.162	12.0096	3.464	5.0587	2.4696	7.9429	0.596
	3.3712	7.8543			8.2099	12.9545			15.9215	6.4756	3.4657	5.0681	2.866	5.5753	11.5435
	14.2202	11.6621			11.1876	14.9581			8.8536	0.8196	3.4657	5.0736	13.1973	5.9181	8.2014
	9.8638	7.1386			17.1008	0.2787			8.8944	12.2408	3.4662	5.0737	15.3497	2.5319	5.625
	7.7554	5.7823			8.3723	10.7109			10.2679	14.9847	3.4719	5.0828	2.772	6.8736	8.2585
	8.9816	10.5931			1.9704	8.153			6.7632	22.7148	3.4753	5.083	7.3113	10.7705	12.7244
	9.9887	11.3823			6.3422	11.4767			2.0548	11.5039	3.4908	5.0841	9.0708	5.2525	9.7504
	11.0463	15.0075			8.1361	12.3346			8.8676	0.4106	3.4931	5.0967	3.6585	4.1459	5.6635
	11.3775	5.1939			13.5027	18.0146			9.3463	9.1335	3.4977	5.1035	6.3017	7.4241	7.1971
	8.5078	5.3761			16.1103	12.5914			2.8032	13.4788	3.5023	5.1075	2.4311	1.0246	5.3845
	16.3302	10.5256			6.5126	7.8213			16.8401	13.9137	3.5024	5.1158	18.5784	8.5534	7.255
	9.5408	11.5114			5.0796	13.0763			9.1053	9.85	3.5109	5.12	16.6829	14.7907	7.2796
	7.4288	5.9314			19.697	8.6848			2.2499	6.3674	3.5127	5.12	5.1002	5.4145	9.3159
	17.8628	5.1482			1.108	4.9664			3.3663	9.4855	3.5153	5.1234	10.9109	9.4937	3.1217
	8.377	5.1287			2.958	6.3524			8.3098	10.4665	3.5163	5.1244	10.6353	6.3613	8.3902
	5.2169	9.9907			1.055	0.616			12.7254	6.5607	3.5171	5.1281	9.762	13.2732	8.5046
	9.0337	2.9871			1.5192	9.907			2.1497	6.3466	3.5172	5.1309	8.984	5.142	6.152
	9.0571	16.5314			2.6264	11.7579			4.8058	1.0144	3.5259	5.1337	9.9167	7.6129	4.0579
	7.9602	4.6993			9.5667	0.443			7.3644	11.6685	3.5329	5.1405	8.4163	4.5767	12.3361
	3.2956	6.3118			4.1877	11.0543			4.9409	9.4076	3.5331	5.1432	11.5907	10.8752	8.0412
	8.2282	0.5152			11.2397	2.3279			11.5947	10.7652	3.5433	5.1487	1.4974	6.0644	17.8604
	9.5176	14.576			6.6588	7.2412			10.1526	11.6175	3.5469	5.1599	11.0545	7.1492	5.9959
	4.0291	2.6459			11.3592	12.4544			3.6132	6.7825	3.5517	5.1658	11.7438	2.2679	10.9721
	2.904	10.4036			6.877	5.9157			15.1948	6.91	3.5541	5.1672	5.8545	6.4282	11.6724
	7.2435	12.7975			12.1521	5.6739			3.9943	7.6659	3.5557	5.1682	12.574	8.0378	6.1018
	8.4575	7.4967			6.384	17.6028			2.3266	5.9607	3.5567	5.1795	8.696	6.8098	7.5105
	8.3955	11.4911			12.5379	6.8979			9.4824	4.0503	3.5582	5.1948	14.4249	3.071	12.0284
	8.5911	8.5616			10.9857	5.743			9.5193	8.3807	3.5601	5.1953	13.0385	1.8247	12.4426
	7.4328	4.8913			6.2163	6.2504			7.473	8.8578	3.5681	5.2128	10.9581	12.5344	2.4328
	6.255	8.9174			5.0766	5.2937			10.9439	15.0774	3.5709	5.215	4.6333	11.9164	6.9066
	10.1968	8.58			4.7736	15.6014			12.6032	7.4745	3.5712	5.2225	7.4972	5.0507	7.4869
	13.7327	3.2903			3.734	1.1721			13.7349	5.0795	3.5851	5.2242	6.511	8.8665	15.8415
	8.8158	14.0497			6.309	17.4768			4.5589	4.7966	3.5887	5.2257	10.9561	4.2575	4.6995
	13.0212	17.0791			9.9612	19.0743			4.4281	5.2632	3.59	5.2378	8.867	11.066	8.3158
	4.5914	9.0556			9.7188	15.2586			7.6557	6.5207	3.5915	5.2399	6.0092	10.2388	8.3805
	4.3962	5.4138			3.9893	11.968			3.6307	1.3986	3.5937	5.2402	9.2309	5.0892	13.1686
	11.7657	7.0583			15.5551	4.2585			6.424	2.8116	3.5969	5.247	5.9511	12.0367	6.012
	8.6687	4.7383			4.2046	10.7505			9.8306	2.62	3.6092	5.2726	0.371	10.7176	12.8015
	3.5031	16.3338			6.6492	4.4708			0.5897	13.709	3.611	5.2805	14.4036	5.5077	5.2098
	6.769	12.8395			10.413	15.7048			3.8635	4.5893	3.6174	5.2821	9.2608	2.8645	13.1299
	9.7653	9.6898			3.726	3.1476			14.6365	10.8174	3.632	5.2871	14.2411	6.9712	7.4724
	3.4753	10.913			6.9537	3.6148			15.9904	9.8694	3.6364	5.2914	9.1837	7.5877	1.6756
	10.4345	10.0379			4.7208	3.9258			12.755	17.4687	3.6392	5.2958	5.7284	5.4574	4.1606
	5.7628	17.2183			8.9685	6.3114			8.7625	13.1599	3.6403	5.2968	7.2253	10.4409	7.0605
	7.8419	7.7609			7.3485	7.8278			6.9776	10.3852	3.6408	5.3002	8.9635	4.4145	15.3783
	17.817	3.494			4.7684	14.684			0.4679	2.7719	3.6558	5.3052	6.3297	6.6896	6.5009
	7.8942	13.7593			6.7669	10.4274			1.8668	9.4603	3.656	5.3054	2.0531	11.3702	8.1182
	6.6008	13.8258			9.0841	7.9185			6.8969	14.8706	3.6617	5.3076	8.4354	11.1557	8.2565
	4.0246	14.49			4.6164	10.704			8.2282	14.7304	3.6652	5.3112	15.3781	3.2225	5.698
	9.4259	8.4883			5.5395	1.3506			6.8414	12.8872	3.6677	5.3129	4.6201	13.3178	10.8375
	11.286	5.8077			4.9705	13.5592			5.2433	15.0795	3.6736	5.3156	9.9025	4.563	4.2977
	3.8767	5.3985			1.0899	13.2917			7.2707	0.6521	3.6761	5.3383	9.2333	2.5054	1.0724
	14.8273	7.365			8.6218	7.5142			5.2258	8.8193	3.6774	5.3513	13.0329	2.5196	7.7292
	13.9434	4.1936			9.5772	12.3917			8.8006	8.2568	3.6809	5.3539	13.4358	14.0438	3.4914
	6.4797	6.4963			4.2812	1.7663			10.0745	12.9754	3.6813	5.3568	6.1563	1.7434	1.3313
	2.7036	5.6517			10.3329	11.4225			4.6034	2.303	3.6844	5.3599	11.8452	7.958	8.241
	12.4935	13.7914			11.7239	3.9241			2.7588	13.4036	3.6915	5.369	8.1238	5.1425	12.0384
	10.617	12.276			15.8753	5.7985			3.6395	17.7321	3.6921	5.3695	11.5488	8.5735	13.3856
	9.6416	12.5645			2.7419	10.0071			6.5524	10.297	3.6924	5.3736	6.7733	2.0073	1.6935
	15.0251	14.4571			7.6502	13.2385			1.7968	10.6853	3.6961	5.3766	11.837	5.7528	4.3038
	8.466	11.9748			8.8367	9.0427			4.5697	21.742	3.7018	5.3821	7.3666	10.8717	6.7912
	14.5851	7.7658			16.5337	12.9555			6.7503	15.7978	3.7115	5.3846	7.0412	12.5556	1.2999
	7.8009	10.3528			8.4071	8.3182			10.5489	23.9255	3.7116	5.3862	5.9331	6.186	10.2527
	5.501	3.1626			12.5219	13.2236			8.1753	8.1671	3.7132	5.3873	1.4236	5.9358	7.9134
	12.5911	8.215			5.3481	8.9771			10.8876	2.2185	3.7133	5.391	10.5833	2.7326	3.6057
	12.3699	12.5924			10.3781	15.582			8.7984	13.1457	3.7228	5.4141	9.1531	7.646	8.9261
	11.0813	13.3931			9.6611	3.9821			7.4874	8.6632	3.7234	5.4188	6.9654	7.464	12.3749
	6.1381	6.7035			9.2025	10.1795			7.0126	6.6912	3.7299	5.4193	13.0188	3.7344	5.2991
	12.5427	11.0532			2.2351	17.5403			10.0421	1.3966	3.7324	5.4214	5.4848	10.374	12.2456
	5.2064	13.8958			3.9183	6.2756			13.299	8.3224	3.7345	5.4228	11.399	7.901	9.4477
	10.5444	7.7283			5.5199	6.5609			6.0364	8.8318	3.7427	5.4254	10.6932	6.2906	7.0527
	10.3318	1.865			8.7323	18.1226			2.5808	2.3284	3.7433	5.434	8.3998	6.1271	3.1147
	5.9102	12.7221			9.9262	9.725			9.307	13.6561	3.7481	5.445	5.1361	4.0368	6.9827
	4.7108	8.8237			10.3415	6.5087			6.7768	12.3717	3.7487	5.456	8.1651	4.3083	7.6987
	10.7449	19.6546			4.2207	8.8746			5.1054	10.0667	3.7532	5.4594	2.3281	8.166	6.7728
	2.5758	19.4727			9.1638	3.1534			4.7875	7.9878	3.7541	5.466	8.7346	2.9579	7.4821
	13.0002	13.5543			10.8424	8.6872			10.2782	6.9313	3.7591	5.4776	8.7471	4.8352	4.0617
	4.9079	12.8386			2.618	5.5261			9.4993	14.1122	3.7645	5.4796	7.3033	13.9049	5.6722
	4.1166	5.5019			15.536	8.0247			9.0265	18.1889	3.7679	5.4886	3.7671	6.7289	7.3626
	3.9705	14.943			4.2644	9.5392			10.4552	8.7752	3.7706	5.4905	7.6205	5.7941	2.9392
	3.366	14.5995			4.2357	7.8494			10.6365	9.3724	3.7761	5.4965	2.1467	5.0974	13.0143
	14.9445	11.113			10.949	9.7545			5.511	10.2573	3.7822	5.4965	0.915	5.0801	7.8883
	6.9626	5.1731			5.1667	5.7744			4.1216	0.6174	3.7869	5.4979	10.8372	5.9934	12.5924
	4.0611	6.7718			14.5136	0.2045			4.7517	12.2601	3.7983	5.4986	5.0546	6.9115	11.2061
	5.3406	13.7101			12.6128	5.3797			3.9117	9.5632	3.7983	5.5018	5.414	5.9452	2.8797
	4.8969	17.9565			11.0982	13.1506			5.1656	7.8483	3.8062	5.5032	14.7652	4.7505	3.2882
	1.0852	18.2854			6.9683	13.0957			11.4338	6.1466	3.8069	5.5067	5.594	3.1883	6.0458
	10.3769	3.6263			8.6378	5.4046			0.5346	4.9785	3.8086	5.5209	1.4386	5.1925	5.1504
	13.2424	18.8619			9.7416	12.6348			1.1469	2.9631	3.8132	5.5271	1.9063	3.3172	5.2415
	9.3258	9.9947			7.9225	12.443			5.3253	14.2599	3.8208	5.5298	10.3496	4.9398	9.2722
	6.9753	15.4993			12.6668	13.4548			9.3651	6.1845	3.8219	5.5334	12.0809	11.487	6.5742
	13.3546	4.7987			13.503	11.6297			3.7104	5.6671	3.8304	5.5402	10.5796	12.2786	10.4567
	15.0527	1.8274			2.7896	6.6931			3.9462	8.2081	3.8304	5.5436	4.208	3.6278	4.8268
	12.2239	10.8479			7.3806	6.2048			8.1786	4.1276	3.8346	5.546	11.6903	7.2036	12.0632
	7.2438	3.9612			10.0902	2.5977			3.9228	6.2235	3.837	5.5501	7.2692	2.3768	7.7318
	3.1987	11.2501			3.7705	13.3448			6.6819	9.4361	3.8412	5.5536	3.128	12.0677	4.2514
	5.9251	7.6472			10.004	14.475			5.7169	11.254	3.8419	5.5652	11.6644	4.9389	9.3727
	12.5019	7.037			3.905	14.8252			2.7995	5.4325	3.842	5.5678	4.9753	7.8221	9.5605
	3.7813	13.9116			3.2698	5.9153			14.3008	8.8132	3.8496	5.5703	4.7786	7.3943	4.0519
	9.3201	6.2102			8.4673	6.0989			8.9931	13.2786	3.8546	5.5707	0.7688	1.8731	14.0892
	6.2361	5.8821			3.7945	4.7408			13.9585	3.0573	3.8554	5.5716	4.7665	0.8824	8.7139
	7.975	5.1063			3.3887	1.6555			5.4403	1.3334	3.8565	5.5749	7.7704	4.3208	8.8366
	7.0488	14.307			15.8761	8.6228			9.3103	6.4172	3.8617	5.5779	2.2597	6.0988	6.7469
	3.9721	14.804			4.5051	2.808			10.7214	4.1006	3.87	5.5801	3.0654	6.8437	1.2081
	2.7345	6.3282			3.2836	6.4452			10.8594	1.9894	3.8701	5.5884	5.7034	4.0792	2.282
	2.5743	10.286			11.8036	14.0502			5.1236	11.0654	3.8706	5.5911	5.5287	3.7759	11.8029
	9.7928	5.7598			4.7425	3.2784			3.3075	11.2125	3.8852	5.5996	11.7452	5.485	12.5636
	15.1271	6.5943			2.9121	7.2382			15.0138	3.3052	3.8921	5.6008	2.7816	9.0217	10.3789
	3.9497	16.0985			5.8723	3.5756			3.3444	9.0766	3.8988	5.6038	16.9182	4.244	8.5377
	6.3437	18.7482			11.3636	5.2533			10.5668	5.4334	3.9055	5.6137	18.768	3.3107	12.1741
	4.4918	13.512			14.94	15.2377			11.3986	4.3838	3.9095	5.6201	2.7318	8.87	11.8128
	5.5443	16.4487			11.7611	6.7842			11.3504	13.2552	3.9133	5.6206	2.869	7.0739	12.4167
	16.1601	6.5479			4.283	8.7017			5.9623	4.9521	3.9167	5.6211	9.939	9.9907	6.9077
	15.1098	5.8367			6.9662	13.861			8.9746	9.2475	3.9195	5.6238	9.0808	7.2203	5.0162
	6.9613	2.3068			9.8211	3.0693			18.9951	2.1312	3.9212	5.6239	7.7429	6.9537	6.2824
	4.439	13.4669			4.5604	0.2504			8.5639	1.9657	3.9232	5.6409	12.2873	5.3395	6.6138
	9.3975	5.4384			4.5479	11.5064			5.4793	8.4341	3.9239	5.6552	3.6321	7.0673	10.4481
	8.2962	4.8816			0.7044	11.0211			9.3559	4.2286	3.9291	5.6623	15.6759	7.0145	2.4841
	3.6779	9.1489			3.1865	17.101			5.109	12.8193	3.9356	5.6751	8.1453	1.5146	6.0152
	10.8429	6.0982			4.5868	5.6832			5.2461	12.6118	3.938	5.6774	9.7001	4.7315	7.7183
	13.24	17.5491			6.9678	5.8606			4.765	11.3145	3.9397	5.6789	11.7993	8.6343	4.7095
	8.6692	2.9223			2.9863	2.0358			8.2236	7.3136	3.9448	5.6807	9.676	2.7298	6.553
	3.9913	14.3009			10.5657	8.0505			4.7445	7.9154	3.9464	5.689	4.8088	7.7911	11.8495
	13.2193	11.0586			7.4921	9.6822			11.4327	10.9697	3.9493	5.6959	10.894	9.6553	11.5501
	4.2547	12.5169			17.8955	5.8782			13.2957	0.539	3.9512	5.6985	2.9957	6.1707	5.4813
	5.5749	8.4313			19.4642	4.5698			11.2611	9.3355	3.9522	5.7023	10.3721	3.8437	3.9525
	8.7693	12.0354			4.5451	10.9265			9.7388	5.6578	3.9525	5.7045	5.8703	2.8934	9.054
	10.7556	9.0859			4.3664	14.6692			1.7555	10.7398	3.9527	5.707	11.4729	2.3894	8.625
	4.1831	5.7858			4.3066	10.8157			5.7818	3.5222	3.9563	5.712	8.9758	4.9133	13.7147
	7.0552	11.9081			4.7254	0.8845			2.499	7.7128	3.9569	5.715	5.3126	8.0714	5.9723
	7.5481	14.6175			2.3899	8.6657			3.4904	13.9703	3.9603	5.7181	11.1481	9.0008	9.923
	7.7838	14.5944			9.3209	7.4987			7.3031	14.4143	3.9661	5.7199	12.504	5.1703	10.2079
	11.0842	9.4353			6.7497	14.1518			16.4451	2.8909	3.978	5.7464	13.1438	5.5502	10.2277
	12.045	12.1618			5.1019	13.561			6.2655	5.9339	3.9793	5.7586	14.6219	3.2118	2.2988
	6.0512	6.2205			1.4921	8.3225			12.8583	16.269	4.0004	5.7624	9.2547	9.1947	11.0717
	15.1213	12.68			6.7234	0.8842			5.9206	6.6376	4.0008	5.7648	9.1467	5.0873	2.4208
	7.6174	10.1453			11.0729	17.0124			4.1909	15.2823	4.0038	5.767	5.0484	2.3476	12.6812
	7.4626	8.9082			10.6944	16.2227			2.8089	8.9611	4.0053	5.7711	5.8808	2.8845	6.1267
	5.5569	10.6436			17.7169	11.2318			8.1138	8.7968	4.0078	5.783	4.3452	8.3745	3.9807
	2.2935	1.6222			13.9216	14.7431			6.7006	11.1693	4.0133	5.784	7.5495	4.6422	7.8844
	1.873	13.6621			2.4962	17.8486			17.8605	11.6342	4.0161	5.7843	2.0991	5.2064	2.6365
	7.4197	4.7668			14.9948	12.0142			13.2441	7.0007	4.0166	5.7876	8.3944	1.2249	7.2603
	3.3061	12.1242			13.2044	6.6934			3.6428	4.7818	4.0175	5.7971	11.8203	4.0415	2.4194
	3.8835	11.0377			2.0253	5.7645			9.1196	12.4461	4.0201	5.7983	4.2361	0.8678	3.913
	7.3558	9.0705			4.7145	9.4508			14.4089	10.4465	4.0234	5.8016	10.6778	13.7085	10.7449
	6.45	10.6086			5.6658	9.8469			5.161	14.0915	4.0314	5.8045	5.1317	13.11	10.8624
	12.1539	2.888			9.1383	13.9754			9.0697	13.5821	4.0316	5.8072	8.4974	7.8401	4.2969
	8.9709	11.964			7.3576	12.9227			8.1294	7.5182	4.035	5.814	12.3614	3.7968	6.4245
	5.5339	12.1941			4.1477	11.3101			8.312	5.1927	4.0379	5.8198	6.9233	5.0267	15.5233
	8.321	12.3268			6.3355	4.2752			0.2895	8.799	4.0459	5.8412	8.4278	4.1782	9.5871
	8.297	2.1265			2.8369	7.6577			10.6799	5.2204	4.0462	5.8445	0.7337	3.9954	7.9432
	12.825	6.0963			8.8924	14.294			8.3809	0.9344	4.0468	5.8472	13.0048	8.5487	5.6595
	14.6332	4.3961			3.3814	1.2349			7.9829	1.0964	4.0484	5.8505	2.7779	5.693	3.9662
	12.4641	10.5749			6.9985	9.2764			5.3527	13.8893	4.0541	5.8538	6.8575	0.5909	7.5017
	11.0696	4.5287			8.872	12.3535			5.2664	3.8423	4.0572	5.8674	6.6516	5.0359	9.946
	13.5062	9.6491			5.5061	17.796			7.1653	3.2001	4.0609	5.8678	8.7422	8.1238	11.3828
	4.6936	12.773			4.314	13.7233			7.7783	5.345	4.0616	5.8739	13.4694	6.9519	1.5947
	3.8335	7.3716			5.688	12.9513			12.2525	5.8966	4.0622	5.8765	0.898	7.3178	4.5424
	4.8316	12.5965			8.6624	7.5507			10.7218	6.8936	4.064	5.8937	7.3833	6.7155	0.6571
	10.2434	2.5814			9.0514	9.5644			1.7195	8.9884	4.0705	5.901	8.4812	2.7749	6.3649
	11.9906	12.5061			6.8429	17.7195			4.7356	2.4436	4.0715	5.904	8.9351	3.844	14.6323
	13.919	12.568			8.5699	3.23			11.4272	3.164	4.0722	5.9044	4.911	1.9	15.3657
	6.2363	0.6189			18.4515	4.3412			13.2485	13.2589	4.0729	5.9045	3.0558	2.5218	17.9205
	10.9237	3.1651			8.1855	8.1084			11.2377	1.2079	4.0741	5.9065	3.1098	5.4571	11.5464
	11.0093	12.6885			8.1722	12.412			9.5899	12.2437	4.0774	5.9089	0.9341	10.8183	5.4865
	12.4896	8.6241			11.0107	13.6327			1.7185	4.8717	4.0795	5.9182	12.1991	3.4482	0.5219
	7.9307	9.0476			9.784	9.4829			5.8219	1.4529	4.0812	5.9216	3.2712	1.8209	8.4188
	15.1749	1.4291			4.3704	11.3957			2.4539	3.8153	4.0818	5.9232	13.3816	3.9035	7.2689
	6.3245	11.3814			15.1161	9.891			3.5244	3.5226	4.0838	5.9236	6.7483	8.1955	7.457
	2.4313	9.4461			5.9566	9.0043			7.2937	5.1498	4.0862	5.9279	9.1046	11.6894	11.7462
	10.5357	11.2394			5.1457	7.7392			14.9432	5.1612	4.087	5.9286	9.8259	4.6476	2.8823
	9.8129	14.8499			9.881	4.0661			5.1991	4.7167	4.0879	5.935	12.1401	5.6496	3.3802
	6.2232	13.9255			11.7083	19.4684			5.5176	6.9527	4.0958	5.9366	12.5258	5.5258	11.6432
	12.1353	13.9562			13.3813	12.793			9.2608	13.6466	4.1001	5.9371	15.0468	2.619	8.1447
	13.5019	8.6834			13.514	9.5928			5.0492	6.1683	4.1059	5.9457	18.0516	8.9794	8.6663
	10.2071	13.2541			12.6563	8.9723			5.2017	4.8935	4.1175	5.9465	4.0382	5.0689	4.0657
	13.0382	8.797			9.1034	2.7494			4.629	13.4322	4.1181	5.9475	13.4233	3.2215	6.3457
	5.5259	3.7801			10.0303	13.9995			8.0999	4.2068	4.1193	5.9579	6.7798	9.5573	6.8999
	11.864	9.2371			9.2345	5.2263			6.5468	6.7012	4.1203	5.9593	9.0411	4.381	7.7569
	4.3284	1.4939			7.009	15.7092			9.5066	8.0594	4.1356	5.9594	8.4004	2.511	9.6063
	8.9728	14.5164			14.6042	3.1845			10.6643	17.6585	4.1356	5.9598	10.8077	6.7327	5.0857
	2.3376	6.8985			14.6231	6.0229			4.7615	2.2976	4.1378	5.9636	5.9884	9.5273	6.496
	15.034	4.5256			0.9963	8.1497			8.5774	6.8181	4.1417	5.9665	7.3395	3.7214	5.8804
	8.2659	5.0519			5.9635	8.5469			12.5011	6.6484	4.1496	5.9728	9.5116	3.8344	3.6919
	5.7399	3.9086			10.5864	8.42			4.2844	2.886	4.15	5.974	4.2923	5.7941	10.4854
	5.4249	5.8998			14.1069	12.2024			5.1915	11.0388	4.1508	5.9754	10.4686	6.4803	7.6312
	11.0056	11.7434			2.7537	4.6477			6.8366	5.32	4.1514	5.9787	10.3079	5.0775	15.4527
	4.839	9.1393			14.0477	14.9408			12.0075	6.4819	4.1536	5.9822	8.2252	8.764	5.9096
	3.2405	13.078			1.483	6.5438			10.3567	10.4372	4.1567	5.9954	15.0898	13.4595	5.9784
	4.8282	8.5718			6.0835	2.9262			9.9315	4.1319	4.1571	6.0014	9.6747	7.0476	4.0594
	10.7028	6.7808			14.8909	9.2447			9.5465	4.2619	4.1573	6.0018	5.645	4.0378	2.944
	1.9349	3.7298			15.5677	6.8139			3.5182	13.2767	4.1617	6.003	5.0209	4.8183	3.1629
	6.4218	12.1068			7.5719	6.6428			8.6469	6.822	4.1627	6.0089	0.5957	1.638	4.0312
	9.8256	5.7658			4.4911	6.6354			5.8877	5.7416	4.1627	6.011	14.1845	6.4164	10.4135
	3.602	12.8711			15.7108	8.8011			11.3493	8.8893	4.1661	6.0141	0.4288	3.3399	9.0446
	4.9119	12.0126			11.8586	4.7113			7.9867	5.6113	4.168	6.0231	10.7375	8.0194	3.5102
	2.866	3.861			12.7926	3.0105			6.4405	0.7902	4.1703	6.0267	1.5205	2.7694	11.9559
	9.8503	6.4775			8.2143	12.9496			14.9509	4.6718	4.1704	6.032	13.8708	1.0609	6.1493
	12.5253	8.3465			0.8968	8.6123			5.165	13.2705	4.1713	6.0342	8.8159	11.7395	5.47
	7.9619	10.754			8.3578	5.5577			3.9353	10.6142	4.1724	6.0353	3.8621	3.0495	4.4165
	7.8233	5.48			1.5724	7.7626			6.3002	7.1831	4.1745	6.0364	0.5416	3.9976	1.18
	5.8117	16.2482			8.5098	16.3588			2.7578	4.9603	4.1759	6.0516	16.2411	5.5822	5.6454
	5.2158	5.1592			7.7346	7.1271			6.049	6.1759	4.1802	6.0525	5.8428	5.835	9.7652
	8.8051	10.1374			5.6779	5.4193			1.9906	5.6404	4.1803	6.0554	17.5431	3.29	2.6543
	9.7905	15.4924			17.5619	4.9908			12.2822	3.7426	4.182	6.0795	14.6102	10.657	8.1429
	9.5925	1.7848			8.5642	0.69			6.1	5.2436	4.1896	6.0935	15.6758	5.2864	12.5477
	6.9876	9.2817			11.382	0.4551			4.4253	5.5514	4.1899	6.0961	14.1059	11.3678	4.3855
	12.8903	5.8068			13.6437	12.1681			4.7102	4.3955	4.1926	6.0987	16.1999	4.7021	7.0818
	12.6917	5.1953			9.0401	17.7772			8.7877	5.8569	4.199	6.1008	6.2593	7.3282	6.8454
	12.1972	16.1003			10.2419	9.5688			2.5435	5.3664	4.1991	6.1028	15.1202	9.1449	11.6926
	9.1357	7.2166			12.5555	16.4121			6.613	7.2806	4.2046	6.1064	14.8215	3.2465	8.9797
	6.4996	6.3572			12.6418	1.6267			2.9546	2.9969	4.205	6.1099	2.1007	6.5167	9.5057
	7.4349	9.9646			9.8261	8.982			6.9185	2.6734	4.2133	6.1132	3.0669	3.1281	8.0732
	3.8211	0.7875			3.8536	9.0703			3.2822	11.5783	4.2141	6.1141	9.3726	4.4984	4.7195
	9.6548	12.1611			4.6451	1.1355			14.7561	1.3205	4.2164	6.1218	1.1974	6.0379	9.5663
	9.2665	9.529			6.5819	1.9003			15.2646	4.1315	4.2193	6.1312	5.1551	2.4497	8.6105
	5.6091	12.5797			11.1293	3.1289			13.6183	6.1482	4.2257	6.1429	8.67	11.5424	6.4574
	10.436	14.1181			13.8438	0.6053			10.6622	5.0364	4.2265	6.1479	3.7524	7.357	6.5514
	6.0269	10.6153			5.4698	1.2345			10.7648	10.8086	4.2265	6.1484	18.2174	1.4867	0.4407
	6.4394	2.6438			5.0246	6.2671			6.849	5.7493	4.2314	6.1524	1.1422	5.3752	3.7902
	9.8453	17.9407			5.7746	10.0668			7.2211	8.3652	4.2329	6.1557	10.9772	9.8708	9.0257
	10.651	10.4746			4.8076	4.522			4.3295	8.2386	4.233	6.1588	14.6314	10.5516	6.0825
	2.2399	9.5317			8.9365	2.2571			5.0116	6.0446	4.2414	6.1604	9.1999	4.1577	19.2173
	10.2106	13.9775			10.2411	18.9802			3.9863	2.9406	4.2446	6.1615	5.5541	2.8715	4.7822
	10.2333	11.9061			5.8157	2.8647			7.654	6.0097	4.2479	6.1617	8.7221	14.1316	2.8345
	9.4879	8.6138			4.186	6.8996			4.5767	3.0025	4.2534	6.1623	5.214	6.7959	6.7519
	4.5438	7.2415			10.3188	2.9426			10.3577	3.6681	4.2552	6.1714	6.7714	9.1754	10.2781
	11.9486	8.1992			5.9785	8.3618			6.486	7.1328	4.2605	6.1717	0.8901	5.6385	6.383
	13.5831	9.2627			6.5464	6.9205			10.9438	0.781	4.2609	6.1728	8.407	9.4613	4.6387
	7.8621	5.9003			7.0565	6.2725			5.597	8.2348	4.2718	6.1777	2.0038	5.0276	9.5631
	4.1997	3.5371			14.0146	15.9673			4.4208	8.133	4.2746	6.1796	1.4505	2.0906	4.4431
	8.2551	10.5068			15.7565	18.6795			5.9031	10.0707	4.2763	6.1883	10.6599	8.4787	3.5863
	8.0574	5.0085			7.8607	4.2912			5.6987	4.2178	4.2784	6.1936	3.6882	6.9399	8.1077
	2.6369	12.3669			11.7888	5.3998			4.6339	0.6502	4.2816	6.2128	8.2091	2.1742	10.2926
	3.207	4.9194			9.5236	3.5976			8.5128	7.7669	4.2819	6.2129	2.7236	12.6124	10.6867
	10.8213	4.5394			2.1454	2.3975			6.8313	3.3972	4.2835	6.2143	3.1361	4.9784	3.7888
	3.6176	21.285			13.4668	0.8745			11.8771	7.7652	4.2846	6.217	2.9514	13.8052	4.5138
	10.7745	6.8838			14.5044	7.2281			12.0226	6.8134	4.2858	6.2248	7.0114	8.0501	6.8288
	12.6314	15.3281			10.5113	23.2993			11.559	0.5339	4.286	6.2324	2.733	8.7558	9.3551
	10.3794	6.2981			2.9706	21.9557			9.5947	9.4915	4.2906	6.2326	8.8736	2.7817	0.9675
	12.0312	9.0852			18.8739	6.0831			8.5086	8.3464	4.2944	6.2333	6.0521	9.645	4.8215
	3.3387	6.025			7.6593	7.8741			5.1425	1.1528	4.295	6.237	0.5952	6.2237	2.3941
	5.332	3.4478			11.6055	7.2009			8.7044	6.2907	4.2972	6.2426	3.457	6.2223	6.2872
	9.9744	9.8977			10.2952	3.4872			11.4783	6.2504	4.2978	6.2453	6.7569	6.3058	6.9084
	4.6194	2.9505			3.9737	4.4118			11.9598	11.8877	4.3048	6.2627	6.889	2.3252	5.6
	9.7486	6.4309			11.0528	17.5469			9.7949	9.1973	4.3066	6.2724	4.7979	4.7742	4.5697
	4.8675	9.6757			11.4161	5.4709			10.766	7.6793	4.3101	6.2778	10.6437	3.2724	7.102
	3.0177	12.7915			13.2078	14.0666			4.5129	9.8275	4.3124	6.2798	13.993	9.7393	7.0242
	7.6837	3.9925			5.1145	15.1027			5.0834	10.9974	4.3126	6.2862	2.8541	13.444	9.6733
	12.1217	4.56			10.4999	4.5197			5.5852	10.0419	4.3156	6.2871	5.1057	12.3094	4.3876
	9.2385	11.0749			13.3616	6.1568			14.6131	5.3656	4.3183	6.2899	11.8794	6.6928	5.9243
	10.7438	9.8494			5.6482	5.8303			13.627	8.841	4.3207	6.3097	2.8401	6.7431	1.3735
	4.4185	16.2555			1.1054	5.2227			7.0985	4.7157	4.322	6.3173	4.0545	6.2841	5.5742
	1.7769	6.6434			7.2611	5.8578			11.2454	3.7224	4.322	6.3188	4.2324	6.063	5.3199
	10.7794	14.2498			14.4665	9.4387			5.4096	1.7246	4.3229	6.3205	9.5887	4.1872	6.0691
	8.3439	6.2617			1.1501	9.3688			6.7386	15.5508	4.3257	6.3223	10.1145	8.0314	12.6633
	7.919	2.684			6.0086	17.9866			4.5231	6.3911	4.328	6.3273	6.3239	12.8877	12.8278
	10.1747	1.4012			4.979	20.1707			2.7066	6.9149	4.3323	6.3357	2.7487	6.6328	12.1761
	5.8012	9.1708			7.5025	7.0217			4.7998	8.5713	4.3327	6.3385	10.9858	7.6444	4.309
	6.3376	5.6437			9.3484	6.6084			7.532	5.5713	4.3356	6.3448	10.719	3.9702	6.4142
	7.2803	8.1053			6.8797	4.4655			12.6567	7.335	4.3372	6.3461	14.3714	4.9692	8.5523
	8.5417	7.7434			11.3989	13.9081			2.7309	7.6445	4.3383	6.352	6.5133	0.4147	7.496
	8.2901	6.5604			12.8956	16.0472			7.9011	3.9842	4.3413	6.3522	8.328	5.9741	4.227
	5.3526	10.8703			1.0936	6.476			3.8606	0.5392	4.3442	6.3533	12.008	7.0852	3.9588
	10.5343	12.9952			1.7085	10.1123			6.865	9.779	4.3487	6.3536	9.2289	3.7133	7.5636
	9.5137	11.844			5.7754	6.7145			4.9228	4.3881	4.35	6.36	3.0388	4.8718	5.9784
	6.9478	15.2781			12.5521	8.6084			6.4233	10.5175	4.3522	6.3674	6.0147	7.4573	3.3161
	8.0642	10.6012			2.996	13.3742			4.5902	1.6327	4.3589	6.3675	6.2732	9.1246	15.9439
	1.8557	6.2335			10.3619	7.5133			5.7029	6.1359	4.3615	6.3702	4.6235	8.5237	5.6569
	5.0269	7.1815			6.5384	0.738			2.9374	8.0438	4.3674	6.3704	10.1631	4.7941	3.2198
	7.677	9.6293			8.7238	13.4846			3.8129		4.372	6.3783	2.5571	6.8998	4.3569
	9.2317	10.5626			3.9838	2.039			3.3457		4.3737	6.3822	6.1585	1.745	6.8828
	3.5923	10.4996			4.5388	12.0981			15.023		4.3742	6.3905	3.4594	1.4176	13.0649
	5.7517	5.2016			1.7803	2.5031			11.4705		4.3815	6.4005	11.713	5.7958	1.2812
	16.6106	8.0619			3.6641	6.2534			14.8627		4.3845	6.4072	2.4317	10.1554	4.9022
	11.5897	6.4415			1.487	10.0285			7.9439		4.3862	6.4077	2.7216	4.5447	9.2298
	10.2221	1.7975			4.7664	8.1962			6.8814		4.3881	6.4077	3.6665	5.0639	5.4365
	9.6964	8.5561			8.3498	0.6195			5.2954		4.3995	6.4089	10.9955	5.0267	8.6733
	7.7481	9.5202			8.9916	15.4556			4.0603		4.4033	6.4104	8.2085	7.6494	6.8951
	8.7982	11.9374			9.3792	1.2704			11.0378		4.4096	6.4186	2.8216	6.847	6.4022
	12.959	12.7764			12.9461	0.4067			0.6737		4.417	6.4212	3.1889	12.2505	9.1234
	4.4717	19.2854			9.8407	1.869			14.8425		4.4262	6.4243	3.8883	6.9326	2.4813
	8.5957	13.39			15.4935				11.2654		4.4295	6.4247	11.017	0.4889	8.9566
	15.6611	5.8827			15.6397				5.0784		4.4305	6.4256	3.5012	1.7707	8.245
	7.2964	11.8854			5.8014				11.6523		4.4308	6.4381	6.1416	11.8778	6.7136
	4.1305	9.6072			3.8717				6.7554		4.4323	6.4419	11.3567	5.1809	8.2682
	8.404	17.0142			7.287				6.9874		4.4366	6.4427	7.6006	4.3735	12.7293
	10.6978	2.7675			9.9367				7.1466		4.4378	6.4453	3.8819	6.9082	11.4329
	6.2795	7.0123			1.29				0.8355		4.4515	6.4497	4.8868	10.6789	10.1988
	7.254	10.2448			11.9228				10.2809		4.453	6.4516	1.256	12.1083	4.8989
	11.422	9.7564			3.1026				12.4301		4.4577	6.4586	8.1245	9.1034	8.5945
	2.8378	9.7812			5.0396				0.3631		4.4651	6.4688	5.0778	6.8401	2.7372
	3.0377	6.535			9.2668				6.8206		4.4721	6.4694	4.4379	10.3947	1.538
	3.422	4.5127			10.6648				7.4396		4.4775	6.471	10.4578	10.8238	10.3552
	13.2108	13.9027			12.9239				8.6175		4.4795	6.4738	1.0926	11.3819	11.5574
	6.4308	5.0638			2.6712				6.6938		4.48	6.4741	9.1237	4.2234	9.0487
	4.6018	5.1719			9.9712				15.0465		4.4821	6.4748	5.9965	3.8041	4.0868
	2.5529	4.6172			13.1776				11.0665		4.483	6.4783	2.6067	7.9701	5.1239
	3.6012	10.1829			14.0477				11.9636		4.4842	6.4797	4.7335	4.7352	3.7653
	12.3391	11.6164			14.4209				6.7627		4.4891	6.4807	3.6656	7.7664	0.9791
	5.724	15.7107			5.1796				10.5646		4.4965	6.4936	6.493	9.821	10.6009
	9.7521	3.6741			6.6214				9.0279		4.4984	6.5018	8.547	5.5616	4.5243
	8.8783	2.6771			16.2071				7.4275		4.5011	6.5114	7.1511	7.683	6.5317
	2.7807	12.4798			15.0156				7.448		4.5031	6.5287	3.2423	10.2813	8.6931
	6.5374	8.2331			9.7102				2.195		4.5062	6.5444	6.8108	2.5231	6.8393
	8.0193	6.7572			11.0073				11.0709		4.5084	6.5464	6.5372	5.3383	3.6872
	5.5749	3.4854			10.1845				12.0926		4.5118	6.547	15.2897	1.6885	10.7541
	4.6281	12.8949			4.5553				12.5595		4.5171	6.5505	17.8608	9.5845	7.0528
	5.5292	6.1997			2.4686				14.7679		4.5177	6.5514	11.5724	8.7699	13.0663
	9.2041	6.7625			9.7588				7.727		4.5194	6.5525	11.9679	9.7935	8.0068
	5.0962	2.9357			12.4497				11.5174		4.5214	6.5582	10.3275	3.3812	3.8123
	8.8855	3.2801			8.3887				11.7896		4.5248	6.5672	4.3065	6.5838	1.8027
	13.1107	4.8623			2.0723				11.0947		4.5258	6.5747	3.2151	6.3034	6.7424
	13.4237	11.533			1.8784				6.3378		4.5322	6.5858	11.0848	13.4	9.0726
	6.4197	9.9286			9.6912				19.1101		4.5332	6.5869	5.3721	4.9546	8.2427
	10.9836	2.0994			10.5871				13.2133		4.5351	6.5882	2.8456	3.2497	5.0636
	10.3839	12.8399			11.7191				2.8007		4.5372	6.5911	2.9282	6.4271	10.714
	11.6154	13.7953			13.7231				9.9661		4.5381	6.5924	6.4846	6.9914	8.9941
	13.6108	8.7002			13.0557				6.7125		4.5386	6.5931	8.5869	10.8786	5.6161
	7.135	5.208			12.8753				9.1328		4.5477	6.5979	2.5046	9.2788	3.4803
	9.3627	12.7176			10.4343				8.9021		4.5552	6.6017	5.5005	4.7774	11.5815
	5.6662	4.0578			5.4623				7.4233		4.5554	6.6038	10.9501	1.041	4.502
	4.3767	19.1238			2.5716				6.4213		4.5584	6.6296	10.6641	8.3565	3.6657
	6.7819	15.5648			2.434				2.3748		4.5634	6.6314	9.6332	3.7267	5.5517
	10.1231	8.0311			5.2702				12.1204		4.5734	6.6409	2.0004	5.8686	13.722
	11.0332	8.5458			4.1686				10.7051		4.5801	6.6434	2.9933	5.3891	2.1835
	9.8789	7.0813			6.6425				14.1048		4.5856	6.6471	3.8705	1.6424	9.4766
	3.0426	15.913			5.0276				15.0865		4.5874	6.6472	14.2542	10.919	2.3695
	7.2907	14.7717			7.9661				7.4366		4.5882	6.65	4.9205	11.6889	4.8043
	2.8631	11.0416			8.3761				6.9376		4.5936	6.6528	7.8142	7.5005	4.6734
	10.4314	8.9754			8.9708				6.0027		4.5963	6.6588	12.4727	10.0467	5.6446
	9.1627	14.7392			8.9983				10.6473		4.6007	6.665	8.9248	6.6935	6.0907
	11.6424	3.2983			9.4136				13.3345		4.6013	6.6672	8.1955	3.8181	3.0406
	8.5208	6.8887			10.4336				6.3796		4.6049	6.6679	5.8855	5.8862	8.9229
	4.053	9.996			8.4453				15.0418		4.6057	6.6714	11.633	10.5277	6.6838
	8.3964	2.8969			7.507				11.0998		4.6066	6.6766	8.4743	2.1519	1.0914
	13.0602	11.6186			13.6058				11.8785		4.6114	6.6801	9.3385	3.5091	7.2654
	10.53	11.6902			7.4299				6.6979		4.6118	6.6803	10.1608	3.39	5.6491
	9.866	11.0196			4.1494				10.4659		4.6131	6.6898	11.9179	2.5286	1.9093
	3.8425	10.6644			8.6509				9.0239		4.6202	6.701	8.0444	7.855	5.2124
	7.7836	11.5939			14.2002				7.4538		4.6268	6.7049	5.8694	1.5233	8.4204
	5.6924	16.502			2.311				7.4294		4.6272	6.7056	5.3962	6.3007	2.6766
	1.758	11.0917			4.8176				2.2106		4.6355	6.7117	6.4597	5.2063	2.1218
	6.9511	17.6912			1.1626				11.0841		4.6358	6.7142	10.3426	5.3623	10.2681
	8.3641	2.0713			4.9527				10.0286		4.6368	6.7228	10.3177	13.6838	4.8009
	8.7723	3.8157			4.8786				0.8273		4.6371	6.7504	6.469	0.1422	10.3408
	8.3693	13.6603			16.7415				12.3397		4.6392	6.7515	6.5473	8.2456	11.713
	6.6214	5.3074			9.615				0.3675		4.6427	6.7531	4.6996	4.3761	8.8144
	8.6211	6.0029			13.4276				6.7791		4.6443	6.7553	6.827	5.2127	1.1781
	2.3155	14.6643			12.7675				7.3945		4.6446	6.7711	5.8755	6.1073	5.3868
	6.9714	7.7247			6.0959				8.4203		4.6534	6.7731	11.6922	4.7751	7.5208
	5.6467	7.9069			5.6676				6.611		4.6557	6.7849	6.732	2.7559	9.3383
	12.9619	7.778			7.4166				6.2027		4.6561	6.7891	10.1794	2.4321	3.8701
	2.2173	15.5648			4.1538				7.896		4.6583	6.7898	9.7066	7.2765	5.1812
	16.574	11.6925			5.7637				3.1413		4.6643	6.7913	5.7431	12.7281	12.6168
	17.12	10.205			15.1662				3.4374		4.6645	6.7958	1.503	9.0936	4.3217
	6.7174	12.6348			1.3953				3.164		4.6647	6.8084	2.2765	6.6556	8.9877
	4.9144	7.159			1.8282				6.3717		4.6691	6.815	8.8754	3.0703	8.3201
	7.815	7.5447			6.7414				6.5582		4.6718	6.8163	8.9707	6.4915	6.3536
	3.5411	7.1649			0.4386				6.176		4.6725	6.8175	4.7398	7.8628	12.1784
	5.6986	6.3035			8.4834				7.0787		4.6733	6.8236	16.2857	10.0448	6.1418
	6.6697	14.0375			7.3655				8.1872		4.6765	6.8294	3.1968	9.4995	6.7493
	9.4732	7.3042			2.1063						4.6799	6.8345	9.3561	5.0646	5.6069
	9.4464	11.8131			4.5397						4.6806	6.8515	6.1746	4.5259	7.7138
	10.4039	17.7423			6.053						4.6844	6.8544	7.7116	6.2804	9.0189
	7.6839	5.2936			11.6989						4.6964	6.8691	12.2143	11.7277	1.4889
	13.1593	10.7364			3.5606						4.6994	6.875	5.6646	7.9555	3.9741
	10.7578	13.0914			10.5564						4.7013	6.8774	7.7122	3.4181	4.7667
	12.1798	9.7552			13.686						4.7026	6.8825	8.964	15.7752	4.3278
	9.6508	15.8281			7.1517						4.7101	6.8837	4.9089	16.1301	9.1781
	8.656	12.6693			10.8897						4.7169	6.8838	12.098	7.6459	3.5652
	9.5032	9.5257			12.1526						4.7202	6.8875	1.8039	6.5127	7.5247
	3.6213	17.0501			8.9904						4.7253	6.9027	5.047	0.7114	14.607
	7.9218	9.2912			3.0857						4.7268	6.9062	10.7048	13.4584	8.6449
	9.33	12.7471			8.444						4.7295	6.9093	6.9873	10.2622	7.2267
	7.7279	1.0033			0.5772						4.7337	6.9094	1.7546	7.0628	5.1743
	4.3497	6.7841			1.0019						4.7343	6.9104	3.4493	3.8174	8.6841
	10.6721	5.962			8.8263						4.7387	6.9105	0.9806	5.621	12.7781
	16.0374	8.9728			9.5673						4.7397	6.9109	5.916	6.3091	4.642
	12.0479	8.4448			2.3858						4.7408	6.9126	2.5118	6.5708	2.4143
	14.8831	3.5706			1.0708						4.7415	6.9241	6.3237	12.1303	6.1835
	1.6077	9.2926			9.1214						4.7444	6.9272	11.8846	6.2252	7.6998
	8.3257	9.2447			7.0109						4.7509	6.9313	7.6458	5.8023	7.1225
	6.3701	1.6875			7.2661						4.7511	6.9363	5.3566	2.4609	4.1072
	10.1048	10.8502			2.372						4.756	6.9407	8.7447	9.435	15.5508
	13.9964	11.055			21.9598						4.7566	6.9427	3.8926	3.9012	3.5073
	2.9623	12.2308			13.1078						4.7589	6.9432	11.9202	7.0247	2.7277
	8.1296	5.2266			11.7042						4.7595	6.9503	3.9592	1.1407	12.5839
	9.3248	12.6903			3.2679						4.7595	6.9527	9.1112	2.9	6.4236
	12.9883	7.8117			2.5487						4.7596	6.9741	11.762	3.8331	10.6735
	8.9595	12.5199			8.0419						4.7664	6.9815	5.5893	8.8162	16.6564
	4.8171	7.0253			5.0729						4.768	6.9835	4.8745	3.1749	11.6438
	3.1867	16.4051			4.6106						4.7739	6.986	13.7145	2.1214	4.7564
	2.784	18.612			8.0623						4.7749	6.9861	8.7141	8.4148	10.6548
	10.4478	16.2918			4.1336						4.7795	6.9885	10.6478	5.9072	5.5251
	4.1151	14.6252			2.5002						4.7835	6.9976	2.7941	5.1638	8.7403
	6.0535	11.9678			12.2404						4.7883	6.999	6.7937	6.6153	2.0346
	4.9336	3.7207			6.6492						4.7928	7.0048	7.7003	1.8085	4.4832
	5.5113	15.7271			9.1057						4.795	7.0078	7.6217	7.3722	12.0725
	6.9928	10.003			7.4275						4.7982	7.0129	8.8071	4.6919	13.4792
	4.8435	10.0321			10.5805						4.7988	7.0168	14.2919	4.4937	10.0365
	8.7368	9.6677			11.1944						4.8024	7.0209	4.6601	5.5866	9.9277
	4.743	5.9159			2.6255						4.8038	7.0276	10.6648	0.7327	1.0171
	8.7901	9.2587			3.5739						4.8061	7.0323	3.9958	4.4533	10.7931
	8.4862	10.754			11.2091						4.8087	7.0334	7.0026	1.3498	4.2152
	11.8979	5.9797			11.3415						4.8098	7.0341	10.779	5.9251	15.8651
	6.9621	14.6753			5.6495						4.8107	7.0422	9.4038	11.7761	7.0019
	5.047	11.5148			1.2288						4.8139	7.0493	4.0315	4.1977	4.4171
	5.8106	12.0767			14.5804						4.817	7.0595	3.8547	5.101	5.2463
	5.4566	9.2184			3.6354						4.8171	7.0615	9.2694	11.1026	9.1764
	6.6216	16.8567			5.0855						4.8279	7.0629	5.3262	4.8483	17.759
	2.1742	9.89			11.1543						4.83	7.0633	11.1824	5.1473	22.8873
	6.5466	20.8002			8.2407						4.8308	7.0681	4.6472	8.168	8.6216
	10.0756	17.9802			5.9856						4.8317	7.0723	7.4147	2.1322	2.132
	9.087	10.6026			1.8155						4.8359	7.0822	4.5226	8.7992	5.9436
	7.7443	9.1935			3.7107						4.8361	7.0853	5.3718	9.503	8.2219
	6.4137	1.0856			7.9951						4.8364	7.0865	10.5056	7.8766	2.4076
	10.4455	7.0579			5.6207						4.8399	7.0886	13.0672	0.9978	13.1986
	4.8997	13.4351			5.346						4.8439	7.1116		11.445	4.1405
	6.4855	5.2776			4.1976						4.8546	7.1119		6.2767	5.5636
	5.0217	10.8177			6.3371						4.8613	7.1187		8.1613	7.3623
	5.8929	11.367			6.979						4.8685	7.1205		5.9714	2.4069
	1.9895	10.0891			11.9167						4.8699	7.1246		11.3088	3.6687
	11.0418	19.0609			13.2692						4.8699	7.1294		5.8711	10.0933
	2.2413	4.7262			7.1015						4.8733	7.1321		4.0822	5.3628
	7.2142	13.7515			6.8519						4.8738	7.1356		2.8076	7.1319
	11.4624	6.066			5.3461						4.8749	7.1395		10.9345	9.7479
	2.1828	10.4342			6.3084						4.877	7.141		9.6607	7.4295
	4.5295	14.9134			4.8626						4.8774	7.1507		9.5944	9.5427
	10.5782	2.233			9.8302						4.8811	7.1654		4.0361	2.3966
	10.0753	4.4033			1.157						4.8828	7.1683		4.8593	4.2209
	1.4299	10.3613			8.7266						4.883	7.176		11.1175	3.1291
	6.05	8.6732			13.3526						4.8865	7.1967		3.7548	2.1121
	7.2907	9.1403			5.5168						4.8876	7.2017		13.8966	1.5389
	8.092	1.6602			6.8156						4.8927	7.2073		14.5705	11.0927
	0.7866	7.6903			2.4138						4.9011	7.2096		12.9237	1.7574
	14.2143	4.0019			2.7304						4.9022	7.2191		4.0178	12.7103
	11.7969	9.3179			12.8813						4.9026	7.2199		6.536	7.7783
	9.898	14.309			12.4746						4.9029	7.2255		7.2911	6.4483
	3.0436	16.995			9.8226						4.905	7.2277		4.6872	4.9516
	7.4114	8.9082			9.2304						4.9134	7.2311		11.6104	6.994
	7.932	12.6388			7.1625						4.9199	7.24		1.0362	5.0274
	8.6919	12.1251			8.9299						4.9201	7.2426		5.8419	6.8998
	2.3231	1.9242			5.0443						4.9213	7.2524		6.3422	5.1685
	4.4048	9.1181			5.7774						4.9264	7.2536		3.9129	9.1788
	11.5936	9.4588			6.178						4.9268	7.2788		1.8883	9.1195
	5.3101	8.2474			11.2566						4.937	7.2789		5.3007	0.426
	6.1388	5.7419			3.1075						4.937	7.28		7.1027	5.449
	10.4131	9.0997			5.1947						4.9438	7.2846		6.3259	2.7214
	2.8454	11.8007			8.6919						4.9445	7.2854		4.0111	3.6945
	10.5252	6.1545			14.6108						4.9446	7.286		6.9134	2.4246
	11.0678	6.6943			3.7807						4.9503	7.2915		8.767	10.5337
	12.073	8.9062			7.7467						4.9529	7.2923		7.1239	8.4166
	4.0857	4.3535			7.8928						4.9599	7.3006		3.4845	8.2432
	10.9937	3.9429			9.7053						4.9617	7.3014		11.1214	15.5327
	3.3852	12.5214			4.5292						4.9663	7.3058		12.805	8.2795
	6.367	10.2151			9.1777						4.9818	7.3064		6.1251	4.2651
	5.6305	5.167			7.5744						4.9857	7.3095		9.4737	3.3762
	5.0259	3.0014			2.2799						4.9861	7.3219			5.0288
	6.9642	5.4812			2.2173						4.9922	7.3253			2.937
	9.8888	13.3725			8.2936						4.994	7.3282			11.8956
	14.5944	10.216			2.335						4.9941	7.3289			1.434
	6.4787	6.7567			17.6731						4.9944	7.3291			9.8659
	12.1868	7.1311			17.0819						4.9999	7.3322			2.6034
	2.4335	1.9621			8.7074						5.0044	7.3357			4.8422
	5.3993	8.686			7.0033						5.005	7.3359			4.3506
	1.2911	10.0479			10.8093						5.0054	7.3389			4.1443
	1.9611	13.7434			7.5838						5.0096	7.3436			2.1118
	10.1725	4.5608			5.0241						5.0112	7.3446			3.1343
	15.3416	1.914			11.503						5.0132	7.3463			0.9846
	5.6379	8.545			4.3892						5.0135	7.3468			6.8787
	6.8307	9.8157			13.0921						5.0142	7.3477			10.8304
	12.9912	8.3599			10.9083						5.015	7.3493			5.442
	3.979	11.7922			11.8647						5.0154	7.3512			7.0223
	12.1413	2.8063			1.2639						5.0182	7.3596			9.6044
	5.1133	5.5603			15.3621						5.0205	7.361			1.0357
	7.3363	7.9905			10.7567						5.0279	7.3741			10.5187
	4.4254	3.1702			11.642						5.0297	7.3776			10.2913
	4.6073	7.4402			8.0088						5.0328	7.3791			4.8543
	3.9521	8.3001			12.9501						5.0328	7.3798			3.3464
	14.1478	4.1628			12.7131						5.0363	7.3804			1.1344
	13.2194	6.4812			5.4175						5.0388	7.4088			6.444
	5.353	2.718			9.808						5.0425	7.4139			0.4775
	13.7613	8.4623			1.1378						5.0426	7.416			6.2186
	6.1373	11.7982			9.3189						5.044	7.4263			2.3527
	3.7998	1.6267			5.951						5.0442	7.4277			5.2247
	11.0363	4.9052			14.0894						5.0507	7.4314			6.7632
	13.4359	8.7531			8.009						5.0544	7.4371			6.7004
	6.0265	13.2096			12.1348						5.0552	7.4456			8.4482
	12.6321	8.5641			8.5564						5.0559	7.4536			12.8896
	13.4311	16.2			8.591						5.0563	7.4542			6.7052
	10.3389	18.6025			10.5651						5.0578	7.4567			8.1765
	8.3452	11.9626			6.2412						5.0607	7.4617			9.3287
	5.4299	1.4324			3.376						5.062	7.4696			4.1713
	10.7089	10.7825			10.1316						5.0658	7.4736			15.2998
	1.5665	9.4494			9.6322						5.0705	7.4787			8.6387
	2.4724	10.7345			3.8014						5.072	7.4935			9.3899
	9.2528	13.889			6.9958						5.0825	7.4987			1.7906
	7.9929	16.4979			8.9382						5.0827	7.4991			4.4373
	5.6939	15.3313			12.9094						5.0843	7.5132			1.2442
	4.3494	9.3503			4.4297						5.0843	7.5144			5.7289
	3.3883	11.441			10.2237						5.0909	7.5179			15.8696
	3.3874	11.1809			14.4409						5.0935	7.5202			3.6343
	5.24	2.4806			3.089						5.0951	7.5266			6.1378
	6.534	18.3424			6.8626						5.0953	7.5293			8.2853
	10.3331	11.4572			7.0852						5.0958	7.5311			7.7265
	9.9727	14.5996			14.7598						5.1016	7.5343			12.2045
	15.3865	12.0484			9.085						5.1021	7.5394			13.4806
	3.4893	7.6738			13.7234						5.1024	7.5427			5.1221
	12.2019	12.3405			5.463						5.1055	7.5521			14.6983
	12.01	19.5155			1.3149						5.1124	7.5578			13.4348
	10.7868	12.6536			4.9353						5.1205	7.5636			7.2941
	11.8825	17.4945			14.6337						5.1267	7.5666			10.7286
	15.2468	12.7381			4.4609						5.1301	7.57			6.1779
	13.7186	5.4292			3.7499						5.1324	7.572			10.1729
	11.997	3.1387			10.919						5.133	7.5732			1.8562
	14.3349	8.9082			14.175						5.1338	7.5761			3.7531
	17.2808	14.2667			14.5518						5.1372	7.5781			5.0072
	5.4366	15.1777			7.8909						5.1415	7.592			7.0898
	13.4305	17.8038			9.2255						5.1433	7.5933			8.3806
	14.61	12.0483			10.0147						5.1437	7.5938			8.1415
	9.0873	12.6879			9.9854						5.1461	7.5946			8.6246
	3.0238	16.285			13.0829						5.1491	7.5999			1.2497
	4.8907	10.7611			8.4635						5.1493	7.6011			12.4699
	6.7193	7.0273			10.0607						5.1504	7.6016			15.771
	10.3978	8.9565			11.4642						5.1506	7.6047			7.1401
	8.764				2.4448						5.1513	7.6054			1.6511
	3.6676				15.0583						5.1563	7.6059			11.4036
	8.9261				7.6635						5.1603	7.6146			10.421
	13.6203				5.8266						5.1604	7.6317			14.183
	16.131				0.8794						5.1645	7.6364			7.7442
	1.5911				10.4715						5.1664	7.6435			2.9733
	8.4999				5.7471						5.1674	7.6446			7.9199
	7.1376				7.3924						5.1724	7.6454			4.0558
	10.2698				9.4961						5.1742	7.6516			5.7048
	3.2648				7.157						5.1769	7.6593			5.3701
	7.0518				7.5093						5.1779	7.6606			16.3818
	14.3932				10.6434						5.1798	7.6611			4.987
	11.6895				6.2617						5.1806	7.679			11.8878
	5.0022				2.1986						5.1845	7.6794			16.4703
	3.823				5.0118						5.1863	7.6836			10.1144
	9.5647				8.084						5.1866	7.6842			5.0768
	14.0874				10.2168						5.187	7.6848			14.2993
	8.9388				6.9496						5.1871	7.6876			5.0356
	7.2094				5.3425						5.1898	7.689			3.2244
	8.3516				11.7379						5.191	7.6936			3.3905
	6.4048				4.2624						5.1917	7.7011			7.9889
	4.0978				3.4756						5.1919	7.7101			7.7256
	9.9754				2.3563						5.1934	7.7161			5.257
	11.0984				9.3643						5.1934	7.7257			7.1333
	9.5914				13.7654						5.2009	7.7305
	8.1821				12.5729						5.2019	7.7358
	2.6407				6.1431						5.2025	7.7415
	5.9095				1.4181						5.2027	7.7426
	9.4298				18.0458						5.2027	7.7486
	6.5188				14.9638						5.2032	7.7536
	11.8847				12.847						5.2047	7.7545
	14.4657				12.891						5.2104	7.761
	10.1243				10.9947						5.2337	7.762
	12.1887				1.5521						5.236	7.7639
	10.2828				16.4501						5.2456	7.7703
	11.027				12.9106						5.2457	7.7715
	5.156				8.9873						5.2466	7.777
	13.1848				6.5093						5.2476	7.7797
	6.5161				3.7361						5.2515	7.7807
	9.7198				8.3153						5.2565	7.7876
	7.1958				13.699						5.2577	7.7902
	10.2408				11.2445						5.2581	7.799
	11.9167				12.0516						5.263	7.8031
	11.6702				6.3089						5.268	7.8075
	12.5948				5.3956						5.2684	7.8123
	10.5168				3.8758						5.2738	7.8147
	6.4677				3.8241						5.2757	7.8238
	11.5346				5.9212						5.2759	7.8243
	9.0888				10.1308						5.2781	7.8354
	5.6553				7.27						5.2782	7.8358
	6.8098				8.4031						5.2811	7.8406
	9.5434				5.4583						5.2821	7.8489
	6.4055				6.3344						5.2861	7.8547
	9.0055				9.8463						5.2868	7.8557
	14.5955				9.8606						5.2883	7.8576
	5.8681				7.5649						5.29	7.8579
	7.962				8.8401						5.2917	7.8597
	6.2751				11.5675						5.2921	7.8615
	8.0927				4.8627						5.2934	7.8742
	7.362				12.318						5.2958	7.8797
	2.0061				10.3535						5.2987	7.8829
	8.0272				12.1053						5.3008	7.8892
	12.266				6.0053						5.3035	7.893
	1.6877				5.4615						5.3047	7.923
	5.8127				12.9152						5.3131	7.9288
	14.065				9.7026						5.3201	7.9389
	11.429				7.2802						5.3211	7.9402
	10.432				3.3786						5.3259	7.9419
	8.3101				11.1525						5.3351	7.9427
	10.8591				4.7177						5.3403	7.9534
	14.7314				5.9884						5.3421	7.9587
	9.1986				5.3797						5.3425	7.9647
	12.6051				8.8675						5.3438	7.9654
	6.8238				4.2811						5.3475	7.9673
	4.1471				1.3934						5.3508	7.9723
	11.4377				12.6703						5.354	7.9815
	4.7773				3.0485						5.3564	7.9825
	10.7039				0.8054						5.3589	7.9951
	2.3672				4.6001						5.3597	7.999
	1.6334				0.7648						5.3645	7.9993
	13.6066				2.6104						5.3646	8.0031
	2.901				10.4248						5.3647	8.0051
	3.7896				9.3531						5.3695	8.0209
	3.9569				12.2027						5.3701	8.0219
	7.4937				14.2116						5.373	8.022
	11.8202				4.5336						5.3742	8.0282
	8.7897				15.7605						5.3755	8.0418
	4.8079				1.2747						5.3766	8.0422
	2.5737				17.8853						5.3788	8.0512
	10.1933				11.2817						5.3805	8.0598
	8.798				4.178						5.3823	8.0618
	5.4361				10.2847						5.3858	8.063
	7.2263				9.8106						5.3919	8.0655
	3.4978				15.7801						5.3925	8.0658
	6.1705				7.2127						5.3937	8.0662
	3.7077				4.3091						5.3955	8.0823
	5.5541				3.3243						5.3968	8.0877
	10.6788				13.1094						5.399	8.0978
	8.3305				6.6306						5.4001	8.0983
	7.8623				1.777						5.4019	8.0998
	7.8605				5.8727						5.406	8.1042
	2.0849				10.6906						5.4111	8.1129
	6.6078				8.7153						5.413	8.1145
	3.6968				2.8097						5.4197	8.1162
	10.1915				15.1525						5.4327	8.1171
	7.0128				15.9877						5.434	8.1227
	4.9742				6.9529						5.4418	8.1238
	5.8706				8.0709						5.4442	8.1256
	11.358				4.0485						5.4466	8.1257
	9.3423				8.4633						5.4519	8.1312
	12.9939				13.7916						5.4523	8.136
	5.857				8.5499						5.4532	8.1393
	9.5367				7.5443						5.4535	8.1458
	1.1098				12.0797						5.4574	8.1459
	12.3237				0.921						5.4586	8.1491
	13.7317				12.5559						5.4625	8.1638
	14.1316				5.7343						5.4657	8.1643
	11.6817				11.9872						5.4659	8.1719
	3.0185				2.7148						5.4675	8.1773
	2.9035				7.2764						5.4683	8.181
	6.0122				8.7878						5.4684	8.1824
	8.2234				11.8044						5.4692	8.1885
	9.6092				11.2274						5.4739	8.1901
	8.2604				12.7252						5.4742	8.2022
	2.9731				16.8055						5.481	8.2033
	2.236				16.2266						5.4815	8.2056
	13.5591				13.1085						5.4896	8.2058
	6.0273				9.9201						5.4927	8.206
	4.8748				13.4798						5.4933	8.2067
	2.0497				13.4907						5.4943	8.2119
	7.5301				7.1106						5.4959	8.2169
	5.8794				2.7959						5.504	8.2197
	9.8066				11.3961						5.5078	8.2212
	3.4298				5.9116						5.5092	8.2249
	9.3709				1.5638						5.5121	8.2249
	5.4495				11.1785						5.5132	8.236
	11.9869				5.9119						5.5134	8.2449
	4.9692				8.0568						5.5194	8.2457
	4.3381				10.1597						5.5232	8.2554
	1.9122				11.4521						5.5275	8.2656
	5.5622				11.0692						5.5319	8.2702
	3.9244				9.1785						5.5369	8.2776
	4.5706				12.058						5.5391	8.2777
	5.6315				11.8767						5.5396	8.3068
	5.1381				14.5665						5.5406	8.307
	2.557				14.7333						5.5415	8.3116
	7.5291				0.2852						5.5436	8.3152
	5.9518				7.1556						5.545	8.3253
	8.0157				8.4811						5.5508	8.3256
	5.8738				6.1266						5.5537	8.3353
	5.5101				7.7776						5.5643	8.3387
	2.9048				1.9893						5.5656	8.341
	10.3001				7.36						5.5703	8.3473
	5.7694				10.2919						5.5745	8.3473
	11.3481				4.5169						5.5764	8.3658
	6.8443				5.8822						5.5777	8.3662
	7.8946				10.9672						5.5892	8.3682
	8.7007				8.4372						5.5932	8.3725
	13.5929				9.2587						5.5998	8.3737
	3.7038				8.9571						5.6013	8.3748
	6.0927				5.345						5.6015	8.3753
	4.666				8.215						5.6055	8.3763
	11.1875				11.0846						5.6095	8.3771
	4.7449				9.0258						5.611	8.3792
	5.6192				8.9227						5.6154	8.3881
	2.3089				8.8828						5.6162	8.3889
	2.532				2.3355						5.6173	8.3916
	8.5898				9.0406						5.6243	8.3925
	12.0749										5.6259	8.3977
	8.765										5.6263	8.4009
	3.6782										5.633	8.4164
	8.0014										5.6362	8.4227
	5.0177										5.6364	8.4411
	2.6754										5.6523	8.4426
	6.6362										5.6528	8.4428
	3.7792										5.6584	8.4451
	10.2538										5.6598	8.4501
	10.7749										5.6639	8.4611
	13.4301										5.6696	8.4622
	13.0259										5.6721	8.4631
	10.5753										5.6725	8.469
	8.9963										5.6774	8.4729
	8.2815										5.6798	8.4827
	10.5683										5.6854	8.4845
	10.1784										5.6876	8.4908
	8.603										5.6904	8.4908
	6.8944										5.6914	8.4924
	4.9636										5.6931	8.4956
	8.1486										5.6972	8.498
	6.2853										5.6972	8.5048
	11.6513										5.6981	8.5115
	10.1424										5.7055	8.5137
	11.3431										5.7093	8.5156
	13.7333										5.7171	8.5208
	5.7693										5.7267	8.5296
	2.7898										5.7287	8.5357
	10.1578										5.7305	8.5425
	1.8563										5.732	8.5537
	6.9455										5.7409	8.5565
	5.5655										5.7414	8.559
	15.5753										5.7456	8.5616
	6.4005										5.7507	8.566
	4.6268										5.7525	8.5778
	2.3206										5.7533	8.582
	4.567										5.7546	8.5899
	1.7697										5.7557	8.5929
	10.8708										5.7558	8.5959
	4.0645										5.7564	8.5979
	8.2574										5.759	8.5992
	14.2273										5.7707	8.6049
	6.3204										5.7724	8.6078
	9.8289										5.7727	8.6087
	9.8934										5.7759	8.6178
	1.4102										5.7763	8.6208
	7.0188										5.7783	8.6234
	8.0223										5.7809	8.6366
	5.5333										5.7853	8.6461
	9.3625										5.7893	8.6475
	9.2267										5.792	8.6565
	10.3125										5.7953	8.6653
	6.7135										5.7964	8.6688
	10.6264										5.7982	8.6736
	10.3267										5.7994	8.6831
	7.6329										5.7994	8.6996
	9.8808										5.8006	8.7008
	7.8911										5.8092	8.7017
	10.0402										5.8096	8.7018
	10.6616										5.8096	8.7075
	2.0146										5.814	8.715
	11.5446										5.8152	8.7177
	10.1989										5.8207	8.7234
	2.6106										5.8209	8.7237
	5.1494										5.8223	8.7258
	9.9372										5.8244	8.7387
	3.6961										5.8258	8.7428
	5.3691										5.8311	8.7469
	4.8008										5.8323	8.7543
	9.2981										5.8369	8.7581
	10.5908										5.8373	8.7659
	4.8763										5.8379	8.7668
	2.0495										5.8387	8.7673
	7.3055										5.84	8.7738
	3.2019										5.8422	8.7782
	7.1052										5.8435	8.792
	7.9698										5.8444	8.7924
	5.429										5.8465	8.8148
	10.408										5.8618	8.8239
	7.2678										5.8654	8.8256
	6.7651										5.8677	8.8307
	0.3313										5.8739	8.8361
	8.6485										5.8779	8.8383
	12.8036										5.8834	8.8403
	7.948										5.8846	8.841
	2.2078										5.8869	8.852
	2.6905										5.8878	8.8551
	8.6245										5.8879	8.8578
	3.0065										5.89	8.8661
	1.4049										5.8915	8.8723
	13.0082										5.8937	8.8877
	7.1061										5.8959	8.8894
	10.0736										5.9041	8.8951
	4.2566										5.9045	8.896
	9.4325										5.9053	8.9109
	3.2044										5.9054	8.9113
	11.144										5.9064	8.912
	3.2031										5.9081	8.9187
	10.2893										5.9088	8.9207
	11.8341										5.9109	8.9357
	10.9648										5.9113	8.938
	13.2764										5.9117	8.9425
	3.5364										5.9165	8.9445
	9.8091										5.9181	8.9474
	3.9988										5.9193	8.9501
	4.8845										5.9214	8.9538
	1.3328										5.923	8.9539
	7.1247										5.9277	8.9552
	13.4012										5.9294	8.9614
	6.4438										5.9349	8.9619
	9.4355										5.9374	8.9712
	7.305										5.9376	8.9776
	6.3499										5.9382	8.9831
	3.8846										5.9428	8.9867
	12.0383										5.9468	8.9976
	9.2805										5.9469	9.0001
	9.5931										5.9472	9.0003
	7.8998										5.9478	9.0044
	14.2716										5.9485	9.0158
	3.8314										5.9495	9.0214
	12.0861										5.9507	9.0234
	9.6414										5.9567	9.0253
	6.7839										5.957	9.0357
	5.4875										5.9571	9.0463
	5.786										5.9576	9.0465
	1.7221										5.9586	9.0501
	3.4509										5.9643	9.0525
	5.838										5.9648	9.0594
	2.8767										5.9653	9.0604
	4.3481										5.9657	9.0687
	7.7653										5.967	9.0689
	8.6519										5.9687	9.0756
	10.585										5.9732	9.0763
	3.9894										5.9757	9.0834
	10.1075										5.9805	9.0857
	5.3406										5.9815	9.0863
	7.8977										5.9896	9.0889
	6.9362										5.9898	9.0902
	14.0482										5.9909	9.091
	1.1141										5.9911	9.0915
	6.2591										5.9919	9.0927
	7.456										5.9933	9.0929
	5.2109										5.9963	9.1035
	6.278										5.997	9.1047
	7.8508										5.9998	9.1088
	3.1935										6.005	9.1094
	7.3206										6.0056	9.1117
	6.5344										6.0057	9.1156
	8.419										6.0081	9.1253
	6.5095										6.0096	9.1395
	2.7601										6.0101	9.1457
	2.5568										6.011	9.1547
	8.2811										6.0116	9.1589
	4.0098										6.0124	9.1589
	10.7063										6.0172	9.1615
	8.0464										6.0211	9.1631
	8.3156										6.0249	9.1638
	15.634										6.0273	9.1697
	4.4299										6.0318	9.1722
	1.4286										6.0354	9.1803
	12.4069										6.0364	9.1839
	7.2183										6.0378	9.1875
	14.2038										6.0408	9.1899
	3.834										6.0436	9.1946
	12.5927										6.0477	9.1947
	13.6532										6.0484	9.1963
	7.9201										6.0488	9.1984
	3.3628										6.0494	9.2041
	6.8766										6.0501	9.2047
	2.8936										6.0527	9.2051
	12.4534										6.053	9.2056
	3.3022										6.0535	9.2068
	7.0406										6.055	9.2088
	12.2092										6.0564	9.211
	5.7725										6.0569	9.2126
	6.2614										6.0583	9.2365
	5.9282										6.0595	9.2365
	7.781										6.0639	9.2439
	9.6907										6.0657	9.2451
	10.0671										6.0666	9.25
	4.7571										6.0689	9.2626
	11.7704										6.0697	9.2647
	8.7296										6.073	9.2662
	2.4196										6.0741	9.2695
	12.7094										6.0758	9.2729
	3.3925										6.0761	9.2741
	9.4931										6.0763	9.2773
	4.8244										6.0791	9.2899
	3.4858										6.0805	9.2967
	8.3782										6.0818	9.3037
	10.9177										6.0893	9.3153
	10.8177										6.0926	9.3278
	1.726										6.1065	9.3384
	6.5503										6.1152	9.3427
	7.4221										6.1166	9.3445
	7.7321										6.1195	9.3468
	8.9216										6.1236	9.36
	9.9577										6.1247	9.3632
	8.1865										6.1278	9.3781
	5.0202										6.1288	9.3917
	9.7257										6.1315	9.3962
	9.9879										6.1362	9.4042
	3.1702										6.1382	9.4064
	13.9798										6.1399	9.4097
	10.9317										6.1424	9.4188
	4.773										6.1463	9.4215
	12.9887										6.1519	9.4237
	3.0763										6.1538	9.4241
	4.0497										6.1546	9.4265
	7.9274										6.1608	9.4271
	11.3561										6.1621	9.4281
	2.3423										6.1631	9.4312
	9.0004										6.1635	9.4352
	5.9074										6.1652	9.4368
	5.5261										6.1662	9.4498
	7.6446										6.1693	9.4594
	10.0399										6.1741	9.4629
	2.6839										6.1747	9.4648
	4.6496										6.1757	9.4668
	13.8212										6.178	9.4701
	4.9336										6.1781	9.4863
	10.4475										6.1781	9.4882
	5.3051										6.1811	9.4927
	5.415										6.1997	9.4928
	9.8793										6.2131	9.5007
	10.0539										6.2344	9.5084
	5.0394										6.2371	9.5364
	7.7232										6.238	9.5397
	10.0897										6.238	9.5397
	9.9898										6.2409	9.5439
	9.6462										6.2418	9.5442
	7.3613										6.2524	9.5449
	9.6644										6.2537	9.5514
	2.9918										6.2609	9.5527
	6.5044										6.2663	9.553
	10.0564										6.2709	9.5553
	5.5302										6.2759	9.5663
	6.6393										6.2765	9.5677
	7.4953										6.2779	9.5679
	6.7388										6.2801	9.5824
	4.5902										6.2805	9.588
	13.4019										6.2859	9.5985
	10.0869										6.2935	9.6001
	12.47										6.2942	9.6043
	7.4828										6.3	9.6086
	13.381										6.3005	9.6138
	11.8583										6.3035	9.6142
	10.8201										6.3088	9.6174
	13.0634										6.3224	9.6292
	8.3251										6.3248	9.6323
	5.6133										6.3272	9.6346
	12.5274										6.3299	9.637
	3.8298										6.3311	9.6412
	12.2957										6.3342	9.6525
	5.3966										6.3358	9.6565
	7.6264										6.3371	9.6751
	3.7096										6.3409	9.6885
	2.1072										6.3455	9.6892
	6.0445										6.3596	9.6919
	7.7382										6.3606	9.6932
	9.9618										6.3635	9.6953
	3.1373										6.3756	9.7087
	3.7056										6.3786	9.7097
	4.0982										6.3804	9.7151
	3.8186										6.3829	9.7158
	6.8615										6.386	9.7228
	2.5378										6.3864	9.7245
	12.8301										6.3874	9.726
	10.1418										6.3909	9.7313
	9.1946										6.3962	9.734
	13.1909										6.3965	9.7392
	13.6938										6.4011	9.7398
	7.8312										6.4105	9.7443
	3.7097										6.4132	9.7521
	9.454										6.4179	9.7529
	5.7302										6.4217	9.7551
	11.166										6.4222	9.7576
	10.4917										6.4231	9.7697
	10.3552										6.4281	9.7734
	4.83										6.4289	9.785
	15.1091										6.4295	9.7907
	12.8874										6.4329	9.8185
	8.7424										6.4334	9.8198
	12.4639										6.4367	9.8265
	8.5216										6.4377	9.8331
	3.8363										6.4378	9.836
	3.9088										6.4379	9.8424
	8.3719										6.4399	9.85
	10.2344										6.441	9.8502
	16.1201										6.4466	9.8564
	3.6033										6.451	9.8617
	12.0606										6.4522	9.8627
	7.9758										6.4524	9.8693
	2.0335										6.4537	9.8779
	13.8241										6.4546	9.8785
	5.4518										6.456	9.899
	4.9574										6.4605	9.9011
	8.2903										6.4632	9.907
	4.0974										6.4652	9.9085
	6.7788										6.4658	9.911
	12.8733										6.4661	9.9234
	11.7858										6.4707	9.9406
	2.303										6.4716	9.9484
	4.1016										6.4764	9.9496
	9.0858										6.4861	9.9546
	4.1094										6.4896	9.9561
	13.0952										6.4931	9.9597
	13.2769										6.494	9.9619
	6.4426										6.4993	9.9627
	10.7645										6.5013	9.9628
	7.1771										6.5031	9.9635
	1.1594										6.5048	9.9642
	17.0921										6.5093	9.9677
	1.7317										6.5145	9.9787
	7.3784										6.5152	9.9791
	6.7173										6.5204	9.9874
	3.58										6.5213	9.9906
	4.0753										6.5218	9.996
	7.0605										6.5256	10.0011
	11.5831										6.5271	10.0053
	9.8829										6.5287	10.0073
	12.4416										6.5338	10.0092
	8.2908										6.5349	10.0238
	6.5299										6.5373	10.0337
	8.9663										6.5375	10.0344
	15.4187										6.5392	10.0355
	11.0404										6.5399	10.0372
	10.425										6.5454	10.0454
	9.8122										6.5456	10.0501
	7.6302										6.5489	10.0506
	7.3183										6.5495	10.058
	3.6899										6.5534	10.0601
	3.6033										6.5561	10.0602
	9.2082										6.5572	10.063
	2.2673										6.5646	10.0714
	4.9354										6.5724	10.0724
	2.4574										6.5734	10.0726
	6.4951										6.5746	10.0728
	9.5515										6.5751	10.0753
	7.7571										6.5754	10.0762
	4.6174										6.5785	10.0796
	0.9013										6.579	10.0796
	7.1007										6.5832	10.0835
	6.625										6.5839	10.1009
	5.7701										6.5892	10.1012
	6.8235										6.5914	10.1014
	12.5591										6.5916	10.1122
	4.0784										6.5916	10.1203
	11.8048										6.592	10.1355
	7.8022										6.5977	10.1451
	11.3865										6.6021	10.1538
	2.4411										6.6126	10.1566
	2.6841										6.6143	10.1605
	10.4626										6.6187	10.1655
	7.719										6.6201	10.1659
	8.5994										6.6207	10.1726
	11.0174										6.621	10.1808
	5.3829										6.6216	10.1844
	1.1178										6.6222	10.1872
	8.0923										6.6224	10.1938
	5.2387										6.6227	10.1947
	10.7487										6.6366	10.1987
	12.7827										6.6381	10.207
	12.2252										6.6392	10.215
	7.325										6.6408	10.2175
	9.0612										6.6432	10.2183
	6.2773										6.646	10.2186
	10.0071										6.6475	10.2341
	7.4569										6.6483	10.2501
	3.6925										6.6544	10.2591
	2.61										6.6579	10.2663
	8.2158										6.6666	10.282
	9.1117										6.6678	10.288
	4.9176										6.671	10.2882
	7.9459										6.6746	10.2896
	8.9887										6.6749	10.2906
	10.3957										6.6764	10.3014
	6.8367										6.6822	10.3151
	3.0262										6.6847	10.3249
	2.8371										6.6882	10.3326
	8.174										6.6916	10.3419
	3.0696										6.7047	10.354
	7.2903										6.7055	10.3586
	6.134										6.707	10.3682
	10.9636										6.7132	10.3754
	4.3607										6.7184	10.3873
	2.6495										6.7202	10.394
	4.9476										6.7264	10.3988
	6.6514										6.7275	10.4024
	10.9833										6.7283	10.406
	7.2799										6.735	10.4107
	4.5654										6.7387	10.4129
	12.2253										6.7393	10.415
	9.503										6.74	10.4295
	13.8953										6.7405	10.4446
	12.7486										6.7412	10.4468
	12.0367										6.7462	10.4487
	4.1655										6.7484	10.4539
	6.5665										6.7501	10.4574
	7.6221										6.7508	10.4585
	11.6816										6.7544	10.4595
	11.5326										6.7583	10.4688
	7.544										6.7595	10.4753
	2.6451										6.7698	10.486
	4.8187										6.7701	10.4988
	4.5527										6.7779	10.5056
	5.7088										6.7796	10.5324
	8.6239										6.7804	10.5342
	5.1888										6.7839	10.543
	2.9181										6.7892	10.5489
	10.6192										6.7909	10.5542
	4.4005										6.7909	10.5578
											6.8002	10.5726
											6.803	10.5735
											6.806	10.5756
											6.8109	10.5818
											6.8163	10.5883
											6.8252	10.6023
											6.8259	10.614
											6.8325	10.6142
											6.8333	10.6172
											6.8446	10.6259
											6.8485	10.6311
											6.8492	10.6384
											6.8497	10.6408
											6.8503	10.6419
											6.8519	10.6495
											6.8559	10.6601
											6.8589	10.6606
											6.8707	10.663
											6.8715	10.665
											6.8725	10.6655
											6.8732	10.6685
											6.8746	10.6697
											6.8778	10.6704
											6.8885	10.676
											6.8927	10.6821
											6.8962	10.6861
											6.8982	10.6927
											6.9022	10.6965
											6.9038	10.7045
											6.9051	10.7173
											6.9085	10.7186
											6.9104	10.7217
											6.9106	10.7268
											6.9175	10.7279
											6.9185	10.7297
											6.9188	10.7608
											6.9229	10.7754
											6.9249	10.7771
											6.927	10.7796
											6.9335	10.7797
											6.9346	10.7833
											6.9359	10.7845
											6.9383	10.7854
											6.9417	10.7896
											6.9428	10.797
											6.9462	10.803
											6.947	10.8146
											6.9479	10.8339
											6.948	10.8358
											6.9482	10.8385
											6.9497	10.8399
											6.9554	10.8437
											6.9593	10.8505
											6.9611	10.8541
											6.9628	10.856
											6.9635	10.8579
											6.9636	10.862
											6.9644	10.8764
											6.9648	10.8805
											6.9658	10.8812
											6.9683	10.888
											6.9696	10.8918
											6.9723	10.8951
											6.9748	10.9062
											6.9793	10.9146
											6.9829	10.925
											6.9867	10.9387
											6.9911	10.9398
											6.9921	10.9454
											6.9946	10.9468
											6.9983	10.9498
											7.0003	10.9573
											7.0005	10.9593
											7.0035	10.9873
											7.0048	10.9881
											7.013	10.9895
											7.0164	10.9948
											7.0191	11.0027
											7.0192	11.0049
											7.0196	11.0165
											7.0198	11.02
											7.0231	11.0218
											7.0241	11.0292
											7.0249	11.0338
											7.0292	11.0353
											7.0302	11.0361
											7.0348	11.0399
											7.0359	11.0456
											7.0365	11.0464
											7.0475	11.0501
											7.048	11.051
											7.0501	11.0718
											7.0515	11.0875
											7.0527	11.0898
											7.0533	11.09
											7.0541	11.0915
											7.0597	11.0996
											7.0617	11.1145
											7.0652	11.119
											7.0659	11.1205
											7.0663	11.1458
											7.07	11.1602
											7.0716	11.1616
											7.0717	11.1696
											7.0732	11.1731
											7.0749	11.175
											7.0764	11.1776
											7.0791	11.1962
											7.0793	11.2004
											7.08	11.2022
											7.0848	11.2201
											7.0871	11.2279
											7.0881	11.2314
											7.0888	11.232
											7.0939	11.2357
											7.1012	11.2406
											7.1062	11.2462
											7.1073	11.247
											7.1086	11.2533
											7.1089	11.2538
											7.1094	11.2631
											7.1094	11.274
											7.1109	11.2747
											7.1136	11.2771
											7.1166	11.2774
											7.1215	11.2793
											7.1248	11.2855
											7.1259	11.2859
											7.1297	11.2881
											7.1301	11.2891
											7.1313	11.3134
											7.1316	11.3184
											7.1357	11.3218
											7.1379	11.3224
											7.1427	11.3228
											7.1553	11.3261
											7.1557	11.3421
											7.1562	11.3477
											7.1586	11.3755
											7.159	11.3857
											7.1623	11.3936
											7.1644	11.3984
											7.1674	11.4016
											7.1674	11.4065
											7.168	11.4218
											7.1731	11.4247
											7.1757	11.4352
											7.1817	11.438
											7.1835	11.4381
											7.1852	11.4412
											7.1858	11.4471
											7.1892	11.4539
											7.1913	11.4563
											7.1977	11.4566
											7.198	11.4638
											7.2025	11.4759
											7.2034	11.4781
											7.2067	11.4795
											7.2068	11.4801
											7.2104	11.4892
											7.2133	11.4972
											7.2169	11.5004
											7.2189	11.5026
											7.2189	11.5103
											7.2243	11.5197
											7.2248	11.5262
											7.2257	11.5271
											7.2291	11.5412
											7.2333	11.5419
											7.2336	11.5427
											7.2363	11.5432
											7.2377	11.5451
											7.2379	11.5505
											7.2439	11.5524
											7.2445	11.5544
											7.2518	11.5715
											7.253	11.5773
											7.2568	11.5817
											7.2568	11.5819
											7.258	11.583
											7.2593	11.5901
											7.2619	11.5913
											7.2644	11.6008
											7.269	11.6016
											7.2737	11.6062
											7.2737	11.6144
											7.2763	11.6235
											7.2784	11.6277
											7.2785	11.6282
											7.2789	11.6371
											7.2839	11.6396
											7.2894	11.6402
											7.3058	11.658
											7.3059	11.6638
											7.3079	11.6736
											7.3166	11.6969
											7.3216	11.7343
											7.324	11.7362
											7.325	11.7364
											7.328	11.7448
											7.3291	11.7465
											7.3301	11.7481
											7.3305	11.751
											7.3342	11.7635
											7.3356	11.7699
											7.3363	11.7737
											7.3366	11.7761
											7.3374	11.7853
											7.3375	11.8039
											7.347	11.8091
											7.3499	11.813
											7.3544	11.8176
											7.3549	11.8182
											7.3552	11.8211
											7.3552	11.8236
											7.3557	11.846
											7.3565	11.8492
											7.3571	11.8568
											7.3572	11.8666
											7.3649	11.8679
											7.3715	11.8724
											7.3739	11.898
											7.377	11.9014
											7.3777	11.9113
											7.3818	11.924
											7.3818	11.9305
											7.3847	11.9363
											7.385	11.9377
											7.3914	11.947
											7.393	11.9481
											7.3975	11.9566
											7.4036	11.9671
											7.4059	11.9715
											7.4073	11.9765
											7.4079	11.983
											7.4109	11.9843
											7.413	11.99
											7.4153	11.9912
											7.4211	11.9924
											7.4217	12.0088
											7.4224	12.0147
											7.4225	12.0245
											7.4245	12.0373
											7.4283	12.0518
											7.4285	12.0628
											7.4326	12.0785
											7.4398	12.0882
											7.44	12.1
											7.4436	12.1165
											7.4462	12.1174
											7.4496	12.1194
											7.4499	12.1253
											7.4506	12.1269
											7.4517	12.1269
											7.4536	12.1333
											7.4607	12.1558
											7.4628	12.1596
											7.4641	12.163
											7.4658	12.183
											7.4686	12.1838
											7.4703	12.1874
											7.4719	12.2001
											7.4739	12.202
											7.4751	12.2121
											7.4754	12.2215
											7.477	12.222
											7.4785	12.2246
											7.4818	12.2383
											7.4822	12.2503
											7.4833	12.2506
											7.4884	12.2675
											7.4891	12.2893
											7.4899	12.3013
											7.4998	12.3097
											7.5053	12.346
											7.5096	12.3548
											7.5126	12.3617
											7.5139	12.3668
											7.5235	12.367
											7.5368	12.3674
											7.5387	12.373
											7.5395	12.3763
											7.5546	12.3853
											7.5548	12.4078
											7.5558	12.4272
											7.5564	12.4334
											7.5576	12.4388
											7.5603	12.4393
											7.5629	12.4415
[truncated: 1,655 more rows]

## Sheet: Norm. distances from centroid
Normalized distances from nuclear centroid
Chr4q35.1/Chr3q11.2 (C-)				Chr4q35.1/Chr8q24.3 (C+)				Chr4q35.1/Chr10q26.3				Chr4q35.1/FBXO32 region
Chr4q35.1		Chr3q11.2 (C-)		Chr4q35.1		Chr8q24.3 (C+)		Chr4q35.1		Chr10q26.3		Chr4q35.1			FBXO32 region
CN MB	FSHD1 MB	CN MB	FSHD1 MB	CN MB	FSHD1 MB	CN MB	FSHD1 MB	CN MB	FSHD1 MB	CN MB	FSHD1 MB	CN MB	FSHD1 MB	FSHD2 MB	CN MB	FSHD1 MB	FSHD2 MB
0.746779	0.431686	0.853851	0.236208	0.589769	0.723952	0.754831	0.468359	0.525008	0.101068	0.379037	0.77344	0.464728	0.101068	0.472184	0.0527455	0.490612	0.614586
0.547833	0.81024	0.702924	0.602869	0.802684	0.257391	0.785598	0.178468	0.561394	0.622764	0.374695	0.715119	0.572849	0.622764	0.263816	0.114323	0.841121	0.515598
0.376346	0.328893	0.540558	0.60723	0.50185	0.842439	0.41877	0.522498	0.492718	0.378743	0.676296	0.195437	0.341172	0.378743	0.595421	0.679578	0.370975	0.279409
0.111139	0.28296	0.431945	0.186541	0.52111	0.385677	0.466281	0.371106	0.806421	0.456227	0.0581311	0.43907	0.777642	0.456227	0.769238	0.595518	0.647626	0.739111
0.776489	0.388237	0.831429	0.428864	0.59163	0.64244	0.598629	0.065576	0.416926	0.793674	0.375733	0.604694	0.391593	0.793674	0.499197	0.538604	0.696712	0.68838
0.754823	0.673656	0.460766	0.680287	0.888139	0.88927	0.727317	0.61323	0.244173	0.248702	0.438734	0.746247	0.826603	0.248702	0.681043	0.346452	0.621127	0.530829
0.289461	0.312332	0.687938	0.641856	0.623883	0.652876	0.763559	0.528399	0.768284	0.30916	0.590418	0.110376	0.29358	0.30916	0.852753	0.412906	0.769145	0.782486
0.67376	0.641418	0.211818	0.648397	0.636475	0.790599	0.896272	0.717922	0.780611	0.642685	0.805971	0.653021	0.278977	0.642685	0.576157	0.499085	0.570067	0.83583
0.646057	0.381699	0.586279	0.558595	0.455909	0.298882	0.495114	0.466023	0.849772	0.809211	0.642346	0.632337	0.587895	0.809211	0.531658	0.248014	0.736061	0.565743
0.719581	0.48816	0.438012	0.348044	0.626517	0.593267	0.323469	0.631258	0.567697	0.418879	0.644677	0.77553	0.672798	0.418879	0.683596	0.510935	0.629	0.543789
0.51998	0.401049	0.622635	0.41673	0.465798	0.828552	0.285486	0.734379	0.781866	0.588724	0.381082	0.907355	0.412788	0.588724	0.542699	0.548439	0.458964	0.26836
0.596021	0.355243	0.821393	0.350842	0.279829	0.704023	0.848352	0.508919	0.382479	0.894727	0.557141	0.257337	0.235315	0.894727	0.526823	0.71085	0.147002	0.680576
0.505092	0.742334	0.851526	0.552916	0.204294	0.710538	0.845289	0.227592	0.401678	0.746463	0.815699	0.63976	0.492718	0.398687	0.851517	0.753842	0.3755	0.391837
0.444623	0.688373	0.271676	0.259867	0.466091	0.637552	0.674874	0.437641	0.464019	0.852657	0.745308	0.687474	0.806421	0.173185	0.750562	0.728059	0.741115	0.72712
0.767632	0.199497	0.647021	0.453535	0.355691	0.575778	0.671772	0.601165	0.89542	0.398687	0.490902	0.236888	0.416926	0.572921	0.777043	0.223695	0.580772	0.759379
0.502974	0.137691	0.445657	0.345069	0.703704	0.483512	0.720769	0.441255	0.898932	0.173185	0.836387	0.73606	0.244173	0.523938	0.667623	0.231719	0.549434	0.723327
0.701376	0.761551	0.160589	0.64542	0.422611	0.722384	0.335907	0.380726	0.609426	0.862499	0.816891	0.870104	0.128769	0.862499	0.638092	0.558656	0.11979	0.591021
0.210525	0.723025	0.355398	0.382919	0.760777	0.601041	0.370511	0.4888	0.478479	0.713521	0.684034	0.741464	0.681841	0.713521	0.574282	0.499212	0.659438	0.4621
0.610612	0.336452	0.3454	0.784276	0.734866	0.633184	0.752479	0.393999	0.647105	0.526901	0.689409	0.584385	0.774714	0.526901	0.592329	0.719229	0.457609	0.401678
0.358156	0.581307	0.566125	0.592972	0.621159	0.132536	0.448407	0.442862	0.797382	0.881318	0.650145	0.509951	0.43559	0.881318	0.593433	0.136855	0.09661	0.549303
0.902018	0.684992	0.275909	0.543332	0.710833	0.585183	0.371594	0.582305	0.663106	0.630395	0.597388	0.582902	0.764241	0.630395	0.800634	0.5459	0.427461	0.598394
0.584876	0.505357	0.763388	0.320206	0.738999	0.215343	0.584403	0.483535	0.739858	0.730694	0.304343	0.86556	0.519153	0.730694	0.772553	0.645454	0.490479	0.620791
0.762096	0.72415	0.683495	0.0622076	0.728585	0.786628	0.59465	0.711358	0.737215	0.610434	0.225676	0.474374	0.768284	0.610434	0.850674	0.859979	0.671764	0.774516
0.843677	0.708673	0.686952	0.741888	0.339023	0.734825	0.309015	0.792239	0.505492	0.63754	0.560587	0.535761	0.780611	0.63754	0.521481	0.460853	0.63449	0.451083
0.764471	0.701369	0.855907	0.726693	0.358092	0.624845	0.33356	0.494934	0.620055	0.695921	0.570756	0.694954	0.551115	0.695921	0.447253	0.33456	0.401212	0.717589
0.832533	0.898834	0.542298	0.854969	0.332336	0.347595	0.290554	0.479304	0.820478	0.300583	0.390884	0.518692	0.399221	0.300583	0.703435	0.481816	0.659154	0.695904
0.639272	0.569344	0.653353	0.337022	0.611803	0.388654	0.245763	0.435028	0.395767	0.602033	0.902279	0.329958	0.198282	0.602033	0.795431	0.328942	0.65671	0.747003
0.715068	0.37844	0.508167	0.816963	0.35363	0.327994	0.404104	0.622721	0.534567	0.187075	0.843551	0.529838	0.549492	0.187075	0.687922	0.459099	0.729359	0.761914
0.755567	0.62909	0.843533	0.551289	0.534975	0.538369	0.318546	0.716215	0.558887	0.825357	0.62951	0.47137	0.592311	0.825357	0.753477	0.762381	0.263176	0.555314
0.242206	0.793942	0.500195	0.533621	0.739009	0.721111	0.54244	0.637808	0.792043	0.746634	0.693225	0.692463	0.369763	0.746634	0.818393	0.640563	0.834922	0.866637
0.862213	0.46017	0.648158	0.824394	0.371759	0.553986	0.207344	0.564406	0.48924	0.883857	0.830097	0.368159	0.614581	0.883857	0.80273	0.261924	0.158841	0.708731
0.752374	0.56791	0.307454	0.686764	0.527507	0.443857	0.212119	0.450243	0.681018	0.681888	0.716557	0.326833	0.724994	0.681888	0.738268	0.611908	0.313592	0.489846
0.390944	0.451211	0.501595	0.582453	0.646817	0.280029	0.203368	0.527522	0.76556	0.654885	0.49799	0.591958	0.54738	0.541372	0.77063	0.63209	0.640263	0.757719
0.532091	0.577559	0.459714	0.491368	0.533953	0.533471	0.440477	0.38704	0.551833	0.493206	0.693019	0.805335	0.75682	0.890677	0.864993	0.671622	0.258079	0.82732
0.710798	0.59117	0.445563	0.592134	0.647524	0.598218	0.542802	0.561224	0.516025	0.662904	0.491234	0.818659	0.740309	0.654885	0.650053	0.568307	0.103751	0.757264
0.657318	0.646636	0.554806	0.463563	0.644193	0.391646	0.846454	0.31835	0.842391	0.399778	0.508328	0.163581	0.748259	0.493206	0.307132	0.54498	0.639823	0.504781
0.598383	0.885359	0.478173	0.786526	0.584117	0.772336	0.372938	0.432638	0.557712	0.515418	0.606076	0.482599	0.649794	0.410883	0.776131	0.474583	0.572649	0.612948
0.697744	0.753224	0.577647	0.725633	0.478307	0.539901	0.28499	0.453661	0.84115	0.780767	0.689868	0.171046	0.681914	0.768141	0.801744	0.235589	0.454844	0.731865
0.826821	0.883012	0.189976	0.297055	0.697066	0.696939	0.193036	0.584153	0.64125	0.405997	0.851931	0.774348	0.849772	0.662904	0.856774	0.841726	0.59077	0.556967
0.365513	0.317776	0.500957	0.250669	0.751562	0.677112	0.657414	0.727622	0.362836	0.553057	0.682987	0.249543	0.567697	0.399778	0.814946	0.203507	0.415797	0.464001
0.405779	0.547366	0.446923	0.573004	0.25081	0.199639	0.593495	0.220883	0.270014	0.562131	0.710635	0.821214	0.714829	0.843537	0.644609	0.250945	0.126406	0.81556
0.717827	0.18494	0.417753	0.300019	0.681492	0.390199	0.239853	0.184658	0.26328	0.90739	0.636541	0.903295	0.242696	0.430959	0.444991	0.645937	0.5516	0.360629
0.630087	0.621747	0.6377	0.214476	0.378077	0.632498	0.29048	0.673889	0.847835	0.562874	0.287256	0.337313	0.781866	0.548759	0.812805	0.811155	0.489515	0.771287
0.586125	0.766338	0.257193	0.525649	0.313763	0.743791	0.500912	0.376288	0.471427	0.58309	0.707347	0.643039	0.382479	0.284794	0.849335	0.106747	0.635616	0.172953
0.580324	0.779722	0.59499	0.772414	0.643274	0.186283	0.546068	0.669368	0.524423	0.850673	0.594743	0.857398	0.401678	0.515418	0.807795	0.539681	0.602036	0.624996
0.802569	0.197496	0.333392	0.289948	0.674787	0.672721	0.478158	0.721437	0.681203	0.762149	0.472354	0.610814	0.464019	0.780767	0.648618	0.693081	0.739956	0.595148
0.874787	0.498905	0.436858	0.467072	0.45369	0.489393	0.521764	0.559479	0.594864	0.648861	0.347649	0.55668	0.801314	0.405997	0.600046	0.516053	0.737649	0.716395
0.701743	0.641949	0.308624	0.453534	0.813789	0.506711	0.504586	0.421658	0.561304	0.713852	0.701957	0.282397	0.145995	0.553057	0.118472	0.159125	0.458111	0.690062
0.729937	0.68805	0.365512	0.494605	0.609405	0.27323	0.690828	0.300152	0.257871	0.634548	0.473645	0.309678	0.517391	0.509023	0.628815	0.647454	0.497187	0.40397
0.675385	0.226598	0.616066	0.572685	0.660528	0.429748	0.65767	0.22796	0.948683	0.504687	0.717391	0.298771	0.275347	0.0478853	0.951536	0.616986	0.687745	0.361621
0.31361	0.729044	0.404214	0.301612	0.639093	0.478503	0.153893	0.779774	0.146444	0.707248	0.598858	0.345676	0.89542	0.562131	0.64336	0.607824	0.7398	0.51095
0.335027	0.761667	0.781161	0.679428	0.624241	0.736417	0.262308	0.271833	0.896305	0.910383	0.28698	0.509848	0.898932	0.90739	0.683959	0.171536	0.739574	0.78167
0.701208	0.289238	0.630651	0.670135	0.366783	0.407241	0.353176	0.59256	0.526448	0.609921	0.819916	0.543198	0.912772	0.562874	0.913988	0.396275	0.669432	0.619916
0.634508	0.167949	0.632511	0.489785	0.633763	0.680356	0.576503	0.271825	0.489308	0.37828	0.812018	0.466902	0.742845	0.58309	0.679222	0.299762	0.648322	0.575413
0.407729	0.603588	0.477037	0.632986	0.687246	0.672418	0.852404	0.29387	0.380515	0.662511	0.530693	0.810703	0.888742	0.850673	0.629185	0.749229	0.432811	0.470695
0.109713	0.435837	0.683632	0.409709	0.317863	0.598477	0.788555	0.701161	0.664588	0.863933	0.780479	0.489384	0.649922	0.762149	0.375563	0.210987	0.407429	0.133274
0.329074	0.546638	0.485451	0.52726	0.649895	0.480607	0.2564	0.501685	0.771829	0.597142	0.859078	0.547942	0.51318	0.648861	0.519115	0.809609	0.440605	0.386803
0.291618	0.547558	0.725625	0.487084	0.710041	0.742893	0.638435	0.636931	0.87986	0.366766	0.704473	0.722427	0.384241	0.713852	0.603743	0.689863	0.683855	0.505606
0.13711	0.446161	0.148448	0.705509	0.946643	0.370217	0.742774	0.66771	0.530902	0.520894	0.75617	0.530689	0.590615	0.634548	0.355375	0.674656	0.793043	0.458711
0.558895	0.620009	0.162231	0.236571	0.779374	0.660043	0.240158	0.158924	0.90023	0.385599	0.429358	0.189769	0.349502	0.504687	0.544609	0.760933	0.347539	0.56547
0.856643	0.314513	0.29546	0.705373	0.497792	0.485205	0.765221	0.575924	0.639337	0.634075	0.613539	0.60571	0.658318	0.707248	0.725338	0.54871	0.58404	0.616489
0.181616	0.6138	0.70007	0.414618	0.768485	0.802258	0.582705	0.333796	0.527608	0.754491	0.860543	0.634711	0.766724	0.910383	0.653507	0.729627	0.743421	0.51126
0.540844	0.375684	0.210012	0.352962	0.550721	0.607904	0.560572	0.564621	0.400661	0.937797	0.517908	0.494101	0.608919	0.609921	0.639727	0.562697	0.670369	0.340976
0.576839	0.176989	0.615409	0.193323	0.526601	0.498254	0.488499	0.523288	0.378789	0.577432	0.71049	0.391151	0.348546	0.37828	0.474855	0.735086	0.705365	0.339262
0.881889	0.641877	0.584737	0.276838	0.517164	0.370959	0.0996607	0.337033	0.366664	0.733353	0.666781	0.312655	0.334717	0.662511	0.553794	0.474327	0.643679	0.566765
0.839038	0.599691	0.894004	0.507196	0.419549	0.458912	0.244627	0.250554	0.354875	0.282256	0.771305	0.295411	0.672073	0.863933	0.76074	0.550533	0.649629	0.398819
0.725921	0.573018	0.636561	0.575352	0.666728	0.666383	0.700245	0.646704	0.698987	0.693235	0.612396	0.428214	0.751294	0.597142	0.669934	0.616921	0.467179	0.76722
0.507333	0.540225	0.477446	0.447386	0.240322	0.37884	0.546839	0.689624	0.590965	0.593992	0.662333	0.632727	0.860173	0.366766	0.615339	0.534537	0.174926	0.568603
0.654747	0.835369	0.659391	0.839803	0.362984	0.713179	0.310662	0.394254	0.591907	0.743181	0.461382	0.400289	0.467619	0.510085	0.600643	0.768024	0.532995	0.390267
0.747278	0.424892	0.485367	0.475264	0.320205	0.781449	0.604675	0.113799	0.698545	0.547734	0.573166	0.683189	0.551188	0.732613	0.736537	0.186776	0.738419	0.411055
0.430362	0.590595	0.728785	0.642241	0.80831	0.535041	0.606388	0.533147	0.563113	0.960547	0.701679	0.417838	0.609426	0.520894	0.786797	0.673107	0.705248	0.287728
0.82319	0.633126	0.633498	0.152544	0.688122	0.295556	0.676366	0.552507	0.336904	0.512674	0.203956	0.699502	0.478479	0.385599	0.536049	0.627267	0.720622	0.447817
0.550593	0.743904	0.803605	0.608825	0.734828	0.604978	0.550873	0.704279	0.325476	0.652125	0.765047	0.380752	0.418245	0.634075	0.676704	0.307074	0.499629	0.586454
0.486168	0.547848	0.315301	0.428868	0.6873	0.711237	0.701769	0.541802	0.797305	0.301819	0.262806	0.70931	0.463458	0.754491	0.653925	0.432267	0.559804	0.442492
0.748184	0.245754	0.616727	0.807882	0.406072	0.794706	0.572185	0.527984	0.917873	0.68027	0.582348	0.607565	0.868151	0.806883	0.222943	0.63034	0.632525	0.558642
0.829572	0.629944	0.661167	0.654931	0.695723	0.631233	0.337298	0.672587	0.588594	0.947795	0.571182	0.566019	0.690816	0.854669	0.707605	0.371516	0.449271	0.679597
0.858029	0.233771	0.592048	0.659001	0.541556	0.46805	0.708523	0.868726	0.708562	0.393717	0.720775	0.623951	0.647105	0.937797	0.409545	0.591186	0.726712	0.446562
0.862218	0.710206	0.87992	0.322827	0.440424	0.595659	0.493703	0.76532	0.695691	0.195463	0.897812	0.916345	0.797382	0.577432	0.646615	0.128173	0.642013	0.768389
0.228005	0.425807	0.697077	0.611123	0.483931	0.605073	0.449338	0.682107	0.659039	0.677993	0.710237	0.668194	0.663106	0.733353	0.602667	0.339408	0.312815	0.475915
0.734115	0.707857	0.573934	0.517788	0.450548	0.480634	0.424063	0.670741	0.316742	0.607743	0.764498	0.69746	0.739858	0.282256	0.0976238	0.707847	0.397885	0.349257
0.573516	0.601986	0.581526	0.548861	0.427335	0.840439	0.0821141	0.733211	0.783134	0.637452	0.853315	0.388828	0.465698	0.693235	0.712012	0.375762	0.426881	0.51027
0.529702	0.66345	0.606317	0.654814	0.374604	0.374445	0.422275	0.195836	0.765903	0.518629	0.388399	0.224879	0.581762	0.593992	0.2564	0.69929	0.445502	0.672738
0.460844	0.768148	0.696996	0.736245	0.094142	0.781174	0.278841	0.150076	0.642343	0.419936	0.734717	0.59181	0.83969	0.743181	0.915192	0.656059	0.477318	0.785002
0.52754	0.525191	0.521951	0.208677	0.51345	0.729327	0.126403	0.764071	0.42002	0.703626	0.711216	0.707591	0.721038	0.547734	0.773235	0.500607	0.182166	0.446146
0.592303	0.644706	0.639953	0.47704	0.713139	0.869423	0.731653	0.772694	0.662896	0.735097	0.518004	0.773032	0.627525	0.565896	0.658796	0.803209	0.399698	0.171648
0.342685	0.43327	0.419074	0.404257	0.714321	0.557643	0.760638	0.53749	0.557149	0.782343	0.54675	0.307447	0.694802	0.579939	0.670428	0.36124	0.546021	0.75579
0.486636	0.923925	0.416243	0.80564	0.560943	0.376755	0.493713	0.460231	0.468941	0.681397	0.860028	0.610367	0.604387	0.563735	0.45699	0.503477	0.271839	0.607944
0.680417	0.48257	0.788359	0.172154	0.710821	0.247089	0.484704	0.391659	0.823557	0.695768	0.779054	0.689761	0.837908	0.566278	0.58197	0.71379	0.588966	0.640939
0.531793	0.77956	0.389823	0.524144	0.379391	0.586463	0.549994	0.592257	0.717824	0.675682	0.856277	0.296042	0.734612	0.960547	0.748462	0.729124	0.784671	0.499568
0.586931	0.311267	0.526466	0.587569	0.5352	0.81341	0.796849	0.358025	0.792534	0.742687	0.739306	0.799998	0.714966	0.512674	0.583039	0.900258	0.659808	0.495151
0.451019	0.886576	0.383993	0.61746	0.495236	0.437245	0.510137	0.626991	0.5684	0.651071	0.782449	0.296449	0.39587	0.652125	0.74846	0.135706	0.657008	0.633919
0.726909	0.853254	0.435118	0.803976	0.562815	0.612416	0.402513	0.860618	0.527569	0.794038	0.707443	0.183925	0.346969	0.301819	0.823978	0.442692	0.494632	0.599731
0.31454	0.766853	0.692467	0.620087	0.274348	0.664279	0.533774	0.722668	0.505262	0.563835	0.530648	0.623869	0.784882	0.394906	0.642478	0.408909	0.591152	0.0761725
0.562687	0.643407	0.429953	0.450379	0.699308	0.774842	0.539179	0.796862	0.709301	0.818431	0.7002	0.26738	0.924494	0.537182	0.597475	0.292935	0.24621	0.639945
0.638075	0.576678	0.446753	0.478737	0.483944	0.800007	0.503247	0.0623336	0.787559	0.219957	0.236601	0.503394	0.500374	0.569216	0.828522	0.731035	0.730029	0.473583
0.685405	0.611742	0.609086	0.487425	0.674617	0.705699	0.44377	0.856883	0.643593	0.820309	0.834446	0.368577	0.769786	0.34394	0.217709	0.432741	0.720638	0.439942
0.690039	0.750149	0.704772	0.556047	0.706391	0.508232	0.726088	0.651388	0.320962	0.681777	0.624433	0.886332	0.737215	0.567317	0.560191	0.397752	0.633723	0.726999
0.292699	0.734923	0.520124	0.514708	0.870531	0.637174	0.691741	0.700581	0.713803	0.577379	0.598481	0.444767	0.505492	0.1027	0.78592	0.632129	0.569405	0.574945
0.783697	0.743224	0.440891	0.472239	0.266935	0.810816	0.51351	0.400421	0.577465	0.766404	0.493516	0.663621	0.551683	0.417503	0.766562	0.555147	0.545351	0.405119
0.721826	0.726828	0.359091	0.411033	0.638206	0.665899	0.617976	0.242075	0.0959396	0.585314	0.616609	0.338971	0.342215	0.848353	0.378246	0.776751	0.8093	0.550675
0.538819	0.510357	0.231028	0.754038	0.571761	0.633594	0.47005	0.804447	0.576314	0.634237	0.375004	0.560155	0.850691	0.54865	0.560362	0.287193	0.265222	0.659942
0.303511	0.558468	0.477913	0.378047	0.203263	0.46222	0.304725	0.800184	0.669792	0.689615	0.373152	0.559499	0.297817	0.587267	0.570203	0.380288	0.504271	0.292603
0.516404	0.742756	0.463103	0.648336	0.81817	0.636883	0.302979	0.335504	0.752844	0.225466	0.837995	0.490708	0.726223	0.580065	0.732126	0.537665	0.383569	0.338559
0.194412	0.751091	0.703417	0.555498	0.642554	0.628649	0.667999	0.590558	0.724764	0.880318	0.698278	0.632284	0.631439	0.692268	0.592339	0.416082	0.686229	0.732316
0.781467	0.606834	0.519551	0.270715	0.56036	0.269809	0.603025	0.682722	0.661785	0.925205	0.355494	0.47141	0.620055	0.634715	0.791502	0.0388981	0.259724	0.723605
0.119636	0.403659	0.338942	0.452828	0.632686	0.583663	0.610432	0.608961	0.309018	0.788927	0.140183	0.47689	0.820478	0.622458	0.662984	0.819064	0.789379	0.236101
0.748009	0.576178	0.442634	0.553789	0.273449	0.576378	0.611484	0.639909	0.586959	0.496195	0.744555	0.674098	0.941839	0.68027	0.630907	0.370559	0.396448	0.581918
0.67559	0.423035	0.170521	0.40187	0.64127	0.863853	0.67248	0.790354	0.722148	0.680223	0.456527	0.852186	0.866765	0.947795	0.797309	0.716749	0.573137	0.670417
0.892145	0.575613	0.495421	0.676069	0.488448	0.631284	0.783564	0.615344	0.618445	0.795672	0.436073	0.327873	0.635193	0.393717	0.781061	0.799122	0.546813	0.538061
0.586052	0.436437	0.696727	0.74853	0.732808	0.754429	0.620891	0.540839	0.606992	0.827358	0.224251	0.430652	0.681324	0.195463	0.788307	0.525716	0.408352	0.575801
0.606771	0.557938	0.626619	0.573243	0.661394	0.885051	0.514842	0.462559	0.683462	0.504527	0.615653	0.752598	0.466946	0.677993	0.863345	0.445895	0.533052	0.638237
0.31125	0.593685	0.638798	0.568445	0.546111	0.896362	0.531546	0.770091	0.69543	0.401841	0.532963	0.594146	0.481299	0.607743	0.746899	0.485552	0.511741	0.531971
0.700601	0.468481	0.491578	0.5949	0.745979	0.343667	0.547737	0.237619	0.480759	0.480369	0.818484	0.745347	0.550998	0.682094	0.474841	0.578552	0.114517	0.33249
0.340224	0.549015	0.487195	0.183853	0.589757	0.406804	0.666186	0.277686	0.567342	0.355496	0.725857	0.625168	0.675855	0.778615	0.685315	0.817351	0.64569	0.385831
0.910834	0.552252	0.66484	0.577824	0.308707	0.195996	0.379258	0.495479	0.48017	0.679494	0.721741	0.395926	0.395767	0.457578	0.571389	0.578927	0.314934	0.173404
0.383738	0.337828	0.873735	0.581683	0.351677	0.553913	0.360462	0.690043	0.485411	0.825186	0.286329	0.708313	0.534567	0.583298	0.639744	0.716188	0.738207	0.57881
0.689848	0.615275	0.841842	0.440789	0.701609	0.606923	0.631658	0.442944	0.577937	0.0900788	0.872841	0.756224	0.81368	0.637452	0.763914	0.803389	0.78877	0.500603
0.718268	0.599717	0.307489	0.39074	0.214152	0.276004	0.609336	0.669014	0.391781	0.56027	0.643303	0.642178	0.871193	0.518629	0.465577	0.682723	0.401514	0.228122
0.523504	0.388858	0.472719	0.387087	0.715677	0.558753	0.566455	0.342883	0.800671	0.436753	0.760875	0.312144	0.689637	0.531713	0.685438	0.617526	0.110009	0.566673
0.108694	0.534655	0.761295	0.530482	0.604707	0.567936	0.50461	0.443381	0.748817	0.402361	0.361252	0.343326	0.790514	0.517378	0.741031	0.54204	0.69679	0.634931
0.879076	0.067283	0.621395	0.0717568	0.66638	0.491819	0.34957	0.711836	0.450369	0.520493	0.633499	0.425709	0.836514	0.419936	0.572124	0.323666	0.7	0.714545
0.798546	0.0673678	0.730144	0.0756681	0.537513	0.533539	0.398218	0.434267	0.605699	0.13337	0.816536	0.196453	0.796339	0.703626	0.491608	0.698204	0.366061	0.205275
0.75149	0.100222	0.381117	0.096025	0.727281	0.659109	0.381715	0.652985	0.576629	0.570067	0.836173	0.696717	0.81228	0.735097	0.602178	0.450418	0.341376	0.63908
0.605809	0.126123	0.165523	0.124808	0.362186	0.669933	0.511832	0.660375	0.680219	0.584775	0.641651	0.885574	0.505145	0.782343	0.796059	0.7066	0.684418	0.206428
0.79387	0.131792	0.304759	0.139239	0.620123	0.683652	0.661149	0.571226	0.25017	0.882695	0.781587	0.727334	0.33794	0.681397	0.651186	0.651123	0.791459	0.549324
0.670485	0.138124	0.566347	0.146069	0.492812	0.333147	0.174454	0.778021	0.346056	0.866407	0.318443	0.345145	0.485715	0.695768	0.593338	0.76355	0.624918	0.704358
0.665127	0.153632	0.126471	0.152013	0.616809	0.709316	0.344071	0.609122	0.42246	0.800507	0.637103	0.48511	0.572412	0.579906	0.679619	0.565702	0.340437	0.56981
0.600311	0.156034	0.387631	0.157005	0.215352	0.746343	0.544049	0.671968	0.787817	0.685937	0.383185	0.323721	0.329026	0.725344	0.587298	0.175118	0.496918	0.204938
0.674641	0.157707	0.790989	0.179035	0.351604	0.846715	0.399636	0.407283	0.627063	0.687337	0.40745	0.201453	0.646523	0.675682	0.556444	0.0776039	0.678327	0.77214
0.800243	0.187791	0.343587	0.193826	0.423242	0.424642	0.446343	0.502278	0.679153	0.823993	0.560786	0.495907	0.710643	0.742687	0.697078	0.691849	0.713744	0.365228
0.626958	0.189212	0.471774	0.195289	0.721762	0.620678	0.657591	0.655685	0.558339	0.690118	0.857813	0.374647	0.590382	0.651071	0.669346	0.795167	0.346903	0.602963
0.520048	0.19224	0.75447	0.227588	0.600254	0.893349	0.725501	0.0900424	0.517674	0.704983	0.496827	0.678321	0.441904	0.794038	0.326803	0.652294	0.104763	0.21697
0.511531	0.194513	0.375592	0.231837	0.66235	0.461144	0.243236	0.558132	0.699607	0.611447	0.702979	0.580716	0.558887	0.563835	0.666139	0.602387	0.606771	0.517812
0.736511	0.204727	0.489983	0.250068	0.694904	0.622056	0.612097	0.182977	0.217984	0.467818	0.699523	0.415481	0.792043	0.818431	0.609875	0.840412	0.704767	0.373558
0.881854	0.212255	0.482989	0.250666	0.59674	0.155213	0.521539	0.787073	0.740364	0.54702	0.748393	0.535193	0.620976	0.478828	0.619515	0.837998	0.152246	0.690392
0.558893	0.251142	0.692396	0.256287	0.610003	0.774965	0.587177	0.804787	0.552419	0.676323	0.190517	0.149059	0.804919	0.835117	0.511575	0.298497	0.714258	0.76263
0.603351	0.261733	0.606169	0.271461	0.499857	0.449435	0.629704	0.460707	0.318761	0.794144	0.874877	0.420937	0.48924	0.219957	0.812446	0.655057	0.419959	0.526468
0.346783	0.280231	0.616263	0.279362	0.708612	0.46225	0.752585	0.649521	0.631511	0.590937	0.408098	0.812178	0.681018	0.820309	0.828468	0.351092	0.6792	0.894464
0.683961	0.291285	0.487289	0.294765	0.225795	0.347575	0.594352	0.470994	0.691058	0.679864	0.804692	0.548098	0.610566	0.681777	0.708912	0.501844	0.339787	0.398755
0.549118	0.291553	0.47038	0.296639	0.450856	0.353036	0.650819	0.324471	0.311087	0.498647	0.40023	0.272922	0.754402	0.577379	0.586826	0.507845	0.614281	0.576393
0.659192	0.292111	0.82108	0.297675	0.4895	0.661324	0.544524	0.475731	0.555949	0.351199	0.89881	0.561602	0.76556	0.766404	0.598433	0.517121	0.77895	0.426103
0.688455	0.29216	0.323364	0.307741	0.37877	0.0761073	0.743554	0.384406	0.493706	0.645092	0.568838	0.222432	0.551833	0.585314	0.610955	0.239214	0.715675	0.494383
0.774338	0.298259	0.707755	0.308412	0.629801	0.49116	0.497939	0.420806	0.405978	0.13222	0.825465	0.888988	0.516025	0.0946124	0.653191	0.46957	0.0711154	0.529837
0.839806	0.300136	0.583217	0.335278	0.743949	0.426852	0.699118	0.491382	0.886235	0.895554	0.421899	0.264893	0.842391	0.647634	0.459613	0.654891	0.477994	0.273452
0.716334	0.308402	0.365829	0.336374	0.597079	0.302648	0.536665	0.418825	0.637012	0.509616	0.204771	0.418132	0.557712	0.587136	0.726294	0.600499	0.798908	0.603169
0.58422	0.311263	0.190724	0.343954	0.71499	0.291903	0.728683	0.316099	0.731831	0.332594	0.362391	0.580552	0.84115	0.292414	0.712891	0.623839	0.517029	0.508075
0.796343	0.317819	0.305957	0.343999	0.772979	0.0708134	0.398002	0.0821857	0.505988	0.408356	0.213652	0.88589	0.723777	0.489789	0.389251	0.22555	0.453427	0.413534
0.666538	0.33948	0.565464	0.346566	0.847363	0.0938113	0.876713	0.0880425	0.758567	0.060077	0.294178	0.57265	0.488493	0.261304	0.23117	0.430973	0.36761	0.504772
0.72153	0.341149	0.444428	0.346879	0.846161	0.113393	0.626204	0.0900917	0.803359	0.735283	0.708997	0.536425	0.64125	0.634237	0.471167	0.517318	0.581406	0.489884
0.733281	0.342829	0.297591	0.354089	0.34975	0.121346	0.198272	0.122829	0.550388	0.757451	0.556146	0.740939	0.362836	0.689615	0.698828	0.629483	0.629952	0.476509
0.305121	0.345237	0.60888	0.357686	0.670326	0.140261	0.554883	0.131508	0.646805	0.67439	0.827041	0.399084	0.561393	0.810366	0.392984	0.79039	0.571822	0.566951
0.621743	0.3498	0.562483	0.358173	0.598964	0.143686	0.695658	0.149085	0.698901	0.821784	0.832758	0.265573	0.864294	0.273711	0.670955	0.0603895	0.630206	0.173602
0.875886	0.353721	0.295699	0.358545	0.698631	0.145662	0.504894	0.149461	0.121541	0.844731	0.224699	0.813798	0.270014	0.225466	0.791866	0.687911	0.567435	0.463211
0.392368	0.366052	0.543002	0.367968	0.428046	0.166342	0.400579	0.166887	0.516958	0.872172	0.66616	0.52396	0.26328	0.880318	0.542287	0.155328	0.785064	0.670421
0.574943	0.366852	0.298186	0.371459	0.558565	0.172938	0.716417	0.176296	0.658525	0.658022	0.848969	0.740648	0.553644	0.925205	0.562057	0.854179	0.610347	0.810977
0.440781	0.367871	0.36529	0.373506	0.599703	0.176047	0.742287	0.180714	0.661962	0.856105	0.398905	0.492882	0.492339	0.788927	0.616434	0.831885	0.567505	0.538069
0.74749	0.371969	0.613038	0.376229	0.62612	0.21062	0.756254	0.187454	0.7155	0.923784	0.212262	0.543165	0.921905	0.301537	0.594222	0.786415	0.304398	0.536258
0.786375	0.372932	0.472869	0.377205	0.617564	0.227224	0.509219	0.198244	0.872029	0.656535	0.646462	0.165071	0.693501	0.39084	0.596069	0.342656	0.329625	0.507713
0.746108	0.39223	0.403778	0.384288	0.345928	0.233238	0.586447	0.206191	0.436852	0.820882	0.4588	0.533229	0.776038	0.68657	0.740499	0.383179	0.855549	0.590441
0.782356	0.397471	0.407936	0.387691	0.414411	0.244258	0.575212	0.222752	0.608152	0.96486	0.541646	0.929181	0.748931	0.781294	0.737434	0.7616	0.656453	0.384414
0.65946	0.40177	0.545153	0.401348	0.543441	0.247664	0.458226	0.227526	0.501154	0.418046	0.76633	0.512051	0.616555	0.494142	0.590104	0.753481	0.680494	0.632572
0.371082	0.406606	0.614803	0.40221	0.613986	0.252447	0.49512	0.246702	0.723511	0.834093	0.650403	0.684315	0.811915	0.838034	0.734118	0.766646	0.59734	0.447721
0.692669	0.40804	0.680425	0.406862	0.620019	0.260098	0.719224	0.249329	0.718663	0.691445	0.647055	0.443798	0.435025	0.496195	0.764297	0.211775	0.870094	0.351954
0.725837	0.418767	0.505954	0.411963	0.668628	0.261496	0.734615	0.259664	0.706798	0.940878	0.774152	0.473085	0.113341	0.680223	0.820629	0.440222	0.469008	0.621704
0.724578	0.420414	0.231923	0.413478	0.111923	0.26239	0.11363	0.272483	0.791776	0.856795	0.648878	0.560185	0.822036	0.795672	0.58152	0.809576	0.558716	0.489838
0.794165	0.420686	0.74977	0.414869	0.118596	0.274774	0.142273	0.274586	0.390504	0.697185	0.53518	0.879822	0.460693	0.827358	0.837567	0.73967	0.433354	0.140467
0.639118	0.428986	0.523919	0.415569	0.145159	0.294318	0.172144	0.275728	0.234227	0.72139	0.591361	0.326561	0.847835	0.504527	0.600976	0.405122	0.567836	0.516155
0.681763	0.437048	0.40221	0.427627	0.153419	0.298889	0.17793	0.276665	0.581784	0.879589	0.470326	0.750559	0.471427	0.401841	0.405938	0.420302	0.518314	0.359972
0.603505	0.440137	0.628316	0.429487	0.167123	0.304308	0.224316	0.278838	0.788129	0.547913	0.381925	0.753316	0.784849	0.480369	0.836351	0.672772	0.726252	0.614625
0.370689	0.441799	0.137692	0.433774	0.179404	0.309938	0.22437	0.289383	0.161443	0.836235	0.622975	0.285117	0.659035	0.355496	0.360882	0.36187	0.345548	0.255588
0.737064	0.449161	0.339043	0.438145	0.180869	0.323636	0.232381	0.289862	0.603575	0.656336	0.481153	0.669531	0.559368	0.679494	0.451258	0.671168	0.302605	0.366692
0.210866	0.454784	0.187796	0.440303	0.205871	0.326583	0.237973	0.307528	0.606441	0.673292	0.815233	0.629472	0.284861	0.825186	0.796772	0.548336	0.324928	0.257833
0.70592	0.464981	0.66766	0.442746	0.210328	0.327039	0.250305	0.309646	0.515436	0.88732	0.463088	0.165922	0.524423	0.0900788	0.549629	0.667481	0.800771	0.34641
0.575552	0.469827	0.50383	0.447797	0.235761	0.329837	0.258756	0.309973	0.741702	0.890869	0.67333	0.476325	0.681203	0.56027	0.326001	0.522982	0.559488	0.780976
0.812344	0.470464	0.309776	0.449657	0.241579	0.332647	0.261838	0.321579	0.901939	0.510898	0.4245	0.413457	0.594864	0.194064	0.500323	0.469098	0.451437	0.610531
0.83079	0.475522	0.49922	0.450419	0.278721	0.340092	0.271472	0.325339	0.827497	0.551593	0.730914	0.768635	0.561304	0.232288	0.49755	0.6191	0.40891	0.546007
0.824409	0.476781	0.779747	0.451804	0.280512	0.340284	0.27457	0.330428	0.374423	0.611659	0.586776	0.610525	0.808806	0.436753	0.766389	0.638574	0.654614	0.555533
0.789251	0.482536	0.559594	0.453391	0.310885	0.341347	0.279989	0.340872	0.695627	0.711409	0.423356	0.69689	0.65065	0.402361	0.704471	0.300368	0.461276	0.772501
0.545714	0.490323	0.663636	0.453844	0.325508	0.351072	0.291644	0.352646	0.251288	0.48544	0.614729	0.849537	0.257871	0.520493	0.608774	0.221516	0.47114	0.526776
0.823479	0.496593	0.434849	0.456155	0.327369	0.360061	0.315781	0.354797	0.336844	0.75131	0.664451	0.655993	0.948683	0.13337	0.643778	0.817033	0.274503	0.642736
0.402651	0.514096	0.303743	0.457603	0.328156	0.364392	0.317131	0.355851	0.73564	0.757363	0.905685	0.863647	0.488604	0.844558	0.727614	0.425932	0.783552	0.655303
0.5595	0.516258	0.838092	0.457605	0.341251	0.366843	0.318073	0.363899	0.461542	0.356569	0.806199	0.806216	0.762672	0.558932	0.842633	0.521315	0.394994	0.874652
0.512438	0.524973	0.255683	0.461311	0.349335	0.369947	0.318455	0.37622	0.787837	0.884934	0.612849	0.65061	0.848469	0.570067	0.633994	0.80142	0.515351	0.652357
0.244172	0.542477	0.43884	0.461542	0.350226	0.374552	0.346062	0.376787	0.647953	0.257969	0.516659	0.42444	0.549049	0.584775	0.615475	0.598111	0.59684	0.508439
0.863107	0.545377	0.317018	0.464371	0.360351	0.380426	0.353888	0.383944	0.534025	0.662471	0.676771	0.73344	0.789237	0.882695	0.807585	0.770198	0.445454	0.439259
0.233332	0.553603	0.379244	0.465856	0.367054	0.38103	0.367134	0.384685	0.355254	0.526025	0.529927	0.522864	0.478271	0.866407	0.773548	0.348493	0.348929	0.544871
0.728677	0.554131	0.179051	0.466098	0.36744	0.384452	0.369915	0.390098	0.143376	0.771193	0.76186	0.862752	0.38988	0.800507	0.777933	0.0994724	0.339205	0.628325
0.574373	0.559391	0.340306	0.466143	0.375301	0.387326	0.37469	0.412129	0.534699	0.641928	0.224842	0.238215	0.616248	0.685937	0.745891	0.391034	0.489675	0.690133
0.382713	0.55953	0.472618	0.467278	0.394628	0.391081	0.378593	0.415943	0.807618	0.831054	0.715095	0.518109	0.387241	0.687337	0.450071	0.342873	0.660372	0.520893
0.638375	0.561496	0.5422	0.468851	0.399571	0.39118	0.402862	0.416128	0.698815	0.728145	0.863242	0.67752	0.566275	0.823993	0.516379	0.501485	0.315555	0.283859
0.685074	0.562541	0.619414	0.472041	0.407052	0.392488	0.407697	0.420786	0.726556	0.908056	0.282301	0.884185	0.89266	0.690118	0.57837	0.720638	0.727093	0.371567
0.435578	0.565908	0.594576	0.478612	0.433178	0.392871	0.410667	0.421331	0.956688	0.427751	0.636905	0.85973	0.357921	0.704983	0.71469	0.337902	0.581713	0.383113
0.66843	0.571045	0.596135	0.47921	0.435784	0.396579	0.411194	0.421766	0.57031	0.676792	0.228568	0.245076	0.146444	0.611447	0.781612	0.578542	0.703699	0.606678
0.57422	0.577327	0.496702	0.483093	0.442712	0.397	0.41307	0.433372	0.180818	0.551666	0.488305	0.812169	0.896305	0.467818	0.350081	0.738588	0.819197	0.44601
0.776657	0.578992	0.51448	0.485552	0.448216	0.403173	0.42168	0.436067	0.640723	0.912041	0.168883	0.420324	0.72268	0.54702	0.474249	0.60551	0.625683	0.374226
0.792654	0.579362	0.50271	0.487324	0.451286	0.409482	0.425955	0.4372	0.549609	0.832545	0.242289	0.672917	0.666515	0.676323	0.761328	0.627227	0.593981	0.480134
0.50283	0.584039	0.717705	0.487913	0.465757	0.41002	0.427115	0.437419	0.861157	0.596912	0.690712	0.713513	0.526448	0.705416	0.729296	0.637273	0.577226	0.29525
0.671357	0.591619	0.745983	0.489939	0.473137	0.417906	0.43047	0.439639	0.554952	0.585487	0.379273	0.466293	0.489308	0.575999	0.592756	0.16076	0.285285	0.345122
0.604967	0.592162	0.461109	0.494556	0.476282	0.426896	0.43966	0.448621	0.599605	0.587633	0.668692	0.363359	0.778187	0.794144	0.601531	0.267127	0.594898	0.584155
0.602355	0.594651	0.644037	0.496717	0.479907	0.427562	0.458953	0.450965	0.630486	0.862638	0.717789	0.175071	0.64285	0.590937	0.594374	0.676091	0.555376	0.499234
0.188128	0.598255	0.649634	0.49837	0.492045	0.431702	0.473823	0.452313	0.897208	0.524649	0.266856	0.394197	0.380515	0.679864	0.765953	0.717552	0.156722	0.640495
0.741869	0.602097	0.313629	0.499296	0.497508	0.43218	0.477391	0.452753	0.565523	0.332353	0.936005	0.136054	0.664588	0.498647	0.725741	0.914697	0.77342	0.668031
0.882622	0.604679	0.35921	0.499922	0.515219	0.433286	0.481271	0.453957	0.65271	0.587328	0.652291	0.691608	0.526478	0.351199	0.189443	0.580995	0.340658	0.654659
0.651535	0.61524	0.433181	0.509601	0.526537	0.434178	0.488021	0.460408	0.764488	0.479865	0.270974	0.608325	0.209216	0.645092	0.682837	0.519487	0.320563	0.68964
0.655674	0.61636	0.534014	0.510697	0.534657	0.434614	0.491802	0.460889	0.455405	0.689141	0.858769	0.382579	0.687143	0.378922	0.604613	0.558923	0.720055	0.477494
0.36151	0.617354	0.625069	0.51323	0.548371	0.436214	0.494254	0.461639	0.816215	0.650954	0.320991	0.672267	0.696704	0.873186	0.637196	0.5808	0.813508	0.358284
0.695386	0.624438	0.682368	0.515678	0.553831	0.437604	0.497406	0.462548	0.611673	0.905251	0.48857	0.495172	0.881906	0.13222	0.692175	0.837843	0.730641	0.429263
0.736274	0.627262	0.501698	0.527129	0.555714	0.438083	0.499279	0.464497	0.300335	0.577995	0.367637	0.57771	0.370069	0.895554	0.673425	0.494149	0.74618	0.685853
0.570642	0.628869	0.500805	0.527327	0.571213	0.444848	0.507549	0.46624	0.935305	0.747385	0.622909	0.378943	0.608927	0.509616	0.13387	0.543913	0.295493	0.56341
0.378056	0.631546	0.385911	0.529212	0.574416	0.452352	0.509287	0.467129	0.549101	0.480707	0.572454	0.678734	0.640799	0.332594	0.833062	0.473301	0.430803	0.674626
0.776797	0.63183	0.399981	0.534953	0.575704	0.452958	0.522414	0.467539	0.340522	0.524803	0.72086	0.301613	0.741846	0.64808	0.788109	0.451009	0.545368	0.500727
0.542921	0.632273	0.263394	0.536675	0.575891	0.454564	0.527942	0.470705	0.517665	0.747009	0.591879	0.349159	0.74653	0.503219	0.778849	0.603754	0.237722	0.3305
0.763533	0.635138	0.632357	0.541491	0.577601	0.456616	0.54727	0.478111	0.651497	0.87385	0.271217	0.422298	0.489816	0.408356	0.798183	0.602635	0.588622	0.813323
0.481645	0.63651	0.669435	0.541882	0.582293	0.459557	0.548501	0.481063	0.468439	0.774448	0.630163	0.690217	0.424836	0.060077	0.897505	0.66982	0.428956	0.718084
0.61588	0.638065	0.559784	0.544281	0.592882	0.459778	0.550785	0.482757	0.699248	0.88861	0.549288	0.148301	0.456036	0.768298	0.722967	0.73735	0.354371	0.643309
0.773985	0.654629	0.547092	0.546972	0.593318	0.459803	0.556091	0.485915	0.665369	0.641559	0.91555	0.651973	0.500863	0.703125	0.530453	0.679895	0.535935	0.736494
0.400606	0.654906	0.42017	0.549516	0.597782	0.460193	0.55904	0.486677	0.882391	0.793843	0.864072	0.735485	0.606658	0.735283	0.766291	0.45961	0.743417	0.505516
0.729402	0.654996	0.231738	0.54977	0.606176	0.468355	0.571187	0.49055	0.803635	0.619862	0.330141	0.331777	0.844038	0.757451	0.570929	0.0916201	0.570836	0.593233
0.571153	0.65527	0.588327	0.554009	0.607856	0.473601	0.579865	0.49241	0.667752	0.679776	0.79969	0.943737	0.856929	0.67439	0.673352	0.686	0.778983	0.397653
0.64321	0.655557	0.509988	0.555451	0.608065	0.477149	0.58206	0.492715	0.471509	0.323327	0.41031	0.406498	0.467611	0.821784	0.659252	0.539768	0.504995	0.625475
0.0569416	0.657281	0.131824	0.563895	0.611411	0.477368	0.584137	0.493515	0.842635	0.836543	0.883067	0.726464	0.772527	0.844731	0.294846	0.621671	0.511545	0.833363
0.0957103	0.66138	0.167613	0.572049	0.616411	0.47745	0.593627	0.495805	0.884184	0.344505	0.842914	0.519036	0.792427	0.872172	0.887517	0.778485	0.566415	0.764398
0.128949	0.6632	0.179191	0.576256	0.61869	0.477659	0.597644	0.496215	0.849749	0.73518	0.742357	0.456835	0.59372	0.658022	0.61153	0.557061	0.582694	0.5812
0.156148	0.663356	0.184758	0.57637	0.620369	0.482308	0.598627	0.496526	0.631434	0.816239	0.456739	0.185493	0.674644	0.856105	0.586945	0.269728	0.713526	0.66134
0.163643	0.664741	0.224114	0.577519	0.621846	0.485735	0.601032	0.497636	0.528831	0.713791	0.669528	0.328802	0.765552	0.923784	0.787271	0.590972	0.677866	0.672994
0.171136	0.66824	0.228579	0.57853	0.631548	0.48652	0.601339	0.500585	0.774179	0.810775	0.707899	0.0474131	0.812221	0.656535	0.883911	0.645993	0.729862	0.453231
0.237182	0.671297	0.244239	0.580471	0.633607	0.488805	0.601548	0.500602	0.690123	0.900959	0.647463	0.785044	0.364689	0.154993	0.885051	0.283006	0.71231	0.865787
0.260806	0.673035	0.244364	0.581502	0.637115	0.489656	0.605438	0.504949	0.601029	0.537865	0.742124	0.648912	0.33922	0.207692	0.644834	0.293297	0.775448	0.594112
0.344398	0.674418	0.273513	0.590336	0.638641	0.493181	0.610949	0.506303	0.630284	0.942488	0.335084	0.772309	0.771829	0.820882	0.659665	0.547926	0.478784	0.661723
0.349151	0.675567	0.280752	0.604052	0.64266	0.494329	0.614647	0.507363	0.813638	0.690858	0.828032	0.746684	0.87986	0.96486	0.606969	0.715645	0.851292	0.771569
0.350373	0.677223	0.298489	0.604509	0.64311	0.495811	0.61512	0.510471	0.774678	0.925801	0.795858	0.073583	0.530902	0.418046	0.205998	0.614829	0.360484	0.686674
0.375393	0.679947	0.305821	0.612085	0.647602	0.497798	0.615414	0.511718	0.781513	0.85316	0.413913	0.656313	0.90023	0.834093	0.407972	0.633681	0.826608	0.442106
0.397507	0.682743	0.308158	0.613438	0.650289	0.499018	0.618114	0.516014	0.807929	0.700245	0.554112	0.922445	0.886945	0.691445	0.775613	0.581141	0.466992	0.635614
0.409527	0.685906	0.319846	0.622564	0.65468	0.499897	0.620954	0.517984	0.442603	0.825903	0.629086	0.489007	0.717828	0.940878	0.754742	0.204042	0.728165	0.310704
0.452183	0.68751	0.347741	0.624738	0.657724	0.500004	0.623624	0.519773	0.247356	0.518302	0.837471	0.959156	0.392185	0.572513	0.544402	0.665369	0.452469	0.402798
0.462509	0.690258	0.365647	0.629298	0.660868	0.500409	0.62697	0.520115	0.112685	0.552737	0.697892	0.940191	0.659949	0.52783	0.218002	0.426903	0.793301	0.58561
0.503709	0.690666	0.372997	0.629473	0.671458	0.500703	0.634078	0.521141	0.882799	0.0518352	0.720114	0.767778	0.422532	0.856795	0.818535	0.573816	0.603983	0.432911
0.512537	0.694371	0.376991	0.630764	0.676278	0.501449	0.641361	0.523704	0.603425	0.742939	0.636666	0.619609	0.487206	0.697185	0.843147	0.246265	0.873301	0.310491
0.514625	0.702332	0.381146	0.635362	0.678897	0.503178	0.648164	0.52373	0.710056	0.624749	0.688342	0.688896	0.75851	0.590365	0.667121	0.725962	0.587238	0.615771
0.528278	0.702956	0.394333	0.636034	0.684689	0.504248	0.650855	0.525113	0.769342	0.369902	0.548943	0.783494	0.700474	0.443099	0.696164	0.700227	0.714167	0.233654
0.536865	0.703479	0.399319	0.637676	0.688825	0.508075	0.651365	0.526955	0.630172	0.477959	0.779367	0.853655	0.639337	0.72139	0.707473	0.233249	0.600717	0.263532
0.542835	0.709824	0.407404	0.640714	0.693826	0.51092	0.655745	0.528536	0.787636	0.864344	0.65226	0.400262	0.527608	0.879589	0.637072	0.720924	0.12144	0.503983
0.544654	0.71357	0.416373	0.641258	0.694891	0.513657	0.658216	0.529413	0.779762	0.91224	0.834824	0.218524	0.400661	0.547913	0.632981	0.511425	0.809922	0.279612
0.54769	0.719607	0.423171	0.643054	0.712871	0.513981	0.666979	0.529681	0.256138	0.372384	0.577261	0.798913	0.378789	0.836235	0.78863	0.582067	0.654249	0.560445
0.566759	0.7272	0.424205	0.651419	0.71354	0.514137	0.668064	0.531982	0.772669	0.547056	0.170196	0.968414	0.438876	0.656336	0.678383	0.594714	0.52343	0.174487
0.566997	0.728703	0.425922	0.652181	0.719173	0.5151	0.684517	0.533293	0.810756	0.773394	0.761985	0.564845	0.396385	0.673292	0.290637	0.524276	0.584929	0.477562
0.576296	0.732879	0.430201	0.653106	0.723275	0.516878	0.686892	0.53346	0.689073	0.594973	0.838025	0.831372	0.318101	0.88732	0.853223	0.660562	0.669941	0.588772
0.581613	0.738566	0.452598	0.653335	0.727135	0.518906	0.68955	0.534065	0.494366	0.500424	0.439562	0.749547	0.137254	0.890869	0.8228	0.239875	0.210233	0.509908
0.58742	0.741617	0.453857	0.659852	0.748131	0.522432	0.708651	0.534404	0.443773	0.923312	0.569416	0.827538	0.902465	0.510898	0.68705	0.747832	0.546841	0.564299
0.629389	0.742268	0.455204	0.667854	0.752834	0.52364	0.715915	0.53556	0.673915	0.555304	0.430911	0.86151	0.741125	0.551593	0.661725	0.620058	0.542453	0.564812
0.633818	0.747935	0.45615	0.670211	0.758959	0.525517	0.716344	0.536501	0.639861	0.836695	0.873473	0.309779	0.698987	0.611659	0.544799	0.670673	0.545749	0.572653
0.640361	0.748548	0.464816	0.671582	0.760414	0.526285	0.719103	0.537494	0.683373	0.515734	0.792675	0.370751	0.590965	0.711409	0.716701	0.362687	0.229851	0.69234
0.641965	0.74978	0.466522	0.68103	0.761539	0.526933	0.723763	0.54377	0.65098	0.957457	0.722885	0.882804	0.832555	0.48544	0.712978	0.700123	0.148982	0.702648
0.646735	0.751969	0.468114	0.686821	0.765798	0.528338	0.72753	0.545644	0.826742	0.667925	0.726669	0.385995	0.757728	0.75131	0.463465	0.740346	0.567785	0.426705
0.647234	0.753036	0.46858	0.693724	0.766091	0.532288	0.731667	0.546208	0.637608	0.966143	0.948558	0.184406	0.638809	0.757363	0.74941	0.566255	0.558241	0.550421
0.64848	0.758376	0.474473	0.702672	0.768574	0.532561	0.732693	0.546306	0.424053	0.830431	0.904808	0.134077	0.699323	0.356569	0.635044	0.530742	0.856846	0.925744
0.659938	0.77045	0.480125	0.713788	0.771206	0.532837	0.747457	0.546401	0.658874	0.576121	0.805483	0.316023	0.712925	0.884934	0.877808	0.56367	0.541239	0.57678
0.662508	0.77105	0.481053	0.720436	0.771469	0.533177	0.74964	0.546795	0.790163	0.908301	0.352537	0.563317	0.502354	0.257969	0.853268	0.664828	0.561151	0.509619
0.669521	0.773044	0.496034	0.724542	0.785352	0.53505	0.771234	0.548793	0.71092	0.919505	0.243761	0.518725	0.591907	0.662471	0.503424	0.519628	0.798579	0.837038
0.711091	0.775906	0.49839	0.726934	0.786019	0.543129	0.782045	0.550106	0.727948	0.460304	0.891496	0.246117	0.698545	0.526025	0.627365	0.772776	0.675135	0.642439
0.7144	0.776957	0.508489	0.729476	0.792625	0.548734	0.782148	0.550485	0.593957	0.870648	0.70658	0.411473	0.69024	0.771193	0.61741	0.53393	0.67624	0.444594
0.719138	0.783044	0.508626	0.732003	0.80445	0.549829	0.788376	0.551838	0.843857	0.738807	0.340038	0.357877	0.630708	0.641928	0.718803	0.371297	0.157381	0.290768
0.719204	0.783253	0.510964	0.736145	0.806267	0.552809	0.794733	0.551849	0.692473	0.600985	0.721217	0.379211	0.715691	0.831054	0.855594	0.401087	0.571978	0.699902
0.719237	0.791989	0.513928	0.743205	0.809892	0.553416	0.796891	0.555322	0.773378	0.748952	0.419601	0.535229	0.562765	0.728145	0.706767	0.448496	0.523505	0.769491
0.721381	0.800514	0.515184	0.744456	0.822894	0.553507	0.800561	0.556077	0.650344	0.637812	0.725886	0.915711	0.521919	0.908056	0.819683	0.43279	0.374858	0.684542
0.728723	0.804542	0.525931	0.744855	0.833201	0.554765	0.803489	0.556341	0.428547	0.471948	0.771525	0.20196	0.460175	0.427751	0.551337	0.514772	0.628853	0.520975
0.730978	0.808772	0.541688	0.751594	0.83341	0.555993	0.805004	0.556733	0.537287	0.462032	0.744638	0.51093	0.563113	0.676792	0.799659	0.591704	0.388034	0.841114
0.732642	0.821283	0.547659	0.769334	0.836507	0.55771	0.806475	0.561688	0.747117	0.759792	0.395961	0.155714	0.336904	0.551666	0.877434	0.698053	0.540337	0.833619
0.736227	0.824176	0.551678	0.784244	0.839913	0.560439	0.809327	0.564394	0.519207	0.79296	0.28057	0.850445	0.810327	0.912041	0.739486	0.430252	0.851212	0.723665
0.736481	0.835195	0.570425	0.798966	0.841623	0.561453	0.820737	0.564931	0.627196	0.81954	0.399249	0.41353	0.525338	0.832545	0.767459	0.846562	0.464113	0.584771
0.736714	0.836307	0.575963	0.799125	0.846941	0.562647	0.830841	0.566196	0.826655	0.848276	0.769505	0.57619	0.710226	0.596912	0.735944	0.641416	0.328996	0.300563
0.74872	0.836435	0.581657	0.803984	0.853652	0.571028	0.832926	0.567456	0.550104	0.801657	0.486155	0.625553	0.794094	0.585487	0.690777	0.638678	0.642816	0.646076
0.750916	0.839456	0.603635	0.808623	0.872028	0.571699	0.845721	0.568429	0.777205	0.949279	0.867501	0.739445	0.57188	0.587633	0.828347	0.208931	0.370086	0.680112
0.757208	0.853163	0.604499	0.808705	0.876332	0.572389	0.85122	0.568573	0.623153	0.607967	0.865358	0.699466	0.790057	0.862638	0.723868	0.621041	0.329571	0.721651
0.764679	0.860259	0.608406	0.814979	0.877455	0.574358	0.863903	0.569177	0.585837	0.320053	0.635857	0.652799	0.767152	0.45361	0.852019	0.630827	0.619301	0.358415
0.771991	0.863209	0.623287	0.818216	0.896939	0.582575	0.86814	0.569229	0.677692	0.900496	0.662997	0.616447	0.859952	0.686236	0.360592	0.65669	0.405137	0.629077
0.783703	0.868473	0.629562	0.83826	0.090631	0.582728	0.0747841	0.571305	0.776741	0.755753	0.57029	0.959117	0.780299	0.524649	0.665097	0.663072	0.642366	0.857922
0.785345	0.883677	0.642412	0.84849	0.112748	0.582837	0.0983333	0.571309	0.254301	0.572179	0.815369	0.316993	0.762121	0.332353	0.757669	0.767297	0.607793	0.467773
0.78986	0.922392	0.657342	0.874388	0.129967	0.583597	0.119533	0.57173	0.604411	0.748477	0.201615	0.935953	0.527538	0.587328	0.581508	0.657362	0.519109	0.797123
0.795487	0.93294	0.668359	0.878852	0.133933	0.58503	0.130361	0.573119	0.903492	0.76545	0.395231	0.0793905	0.410972	0.479865	0.166075	0.455641	0.291732	0.900086
0.806704	0.0820917	0.673797	0.0580861	0.146016	0.585941	0.148799	0.57459	0.735304	0.620117	0.787687	0.847108	0.729391	0.689141	0.835163	0.809652	0.811633	0.681996
0.810512	0.110971	0.680952	0.0784335	0.155125	0.587812	0.150216	0.578038	0.491632	0.665722	0.66171	0.494382	0.834426	0.650954	0.834105	0.760503	0.728152	0.56106
0.811001	0.128749	0.693843	0.0994388	0.174043	0.588548	0.170213	0.5798	0.775089	0.18217	0.460765	0.116543	0.651518	0.492844	0.722485	0.506842	0.797721	0.53443
0.813132	0.130025	0.701573	0.131652	0.185636	0.588742	0.192915	0.581272	0.619941	0.894114	0.864154	0.282662	0.437131	0.812639	0.189296	0.54489	0.390344	0.426009
0.819446	0.136635	0.710977	0.141369	0.194536	0.58882	0.219498	0.581362	0.172503	0.756847	0.477808	0.67525	0.325476	0.521017	0.614574	0.694242	0.721897	0.846428
0.821629	0.139614	0.730305	0.158936	0.198331	0.593916	0.222812	0.583325	0.609565	0.820664	0.530536	0.773315	0.797305	0.719746	0.804064	0.392754	0.488938	0.72203
0.824951	0.146962	0.738372	0.165504	0.20434	0.597291	0.230647	0.584504	0.647334	0.693527	0.926469	0.88853	0.917873	0.905251	0.495368	0.83179	0.402908	0.734185
0.841053	0.152138	0.777455	0.166775	0.208585	0.597569	0.231842	0.585165	0.575929	0.487079	0.895068	0.545786	0.588594	0.577995	0.76297	0.706553	0.417698	0.433271
0.848923	0.175448	0.7833	0.17119	0.20865	0.59782	0.238766	0.585347	0.650754	0.468039	0.886028	0.55439	0.823778	0.167853	0.7018	0.61022	0.515824	0.622037
0.871265	0.188021	0.803849	0.172131	0.22374	0.599155	0.247038	0.58773	0.495765	0.771973	0.777936	0.615498	0.653158	0.819111	0.738355	0.525515	0.373034	0.674697
0.885245	0.202522	0.813334	0.178058	0.227718	0.605858	0.252424	0.59008	0.590287	0.73118	0.51072	0.60748	0.755736	0.747385	0.606924	0.874607	0.257609	0.804797
0.899849	0.238625	0.814182	0.190566	0.231867	0.606409	0.256923	0.591115	0.847124	0.729488	0.527552	0.648702	0.665617	0.480707	0.306791	0.629499	0.369141	0.537124
0.0478332	0.248187	0.0767139	0.191332	0.250714	0.606854	0.26476	0.593155	0.699078	0.835682	0.417579	0.387681	0.593648	0.524803	0.498844	0.630349	0.657501	0.585705
0.125277	0.251531	0.117419	0.192886	0.253242	0.607818	0.267729	0.593826	0.304655	0.7656	0.518589	0.449431	0.803613	0.747009	0.616625	0.0739255	0.733782	0.873298
0.23377	0.255845	0.153234	0.195939	0.25351	0.610919	0.272305	0.59928	0.597653	0.81532	0.688054	0.540839	0.60805	0.87385	0.563805	0.722121	0.483487	0.378696
0.239496	0.261083	0.169956	0.201212	0.255323	0.61187	0.287967	0.603465	0.680126	0.479079	0.623721	0.83472	0.646934	0.774448	0.715035	0.626499	0.732705	0.791343
0.247408	0.261632	0.211344	0.201235	0.257668	0.613359	0.292524	0.604051	0.559864	0.957518	0.61723	0.112342	0.732075	0.719456	0.238939	0.547009	0.72612	0.733815
0.263884	0.262874	0.226383	0.226213	0.259618	0.61938	0.296522	0.605316	0.32171	0.795664	0.652346	0.811194	0.505075	0.732463	0.794042	0.711624	0.439758	0.765226
0.268918	0.278666	0.250171	0.233541	0.260488	0.621487	0.296843	0.60639	0.873474	0.612722	0.817876	0.671528	0.47402	0.435223	0.130542	0.673208	0.699917	0.524853
0.270117	0.280221	0.266139	0.240813	0.270254	0.621952	0.303263	0.607879	0.680549	0.497662	0.534627	0.663339	0.430217	0.735962	0.919292	0.422351	0.561795	0.701224
0.281943	0.304092	0.287053	0.242561	0.272023	0.622218	0.304507	0.608355	0.701979	0.836495	0.498584	0.774861	0.65485	0.88861	0.712298	0.829383	0.589935	0.400318
0.282296	0.319919	0.290255	0.248625	0.272876	0.629356	0.309063	0.610183	0.589307	0.410127	0.418445	0.847075	0.614109	0.641559	0.853537	0.496067	0.466421	0.746438
0.304008	0.319998	0.293913	0.252308	0.282668	0.631532	0.311007	0.610206	0.33001	0.388308	0.635103	0.492575	0.82901	0.756759	0.547159	0.528018	0.821049	0.688616
0.321445	0.332	0.29655	0.278751	0.286003	0.63336	0.316316	0.612564	0.647887	0.621369	0.857287	0.682764	0.867081	0.178625	0.805457	0.755668	0.742721	0.680693
0.324754	0.342183	0.298893	0.278828	0.28848	0.633891	0.317034	0.616362	0.826345	0.742009	0.925599	0.707895	0.716022	0.921791	0.367708	0.574499	0.316575	0.549462
0.330503	0.348666	0.302932	0.281187	0.292664	0.638488	0.319647	0.616538	0.823329	0.6886	0.191429	0.868691	0.834692	0.884363	0.541399	0.205701	0.195639	0.534542
0.357247	0.355215	0.307092	0.288336	0.295632	0.641788	0.319761	0.617165	0.455339	0.125552	0.509424	0.888231	0.708562	0.836543	0.250902	0.273874	0.621888	0.666209
0.396937	0.357519	0.308991	0.288542	0.297225	0.642317	0.324507	0.618458	0.479709	0.208268	0.274797	0.502367	0.695691	0.344505	0.606601	0.796478	0.522836	0.51167
0.400924	0.371422	0.310639	0.289454	0.299436	0.643128	0.324691	0.62161	0.609728	0.53261	0.662156	0.536759	0.576753	0.343151	0.772171	0.855166	0.805821	0.473771
0.429363	0.372996	0.320105	0.291788	0.302414	0.644078	0.342334	0.622949	0.462335	0.461768	0.670872	0.586569	0.911102	0.703025	0.461817	0.245861	0.734762	0.113317
0.430658	0.37746	0.320637	0.291805	0.307623	0.644935	0.342564	0.624383	0.585786	0.587446	0.5362	0.769127	0.659039	0.404451	0.658663	0.791132	0.51352	0.716632
0.430659	0.379622	0.330338	0.301376	0.327093	0.645243	0.34281	0.624404	0.829628	0.938621	0.511306	0.339446	0.316742	0.877579	0.812448	0.603755	0.745159	0.874074
0.430939	0.383425	0.333035	0.31283	0.32733	0.645586	0.346314	0.627132	0.488151	0.699196	0.652934	0.497378	0.472584	0.759775	0.588793	0.784289	0.523724	0.286653
0.433357	0.384618	0.345205	0.316842	0.329232	0.646495	0.347683	0.632517	0.833555	0.744594	0.208181	0.539017	0.298655	0.69536	0.685261	0.188726	0.422927	0.580604
0.440514	0.395846	0.358403	0.319489	0.341225	0.64702	0.35226	0.633183	0.890214	0.784496	0.779573	0.156473	0.783134	0.713791	0.633712	0.918406	0.695435	0.564083
0.458271	0.400675	0.365624	0.323924	0.34366	0.65123	0.357793	0.636472	0.504418	0.630951	0.870349	0.664833	0.765903	0.810775	0.842341	0.398394	0.804352	0.503035
0.467426	0.401227	0.365944	0.324713	0.344442	0.652153	0.359215	0.636804	0.80272	0.311173	0.641958	0.724328	0.858977	0.900959	0.543493	0.514154	0.74182	0.775109
0.476469	0.412724	0.366445	0.324771	0.345551	0.652619	0.359632	0.640649	0.856428	0.497211	0.788675	0.653105	0.866999	0.537865	0.378199	0.597372	0.786941	0.262391
0.479309	0.419617	0.370727	0.33484	0.34874	0.654146	0.360431	0.642611	0.290014	0.735821	0.742566	0.765285	0.561529	0.879186	0.820125	0.352206	0.352892	0.487049
0.493828	0.420466	0.37829	0.337741	0.351889	0.655454	0.364442	0.644506	0.241326	0.639435	0.525573	0.633376	0.844463	0.37145	0.540308	0.462922	0.258158	0.582831
0.523204	0.428766	0.383512	0.34859	0.366529	0.656449	0.371699	0.644798	0.679082	0.613915	0.792099	0.859514	0.880835	0.942488	0.621049	0.700731	0.301744	0.498634
0.529674	0.431093	0.394093	0.351291	0.367893	0.657848	0.374622	0.647978	0.147674	0.271372	0.349077	0.690218	0.84517	0.690858	0.562729	0.504301	0.534253	0.396821
0.532176	0.43258	0.397159	0.356334	0.372512	0.663126	0.377555	0.648993	0.7008	0.5904	0.209765	0.636026	0.739466	0.760839	0.297768	0.124304	0.69047	0.754093
0.536197	0.435024	0.400772	0.356403	0.373323	0.666692	0.37958	0.651371	0.890071	0.520308	0.833567	0.486145	0.507829	0.897508	0.67432	0.287415	0.488511	0.613339
0.542822	0.435151	0.412885	0.359841	0.374279	0.669639	0.382842	0.652263	0.83549	0.829492	0.541686	0.293382	0.626773	0.91862	0.604462	0.748628	0.893499	0.541981
0.544811	0.437007	0.418278	0.362294	0.390088	0.670569	0.384326	0.653348	0.67173	0.645887	0.583982	0.755449	0.767108	0.190041	0.362527	0.596704	0.667659	0.553545
0.550289	0.438188	0.419846	0.363785	0.398145	0.671359	0.387953	0.654815	0.319091	0.78831	0.634108	0.333971	0.580424	0.700245	0.61138	0.648693	0.663267	0.275592
0.559218	0.448982	0.438622	0.36485	0.402716	0.672266	0.392021	0.656119	0.685418	0.883409	0.604701	0.775492	0.788605	0.825903	0.0745601	0.581688	0.738018	0.317393
0.562159	0.45218	0.442192	0.370576	0.407641	0.673119	0.397816	0.656709	0.517842	0.672612	0.923246	0.7836	0.905346	0.518302	0.593088	0.479934	0.766119	0.53288
0.568485	0.454077	0.443262	0.372321	0.417512	0.674519	0.402151	0.658189	0.411412	0.89516	0.147008	0.455327	0.490133	0.552737	0.504048	0.651423	0.331285	0.390895
0.578209	0.460143	0.449654	0.373346	0.419577	0.676571	0.407758	0.658833	0.59166	0.566447	0.377676	0.903451	0.49957	0.0518352	0.626688	0.715017	0.520114	0.471063
0.581897	0.460782	0.465338	0.376278	0.423192	0.678028	0.414342	0.661858	0.291265	0.902347	0.434251	0.33904	0.697947	0.742939	0.516697	0.74552	0.539923	0.336327
0.591412	0.46199	0.466765	0.380689	0.426452	0.680009	0.415088	0.662275	0.194891	0.612388	0.238633	0.225634	0.602977	0.75066	0.629537	0.43664	0.35823	0.556593
0.596143	0.467413	0.470186	0.381431	0.426506	0.680139	0.418362	0.663501	0.622731	0.268499	0.361752	0.888036	0.31963	0.690806	0.411816	0.441952	0.64437	0.471109
0.59694	0.478459	0.47504	0.387204	0.426677	0.68229	0.41857	0.664024	0.818469	0.652658	0.761799	0.343932	0.662896	0.84545	0.496982	0.60376	0.567114	0.308439
0.599407	0.479153	0.486704	0.389123	0.429491	0.68506	0.418787	0.666708	0.939357	0.700588	0.903478	0.23281	0.557149	0.256459	0.407307	0.416855	0.660039	0.685516
0.605652	0.480154	0.486756	0.390173	0.43066	0.689324	0.425442	0.6681	0.717156	0.423831	0.67191	0.539555	0.814335	0.713544	0.533492	0.629211	0.716998	0.74204
0.606311	0.483314	0.486934	0.39072	0.434186	0.689332	0.425927	0.668479	0.709406	0.596072	0.592694	0.632776	0.17731	0.774101	0.0725947	0.625847	0.504985	0.498293
0.611605	0.483699	0.500572	0.391029	0.439917	0.690264	0.426246	0.670018	0.552092	0.620568	0.495166	0.434859	0.466804	0.303077	0.847184	0.617315	0.364309	0.60106
0.61463	0.484103	0.501254	0.39194	0.441898	0.693502	0.426369	0.670937	0.665204	0.923843	0.546244	0.544845	0.376208	0.82094	0.703538	0.546917	0.182593	0.687937
0.622612	0.484851	0.501472	0.397951	0.446703	0.69359	0.427533	0.671107	0.815905	0.799184	0.63532	0.675665	0.427961	0.641049	0.796261	0.398066	0.784023	0.59378
0.622855	0.493753	0.501703	0.400084	0.446919	0.694891	0.433894	0.673336	0.535129	0.163438	0.496371	0.550713	0.592316	0.75342	0.762368	0.283304	0.312993	0.295696
0.623651	0.49583	0.503207	0.402158	0.451097	0.697895	0.43462	0.674677	0.69547	0.431436	0.546981	0.70146	0.470232	0.896545	0.336824	0.319479	0.565138	0.603195
0.636661	0.499005	0.52532	0.402264	0.457573	0.698033	0.435164	0.67674	0.71971	0.571706	0.226283	0.779226	0.590486	0.92003	0.681881	0.447239	0.180474	0.537603
0.642292	0.500989	0.530106	0.403537	0.464305	0.701652	0.435523	0.678459	0.505443	0.852597	0.63272	0.131091	0.468941	0.477959	0.560991	0.404117	0.877072	0.761867
0.6468	0.501992	0.532867	0.404433	0.465678	0.70219	0.437348	0.679388	0.36115	0.722468	0.358159	0.898683	0.823557	0.864344	0.422155	0.657287	0.644034	0.336589
0.652119	0.502111	0.5446	0.406048	0.466148	0.702682	0.438735	0.679983	0.756866	0.842324	0.559046	0.881461	0.177028	0.91224	0.721379	0.545206	0.689475	0.623172
0.653989	0.508913	0.545351	0.409898	0.46755	0.703622	0.441782	0.68277	0.803934	0.763283	0.210968	0.556599	0.523688	0.372384	0.509077	0.195504	0.578379	0.492459
0.657832	0.51345	0.546095	0.410619	0.469753	0.703693	0.442438	0.683125	0.518627	0.57916	0.858212	0.509386	0.713481	0.861173	0.603319	0.469556	0.618956	0.552297
0.661062	0.519384	0.552691	0.410986	0.471888	0.705662	0.445294	0.684279	0.548485	0.369546	0.213267	0.573501	0.821879	0.555022	0.454003	0.552572	0.596884	0.66742
0.664783	0.523969	0.572961	0.411881	0.472915	0.705771	0.450105	0.686467	0.313764	0.943525	0.106795	0.933706	0.717824	0.759224	0.531221	0.61904	0.490933	0.457997
0.664887	0.527349	0.578531	0.412703	0.473068	0.711131	0.45556	0.686694	0.605842	0.760134	0.739037	0.513658	0.792534	0.764929	0.688625	0.353994	0.551987	0.360264
0.671684	0.529873	0.581714	0.413375	0.473526	0.711645	0.456138	0.689606	0.174391	0.430385	0.656115	0.781231	0.749632	0.895692	0.626566	0.408195	0.407104	0.802387
0.671748	0.530129	0.587807	0.414326	0.475928	0.71294	0.457643	0.690875	0.301562	0.521489	0.349244	0.473029	0.584466	0.446165	0.82281	0.326021	0.101292	0.611498
0.676278	0.536883	0.588193	0.415877	0.477363	0.713694	0.458982	0.693816	0.856281	0.302322	0.283962	0.893317	0.855887	0.302702	0.627154	0.602926	0.6615	0.263964
0.67728	0.538079	0.588984	0.415999	0.482009	0.716752	0.466812	0.695018	0.806293	0.299088	0.1562	0.3995	0.753316	0.86533	0.52198	0.779699	0.647759	0.606936
0.680339	0.541373	0.592003	0.41774	0.483319	0.716814	0.468944	0.69528	0.488564	0.829423	0.691386	0.762276	0.649614	0.844934	0.656903	0.603017	0.795197	0.720282
0.685249	0.54261	0.593242	0.418307	0.484596	0.71691	0.469122	0.697584	0.755413	0.668474	0.838429	0.556109	0.129719	0.752249	0.341945	0.558871	0.475714	0.518099
0.687784	0.544058	0.59387	0.422828	0.486658	0.718424	0.472393	0.698415	0.706303	0.176923	0.763267	0.494049	0.593095	0.594973	0.708129	0.300473	0.635639	0.658018
0.688101	0.547446	0.598289	0.424352	0.487913	0.719071	0.473544	0.70337	0.746681	0.480792	0.748564	0.686537	0.834292	0.500424	0.221885	0.473012	0.181247	0.555045
0.68956	0.550916	0.598789	0.424827	0.488283	0.72174	0.474025	0.703783	0.553297	0.181833	0.447333	0.631843	0.5684	0.727972	0.595174	0.553057	0.529142	0.701683
0.707457	0.55184	0.598952	0.426368	0.489145	0.722191	0.47434	0.704117	0.580019	0.156538	0.59286	0.544599	0.527569	0.912367	0.723479	0.633136	0.15084	0.330968
0.711266	0.552338	0.599427	0.428582	0.491842	0.724897	0.474478	0.708062	0.679154	0.698152	0.396064	0.72608	0.568738	0.836695	0.709392	0.268515	0.661862	0.677217
0.714541	0.556316	0.600887	0.428624	0.49898	0.725248	0.47521	0.708573	0.516963	0.697958	0.914831	0.553453	0.508344	0.515734	0.510264	0.304503	0.598291	0.687481
0.714669	0.560253	0.601344	0.42936	0.500287	0.732126	0.480239	0.710983	0.36703	0.5727	0.593605	0.596377	0.336388	0.874838	0.629595	0.663132	0.631827	0.675651
0.715073	0.562319	0.611316	0.43103	0.50193	0.732766	0.481504	0.712558	0.885844	0.86225	0.665152	0.208473	0.662548	0.760937	0.621522	0.587622	0.81887	0.714761
0.721649	0.563991	0.615531	0.433276	0.505242	0.732888	0.481706	0.712577	0.485216	0.76621	0.781897	0.235642	0.705918	0.841997	0.363674	0.598423	0.459749	0.572121
0.721837	0.564943	0.627352	0.434384	0.509684	0.73332	0.4833	0.712645	0.490404	0.697023	0.548004	0.595223	0.54404	0.649163	0.409942	0.560673	0.813983	0.3441
0.722351	0.569992	0.63064	0.436115	0.512189	0.734018	0.484019	0.718065	0.502466	0.856945	0.310535	0.701198	0.505262	0.957457	0.599022	0.497843	0.289715	0.451803
0.722905	0.571312	0.632424	0.438233	0.512403	0.734336	0.486563	0.719229	0.863793	0.154515	0.507124	0.695619	0.709301	0.667925	0.531122	0.479341	0.894699	0.600199
0.729289	0.572353	0.638344	0.440171	0.514544	0.734806	0.487128	0.721072	0.536273	0.726729	0.817832	0.714593	0.534384	0.966143	0.449679	0.609121	0.784889	0.135935
0.731945	0.573512	0.642715	0.453991	0.514608	0.735639	0.488842	0.723747	0.860744	0.782581	0.699329	0.325026	0.522679	0.830431	0.706241	0.587801	0.758892	0.650357
0.732791	0.575652	0.642864	0.456587	0.516139	0.737872	0.490436	0.723747	0.683216	0.752362	0.616274	0.542589	0.664558	0.576121	0.495382	0.350464	0.715264	0.703286
0.748259	0.579988	0.64933	0.458408	0.520457	0.737876	0.490755	0.725691	0.846084	0.126184	0.64958	0.583493	0.725602	0.908301	0.37537	0.201034	0.763283	0.474188
0.76098	0.58091	0.654345	0.459862	0.521269	0.738082	0.490855	0.728002	0.966572	0.38368	0.061818	0.864428	0.320962	0.763314	0.652812	0.25768	0.332507	0.774548
0.768164	0.581234	0.656115	0.459934	0.521574	0.739456	0.492057	0.728516	0.54138	0.548787	0.704336	0.114509	0.713803	0.41893	0.550307	0.721912	0.21883	0.446915
0.775398	0.583751	0.657323	0.463249	0.523071	0.743434	0.492834	0.728538	0.853186	0.894066	0.701123	0.52019	0.494648	0.609329	0.913408	0.218873	0.798898	0.377574
0.776489	0.584682	0.657639	0.463738	0.530435	0.746645	0.49587	0.733515	0.515605	0.372487	0.607568	0.513196	0.412536	0.740573	0.726804	0.604918	0.219089	0.355535
0.778324	0.586111	0.661898	0.466067	0.53294	0.747674	0.496134	0.735839	0.728556	0.83291	0.254504	0.311414	0.529471	0.919505	0.721221	0.368127	0.520013	0.484806
0.779224	0.586853	0.665399	0.466163	0.53344	0.748218	0.499474	0.737202	0.834611	0.601727	0.349044	0.811152	0.444666	0.460304	0.399924	0.323992	0.84667	0.0578597
0.781121	0.589513	0.665802	0.466907	0.535549	0.749066	0.499596	0.737285	0.758009	0.623651	0.685899	0.0749011	0.577465	0.883745	0.577741	0.319676	0.780676	0.585763
0.784503	0.59177	0.698352	0.469384	0.538162	0.750194	0.503145	0.739094	0.922228	0.115942	0.714548	0.52306	0.0959396	0.348812	0.133059	0.68235	0.756	0.0233232
0.784519	0.591929	0.704092	0.471505	0.538849	0.754091	0.503642	0.740226	0.550756	0.473375	0.603753	0.523944	0.565375	0.703089	0.49538	0.688788	0.648741	0.323761
0.78833	0.592054	0.705589	0.472471	0.541525	0.757144	0.504058	0.741852	0.896142	0.405761	0.43991	0.436894	0.632161	0.410008	0.665116	0.483732	0.721765	0.408365
0.79197	0.592347	0.706448	0.475178	0.542838	0.75821	0.509043	0.74195	0.930406	0.335533	0.522673	0.844963	0.765724	0.600985	0.820843	0.689025	0.485946	0.659767
0.793702	0.59484	0.708225	0.475336	0.544872	0.76459	0.510656	0.742894	0.739303	0.647888	0.620116	0.344207	0.531434	0.748952	0.63484	0.417162	0.169895	0.39725
0.815563	0.595366	0.713023	0.476937	0.545318	0.764704	0.510799	0.744483	0.772776	0.736946	0.918982	0.735781	0.556314	0.629867	0.580656	0.723598	0.144963	0.462055
0.819663	0.597227	0.717343	0.483682	0.550747	0.774237	0.515179	0.748199	0.199943	0.271899	0.720229	0.687159	0.681246	0.568893	0.396023	0.730626	0.517823	0.712585
0.820901	0.601569	0.726239	0.485546	0.5519	0.777449	0.515495	0.7482	0.634418	0.78755	0.158254	0.720336	0.681827	0.73069	0.828991	0.723096	0.749019	0.527621
0.821858	0.604368	0.733131	0.48692	0.552901	0.77814	0.515583	0.748297	0.867237	0.235558	0.62017	0.192525	0.891835	0.662924	0.53218	0.259548	0.501152	0.471952
0.824533	0.605806	0.73619	0.487667	0.553147	0.779738	0.516044	0.748432	0.553644	0.813999	0.715415	0.453417	0.364359	0.871425	0.733929	0.372331	0.925153	0.462398
0.824897	0.607007	0.750705	0.488053	0.553391	0.781431	0.516395	0.749501	0.337614	0.376888	0.396573	0.605423	0.242196	0.763658	0.748593	0.266433	0.681449	0.623571
0.826528	0.609167	0.759783	0.488669	0.553549	0.782746	0.51788	0.750218	0.881284	0.355711	0.768053	0.375568	0.76901	0.637812	0.790615	0.326896	0.464058	0.5747
0.830165	0.610763	0.779345	0.489566	0.554412	0.783745	0.522067	0.75277	0.799399	0.156038	0.691684	0.819221	0.567168	0.471948	0.659513	0.131616	0.551809	0.31275
0.833258	0.611022	0.790319	0.494515	0.558239	0.783878	0.52656	0.752924	0.724558	0.843316	0.781811	0.800536	0.576314	0.91777	0.743388	0.520724	0.498302	0.3095
0.834884	0.612628	0.79264	0.495547	0.558306	0.785148	0.527364	0.755155	0.793868	0.764568	0.204149	0.461995	0.669792	0.653523	0.378855	0.556144	0.524837	0.612116
0.836274	0.612694	0.794076	0.497072	0.560139	0.787997	0.527603	0.756533	0.444629	0.714115	0.366165	0.326479	0.323799	0.462032	0.610289	0.24445	0.607151	0.129468
0.858814	0.616667	0.79901	0.498874	0.560753	0.789791	0.528132	0.758303	0.775165	0.580145	0.780301	0.833899	0.138409	0.759792	0.660239	0.550144	0.200299	0.741989
0.88344	0.618343	0.822206	0.501109	0.561153	0.790856	0.529261	0.759794	0.437901	0.753853	0.884396	0.73954	0.57163	0.79296	0.880429	0.587366	0.341395	0.570231
0.890605	0.621707	0.830187	0.50424	0.5617	0.791419	0.529815	0.766213	0.516066	0.817226	0.540644	0.78992	0.289678	0.81954	0.869933	0.214504	0.389992	0.76955
0.893012	0.626752	0.835319	0.505659	0.561954	0.792067	0.533425	0.768435	0.74278	0.909335	0.709023	0.890341	0.702688	0.845514	0.542166	0.717823	0.293646	0.615341
0.913154	0.627302	0.903057	0.507317	0.563921	0.79381	0.533785	0.771464	0.695107	0.494051	0.8031	0.474165	0.10365	0.637665	0.648949	0.489844	0.759477	0.630523
0.0294735	0.627491	0.0161561	0.507526	0.564548	0.795009	0.535122	0.772306	0.401576	0.811134	0.669547	0.832869	0.752844	0.647766	0.764894	0.595413	0.373284	0.602279
0.0794484	0.628033	0.0916055	0.510532	0.564962	0.795656	0.536978	0.774107	0.756877	0.511589	0.763263	0.598408	0.724764	0.840381	0.583762	0.24336	0.709968	0.715954
0.0851649	0.628166	0.102873	0.512618	0.569034	0.798206	0.538294	0.774712	0.871883	0.786978	0.312142	0.742591	0.661785	0.848276	0.677087	0.800904	0.850805	0.740818
0.0860246	0.628803	0.105531	0.513114	0.569845	0.800714	0.538541	0.775988	0.704687	0.7792	0.164542	0.138384	0.309018	0.801657	0.635331	0.26946	0.787117	0.600225
0.0871216	0.629349	0.110514	0.513522	0.572128	0.804218	0.540271	0.777129	0.366251	0.715067	0.34747	0.597532	0.715108	0.600415	0.781364	0.767491	0.644697	0.392837
0.10411	0.630271	0.117818	0.515086	0.572913	0.806304	0.54121	0.77901	0.724323	0.495237	0.719354	0.383955	0.322727	0.674777	0.217611	0.389452	0.731549	0.125145
0.112423	0.631483	0.126563	0.51548	0.574589	0.808077	0.541603	0.782641	0.895993	0.889521	0.695108	0.416897	0.586959	0.916472	0.487576	0.766089	0.893827	0.616683
0.11302	0.633671	0.135497	0.517557	0.574631	0.808913	0.541943	0.784723	0.656425	0.541748	0.210587	0.553201	0.722148	0.734328	0.675346	0.7287	0.854505	0.701627
0.113843	0.638199	0.148522	0.521652	0.576503	0.810733	0.543236	0.791948	0.224097	0.529794	0.675735	0.780421	0.618445	0.949279	0.369239	0.625169	0.761796	0.461649
0.123542	0.638937	0.149903	0.523254	0.583065	0.81456	0.544922	0.792783	0.816771	0.532186	0.785916	0.673061	0.606992	0.607967	0.697382	0.752954	0.891496	0.713228
0.128283	0.642194	0.157276	0.526793	0.583592	0.825809	0.547528	0.800224	0.331228	0.831022	0.642954	0.34514	0.862206	0.755753	0.731744	0.41461	0.582547	0.460121
0.145874	0.643758	0.158679	0.527372	0.5853	0.827353	0.549935	0.803827	0.761243	0.478602	0.593462	0.731849	0.487262	0.572179	0.651644	0.489591	0.454481	0.422338
0.146008	0.648164	0.165104	0.52823	0.585433	0.828815	0.550413	0.804103	0.627592	0.519459	0.627199	0.830267	0.674892	0.676372	0.730981	0.75147	0.863579	0.472338
0.148133	0.650936	0.16791	0.529541	0.585448	0.82889	0.552414	0.805367	0.894179	0.486898	0.808024	0.662615	0.731538	0.552402	0.741155	0.529526	0.56159	0.175667
0.14976	0.652019	0.180651	0.533449	0.586438	0.829584	0.552482	0.807589	0.819011	0.446539	0.861672	0.467353	0.683462	0.620117	0.589019	0.504049	0.627943	0.391167
0.150958	0.652794	0.18392	0.535453	0.589211	0.831694	0.552684	0.811147	0.733647	0.530031	0.596744	0.740308	0.69543	0.665722	0.637438	0.49194	0.444103	0.568747
0.157688	0.654107	0.18627	0.535614	0.589815	0.833425	0.553799	0.81308	0.71423	0.515697	0.482717	0.249366	0.618222	0.39722	0.640426	0.531332	0.787239	0.331764
0.160103	0.654891	0.191988	0.535825	0.590204	0.83591	0.554176	0.816124	0.783107	0.375368	0.351255	0.535628	0.629599	0.616108	0.629631	0.392102	0.733864	0.654197
0.163823	0.657586	0.192521	0.535861	0.592263	0.838693	0.555606	0.81649	0.877628	0.560713	0.636356	0.547654	0.480759	0.488442	0.900151	0.637706	0.311428	0.643435
0.173909	0.657702	0.193283	0.537228	0.592649	0.840999	0.556692	0.816752	0.298955	0.690723	0.777201	0.92973	0.567342	0.842439	0.122625	0.355523	0.544158	0.783976
0.179126	0.658522	0.19353	0.537322	0.593657	0.844281	0.558815	0.821314	0.388279	0.741817	0.397479	0.426206	0.821336	0.829808	0.499517	0.607257	0.341609	0.728739
0.184262	0.660577	0.197686	0.5375	0.594389	0.852607	0.563253	0.822241	0.47663	0.452521	0.350527	0.433149	0.829863	0.646876	0.814585	0.333573	0.567229	0.620577
0.187921	0.660668	0.201574	0.538562	0.595091	0.853643	0.563333	0.824762	0.819507	0.686307	0.920384	0.817728	0.451041	0.694343	0.589081	0.269566	0.714168	0.733212
0.199632	0.667215	0.205138	0.540495	0.59513	0.860791	0.56354	0.826191	0.946537	0.555609	0.512432	0.538852	0.213275	0.839561	0.314367	0.513513	0.696777	0.570944
0.215568	0.667461	0.207601	0.541151	0.596579	0.861224	0.564305	0.832844	0.769773	0.698355	0.727358	0.627023	0.647325	0.690258	0.816718	0.668323	0.683624	0.626897
0.21686	0.670648	0.217483	0.54125	0.597329	0.861247	0.565499	0.835212	0.870256	0.253591	0.240915	0.68692	0.733874	0.592162	0.47777	0.474226	0.666932	0.35126
0.219941	0.670903	0.218363	0.543002	0.598236	0.870116	0.565559	0.8356	0.54278	0.542463	0.849311	0.828655	0.639818	0.577327	0.759995	0.582966	0.345263	0.699625
0.222528	0.672698	0.219545	0.54481	0.601479	0.872315	0.567931	0.835833	0.723731	0.614829	0.108051	0.631035	0.791882	0.791989	0.765821	0.470412	0.566789	0.647754
0.224525	0.672891	0.225385	0.545566	0.603813	0.882715	0.569299	0.838751	0.336792	0.638271	0.724951	0.706145	0.174662	0.562541	0.243089	0.320571	0.410959	0.622955
0.227121	0.673743	0.240027	0.546572	0.604691	0.884246	0.569661	0.842754	0.820205	0.398631	0.62716	0.624974	0.455377	0.836307	0.786249	0.73113	0.801822	0.160339
0.238161	0.676908	0.241404	0.546933	0.604692	0.889316	0.570732	0.845191	0.573532	0.778277	0.150224	0.717723	0.48017	0.261733	0.780332	0.423991	0.122352	0.36587
0.23933	0.679485	0.253964	0.548029	0.606119	0.889498	0.57109	0.852843	0.872535	0.739653	0.511141	0.824536	0.485411	0.628869	0.167223	0.14484	0.69006	0.470996
0.242126	0.681976	0.255094	0.549418	0.608641	0.892591	0.57278	0.855091	0.890624	0.51358	0.695558	0.369711	0.577937	0.204727	0.701714	0.619699	0.796676	0.238536
0.243404	0.682737	0.255262	0.549969	0.609014	0.896286	0.574009	0.861881	0.911487	0.642629	0.163475	0.359003	0.391781	0.753036	0.617672	0.404065	0.646	0.727349
0.245866	0.686138	0.255275	0.552563	0.609121	0.904942	0.575269	0.863092	0.144678		0.497422		0.800671	0.579362	0.836687	0.436257	0.537077	0.787763
0.256629	0.686762	0.256147	0.55671	0.611248	0.90667	0.576469	0.8743	0.225848		0.806553		0.748817	0.437048	0.675088	0.343183	0.554126	0.594041
0.263874	0.687943	0.259501	0.556976	0.613153	0.917794	0.57699	0.901294	0.67407		0.676245		0.386143	0.63183	0.60389	0.643151	0.829131	0.787637
0.267134	0.688303	0.263017	0.557288	0.614824	0.922077	0.577582	0.926352	0.734477		0.227259		0.685742	0.631546	0.107049	0.355664	0.623743	0.535594
0.275863	0.688595	0.29153	0.557463	0.617825	0.930488	0.578716	0.927677	0.837053		0.224506		0.78397	0.685091	0.425515	0.272764	0.81137	0.448584
0.278545	0.689992	0.293436	0.56333	0.620527	0.96467	0.578845	0.93352	0.86482		0.461113		0.545062	0.42625	0.471125	0.514697	0.606004	0.183266
0.279445	0.690196	0.29828	0.565228	0.621641		0.582076		0.915527		0.435095		0.450369	0.726792	0.701102	0.585069	0.643405	0.594885
0.279844	0.693697	0.303874	0.56642	0.622214		0.582659		0.802359		0.925483		0.605699	0.864464	0.585679	0.294798	0.592294	0.555672
0.280023	0.694219	0.304251	0.56806	0.622318		0.584927		0.78029		0.734928		0.79437	0.524973	0.722736	0.555795	0.46225	0.525031
0.290637	0.696402	0.304962	0.572187	0.623297		0.587558		0.788416		0.544848		0.452782	0.703479	0.509112	0.731333	0.696589	0.651494
0.295222	0.697115	0.306529	0.572933	0.623902		0.587772		0.530859		0.444882		0.545878	0.783253	0.177496	0.664345	0.37904	0.136805
0.302589	0.698485	0.308837	0.575387	0.626759		0.588131		0.796587		0.665222		0.665763	0.545377	0.575621	0.301333	0.373969	0.413044
0.318407	0.699273	0.315154	0.575519	0.626924		0.588539		0.375749		0.295036		0.576629	0.71357	0.642315	0.534264	0.360646	0.490609
0.318518	0.700471	0.317314	0.576979	0.628207		0.588638		0.89259		0.507605		0.680219	0.742268	0.542935	0.437915	0.610195	0.34757
0.320147	0.70354	0.321335	0.578253	0.628373		0.589221		0.526173		0.263419		0.593608	0.571045	0.862903	0.489512	0.476519	0.360982
0.337746	0.7054	0.321356	0.580314	0.628456		0.590968		0.708869		0.57716		0.719694	0.440137	0.640857	0.574006	0.534687	0.512165
0.33809	0.705729	0.321578	0.583016	0.628578		0.591151		0.41987		0.824285		0.13907	0.654629	0.690151	0.244112	0.405594	0.636746
0.341184	0.708748	0.322917	0.584093	0.629362		0.593943		0.725819		0.360147		0.642702	0.371969	0.847623	0.179018	0.588586	0.765815
0.342872	0.711325	0.328657	0.58466	0.63008		0.596111		0.835869		0.876983		0.540838	0.292111	0.859609	0.302431	0.512308	0.503229
0.342934	0.711668	0.32981	0.586529	0.630129		0.596623		0.742979		0.604285		0.269756	0.624438	0.55373	0.568002	0.449997	0.0776614
0.34378	0.71265	0.332725	0.587506	0.632479		0.599231		0.72319		0.478757		0.279825	0.441799	0.758121	0.562296	0.320864	0.582912
0.34904	0.712924	0.332924	0.588005	0.634048		0.60019		0.781509		0.34608		0.638423	0.194513	0.719388	0.242571	0.406895	0.611905
0.349725	0.713408	0.335469	0.592963	0.635152		0.601639		0.897473		0.643491		0.755703	0.449161	0.846064	0.479222	0.870489	0.711884
0.350153	0.714901	0.33885	0.595763	0.637938		0.602565		0.303729		0.794929		0.506521	0.397471	0.56098	0.553497	0.356623	0.520402
0.353526	0.715179	0.339402	0.596811	0.639066		0.603432		0.38619		0.398025		0.25017	0.657281	0.463324	0.544542	0.463393	0.690054
0.358004	0.715349	0.339578	0.600715	0.643102		0.603627		0.473927		0.347744		0.346056	0.300136	0.318316	0.139897	0.5907	0.421813
0.370464	0.717053	0.339586	0.601063	0.643251		0.607639		0.82759		0.918036		0.42246	0.600838	0.472336	0.409187	0.608744	0.668429
0.378459	0.717546	0.339613	0.601403	0.643804		0.607771		0.951757		0.520023		0.787817	0.506473	0.576886	0.626756	0.51591	0.660995
0.383043	0.720066	0.342577	0.602424	0.64447		0.609103		0.601914		0.664063		0.753987	0.561496	0.570606	0.458814	0.576756	0.415711
0.384628	0.720091	0.343	0.60516	0.645115		0.609773		0.226408		0.181972		0.719509	0.758376	0.611242	0.647319	0.23491	0.571753
0.386938	0.720365	0.343306	0.607407	0.645861		0.609897		0.222651		0.679666		0.610815	0.40804	0.675744	0.308794	0.593243	0.612374
0.389143	0.721462	0.345759	0.60768	0.647978		0.611652		0.811836		0.784485		0.0872943	0.420686	0.598035	0.341928	0.258045	0.630969
0.395428	0.729458	0.348397	0.607931	0.648644		0.611898		0.331617		0.651693		0.750124	0.775906	0.810301	0.564671	0.806466	0.484363
0.400113	0.730369	0.348609	0.608744	0.648728		0.613083		0.756487		0.605294		0.806168	0.138124	0.621185	0.349719	0.474198	0.566303
0.40875	0.734386	0.349864	0.608763	0.650801		0.6135		0.624038		0.613045		0.394452	0.280231	0.683216	0.572129	0.485104	0.573367
0.413316	0.737362	0.353404	0.609228	0.651232		0.614422		0.888288		0.798183		0.468596	0.673035	0.204895	0.586042	0.814233	0.364437
0.413828	0.738188	0.355041	0.613687	0.651307		0.615127		0.710658		0.427683		0.703367	0.654906	0.139723	0.846011	0.634952	0.611942
0.423815	0.738935	0.357715	0.614805	0.652081		0.615228		0.534875		0.704574		0.592685	0.308402	0.606925	0.454104	0.617445	0.762057
0.42749	0.742174	0.357825	0.615489	0.656432		0.616903		0.821719		0.829863		0.449369	0.863209	0.77816	0.433337	0.231702	0.411581
0.430888	0.745483	0.358594	0.618167	0.656615		0.623171		0.740026		0.649505		0.404779	0.738566	0.83584	0.16488	0.522162	0.643589
0.431373	0.745553	0.360925	0.618601	0.657089		0.625003		0.605891		0.560303		0.325331	0.298259	0.840807	0.325143	0.611403	0.684585
0.432674	0.746057	0.360952	0.621657	0.657782		0.626132		0.521095		0.801383		0.767936	0.39223	0.544925	0.624189	0.209033	0.144676
0.43358	0.747469	0.362814	0.626341	0.658646		0.626501		0.656813		0.274605		0.610637	0.189212	0.72692	0.681932	0.475161	0.78297
0.436772	0.749003	0.366023	0.627418	0.659244		0.627196		0.626557		0.187147		0.581787	0.654996	0.716197	0.104577	0.322924	0.229778
0.438881	0.750015	0.367411	0.629604	0.66114		0.62759		0.850631		0.202728		0.676205	0.732879	0.645372	0.246689	0.628059	0.680992
0.440626	0.750157	0.367779	0.630043	0.661714		0.627686		0.663108		0.796662		0.359277	0.635138	0.797176	0.734747	0.573314	0.765307
0.442394	0.751992	0.367983	0.633648	0.662255		0.628344						0.124652	0.418767	0.738007	0.531333	0.246871	0.402821
0.444342	0.753624	0.372118	0.636258	0.665778		0.629952						0.387699	0.839456	0.496273	0.374307	0.504422	0.827992
0.449227	0.756667	0.373694	0.637436	0.666141		0.630897						0.627063	0.680517	0.56685	0.666189	0.658835	0.792391
0.450989	0.757478	0.374712	0.637565	0.671107		0.632532						0.679153	0.605919	0.807606	0.364064	0.690282	0.4258
0.459381	0.757681	0.378745	0.638865	0.672034		0.633915						0.231224	0.666007	0.819336	0.572211	0.513767	0.766027
0.461243	0.757722	0.380367	0.639279	0.67237		0.633951						0.391932	0.792864	0.510988	0.281788	0.572755	0.69822
0.461871	0.758151	0.381839	0.642172	0.672776		0.634576						0.35677	0.821283	0.470938	0.325925	0.580839	0.558073
0.462373	0.76009	0.381953	0.647314	0.674		0.634802						0.708927	0.476781	0.162906	0.593862	0.0548389	0.718997
0.467581	0.760415	0.382611	0.647556	0.675592		0.634885						0.558339	0.690666	0.475366	0.484979	0.679717	0.133189
0.47049	0.760614	0.383605	0.650473	0.682006		0.635095						0.517674	0.100222	0.687401	0.228409	0.635045	0.312
0.474724	0.761135	0.383632	0.655913	0.682235		0.635654						0.269528	0.637118	0.660975	0.296088	0.706311	0.789617
0.475044	0.761608	0.38421	0.656883	0.682715		0.636789						0.786425	0.4613	0.777037	0.282057	0.7284	0.710165
0.477731	0.764145	0.387249	0.658843	0.684537		0.637991						0.780218	0.542477	0.175889	0.728494	0.664126	0.718544
0.478445	0.764333	0.387612	0.659043	0.685226		0.638138						0.179266	0.578992	0.64115	0.762904	0.323048	0.656246
0.479495	0.765043	0.387937	0.659751	0.686223		0.638225						0.617869	0.366852	0.690411	0.548939	0.545461	0.0867616
0.479929	0.766059	0.389497	0.660168	0.687375		0.63944						0.541812	0.664741	0.608848	0.582986	0.237208	0.60766
0.482647	0.767364	0.389773	0.660577	0.690125		0.640151						0.699607	0.824176	0.732872	0.279526	0.656159	0.806559
0.483198	0.769218	0.394137	0.662475	0.690129		0.640705						0.217984	0.835195	0.494171	0.617924	0.645056	0.498766
0.483909	0.774331	0.394368	0.663706	0.691623		0.642339						0.540436	0.66138	0.540895	0.544133	0.839739	0.605372
0.484629	0.775417	0.39488	0.664346	0.692197		0.64738						0.603405	0.675567	0.322072	0.23024	0.696418	0.840282
0.487075	0.775689	0.395767	0.664491	0.6927		0.647603						0.596069	0.728703	0.420814	0.440794	0.665881	0.178356
0.488908	0.779159	0.401964	0.665295	0.694406		0.650042						0.325489	0.61636	0.560828	0.44268	0.468459	0.728368
0.493709	0.779443	0.403265	0.671587	0.695506		0.652904						0.804257	0.671297	0.54161	0.564804	0.505577	0.300172
0.498013	0.780698	0.404485	0.672809	0.696406		0.653434						0.472425	0.747935	0.604864	0.338129	0.563239	0.766171
0.499568	0.781904	0.405633	0.674633	0.69726		0.65529						0.661222	0.66477	0.607172	0.445551	0.781416	0.314981
0.500027	0.784749	0.40597	0.676518	0.69829		0.656782						0.68323	0.593813	0.621485	0.232165	0.463541	0.786468
0.50141	0.785072	0.406185	0.677225	0.698373		0.657134						0.634533	0.702956	0.858066	0.421354	0.69373	0.582435
0.505715	0.785781	0.406656	0.679029	0.698536		0.65921						0.798871	0.311263	0.662821	0.342053	0.676293	0.756551
0.50979	0.785999	0.406683	0.679137	0.699034		0.659348						0.802757	0.836435		0.651914	0.559349
0.510645	0.787199	0.406847	0.681419	0.699262		0.660045						0.686902	0.694371		0.726273	0.183089
0.511408	0.788375	0.40696	0.682121	0.699662		0.66058						0.723015	0.394633		0.695662	0.60191
0.511572	0.793329	0.408602	0.691048	0.700105		0.660851						0.896323	0.427025		0.617597	0.238732
0.512222	0.793922	0.410396	0.695215	0.700168		0.661343						0.307543	0.93294		0.415636	0.724497
0.515051	0.794884	0.413834	0.696323	0.701973		0.661454						0.472668	0.153632		0.596993	0.709088
0.515153	0.795621	0.415772	0.697356	0.706803		0.66398						0.661946	0.560278		0.5526	0.749329
0.517645	0.795859	0.415996	0.700117	0.710089		0.664766						0.842263	0.542018		0.269387	0.132951
0.518246	0.799125	0.417954	0.700781	0.71068		0.665571						0.758458	0.7272		0.27591	0.776991
0.51865	0.799132	0.4197	0.703288	0.711495		0.666138						0.260092	0.126123		0.464245	0.433873
0.522989	0.801846	0.420859	0.704988	0.717234		0.666868						0.6838	0.748548		0.531118	0.490098
0.524367	0.806697	0.421913	0.705143	0.7176		0.667041						0.476173	0.604679		0.13471	0.456444
0.525006	0.807181	0.422658	0.708625	0.718017		0.67361						0.489941	0.454784		0.743265	0.706697
0.525143	0.807689	0.422995	0.708904	0.718548		0.673677						0.657854	0.55953		0.374787	0.912896
0.527546	0.807711	0.423716	0.711836	0.72147		0.675503						0.318761	0.61524		0.422247	0.647059
0.529647	0.814605	0.423891	0.713112	0.723985		0.677272						0.631511	0.804542		0.2351	0.905547
0.530512	0.818484	0.426181	0.713341	0.725571		0.678605						0.691058	0.591619		0.158918	0.837205
0.53093	0.81927	0.427049	0.718429	0.725676		0.679335						0.311087	0.40177		0.605302	0.80904
0.532586	0.823607	0.427369	0.722426	0.726145		0.681141						0.440547	0.345237		0.581235	0.726118
0.53582	0.823885	0.427584	0.726434	0.726943		0.681431						0.693134	0.514096		0.538023	0.0680104
0.537099	0.826193	0.428057	0.726796	0.72872		0.681589						0.61394	0.66824		0.474667	0.300391
0.537198	0.826244	0.429589	0.72892	0.729226		0.681885						0.3419	0.594651		0.635752	0.577628
0.537775	0.826438	0.43059	0.728935	0.730064		0.682422						0.555949	0.482536		0.687451	0.703866
0.539238	0.826562	0.431133	0.734563	0.730291		0.684726						0.493706	0.553603		0.57303	0.415602
0.540697	0.833787	0.433233	0.7358	0.733371		0.68476						0.637012	0.776957		0.563485	0.844644
0.542532	0.834927	0.434103	0.738852	0.733405		0.685379						0.731831	0.496593		0.627268	0.138185
0.54361	0.835151	0.436333	0.741051	0.735171		0.688528						0.812744	0.922392		0.134772	0.290116
0.543926	0.835832	0.438453	0.741973	0.7362		0.688966						0.494765	0.663356		0.685674	0.658723
0.546703	0.836294	0.438952	0.742035	0.736359		0.691318						0.86798	0.783044		0.793735	0.382129
0.549297	0.838247	0.439501	0.743533	0.737932		0.693192						0.838075	0.677223		0.656021	0.237584
0.54963	0.841516	0.439669	0.750961	0.739436		0.694779						0.80414	0.74978		0.819158	0.401724
0.54964	0.841904	0.441036	0.760212	0.739843		0.695254						0.798944	0.65527		0.495367	0.335405
0.551076	0.844832	0.442104	0.768226	0.74051		0.695413						0.505988	0.464981		0.652735	0.678475
0.55312	0.848876	0.442547	0.777303	0.741211		0.695654						0.758567	0.475522		0.742472	0.641685
0.554296	0.850842	0.442765	0.785774	0.741619		0.695829						0.803359	0.709824		0.595934	0.543136
0.554843	0.855624	0.444936	0.786045	0.74204		0.696329						0.550388	0.679947		0.665168	0.741095
0.555583	0.860991	0.445323	0.786931	0.742178		0.700575						0.646805	0.820213		0.610022	0.43994
0.55575	0.861115	0.445625	0.791248	0.742826		0.702577						0.698901	0.134253		0.641154	0.133359
0.55693	0.864161	0.446994	0.791473	0.742961		0.702892						0.812362	0.406606		0.767993	0.589701
0.559684	0.865914	0.44779	0.799154	0.743852		0.704164						0.382288	0.342829		0.526586	0.601282
0.560308	0.867404	0.449481	0.81073	0.744547		0.704627						0.68278	0.773044		0.757295	0.383574
0.560837	0.867534	0.450264	0.814302	0.745782		0.705345						0.623013	0.602097		0.770343	0.306677
0.561313	0.868597	0.450837	0.83152	0.747136		0.707503						0.812684	0.627262		0.652956	0.664866
0.563953	0.872318	0.451376	0.833426	0.747331		0.70935						0.819219	0.674418		0.687437	0.59046
0.564172	0.872771	0.456142	0.833738	0.747422		0.710878						0.643663	0.883677		0.497601	0.807176
0.567828	0.875528	0.456295	0.836704	0.749653		0.711702						0.314116	0.156034		0.669935	0.581981
0.568839	0.886784	0.456439	0.839058	0.749668		0.711963						0.527955	0.77045		0.575984	0.728658
0.570198	0.887712	0.456949	0.84128	0.75252		0.712828						0.561396	0.719607		0.435156	0.761866
0.572085	0.903766	0.4574	0.854473	0.752698		0.713217						0.875623	0.868473		0.522486	0.753753
0.573284	0.904383	0.457876	0.867409	0.752742		0.713275						0.34617	0.157707		0.546379	0.526074
0.573397	0.909852	0.4585	0.872564	0.753301		0.713431						0.434627	0.470464		0.415062	0.214994
0.573668	0.911363	0.459484	0.88096	0.753815		0.717791						0.519995	0.29216		0.474271	0.58431
0.576356	0.913398	0.459549	0.901053	0.754051		0.717861						0.657333	0.682743		0.518781	0.511208
0.577252	0.932355	0.460375	0.920388	0.755422		0.721887						0.832487	0.516258		0.794023	0.486936
0.582315		0.460851		0.755966		0.722615						0.0907693	0.364459		0.224612	0.569448
0.582381		0.463107		0.756292		0.722671						0.758846	0.525793		0.132615	0.55356
0.585394		0.464107		0.757075		0.724678						0.789518	0.934424		0.407736	0.841065
0.585854		0.464669		0.759298		0.724809						0.51624	0.436081		0.828791	0.658786
0.588347		0.465627		0.760921		0.725856						0.399136	0.751969		0.232805	0.614819
0.589486		0.465848		0.761184		0.725918						0.506656	0.860259		0.436193	0.590058
0.59004		0.466959		0.761711		0.726493						0.742837	0.827238		0.52125	0.518269
0.590199		0.467274		0.762001		0.726496						0.755966	0.658362		0.579421	0.694397
0.59098		0.468071		0.763328		0.726822						0.54804	0.565908		0.713594	0.378446
0.591444		0.468146		0.764331		0.727332						0.547425	0.291285		0.538947	0.2011
0.594945		0.468197		0.767482		0.728199						0.70176	0.857435		0.567631	0.890648
0.595674		0.469317		0.768514		0.728247						0.428054	0.828789		0.355761	0.608077
0.596672		0.46989		0.768618		0.730051						0.431377	0.548809		0.51937	0.771983
0.599718		0.471199		0.768763		0.731284						0.777152	0.842781		0.398191	0.797883
0.601115		0.471476		0.77181		0.73644						0.456119	0.789895		0.56332	0.566183
0.602478		0.472604		0.772851		0.736572						0.201231	0.593354		0.486296	0.53719
0.602498		0.472976		0.774063		0.737471						0.826537	0.540759		0.454135	0.435204
0.602994		0.47325		0.775032		0.739298						0.907771	0.0728191		0.682739	0.509467
0.604078		0.473374		0.775191		0.739421						0.929479	0.934017		0.631913	0.857304
0.607309		0.475704		0.778416		0.739522						0.478601	0.845026		0.459717	0.717464
0.611627		0.476068		0.780402		0.739575						0.672194	0.852548		0.438242	0.501249
0.612033		0.476184		0.783625		0.7406						0.714006	0.607789		0.792729	0.62258
0.614057		0.477038		0.784074		0.740624						0.121541	0.696917		0.0779722	0.72215
0.614931		0.477508		0.784489		0.741072						0.516958	0.735706		0.54974	0.681871
0.615428		0.477585		0.787478		0.741239						0.590161	0.305825		0.637473	0.879327
0.615622		0.479474		0.790495		0.741542						0.377456	0.685362		0.169801	0.813501
0.616166		0.479524		0.791142		0.741805						0.654093	0.876511		0.528528	0.411324
0.616445		0.480344		0.791193		0.742418						0.551002	0.754114		0.509476	0.512953
0.617363		0.481265		0.791596		0.746262						0.658525	0.855657		0.702296	0.857505
0.618385		0.4818		0.791982		0.746919						0.661962	0.407237		0.328948	0.410949
0.619536		0.483337		0.792131		0.748394						0.727939	0.761259		0.481506	0.586323
0.61981		0.484085		0.792801		0.749969						0.162995	0.631227		0.60295	0.747318
0.620364		0.484145		0.800852		0.752924						0.7155	0.814708		0.465252	0.631948
0.620534		0.485036		0.801214		0.755799						0.872029	0.683537		0.660343	0.47331
0.62143		0.485901		0.80129		0.757258						0.81722	0.800043		0.41067	0.809484
0.621547		0.486582		0.802157		0.758269						0.573661	0.782006		0.694793	0.0702837
0.623587		0.487517		0.803111		0.759175						0.579703	0.619949		0.47395	0.672369
0.624179		0.489479		0.806458		0.762896						0.66783	0.833754		0.57089	0.369295
0.625611		0.490999		0.808062		0.765482						0.325037	0.802195		0.346489	0.795468
0.62662		0.492472		0.80852		0.766074						0.474864	0.787208		0.361793	0.628681
0.626713		0.493061		0.808831		0.766376						0.2545	0.18217		0.55162	0.60337
0.628766		0.494927		0.808846		0.767599						0.461123	0.894114		0.771509	0.642262
0.629934		0.496117		0.808965		0.767902						0.636101	0.681608		0.440127	0.728959
0.63017		0.496693		0.80938		0.769968						0.754317	0.753441		0.402133	0.727429
0.63108		0.49701		0.811478		0.771305						0.774043	0.531428		0.533641	0.782218
0.633752		0.498719		0.811976		0.773828						0.262239	0.361804		0.149035	0.784
0.63446		0.499334		0.81479		0.774023						0.547432	0.304834		0.68142	0.151772
0.634797		0.500147		0.815892		0.774468						0.642647	0.21667		0.377209	0.203685
0.634882		0.500952		0.823859		0.779976						0.743442	0.733839		0.255923	0.188849
0.63632		0.501184		0.828611		0.780116						0.716173	0.530722		0.700665	0.912701
0.636484		0.501337		0.828886		0.785647						0.532998	0.857854		0.491294	0.22514
0.636605		0.501797		0.833941		0.78583						0.275188	0.599944		0.750105	0.41201
0.638235		0.502134		0.834061		0.788063						0.706422	0.865803		0.418142	0.6189
0.638798		0.502576		0.836273		0.789943						0.501145	0.574378		0.419908	0.535062
0.640616		0.502956		0.838426		0.796955						0.283743	0.896175		0.395164	0.450484
0.640666		0.503243		0.838565		0.797914						0.320211	0.853712		0.267916	0.787427
0.640937		0.505375		0.84219		0.799906						0.305124	0.75023		0.200012	0.706708
0.642124		0.506878		0.844891		0.804842						0.450194	0.664771		0.434633	0.697059
0.643129		0.507547		0.850283		0.808376						0.410188	0.727476		0.54783	0.807428
0.643132		0.508427		0.853549		0.814312						0.655465	0.131529		0.338798	0.790731
0.643203		0.50884		0.853735		0.819355						0.501154	0.693527		0.595097	0.76516
0.645528		0.510441		0.854666		0.821947						0.723511	0.487079		0.413391	0.402569
0.64606		0.511666		0.863847		0.824775						0.442191	0.832893		0.225471	0.367772
0.646274		0.511993		0.868447		0.825531						0.361022	0.530186		0.40546	0.573339
0.646455		0.51223		0.86899		0.826938						0.66103	0.716667		0.524768	0.726731
0.650613		0.512232		0.870494		0.830405						0.686468	0.669736		0.730601	0.359033
0.652665		0.51302		0.871215		0.831732						0.517481	0.122455		0.548354	0.813086
0.654782		0.513225		0.871954		0.832503						0.576203	0.569075		0.519608	0.597221
0.65668		0.514807		0.873728		0.840265						0.52165	0.522596		0.766183	0.71271
0.65954		0.514902		0.87563		0.840332						0.0435522	0.810848		0.514378	0.678569
0.6626		0.515406		0.880287		0.840535						0.623533	0.177677		0.13062	0.459102
0.663147		0.515588		0.885838		0.84908						0.781845	0.716038		0.620258	0.640858
0.665426		0.516782		0.892697		0.852702						0.718663	0.756678		0.669118	0.863269
0.666534		0.518844		0.896424		0.854852						0.706798	0.755948		0.761285	0.252817
0.668068		0.520088		0.896931		0.858442						0.523933	0.484903		0.109981	0.325077
0.669557		0.52159		0.910456		0.859175						0.521177	0.691583		0.551297	0.223575
0.670577		0.52209		0.912897		0.859735						0.625485	0.608071		0.0636629	0.698278
0.671516		0.522473		0.920227		0.86279						0.516831	0.665017		0.420737	0.712228
0.671908		0.522497		0.925261		0.865143						0.727873	0.73118		0.465386	0.597998
0.672427		0.523316		0.925548		0.881979						0.830585	0.729488		0.208505	0.645427
0.67337		0.524796		0.925669		0.900343						0.0804262	0.744737		0.747664	0.653273
0.67365		0.525763		0.92618		0.912228						0.586044	0.723945		0.479261	0.376479
0.673763		0.527925		0.939074		0.915687						0.697552	0.503777		0.726486	0.44759
0.674034		0.529608		0.953723		0.943129						0.673111	0.653849		0.337256	0.524527
0.674097		0.529907										0.189053	0.835682		0.694797	0.280833
0.674384		0.529994										0.67842	0.7656		0.360969	0.777683
0.675738		0.531221										0.791776	0.614151		0.689051	0.565386
0.676792		0.531524										0.390504	0.543438		0.377908	0.527833
0.678937		0.536225										0.761685	0.846781		0.544956	0.102112
0.679285		0.541435										0.870463	0.405874		0.215148	0.808556
0.679347		0.54197										0.234227	0.692948		0.575605	0.613117
0.679944		0.542644										0.581784	0.608768		0.486586	0.678051
0.680381		0.542699										0.527868	0.700771		0.396808	0.177279
0.680401		0.54279										0.501321	0.528103		0.868674	0.161047
0.680814		0.54631										0.330757	0.916048		0.704565	0.844387
0.682124		0.551214										0.496382	0.79162		0.544949	0.793501
0.683298		0.552295										0.788129	0.884319		0.669923	0.634337
0.683539		0.553667										0.161443	0.570036		0.327785	0.714514
0.684041		0.554222										0.603575	0.733181		0.350196	0.759713
0.684166		0.554784										0.606441	0.52664		0.554962	0.438848
0.684322		0.555036										0.535584	0.65391		0.796904	0.713612
0.68664		0.555894										0.594114	0.826775		0.815882	0.590315
0.687917		0.5566										0.515436	0.656169		0.605496	0.799866
0.688435		0.557012										0.741702	0.355859		0.500399	0.523118
0.689949		0.557356										0.786762	0.919356		0.482745	0.85637
0.69008		0.560803										0.37753	0.660743		0.497154	0.749393
0.690993		0.561415										0.575513	0.637111		0.193478	0.790127
0.693854		0.561579										0.683137	0.777022		0.559101	0.667351
0.695273		0.562193										0.514805	0.612722		0.454267	0.74826
0.698157		0.562602										0.620687	0.497662		0.544241	0.544734
0.703836		0.564234										0.145219	0.68702		0.596392	0.628391
0.704577		0.564509										0.501452	0.738665		0.316249	0.215119
0.705606		0.566045										0.901939	0.836495		0.521479	0.68976
0.7065		0.567598										0.827497	0.410127		0.658938	0.647064
0.707126		0.568012										0.673545	0.328652		0.643257	0.384847
0.707863		0.568572										0.266322	0.846495		0.613151	0.330725
0.708153		0.568657										0.427708	0.388308		0.522206	0.498494
0.709097		0.570807										0.405523	0.621369		0.430036	0.579592
0.709546		0.570932										0.560556	0.909489		0.160897	0.863316
0.710024		0.571315										0.422812	0.554052		0.592981	0.741579
0.710433		0.571591										0.374423	0.742009		0.782719	0.507912
0.710678		0.572012										0.695627	0.6886		0.596266	0.656729
0.711753		0.573125										0.213262	0.616513		0.126053	0.561884
0.711875		0.574125										0.192036	0.640694		0.489397	0.795962
0.713828		0.578288										0.466072	0.437396		0.486398	0.596623
0.713918		0.578645										0.527777	0.618537		0.270496	0.541332
0.715463		0.57997										0.459107	0.628191		0.0980693	0.778794
0.716411		0.583756										0.434574	0.623635		0.418646	0.542626
0.71687		0.586723										0.773121	0.691289		0.338271	0.836737
0.716872		0.586863										0.479713	0.598165		0.419322	0.668137
0.717891		0.587797										0.694253	0.231414		0.377369	0.601795
0.718247		0.588202										0.688832	0.669428		0.432323	0.189089
0.718561		0.588599										0.251288	0.899128		0.328836	0.750512
0.718936		0.589554										0.336844	0.670676		0.650704	0.878825
0.71894		0.589677										0.390199	0.784496		0.640128	0.263471
0.719177		0.594429										0.518106	0.630951		0.22946	0.695686
0.719422		0.595667										0.73564	0.311173		0.464721	0.785261
0.719497		0.596173										0.461542	0.497211		0.152596	0.418433
0.720691		0.596378										0.711928	0.777712		0.648194	0.754863
0.721187		0.596495										0.582684	0.450981		0.233969	0.430882
0.721812		0.597402										0.533867	0.735821		0.815405	0.809333
0.722041		0.598026										0.837807	0.639435		0.598886	0.750639
0.723467		0.598724										0.718303	0.566447		0.191761	0.548274
0.724896		0.600194										0.468963	0.902347		0.488414	0.739825
0.726558		0.600448										0.787837	0.715858		0.510974	0.526957
0.726712		0.6026										0.647953	0.881956		0.299657	0.562946
0.727018		0.602993										0.534025	0.612388		0.370848	0.621348
0.727952		0.603214										0.355254	0.268499		0.417753	0.389309
0.731551		0.605033										0.744069	0.777269		0.558477	0.55879
0.732028		0.605386										0.356284	0.615752		0.478704	0.15025
0.732515		0.606457										0.59958	0.652658		0.263413	0.516389
0.732525		0.606811										0.449035	0.700588		0.693892	0.380864
0.733035		0.608077										0.877189	0.423831		0.47713	0.528605
0.733199		0.609063										0.700135	0.596072		0.375626	0.440693
0.734187		0.609282										0.38037	0.620568		0.345814	0.445611
0.734871		0.610034										0.325387	0.923843		0.667034	0.144879
0.739077		0.613788										0.143376	0.762239		0.147529	0.869901
0.73984		0.614085										0.534699	0.809669		0.443473	0.644983
0.740835		0.614929										0.257207	0.799184		0.243441	0.411582
0.742271		0.615286										0.817961	0.163438		0.61948	0.688135
0.743181		0.615837										0.726556	0.603438		0.205228	0.755592
0.744076		0.616607										0.956688	0.592278		0.669452	0.534936
0.745311		0.617407										0.337904	0.802465		0.535642	0.709987
0.745437		0.617961										0.833047	0.671109		0.78361	0.870753
0.745589		0.618204										0.880283	0.846295		0.0450946	0.528896
0.746322		0.618967										0.285214	0.385015		0.377043	0.729063
0.747316		0.619346										0.734767	0.431436		0.724935	0.318325
0.747682		0.620858										0.874505	0.571706		0.45167	0.26749
0.750332		0.62235										0.805985	0.75022		0.484674	0.553518
0.750406		0.624754										0.666895	0.625568		0.642488	0.604276
0.752004		0.6249										0.735611	0.659779		0.203404	0.387575
0.753862		0.624971										0.666167	0.504953		0.240982	0.673614
0.754631		0.625875										0.599605	0.842324		0.620673	0.780159
0.756915		0.628468										0.630486	0.763283		0.753553	0.827069
0.758794		0.628553										0.897208	0.57916		0.732893	0.563677
0.759156		0.630494										0.565523	0.369546		0.451071	0.62776
0.763464		0.632181										0.65271	0.765623		0.512817	0.499406
0.765096		0.636172										0.764488	0.309447		0.535428	0.521581
0.766292		0.636177										0.428015	0.732063		0.801539	0.667577
0.767693		0.6381										0.809335	0.52098		0.664667	0.605942
0.768043		0.640007										0.476582	0.518133		0.777213	0.779477
0.769861		0.641541										0.844052	0.684834		0.846638	0.493272
0.770875		0.644298										0.899169	0.725499		0.238835	0.571526
0.770968		0.644551										0.493709	0.71307		0.802231	0.662565
0.77156		0.645493										0.638627	0.697683		0.757974	0.293705
0.771682		0.647075										0.581376	0.380363		0.629231	0.360934
0.772955		0.647195										0.87615	0.72882		0.551347	0.790259
0.77351		0.650703										0.651152	0.730857		0.761755	0.183847
0.774248		0.651109										0.84971	0.869069		0.647898	0.546003
0.77553		0.651175										0.194815	0.321317		0.406942	0.865663
0.775845		0.65208										0.741744	0.943525		0.57392	0.563372
0.775872		0.654899										0.564522	0.760134		0.695759	0.745194
0.777366		0.655142										0.515324	0.805588		0.378927	0.453774
0.779146		0.655199										0.764529	0.245851		0.472313	0.156638
0.780002		0.655866										0.340522	0.827871		0.732604	0.673464
0.780766		0.655937										0.517665	0.624899		0.347937	0.533281
0.78191		0.656255										0.703403	0.676322		0.768117	0.659365
0.781918		0.657759										0.177403	0.53974		0.713297	0.791583
0.783205		0.65955										0.653425	0.430385		0.430119	0.81954
0.783526		0.660849										0.706539	0.521489		0.703199	0.549346
0.784143		0.662046										0.895676	0.302322		0.498095	0.363782
0.784267		0.662837										0.736064	0.299088		0.695081	0.850319
0.785234		0.663838										0.651497	0.829423		0.683919	0.732438
0.786194		0.664323										0.468439	0.668474		0.85824	0.466678
0.786914		0.66598										0.882391	0.633397		0.736511	0.553293
0.787812		0.667265										0.803635	0.603263		0.867022	0.700807
0.787912		0.670414										0.638774	0.85555		0.466953	0.610348
0.790076		0.671256										0.131298	0.827093		0.413305	0.450186
0.792417		0.672244										0.667752	0.176923		0.652073	0.542828
0.793439		0.672635										0.471509	0.480792		0.622947	0.603423
0.794657		0.673008										0.870691	0.698152		0.650427	0.778653
0.798149		0.674216										0.828497	0.697958		0.826456	0.501814
0.798445		0.67582										0.659942	0.5727		0.846874	0.0619597
0.798529		0.676957										0.706963	0.86225		0.648345	0.769559
0.799566		0.67811										0.650699	0.606069		0.620815	0.312971
0.799718		0.678897										0.132567	0.542006		0.67333	0.699839
0.801406		0.679199										0.849749	0.857481		0.799991	0.772495
0.801888		0.68525										0.631434	0.295465		0.319623	0.60572
0.804616		0.685316										0.501437	0.734141		0.657129	0.634301
0.805437		0.685409										0.669	0.427467		0.668014	0.678675
0.80559		0.686215										0.661091	0.602505		0.839662	0.759233
0.806958		0.687438										0.914841	0.56066		0.758634	0.64111
0.807954		0.690125										0.528831	0.658791		0.681669	0.662857
0.808773		0.690558										0.774179	0.752929		0.337698	0.807453
0.80936		0.690676										0.466069	0.506429		0.52995	0.282102
0.809773		0.69237										0.253058	0.288624		0.494001	0.353179
0.809973		0.693458										0.690123	0.557464		0.568866	0.780409
0.810088		0.693629										0.601029	0.620618		0.0820252	0.497698
0.810493		0.695133										0.634632	0.506553		0.830589	0.631006
0.810668		0.696811										0.803396	0.498031		0.68933	0.14477
0.812374		0.701492										0.586991	0.76621		0.770367	0.446031
0.813281		0.702467										0.12224	0.697023		0.574048	0.674332
0.81445		0.704237										0.774678	0.856945		0.543691	0.12438
0.814595		0.706004										0.781513	0.154515		0.698916	0.449807
0.814811		0.706343										0.87554	0.726729		0.643691	0.341356
0.816127		0.708567										0.833544	0.782581		0.636904	0.425738
0.818761		0.709644										0.807929	0.604387		0.56123	0.569819
0.81887		0.712329										0.442603	0.540696		0.76852	0.636891
0.818969		0.712379										0.675743	0.528095		0.234745	0.57162
0.822446		0.716748										0.187885	0.650885		0.842426	0.424787
0.823934		0.716834										0.75536	0.684743		0.776506	0.082576
0.82488		0.717012										0.748433	0.400953		0.609069	0.765666
0.827263		0.719411										0.559893	0.766084		0.165533	0.692162
0.835817		0.721996										0.696826	0.423409		0.809092	0.104577
0.836121		0.722676										0.422424	0.752362		0.469182	0.441376
0.836395		0.723931										0.807658	0.126184		0.529784	0.650514
0.837073		0.728256										0.877206	0.66065		0.820402	0.455399
0.838056		0.73371										0.674357	0.265632		0.707682	0.285762
0.83949		0.735714										0.710056	0.38368		0.523217	0.438784
0.84091		0.737239										0.769342	0.548787		0.821338	0.241285
0.842178		0.737662										0.686056	0.894066		0.802176	0.821859
0.845278		0.738192										0.858737	0.372487		0.565893	0.372779
0.84624		0.742825										0.630172	0.83291		0.331192	0.815883
0.846507		0.743843										0.787636	0.601727		0.783159	0.577671
0.849476		0.754758										0.779762	0.469689		0.607384	0.780111
0.850179		0.757562										0.256138	0.556075		0.137895	0.436716
0.850805		0.760342										0.946771	0.623651		0.75552	0.518914
0.852487		0.761										0.815293	0.115942		0.615494	0.264677
0.857407		0.761138										0.626734	0.793764		0.500938	0.774782
0.857575		0.764129										0.531571	0.635772		0.509478	0.325471
0.859574		0.764933										0.305257	0.732036		0.757238	0.231662
0.862464		0.770214										0.747774	0.67205		0.712286	0.491963
0.866509		0.773867										0.649108	0.298952		0.425737	0.535601
0.869086		0.775369										0.673968	0.817959		0.320052	0.477665
0.869328		0.776028										0.80889	0.399434		0.700558	0.696754
0.876765		0.776222										0.806927	0.700391		0.709866	0.357731
0.876827		0.77659										0.608268	0.821426		0.649304	0.38853
0.877227		0.776806										0.273207	0.565921		0.824717	0.497037
0.878426		0.783845										0.601731	0.362041		0.677907	0.714727
0.879199		0.786312										0.835514	0.526334		0.846243	0.477693
0.880084		0.788923										0.716871	0.335533		0.598031	0.680001
0.8845		0.800415										0.835691	0.647888		0.302562	0.335931
0.885223		0.801473										0.781	0.736946		0.652465	0.421529
0.894475		0.803305										0.52041	0.271899		0.660317	0.526858
0.894821		0.822849										0.477644	0.78755		0.426018	0.63993
0.898395		0.824815										0.397188	0.235558		0.624187	0.122901
0.901551		0.833703										0.43238	0.355711		0.437268	0.121706
0.912073		0.835912										0.315203	0.156038		0.369685	0.418472
0.912484		0.840966										0.705143	0.537574		0.73134	0.474865
0.91516		0.853103										0.632595	0.598764		0.601101	0.280579
0.915458		0.854756										0.816471	0.578499		0.797827	0.472067
0.917031		0.856357										0.809884	0.267249		0.290735	0.804732
0.919142		0.858942										0.291832	0.464759		0.290146	0.51382
0.921668		0.859725										0.697216	0.542743		0.52907	0.822473
0.924352		0.866813										0.565643	0.507214		0.248875	0.517683
0.928092		0.872476										0.55904	0.604861		0.393603	0.277261
0.9328		0.899155										0.641795	0.843316		0.550205	0.646362
0.93297		0.91318										0.816769	0.764568		0.478143	0.356674
0.940661		0.921049										0.898704	0.361476		0.786181	0.830201
0.965732		0.977028										0.229222	0.589971		0.297172	0.578312
												0.689073	0.714115		0.604758	0.357157
												0.494366	0.580145		0.522687	0.552661
												0.443773	0.753853		0.589818	0.739846
												0.673915	0.817226		0.620633	0.524309
												0.658539	0.909335		0.858053	0.598257
												0.293087	0.494051		0.107392	0.727076
												0.181484	0.811134		0.791366	0.160725
												0.786684	0.511589		0.491023	0.15495
												0.637608	0.782594		0.808504	0.505624
												0.424053	0.772985		0.418176	0.759923
												0.626368	0.786978		0.56957	0.338012
												0.626289	0.7792		0.492559	0.665241
												0.462926	0.629052		0.674333	0.74564
												0.771502	0.789981		0.871538	0.378933
												0.658874	0.715067		0.318999	0.416615
												0.790163	0.495237		0.867578	0.837005
												0.348004	0.868899		0.442953	0.845431
												0.83651	0.748103		0.617713	0.381159
												0.465477	0.909323		0.11807	0.8135
												0.789607	0.685469		0.705583	0.86093
												0.734363	0.889521		0.705415	0.841489
												0.597033	0.541748		0.625757	0.591372
												0.865194	0.373794		0.613402	0.586653
												0.892816	0.436541		0.561305	0.435152
												0.866418	0.529794		0.307572	0.779851
												0.736525	0.532186		0.614463	0.63261
												0.703894	0.813505		0.583724	0.590522
												0.906644	0.564792		0.61964	0.79954
												0.692473	0.663973		0.259184	0.536687
												0.773378	0.744464		0.403606	0.0911073
												0.650344	0.669621		0.356035	0.552244
												0.428547	0.568683		0.113433	0.231267
												0.547146	0.831022		0.740327	0.0817722
												0.943128	0.478602		0.265538	0.185036
												0.754866	0.519459		0.805654	0.801138
												0.590772	0.486898		0.3218	0.662197
												0.774002	0.446539		0.521852	0.66928
												0.684421	0.530031		0.452431	0.607884
												0.537287	0.85142		0.407007	0.357848
												0.747117	0.707122		0.348898	0.685849
												0.519207	0.149552		0.710356	0.802937
												0.627196	0.554475		0.562869	0.766955
												0.596825	0.506048		0.544417	0.242794
												0.714723	0.59978		0.164991	0.778351
												0.509994	0.844886		0.516461	0.639641
												0.58447	0.634898		0.773145	0.779955
												0.55229	0.528847		0.51753	0.77037
												0.387702	0.534699		0.467633	0.149903
												0.826655	0.711476		0.63949	0.797553
												0.550104	0.736633		0.443557	0.587822
												0.777205	0.560713		0.479493	0.684708
												0.623153	0.690723		0.789023	0.486506
												0.731458	0.0747373		0.462899	0.365849
												0.258452	0.346445		0.327297	0.474337
												0.098508	0.708567		0.503778	0.323328
												0.37231	0.521378		0.64466	0.541298
												0.389575	0.326116		0.291306	0.297946
												0.739888	0.286847		0.689793	0.687597
												0.585837	0.686307		0.704082	0.663984
												0.677692	0.555609		0.567341	0.208582
												0.560679	0.698355		0.780382	0.391767
												0.411554	0.253591		0.799854	0.734231
												0.776741	0.638271		0.617952	0.576909
												0.254301	0.398631		0.437856	0.498988
												0.645233	0.860281		0.807458	0.429496
												0.531932	0.55012		0.308983	0.56626
												0.751635	0.778277		0.814262	0.742502
												0.251473	0.739653		0.452066	0.61997
												0.576604	0.51358		0.531811	0.327272
												0.376898	0.642629		0.282369	0.139153
												0.523718	0.720066		0.856138	0.653894
												0.64372	0.46199		0.384972	0.463956
												0.324865	0.835151		0.674039	0.571111
												0.739841	0.764145		0.330475	0.636097
												0.604411	0.7054		0.354576	0.50869
												0.903492	0.45218		0.877413	0.673295
												0.567445	0.855624		0.393623	0.703768
												0.697715	0.650936		0.693129	0.757519
												0.735304	0.688418		0.697209	0.56851
												0.491632	0.641885		0.533014	0.768742
												0.324428	0.479153		0.443915	0.80393
												0.789558	0.758151		0.534042	0.563372
												0.775089	0.887712		0.598989	0.459949
												0.619941	0.638199		0.624384	0.611489
												0.253061	0.116096		0.637685	0.86104
												0.814233	0.839106		0.471775	0.221154
												0.495827	0.304092		0.539108	0.519404
												0.893016	0.480154		0.163876	0.85693
												0.172503	0.530129		0.383967	0.736669
												0.609565	0.278666		0.519351	0.8384
												0.647334	0.501992		0.849513	0.787943
												0.575929	0.621707		0.613169	0.610574
												0.619976	0.813689		0.561132	0.720547
												0.35839	0.536571		0.134573	0.749794
												0.609193	0.848901		0.607008	0.380076
												0.870772	0.648393		0.418527	0.223388
												0.374273	0.686762		0.452281	0.789584
												0.63127	0.785781		0.353917	0.701805
												0.713516	0.860991		0.768542	0.813356
												0.663207	0.280221		0.784361	0.651009
												0.650754	0.822401		0.666127	0.735296
												0.495765	0.686067		0.214563	0.680797
												0.131486	0.461693		0.475212	0.353259
												0.627167	0.489691		0.595484	0.759861
												0.39144	0.710531		0.788523	0.549988
												0.731992	0.687295		0.765164	0.601589
												0.52609	0.807689		0.719063	0.880479
												0.309805	0.319998		0.38511	0.760327
												0.590287	0.667215		0.359819	0.821231
												0.847124	0.794884		0.198373	0.170835
												0.699078	0.431093		0.391257	0.382741
												0.304655	0.395846		0.377481	0.459702
												0.612955	0.552072		0.629947	0.447299
												0.736471	0.607415		0.416983	0.846018
												0.0804338	0.777908		0.719349	0.620545
												0.491245	0.393341		0.416209	0.777173
												0.597653	0.660577		0.24587	0.715447
												0.680126	0.589513		0.431572	0.715418
												0.559864	0.569992		0.435981	0.518726
												0.32171	0.657702		0.73185	0.608682
												0.746965	0.711325		0.648513	0.528434
												0.434809	0.867404		0.332874	0.275356
												0.873474	0.556316		0.669604	0.589561
												0.680549	0.586111		0.752039	0.935354
												0.588018	0.670592		0.41469	0.77946
												0.870599	0.738267		0.702981	0.494553
												0.857835	0.756667		0.600819	0.485418
												0.498656	0.717053		0.704505	0.620778
												0.701979	0.788375		0.595881	0.854729
												0.589307	0.903766		0.637699	0.285232
												0.606084	0.748723		0.661073	0.446471
												0.71703	0.457192		0.659461	0.437595
												0.33001	0.791572		0.784377	0.780567
												0.647887	0.702471		0.542789	0.606844
												0.673076	0.750015		0.316116	0.821186
												0.699253	0.729458		0.626136	0.696005
												0.826345	0.746057		0.567738	0.619751
												0.823329	0.682737		0.628977	0.214796
												0.467527	0.821306		0.137844	0.691644
												0.567952	0.801545		0.536318	0.952442
												0.455339	0.537559		0.578356	0.655998
												0.479709	0.757868		0.418524	0.528296
												0.390714	0.695029		0.62105	0.777575
												0.567316	0.584306		0.450496	0.551165
												0.152612	0.773832		0.449877	0.663687
												0.674126	0.434971		0.356815	0.899788
												0.693911	0.681302		0.150824	0.630766
												0.785444	0.674191		0.628802	0.339754
												0.622612	0.767364		0.259561	0.393506
												0.76098	0.175448		0.607145	0.357739
												0.511194	0.609167		0.726821	0.587378
												0.650321	0.676908		0.656976	0.17231
												0.813195	0.766059		0.595779	0.634159
												0.690457	0.81927		0.299117	0.664747
												0.79197	0.628166		0.754159	0.343837
												0.680339	0.262874		0.432476	0.803825
												0.819343	0.696402		0.136659	0.660649
												0.591607	0.779159		0.387734	0.718262
												0.671748	0.713408		0.823773	0.709128
												0.430939	0.715179		0.474967	0.79295
												0.581897	0.791688		0.489048	0.372264
												0.396937	0.783315		0.732385	0.375847
												0.712749	0.795859		0.606409	0.639078
												0.760064	0.686138		0.444748	0.751863
												0.595406	0.8516		0.702383	0.663281
												0.482665	0.792282		0.663016	0.663362
												0.729289	0.750157		0.642188	0.674604
												0.768164	0.484103		0.797599	0.465114
												0.739378	0.435024		0.403959	0.803419
												0.253781	0.774331		0.332952	0.835405
												0.125277	0.579125		0.533108	0.615223
												0.281943	0.522475		0.474929	0.682887
												0.648103	0.628033		0.318739	0.797003
												0.707148	0.672891		0.691567	0.423063
												0.707457	0.904338		0.61845	0.682034
												0.834884	0.620006		0.746752	0.674323
												0.545864	0.757478		0.324431	0.77037
												0.693074	0.478459		0.69897	0.447227
												0.623651	0.632711		0.361049	0.77174
												0.833258	0.805812		0.842679	0.582801
												0.780806	0.787199		0.722824	0.74827
												0.712222	0.652019		0.147717	0.735763
												0.661062	0.550916		0.618074	0.579829
												0.440514	0.629349		0.365142	0.79432
												0.824897	0.806697		0.617825	0.515878
												0.479309	0.643758		0.535923	0.607597
												0.714541	0.826438		0.554378	0.608343
												0.433357	0.438188		0.404234	0.554522
												0.429363	0.533876		0.60645	0.333395
												0.685249	0.708284		0.363693	0.655932
												0.321445	0.139614		0.626131	0.692062
												0.622855	0.799125		0.669901	0.664459
												0.696738	0.513717		0.680169	0.786373
												0.268521	0.512433		0.520484	0.183944
												0.529674	0.886254		0.750799	0.307899
												0.304008	0.768458		0.667387	0.478901
												0.512375	0.583751		0.456197	0.499589
												0.806882	0.757681		0.314595	0.396023
												0.596143	0.657401		0.487325	0.757079
												0.263884	0.668534		0.742861	0.55077
												0.330503	0.642194		0.354018	0.573474
												0.657832	0.742174		0.714971	0.0915123
												0.568485	0.749003		0.548373	0.775835
												0.523204	0.861115		0.665554	0.673299
												0.506692	0.216987		0.536924	0.662723
												0.263222	0.80989		0.517156	0.617271
												0.858814	0.690196		0.547104	0.721958
												0.282296	0.251531		0.292917	0.66013
												0.177679	0.737362		0.185248	0.605737
												0.597124	0.785072		0.790446	0.405597
												0.670783	0.658522		0.75626	0.601591
												0.530663	0.146962		0.472712	0.80164
												0.357247	0.597227		0.368403	0.584176
												0.793702	0.745553		0.285568	0.848937
												0.669192	0.371422		0.315809	0.688599
												0.640193	0.730369		0.750444	0.474135
												0.720419	0.738188		0.679002	0.691524
												0.0862204	0.612628		0.484159	0.590032
												0.793276	0.886784		0.262913	0.809586
												0.297144	0.660668		0.1674	0.8589
												0.815563	0.670903		0.738991	0.356047
												0.544811	0.627491		0.149246	0.318481
												0.893012	0.711668		0.583073	0.794169
												0.671684	0.751992		0.842163	0.528324
												0.639699	0.868597		0.227428	0.585808
												0.689777	0.720091		0.758576	0.380606
												0.714669	0.631588		0.561395	0.628243
												0.78833	0.3763		0.489289	0.559829
												0.598165	0.670648		0.477015	0.444647
												0.81385	0.560253		0.7621	0.245713
												0.890605	0.841516		0.717884	0.190746
												0.824533	0.71265		0.587896	0.650216
												0.88344	0.319919		0.690048	0.754974
												0.784519	0.238625		0.654644	0.717851
												0.755422	0.885305		0.766652	0.568018
												0.785875	0.599404		0.867709	0.467752
												0.711266	0.54261		0.736206	0.709284
												0.652119	0.833787		0.675768	0.163534
												0.74676	0.43258		0.784461	0.772509
												0.54828	0.638937		0.553103	0.555795
												0.803309	0.793329		0.501293	0.52578
												0.649231	0.348666		0.28422	0.467364
												0.461167	0.591929		0.126183	0.784638
												0.389281	0.867534		0.785485	0.531404
												0.853847	0.689992		0.56866	0.604699
												0.691177	0.715349		0.610098	0.793104
												0.664783	0.673304		0.214826	0.532959
												0.731945	0.777918		0.136613	0.666981
												0.667626	0.130025		0.333003	0.677618
												0.760671	0.605806		0.803758	0.120481
												0.713134	0.412724		0.401354	0.793275
												0.893118	0.761608		0.0954605	0.411718
												0.779224	0.784749		0.623867	0.476784
												0.542822	0.708748		0.210045	0.745751
												0.574121	0.693697		0.401078	0.629558
												0.564217	0.721462		0.883972	0.678998
												0.613313	0.508913		0.677847	0.468508
												0.663796	0.747469		0.32523	0.689814
												0.578209	0.657586		0.593348	0.203679
												0.687784	0.699273		0.242273	0.496703
												0.475735	0.785999		0.150025	0.615676
												0.0981606	0.562319		0.536614	0.820715
												0.556781	0.864161		0.64045	0.900788
												0.751434	0.355215		0.717402	0.528777
												0.536197	0.77519		0.581419	0.439351
												0.476469	0.76443		0.476426	0.790844
												0.599407	0.865914		0.707131	0.263002
												0.239496	0.592347		0.245188	0.692787
												0.732791	0.688303		0.570193	0.454741
												0.653989	0.500989		0.786176	0.585367
												0.781121	0.905693		0.50309	0.665999
												0.430659	0.490904		0.396049	0.678702
												0.559218	0.799132		0.267121	0.558859
												0.605652	0.672698		0.74883	0.733198
												0.820901	0.775689		0.754193	0.718094
												0.591412	0.807711		0.122451	0.87665
												0.605754	0.818484		0.405863	0.358862
												0.463019	0.850842		0.474027	0.582661
												0.642787	0.738935		0.727584	0.841059
												0.912484	0.761135		0.163759	0.882313
												0.559521	0.41548		0.582858	0.604843
												0.792763	0.486298		0.469923	0.799288
												0.33277	0.584682		0.505862	0.812059
												0.612681	0.59484		0.153526	0.308326
												0.71111	0.673743		0.716536	0.836133
												0.744487	0.499005		0.753531	0.545001
												0.664887	0.765043		0.774464	0.740722
												0.562159	0.826562		0.799544	0.379498
												0.247408	0.838247		0.274075	0.590979
												0.67728	0.70354		0.88957	0.257799
												0.636661	0.611022		0.503041	0.593903
												0.59694	0.826244		0.585345	0.88305
												0.722351	0.76009		0.548231	0.742434
												0.6468	0.872771		0.774713	0.739069
												0.775398	0.454077		0.70919	0.654214
												0.0478332	0.59177		0.617084	0.933718
												0.615329	0.681976		0.520868	0.71881
												0.849271	0.527349		0.553168	0.696094
												0.585786	0.612694		0.714146	0.685634
												0.829628	0.51345		0.565956	0.184054
												0.488151	0.523969		0.592034	0.475262
												0.833555	0.760614		0.729605	0.33222
												0.890214	0.357519		0.763546	0.531204
												0.504418	0.372996		0.81345	0.361683
												0.80272	0.448982		0.676058	0.49828
												0.856428	0.136635		0.857591	0.313051
												0.522988	0.400675		0.786534	0.610396
												0.263507	0.419617		0.834683	0.647352
												0.290014	0.626752		0.677735	0.676412
												0.241326	0.529873		0.57731	0.210313
												0.679082	0.652794		0.711315	0.466393
												0.147674	0.202522		0.661042	0.80619
												0.7008	0.437007		0.184042	0.704984
												0.890071	0.502111		0.743523	0.507612
												0.83549	0.534387		0.630193	0.778575
												0.67173	0.54808		0.469665	0.473149
												0.319091	0.801846		0.79047	0.624257
												0.685418	0.58091		0.648792	0.747363
												0.59166	0.775417		0.741927	0.659419
												0.291265	0.435151		0.106537	0.431393
												0.194891	0.604913		0.545259	0.747981
												0.622731	0.581671		0.615705	0.268946
												0.0751053	0.188021		0.788571	0.194975
												0.697662	0.764333		0.71047	0.398293
												0.818469	0.515398		0.814549	0.808273
												0.939357	0.408978		0.653239	0.702208
												0.717156	0.601569		0.557131	0.640197
												0.709406	0.484851		0.230903	0.468036
												0.822908	0.913398		0.356414	0.644263
												0.689575	0.595366		0.244885	0.202219
												0.552092	0.536883		0.513429	0.42001
												0.665204	0.544058		0.461493	0.208011
												0.944917	0.781904		0.498477	0.671709
												0.618608	0.604368		0.718904	0.604644
												0.815905	0.581234		0.607189	0.513783
												0.535129	0.547446		0.318411	0.527617
												0.505443	0.110971		0.496677	0.15076
												0.36115	0.384618		0.172365	0.145818
												0.722269	0.814605		0.602215	0.293928
												0.576102	0.541373		0.793746	0.681692
												0.518627	0.753624		0.727922	0.487876
												0.548485	0.483314		0.51328	0.52041
												0.770318	0.714901		0.703347	0.591868
												0.529259	0.694219		0.51696	0.556978
												0.313764	0.823885		0.685873	0.697401
												0.605842	0.571312		0.84823	0.301919
												0.856281	0.610888		0.738867	0.610962
												0.806293	0.744189		0.168975	0.353244
												0.488564	0.654891		0.836858	0.45354
												0.755413	0.460782		0.760627	0.576865
												0.706303	0.332		0.721521	0.561906
												0.746681	0.483699		0.478355	0.651822
												0.553297	0.460143		0.711491	0.383637
												0.580019	0.128749		0.761046	0.830633
												0.36703	0.575652		0.443997	0.693154
												0.885844	0.610763		0.679371	0.595236
												0.485216	0.864922		0.538777	0.886807
												0.490404	0.753299		0.689792	0.716912
												0.502466	0.654107		0.367278	0.552129
												0.863793	0.579988		0.394872	0.783417
												0.536273	0.592054		0.387078	0.742039
												0.860744	0.633671		0.232622	0.487226
												0.683216	0.74678		0.671659	0.463211
												0.846084	0.772778		0.310189	0.473674
												0.797574	0.261632		0.433508	0.721623
												0.588578	0.420466		0.773599	0.472478
												0.966572	0.493753		0.550726	0.685801
												0.54138	0.911363		0.199535	0.848609
												0.853186	0.398944		0.502785	0.608439
												0.515605	0.487551		0.519208	0.684913
												0.841747	0.826193		0.679859	0.634343
												0.354354	0.37746		0.595727	0.562226
												0.843708	0.616667		0.622287	0.600408
												0.332349	0.687943		0.464786	0.780739
												0.854221	0.872318		0.364904	0.340966
												0.778676	0.836294		0.434767	0.472257
												0.758009	0.745483		0.600269	0.525005
												0.922228	0.631483		0.124849	0.632718
												0.608774			0.71381
												0.675851			0.672857
												0.759711			0.23466
												0.83216			0.474438
												0.772776			0.630742
												0.199943			0.569804
												0.553644			0.850287
												0.337614			0.1624
												0.530605			0.484309
												0.673304			0.439376
												0.851803			0.891566
												0.723353			0.357264
												0.872955			0.757471
												0.732278			0.621544
												0.709331			0.0761354
												0.683892			0.870479
												0.881284			0.701438
												0.799399			0.467091
												0.437901			0.455392
												0.516066			0.497278
												0.74278			0.546514
												0.695107			0.856486
												0.366251			0.708548
												0.724323			0.837504
												0.895993			0.621496
												0.656425			0.578215
												0.331228			0.561387
												0.761243			0.718437
												0.819011			0.593757
												0.733647			0.102193
												0.819507			0.688197
												0.946537			0.27425
												0.769773			0.835702
												0.870256			0.657297
												0.630308			0.521054
												0.23095			0.66745
												0.54278			0.846052
												0.723731			0.429494
												0.629757			0.503396
												0.225088			0.782448
												0.890624			0.907335
												0.911487			0.210569
												0.144678			0.249222
												0.225848			0.629554
												0.67407			0.324015
												0.734477			0.687308
												0.837053			0.311354
												0.86482			0.253753
												0.25604			0.60403
												0.885436			0.621205
												0.78029			0.125457
												0.788416			0.765264
												0.41987			0.646057
												0.725819			0.30304
												0.835869			0.608848
												0.742979			0.10338
												0.897473			0.579893
												0.303729			0.765199
												0.82759			0.695822
												0.951757			0.304993
												0.601914			0.488334
												0.226408			0.628587
												0.331617			0.56706
												0.756487			0.727022
												0.379097			0.262171
												0.315926			0.245008
												0.901529			0.213692
												0.814342			0.411222
												0.573997			0.511915
												0.654911			0.149171
												0.746747			0.614694
												0.782383			0.530436
												0.349235			0.442386
												0.545567			0.629895
												0.932281			0.797409
												0.768366			0.350564
												0.821719			0.645971
												0.740026			0.642602
												0.656813			0.188526
												0.626557			0.403399
												0.495025			0.644905
												0.543727			0.674563
												0.540697			0.578697
												0.487075			0.692728
												0.799566			0.163129
												0.734187			0.340249
												0.643132			0.727339
												0.734871			0.64681
												0.342934			0.674494
												0.63017			0.580737
												0.841615			0.719657
												0.781716			0.399475
												0.640937			0.475653
												0.917031			0.56497
												0.61981			0.34425
												0.400113			0.721138
												0.459381			0.620073
												0.413316			0.594094
												0.780002			0.698518
												0.482647			0.0869869
												0.808773			0.363623
												0.590199			0.369752
												0.719177			0.710413
												0.522989			0.776616
												0.616166			0.809302
												0.674034			0.279155
												0.638099			0.218384
												0.66355			0.296434
												0.573284			0.579453
												0.876765			0.287517
												0.663493			0.695976
												0.601806			0.0956161
												0.51865			0.67036
												0.320147			0.383208
												0.792417			0.463518
												0.517645			0.757881
												0.156386			0.674878
												0.731429			0.73291
												0.55441			0.654454
												0.584471			0.630999
												0.671516			0.74746
												0.40875			0.502621
												0.857407			0.716646
												0.81887			0.627917
												0.771682			0.821145
												0.836395			0.786743
												0.222528			0.682293
												0.34378			0.168908
												0.878426			0.654037
												0.279445			0.0888781
												0.537099			0.594429
												0.54964			0.511661
												0.731123			0.554171
												0.38782			0.247524
												0.69008			0.659442
												0.59004			0.148316
												0.806249			0.615714
												0.607708			0.299255
												0.486029			0.683635
												0.625129			0.382697
												0.302589			0.497673
												0.493709			0.804083
												0.76248			0.754328
												0.620642			0.119258
												0.229026			0.621193
												0.662157			0.201474
												0.617363			0.665079
												0.813281			0.657136
												0.838056			0.774511
												0.845278			0.892081
												0.640666			0.397077
												0.739077			0.617562
												0.628766			0.235071
												0.732525			0.343204
												0.810493			0.676562
												0.611627			0.617805
												0.532586			0.731634
												0.245866			0.30793
												0.885223			0.528075
												0.554843			0.868098
												0.805437			0.553317
												0.595674			0.188495
												0.894821			0.626393
												0.823934			0.742472
												0.732969			0.695207
												0.275605			0.367506
												0.654782			0.154096
												0.740835			0.425629
												0.751916			0.328434
												0.434854			0.802632
												0.8845			0.818108
												0.779146			0.770422
												0.683298			0.72978
												0.577252			0.773389
												0.711875			0.711919
												0.524367			0.35718
												0.342872			0.868204
												0.921668			0.72675
												0.290144			0.68964
												0.725848			0.792369
												0.554296			0.542436
												0.280023			0.419734
												0.709546			0.197193
												0.539238			0.551914
												0.915879			0.794195
												0.641724			0.258222
												0.670577			0.83755
												0.810668			0.654545
												0.515051			0.58498
												0.511572			0.779004
												0.215568			0.647813
												0.675738			0.49576
												0.736251			0.6273
												0.852204			0.619233
												0.672954			0.743271
												0.746248			0.791789
												0.359554			0.464418
												0.726881			0.375075
												0.721812			0.658443
												0.715463			0.602451
												0.65954			0.698877
												0.67337			0.572014
												0.783205			0.468806
												0.23933			0.358123
												0.703836			0.784324
												0.620534			0.80302
												0.774248			0.566338
												0.179126			0.35989
												0.607309			0.639823
												0.754631			0.454264
												0.646455			0.41722
												0.716872			0.78352
												0.566555			0.603063
												0.61356			0.687376
												0.413828			0.168717
												0.769861			0.544482
												0.780766			0.77542
												0.518246			0.463064
												0.799718			0.859089
												0.812374			0.834305
												0.680814			0.694708
												0.679944			0.236691
												0.786194			0.584455
												0.219941			0.742146
												0.629934			0.599422
												0.727952			0.604411
												0.84091			0.334138
												0.604078			0.289646
												0.613796			0.369524
												0.95216			0.684705
												0.619309			0.704185
												0.710281			0.333553
												0.529647			0.436236
												0.818761			0.627494
												0.478445			0.670238
												0.67365			0.493079
												0.461871			0.639839
												0.432674			0.549377
												0.727018			0.537828
												0.71687			0.537848
												0.680381			0.662841
												0.499568			0.102082
												0.780153			0.389229
												0.364549			0.487749
												0.595815			0.160728
												0.572654			0.64287
												0.768842			0.71572
												0.625726			0.854966
												0.783526			0.635323
												0.688435			0.802683
												0.798445			0.748879
												0.596672			0.705189
												0.718561			0.718847
												0.733035			0.59791
												0.867605			0.446478
												0.332892			0.45016
												0.618861			0.105763
												0.554841			0.61936
												0.615622			0.791826
												0.440626			0.715135
												0.719497			0.451519
												0.462373			0.663814
												0.669557			0.659694
												0.150958			0.60337
												0.527546			0.24049
												0.589486			0.69589
												0.498013			0.637297
												0.573668			0.765997
												0.729801			0.683039
												0.863622			0.436188
												0.82488			0.581166
												0.602478			0.518267
												0.498401			0.219784
												0.258998			0.813095
												0.753862			0.856645
												0.63632			0.803937
												0.941704			0.711231
												0.902958			0.90561
												0.775872			0.764214
												0.710433			0.607845
												0.965732			0.808702
												0.378459			0.833292
												0.818969			0.782798
												0.318407			0.755944
												0.873044			0.690497
												0.895956			0.603961
												0.680401			0.58909
												0.894475			0.687766
												0.825086			0.148383
												0.312248			0.649155
												0.770875			0.566931
												0.267134			0.299947
												0.588347			0.756135
												0.601115			0.800055
												0.10411			0.478456
												0.55312			0.646768
												0.634941			0.609554
												0.504566			0.525882
												0.612033			0.610716
												0.869328			0.378504
												0.53582			0.544578
												0.479495			0.700165
												0.576356			0.446143
												0.559684			0.515439
												0.475843			0.551191
												0.750801			0.790982
												0.731551			0.706573
												0.804616			0.706327
												0.350153			0.563202
												0.33809			0.47703
												0.679347			0.653581
												0.626713			0.558268
												0.716411			0.90711
												0.707863			0.120251
												0.62143			0.604941
												0.238161			0.479259
												0.436772			0.50476
												0.173909			0.301931
												0.59098			0.789958
												0.814811			0.469498
												0.563953			0.800105
												0.602994			0.32612
												0.665426			0.714193
												0.389143			0.253756
												0.762489			0.710755
												0.737373			0.754134
												0.826997			0.379829
												0.855343			0.719242
												0.77351			0.763009
												0.640616			0.455571
												0.585854			0.702366
												0.474724			0.798581
												0.713828			0.206232
												0.157688			0.669573
												0.337746			0.831408
												0.73984			0.533762
												0.786508			0.410408
												0.378802			0.499761
												0.479929			0.417304
												0.723467			0.16376
												0.842178			0.696411
												0.449227			0.84083
												0.467581			0.745277
												0.671908			0.579851
												0.788056			0.647226
												0.260778			0.664015
												0.47049			0.557029
												0.746322			0.721574
												0.742271			0.3218
												0.866509			0.79707
												0.530512			0.631961
												0.752004			0.721583
												0.764691			0.717248
												0.731422			0.420878
												0.770968			0.726354
												0.835817			0.191891
												0.787812			0.788221
												0.625611			0.705136
												0.560837			0.762986
												0.560308			0.191879
												0.650613			0.65973
												0.775845			0.317959
												0.772317			0.436368
												0.337726			0.527119
												0.615428			0.289339
												0.652665			0.710207
												0.808019			0.736541
												0.757031			0.807104
												0.484629			0.478603
												0.0860246			0.126179
												0.589723			0.328937
												0.60428			0.614708
												0.616445			0.467533
												0.621547			0.544004
												0.614057			0.454002
												0.383043			0.811503
												0.745589			0.269263
												0.809773			0.628877
												0.849476			0.594499
												0.928092			0.472819
												0.721187			0.114779
												0.722041			0.721012
												0.591444			0.434191
												0.63108			0.425187
												0.444342			0.695715
												0.113843			0.569128
												0.750332			0.532193
												0.227121			0.427402
												0.585394			0.621244
												0.546703			0.63218
												0.80936			0.706207
												0.744076			0.192616
												0.537775			0.672863
												0.63446			0.732049
												0.349725			0.538202
												0.759156			0.705582
												0.892979			0.437518
												0.45212			0.55869
												0.442394			0.615277
												0.53093			0.457157
												0.62662			0.683602
												0.243404			0.704457
												0.11302			0.74317
												0.564172			0.749214
												0.769284			0.798041
												0.310204			0.503126
												0.128283			0.30625
												0.876827			0.570619
												0.830996			0.621186
												0.747367			0.651088
												0.820105			0.690499
												0.819001			0.432699
												0.879199			0.422341
												0.112423			0.456952
												0.512222			0.70623
												0.689949			0.59092
												0.816127			0.27308
												0.672427			0.0594653
												0.912073			0.435571
												0.807954			0.734975
												0.787912			0.681064
												0.726558			0.208675
												0.827263			0.525154
												0.570198			0.54763
												0.850179			0.632127
												0.525143			0.835344
												0.83949			0.376041
												0.78191			0.334293
												0.707126			0.49173
												0.732028			0.589088
												0.846507			0.721203
												0.798529			0.735993
												0.896929			0.841758
												0.53015			0.288142
												0.358004			0.629364
												0.163823			0.520081
												0.877227			0.638851
												0.65668			0.365145
												0.511408			0.321406
												0.719422			0.384514
												0.552245			0.589389
												0.270465			0.397041
												0.708153			0.695206
												0.256629			0.427266
												0.836121			0.187355
												0.537198			0.693884
												0.69227			0.577456
												0.706097			0.63055
												0.531788			0.403795
												0.683338			0.252102
												0.330435			0.722888
												0.853649			0.545289
												0.885023			0.836271
												0.772274			0.69665
												0.690993			0.483601
												0.572085			0.764913
												0.743181			0.653426
												0.713918			0.61582
												0.634797			0.575967
												0.674384			0.610376
												0.318518			0.707451
												0.438881			0.757157
												0.698157			0.63322
												0.901551			0.694199
												0.50924			0.450051
												0.469977			0.466782
												0.745311			0.694667
												0.705606			0.659269
												0.295222			0.692847
												0.93297			0.564916
												0.119302			0.659775
												0.782353			0.717848
												0.7065			0.712178
												0.924352			0.71388
												0.646274			0.497326
												0.84624			0.483403
												0.880084			0.535092
												0.55575			0.925473
												0.81445			0.760624
												0.500027			0.777393
												0.678937			0.578332
												0.682124			0.504607
												0.645528			0.609158
												0.859574			0.756197
												0.814595			0.369414
												0.619536			0.20605
												0.364327			0.78138
												0.475039			0.720457
												0.483909			0.409042
												0.42749			0.782201
												0.77553			0.477753
												0.50979			0.772779
												0.735319			0.527637
												0.349215			0.690144
												0.631441			0.658945
												0.154388			0.533278
												0.555583			0.733539
												0.431373			0.339994
												0.55269			0.372527
												0.234528			0.563709
												0.64606			0.643086
												0.483198			0.558066
												0.784143			0.776141
												0.55693			0.703499
												0.683539			0.664724
												0.684166			0.865282
												0.912484			0.675889
												0.542532			0.0894499
												0.857575			0.602748
												0.663147			0.515717
												0.852487			0.731556
												0.693854			0.597525
												0.9328			0.0658103
												0.488908			0.600643
												0.634882			0.684847
												0.43358			0.566515
												0.624179			0.800873
												0.278545			0.46314
												0.877371			0.65036
												0.760292			0.798482
												0.199632			0.56122
												0.148133			0.777089
												0.594945			0.529223
												0.710678			0.747934
												0.288321			0.218545
												0.636079			0.426001
												0.20446			0.591603
												0.710042			0.638154
												0.778811			0.514268
												0.585215			0.5494
												0.638798			0.652449
												0.6626			0.217236
												0.636605			0.668648
												0.636484			0.813832
												0.620364			0.218569
												0.940661			0.624329
												0.524061			0.505545
												0.64767			0.0899364
												0.549297			0.691829
												0.711753			0.361247
												0.56676			0.229474
												0.47417			0.178431
												0.479093			0.43989
												0.113671			0.410715
												0.836652			0.755071
												0.630164			0.783074
												0.801888			0.580196
												0.684041			0.216608
												0.654315			0.569221
												0.274559			0.68619
												0.616472			0.745904
												0.0828137			0.227106
												0.718936			0.467134
												0.573397			0.524133
												0.704577			0.6772
												0.160103			0.298395
												0.477731			0.769272
												0.430888			0.714213
												0.54963			0.608052
												0.666534			0.503862
												0.21686			0.481522
												0.568839			0.47481
												0.822446			0.834023
												0.370464			0.815161
												0.384628			0.408583
												0.146008			0.893596
												0.91516			0.584499
												0.717891			0.747445
												0.618385			0.52054
												0.726712			0.680377
												0.80559			0.720629
												0.765096			0.651533
												0.505715			0.533617
												0.777366			0.546841
												0.705289			0.510662
												0.784977			0.353879
												0.772955			0.0696972
												0.0871216			0.64693
												0.623587			0.70059
												0.687917			0.70794
												0.279844			0.696397
												0.633752			0.756017
												0.877782			0.797094
												0.0820756			0.786375
												0.34904			0.755727
												0.14976			0.57769
												0.676792			0.71102
												0.386938			0.717066
												0.790076			0.397929
												0.673763			0.467001
												0.718247			0.811947
												0.515153			0.621787
												0.799645			0.801071
												0.858216			0.0837259
