# Supplementary material for: 4q-D4Z4 chromatin architecture regulates the transcription of muscle atrophic genes in facioscapulohumeral muscular dystrophy
Source: HighWire-hosted journal article supplement (doi:10.1101/gr.233288.117), 2019-05-16
Supplement: Supplemental_Table_S4_JD.xlsx [file Supplemental_Table_S4_JD.xlsx]

## Sheet: legend
Supplemental Table S4. Chromatin state switches and RNA-seq expression levels
Sheet 1	Chromatin state switches between CN and FSHD myoblasts (MB)
Sheet 2	Chromatin state switches between CN and FSHD myotubes (MT)
Sheet 3	Expression levels of activated genes in MB
Sheet 4	Expression levels of repressed genes in MB
Sheet 5	Expression levels of activated genes in MT
Sheet 6	Expression levels of repressed genes in MT

## Sheet: Chrom state switches MB
Chromatin state switches in MB
CN					FSHD1
Chr	Start	End	Chrom state	Gene Symbol	Chr	Start	End	Chrom state	Gene Symbol
chr1	738532	739137	5_Tx	AL669831.1	chr1	738532	739137	6_TxWk	AL669831.1
chr1	860260	861800	12_TssBiv	SAMD11	chr1	860260	861400	2_TssFlnk	SAMD11
chr1	870400	870800	13_ReprPC	SAMD11	chr1	870400	871000	11_EnhWk	SAMD11
chr1	878600	879200	6_TxWk	SAMD11	chr1	878400	879000	11_EnhWk	SAMD11
chr1	879200	879955	5_Tx	SAMD11	chr1	879000	879955	7_EnhG1	SAMD11
chr1	901877	902200	4_TssFlnkD	PLEKHN1	chr1	901877	902200	3_TssFlnkU	PLEKHN1
chr1	902200	903000	2_TssFlnk	PLEKHN1	chr1	902200	902800	4_TssFlnkD	PLEKHN1
chr1	910200	911245	13_ReprPC	PERM1	chr1	910579	911600	14_ReprPCWk	C1orf170
chr1	910579	912000	13_ReprPC	PERM1	chr1	910579	911600	14_ReprPCWk	C1orf170
chr1	949000	949800	2_TssFlnk	ISG15	chr1	949000	949800	4_TssFlnkD	ISG15
chr1	949800	949920	6_TxWk	ISG15	chr1	949800	949920	11_EnhWk	ISG15
chr1	955503	956600	2_TssFlnk	AGRN	chr1	955600	956800	12_TssBiv	AGRN
chr1	976200	976400	11_EnhWk	AGRN	chr1	976200	976400	2_TssFlnk	AGRN
chr1	1138888	1141200	14_ReprPCWk	TNFRSF18	chr1	1138888	1141400	13_ReprPC	TNFRSF18
chr1	1141200	1142071	13_ReprPC	TNFRSF18	chr1	1141400	1142071	12_TssBiv	TNFRSF18
chr1	1167629	1168400	2_TssFlnk	B3GALT6	chr1	1167800	1168400	3_TssFlnkU	B3GALT6
chr1	1168400	1169200	8_EnhG2	B3GALT6	chr1	1168400	1169200	7_EnhG1	B3GALT6
chr1	1199600	1200400	9_EnhA1	UBE2J2	chr1	1199400	1200200	7_EnhG1	UBE2J2
chr1	1200400	1200800	3_TssFlnkU	UBE2J2	chr1	1200200	1200800	9_EnhA1	UBE2J2
chr1	1207600	1208200	3_TssFlnkU	UBE2J2	chr1	1207800	1208200	4_TssFlnkD	UBE2J2
chr1	1223600	1227409	6_TxWk	SCNN1D	chr1	1223200	1226400	14_ReprPCWk	SCNN1D
chr1	1239800	1241400	4_TssFlnkD	ACAP3	chr1	1240000	1242000	3_TssFlnkU	ACAP3
chr1	1259000	1259200	4_TssFlnkD	INTS11	chr1	1259000	1259200	8_EnhG2	CPSF3L
chr1	1280400	1282400	4_TssFlnkD	DVL1	chr1	1280400	1283400	3_TssFlnkU	DVL1
chr1	1288069	1290600	5_Tx	MXRA8	chr1	1288069	1290400	7_EnhG1	MXRA8
chr1	1336400	1337000	7_EnhG1	MRPL20-AS1	chr1	1336600	1337200	5_Tx	RP4-758J18.2
chr1	1448200	1449200	2_TssFlnk	ATAD3A	chr1	1448600	1449400	8_EnhG2	ATAD3A
chr1	1501400	1502200	6_TxWk	SSU72	chr1	1501200	1502000	7_EnhG1	SSU72
chr1	1502800	1503600	9_EnhA1	SSU72	chr1	1502800	1504000	7_EnhG1	SSU72
chr1	1508200	1508800	6_TxWk	SSU72	chr1	1508400	1508800	7_EnhG1	SSU72
chr1	1563800	1564600	5_Tx	MIB2	chr1	1564000	1564600	6_TxWk	MIB2
chr1	1589400	1589800	2_TssFlnk	CDK11B	chr1	1589400	1589800	4_TssFlnkD	CDK11B
chr1	1593400	1594000	11_EnhWk	SLC35E2B	chr1	1593200	1594000	9_EnhA1	SLC35E2B
chr1	1594000	1594400	6_TxWk	SLC35E2B	chr1	1594000	1594400	11_EnhWk	SLC35E2B
chr1	1617400	1618400	10_EnhA2	SLC35E2B	chr1	1617400	1618400	9_EnhA1	SLC35E2B
chr1	1618400	1620000	6_TxWk	SLC35E2B	chr1	1618400	1620400	7_EnhG1	SLC35E2B
chr1	1622800	1623200	2_TssFlnk	SLC35E2B	chr1	1622800	1623400	4_TssFlnkD	SLC35E2B
chr1	1654400	1654800	11_EnhWk	CDK11A	chr1	1654200	1654800	7_EnhG1	CDK11A
chr1	1657600	1658600	5_Tx	SLC35E2A	chr1	1657200	1658200	6_TxWk	SLC35E2
chr1	1672400	1674000	6_TxWk	SLC35E2A	chr1	1671800	1673400	7_EnhG1	SLC35E2
chr1	1707800	1708400	6_TxWk	NADK	chr1	1707600	1708600	11_EnhWk	NADK
chr1	1710200	1710600	2_TssFlnk	NADK	chr1	1710200	1710600	4_TssFlnkD	NADK
chr1	1758400	1759200	7_EnhG1	GNB1	chr1	1758400	1759400	11_EnhWk	GNB1
chr1	1771200	1773400	6_TxWk	GNB1	chr1	1771200	1774200	11_EnhWk	GNB1
chr1	1774400	1775200	5_Tx	GNB1	chr1	1774400	1775600	7_EnhG1	GNB1
chr1	1789000	1789600	6_TxWk	GNB1	chr1	1788800	1789400	7_EnhG1	GNB1
chr1	1790000	1791200	3_TssFlnkU	GNB1	chr1	1789800	1791000	9_EnhA1	GNB1
chr1	1808000	1811800	5_Tx	GNB1	chr1	1807800	1810400	7_EnhG1	GNB1
chr1	1820000	1821000	2_TssFlnk	GNB1	chr1	1820000	1820600	4_TssFlnkD	GNB1
chr1	1846266	1848735	14_ReprPCWk	CALML6	chr1	1846266	1848200	13_ReprPC	CALML6
chr1	1957000	1957400	4_TssFlnkD	GABRD	chr1	1957000	1957600	12_TssBiv	GABRD
chr1	2064200	2064600	1_TssA	PRKCZ	chr1	2064000	2064600	3_TssFlnkU	PRKCZ
chr1	2065400	2066600	14_ReprPCWk	PRKCZ	chr1	2065400	2066800	6_TxWk	PRKCZ
chr1	2122200	2123179	6_TxWk	AL590822.2	chr1	2122200	2123179	7_EnhG1	AL590822.2
chr1	2122200	2123400	6_TxWk	AL590822.2	chr1	2122200	2123179	7_EnhG1	AL590822.2
chr1	2124800	2125200	8_EnhG2	FAAP20	chr1	2124800	2125200	7_EnhG1	C1orf86
chr1	2130000	2130400	11_EnhWk	FAAP20	chr1	2130000	2130400	9_EnhA1	C1orf86
chr1	2130400	2130600	6_TxWk	FAAP20	chr1	2130400	2130600	3_TssFlnkU	C1orf86
chr1	2131200	2131600	2_TssFlnk	FAAP20	chr1	2131200	2131600	4_TssFlnkD	C1orf86
chr1	2131600	2135600	15_NA	FAAP20	chr1	2132600	2135200	6_TxWk	C1orf86
chr1	2137400	2138400	6_TxWk	FAAP20	chr1	2137400	2138200	11_EnhWk	C1orf86
chr1	2164400	2165000	2_TssFlnk	SKI	chr1	2164400	2165000	4_TssFlnkD	SKI
chr1	2168200	2174400	5_Tx	SKI	chr1	2167000	2175200	7_EnhG1	SKI
chr1	2178600	2180000	11_EnhWk	SKI	chr1	2178400	2180000	7_EnhG1	SKI
chr1	2186800	2188400	9_EnhA1	SKI	chr1	2186200	2187800	7_EnhG1	SKI
chr1	2220200	2221200	6_TxWk	SKI	chr1	2220200	2221200	11_EnhWk	SKI
chr1	2222800	2223400	4_TssFlnkD	SKI	chr1	2222400	2223400	3_TssFlnkU	SKI
chr1	2223400	2224000	11_EnhWk	SKI	chr1	2223400	2223800	9_EnhA1	SKI
chr1	2228200	2230200	5_Tx	SKI	chr1	2229000	2230200	6_TxWk	SKI
chr1	2253600	2254400	10_EnhA2	MORN1	chr1	2253600	2254200	11_EnhWk	MORN1
chr1	2262400	2262800	11_EnhWk	MORN1	chr1	2262400	2262800	12_TssBiv	MORN1
chr1	2262800	2267000	6_TxWk	MORN1	chr1	2263000	2266600	14_ReprPCWk	MORN1
chr1	2321800	2322200	11_EnhWk	MORN1	chr1	2321800	2322400	4_TssFlnkD	MORN1
chr1	2322200	2323146	2_TssFlnk	MORN1	chr1	2322400	2323146	1_TssA	MORN1
chr1	2324000	2324600	2_TssFlnk	RER1	chr1	2324000	2324600	4_TssFlnkD	RER1
chr1	2343000	2343600	2_TssFlnk	PEX10	chr1	2343000	2343400	4_TssFlnkD	PEX10
chr1	2454800	2456400	6_TxWk	PANK4	chr1	2455000	2456200	11_EnhWk	PANK4
chr1	2456400	2457200	2_TssFlnk	PANK4	chr1	2456200	2457000	4_TssFlnkD	PANK4
chr1	2487078	2487400	14_ReprPCWk	TNFRSF14	chr1	2487078	2487400	11_EnhWk	TNFRSF14
chr1	2518800	2519400	2_TssFlnk	PRXL2B	chr1	2518600	2519400	4_TssFlnkD	FAM213B
chr1	2567415	2570800	14_ReprPCWk	TTC34	chr1	2568400	2571000	13_ReprPC	TTC34
chr1	2570800	2573600	15_NA	TTC34	chr1	2571000	2573000	6_TxWk	TTC34
chr1	2573600	2574000	2_TssFlnk	TTC34	chr1	2573400	2574000	4_TssFlnkD	TTC34
chr1	3087800	3088000	2_TssFlnk	PRDM16	chr1	3087800	3088000	14_ReprPCWk	PRDM16
chr1	3088000	3091000	6_TxWk	PRDM16	chr1	3088800	3091400	14_ReprPCWk	PRDM16
chr1	3132600	3135000	14_ReprPCWk	PRDM16	chr1	3131800	3135200	13_ReprPC	PRDM16
chr1	3139400	3148200	15_NA	PRDM16	chr1	3136200	3146800	13_ReprPC	PRDM16
chr1	3148200	3149800	10_EnhA2	PRDM16	chr1	3148000	3150200	13_ReprPC	PRDM16
chr1	3225200	3229200	6_TxWk	PRDM16	chr1	3224800	3228600	14_ReprPCWk	PRDM16
chr1	3232400	3237000	6_TxWk	PRDM16	chr1	3232200	3236400	14_ReprPCWk	PRDM16
chr1	3238000	3242000	6_TxWk	PRDM16	chr1	3239200	3242400	13_ReprPC	PRDM16
chr1	3265200	3266000	9_EnhA1	PRDM16	chr1	3265000	3266000	13_ReprPC	PRDM16
chr1	3266000	3268400	10_EnhA2	PRDM16	chr1	3266400	3268000	13_ReprPC	PRDM16
chr1	3270200	3284400	15_NA	PRDM16	chr1	3271800	3282800	13_ReprPC	PRDM16
chr1	3311000	3318600	15_NA	PRDM16	chr1	3310800	3317200	13_ReprPC	PRDM16
chr1	3322000	3326600	6_TxWk	PRDM16	chr1	3323000	3327000	14_ReprPCWk	PRDM16
chr1	3374400	3377400	13_ReprPC	ARHGEF16	chr1	3375000	3379000	14_ReprPCWk	ARHGEF16
chr1	3420600	3421000	10_EnhA2	MEGF6	chr1	3420600	3421000	11_EnhWk	MEGF6
chr1	3425600	3432200	14_ReprPCWk	MEGF6	chr1	3426000	3432400	15_NA	MEGF6
chr1	3498200	3504800	15_NA	MEGF6	chr1	3496400	3507000	14_ReprPCWk	MEGF6
chr1	3542200	3542600	2_TssFlnk	TPRG1L	chr1	3542200	3542600	4_TssFlnkD	TPRG1L
chr1	3565800	3566400	2_TssFlnk	WRAP73	chr1	3565800	3566200	4_TssFlnkD	WRAP73
chr1	3588800	3589800	6_TxWk	TP73	chr1	3589000	3590200	14_ReprPCWk	TP73
chr1	3630200	3632800	14_ReprPCWk	TP73	chr1	3629600	3632000	12_TssBiv	TP73
chr1	3652200	3652765	10_EnhA2	TP73	chr1	3652000	3652765	7_EnhG1	TP73
chr1	3711800	3712600	2_TssFlnk	LRRC47	chr1	3711800	3712400	4_TssFlnkD	LRRC47
chr1	3730400	3734000	5_Tx	CEP104	chr1	3728645	3734000	6_TxWk	CEP104
chr1	3815600	3816000	2_TssFlnk	C1orf174	chr1	3815600	3816200	4_TssFlnkD	C1orf174
chr1	5947000	5947800	5_Tx	NPHP4	chr1	5946800	5947800	6_TxWk	NPHP4
chr1	6024000	6028800	5_Tx	NPHP4	chr1	6023200	6027000	6_TxWk	NPHP4
chr1	6086400	6090000	15_NA	KCNAB2	chr1	6086600	6091200	14_ReprPCWk	KCNAB2
chr1	6148400	6152200	14_ReprPCWk	KCNAB2	chr1	6149400	6153600	13_ReprPC	KCNAB2
chr1	6258000	6258400	8_EnhG2	RPL22	chr1	6258000	6258600	4_TssFlnkD	RPL22
chr1	6260800	6265200	14_ReprPCWk	RPL22	chr1	6260800	6265000	6_TxWk	RPL22
chr1	6269800	6277600	14_ReprPCWk	RNF207	chr1	6269800	6280400	6_TxWk	RNF207
chr1	6305400	6305638	2_TssFlnk	HES3	chr1	6305400	6305638	12_TssBiv	HES3
chr1	6307406	6309400	6_TxWk	GPR153	chr1	6307406	6310400	12_TssBiv	GPR153
chr1	6317600	6318200	11_EnhWk	GPR153	chr1	6317400	6318200	7_EnhG1	GPR153
chr1	6318200	6318800	6_TxWk	GPR153	chr1	6318200	6318600	9_EnhA1	GPR153
chr1	6326800	6328000	6_TxWk	ACOT7	chr1	6327200	6328200	11_EnhWk	ACOT7
chr1	6333600	6335200	5_Tx	ACOT7	chr1	6333600	6335800	6_TxWk	ACOT7
chr1	6336200	6336600	3_TssFlnkU	ACOT7	chr1	6336000	6336600	9_EnhA1	ACOT7
chr1	6341000	6341400	10_EnhA2	ACOT7	chr1	6341000	6341600	11_EnhWk	ACOT7
chr1	6352200	6353600	10_EnhA2	ACOT7	chr1	6352000	6354000	7_EnhG1	ACOT7
chr1	6376000	6377600	9_EnhA1	ACOT7	chr1	6375200	6377200	7_EnhG1	ACOT7
chr1	6385800	6386000	7_EnhG1	ACOT7	chr1	6385800	6386000	8_EnhG2	ACOT7
chr1	6386800	6388200	6_TxWk	ACOT7	chr1	6386200	6387800	5_Tx	ACOT7
chr1	6413800	6414400	9_EnhA1	ACOT7	chr1	6413800	6414600	11_EnhWk	ACOT7
chr1	6445200	6445400	2_TssFlnk	ACOT7	chr1	6445200	6445400	4_TssFlnkD	ACOT7
chr1	6526152	6527200	14_ReprPCWk	PLEKHG5	chr1	6526152	6527200	13_ReprPC	PLEKHG5
chr1	6534600	6542400	15_NA	PLEKHG5	chr1	6536200	6542600	6_TxWk	PLEKHG5
chr1	6551200	6551600	11_EnhWk	PLEKHG5	chr1	6551200	6551600	4_TssFlnkD	PLEKHG5
chr1	6558200	6558400	11_EnhWk	PLEKHG5	chr1	6558200	6558400	4_TssFlnkD	PLEKHG5
chr1	6562000	6562400	10_EnhA2	PLEKHG5	chr1	6562000	6562400	11_EnhWk	PLEKHG5
chr1	6569200	6569800	11_EnhWk	PLEKHG5	chr1	6569200	6570200	13_ReprPC	PLEKHG5
chr1	6572200	6572800	10_EnhA2	PLEKHG5	chr1	6572400	6572800	11_EnhWk	PLEKHG5
chr1	6599200	6600400	6_TxWk	NOL9	chr1	6598800	6600000	11_EnhWk	NOL9
chr1	6612400	6612800	6_TxWk	NOL9	chr1	6612400	6613000	7_EnhG1	NOL9
chr1	6615600	6615800	2_TssFlnk	TAS1R1	chr1	6615600	6615800	4_TssFlnkD	TAS1R1
chr1	6628400	6631400	14_ReprPCWk	TAS1R1	chr1	6628200	6632200	13_ReprPC	TAS1R1
chr1	6641400	6642000	7_EnhG1	ZBTB48	chr1	6641200	6642000	11_EnhWk	ZBTB48
chr1	6665800	6672400	15_NA	KLHL21	chr1	6665200	6672000	6_TxWk	KLHL21
chr1	6686400	6686600	7_EnhG1	THAP3	chr1	6686400	6686600	8_EnhG2	THAP3
chr1	6686600	6687600	5_Tx	THAP3	chr1	6686600	6687800	7_EnhG1	THAP3
chr1	6920000	6921000	9_EnhA1	CAMTA1	chr1	6919600	6920600	3_TssFlnkU	CAMTA1
chr1	6925000	6931600	6_TxWk	CAMTA1	chr1	6927600	6933000	11_EnhWk	CAMTA1
chr1	7017200	7020000	13_ReprPC	CAMTA1	chr1	7017600	7019400	14_ReprPCWk	CAMTA1
chr1	7111200	7114000	13_ReprPC	CAMTA1	chr1	7111800	7114200	14_ReprPCWk	CAMTA1
chr1	7130200	7130600	12_TssBiv	CAMTA1	chr1	7130000	7130600	2_TssFlnk	CAMTA1
chr1	7130600	7131800	13_ReprPC	CAMTA1	chr1	7130600	7131800	14_ReprPCWk	CAMTA1
chr1	7131800	7132800	14_ReprPCWk	CAMTA1	chr1	7131800	7133000	13_ReprPC	CAMTA1
chr1	7177400	7178200	3_TssFlnkU	CAMTA1	chr1	7177400	7178200	4_TssFlnkD	CAMTA1
chr1	7178200	7178800	10_EnhA2	CAMTA1	chr1	7178200	7179000	12_TssBiv	CAMTA1
chr1	7283400	7284400	9_EnhA1	CAMTA1	chr1	7283400	7285000	11_EnhWk	CAMTA1
chr1	7324200	7326000	6_TxWk	CAMTA1	chr1	7324800	7326800	11_EnhWk	CAMTA1
chr1	7328000	7338800	15_NA	CAMTA1	chr1	7327800	7339200	6_TxWk	CAMTA1
chr1	7394400	7395800	9_EnhA1	CAMTA1	chr1	7394800	7396200	11_EnhWk	CAMTA1
chr1	7402400	7433800	15_NA	CAMTA1	chr1	7413400	7439200	14_ReprPCWk	CAMTA1
chr1	7440000	7448200	15_NA	CAMTA1	chr1	7440200	7447800	14_ReprPCWk	CAMTA1
chr1	7450200	7461200	15_NA	CAMTA1	chr1	7450200	7461200	6_TxWk	CAMTA1
chr1	7461400	7463200	9_EnhA1	CAMTA1	chr1	7461200	7463000	11_EnhWk	CAMTA1
chr1	7532200	7538600	15_NA	CAMTA1	chr1	7532400	7536600	14_ReprPCWk	CAMTA1
chr1	7538600	7539200	10_EnhA2	CAMTA1	chr1	7538400	7539200	11_EnhWk	CAMTA1
chr1	7614600	7615400	9_EnhA1	CAMTA1	chr1	7614200	7615400	10_EnhA2	CAMTA1
chr1	7615400	7615600	10_EnhA2	CAMTA1	chr1	7615400	7615600	9_EnhA1	CAMTA1
chr1	7616000	7653400	15_NA	CAMTA1	chr1	7618000	7646000	14_ReprPCWk	CAMTA1
chr1	7697000	7705000	15_NA	CAMTA1	chr1	7694600	7703000	14_ReprPCWk	CAMTA1
chr1	7724000	7727600	15_NA	CAMTA1	chr1	7723200	7728000	14_ReprPCWk	CAMTA1
chr1	7773200	7774400	14_ReprPCWk	CAMTA1	chr1	7772600	7774400	13_ReprPC	CAMTA1
chr1	7832200	7832800	8_EnhG2	VAMP3	chr1	7832200	7832800	4_TssFlnkD	VAMP3
chr1	7844380	7845000	2_TssFlnk	PER3	chr1	7844400	7844800	4_TssFlnkD	PER3
chr1	7980600	7981800	6_TxWk	TNFRSF9	chr1	7981000	7981800	11_EnhWk	TNFRSF9
chr1	8014351	8015000	2_TssFlnk	PARK7	chr1	8014400	8014800	1_TssA	PARK7
chr1	8020600	8021000	2_TssFlnk	PARK7	chr1	8020600	8021000	4_TssFlnkD	PARK7
chr1	8022600	8022800	2_TssFlnk	PARK7	chr1	8022600	8022800	3_TssFlnkU	PARK7
chr1	8022800	8023000	6_TxWk	PARK7	chr1	8022800	8023000	8_EnhG2	PARK7
chr1	8065200	8067000	10_EnhA2	ERRFI1	chr1	8065400	8066800	9_EnhA1	ERRFI1
chr1	8075600	8076600	8_EnhG2	ERRFI1	chr1	8075400	8076200	3_TssFlnkU	ERRFI1
chr1	8076600	8077000	7_EnhG1	ERRFI1	chr1	8076400	8077000	11_EnhWk	ERRFI1
chr1	8377886	8378800	2_TssFlnk	SLC45A1	chr1	8377886	8378800	4_TssFlnkD	SLC45A1
chr1	8404200	8404227	10_EnhA2	SLC45A1	chr1	8404200	8404227	11_EnhWk	SLC45A1
chr1	8432600	8433800	9_EnhA1	RERE	chr1	8432400	8433600	7_EnhG1	RERE
chr1	8455400	8456400	9_EnhA1	RERE	chr1	8455800	8456400	7_EnhG1	RERE
chr1	8479800	8480800	5_Tx	RERE	chr1	8479200	8480800	7_EnhG1	RERE
chr1	8515400	8515800	9_EnhA1	RERE	chr1	8515400	8515800	11_EnhWk	RERE
chr1	8515800	8516400	3_TssFlnkU	RERE	chr1	8515800	8516200	9_EnhA1	RERE
chr1	8524000	8524600	11_EnhWk	RERE	chr1	8523800	8524400	9_EnhA1	RERE
chr1	8526600	8543000	15_NA	RERE	chr1	8526600	8536800	6_TxWk	RERE
chr1	8586400	8598400	6_TxWk	RERE	chr1	8587600	8598800	15_NA	RERE
chr1	8599000	8600400	6_TxWk	RERE	chr1	8598800	8600200	11_EnhWk	RERE
chr1	8631800	8650400	6_TxWk	RERE	chr1	8631800	8650600	15_NA	RERE
chr1	8659000	8673400	15_NA	RERE	chr1	8660200	8673000	6_TxWk	RERE
chr1	8685800	8687400	9_EnhA1	RERE	chr1	8685800	8687000	11_EnhWk	RERE
chr1	8687600	8691600	6_TxWk	RERE	chr1	8687200	8692200	11_EnhWk	RERE
chr1	8760800	8761000	10_EnhA2	RERE	chr1	8760800	8761000	11_EnhWk	RERE
chr1	8761600	8763400	1_TssA	RERE	chr1	8761000	8763200	2_TssFlnk	RERE
chr1	8849200	8875600	15_NA	RERE	chr1	8855600	8873000	6_TxWk	RERE
chr1	9095166	9099600	14_ReprPCWk	SLC2A5	chr1	9095166	9101600	13_ReprPC	SLC2A5
chr1	9129000	9129600	2_TssFlnk	SLC2A5	chr1	9128600	9129600	3_TssFlnkU	SLC2A5
chr1	9144600	9145000	4_TssFlnkD	SLC2A5	chr1	9144400	9145000	11_EnhWk	SLC2A5
chr1	9160800	9162200	6_TxWk	GPR157	chr1	9160800	9161800	11_EnhWk	GPR157
chr1	9187400	9189000	2_TssFlnk	GPR157	chr1	9187200	9189000	4_TssFlnkD	GPR157
chr1	9189000	9189200	1_TssA	GPR157	chr1	9189000	9189229	2_TssFlnk	GPR157
chr1	9295600	9296200	4_TssFlnkD	H6PD	chr1	9295600	9296000	3_TssFlnkU	H6PD
chr1	9301000	9302600	11_EnhWk	H6PD	chr1	9300200	9302600	9_EnhA1	H6PD
chr1	9302800	9303200	2_TssFlnk	H6PD	chr1	9302600	9303200	3_TssFlnkU	H6PD
chr1	9303200	9303400	11_EnhWk	H6PD	chr1	9303200	9303400	9_EnhA1	H6PD
chr1	9376400	9378400	6_TxWk	SPSB1	chr1	9375400	9378600	11_EnhWk	SPSB1
chr1	9381400	9384400	5_Tx	SPSB1	chr1	9381600	9384400	6_TxWk	SPSB1
chr1	9384400	9385600	6_TxWk	SPSB1	chr1	9384400	9386400	11_EnhWk	SPSB1
chr1	9386200	9386800	9_EnhA1	SPSB1	chr1	9386400	9386800	4_TssFlnkD	SPSB1
chr1	9404000	9409200	6_TxWk	SPSB1	chr1	9405200	9409400	14_ReprPCWk	SPSB1
chr1	9410000	9411000	3_TssFlnkU	SPSB1	chr1	9410000	9410800	11_EnhWk	SPSB1
chr1	9599600	9600200	1_TssA	SLC25A33	chr1	9599800	9600200	2_TssFlnk	SLC25A33
chr1	9600200	9600600	2_TssFlnk	SLC25A33	chr1	9600200	9600600	4_TssFlnkD	SLC25A33
chr1	9747000	9747200	10_EnhA2	PIK3CD	chr1	9747000	9747200	2_TssFlnk	PIK3CD
chr1	9747200	9747400	3_TssFlnkU	PIK3CD	chr1	9747200	9747400	1_TssA	PIK3CD
chr1	9748400	9749600	2_TssFlnk	PIK3CD	chr1	9748000	9749400	4_TssFlnkD	PIK3CD
chr1	9749600	9750600	1_TssA	PIK3CD	chr1	9750000	9751000	4_TssFlnkD	PIK3CD
chr1	9751000	9751600	2_TssFlnk	PIK3CD	chr1	9751000	9751400	11_EnhWk	PIK3CD
chr1	9908334	9913200	6_TxWk	CTNNBIP1	chr1	9908334	9912400	14_ReprPCWk	CTNNBIP1
chr1	9929200	9931600	5_Tx	CTNNBIP1	chr1	9929400	9932600	6_TxWk	CTNNBIP1
chr1	9939600	9941800	14_ReprPCWk	CTNNBIP1	chr1	9940000	9941600	6_TxWk	CTNNBIP1
chr1	10004000	10004400	2_TssFlnk	NMNAT1	chr1	10004000	10004600	4_TssFlnkD	NMNAT1
chr1	10094200	10095000	2_TssFlnk	UBE4B	chr1	10094000	10095000	4_TssFlnkD	UBE4B
chr1	10126400	10126600	2_TssFlnk	UBE4B	chr1	10126400	10126600	9_EnhA1	UBE4B
chr1	10272800	10273600	11_EnhWk	KIF1B	chr1	10272800	10273400	2_TssFlnk	KIF1B
chr1	10277800	10278400	11_EnhWk	KIF1B	chr1	10277800	10278800	4_TssFlnkD	KIF1B
chr1	10370000	10371800	9_EnhA1	KIF1B	chr1	10370400	10371800	10_EnhA2	KIF1B
chr1	10382000	10387200	5_Tx	KIF1B	chr1	10382600	10386200	6_TxWk	KIF1B
chr1	10461200	10461400	3_TssFlnkU	PGD	chr1	10461200	10461400	8_EnhG2	PGD
chr1	10531400	10532200	2_TssFlnk	DFFA	chr1	10531600	10532200	4_TssFlnkD	DFFA
chr1	10571800	10572600	9_EnhA1	PEX14	chr1	10572000	10573000	11_EnhWk	PEX14
chr1	10589000	10589600	9_EnhA1	PEX14	chr1	10589000	10589600	11_EnhWk	PEX14
chr1	10633800	10634000	11_EnhWk	PEX14	chr1	10633800	10634000	10_EnhA2	PEX14
chr1	10634000	10635000	6_TxWk	PEX14	chr1	10634000	10635200	11_EnhWk	PEX14
chr1	10635000	10635600	10_EnhA2	PEX14	chr1	10635200	10635600	9_EnhA1	PEX14
chr1	10696661	10698400	14_ReprPCWk	CASZ1	chr1	10697200	10698400	13_ReprPC	CASZ1
chr1	10698400	10699000	13_ReprPC	CASZ1	chr1	10698400	10699000	12_TssBiv	CASZ1
chr1	10699000	10702000	14_ReprPCWk	CASZ1	chr1	10699000	10701200	13_ReprPC	CASZ1
chr1	10702000	10704400	15_NA	CASZ1	chr1	10701200	10704200	14_ReprPCWk	CASZ1
chr1	10704800	10709000	15_NA	CASZ1	chr1	10705000	10708600	14_ReprPCWk	CASZ1
chr1	10753600	10755600	2_TssFlnk	CASZ1	chr1	10753600	10755600	12_TssBiv	CASZ1
chr1	11007200	11009800	14_ReprPCWk	C1orf127	chr1	11006528	11008800	13_ReprPC	C1orf127
chr1	11040000	11040800	2_TssFlnk	C1orf127	chr1	11039800	11041000	12_TssBiv	C1orf127
chr1	11119400	11120081	2_TssFlnk	SRM	chr1	11119200	11120081	1_TssA	SRM
chr1	11212000	11212800	7_EnhG1	MTOR	chr1	11212200	11213000	9_EnhA1	MTOR
chr1	11218800	11219000	10_EnhA2	MTOR	chr1	11218800	11219000	11_EnhWk	MTOR
chr1	11238200	11239800	5_Tx	MTOR	chr1	11237400	11240000	11_EnhWk	MTOR
chr1	11334200	11334600	2_TssFlnk	UBIAD1	chr1	11334200	11334800	4_TssFlnkD	UBIAD1
chr1	11334600	11335400	6_TxWk	UBIAD1	chr1	11334800	11335400	11_EnhWk	UBIAD1
chr1	11711400	11713800	14_ReprPCWk	FBXO2	chr1	11710800	11714200	13_ReprPC	FBXO2
chr1	11740200	11740600	2_TssFlnk	MAD2L2	chr1	11740200	11740600	4_TssFlnkD	MAD2L2
chr1	11742200	11742800	11_EnhWk	MAD2L2	chr1	11742200	11742600	14_ReprPCWk	MAD2L2
chr1	11753000	11754200	11_EnhWk	DRAXIN	chr1	11753400	11754400	12_TssBiv	DRAXIN
chr1	11754200	11758200	14_ReprPCWk	DRAXIN	chr1	11754400	11760400	13_ReprPC	DRAXIN
chr1	11780000	11785600	14_ReprPCWk	DRAXIN	chr1	11780000	11785800	13_ReprPC	DRAXIN
chr1	11797600	11797800	2_TssFlnk	AGTRAP	chr1	11797600	11797800	11_EnhWk	AGTRAP
chr1	11838600	11841600	15_NA	C1orf167	chr1	11838000	11841200	14_ReprPCWk	C1orf167
chr1	11864000	11864800	4_TssFlnkD	MTHFR	chr1	11864000	11864600	3_TssFlnkU	MTHFR
chr1	11867400	11867800	11_EnhWk	CLCN6	chr1	11867400	11867800	7_EnhG1	CLCN6
chr1	11881200	11882200	10_EnhA2	CLCN6	chr1	11880600	11882200	7_EnhG1	CLCN6
chr1	11905766	11908000	5_Tx	NPPA	chr1	11906200	11907600	6_TxWk	NPPA
chr1	11985200	11986485	2_TssFlnk	KIAA2013	chr1	11985600	11986485	1_TssA	KIAA2013
chr1	11994262	11994600	4_TssFlnkD	PLOD1	chr1	11994262	11994600	3_TssFlnkU	PLOD1
chr1	11995000	11996000	2_TssFlnk	PLOD1	chr1	11995400	11996200	4_TssFlnkD	PLOD1
chr1	11998600	11999000	8_EnhG2	PLOD1	chr1	11998600	11999000	3_TssFlnkU	PLOD1
chr1	11999000	11999200	7_EnhG1	PLOD1	chr1	11999000	11999200	9_EnhA1	PLOD1
chr1	12040800	12041400	2_TssFlnk	MFN2	chr1	12041000	12041600	4_TssFlnkD	MFN2
chr1	12131800	12135600	14_ReprPCWk	TNFRSF8	chr1	12129600	12135400	13_ReprPC	TNFRSF8
chr1	12135600	12136200	12_TssBiv	TNFRSF8	chr1	12135400	12136400	14_ReprPCWk	TNFRSF8
chr1	12140600	12149200	15_NA	TNFRSF8	chr1	12139800	12148000	14_ReprPCWk	TNFRSF8
chr1	12203400	12204264	10_EnhA2	TNFRSF8	chr1	12203200	12204000	11_EnhWk	TNFRSF8
chr1	12227060	12227200	2_TssFlnk	TNFRSF1B	chr1	12227060	12227200	1_TssA	TNFRSF1B
chr1	12244000	12246200	11_EnhWk	TNFRSF1B	chr1	12244000	12246400	9_EnhA1	TNFRSF1B
chr1	12484800	12487000	6_TxWk	VPS13D	chr1	12485000	12486600	11_EnhWk	VPS13D
chr1	12487000	12492200	5_Tx	VPS13D	chr1	12489000	12493000	6_TxWk	VPS13D
chr1	12493400	12494800	9_EnhA1	VPS13D	chr1	12493000	12494600	11_EnhWk	VPS13D
chr1	12524200	12525200	11_EnhWk	VPS13D	chr1	12524200	12525800	9_EnhA1	VPS13D
chr1	12539200	12540600	11_EnhWk	VPS13D	chr1	12539200	12540600	7_EnhG1	VPS13D
chr1	12540600	12541400	9_EnhA1	VPS13D	chr1	12540600	12541800	11_EnhWk	VPS13D
chr1	12639800	12640800	10_EnhA2	DHRS3	chr1	12640000	12640800	11_EnhWk	DHRS3
chr1	12652000	12653200	14_ReprPCWk	DHRS3	chr1	12652000	12653000	6_TxWk	DHRS3
chr1	12653200	12655200	13_ReprPC	DHRS3	chr1	12653000	12656000	11_EnhWk	DHRS3
chr1	12658600	12660800	13_ReprPC	DHRS3	chr1	12657400	12660400	14_ReprPCWk	DHRS3
chr1	12664600	12670200	14_ReprPCWk	DHRS3	chr1	12665400	12668800	6_TxWk	DHRS3
chr1	12673800	12675200	14_ReprPCWk	DHRS3	chr1	12673400	12674800	6_TxWk	DHRS3
chr1	12710400	12712400	14_ReprPCWk	AADACL4	chr1	12711000	12713000	13_ReprPC	AADACL4
chr1	13909960	13910000	12_TssBiv	PDPN	chr1	13909960	13910000	13_ReprPC	PDPN
chr1	14988000	15015800	15_NA	KAZN	chr1	14983000	15019200	14_ReprPCWk	KAZN
chr1	15256200	15257200	4_TssFlnkD	KAZN	chr1	15256600	15257400	11_EnhWk	KAZN
chr1	15257200	15266200	6_TxWk	KAZN	chr1	15257400	15266200	15_NA	KAZN
chr1	15266200	15266800	10_EnhA2	KAZN	chr1	15266400	15266800	9_EnhA1	KAZN
chr1	15267200	15269800	10_EnhA2	KAZN	chr1	15268000	15269800	11_EnhWk	KAZN
chr1	15291800	15294200	5_Tx	KAZN	chr1	15291800	15293600	6_TxWk	KAZN
chr1	15427800	15441600	15_NA	KAZN	chr1	15431600	15441000	14_ReprPCWk	KAZN
chr1	15441600	15444539	14_ReprPCWk	KAZN	chr1	15441000	15444400	13_ReprPC	KAZN
chr1	15479028	15480800	2_TssFlnk	TMEM51	chr1	15479028	15481600	12_TssBiv	TMEM51
chr1	15613000	15616600	14_ReprPCWk	FHAD1	chr1	15612800	15615600	13_ReprPC	FHAD1
chr1	15616600	15625400	15_NA	FHAD1	chr1	15615600	15626200	14_ReprPCWk	FHAD1
chr1	15721200	15722800	14_ReprPCWk	FHAD1	chr1	15720400	15722600	13_ReprPC	FHAD1
chr1	15722800	15726779	15_NA	FHAD1	chr1	15722600	15726779	14_ReprPCWk	FHAD1
chr1	15738400	15739000	11_EnhWk	EFHD2	chr1	15738400	15738800	7_EnhG1	EFHD2
chr1	15739000	15740200	6_TxWk	EFHD2	chr1	15739000	15739800	7_EnhG1	EFHD2
chr1	15745600	15746800	6_TxWk	EFHD2	chr1	15745600	15747600	5_Tx	EFHD2
chr1	15797600	15815000	15_NA	CELA2B	chr1	15798600	15815200	14_ReprPCWk	CELA2B
chr1	15850200	15851400	1_TssA	CASP9	chr1	15850600	15851800	2_TssFlnk	CASP9
chr1	15898000	15898400	9_EnhA1	DNAJC16	chr1	15898000	15898400	7_EnhG1	DNAJC16
chr1	15911800	15918874	15_NA	DNAJC16	chr1	15911800	15918874	14_ReprPCWk	DNAJC16
chr1	15945600	15945800	2_TssFlnk	DDI2	chr1	15945600	15945800	9_EnhA1	DDI2
chr1	15945800	15946400	6_TxWk	DDI2	chr1	15945800	15946600	7_EnhG1	DDI2
chr1	16011800	16012800	2_TssFlnk	PLEKHM2	chr1	16011600	16012600	4_TssFlnkD	PLEKHM2
chr1	16062900	16063200	6_TxWk	SLC25A34	chr1	16062900	16063400	9_EnhA1	SLC25A34
chr1	16068917	16074477	15_NA	TMEM82	chr1	16071000	16074477	14_ReprPCWk	TMEM82
chr1	16086200	16087200	6_TxWk	FBLIM1	chr1	16086400	16087200	11_EnhWk	FBLIM1
chr1	16092400	16093000	10_EnhA2	FBLIM1	chr1	16092200	16092800	7_EnhG1	FBLIM1
chr1	16212600	16213600	1_TssA	SPEN	chr1	16212400	16213400	3_TssFlnkU	SPEN
chr1	16245200	16246600	7_EnhG1	SPEN	chr1	16245400	16246600	11_EnhWk	SPEN
chr1	16264400	16266955	5_Tx	SPEN	chr1	16263600	16266955	7_EnhG1	SPEN
chr1	16274000	16275000	11_EnhWk	ZBTB17	chr1	16274200	16274800	7_EnhG1	ZBTB17
chr1	16281000	16282400	6_TxWk	ZBTB17	chr1	16280800	16282200	7_EnhG1	ZBTB17
chr1	16283400	16286200	6_TxWk	ZBTB17	chr1	16283600	16286400	11_EnhWk	ZBTB17
chr1	16288800	16291600	6_TxWk	ZBTB17	chr1	16289400	16292600	11_EnhWk	ZBTB17
chr1	16301200	16301400	8_EnhG2	ZBTB17	chr1	16301200	16301400	11_EnhWk	ZBTB17
chr1	16302600	16302627	2_TssFlnk	ZBTB17	chr1	16302600	16302627	4_TssFlnkD	ZBTB17
chr1	16330731	16334200	14_ReprPCWk	SRARP	chr1	16330731	16333600	13_ReprPC	C1orf64
chr1	16334200	16335302	15_NA	SRARP	chr1	16333600	16335302	14_ReprPCWk	C1orf64
chr1	16340523	16342400	6_TxWk	HSPB7	chr1	16340523	16343400	11_EnhWk	HSPB7
chr1	16347600	16352400	14_ReprPCWk	CLCNKA	chr1	16347800	16353400	13_ReprPC	CLCNKA
chr1	16355600	16360545	14_ReprPCWk	CLCNKA	chr1	16353800	16358600	13_ReprPC	CLCNKA
chr1	16370272	16374800	14_ReprPCWk	CLCNKB	chr1	16370272	16375000	13_ReprPC	CLCNKB
chr1	16393600	16395000	11_EnhWk	FAM131C	chr1	16393200	16394800	12_TssBiv	FAM131C
chr1	16471800	16474000	8_EnhG2	EPHA2	chr1	16472000	16473800	3_TssFlnkU	EPHA2
chr1	16524349	16532400	15_NA	ARHGEF19	chr1	16524349	16532400	6_TxWk	ARHGEF19
chr1	16555600	16556038	15_NA	C1orf134	chr1	16555368	16556038	13_ReprPC	C1orf134
chr1	16573334	16573800	5_Tx	FBXO42	chr1	16573400	16573800	7_EnhG1	FBXO42
chr1	16573800	16574800	11_EnhWk	FBXO42	chr1	16573800	16575400	9_EnhA1	FBXO42
chr1	16605000	16605200	11_EnhWk	FBXO42	chr1	16605000	16605200	9_EnhA1	FBXO42
chr1	16679200	16679600	4_TssFlnkD	SZRD1	chr1	16679200	16679600	3_TssFlnkU	SZRD1
chr1	16767167	16767800	2_TssFlnk	NECAP2	chr1	16767167	16768000	1_TssA	NECAP2
chr1	16768000	16768400	2_TssFlnk	NECAP2	chr1	16768000	16768400	4_TssFlnkD	NECAP2
chr1	16939400	16939800	2_TssFlnk	NBPF1	chr1	16939400	16940057	1_TssA	NBPF1
chr1	17067400	17071600	14_ReprPCWk	CROCC	chr1	17068000	17070600	6_TxWk	CROCC
chr1	17108000	17108400	9_EnhA1	CROCC	chr1	17108000	17108600	12_TssBiv	CROCC
chr1	17221600	17222000	2_TssFlnk	CROCC	chr1	17221400	17222000	4_TssFlnkD	CROCC
chr1	17224400	17230000	14_ReprPCWk	CROCC	chr1	17223800	17229200	6_TxWk	CROCC
chr1	17230000	17230400	2_TssFlnk	CROCC	chr1	17229800	17230400	9_EnhA1	CROCC
chr1	17230400	17230800	1_TssA	CROCC	chr1	17230400	17231000	3_TssFlnkU	CROCC
chr1	17233000	17240000	15_NA	CROCC	chr1	17233200	17238400	14_ReprPCWk	CROCC
chr1	17241600	17245600	6_TxWk	CROCC	chr1	17242000	17247600	15_NA	CROCC
chr1	17287200	17287800	2_TssFlnk	CROCC	chr1	17287200	17287800	4_TssFlnkD	CROCC
chr1	17300997	17305400	6_TxWk	MFAP2	chr1	17300997	17303800	5_Tx	MFAP2
chr1	17428400	17441200	14_ReprPCWk	PADI2	chr1	17431200	17445200	13_ReprPC	PADI2
chr1	17540200	17541800	6_TxWk	PADI1	chr1	17539800	17541400	13_ReprPC	PADI1
chr1	17541800	17542800	11_EnhWk	PADI1	chr1	17541400	17542800	12_TssBiv	PADI1
chr1	17575593	17578600	15_NA	PADI3	chr1	17575593	17577400	14_ReprPCWk	PADI3
chr1	17578800	17579800	15_NA	PADI3	chr1	17578600	17580000	14_ReprPCWk	PADI3
chr1	17644400	17646800	14_ReprPCWk	PADI4	chr1	17643400	17646000	13_ReprPC	PADI4
chr1	17866800	17868000	2_TssFlnk	ARHGEF10L	chr1	17867000	17867800	4_TssFlnkD	ARHGEF10L
chr1	17872000	17872400	11_EnhWk	ARHGEF10L	chr1	17872000	17872400	9_EnhA1	ARHGEF10L
chr1	17881000	17887400	15_NA	ARHGEF10L	chr1	17881200	17885200	6_TxWk	ARHGEF10L
chr1	17894400	17895600	6_TxWk	ARHGEF10L	chr1	17894000	17895400	11_EnhWk	ARHGEF10L
chr1	17901400	17902400	11_EnhWk	ARHGEF10L	chr1	17901400	17902600	13_ReprPC	ARHGEF10L
chr1	17915200	17916200	7_EnhG1	ARHGEF10L	chr1	17915000	17916200	11_EnhWk	ARHGEF10L
chr1	17932600	17933800	6_TxWk	ARHGEF10L	chr1	17932400	17933400	11_EnhWk	ARHGEF10L
chr1	18081808	18084200	15_NA	ACTL8	chr1	18081808	18083400	14_ReprPCWk	ACTL8
chr1	18084600	18092200	15_NA	ACTL8	chr1	18084800	18090800	6_TxWk	ACTL8
chr1	18095200	18096400	11_EnhWk	ACTL8	chr1	18094800	18096200	9_EnhA1	ACTL8
chr1	18809000	18812478	14_ReprPCWk	KLHDC7A	chr1	18807424	18812478	15_NA	KLHDC7A
chr1	18958600	18969600	13_ReprPC	PAX7	chr1	18957500	18974600	12_TssBiv	PAX7
chr1	18980000	18987200	13_ReprPC	PAX7	chr1	18980800	18991400	14_ReprPCWk	PAX7
chr1	19015000	19019200	15_NA	PAX7	chr1	19015400	19019200	6_TxWk	PAX7
chr1	19027000	19037600	14_ReprPCWk	PAX7	chr1	19025000	19035400	15_NA	PAX7
chr1	19168600	19172200	13_ReprPC	TAS1R2	chr1	19167600	19173200	14_ReprPCWk	TAS1R2
chr1	19195200	19209400	6_TxWk	ALDH4A1	chr1	19197926	19207200	14_ReprPCWk	ALDH4A1
chr1	19197926	19209400	6_TxWk	ALDH4A1	chr1	19197926	19207200	14_ReprPCWk	ALDH4A1
chr1	19256200	19265600	6_TxWk	IFFO2	chr1	19256800	19264600	15_NA	IFFO2
chr1	19278000	19278600	9_EnhA1	IFFO2	chr1	19278200	19278800	11_EnhWk	IFFO2
chr1	19281000	19281800	1_TssA	IFFO2	chr1	19280600	19281800	4_TssFlnkD	IFFO2
chr1	19615000	19615744	2_TssFlnk	AKR7A3	chr1	19615200	19615744	4_TssFlnkD	AKR7A3
chr1	19717200	19717600	11_EnhWk	CAPZB	chr1	19717200	19717800	9_EnhA1	CAPZB
chr1	19717800	19718000	1_TssA	CAPZB	chr1	19717800	19718000	10_EnhA2	CAPZB
chr1	19761600	19763800	11_EnhWk	CAPZB	chr1	19761400	19764200	9_EnhA1	CAPZB
chr1	19763800	19767600	6_TxWk	CAPZB	chr1	19764200	19768000	7_EnhG1	CAPZB
chr1	19779400	19781400	11_EnhWk	CAPZB	chr1	19779400	19780800	9_EnhA1	CAPZB
chr1	19781400	19787200	6_TxWk	CAPZB	chr1	19782000	19785600	7_EnhG1	CAPZB
chr1	19790000	19794800	6_TxWk	CAPZB	chr1	19791800	19795600	7_EnhG1	CAPZB
chr1	20023800	20051600	6_TxWk	TMCO4	chr1	20031200	20051600	15_NA	TMCO4
chr1	20082600	20084400	11_EnhWk	TMCO4	chr1	20082200	20084400	6_TxWk	TMCO4
chr1	20209800	20210600	2_TssFlnk	OTUD3	chr1	20209800	20210400	4_TssFlnkD	OTUD3
chr1	20214800	20217000	6_TxWk	OTUD3	chr1	20215200	20216600	11_EnhWk	OTUD3
chr1	20354672	20355800	13_ReprPC	PLA2G5	chr1	20354800	20355800	14_ReprPCWk	PLA2G5
chr1	20808884	20809200	2_TssFlnk	CAMK2N1	chr1	20809000	20809200	4_TssFlnkD	CAMK2N1
chr1	20809200	20809400	1_TssA	CAMK2N1	chr1	20809200	20809400	11_EnhWk	CAMK2N1
chr1	20812400	20812713	1_TssA	CAMK2N1	chr1	20812400	20812713	2_TssFlnk	CAMK2N1
chr1	20834600	20834654	1_TssA	MUL1	chr1	20834600	20834654	2_TssFlnk	MUL1
chr1	20915441	20916200	15_NA	CDA	chr1	20915441	20916600	11_EnhWk	CDA
chr1	20941000	20942800	6_TxWk	CDA	chr1	20941000	20943000	10_EnhA2	CDA
chr1	20961600	20962800	6_TxWk	PINK1	chr1	20961600	20962600	11_EnhWk	PINK1
chr1	20986400	20987400	2_TssFlnk	DDOST	chr1	20986400	20987200	4_TssFlnkD	DDOST
chr1	20990507	20996400	15_NA	KIF17	chr1	20990507	20997800	6_TxWk	KIF17
chr1	21010600	21022800	15_NA	KIF17	chr1	21006600	21022200	14_ReprPCWk	KIF17
chr1	21023000	21023600	1_TssA	KIF17	chr1	21022800	21023400	2_TssFlnk	KIF17
chr1	21023600	21024000	3_TssFlnkU	KIF17	chr1	21023600	21024000	4_TssFlnkD	KIF17
chr1	21024600	21026000	9_EnhA1	KIF17	chr1	21024000	21026200	11_EnhWk	KIF17
chr1	21037600	21041600	6_TxWk	KIF17	chr1	21037600	21041800	14_ReprPCWk	KIF17
chr1	21369200	21370200	9_EnhA1	EIF4G3	chr1	21369000	21370400	11_EnhWk	EIF4G3
chr1	21421800	21430000	6_TxWk	EIF4G3	chr1	21418800	21427000	5_Tx	EIF4G3
chr1	21500400	21500600	6_TxWk	EIF4G3	chr1	21500400	21500600	4_TssFlnkD	EIF4G3
chr1	21500600	21501000	8_EnhG2	EIF4G3	chr1	21500600	21501000	2_TssFlnk	EIF4G3
chr1	21564800	21566800	9_EnhA1	ECE1	chr1	21564600	21566800	7_EnhG1	ECE1
chr1	21578000	21579200	11_EnhWk	ECE1	chr1	21578400	21579600	7_EnhG1	ECE1
chr1	21589800	21592800	6_TxWk	ECE1	chr1	21589800	21592000	7_EnhG1	ECE1
chr1	21604000	21605600	6_TxWk	ECE1	chr1	21604200	21606400	7_EnhG1	ECE1
chr1	21644000	21645000	11_EnhWk	ECE1	chr1	21643800	21645200	9_EnhA1	ECE1
chr1	21650600	21651600	9_EnhA1	ECE1	chr1	21650800	21652000	3_TssFlnkU	ECE1
chr1	21665000	21670600	6_TxWk	ECE1	chr1	21667000	21670800	11_EnhWk	ECE1
chr1	21801200	21803000	5_Tx	NBPF3	chr1	21800200	21803200	6_TxWk	NBPF3
chr1	21810000	21811498	14_ReprPCWk	NBPF3	chr1	21809400	21811400	6_TxWk	NBPF3
chr1	21836000	21837000	1_TssA	ALPL	chr1	21836400	21837200	4_TssFlnkD	ALPL
chr1	21837000	21838600	3_TssFlnkU	ALPL	chr1	21837200	21838600	8_EnhG2	ALPL
chr1	21839800	21841000	6_TxWk	ALPL	chr1	21839800	21840800	5_Tx	ALPL
chr1	21847000	21847800	11_EnhWk	ALPL	chr1	21847000	21848000	7_EnhG1	ALPL
chr1	21877800	21878800	6_TxWk	ALPL	chr1	21878000	21878600	10_EnhA2	ALPL
chr1	21878800	21879800	10_EnhA2	ALPL	chr1	21878600	21879800	9_EnhA1	ALPL
chr1	21894400	21895400	3_TssFlnkU	ALPL	chr1	21894400	21896000	9_EnhA1	ALPL
chr1	21900400	21901800	9_EnhA1	ALPL	chr1	21900200	21902000	11_EnhWk	ALPL
chr1	21922708	21925000	15_NA	RAP1GAP	chr1	21922708	21924200	14_ReprPCWk	RAP1GAP
chr1	22033000	22034600	11_EnhWk	USP48	chr1	22032400	22034800	7_EnhG1	USP48
chr1	22092400	22095800	6_TxWk	USP48	chr1	22092000	22094600	11_EnhWk	USP48
chr1	22138758	22142800	15_NA	LDLRAD2	chr1	22138758	22143000	14_ReprPCWk	LDLRAD2
chr1	22263600	22263790	10_EnhA2	HSPG2	chr1	22263600	22263790	2_TssFlnk	HSPG2
chr1	22328149	22339032	15_NA	CELA3A	chr1	22329800	22339032	14_ReprPCWk	CELA3A
chr1	22387000	22390200	6_TxWk	CDC42	chr1	22388200	22390600	7_EnhG1	CDC42
chr1	22460200	22463800	14_ReprPCWk	WNT4	chr1	22460800	22463800	13_ReprPC	WNT4
chr1	22791800	22815800	15_NA	ZBTB40	chr1	22779800	22816400	6_TxWk	ZBTB40
chr1	22816600	22817600	5_Tx	ZBTB40	chr1	22816400	22817200	7_EnhG1	ZBTB40
chr1	22817600	22819000	6_TxWk	ZBTB40	chr1	22817200	22818600	5_Tx	ZBTB40
chr1	22830000	22831200	10_EnhA2	ZBTB40	chr1	22829800	22831200	11_EnhWk	ZBTB40
chr1	22892200	22897200	14_ReprPCWk	EPHA8	chr1	22890200	22896400	13_ReprPC	EPHA8
chr1	22927400	22929800	14_ReprPCWk	EPHA8	chr1	22926600	22930087	13_ReprPC	EPHA8
chr1	22964600	22966101	14_ReprPCWk	C1QA	chr1	22964800	22966101	13_ReprPC	C1QA
chr1	23037332	23038000	2_TssFlnk	EPHB2	chr1	23037332	23038400	12_TssBiv	EPHB2
chr1	23068000	23073000	15_NA	EPHB2	chr1	23068200	23072800	14_ReprPCWk	EPHB2
chr1	23135800	23153000	15_NA	EPHB2	chr1	23136200	23150200	14_ReprPCWk	EPHB2
chr1	23154800	23158200	6_TxWk	EPHB2	chr1	23154000	23158000	14_ReprPCWk	EPHB2
chr1	23204000	23206200	6_TxWk	EPHB2	chr1	23203400	23205800	13_ReprPC	EPHB2
chr1	23228200	23237800	15_NA	EPHB2	chr1	23228200	23236800	14_ReprPCWk	EPHB2
chr1	23237800	23241818	14_ReprPCWk	EPHB2	chr1	23236800	23241818	13_ReprPC	EPHB2
chr1	23430000	23430200	11_EnhWk	LUZP1	chr1	23430000	23430200	10_EnhA2	LUZP1
chr1	23441200	23448800	15_NA	LUZP1	chr1	23441600	23446200	6_TxWk	LUZP1
chr1	23474400	23493200	15_NA	LUZP1	chr1	23475600	23492600	6_TxWk	LUZP1
chr1	23498600	23503800	15_NA	LUZP1	chr1	23498200	23503800	6_TxWk	LUZP1
chr1	23516993	23519600	6_TxWk	HTR1D	chr1	23517200	23520200	14_ReprPCWk	HTR1D
chr1	23665200	23666600	6_TxWk	HNRNPR	chr1	23665600	23667200	7_EnhG1	HNRNPR
chr1	23693400	23693800	6_TxWk	ZNF436	chr1	23693200	23693800	8_EnhG2	ZNF436
chr1	23693800	23694400	2_TssFlnk	ZNF436	chr1	23693800	23694200	4_TssFlnkD	ZNF436
chr1	23697400	23698332	6_TxWk	ZNF436-AS1	chr1	23697400	23698200	11_EnhWk	C1orf213
chr1	23715400	23719200	15_NA	TCEA3	chr1	23714400	23718200	14_ReprPCWk	TCEA3
chr1	23719200	23720200	6_TxWk	TCEA3	chr1	23718800	23720000	14_ReprPCWk	TCEA3
chr1	23730400	23731000	11_EnhWk	TCEA3	chr1	23730600	23731000	9_EnhA1	TCEA3
chr1	23767800	23771600	6_TxWk	ASAP3	chr1	23767400	23770200	14_ReprPCWk	ASAP3
chr1	23851800	23852400	9_EnhA1	E2F2	chr1	23851800	23852600	11_EnhWk	E2F2
chr1	23857200	23857600	1_TssA	E2F2	chr1	23857000	23857600	4_TssFlnkD	E2F2
chr1	23909000	23910000	2_TssFlnk	MDS2	chr1	23909400	23910400	1_TssA	MDS2
chr1	24071800	24073400	6_TxWk	ELOA	chr1	24072000	24073200	7_EnhG1	TCEB3
chr1	24106800	24107000	8_EnhG2	PITHD1	chr1	24106800	24107000	9_EnhA1	PITHD1
chr1	24119400	24119600	6_TxWk	LYPLA2	chr1	24119400	24119600	8_EnhG2	LYPLA2
chr1	24126000	24126400	2_TssFlnk	GALE	chr1	24126000	24126600	3_TssFlnkU	GALE
chr1	24128375	24128400	6_TxWk	HMGCL	chr1	24128375	24128400	11_EnhWk	HMGCL
chr1	24150600	24151200	2_TssFlnk	HMGCL	chr1	24150800	24151400	4_TssFlnkD	HMGCL
chr1	24172600	24181200	6_TxWk	FUCA1	chr1	24175000	24182400	14_ReprPCWk	FUCA1
chr1	24191600	24192000	9_EnhA1	FUCA1	chr1	24191600	24192200	11_EnhWk	FUCA1
chr1	24192000	24192600	11_EnhWk	FUCA1	chr1	24192200	24192800	12_TssBiv	FUCA1
chr1	24192600	24194000	14_ReprPCWk	FUCA1	chr1	24192800	24194200	13_ReprPC	FUCA1
chr1	24257200	24257600	10_EnhA2	CNR2	chr1	24257200	24257600	9_EnhA1	CNR2
chr1	24289200	24289952	7_EnhG1	PNRC2	chr1	24289000	24289952	5_Tx	PNRC2
chr1	24435800	24438000	6_TxWk	MYOM3	chr1	24435800	24437600	14_ReprPCWk	MYOM3
chr1	24446261	24447800	14_ReprPCWk	IL22RA1	chr1	24446261	24448800	13_ReprPC	IL22RA1
chr1	24648000	24649200	12_TssBiv	GRHL3	chr1	24648400	24649200	4_TssFlnkD	GRHL3
chr1	24735600	24736600	11_EnhWk	STPG1	chr1	24735200	24736600	6_TxWk	STPG1
chr1	24739400	24739800	2_TssFlnk	STPG1	chr1	24739400	24739800	4_TssFlnkD	STPG1
chr1	24742284	24742400	1_TssA	NIPAL3	chr1	24742284	24742400	2_TssFlnk	NIPAL3
chr1	24745400	24745800	10_EnhA2	NIPAL3	chr1	24745400	24745800	6_TxWk	NIPAL3
chr1	24773200	24775200	5_Tx	NIPAL3	chr1	24772400	24775400	6_TxWk	NIPAL3
chr1	24797400	24799466	14_ReprPCWk	NIPAL3	chr1	24796400	24799466	15_NA	NIPAL3
chr1	24830600	24857800	6_TxWk	RCAN3	chr1	24830400	24857400	15_NA	RCAN3
chr1	25097800	25098400	7_EnhG1	CLIC4	chr1	25098000	25098400	9_EnhA1	CLIC4
chr1	25098400	25099000	5_Tx	CLIC4	chr1	25098400	25099200	11_EnhWk	CLIC4
chr1	25100200	25102200	5_Tx	CLIC4	chr1	25100400	25101600	7_EnhG1	CLIC4
chr1	25102800	25103400	5_Tx	CLIC4	chr1	25102800	25103800	7_EnhG1	CLIC4
chr1	25109400	25111200	5_Tx	CLIC4	chr1	25109800	25111000	6_TxWk	CLIC4
chr1	25130800	25132000	6_TxWk	CLIC4	chr1	25130200	25131800	11_EnhWk	CLIC4
chr1	25227000	25232800	14_ReprPCWk	RUNX3	chr1	25226002	25233200	13_ReprPC	RUNX3
chr1	25232800	25240400	15_NA	RUNX3	chr1	25233200	25238200	14_ReprPCWk	RUNX3
chr1	25242200	25246000	6_TxWk	RUNX3	chr1	25242000	25245200	14_ReprPCWk	RUNX3
chr1	25246000	25246600	11_EnhWk	RUNX3	chr1	25245800	25246400	14_ReprPCWk	RUNX3
chr1	25557800	25558000	8_EnhG2	SYF2	chr1	25557800	25558000	7_EnhG1	SYF2
chr1	25558000	25558400	2_TssFlnk	SYF2	chr1	25558000	25558400	8_EnhG2	SYF2
chr1	25574600	25574800	2_TssFlnk	RSRP1	chr1	25574600	25574800	4_TssFlnkD	C1orf63
chr1	25586200	25587200	10_EnhA2	RSRP1	chr1	25586200	25587800	11_EnhWk	C1orf63
chr1	25657400	25662800	15_NA	RSRP1	chr1	25657800	25661600	6_TxWk	C1orf63
chr1	25688740	25690800	5_Tx	RHCE	chr1	25688740	25690200	7_EnhG1	RHCE
chr1	25758800	25759400	2_TssFlnk	MACO1	chr1	25758600	25759400	4_TssFlnkD	TMEM57
chr1	25759400	25760000	6_TxWk	MACO1	chr1	25759400	25760000	11_EnhWk	TMEM57
chr1	25760000	25760800	2_TssFlnk	MACO1	chr1	25760000	25760800	4_TssFlnkD	TMEM57
chr1	25760800	25762800	6_TxWk	MACO1	chr1	25760800	25763600	11_EnhWk	TMEM57
chr1	26022800	26023400	13_ReprPC	MAN1C1	chr1	26022600	26023200	11_EnhWk	MAN1C1
chr1	26033800	26042000	14_ReprPCWk	MAN1C1	chr1	26033200	26039000	11_EnhWk	MAN1C1
chr1	26054600	26056600	14_ReprPCWk	MAN1C1	chr1	26055000	26056400	13_ReprPC	MAN1C1
chr1	26063600	26068000	14_ReprPCWk	MAN1C1	chr1	26064200	26069400	13_ReprPC	MAN1C1
chr1	26175400	26175600	10_EnhA2	AUNIP	chr1	26175400	26175600	11_EnhWk	AUNIP
chr1	26175600	26182400	15_NA	AUNIP	chr1	26175600	26184800	6_TxWk	AUNIP
chr1	26323200	26323400	11_EnhWk	PAFAH2	chr1	26323200	26323400	9_EnhA1	PAFAH2
chr1	26346375	26348000	11_EnhWk	EXTL1	chr1	26346375	26347600	9_EnhA1	EXTL1
chr1	26350000	26351000	13_ReprPC	EXTL1	chr1	26349600	26350800	14_ReprPCWk	EXTL1
chr1	26359600	26360600	14_ReprPCWk	EXTL1	chr1	26359600	26361200	13_ReprPC	EXTL1
chr1	26439000	26439400	2_TssFlnk	PDIK1L	chr1	26439000	26439600	4_TssFlnkD	PDIK1L
chr1	26496800	26497400	2_TssFlnk	ZNF593	chr1	26496800	26497400	4_TssFlnkD	ZNF593
chr1	26611800	26613000	6_TxWk	UBXN11	chr1	26612200	26613400	11_EnhWk	UBXN11
chr1	26641800	26642200	14_ReprPCWk	UBXN11	chr1	26641800	26642400	11_EnhWk	UBXN11
chr1	26642400	26644854	6_TxWk	UBXN11	chr1	26642400	26644854	15_NA	UBXN11
chr1	26644448	26647014	6_TxWk	CD52	chr1	26644448	26647014	15_NA	CD52
chr1	26676200	26677400	11_EnhWk	CRYBG2	chr1	26676200	26677800	6_TxWk	AIM1L
chr1	26698800	26701000	11_EnhWk	ZNF683	chr1	26697600	26701013	14_ReprPCWk	ZNF683
chr1	26760000	26760400	6_TxWk	DHDDS	chr1	26760000	26760400	7_EnhG1	DHDDS
chr1	27025200	27026400	2_TssFlnk	ARID1A	chr1	27025000	27026200	4_TssFlnkD	ARID1A
chr1	27026600	27028400	11_EnhWk	ARID1A	chr1	27026600	27029400	7_EnhG1	ARID1A
chr1	27033000	27033200	3_TssFlnkU	ARID1A	chr1	27033000	27033200	11_EnhWk	ARID1A
chr1	27033600	27035200	6_TxWk	ARID1A	chr1	27033400	27034800	11_EnhWk	ARID1A
chr1	27070000	27070800	6_TxWk	ARID1A	chr1	27070200	27071200	9_EnhA1	ARID1A
chr1	27124200	27124889	6_TxWk	PIGV	chr1	27124200	27124889	11_EnhWk	PIGV
chr1	27217000	27217400	2_TssFlnk	GPATCH3	chr1	27217000	27217400	4_TssFlnkD	GPATCH3
chr1	27249000	27249600	4_TssFlnkD	NUDC	chr1	27249200	27249800	8_EnhG2	NUDC
chr1	27266400	27267400	10_EnhA2	NUDC	chr1	27266200	27267200	7_EnhG1	NUDC
chr1	27278600	27284800	14_ReprPCWk	KDF1	chr1	27280800	27286400	13_ReprPC	C1orf172
chr1	27331600	27332600	6_TxWk	TENT5B	chr1	27332000	27332800	7_EnhG1	FAM46B
chr1	27427000	27427400	6_TxWk	SLC9A1	chr1	27427000	27427400	7_EnhG1	SLC9A1
chr1	27439200	27439600	6_TxWk	SLC9A1	chr1	27439200	27439800	7_EnhG1	SLC9A1
chr1	27446600	27448800	6_TxWk	SLC9A1	chr1	27447000	27448800	11_EnhWk	SLC9A1
chr1	27448800	27449400	11_EnhWk	SLC9A1	chr1	27448800	27449200	9_EnhA1	SLC9A1
chr1	27462600	27465400	6_TxWk	SLC9A1	chr1	27462400	27466200	7_EnhG1	SLC9A1
chr1	27478800	27479400	4_TssFlnkD	SLC9A1	chr1	27478600	27479200	8_EnhG2	SLC9A1
chr1	27613800	27617600	5_Tx	WDTC1	chr1	27614600	27618600	6_TxWk	WDTC1
chr1	27668513	27674400	15_NA	SYTL1	chr1	27669000	27676000	14_ReprPCWk	SYTL1
chr1	27676000	27676600	12_TssBiv	SYTL1	chr1	27676000	27676400	2_TssFlnk	SYTL1
chr1	27691200	27691400	6_TxWk	MAP3K6	chr1	27691200	27691400	7_EnhG1	MAP3K6
chr1	27691400	27691600	2_TssFlnk	MAP3K6	chr1	27691400	27691600	8_EnhG2	MAP3K6
chr1	27762800	27763600	9_EnhA1	WASF2	chr1	27762800	27764000	3_TssFlnkU	WASF2
chr1	27763600	27765800	11_EnhWk	WASF2	chr1	27764000	27766200	7_EnhG1	WASF2
chr1	27765800	27767600	6_TxWk	WASF2	chr1	27766200	27768200	5_Tx	WASF2
chr1	27772200	27773800	6_TxWk	WASF2	chr1	27771800	27773200	11_EnhWk	WASF2
chr1	27808400	27810400	6_TxWk	WASF2	chr1	27808400	27810000	7_EnhG1	WASF2
chr1	27890600	27892000	8_EnhG2	AHDC1	chr1	27890600	27892000	3_TssFlnkU	AHDC1
chr1	27901800	27902000	1_TssA	AHDC1	chr1	27901800	27902000	3_TssFlnkU	AHDC1
chr1	27996200	27997200	6_TxWk	IFI6	chr1	27996400	27997400	11_EnhWk	IFI6
chr1	27997200	27998400	2_TssFlnk	IFI6	chr1	27997400	27998400	4_TssFlnkD	IFI6
chr1	28084400	28088600	5_Tx	FAM76A	chr1	28083600	28089633	6_TxWk	FAM76A
chr1	28100800	28101400	2_TssFlnk	STX12	chr1	28100600	28101400	4_TssFlnkD	STX12
chr1	28101400	28102200	6_TxWk	STX12	chr1	28101400	28102000	11_EnhWk	STX12
chr1	28159200	28159400	8_EnhG2	PPP1R8	chr1	28159200	28159400	11_EnhWk	PPP1R8
chr1	28199055	28200000	2_TssFlnk	THEMIS2	chr1	28199200	28200000	4_TssFlnkD	THEMIS2
chr1	28201400	28202000	10_EnhA2	THEMIS2	chr1	28201200	28202000	11_EnhWk	THEMIS2
chr1	28392200	28404600	6_TxWk	EYA3	chr1	28393800	28401600	15_NA	EYA3
chr1	28413600	28414000	11_EnhWk	EYA3	chr1	28413600	28414200	4_TssFlnkD	EYA3
chr1	28476000	28487800	15_NA	PTAFR	chr1	28479600	28487000	14_ReprPCWk	PTAFR
chr1	28558400	28558800	2_TssFlnk	DNAJC8	chr1	28558400	28559000	4_TssFlnkD	DNAJC8
chr1	28573400	28573417	2_TssFlnk	ATP5IF1	chr1	28573400	28573417	1_TssA	ATPIF1
chr1	28655800	28656600	2_TssFlnk	MED18	chr1	28656000	28656600	4_TssFlnkD	MED18
chr1	28765600	28766600	2_TssFlnk	PHACTR4	chr1	28765600	28766400	4_TssFlnkD	PHACTR4
chr1	28777600	28780800	5_Tx	PHACTR4	chr1	28778400	28781800	6_TxWk	PHACTR4
chr1	28837000	28841000	5_Tx	RCC1	chr1	28837000	28842000	7_EnhG1	RCC1
chr1	28844200	28844400	4_TssFlnkD	RCC1	chr1	28844200	28844400	2_TssFlnk	RCC1
chr1	28864200	28865400	7_EnhG1	RCC1	chr1	28864600	28865812	5_Tx	RCC1
chr1	28880600	28881200	6_TxWk	TRNAU1AP	chr1	28880600	28881000	8_EnhG2	TRNAU1AP
chr1	28929000	28929800	6_TxWk	TAF12	chr1	28929000	28929600	7_EnhG1	TAF12
chr1	29261200	29287800	14_ReprPCWk	EPB41	chr1	29261600	29279600	15_NA	EPB41
chr1	29346000	29354400	14_ReprPCWk	EPB41	chr1	29342000	29352600	15_NA	EPB41
chr1	29358400	29368800	14_ReprPCWk	EPB41	chr1	29359400	29369000	15_NA	EPB41
chr1	29413600	29416800	13_ReprPC	EPB41	chr1	29413400	29415600	14_ReprPCWk	EPB41
chr1	29450200	29450447	12_TssBiv	TMEM200B	chr1	29450200	29450447	2_TssFlnk	TMEM200B
chr1	29488600	29489600	7_EnhG1	SRSF4	chr1	29489000	29489600	8_EnhG2	SRSF4
chr1	29504000	29505800	5_Tx	SRSF4	chr1	29504600	29505800	7_EnhG1	SRSF4
chr1	29528600	29529400	9_EnhA1	MECR	chr1	29528400	29529400	7_EnhG1	MECR
chr1	29529400	29529800	11_EnhWk	MECR	chr1	29529400	29529800	6_TxWk	MECR
chr1	29556400	29557000	2_TssFlnk	MECR	chr1	29556200	29557200	4_TssFlnkD	MECR
chr1	29567200	29570200	6_TxWk	PTPRU	chr1	29566000	29569800	14_ReprPCWk	PTPRU
chr1	29575400	29576000	11_EnhWk	PTPRU	chr1	29575200	29576000	14_ReprPCWk	PTPRU
chr1	29576000	29576600	9_EnhA1	PTPRU	chr1	29576000	29576800	11_EnhWk	PTPRU
chr1	29584200	29586200	6_TxWk	PTPRU	chr1	29583200	29586000	11_EnhWk	PTPRU
chr1	29597400	29598400	9_EnhA1	PTPRU	chr1	29597200	29598000	11_EnhWk	PTPRU
chr1	31186800	31190600	6_TxWk	MATN1	chr1	31186000	31190600	14_ReprPCWk	MATN1
chr1	31191600	31192200	1_TssA	MATN1	chr1	31191600	31192000	3_TssFlnkU	MATN1
chr1	31192200	31192600	2_TssFlnk	MATN1	chr1	31192200	31192600	4_TssFlnkD	MATN1
chr1	31192600	31196434	15_NA	MATN1	chr1	31192800	31196434	14_ReprPCWk	MATN1
chr1	31205316	31206400	9_EnhA1	LAPTM5	chr1	31205400	31207000	11_EnhWk	LAPTM5
chr1	31206800	31213800	6_TxWk	LAPTM5	chr1	31207000	31214200	14_ReprPCWk	LAPTM5
chr1	31356800	31358400	6_TxWk	SDC3	chr1	31356800	31358600	13_ReprPC	SDC3
chr1	31358400	31360400	11_EnhWk	SDC3	chr1	31358600	31360600	14_ReprPCWk	SDC3
chr1	31362200	31380000	6_TxWk	SDC3	chr1	31365800	31379200	14_ReprPCWk	SDC3
chr1	31448000	31449200	6_TxWk	PUM1	chr1	31448000	31449200	11_EnhWk	PUM1
chr1	31457400	31458800	5_Tx	PUM1	chr1	31457000	31459000	11_EnhWk	PUM1
chr1	31479800	31480000	7_EnhG1	PUM1	chr1	31479800	31480000	11_EnhWk	PUM1
chr1	31511600	31514200	6_TxWk	PUM1	chr1	31510800	31513600	11_EnhWk	PUM1
chr1	31520400	31522800	6_TxWk	PUM1	chr1	31521000	31522600	5_Tx	PUM1
chr1	31535600	31536800	2_TssFlnk	PUM1	chr1	31535800	31536600	4_TssFlnkD	PUM1
chr1	31652592	31654400	14_ReprPCWk	NKAIN1	chr1	31652592	31654200	13_ReprPC	NKAIN1
chr1	31654400	31655400	2_TssFlnk	NKAIN1	chr1	31654600	31655400	4_TssFlnkD	NKAIN1
chr1	31680200	31683600	14_ReprPCWk	NKAIN1	chr1	31680600	31682800	13_ReprPC	NKAIN1
chr1	31768400	31769200	2_TssFlnk	SNRNP40	chr1	31768400	31769000	4_TssFlnkD	SNRNP40
chr1	31838472	31842200	5_Tx	FABP3	chr1	31838472	31844200	6_TxWk	FABP3
chr1	31893600	31895600	9_EnhA1	SERINC2	chr1	31893800	31896200	11_EnhWk	SERINC2
chr1	31905800	31907525	5_Tx	SERINC2	chr1	31905000	31907525	14_ReprPCWk	SERINC2
chr1	32050200	32053288	14_ReprPCWk	TINAGL1	chr1	32050000	32053288	6_TxWk	TINAGL1
chr1	32138400	32139600	11_EnhWk	COL16A1	chr1	32138400	32140200	7_EnhG1	COL16A1
chr1	32155000	32155600	11_EnhWk	COL16A1	chr1	32154800	32155600	7_EnhG1	COL16A1
chr1	32226200	32226800	2_TssFlnk	ADGRB2	chr1	32226200	32227000	4_TssFlnkD	BAI2
chr1	32256023	32263000	6_TxWk	SPOCD1	chr1	32256600	32261400	5_Tx	SPOCD1
chr1	32263000	32264200	2_TssFlnk	SPOCD1	chr1	32263200	32264600	3_TssFlnkU	SPOCD1
chr1	32268000	32268600	2_TssFlnk	SPOCD1	chr1	32268200	32268600	1_TssA	SPOCD1
chr1	32538800	32539800	2_TssFlnk	TMEM39B	chr1	32539200	32539800	4_TssFlnkD	TMEM39B
chr1	32566200	32567600	11_EnhWk	TMEM39B	chr1	32566000	32567600	7_EnhG1	TMEM39B
chr1	32670600	32670800	2_TssFlnk	CCDC28B	chr1	32670600	32670800	11_EnhWk	CCDC28B
chr1	32670800	32670988	1_TssA	CCDC28B	chr1	32670800	32670988	4_TssFlnkD	CCDC28B
chr1	32671600	32672200	2_TssFlnk	IQCC	chr1	32671600	32672000	4_TssFlnkD	IQCC
chr1	32799433	32800000	5_Tx	MARCKSL1	chr1	32799433	32800000	6_TxWk	MARCKSL1
chr1	32800400	32800800	2_TssFlnk	MARCKSL1	chr1	32800400	32801000	12_TssBiv	MARCKSL1
chr1	32800800	32801600	1_TssA	MARCKSL1	chr1	32801000	32801980	2_TssFlnk	MARCKSL1
chr1	32859400	32860332	1_TssA	BSDC1	chr1	32859600	32860332	2_TssFlnk	BSDC1
chr1	33102600	33102800	9_EnhA1	ZBTB8OS	chr1	33102600	33102800	8_EnhG2	ZBTB8OS
chr1	33102800	33103600	11_EnhWk	ZBTB8OS	chr1	33102800	33103400	7_EnhG1	ZBTB8OS
chr1	33166800	33167400	4_TssFlnkD	SYNC	chr1	33167000	33167600	3_TssFlnkU	SYNC
chr1	33208800	33219000	6_TxWk	KIAA1522	chr1	33208800	33215000	15_NA	KIAA1522
chr1	33222800	33226800	6_TxWk	KIAA1522	chr1	33221600	33225600	14_ReprPCWk	KIAA1522
chr1	33284200	33284400	4_TssFlnkD	S100PBP	chr1	33284200	33284400	2_TssFlnk	S100PBP
chr1	33284400	33284600	2_TssFlnk	S100PBP	chr1	33284400	33284600	4_TssFlnkD	S100PBP
chr1	33335600	33337600	2_TssFlnk	FNDC5	chr1	33334800	33337800	12_TssBiv	FNDC5
chr1	33366200	33366800	2_TssFlnk	TMEM54	chr1	33366000	33366800	12_TssBiv	TMEM54
chr1	33366800	33367039	12_TssBiv	TMEM54	chr1	33366800	33367039	2_TssFlnk	TMEM54
chr1	33413600	33414800	10_EnhA2	RNF19B	chr1	33413200	33414600	6_TxWk	RNF19B
chr1	33428000	33429600	2_TssFlnk	RNF19B	chr1	33427800	33429400	4_TssFlnkD	RNF19B
chr1	33439268	33439642	15_NA	FKSG48	chr1	33439268	33439600	11_EnhWk	FKSG48
chr1	33491400	33494600	6_TxWk	AK2	chr1	33492000	33496000	5_Tx	AK2
chr1	33501000	33501800	2_TssFlnk	AK2	chr1	33501200	33501800	4_TssFlnkD	AK2
chr1	33504400	33508400	14_ReprPCWk	AK2	chr1	33503000	33508800	15_NA	AK2
chr1	33508600	33510000	9_EnhA1	AK2	chr1	33508800	33510200	11_EnhWk	AK2
chr1	33515400	33516600	9_EnhA1	AK2	chr1	33515800	33516600	11_EnhWk	AK2
chr1	33516600	33516800	10_EnhA2	AK2	chr1	33516600	33516800	2_TssFlnk	AK2
chr1	33521400	33525600	6_TxWk	AK2	chr1	33521400	33525400	14_ReprPCWk	AK2
chr1	33525800	33527200	9_EnhA1	AK2	chr1	33525400	33527000	11_EnhWk	AK2
chr1	33529400	33534600	15_NA	AK2	chr1	33527000	33534800	14_ReprPCWk	AK2
chr1	33629400	33630000	5_Tx	TRIM62	chr1	33629400	33629800	11_EnhWk	TRIM62
chr1	33723800	33724000	2_TssFlnk	ZNF362	chr1	33723800	33724000	4_TssFlnkD	ZNF362
chr1	33724000	33724200	11_EnhWk	ZNF362	chr1	33724000	33724200	8_EnhG2	ZNF362
chr1	33772367	33773400	14_ReprPCWk	A3GALT2	chr1	33772367	33773000	12_TssBiv	A3GALT2
chr1	33815800	33816600	4_TssFlnkD	PHC2	chr1	33815800	33816400	3_TssFlnkU	PHC2
chr1	33849000	33849400	10_EnhA2	PHC2	chr1	33849000	33849400	11_EnhWk	PHC2
chr1	33866400	33875600	6_TxWk	PHC2	chr1	33868400	33874200	5_Tx	PHC2
chr1	33887600	33889800	6_TxWk	PHC2	chr1	33886600	33889800	7_EnhG1	PHC2
chr1	33889800	33890000	11_EnhWk	PHC2	chr1	33889800	33890000	9_EnhA1	PHC2
chr1	33890000	33890600	9_EnhA1	PHC2	chr1	33890000	33890400	3_TssFlnkU	PHC2
chr1	33891600	33893000	6_TxWk	PHC2	chr1	33891200	33893000	5_Tx	PHC2
chr1	33938600	33939400	2_TssFlnk	ZSCAN20	chr1	33938800	33939600	4_TssFlnkD	ZSCAN20
chr1	34326076	34330392	15_NA	HMGB4	chr1	34326076	34330392	14_ReprPCWk	HMGB4
chr1	35323800	35324800	2_TssFlnk	SMIM12	chr1	35323800	35324600	4_TssFlnkD	SMIM12
chr1	35331600	35332400	2_TssFlnk	DLGAP3	chr1	35331200	35332400	12_TssBiv	DLGAP3
chr1	35735600	35736200	2_TssFlnk	ZMYM4	chr1	35735600	35736000	4_TssFlnkD	ZMYM4
chr1	35752200	35753200	10_EnhA2	ZMYM4	chr1	35751800	35752800	6_TxWk	ZMYM4
chr1	35783000	35784800	6_TxWk	ZMYM4	chr1	35782000	35784800	5_Tx	ZMYM4
chr1	35784800	35789000	5_Tx	ZMYM4	chr1	35784800	35789600	6_TxWk	ZMYM4
chr1	35835600	35836400	10_EnhA2	ZMYM4	chr1	35835400	35836400	9_EnhA1	ZMYM4
chr1	36003800	36004400	10_EnhA2	KIAA0319L	chr1	36003400	36004400	7_EnhG1	KIAA0319L
chr1	36025400	36025800	5_Tx	NCDN	chr1	36025200	36025800	6_TxWk	NCDN
chr1	36026200	36027000	8_EnhG2	NCDN	chr1	36025800	36026800	7_EnhG1	NCDN
chr1	36040000	36042400	14_ReprPCWk	TFAP2E	chr1	36039800	36043400	13_ReprPC	TFAP2E
chr1	36044800	36056600	6_TxWk	TFAP2E	chr1	36045000	36053200	15_NA	TFAP2E
chr1	36103800	36104000	1_TssA	PSMB2	chr1	36103800	36104000	3_TssFlnkU	PSMB2
chr1	36104000	36104200	10_EnhA2	PSMB2	chr1	36104000	36104200	8_EnhG2	PSMB2
chr1	36104200	36105800	6_TxWk	PSMB2	chr1	36104200	36105800	7_EnhG1	PSMB2
chr1	36185000	36185073	2_TssFlnk	C1orf216	chr1	36185000	36185073	4_TssFlnkD	C1orf216
chr1	36234200	36234600	2_TssFlnk	CLSPN	chr1	36234200	36234800	4_TssFlnkD	CLSPN
chr1	36274600	36275600	2_TssFlnk	AGO4	chr1	36274400	36275600	4_TssFlnkD	00:00:00
chr1	36397400	36398000	2_TssFlnk	AGO4	chr1	36397400	36398000	4_TssFlnkD	00:00:00
chr1	36496200	36497000	5_Tx	AGO4	chr1	36495800	36496800	6_TxWk	00:00:00
chr1	36497000	36498000	6_TxWk	AGO4	chr1	36496800	36498400	5_Tx	00:00:00
chr1	36555800	36556000	7_EnhG1	ADPRHL2	chr1	36555800	36556000	4_TssFlnkD	ADPRHL2
chr1	36566000	36573600	6_TxWk	COL8A2	chr1	36566000	36573800	15_NA	COL8A2
chr1	36581600	36584600	6_TxWk	COL8A2	chr1	36582400	36584400	14_ReprPCWk	COL8A2
chr1	36613000	36613600	6_TxWk	TRAPPC3	chr1	36612800	36613600	7_EnhG1	TRAPPC3
chr1	36717000	36719800	6_TxWk	THRAP3	chr1	36717000	36719200	11_EnhWk	THRAP3
chr1	36720400	36722000	6_TxWk	THRAP3	chr1	36720800	36722600	5_Tx	THRAP3
chr1	36730800	36732000	6_TxWk	THRAP3	chr1	36730200	36731800	5_Tx	THRAP3
chr1	36771988	36772000	7_EnhG1	SH3D21	chr1	36771988	36772000	5_Tx	SH3D21
chr1	36772400	36773400	2_TssFlnk	SH3D21	chr1	36772000	36773000	4_TssFlnkD	SH3D21
chr1	36773400	36773600	8_EnhG2	SH3D21	chr1	36773400	36773600	4_TssFlnkD	SH3D21
chr1	36814800	36815400	11_EnhWk	STK40	chr1	36815000	36815400	7_EnhG1	STK40
chr1	36832400	36833000	6_TxWk	STK40	chr1	36832400	36833000	10_EnhA2	STK40
chr1	36841000	36842600	6_TxWk	STK40	chr1	36841200	36842800	7_EnhG1	STK40
chr1	36931644	36936800	15_NA	CSF3R	chr1	36931644	36936400	14_ReprPCWk	CSF3R
chr1	36936800	36940600	14_ReprPCWk	CSF3R	chr1	36936400	36941800	13_ReprPC	CSF3R
chr1	37978800	37979000	6_TxWk	MEAF6	chr1	37978800	37979000	5_Tx	MEAF6
chr1	38018200	38018400	11_EnhWk	SNIP1	chr1	38018200	38018400	7_EnhG1	SNIP1
chr1	38022600	38022800	1_TssA	DNALI1	chr1	38022520	38022800	2_TssFlnk	DNALI1
chr1	38022800	38023200	2_TssFlnk	DNALI1	chr1	38022800	38023200	4_TssFlnkD	DNALI1
chr1	38059600	38059800	6_TxWk	GNL2	chr1	38059600	38059800	7_EnhG1	GNL2
chr1	38154600	38154800	11_EnhWk	C1orf109	chr1	38154600	38154800	7_EnhG1	C1orf109
chr1	38157200	38157800	2_TssFlnk	C1orf109	chr1	38157400	38157914	1_TssA	C1orf109
chr1	38226400	38229800	14_ReprPCWk	EPHA10	chr1	38227200	38230805	13_ReprPC	EPHA10
chr1	38274800	38275126	3_TssFlnkU	C1orf122	chr1	38274800	38275126	8_EnhG2	C1orf122
chr1	38397800	38398400	11_EnhWk	INPP5B	chr1	38397800	38398400	4_TssFlnkD	INPP5B
chr1	38398400	38398600	9_EnhA1	INPP5B	chr1	38398400	38398600	11_EnhWk	INPP5B
chr1	38398600	38399000	10_EnhA2	INPP5B	chr1	38398600	38399200	9_EnhA1	INPP5B
chr1	38454000	38454600	6_TxWk	SF3A3	chr1	38454000	38454400	7_EnhG1	SF3A3
chr1	38479400	38480000	2_TssFlnk	UTP11	chr1	38479400	38480000	8_EnhG2	UTP11L
chr1	38480000	38481400	6_TxWk	UTP11	chr1	38480000	38482000	7_EnhG1	UTP11L
chr1	38509800	38510800	12_TssBiv	POU3F1	chr1	38510200	38511200	13_ReprPC	POU3F1
chr1	38510800	38512200	13_ReprPC	POU3F1	chr1	38511200	38512450	12_TssBiv	POU3F1
chr1	39458000	39458800	2_TssFlnk	AKIRIN1	chr1	39458200	39458800	4_TssFlnkD	AKIRIN1
chr1	39568800	39570000	9_EnhA1	MACF1	chr1	39569200	39570000	11_EnhWk	MACF1
chr1	39577000	39578200	6_TxWk	MACF1	chr1	39577000	39578800	11_EnhWk	MACF1
chr1	39623800	39624400	3_TssFlnkU	MACF1	chr1	39623800	39624600	4_TssFlnkD	MACF1
chr1	39642400	39643000	9_EnhA1	MACF1	chr1	39642200	39642800	10_EnhA2	MACF1
chr1	39734600	39735600	7_EnhG1	MACF1	chr1	39734800	39735800	9_EnhA1	MACF1
chr1	39959000	39959800	11_EnhWk	BMP8A	chr1	39959200	39959800	12_TssBiv	BMP8A
chr1	39962800	39974000	15_NA	BMP8A	chr1	39965400	39973800	14_ReprPCWk	BMP8A
chr1	40098200	40098400	3_TssFlnkU	HEYL	chr1	40098200	40098400	8_EnhG2	HEYL
chr1	40098400	40099000	1_TssA	HEYL	chr1	40098400	40099400	4_TssFlnkD	HEYL
chr1	40144320	40145200	6_TxWk	HPCAL4	chr1	40144320	40145400	14_ReprPCWk	HPCAL4
chr1	40205000	40205400	2_TssFlnk	PPIE	chr1	40205000	40205600	4_TssFlnkD	PPIE
chr1	40205600	40206200	11_EnhWk	PPIE	chr1	40205800	40206400	6_TxWk	PPIE
chr1	40235195	40235800	14_ReprPCWk	OXCT2	chr1	40235195	40235800	13_ReprPC	OXCT2
chr1	40241400	40243000	11_EnhWk	BMP8B	chr1	40241600	40242800	12_TssBiv	BMP8B
chr1	40252800	40254400	13_ReprPC	BMP8B	chr1	40252400	40254533	12_TssBiv	BMP8B
chr1	40310600	40311200	11_EnhWk	TRIT1	chr1	40310600	40311600	7_EnhG1	TRIT1
chr1	40628600	40629600	2_TssFlnk	RLF	chr1	40628800	40629400	4_TssFlnkD	RLF
chr1	40651600	40653200	10_EnhA2	RLF	chr1	40651400	40653600	11_EnhWk	RLF
chr1	40706200	40706593	6_TxWk	RLF	chr1	40706200	40706593	11_EnhWk	RLF
chr1	40766159	40767000	6_TxWk	COL9A2	chr1	40766159	40767400	14_ReprPCWk	COL9A2
chr1	40771200	40779800	15_NA	COL9A2	chr1	40770600	40778600	14_ReprPCWk	COL9A2
chr1	40842400	40844000	6_TxWk	SMAP2	chr1	40842200	40843400	11_EnhWk	SMAP2
chr1	40844600	40845400	6_TxWk	SMAP2	chr1	40844600	40845400	7_EnhG1	SMAP2
chr1	40845400	40846000	2_TssFlnk	SMAP2	chr1	40845400	40845800	9_EnhA1	SMAP2
chr1	40846000	40849800	6_TxWk	SMAP2	chr1	40845800	40849400	11_EnhWk	SMAP2
chr1	40997233	40997600	2_TssFlnk	ZNF684	chr1	40997233	40997600	1_TssA	ZNF684
chr1	41169600	41174200	15_NA	NFYC	chr1	41169600	41174000	6_TxWk	NFYC
chr1	41174600	41176600	1_TssA	NFYC	chr1	41175400	41177400	4_TssFlnkD	NFYC
chr1	41177600	41178200	11_EnhWk	NFYC	chr1	41177600	41178600	6_TxWk	NFYC
chr1	41216000	41216800	10_EnhA2	NFYC	chr1	41216000	41216800	11_EnhWk	NFYC
chr1	41226400	41227400	10_EnhA2	NFYC	chr1	41226400	41227400	11_EnhWk	NFYC
chr1	41249684	41251400	2_TssFlnk	KCNQ4	chr1	41249684	41251000	12_TssBiv	KCNQ4
chr1	41265400	41267600	14_ReprPCWk	KCNQ4	chr1	41266000	41267400	13_ReprPC	KCNQ4
chr1	41273200	41281000	14_ReprPCWk	KCNQ4	chr1	41274000	41279400	13_ReprPC	KCNQ4
chr1	41281000	41286600	15_NA	KCNQ4	chr1	41281000	41285600	13_ReprPC	KCNQ4
chr1	41287600	41290200	6_TxWk	KCNQ4	chr1	41286800	41290000	14_ReprPCWk	KCNQ4
chr1	41326729	41328018	2_TssFlnk	CITED4	chr1	41326729	41328000	4_TssFlnkD	CITED4
chr1	41447200	41448600	6_TxWk	CTPS1	chr1	41447000	41448200	11_EnhWk	CTPS1
chr1	41654400	41669400	15_NA	SCMH1	chr1	41652200	41670800	6_TxWk	SCMH1
chr1	41829400	41831600	14_ReprPCWk	FOXO6	chr1	41829200	41831000	13_ReprPC	FOXO6
chr1	41845600	41847000	6_TxWk	FOXO6	chr1	41845600	41846800	13_ReprPC	FOXO6
chr1	41975600	41979400	5_Tx	HIVEP3	chr1	41974800	41980800	6_TxWk	HIVEP3
chr1	41982000	41982400	2_TssFlnk	HIVEP3	chr1	41982000	41982400	4_TssFlnkD	HIVEP3
chr1	42004000	42020000	6_TxWk	HIVEP3	chr1	42006600	42021000	15_NA	HIVEP3
chr1	42054200	42078400	6_TxWk	HIVEP3	chr1	42047200	42073800	15_NA	HIVEP3
chr1	42104600	42105800	9_EnhA1	HIVEP3	chr1	42104400	42105800	11_EnhWk	HIVEP3
chr1	42115000	42126600	6_TxWk	HIVEP3	chr1	42116400	42125800	15_NA	HIVEP3
chr1	42126600	42127400	2_TssFlnk	HIVEP3	chr1	42126800	42127600	4_TssFlnkD	HIVEP3
chr1	42143200	42145000	9_EnhA1	HIVEP3	chr1	42143400	42145000	11_EnhWk	HIVEP3
chr1	42205200	42205400	10_EnhA2	HIVEP3	chr1	42205200	42205400	4_TssFlnkD	HIVEP3
chr1	42296000	42297800	14_ReprPCWk	HIVEP3	chr1	42295800	42298000	13_ReprPC	HIVEP3
chr1	42357000	42357600	3_TssFlnkU	HIVEP3	chr1	42357000	42357600	4_TssFlnkD	HIVEP3
chr1	42628600	42630389	15_NA	GUCA2A	chr1	42628362	42630389	14_ReprPCWk	GUCA2A
chr1	42642210	42643000	5_Tx	FOXJ3	chr1	42642400	42643200	6_TxWk	FOXJ3
chr1	42692000	42692600	9_EnhA1	FOXJ3	chr1	42692000	42692400	7_EnhG1	FOXJ3
chr1	42744200	42745000	4_TssFlnkD	FOXJ3	chr1	42744200	42745400	11_EnhWk	FOXJ3
chr1	42887000	42888249	13_ReprPC	RIMKLA	chr1	42886600	42888249	14_ReprPCWk	RIMKLA
chr1	42917800	42921200	14_ReprPCWk	ZMYND12	chr1	42917000	42921200	15_NA	ZMYND12
chr1	42921200	42921800	2_TssFlnk	ZMYND12	chr1	42921400	42921938	4_TssFlnkD	ZMYND12
chr1	43154400	43156800	6_TxWk	YBX1	chr1	43155000	43157800	7_EnhG1	YBX1
chr1	43198764	43205925	15_NA	CLDN19	chr1	43198764	43204600	14_ReprPCWk	CLDN19
chr1	43230200	43230600	2_TssFlnk	P3H1	chr1	43230200	43230800	4_TssFlnkD	LEPRE1
chr1	43233600	43234000	2_TssFlnk	C1orf50	chr1	43233600	43234000	4_TssFlnkD	C1orf50
chr1	43251200	43259800	15_NA	C1orf50	chr1	43253000	43262600	14_ReprPCWk	C1orf50
chr1	43302400	43309800	5_Tx	ERMAP	chr1	43300400	43307000	6_TxWk	ERMAP
chr1	43410600	43411800	6_TxWk	SLC2A1	chr1	43410800	43411600	9_EnhA1	SLC2A1
chr1	43735800	43736600	14_ReprPCWk	EBNA1BP2	chr1	43735600	43736607	13_ReprPC	EBNA1BP2
chr1	43735800	43736600	14_ReprPCWk	EBNA1BP2	chr1	43735600	43736607	13_ReprPC	EBNA1BP2
chr1	43776600	43788779	15_NA	TIE1	chr1	43775200	43784200	14_ReprPCWk	TIE1
chr1	43918800	43919000	8_EnhG2	HYI	chr1	43918800	43919000	4_TssFlnkD	HYI
chr1	43919000	43919660	1_TssA	HYI	chr1	43919000	43919600	2_TssFlnk	HYI
chr1	43995400	43996000	11_EnhWk	PTPRF	chr1	43995400	43996000	13_ReprPC	PTPRF
chr1	43998600	44003800	6_TxWk	PTPRF	chr1	43999800	44003800	14_ReprPCWk	PTPRF
chr1	44003800	44005400	5_Tx	PTPRF	chr1	44003800	44005200	13_ReprPC	PTPRF
chr1	44005400	44008800	6_TxWk	PTPRF	chr1	44006200	44008400	11_EnhWk	PTPRF
chr1	44008800	44014600	5_Tx	PTPRF	chr1	44010800	44016200	14_ReprPCWk	PTPRF
chr1	44019000	44023000	5_Tx	PTPRF	chr1	44019000	44021800	6_TxWk	PTPRF
chr1	44031200	44032000	2_TssFlnk	PTPRF	chr1	44031000	44032000	4_TssFlnkD	PTPRF
chr1	44032000	44035400	6_TxWk	PTPRF	chr1	44032000	44035000	14_ReprPCWk	PTPRF
chr1	44047400	44048400	7_EnhG1	PTPRF	chr1	44047400	44048400	11_EnhWk	PTPRF
chr1	44048400	44051800	5_Tx	PTPRF	chr1	44048400	44053000	6_TxWk	PTPRF
chr1	44116600	44118000	2_TssFlnk	KDM4A	chr1	44116800	44118000	4_TssFlnkD	KDM4A
chr1	44171495	44171800	5_Tx	ST3GAL3	chr1	44171600	44171800	6_TxWk	ST3GAL3
chr1	44174000	44174600	2_TssFlnk	ST3GAL3	chr1	44174000	44174600	3_TssFlnkU	ST3GAL3
chr1	44178000	44178200	9_EnhA1	ST3GAL3	chr1	44178000	44178200	7_EnhG1	ST3GAL3
chr1	44209400	44212200	6_TxWk	ST3GAL3	chr1	44209200	44211800	5_Tx	ST3GAL3
chr1	44213800	44216800	6_TxWk	ST3GAL3	chr1	44214200	44216000	5_Tx	ST3GAL3
chr1	44240600	44243000	6_TxWk	ST3GAL3	chr1	44239800	44242800	7_EnhG1	ST3GAL3
chr1	44301000	44301400	3_TssFlnkU	ST3GAL3	chr1	44301000	44301600	9_EnhA1	ST3GAL3
chr1	44320400	44323000	5_Tx	ST3GAL3	chr1	44319800	44323600	6_TxWk	ST3GAL3
chr1	44323600	44324600	7_EnhG1	ST3GAL3	chr1	44323600	44324600	11_EnhWk	ST3GAL3
chr1	44372200	44376600	5_Tx	ST3GAL3	chr1	44370400	44375000	6_TxWk	ST3GAL3
chr1	44399200	44399600	2_TssFlnk	ARTN	chr1	44398992	44399600	4_TssFlnkD	ARTN
chr1	44402600	44402913	14_ReprPCWk	ARTN	chr1	44402600	44402913	13_ReprPC	ARTN
chr1	44412800	44414400	2_TssFlnk	IPO13	chr1	44413200	44414200	4_TssFlnkD	IPO13
chr1	44441200	44441800	2_TssFlnk	ATP6V0B	chr1	44441200	44441800	4_TssFlnkD	ATP6V0B
chr1	44442200	44443967	5_Tx	ATP6V0B	chr1	44442000	44443967	7_EnhG1	ATP6V0B
chr1	44444615	44445600	2_TssFlnk	B4GALT2	chr1	44444615	44445800	1_TssA	B4GALT2
chr1	44445800	44446200	2_TssFlnk	B4GALT2	chr1	44445800	44446200	3_TssFlnkU	B4GALT2
chr1	44446200	44446800	8_EnhG2	B4GALT2	chr1	44446200	44446600	2_TssFlnk	B4GALT2
chr1	44448600	44449200	6_TxWk	B4GALT2	chr1	44448200	44449200	7_EnhG1	B4GALT2
chr1	44456600	44456840	2_TssFlnk	B4GALT2	chr1	44456600	44456840	4_TssFlnkD	B4GALT2
chr1	44457031	44457200	1_TssA	CCDC24	chr1	44457031	44457200	4_TssFlnkD	CCDC24
chr1	44457172	44457200	1_TssA	SLC6A9	chr1	44457172	44457200	4_TssFlnkD	SLC6A9
chr1	44490400	44494600	15_NA	SLC6A9	chr1	44491600	44494200	6_TxWk	SLC6A9
chr1	44586000	44594200	13_ReprPC	KLF17	chr1	44587400	44595800	14_ReprPCWk	KLF17
chr1	44595600	44600812	13_ReprPC	KLF17	chr1	44597600	44600812	14_ReprPCWk	KLF17
chr1	44706000	44707000	7_EnhG1	ERI3	chr1	44706400	44707200	11_EnhWk	ERI3
chr1	44707600	44709800	5_Tx	ERI3	chr1	44707200	44709200	6_TxWk	ERI3
chr1	44820000	44820400	4_TssFlnkD	ERI3	chr1	44819800	44820400	2_TssFlnk	ERI3
chr1	44930800	44937200	13_ReprPC	RNF220	chr1	44928600	44935000	14_ReprPCWk	RNF220
chr1	44944400	44949600	14_ReprPCWk	RNF220	chr1	44941800	44949600	13_ReprPC	RNF220
chr1	45097000	45097400	3_TssFlnkU	RNF220	chr1	45097000	45097400	4_TssFlnkD	RNF220
chr1	45140364	45141000	2_TssFlnk	ARMH1	chr1	45140400	45140800	4_TssFlnkD	C1orf228
chr1	45161400	45164400	14_ReprPCWk	ARMH1	chr1	45162000	45163800	13_ReprPC	C1orf228
chr1	45184000	45191263	6_TxWk	ARMH1	chr1	45185000	45191263	14_ReprPCWk	C1orf228
chr1	45207200	45208400	5_Tx	KIF2C	chr1	45207600	45208600	6_TxWk	KIF2C
chr1	45249600	45250400	2_TssFlnk	BEST4	chr1	45249600	45250400	4_TssFlnkD	BEST4
chr1	45250400	45251400	6_TxWk	BEST4	chr1	45250400	45251800	11_EnhWk	BEST4
chr1	45251800	45252200	2_TssFlnk	BEST4	chr1	45251800	45252200	4_TssFlnkD	BEST4
chr1	45252200	45253377	15_NA	BEST4	chr1	45252200	45253377	14_ReprPCWk	BEST4
chr1	45269800	45271662	5_Tx	PLK3	chr1	45269000	45271662	7_EnhG1	PLK3
chr1	45285516	45285600	2_TssFlnk	PTCH2	chr1	45285516	45285600	3_TssFlnkU	PTCH2
chr1	45286000	45286400	2_TssFlnk	PTCH2	chr1	45285800	45286400	3_TssFlnkU	PTCH2
chr1	45308400	45308735	2_TssFlnk	PTCH2	chr1	45308400	45308735	4_TssFlnkD	PTCH2
chr1	45324200	45327200	6_TxWk	EIF2B3	chr1	45324400	45327800	5_Tx	EIF2B3
chr1	45327200	45329400	5_Tx	EIF2B3	chr1	45327800	45330400	6_TxWk	EIF2B3
chr1	45329400	45332400	6_TxWk	EIF2B3	chr1	45330400	45333000	5_Tx	EIF2B3
chr1	45387200	45389800	6_TxWk	EIF2B3	chr1	45387000	45389800	5_Tx	EIF2B3
chr1	45389800	45390000	10_EnhA2	EIF2B3	chr1	45389800	45390000	7_EnhG1	EIF2B3
chr1	45411800	45412600	10_EnhA2	EIF2B3	chr1	45411800	45412400	11_EnhWk	EIF2B3
chr1	45451000	45452000	2_TssFlnk	EIF2B3	chr1	45451000	45451600	4_TssFlnkD	EIF2B3
chr1	45531200	45537600	14_ReprPCWk	ZSWIM5	chr1	45529000	45539000	15_NA	ZSWIM5
chr1	45537600	45543400	13_ReprPC	ZSWIM5	chr1	45539000	45543000	14_ReprPCWk	ZSWIM5
chr1	45587600	45591000	13_ReprPC	ZSWIM5	chr1	45588800	45592200	14_ReprPCWk	ZSWIM5
chr1	45663000	45671600	13_ReprPC	ZSWIM5	chr1	45663400	45671000	14_ReprPCWk	ZSWIM5
chr1	45673000	45677200	13_ReprPC	ZSWIM5	chr1	45674200	45678000	14_ReprPCWk	ZSWIM5
chr1	45770000	45770600	2_TssFlnk	ZSWIM5	chr1	45769800	45770400	4_TssFlnkD	ZSWIM5
chr1	45770600	45771881	14_ReprPCWk	ZSWIM5	chr1	45770600	45771881	15_NA	ZSWIM5
chr1	45806600	45807000	2_TssFlnk	TOE1	chr1	45806600	45807200	8_EnhG2	TOE1
chr1	45959538	45965000	6_TxWk	CCDC163P	chr1	45959538	45964800	15_NA	CCDC163P
chr1	45984800	45985000	1_TssA	PRDX1	chr1	45984800	45985000	8_EnhG2	PRDX1
chr1	46017800	46018400	11_EnhWk	AKR1A1	chr1	46017800	46018200	6_TxWk	AKR1A1
chr1	46150000	46151000	2_TssFlnk	GPBP1L1	chr1	46150200	46150800	4_TssFlnkD	GPBP1L1
chr1	46154600	46155200	2_TssFlnk	TMEM69	chr1	46154600	46155000	4_TssFlnkD	TMEM69
chr1	46253800	46259800	15_NA	MAST2	chr1	46253200	46259200	14_ReprPCWk	MAST2
chr1	46260400	46267800	15_NA	MAST2	chr1	46261800	46267800	6_TxWk	MAST2
chr1	46316600	46328800	15_NA	MAST2	chr1	46316000	46328800	6_TxWk	MAST2
chr1	46329600	46330600	1_TssA	MAST2	chr1	46329400	46331000	2_TssFlnk	MAST2
chr1	46357600	46357800	10_EnhA2	MAST2	chr1	46357600	46357800	9_EnhA1	MAST2
chr1	46358200	46358600	9_EnhA1	MAST2	chr1	46358200	46358600	11_EnhWk	MAST2
chr1	46362600	46377800	15_NA	MAST2	chr1	46358600	46377000	6_TxWk	MAST2
chr1	46417200	46419000	10_EnhA2	MAST2	chr1	46417000	46418800	11_EnhWk	MAST2
chr1	46595600	46597600	2_TssFlnk	PIK3R3	chr1	46595600	46597000	12_TssBiv	PIK3R3
chr1	46599600	46601200	6_TxWk	PIK3R3	chr1	46599600	46601400	11_EnhWk	PIK3R3
chr1	46601400	46603200	6_TxWk	PIK3R3	chr1	46601400	46603400	14_ReprPCWk	PIK3R3
chr1	46617200	46618200	9_EnhA1	PIK3R3	chr1	46617200	46618200	11_EnhWk	PIK3R3
chr1	46619800	46623000	15_NA	PIK3R3	chr1	46618200	46623200	14_ReprPCWk	PIK3R3
chr1	46664000	46665000	2_TssFlnk	POMGNT1	chr1	46663600	46664600	1_TssA	POMGNT1
chr1	46765000	46766000	5_Tx	LRRC41	chr1	46765200	46766400	7_EnhG1	LRRC41
chr1	46766400	46767000	3_TssFlnkU	LRRC41	chr1	46766400	46766800	8_EnhG2	LRRC41
chr1	46770800	46772400	6_TxWk	UQCRH	chr1	46770800	46772000	7_EnhG1	UQCRH
chr1	46806800	46807800	2_TssFlnk	NSUN4	chr1	46807000	46807600	4_TssFlnkD	NSUN4
chr1	46876800	46879520	6_TxWk	FAAH	chr1	46876200	46879200	14_ReprPCWk	FAAH
chr1	47013200	47017199	14_ReprPCWk	KNCN	chr1	47014400	47017199	13_ReprPC	KNCN
chr1	47023090	47023200	6_TxWk	MKNK1	chr1	47023090	47023200	11_EnhWk	MKNK1
chr1	47069400	47069600	1_TssA	MKNK1	chr1	47069400	47069600	2_TssFlnk	MKNK1
chr1	47164000	47165800	6_TxWk	EFCAB14	chr1	47164200	47165400	5_Tx	EFCAB14
chr1	47394849	47407156	15_NA	CYP4A11	chr1	47397200	47407156	14_ReprPCWk	CYP4A11
chr1	47603107	47615413	15_NA	CYP4A22	chr1	47606600	47615413	14_ReprPCWk	CYP4A22
chr1	47778200	47778800	8_EnhG2	STIL	chr1	47778200	47778600	2_TssFlnk	STIL
chr1	47801200	47802000	6_TxWk	CMPK1	chr1	47801200	47801800	11_EnhWk	CMPK1
chr1	48319800	48361000	14_ReprPCWk	TRABD2B	chr1	48322800	48354400	15_NA	TRABD2B
chr1	48792000	48834400	15_NA	SPATA6	chr1	48802400	48835000	6_TxWk	SPATA6
chr1	48914400	48932400	15_NA	SPATA6	chr1	48913800	48928600	6_TxWk	SPATA6
chr1	49078800	49081600	13_ReprPC	AGBL4	chr1	49079800	49082400	14_ReprPCWk	AGBL4
chr1	49087000	49092600	13_ReprPC	AGBL4	chr1	49085800	49091400	14_ReprPCWk	AGBL4
chr1	49093600	49096600	13_ReprPC	AGBL4	chr1	49093600	49095400	14_ReprPCWk	AGBL4
chr1	49120800	49128800	14_ReprPCWk	AGBL4	chr1	49117800	49128000	15_NA	AGBL4
chr1	49128800	49136000	13_ReprPC	AGBL4	chr1	49128000	49134200	14_ReprPCWk	AGBL4
chr1	49201800	49223800	6_TxWk	BEND5	chr1	49193195	49216600	15_NA	BEND5
chr1	49201800	49223800	6_TxWk	BEND5	chr1	49193195	49216600	15_NA	BEND5
chr1	49241600	49242641	2_TssFlnk	BEND5	chr1	49241400	49242641	12_TssBiv	BEND5
chr1	49241600	49243400	2_TssFlnk	AGBL4	chr1	49241400	49243600	12_TssBiv	AGBL4
chr1	49300200	49305600	13_ReprPC	AGBL4	chr1	49299000	49304000	14_ReprPCWk	AGBL4
chr1	49318000	49318800	11_EnhWk	AGBL4	chr1	49318000	49318800	9_EnhA1	AGBL4
chr1	51069400	51070000	9_EnhA1	FAF1	chr1	51069200	51070200	11_EnhWk	FAF1
chr1	51070200	51076400	6_TxWk	FAF1	chr1	51070200	51076400	15_NA	FAF1
chr1	51266800	51295000	15_NA	FAF1	chr1	51253800	51295000	6_TxWk	FAF1
chr1	51737600	51739127	5_Tx	RNF11	chr1	51738000	51739127	6_TxWk	RNF11
chr1	51752930	51760200	6_TxWk	TTC39A	chr1	51752930	51760400	15_NA	TTC39A
chr1	51884000	51884400	11_EnhWk	EPS15	chr1	51884000	51884600	6_TxWk	EPS15
chr1	51980800	51982200	6_TxWk	EPS15	chr1	51980600	51982200	11_EnhWk	EPS15
chr1	51982400	51983200	2_TssFlnk	EPS15	chr1	51982200	51983400	4_TssFlnkD	EPS15
chr1	52070000	52078400	15_NA	OSBPL9	chr1	52067400	52076200	14_ReprPCWk	OSBPL9
chr1	52083800	52084800	2_TssFlnk	OSBPL9	chr1	52083800	52085000	4_TssFlnkD	OSBPL9
chr1	52085800	52088000	6_TxWk	OSBPL9	chr1	52085600	52088600	11_EnhWk	OSBPL9
chr1	52109200	52110600	10_EnhA2	OSBPL9	chr1	52109400	52111000	11_EnhWk	OSBPL9
chr1	52126600	52127200	10_EnhA2	OSBPL9	chr1	52126800	52127200	11_EnhWk	OSBPL9
chr1	52155400	52156400	11_EnhWk	OSBPL9	chr1	52155600	52156600	9_EnhA1	OSBPL9
chr1	52229600	52235400	6_TxWk	OSBPL9	chr1	52230800	52234400	5_Tx	OSBPL9
chr1	52340200	52342400	6_TxWk	NRDC	chr1	52340400	52342000	7_EnhG1	NRD1
chr1	52342400	52343200	2_TssFlnk	NRDC	chr1	52342200	52343400	4_TssFlnkD	NRD1
chr1	52382000	52384800	5_Tx	RAB3B	chr1	52382200	52384000	11_EnhWk	RAB3B
chr1	52456400	52456436	1_TssA	RAB3B	chr1	52456400	52456436	12_TssBiv	RAB3B
chr1	52523000	52523400	2_TssFlnk	BTF3L4	chr1	52522800	52523400	4_TssFlnkD	BTF3L4
chr1	52523400	52525400	6_TxWk	BTF3L4	chr1	52523400	52525200	11_EnhWk	BTF3L4
chr1	52609800	52624800	15_NA	ZFYVE9	chr1	52609400	52624800	6_TxWk	ZFYVE9
chr1	52705200	52729800	15_NA	ZFYVE9	chr1	52709000	52730800	6_TxWk	ZFYVE9
chr1	52729800	52732600	6_TxWk	ZFYVE9	chr1	52730800	52733000	5_Tx	ZFYVE9
chr1	52870800	52871600	2_TssFlnk	PRPF38A	chr1	52870800	52871600	4_TssFlnkD	PRPF38A
chr1	53068044	53068400	2_TssFlnk	GPX7	chr1	53068044	53068400	4_TssFlnkD	GPX7
chr1	53123200	53124400	14_ReprPCWk	SHISAL2A	chr1	53122800	53124400	13_ReprPC	FAM159A
chr1	53395800	53414800	6_TxWk	SCP2	chr1	53394200	53413200	15_NA	SCP2
chr1	53470800	53480000	6_TxWk	SCP2	chr1	53473400	53480000	15_NA	SCP2
chr1	53552855	53554800	15_NA	SLC1A7	chr1	53553600	53554800	14_ReprPCWk	SLC1A7
chr1	53555600	53557600	6_TxWk	SLC1A7	chr1	53556400	53557800	14_ReprPCWk	SLC1A7
chr1	53558400	53568000	15_NA	SLC1A7	chr1	53561000	53569200	14_ReprPCWk	SLC1A7
chr1	53791200	53791400	7_EnhG1	LRP8	chr1	53791200	53791400	11_EnhWk	LRP8
chr1	53792000	53792600	1_TssA	LRP8	chr1	53792200	53792800	4_TssFlnkD	LRP8
chr1	53930800	53933161	15_NA	DMRTB1	chr1	53931000	53932600	14_ReprPCWk	DMRTB1
chr1	54052600	54054800	5_Tx	GLIS1	chr1	54053200	54054800	6_TxWk	GLIS1
chr1	54304400	54304533	2_TssFlnk	NDC1	chr1	54304400	54304533	4_TssFlnkD	NDC1
chr1	54354800	54355200	2_TssFlnk	YIPF1	chr1	54354800	54355200	4_TssFlnkD	YIPF1
chr1	54356000	54356400	3_TssFlnkU	YIPF1	chr1	54356000	54356400	4_TssFlnkD	YIPF1
chr1	54356400	54356407	9_EnhA1	YIPF1	chr1	54356400	54356407	11_EnhWk	YIPF1
chr1	54356912	54360400	15_NA	DIO1	chr1	54356912	54362200	14_ReprPCWk	DIO1
chr1	54411750	54412000	2_TssFlnk	LRRC42	chr1	54411800	54412000	1_TssA	LRRC42
chr1	54412000	54412600	1_TssA	LRRC42	chr1	54412000	54412600	2_TssFlnk	LRRC42
chr1	54412600	54413600	2_TssFlnk	LRRC42	chr1	54412800	54413600	4_TssFlnkD	LRRC42
chr1	54519600	54520400	2_TssFlnk	TCEANC2	chr1	54519600	54520400	4_TssFlnkD	TCEANC2
chr1	54569968	54571750	6_TxWk	AL161915.1	chr1	54569968	54571750	15_NA	AL161915.1
chr1	54573000	54578192	15_NA	TCEANC2	chr1	54574400	54578192	14_ReprPCWk	TCEANC2
chr1	54598747	54601400	15_NA	CDCP2	chr1	54598747	54601200	14_ReprPCWk	CDCP2
chr1	54624200	54626000	6_TxWk	RP11-446E24.4	chr1	54624200	54625600	14_ReprPCWk	RP11-446E24.4
chr1	54635333	54637997	15_NA	AL357673.1	chr1	54635333	54637997	6_TxWk	AL357673.1
chr1	54666600	54667000	2_TssFlnk	MRPL37	chr1	54666600	54667200	4_TssFlnkD	MRPL37
chr1	54739800	54741800	11_EnhWk	SSBP3	chr1	54739400	54741600	9_EnhA1	SSBP3
chr1	54741800	54744200	6_TxWk	SSBP3	chr1	54741600	54743400	11_EnhWk	SSBP3
chr1	54850600	54851200	11_EnhWk	SSBP3	chr1	54850600	54851600	9_EnhA1	SSBP3
chr1	54856000	54856400	11_EnhWk	SSBP3	chr1	54856000	54856400	4_TssFlnkD	SSBP3
chr1	54856400	54856800	2_TssFlnk	SSBP3	chr1	54856400	54856800	11_EnhWk	SSBP3
chr1	54870600	54871000	4_TssFlnkD	SSBP3	chr1	54870400	54871000	2_TssFlnk	SSBP3
chr1	55007930	55008600	1_TssA	ACOT11	chr1	55007930	55009000	3_TssFlnkU	ACOT11
chr1	55010800	55011600	10_EnhA2	ACOT11	chr1	55010800	55011600	6_TxWk	ACOT11
chr1	55229000	55229200	11_EnhWk	PARS2	chr1	55229000	55229200	2_TssFlnk	PARS2
chr1	55271736	55273000	14_ReprPCWk	LEXM	chr1	55271736	55273200	6_TxWk	C1orf177
chr1	55315306	55315800	6_TxWk	DHCR24	chr1	55315306	55315800	15_NA	DHCR24
chr1	55326800	55327800	9_EnhA1	DHCR24	chr1	55326800	55327800	7_EnhG1	DHCR24
chr1	55327800	55328200	11_EnhWk	DHCR24	chr1	55327800	55328400	5_Tx	DHCR24
chr1	55509200	55521200	14_ReprPCWk	PCSK9	chr1	55505600	55518000	13_ReprPC	PCSK9
chr1	57045600	57046000	4_TssFlnkD	PLPP3	chr1	57045600	57046000	3_TssFlnkU	PPAP2B
chr1	57092200	57093400	10_EnhA2	PLPP3	chr1	57092000	57094000	11_EnhWk	PPAP2B
chr1	57109600	57110000	14_ReprPCWk	PLPP3	chr1	57109600	57110000	11_EnhWk	PPAP2B
chr1	57154400	57181008	15_NA	PRKAA2	chr1	57154800	57171800	6_TxWk	PRKAA2
chr1	57195800	57201200	14_ReprPCWk	FYB2	chr1	57195000	57199400	13_ReprPC	C1orf168
chr1	57219600	57221600	14_ReprPCWk	FYB2	chr1	57218800	57221200	13_ReprPC	C1orf168
chr1	57408400	57412600	14_ReprPCWk	C8B	chr1	57408800	57412800	15_NA	C8B
chr1	57893600	57896200	13_ReprPC	DAB1	chr1	57892600	57895600	14_ReprPCWk	DAB1
chr1	57896200	57917000	14_ReprPCWk	DAB1	chr1	57895600	57916800	15_NA	DAB1
chr1	57954800	57956000	10_EnhA2	DAB1	chr1	57954600	57956000	11_EnhWk	DAB1
chr1	58867800	58868400	4_TssFlnkD	DAB1	chr1	58867800	58868800	11_EnhWk	DAB1
chr1	59041099	59041800	14_ReprPCWk	TACSTD2	chr1	59041099	59042200	13_ReprPC	TACSTD2
chr1	59041800	59042800	13_ReprPC	TACSTD2	chr1	59042200	59043000	12_TssBiv	TACSTD2
chr1	59164200	59164400	8_EnhG2	MYSM1	chr1	59164200	59164400	11_EnhWk	MYSM1
chr1	59776400	59781800	15_NA	FGGY	chr1	59776600	59781600	6_TxWk	FGGY
chr1	59781800	59782000	10_EnhA2	FGGY	chr1	59781800	59782000	9_EnhA1	FGGY
chr1	59782000	59782200	9_EnhA1	FGGY	chr1	59782000	59782200	3_TssFlnkU	FGGY
chr1	59782200	59783200	3_TssFlnkU	FGGY	chr1	59782200	59783000	1_TssA	FGGY
chr1	59826600	59828400	10_EnhA2	FGGY	chr1	59827200	59828400	5_Tx	FGGY
chr1	59842200	59843400	10_EnhA2	FGGY	chr1	59842600	59843600	5_Tx	FGGY
chr1	59843400	59858600	15_NA	FGGY	chr1	59846600	59858400	6_TxWk	FGGY
chr1	59884000	59891200	15_NA	FGGY	chr1	59884200	59888600	6_TxWk	FGGY
chr1	59891600	59893800	9_EnhA1	FGGY	chr1	59892000	59893400	10_EnhA2	FGGY
chr1	59901000	59909000	6_TxWk	FGGY	chr1	59901000	59908800	15_NA	FGGY
chr1	59912800	59920600	15_NA	FGGY	chr1	59913800	59918800	6_TxWk	FGGY
chr1	59953000	59953400	11_EnhWk	FGGY	chr1	59952800	59953400	10_EnhA2	FGGY
chr1	59953400	59964200	15_NA	FGGY	chr1	59953600	59961400	6_TxWk	FGGY
chr1	59972600	59972800	2_TssFlnk	FGGY	chr1	59972600	59972800	4_TssFlnkD	FGGY
chr1	60035200	60061000	15_NA	FGGY	chr1	60040600	60061000	6_TxWk	FGGY
chr1	60065800	60068000	9_EnhA1	FGGY	chr1	60066000	60068000	10_EnhA2	FGGY
chr1	60068000	60069800	10_EnhA2	FGGY	chr1	60068000	60070000	6_TxWk	FGGY
chr1	60205200	60216200	15_NA	FGGY	chr1	60205000	60215600	6_TxWk	FGGY
chr1	60218600	60224600	15_NA	FGGY	chr1	60218800	60224400	6_TxWk	FGGY
chr1	60226800	60227800	9_EnhA1	FGGY	chr1	60226800	60228000	10_EnhA2	FGGY
chr1	60289400	60303800	14_ReprPCWk	HOOK1	chr1	60287200	60304400	15_NA	HOOK1
chr1	60459800	60460800	10_EnhA2	C1orf87	chr1	60459600	60461000	11_EnhWk	C1orf87
chr1	60460800	60461400	9_EnhA1	C1orf87	chr1	60461000	60461600	10_EnhA2	C1orf87
chr1	61356000	61368800	15_NA	NFIA	chr1	61356400	61367400	14_ReprPCWk	NFIA
chr1	61368800	61369600	10_EnhA2	NFIA	chr1	61368800	61369800	11_EnhWk	NFIA
chr1	61371200	61385600	15_NA	NFIA	chr1	61370800	61380800	14_ReprPCWk	NFIA
chr1	61519400	61520000	12_TssBiv	NFIA	chr1	61519400	61520200	2_TssFlnk	NFIA
chr1	61520000	61522000	13_ReprPC	NFIA	chr1	61520200	61522200	14_ReprPCWk	NFIA
chr1	61546400	61547000	11_EnhWk	NFIA	chr1	61546400	61546800	9_EnhA1	NFIA
chr1	61554600	61554800	2_TssFlnk	NFIA	chr1	61554600	61554800	4_TssFlnkD	NFIA
chr1	61555400	61556000	6_TxWk	NFIA	chr1	61555200	61555800	11_EnhWk	NFIA
chr1	61556000	61556800	2_TssFlnk	NFIA	chr1	61556200	61557000	4_TssFlnkD	NFIA
chr1	61567200	61567600	1_TssA	NFIA	chr1	61567200	61567600	3_TssFlnkU	NFIA
chr1	61567600	61568000	2_TssFlnk	NFIA	chr1	61567600	61568200	4_TssFlnkD	NFIA
chr1	61568000	61586000	15_NA	NFIA	chr1	61568800	61582400	6_TxWk	NFIA
chr1	61586000	61586800	2_TssFlnk	NFIA	chr1	61586000	61586600	3_TssFlnkU	NFIA
chr1	61642400	61647200	14_ReprPCWk	NFIA	chr1	61639600	61646800	15_NA	NFIA
chr1	61705800	61710800	14_ReprPCWk	NFIA	chr1	61704000	61709400	6_TxWk	NFIA
chr1	61772000	61784000	15_NA	NFIA	chr1	61768600	61783200	6_TxWk	NFIA
chr1	61784000	61784200	11_EnhWk	NFIA	chr1	61784000	61784200	4_TssFlnkD	NFIA
chr1	61803800	61804000	2_TssFlnk	NFIA	chr1	61803800	61804000	10_EnhA2	NFIA
chr1	61806400	61812400	14_ReprPCWk	NFIA	chr1	61805200	61810400	6_TxWk	NFIA
chr1	61812400	61834800	15_NA	NFIA	chr1	61810600	61834600	6_TxWk	NFIA
chr1	61837000	61863400	15_NA	NFIA	chr1	61845000	61863800	6_TxWk	NFIA
chr1	62748400	62752600	14_ReprPCWk	KANK4	chr1	62748600	62754600	13_ReprPC	KANK4
chr1	63148800	63152400	6_TxWk	DOCK7	chr1	63148600	63152600	11_EnhWk	DOCK7
chr1	63250800	63267200	15_NA	ATG4C	chr1	63251400	63277400	6_TxWk	ATG4C
chr1	64241000	64241800	2_TssFlnk	ROR1	chr1	64241200	64242000	4_TssFlnkD	ROR1
chr1	64279200	64280000	9_EnhA1	ROR1	chr1	64279200	64279800	11_EnhWk	ROR1
chr1	64284600	64286800	6_TxWk	ROR1	chr1	64283600	64286800	14_ReprPCWk	ROR1
chr1	64307600	64308400	11_EnhWk	ROR1	chr1	64307400	64308400	6_TxWk	ROR1
chr1	64385800	64387200	9_EnhA1	ROR1	chr1	64386000	64387200	11_EnhWk	ROR1
chr1	64472800	64485200	6_TxWk	ROR1	chr1	64473000	64485200	15_NA	ROR1
chr1	64485800	64486200	10_EnhA2	ROR1	chr1	64485800	64486200	9_EnhA1	ROR1
chr1	64486200	64503600	15_NA	ROR1	chr1	64488000	64499600	6_TxWk	ROR1
chr1	64529200	64530000	9_EnhA1	ROR1	chr1	64528800	64529800	11_EnhWk	ROR1
chr1	64530000	64531600	11_EnhWk	ROR1	chr1	64529800	64531600	6_TxWk	ROR1
chr1	64600000	64602000	6_TxWk	ROR1	chr1	64600400	64602400	11_EnhWk	ROR1
chr1	64678400	64688600	15_NA	UBE2U	chr1	64678600	64688600	6_TxWk	UBE2U
chr1	64695600	64712400	14_ReprPCWk	UBE2U	chr1	64694600	64712000	15_NA	UBE2U
chr1	64936428	64937400	12_TssBiv	CACHD1	chr1	64936428	64937400	2_TssFlnk	CACHD1
chr1	64937400	64940600	13_ReprPC	CACHD1	chr1	64937400	64941600	14_ReprPCWk	CACHD1
chr1	64965000	64970800	14_ReprPCWk	CACHD1	chr1	64963600	64968600	15_NA	CACHD1
chr1	64995400	65006200	14_ReprPCWk	CACHD1	chr1	64993000	65005600	15_NA	CACHD1
chr1	65081800	65089800	13_ReprPC	CACHD1	chr1	65079800	65087000	14_ReprPCWk	CACHD1
chr1	65091000	65098800	13_ReprPC	CACHD1	chr1	65090000	65096400	14_ReprPCWk	CACHD1
chr1	65307200	65308400	6_TxWk	JAK1	chr1	65307200	65308800	7_EnhG1	JAK1
chr1	65345000	65347000	6_TxWk	JAK1	chr1	65345800	65347600	11_EnhWk	JAK1
chr1	65636000	65636600	1_TssA	AK4	chr1	65635800	65636600	9_EnhA1	AK4
chr1	65655200	65655800	10_EnhA2	AK4	chr1	65655000	65656000	11_EnhWk	AK4
chr1	65696600	65697828	6_TxWk	AK4	chr1	65696800	65697800	11_EnhWk	AK4
chr1	65720400	65721400	12_TssBiv	DNAJC6	chr1	65720400	65721000	4_TssFlnkD	DNAJC6
chr1	65730200	65732000	2_TssFlnk	DNAJC6	chr1	65730600	65732000	4_TssFlnkD	DNAJC6
chr1	65734600	65740800	14_ReprPCWk	DNAJC6	chr1	65732200	65740000	15_NA	DNAJC6
chr1	65774600	65776200	12_TssBiv	DNAJC6	chr1	65775000	65776000	2_TssFlnk	DNAJC6
chr1	65776200	65779800	13_ReprPC	DNAJC6	chr1	65776400	65780400	14_ReprPCWk	DNAJC6
chr1	65906200	65906800	11_EnhWk	LEPR	chr1	65906200	65907000	9_EnhA1	LEPR
chr1	65908800	65926200	15_NA	LEPR	chr1	65907800	65924600	6_TxWk	LEPR
chr1	65926200	65934800	6_TxWk	LEPR	chr1	65924800	65933200	15_NA	LEPR
chr1	65979000	65989000	15_NA	LEPR	chr1	65980400	65989600	6_TxWk	LEPR
chr1	65992200	65992800	11_EnhWk	LEPR	chr1	65992200	65993200	4_TssFlnkD	LEPR
chr1	65993000	65993600	2_TssFlnk	LEPR	chr1	65993200	65993600	1_TssA	LEPR
chr1	66042200	66083000	6_TxWk	LEPR	chr1	66044000	66071800	15_NA	LEPR
chr1	66278200	66286000	15_NA	PDE4B	chr1	66280200	66285600	6_TxWk	PDE4B
chr1	66736200	66737200	11_EnhWk	PDE4B	chr1	66736000	66737000	9_EnhA1	PDE4B
chr1	66766600	66767400	10_EnhA2	PDE4B	chr1	66766600	66767200	3_TssFlnkU	PDE4B
chr1	66800800	66801200	6_TxWk	PDE4B	chr1	66800600	66801200	2_TssFlnk	PDE4B
chr1	66801200	66801800	2_TssFlnk	PDE4B	chr1	66801200	66801800	3_TssFlnkU	PDE4B
chr1	67043000	67053800	15_NA	SGIP1	chr1	67043800	67056000	6_TxWk	SGIP1
chr1	67064800	67089800	15_NA	SGIP1	chr1	67065800	67089200	6_TxWk	SGIP1
chr1	67131547	67142600	15_NA	AL139147.1	chr1	67131547	67139000	6_TxWk	AL139147.1
chr1	67218142	67218600	2_TssFlnk	TCTEX1D1	chr1	67218200	67218600	4_TssFlnkD	TCTEX1D1
chr1	67392000	67392400	2_TssFlnk	MIER1	chr1	67392000	67392400	4_TssFlnkD	MIER1
chr1	67400000	67400800	10_EnhA2	MIER1	chr1	67400000	67401200	11_EnhWk	MIER1
chr1	67409800	67410800	10_EnhA2	MIER1	chr1	67409800	67411000	11_EnhWk	MIER1
chr1	67517400	67518400	2_TssFlnk	SLC35D1	chr1	67517600	67518600	4_TssFlnkD	SLC35D1
chr1	67632083	67642800	15_NA	IL23R	chr1	67632083	67643400	14_ReprPCWk	IL23R
chr1	67792200	67804000	15_NA	IL12RB2	chr1	67791400	67801000	14_ReprPCWk	IL12RB2
chr1	67892200	67892800	6_TxWk	SERBP1	chr1	67892200	67892600	8_EnhG2	SERBP1
chr1	67892800	67893200	2_TssFlnk	SERBP1	chr1	67892600	67893200	4_TssFlnkD	SERBP1
chr1	68200200	68200800	10_EnhA2	GNG12	chr1	68200200	68201200	11_EnhWk	GNG12
chr1	68251800	68256600	6_TxWk	GNG12	chr1	68252400	68256400	11_EnhWk	GNG12
chr1	68511645	68516000	15_NA	DIRAS3	chr1	68511645	68515800	14_ReprPCWk	DIRAS3
chr1	68569600	68570400	10_EnhA2	WLS	chr1	68569200	68570400	11_EnhWk	WLS
chr1	68638800	68639400	9_EnhA1	WLS	chr1	68638600	68639200	11_EnhWk	WLS
chr1	68644000	68645400	11_EnhWk	WLS	chr1	68643400	68645000	9_EnhA1	WLS
chr1	68663400	68667200	6_TxWk	WLS	chr1	68662400	68668600	11_EnhWk	WLS
chr1	68959400	68961000	6_TxWk	DEPDC1	chr1	68959000	68960600	7_EnhG1	DEPDC1
chr1	68961200	68962000	2_TssFlnk	DEPDC1	chr1	68961400	68962200	4_TssFlnkD	DEPDC1
chr1	70381200	70381600	11_EnhWk	LRRC7	chr1	70381200	70381600	10_EnhA2	LRRC7
chr1	70510200	70510400	9_EnhA1	LRRC7	chr1	70510200	70510400	4_TssFlnkD	LRRC7
chr1	70510400	70511000	10_EnhA2	LRRC7	chr1	70510400	70510800	11_EnhWk	LRRC7
chr1	70511400	70511600	11_EnhWk	LRRC7	chr1	70511400	70511600	10_EnhA2	LRRC7
chr1	70599200	70607800	15_NA	LRRC7	chr1	70600600	70606000	6_TxWk	LRRC7
chr1	70672400	70672800	2_TssFlnk	SRSF11	chr1	70672400	70672800	4_TssFlnkD	SRSF11
chr1	70818200	70818600	2_TssFlnk	ANKRD13C	chr1	70818200	70818800	4_TssFlnkD	ANKRD13C
chr1	70847200	70850000	13_ReprPC	HHLA3	chr1	70847800	70851022	14_ReprPCWk	HHLA3
chr1	70876901	70877400	1_TssA	CTH	chr1	70876901	70877400	2_TssFlnk	CTH
chr1	70877600	70878000	11_EnhWk	CTH	chr1	70877400	70878000	4_TssFlnkD	CTH
chr1	70878000	70905534	15_NA	CTH	chr1	70878400	70904000	6_TxWk	CTH
chr1	72588400	72588800	11_EnhWk	NEGR1	chr1	72588400	72588800	4_TssFlnkD	NEGR1
chr1	72745200	72745600	6_TxWk	NEGR1	chr1	72745200	72745600	11_EnhWk	NEGR1
chr1	74663400	74663871	1_TssA	LRRIQ3	chr1	74663200	74663871	2_TssFlnk	LRRIQ3
chr1	75171170	75177200	5_Tx	CRYZ	chr1	75171170	75177000	6_TxWk	CRYZ
chr1	76191000	76192000	2_TssFlnk	ACADM	chr1	76191400	76192000	4_TssFlnkD	ACADM
chr1	76384558	76390200	14_ReprPCWk	ASB17	chr1	76385400	76390800	15_NA	ASB17
chr1	76620600	76627000	14_ReprPCWk	ST6GALNAC3	chr1	76620400	76625600	15_NA	ST6GALNAC3
chr1	76803200	76818200	14_ReprPCWk	ST6GALNAC3	chr1	76806000	76815400	15_NA	ST6GALNAC3
chr1	77463800	77465000	10_EnhA2	ST6GALNAC5	chr1	77463800	77465000	9_EnhA1	ST6GALNAC5
chr1	77554675	77573800	6_TxWk	PIGK	chr1	77554675	77582200	15_NA	PIGK
chr1	77636200	77637000	10_EnhA2	PIGK	chr1	77636000	77637000	9_EnhA1	PIGK
chr1	77748200	77749200	2_TssFlnk	AK5	chr1	77748600	77749200	4_TssFlnkD	AK5
chr1	77782800	77784200	6_TxWk	AK5	chr1	77783200	77784400	7_EnhG1	AK5
chr1	77786000	77786800	5_Tx	AK5	chr1	77786000	77787000	7_EnhG1	AK5
chr1	77787400	77788600	10_EnhA2	AK5	chr1	77787000	77788800	9_EnhA1	AK5
chr1	77788600	77789600	6_TxWk	AK5	chr1	77788800	77790000	7_EnhG1	AK5
chr1	77823400	77825400	6_TxWk	AK5	chr1	77822600	77825200	5_Tx	AK5
chr1	77825800	77826600	9_EnhA1	AK5	chr1	77825800	77826600	10_EnhA2	AK5
chr1	77860000	77860400	10_EnhA2	AK5	chr1	77860000	77860600	9_EnhA1	AK5
chr1	77871200	77873800	11_EnhWk	AK5	chr1	77871600	77874800	7_EnhG1	AK5
chr1	77904200	77904600	3_TssFlnkU	AK5	chr1	77904200	77904800	8_EnhG2	AK5
chr1	77938800	77940200	7_EnhG1	AK5	chr1	77939000	77940000	9_EnhA1	AK5
chr1	77969000	77970200	6_TxWk	AK5	chr1	77969000	77970200	10_EnhA2	AK5
chr1	77982000	77982200	10_EnhA2	AK5	chr1	77982000	77982200	7_EnhG1	AK5
chr1	78006400	78014600	5_Tx	AK5	chr1	78006600	78013000	7_EnhG1	AK5
chr1	78069400	78071600	6_TxWk	ZZZ3	chr1	78068800	78070800	5_Tx	ZZZ3
chr1	78074400	78081400	6_TxWk	ZZZ3	chr1	78071800	78078600	5_Tx	ZZZ3
chr1	78137200	78137400	10_EnhA2	ZZZ3	chr1	78137200	78137400	4_TssFlnkD	ZZZ3
chr1	78137400	78138400	1_TssA	ZZZ3	chr1	78137600	78138400	4_TssFlnkD	ZZZ3
chr1	78138400	78139000	10_EnhA2	ZZZ3	chr1	78138400	78139000	11_EnhWk	ZZZ3
chr1	78245309	78246400	2_TssFlnk	MIGA1	chr1	78245309	78246000	1_TssA	FAM73A
chr1	78295200	78296400	6_TxWk	MIGA1	chr1	78295000	78296000	7_EnhG1	FAM73A
chr1	78301600	78303800	5_Tx	MIGA1	chr1	78301600	78303400	6_TxWk	FAM73A
chr1	78325000	78328000	5_Tx	MIGA1	chr1	78324200	78327200	6_TxWk	FAM73A
chr1	78332400	78338400	5_Tx	MIGA1	chr1	78334000	78340200	6_TxWk	FAM73A
chr1	78366400	78367600	7_EnhG1	NEXN	chr1	78366400	78368200	5_Tx	NEXN
chr1	78441400	78441600	1_TssA	FUBP1	chr1	78441400	78441600	4_TssFlnkD	FUBP1
chr1	78511400	78512600	2_TssFlnk	GIPC2	chr1	78511400	78512600	12_TssBiv	GIPC2
chr1	78520000	78521000	10_EnhA2	GIPC2	chr1	78519800	78520800	11_EnhWk	GIPC2
chr1	78528400	78535800	15_NA	GIPC2	chr1	78529000	78534600	6_TxWk	GIPC2
chr1	78538200	78544600	15_NA	GIPC2	chr1	78539000	78544000	6_TxWk	GIPC2
chr1	78545000	78546000	9_EnhA1	GIPC2	chr1	78545400	78546400	10_EnhA2	GIPC2
chr1	78547000	78547800	6_TxWk	GIPC2	chr1	78547000	78547800	11_EnhWk	GIPC2
chr1	78548000	78548400	3_TssFlnkU	GIPC2	chr1	78547800	78548400	9_EnhA1	GIPC2
chr1	78548600	78557600	15_NA	GIPC2	chr1	78548400	78557800	6_TxWk	GIPC2
chr1	78571400	78579400	15_NA	GIPC2	chr1	78571800	78578200	6_TxWk	GIPC2
chr1	78958000	78961600	6_TxWk	PTGFR	chr1	78958600	78961000	7_EnhG1	PTGFR
chr1	78985800	78986800	6_TxWk	PTGFR	chr1	78985200	78986800	11_EnhWk	PTGFR
chr1	82155000	82155200	10_EnhA2	ADGRL2	chr1	82155000	82155200	9_EnhA1	LPHN2
chr1	82155200	82155400	9_EnhA1	ADGRL2	chr1	82155200	82155400	10_EnhA2	LPHN2
chr1	82155400	82156000	10_EnhA2	ADGRL2	chr1	82155400	82156000	9_EnhA1	LPHN2
chr1	82171000	82172200	6_TxWk	ADGRL2	chr1	82171000	82171800	10_EnhA2	LPHN2
chr1	82172200	82173400	10_EnhA2	ADGRL2	chr1	82172200	82173400	9_EnhA1	LPHN2
chr1	82269000	82273400	13_ReprPC	ADGRL2	chr1	82270000	82275400	14_ReprPCWk	LPHN2
chr1	84330711	84335000	6_TxWk	TTLL7	chr1	84330711	84333600	15_NA	TTLL7
chr1	84393800	84395000	5_Tx	TTLL7	chr1	84394200	84395000	11_EnhWk	TTLL7
chr1	84428000	84453000	15_NA	TTLL7	chr1	84430400	84461800	6_TxWk	TTLL7
chr1	84568400	84569600	9_EnhA1	PRKACB	chr1	84568600	84570000	11_EnhWk	PRKACB
chr1	84572200	84573000	10_EnhA2	PRKACB	chr1	84572000	84573200	6_TxWk	PRKACB
chr1	84765400	84766600	6_TxWk	SAMD13	chr1	84765400	84766800	11_EnhWk	SAMD13
chr1	84945800	84946400	2_TssFlnk	RPF1	chr1	84946000	84946600	4_TssFlnkD	RPF1
chr1	84967600	84969400	6_TxWk	GNG5	chr1	84968200	84969400	7_EnhG1	GNG5
chr1	84969400	84970200	2_TssFlnk	GNG5	chr1	84969400	84970000	8_EnhG2	GNG5
chr1	85038600	85039200	2_TssFlnk	CTBS	chr1	85038600	85039400	4_TssFlnkD	CTBS
chr1	85093913	85100703	15_NA	LINC01555	chr1	85093913	85100703	14_ReprPCWk	C1orf180
chr1	85155600	85156486	1_TssA	SSX2IP	chr1	85155400	85156400	2_TssFlnk	SSX2IP
chr1	85313800	85317400	6_TxWk	LPAR3	chr1	85313600	85317200	14_ReprPCWk	LPAR3
chr1	85320800	85327400	15_NA	LPAR3	chr1	85320800	85326800	14_ReprPCWk	LPAR3
chr1	85425400	85426200	13_ReprPC	MCOLN2	chr1	85425600	85426400	11_EnhWk	MCOLN2
chr1	85555600	85560800	14_ReprPCWk	WDR63	chr1	85554200	85562400	15_NA	WDR63
chr1	85665600	85666729	12_TssBiv	SYDE2	chr1	85665600	85666729	2_TssFlnk	SYDE2
chr1	85723000	85723800	5_Tx	C1orf52	chr1	85722800	85724000	7_EnhG1	C1orf52
chr1	85804400	85807800	6_TxWk	DDAH1	chr1	85804000	85806600	11_EnhWk	DDAH1
chr1	85824400	85824800	11_EnhWk	DDAH1	chr1	85824400	85825000	6_TxWk	DDAH1
chr1	85910800	85913200	6_TxWk	DDAH1	chr1	85909800	85912800	7_EnhG1	DDAH1
chr1	85961800	85963800	9_EnhA1	DDAH1	chr1	85962600	85964600	11_EnhWk	DDAH1
chr1	85970600	85972800	5_Tx	DDAH1	chr1	85970800	85973400	6_TxWk	DDAH1
chr1	85984400	85985600	6_TxWk	DDAH1	chr1	85984200	85985600	10_EnhA2	DDAH1
chr1	86014000	86016800	6_TxWk	DDAH1	chr1	86015000	86016800	11_EnhWk	DDAH1
chr1	86034800	86035800	9_EnhA1	DDAH1	chr1	86034800	86035400	11_EnhWk	DDAH1
chr1	86157600	86158800	6_TxWk	ZNHIT6	chr1	86157200	86159200	7_EnhG1	ZNHIT6
chr1	86172400	86172800	2_TssFlnk	ZNHIT6	chr1	86172400	86173000	8_EnhG2	ZNHIT6
chr1	86303200	86313000	14_ReprPCWk	COL24A1	chr1	86304200	86313000	15_NA	COL24A1
chr1	86313400	86315200	14_ReprPCWk	COL24A1	chr1	86313400	86315000	6_TxWk	COL24A1
chr1	86421200	86436800	14_ReprPCWk	COL24A1	chr1	86417200	86432400	15_NA	COL24A1
chr1	86616800	86617800	9_EnhA1	COL24A1	chr1	86616400	86617400	11_EnhWk	COL24A1
chr1	86618000	86621200	6_TxWk	COL24A1	chr1	86617400	86620600	14_ReprPCWk	COL24A1
chr1	86621200	86621800	2_TssFlnk	COL24A1	chr1	86620800	86621800	12_TssBiv	COL24A1
chr1	87378400	87379200	2_TssFlnk	SELENOF	chr1	87378200	87379000	4_TssFlnkD	SEP15
chr1	87798400	87799400	5_Tx	LMO4	chr1	87798400	87800000	7_EnhG1	LMO4
chr1	89268000	89268400	10_EnhA2	PKN2	chr1	89267800	89268400	7_EnhG1	PKN2
chr1	89268600	89269200	11_EnhWk	PKN2	chr1	89268800	89269200	6_TxWk	PKN2
chr1	89592000	89592200	10_EnhA2	GBP2	chr1	89592000	89592200	3_TssFlnkU	GBP2
chr1	89652000	89663400	14_ReprPCWk	GBP4	chr1	89646831	89663600	15_NA	GBP4
chr1	89829617	89851600	14_ReprPCWk	GBP6	chr1	89834400	89852020	15_NA	GBP6
chr1	90032600	90033200	11_EnhWk	LRRC8B	chr1	90032800	90033200	9_EnhA1	LRRC8B
chr1	90055000	90056000	10_EnhA2	LRRC8B	chr1	90055400	90056200	9_EnhA1	LRRC8B
chr1	90286000	90287400	2_TssFlnk	RP11-302M6.4	chr1	90286000	90288200	12_TssBiv	RP11-302M6.4
chr1	91853200	91866800	14_ReprPCWk	HFM1	chr1	91853200	91868400	15_NA	HFM1
chr1	91867600	91869600	13_ReprPC	HFM1	chr1	91868400	91869600	14_ReprPCWk	HFM1
chr1	91869600	91870426	12_TssBiv	HFM1	chr1	91869600	91870200	2_TssFlnk	HFM1
chr1	91977200	91978800	5_Tx	CDC7	chr1	91976800	91979400	6_TxWk	CDC7
chr1	92192600	92196400	14_ReprPCWk	TGFBR3	chr1	92193000	92196200	6_TxWk	TGFBR3
chr1	92217200	92225800	14_ReprPCWk	TGFBR3	chr1	92218000	92229000	6_TxWk	TGFBR3
chr1	92227200	92234200	14_ReprPCWk	TGFBR3	chr1	92229600	92234400	6_TxWk	TGFBR3
chr1	92235200	92240800	15_NA	TGFBR3	chr1	92235800	92239800	6_TxWk	TGFBR3
chr1	92278400	92294800	14_ReprPCWk	TGFBR3	chr1	92284200	92296000	15_NA	TGFBR3
chr1	92312000	92329200	15_NA	TGFBR3	chr1	92317800	92329200	6_TxWk	TGFBR3
chr1	92330000	92330600	11_EnhWk	TGFBR3	chr1	92330000	92330600	9_EnhA1	TGFBR3
chr1	92330600	92339800	14_ReprPCWk	TGFBR3	chr1	92330800	92337600	15_NA	TGFBR3
chr1	92339800	92344800	13_ReprPC	TGFBR3	chr1	92338600	92345000	14_ReprPCWk	TGFBR3
chr1	92344800	92349800	14_ReprPCWk	TGFBR3	chr1	92345000	92348800	15_NA	TGFBR3
chr1	92349800	92350000	13_ReprPC	TGFBR3	chr1	92349800	92350000	11_EnhWk	TGFBR3
chr1	92352400	92357000	15_NA	TGFBR3	chr1	92352400	92356400	6_TxWk	TGFBR3
chr1	92357000	92357800	11_EnhWk	TGFBR3	chr1	92357000	92357600	9_EnhA1	TGFBR3
chr1	92448000	92456400	14_ReprPCWk	BRDT	chr1	92448200	92458000	15_NA	BRDT
chr1	92495539	92496000	12_TssBiv	EPHX4	chr1	92495539	92496000	2_TssFlnk	EPHX4
chr1	92522600	92529093	14_ReprPCWk	EPHX4	chr1	92519800	92529093	15_NA	EPHX4
chr1	92711000	92711370	5_Tx	C1orf146	chr1	92710800	92711370	6_TxWk	C1orf146
chr1	93325200	93335400	15_NA	DIPK1A	chr1	93325200	93341400	6_TxWk	FAM69A
chr1	93416800	93425600	6_TxWk	DIPK1A	chr1	93418000	93425600	15_NA	FAM69A
chr1	93548000	93548200	7_EnhG1	MTF2	chr1	93548000	93548200	6_TxWk	MTF2
chr1	93580200	93580400	6_TxWk	MTF2	chr1	93580200	93580400	7_EnhG1	MTF2
chr1	93816000	93817200	7_EnhG1	DR1	chr1	93816400	93817200	6_TxWk	DR1
chr1	93817200	93819400	6_TxWk	DR1	chr1	93817200	93819400	7_EnhG1	DR1
chr1	93913688	93915200	1_TssA	FNBP1L	chr1	93913800	93915400	12_TssBiv	FNBP1L
chr1	93915400	93916800	11_EnhWk	FNBP1L	chr1	93915400	93916600	13_ReprPC	FNBP1L
chr1	94121800	94124200	5_Tx	BCAR3	chr1	94121000	94124800	7_EnhG1	BCAR3
chr1	94142400	94143800	7_EnhG1	BCAR3	chr1	94141800	94143400	8_EnhG2	BCAR3
chr1	94160200	94161600	10_EnhA2	BCAR3	chr1	94160200	94161400	11_EnhWk	BCAR3
chr1	94165600	94166600	10_EnhA2	BCAR3	chr1	94165800	94166400	11_EnhWk	BCAR3
chr1	94216800	94218200	9_EnhA1	BCAR3	chr1	94216800	94217800	11_EnhWk	BCAR3
chr1	94263800	94264400	10_EnhA2	BCAR3	chr1	94263400	94264400	11_EnhWk	BCAR3
chr1	94294000	94294600	10_EnhA2	BCAR3	chr1	94294200	94294600	9_EnhA1	BCAR3
chr1	94294600	94308200	15_NA	BCAR3	chr1	94294800	94304400	6_TxWk	BCAR3
chr1	94343400	94343600	11_EnhWk	DNTTIP2	chr1	94343400	94343600	8_EnhG2	DNTTIP2
chr1	94345400	94345474	2_TssFlnk	DNTTIP2	chr1	94345400	94345474	4_TssFlnkD	DNTTIP2
chr1	94458393	94459000	6_TxWk	ABCA4	chr1	94458393	94459000	14_ReprPCWk	ABCA4
chr1	94461600	94486600	15_NA	ABCA4	chr1	94460800	94478000	14_ReprPCWk	ABCA4
chr1	94492000	94499400	15_NA	ABCA4	chr1	94492400	94499400	14_ReprPCWk	ABCA4
chr1	94501800	94502600	15_NA	ABCA4	chr1	94502000	94502800	11_EnhWk	ABCA4
chr1	94511200	94514000	10_EnhA2	ABCA4	chr1	94511600	94513600	6_TxWk	ABCA4
chr1	94522400	94526800	6_TxWk	ABCA4	chr1	94522600	94527200	14_ReprPCWk	ABCA4
chr1	94681600	94682800	5_Tx	ARHGAP29	chr1	94681600	94683400	7_EnhG1	ARHGAP29
chr1	94731400	94732000	9_EnhA1	ARHGAP29	chr1	94731600	94732200	11_EnhWk	ARHGAP29
chr1	94735800	94737400	11_EnhWk	ARHGAP29	chr1	94736000	94737000	9_EnhA1	ARHGAP29
chr1	94739000	94740624	15_NA	ARHGAP29	chr1	94739000	94740624	6_TxWk	ARHGAP29
chr1	94884800	94885600	2_TssFlnk	ABCD3	chr1	94885000	94885600	4_TssFlnkD	ABCD3
chr1	94891600	94891800	4_TssFlnkD	ABCD3	chr1	94891600	94891800	2_TssFlnk	ABCD3
chr1	94969000	94971000	6_TxWk	ABCD3	chr1	94968200	94970400	5_Tx	ABCD3
chr1	95003600	95004800	6_TxWk	F3	chr1	95003800	95004600	8_EnhG2	F3
chr1	95286800	95289000	14_ReprPCWk	SLC44A3	chr1	95286800	95290200	13_ReprPC	SLC44A3
chr1	95312000	95319800	15_NA	SLC44A3	chr1	95311400	95318800	14_ReprPCWk	SLC44A3
chr1	95320000	95320800	1_TssA	SLC44A3	chr1	95320000	95320600	2_TssFlnk	SLC44A3
chr1	95320800	95321200	9_EnhA1	SLC44A3	chr1	95320800	95321200	11_EnhWk	SLC44A3
chr1	95378200	95380000	6_TxWk	CNN3	chr1	95377800	95379800	11_EnhWk	CNN3
chr1	95380000	95381600	11_EnhWk	CNN3	chr1	95380400	95382200	6_TxWk	CNN3
chr1	95384800	95385200	5_Tx	CNN3	chr1	95384800	95385200	8_EnhG2	CNN3
chr1	95387400	95389400	8_EnhG2	CNN3	chr1	95387600	95389600	4_TssFlnkD	CNN3
chr1	95389400	95390800	1_TssA	CNN3	chr1	95389600	95390600	8_EnhG2	CNN3
chr1	95439963	95441400	10_EnhA2	ALG14	chr1	95439963	95441200	9_EnhA1	ALG14
chr1	95487600	95488200	9_EnhA1	ALG14	chr1	95487600	95488600	11_EnhWk	ALG14
chr1	95500800	95502000	10_EnhA2	ALG14	chr1	95500200	95502000	11_EnhWk	ALG14
chr1	95508800	95526400	6_TxWk	ALG14	chr1	95509000	95524400	15_NA	ALG14
chr1	97189200	97190000	6_TxWk	PTBP2	chr1	97189400	97190000	7_EnhG1	PTBP2
chr1	97194600	97196200	5_Tx	PTBP2	chr1	97194000	97196400	7_EnhG1	PTBP2
chr1	97773400	97798200	15_NA	DPYD	chr1	97770600	97797800	6_TxWk	DPYD
chr1	97807200	97816400	15_NA	DPYD	chr1	97807200	97815800	6_TxWk	DPYD
chr1	98187400	98203800	15_NA	DPYD	chr1	98187800	98205000	6_TxWk	DPYD
chr1	98367200	98367400	2_TssFlnk	DPYD	chr1	98367200	98367400	11_EnhWk	DPYD
chr1	98371600	98372200	10_EnhA2	DPYD	chr1	98371600	98372200	9_EnhA1	DPYD
chr1	98372200	98372800	1_TssA	DPYD	chr1	98372200	98373000	3_TssFlnkU	DPYD
chr1	99134000	99134600	2_TssFlnk	SNX7	chr1	99134200	99134600	3_TssFlnkU	SNX7
chr1	99167800	99170000	6_TxWk	SNX7	chr1	99167400	99169600	5_Tx	SNX7
chr1	99205400	99226056	6_TxWk	SNX7	chr1	99207400	99226056	15_NA	SNX7
chr1	100151400	100151800	9_EnhA1	PALMD	chr1	100151200	100151800	10_EnhA2	PALMD
chr1	100436000	100436600	2_TssFlnk	SLC35A3	chr1	100436200	100436800	4_TssFlnkD	SLC35A3
chr1	100518400	100520600	5_Tx	MFSD14A	chr1	100517800	100519800	6_TxWk	HIAT1
chr1	100599200	100599800	2_TssFlnk	TRMT13	chr1	100599200	100600000	4_TssFlnkD	TRMT13
chr1	100599800	100600600	6_TxWk	TRMT13	chr1	100600000	100600600	11_EnhWk	TRMT13
chr1	100655200	100656000	10_EnhA2	DBT	chr1	100655200	100656000	11_EnhWk	DBT
chr1	100732800	100733000	8_EnhG2	RTCA	chr1	100732800	100733000	4_TssFlnkD	RTCA
chr1	100816400	100816800	2_TssFlnk	CDC14A	chr1	100816400	100816800	4_TssFlnkD	CDC14A
chr1	100824200	100825400	5_Tx	CDC14A	chr1	100824200	100826200	6_TxWk	CDC14A
chr1	100869000	100889200	6_TxWk	CDC14A	chr1	100871200	100893400	15_NA	CDC14A
chr1	101187800	101199400	15_NA	VCAM1	chr1	101187800	101199800	6_TxWk	VCAM1
chr1	101199600	101200400	9_EnhA1	VCAM1	chr1	101199800	101200800	10_EnhA2	VCAM1
chr1	101362600	101363200	2_TssFlnk	SLC30A7	chr1	101362600	101363200	4_TssFlnkD	SLC30A7
chr1	101363200	101363600	5_Tx	SLC30A7	chr1	101363200	101363600	11_EnhWk	SLC30A7
chr1	101412200	101415600	6_TxWk	SLC30A7	chr1	101410600	101414600	5_Tx	SLC30A7
chr1	101489800	101490400	6_TxWk	DPH5	chr1	101490000	101490400	11_EnhWk	DPH5
chr1	101490400	101490600	2_TssFlnk	DPH5	chr1	101490400	101490600	4_TssFlnkD	DPH5
chr1	101702444	101703800	1_TssA	S1PR1	chr1	101702800	101703800	2_TssFlnk	S1PR1
chr1	102271600	102289600	14_ReprPCWk	OLFM3	chr1	102268130	102283200	15_NA	OLFM3
chr1	103342023	103344600	6_TxWk	COL11A1	chr1	103342023	103344200	15_NA	COL11A1
chr1	103344800	103345000	7_EnhG1	COL11A1	chr1	103344800	103345000	10_EnhA2	COL11A1
chr1	103363600	103377800	6_TxWk	COL11A1	chr1	103363800	103385600	15_NA	COL11A1
chr1	107599600	107600400	2_TssFlnk	PRMT6	chr1	107599267	107600400	1_TssA	PRMT6
chr1	108371800	108372200	10_EnhA2	VAV3	chr1	108371600	108372200	11_EnhWk	VAV3
chr1	108479200	108479600	3_TssFlnkU	VAV3	chr1	108479200	108479800	4_TssFlnkD	VAV3
chr1	108483800	108495200	15_NA	VAV3	chr1	108483800	108493200	14_ReprPCWk	VAV3
chr1	108506400	108507766	2_TssFlnk	VAV3	chr1	108506200	108507766	12_TssBiv	VAV3
chr1	108719800	108720600	6_TxWk	SLC25A24	chr1	108719800	108720800	7_EnhG1	SLC25A24
chr1	109008600	109013624	13_ReprPC	NBPF6	chr1	109010200	109013624	14_ReprPCWk	NBPF6
chr1	109256000	109262000	14_ReprPCWk	FNDC7	chr1	109255279	109259600	15_NA	FNDC7
chr1	109290600	109291600	6_TxWk	STXBP3	chr1	109291000	109291600	5_Tx	STXBP3
chr1	109343600	109344600	6_TxWk	STXBP3	chr1	109343600	109344200	7_EnhG1	STXBP3
chr1	109397600	109401200	6_TxWk	AKNAD1	chr1	109398000	109401000	14_ReprPCWk	AKNAD1
chr1	109401200	109401600	9_EnhA1	AKNAD1	chr1	109401200	109401600	10_EnhA2	AKNAD1
chr1	109617400	109617800	2_TssFlnk	TAF13	chr1	109617200	109617800	4_TssFlnkD	TAF13
chr1	109632425	109633000	2_TssFlnk	TMEM167B	chr1	109632600	109633000	4_TssFlnkD	TMEM167B
chr1	109692800	109694200	10_EnhA2	KIAA1324	chr1	109692200	109694200	11_EnhWk	KIAA1324
chr1	109700400	109704000	15_NA	KIAA1324	chr1	109701400	109704200	14_ReprPCWk	KIAA1324
chr1	109704200	109705000	9_EnhA1	KIAA1324	chr1	109704400	109705000	3_TssFlnkU	KIAA1324
chr1	109705000	109705800	10_EnhA2	KIAA1324	chr1	109705200	109705800	11_EnhWk	KIAA1324
chr1	109732400	109739800	15_NA	KIAA1324	chr1	109733400	109739200	14_ReprPCWk	KIAA1324
chr1	109742200	109743600	6_TxWk	KIAA1324	chr1	109742000	109744000	14_ReprPCWk	KIAA1324
chr1	109744400	109749401	15_NA	KIAA1324	chr1	109744400	109749401	14_ReprPCWk	KIAA1324
chr1	109793400	109796800	14_ReprPCWk	CELSR2	chr1	109793000	109796000	13_ReprPC	CELSR2
chr1	109817800	109818372	9_EnhA1	CELSR2	chr1	109817800	109818372	11_EnhWk	CELSR2
chr1	109824400	109824800	4_TssFlnkD	PSRC1	chr1	109824400	109825000	3_TssFlnkU	PSRC1
chr1	109824800	109825800	2_TssFlnk	PSRC1	chr1	109825000	109825808	1_TssA	PSRC1
chr1	109843200	109849663	6_TxWk	MYBPHL	chr1	109843200	109849600	14_ReprPCWk	MYBPHL
chr1	109852192	109854000	5_Tx	SORT1	chr1	109852192	109854200	6_TxWk	SORT1
chr1	109927400	109930400	6_TxWk	SORT1	chr1	109927200	109929800	7_EnhG1	SORT1
chr1	109933000	109933200	10_EnhA2	SORT1	chr1	109933000	109933200	4_TssFlnkD	SORT1
chr1	109967600	109968000	2_TssFlnk	PSMA5	chr1	109967400	109968000	4_TssFlnkD	PSMA5
chr1	110026101	110026200	12_TssBiv	ATXN7L2	chr1	110026101	110026200	4_TssFlnkD	ATXN7L2
chr1	110027400	110027800	2_TssFlnk	ATXN7L2	chr1	110027400	110027800	4_TssFlnkD	ATXN7L2
chr1	110035400	110035426	6_TxWk	ATXN7L2	chr1	110035400	110035426	11_EnhWk	ATXN7L2
chr1	110082494	110086800	14_ReprPCWk	GPR61	chr1	110082494	110086200	13_ReprPC	GPR61
chr1	110159600	110160400	9_EnhA1	AMPD2	chr1	110159600	110160400	11_EnhWk	AMPD2
chr1	110167000	110168800	6_TxWk	AMPD2	chr1	110167600	110168800	7_EnhG1	AMPD2
chr1	110218800	110229800	15_NA	GSTM2	chr1	110218400	110229600	6_TxWk	GSTM2
chr1	110229800	110231400	2_TssFlnk	GSTM2	chr1	110230000	110231000	1_TssA	GSTM2
chr1	110530000	110532400	6_TxWk	AHCYL1	chr1	110530400	110532600	5_Tx	AHCYL1
chr1	110536400	110538200	6_TxWk	AHCYL1	chr1	110536200	110538800	7_EnhG1	AHCYL1
chr1	110540000	110542600	6_TxWk	AHCYL1	chr1	110538800	110542200	5_Tx	AHCYL1
chr1	110546000	110546200	4_TssFlnkD	AHCYL1	chr1	110546000	110546200	9_EnhA1	AHCYL1
chr1	110547600	110551600	6_TxWk	AHCYL1	chr1	110547200	110550200	11_EnhWk	AHCYL1
chr1	110576400	110576600	11_EnhWk	STRIP1	chr1	110576400	110576600	10_EnhA2	STRIP1
chr1	110756000	110768400	6_TxWk	KCNC4	chr1	110759200	110770200	14_ReprPCWk	KCNC4
chr1	110778200	110782400	15_NA	KCNC4	chr1	110779000	110782200	6_TxWk	KCNC4
chr1	110794400	110795600	14_ReprPCWk	KCNC4	chr1	110794400	110796400	13_ReprPC	KCNC4
chr1	110822000	110825722	15_NA	KCNC4	chr1	110822200	110825722	14_ReprPCWk	KCNC4
chr1	110885800	110889299	5_Tx	RBM15	chr1	110886200	110888400	7_EnhG1	RBM15
chr1	110949000	110949600	2_TssFlnk	LAMTOR5	chr1	110948800	110949400	4_TssFlnkD	LAMTOR5
chr1	111426200	111442550	14_ReprPCWk	CD53	chr1	111415775	111442550	15_NA	CD53
chr1	111681600	111682000	2_TssFlnk	DRAM2	chr1	111681600	111682000	4_TssFlnkD	DRAM2
chr1	111737600	111743800	15_NA	DENND2D	chr1	111739600	111745600	14_ReprPCWk	DENND2D
chr1	111766000	111770800	6_TxWk	CHI3L2	chr1	111763400	111770200	14_ReprPCWk	CHI3L2
chr1	111846200	111855400	13_ReprPC	CHIA	chr1	111842400	111852000	14_ReprPCWk	CHIA
chr1	111856200	111863188	13_ReprPC	CHIA	chr1	111852800	111863188	14_ReprPCWk	CHIA
chr1	112016414	112021134	15_NA	C1orf162	chr1	112016414	112021134	6_TxWk	C1orf162
chr1	112051000	112051400	10_EnhA2	TMIGD3	chr1	112051000	112051600	11_EnhWk	ADORA3
chr1	112051800	112056400	6_TxWk	TMIGD3	chr1	112051600	112058000	14_ReprPCWk	ADORA3
chr1	112135400	112135800	2_TssFlnk	RAP1A	chr1	112135400	112136000	4_TssFlnkD	RAP1A
chr1	112156400	112161800	15_NA	RAP1A	chr1	112152800	112161800	14_ReprPCWk	RAP1A
chr1	112161800	112162400	2_TssFlnk	RAP1A	chr1	112161800	112162200	4_TssFlnkD	RAP1A
chr1	112163400	112163800	2_TssFlnk	RAP1A	chr1	112163400	112164000	4_TssFlnkD	RAP1A
chr1	112286800	112297400	15_NA	INKA2	chr1	112289600	112297200	14_ReprPCWk	FAM212B
chr1	112299200	112299600	2_TssFlnk	DDX20	chr1	112299200	112299800	4_TssFlnkD	DDX20
chr1	112324600	112327000	14_ReprPCWk	KCND3	chr1	112324200	112326200	13_ReprPC	KCND3
chr1	112394800	112397200	14_ReprPCWk	KCND3	chr1	112395600	112397800	13_ReprPC	KCND3
chr1	112940000	112941200	2_TssFlnk	CTTNBP2NL	chr1	112940200	112941200	8_EnhG2	CTTNBP2NL
chr1	112941200	112941800	6_TxWk	CTTNBP2NL	chr1	112941200	112941600	5_Tx	CTTNBP2NL
chr1	112948600	112949600	10_EnhA2	CTTNBP2NL	chr1	112948600	112949400	6_TxWk	CTTNBP2NL
chr1	113009163	113009400	4_TssFlnkD	WNT2B	chr1	113009163	113009400	3_TssFlnkU	WNT2B
chr1	113045400	113050600	13_ReprPC	WNT2B	chr1	113046000	113050000	14_ReprPCWk	WNT2B
chr1	113052000	113054800	13_ReprPC	WNT2B	chr1	113052400	113055800	14_ReprPCWk	WNT2B
chr1	113054800	113061400	14_ReprPCWk	WNT2B	chr1	113056000	113062000	6_TxWk	WNT2B
chr1	113160200	113160600	2_TssFlnk	ST7L	chr1	113160200	113160800	4_TssFlnkD	ST7L
chr1	113164200	113164800	6_TxWk	CAPZA1	chr1	113164200	113164600	7_EnhG1	CAPZA1
chr1	113215763	113216600	6_TxWk	MOV10	chr1	113215763	113216400	11_EnhWk	MOV10
chr1	113253200	113254800	13_ReprPC	PPM1J	chr1	113252616	113255000	14_ReprPCWk	PPM1J
chr1	114205400	114206800	10_EnhA2	MAGI3	chr1	114205800	114207200	11_EnhWk	MAGI3
chr1	114300000	114300200	2_TssFlnk	PHTF1	chr1	114300000	114300200	8_EnhG2	PHTF1
chr1	114356433	114402600	15_NA	PTPN22	chr1	114356433	114388400	6_TxWk	PTPN22
chr1	114413600	114414200	2_TssFlnk	PTPN22	chr1	114413600	114414000	11_EnhWk	PTPN22
chr1	114448600	114449200	2_TssFlnk	DCLRE1B	chr1	114448600	114449000	4_TssFlnkD	DCLRE1B
chr1	114454800	114455400	9_EnhA1	DCLRE1B	chr1	114454800	114455800	7_EnhG1	DCLRE1B
chr1	114456200	114456400	10_EnhA2	DCLRE1B	chr1	114456200	114456400	11_EnhWk	DCLRE1B
chr1	114522063	114522800	1_TssA	OLFML3	chr1	114522063	114522600	3_TssFlnkU	OLFML3
chr1	114631913	114634200	14_ReprPCWk	SYT6	chr1	114631913	114635400	13_ReprPC	SYT6
chr1	114689200	114693200	14_ReprPCWk	SYT6	chr1	114688600	114692400	13_ReprPC	SYT6
chr1	115297600	115298800	8_EnhG2	CSDE1	chr1	115297600	115298400	4_TssFlnkD	CSDE1
chr1	115321800	115322000	6_TxWk	SIKE1	chr1	115321800	115322000	8_EnhG2	SIKE1
chr1	115322200	115322800	2_TssFlnk	SIKE1	chr1	115322000	115322600	4_TssFlnkD	SIKE1
chr1	115592000	115598800	13_ReprPC	TSPAN2	chr1	115590632	115596800	14_ReprPCWk	TSPAN2
chr1	115609600	115612800	9_EnhA1	TSPAN2	chr1	115609800	115612400	11_EnhWk	TSPAN2
chr1	115616000	115616600	11_EnhWk	TSPAN2	chr1	115615800	115616600	13_ReprPC	TSPAN2
chr1	115616600	115619000	13_ReprPC	TSPAN2	chr1	115616600	115619200	14_ReprPCWk	TSPAN2
chr1	115865000	115866400	10_EnhA2	NGF	chr1	115865200	115866400	11_EnhWk	NGF
chr1	115877000	115879800	14_ReprPCWk	NGF	chr1	115877800	115880000	13_ReprPC	NGF
chr1	116198000	116198400	6_TxWk	VANGL1	chr1	116198000	116198600	5_Tx	VANGL1
chr1	116210600	116211400	6_TxWk	VANGL1	chr1	116210800	116211400	7_EnhG1	VANGL1
chr1	116211600	116212400	6_TxWk	VANGL1	chr1	116211400	116212200	9_EnhA1	VANGL1
chr1	116220000	116222400	7_EnhG1	VANGL1	chr1	116219600	116222000	11_EnhWk	VANGL1
chr1	116260000	116269800	15_NA	CASQ2	chr1	116258400	116269800	14_ReprPCWk	CASQ2
chr1	116269800	116270000	10_EnhA2	CASQ2	chr1	116269800	116270000	11_EnhWk	CASQ2
chr1	116302200	116310800	15_NA	CASQ2	chr1	116300000	116310600	14_ReprPCWk	CASQ2
chr1	116519119	116520600	1_TssA	SLC22A15	chr1	116519400	116520600	4_TssFlnkD	SLC22A15
chr1	116587000	116606800	6_TxWk	SLC22A15	chr1	116580000	116607000	15_NA	SLC22A15
chr1	116611400	116612675	6_TxWk	SLC22A15	chr1	116611400	116612675	15_NA	SLC22A15
chr1	116657800	116658400	10_EnhA2	MAB21L3	chr1	116657400	116658400	11_EnhWk	MAB21L3
chr1	116665200	116665800	10_EnhA2	MAB21L3	chr1	116665200	116665800	11_EnhWk	MAB21L3
chr1	116665800	116666000	9_EnhA1	MAB21L3	chr1	116665800	116666000	4_TssFlnkD	MAB21L3
chr1	117064000	117064400	10_EnhA2	CD58	chr1	117064000	117064400	11_EnhWk	CD58
chr1	117118000	117126200	15_NA	IGSF3	chr1	117120800	117127600	14_ReprPCWk	IGSF3
chr1	117168800	117169600	13_ReprPC	IGSF3	chr1	117168400	117169600	14_ReprPCWk	IGSF3
chr1	117169600	117171600	14_ReprPCWk	IGSF3	chr1	117169600	117172000	13_ReprPC	IGSF3
chr1	117184800	117186400	11_EnhWk	IGSF3	chr1	117185000	117186800	12_TssBiv	IGSF3
chr1	117237000	117239000	6_TxWk	C1orf137	chr1	117236800	117239200	11_EnhWk	C1orf137
chr1	117495000	117504800	15_NA	PTGFRN	chr1	117497400	117503800	6_TxWk	PTGFRN
chr1	117635000	117635200	10_EnhA2	TTF2	chr1	117635000	117635200	11_EnhWk	TTF2
chr1	117686209	117689000	15_NA	VTCN1	chr1	117686209	117688800	14_ReprPCWk	VTCN1
chr1	117728600	117731000	13_ReprPC	VTCN1	chr1	117729200	117730800	14_ReprPCWk	VTCN1
chr1	117913600	117914600	10_EnhA2	MAN1A2	chr1	117913600	117914200	4_TssFlnkD	MAN1A2
chr1	117914600	117943200	15_NA	MAN1A2	chr1	117914400	117935200	6_TxWk	MAN1A2
chr1	118016200	118020000	6_TxWk	MAN1A2	chr1	118017600	118020400	5_Tx	MAN1A2
chr1	118473000	118473800	2_TssFlnk	WDR3	chr1	118473200	118474000	4_TssFlnkD	WDR3
chr1	118577000	118597200	14_ReprPCWk	SPAG17	chr1	118582600	118606000	15_NA	SPAG17
chr1	118665400	118666400	10_EnhA2	SPAG17	chr1	118665400	118666000	11_EnhWk	SPAG17
chr1	119506000	119507000	11_EnhWk	TBX15	chr1	119506000	119506800	9_EnhA1	TBX15
chr1	119528000	119528400	2_TssFlnk	TBX15	chr1	119528000	119528400	3_TssFlnkU	TBX15
chr1	119531200	119532179	15_NA	TBX15	chr1	119531200	119532179	10_EnhA2	TBX15
chr1	119589600	119590000	3_TssFlnkU	WARS2	chr1	119589600	119590000	2_TssFlnk	WARS2
chr1	119600200	119618200	15_NA	WARS2	chr1	119590400	119618000	6_TxWk	WARS2
chr1	119624800	119636000	15_NA	WARS2	chr1	119628000	119639600	6_TxWk	WARS2
chr1	119643200	119644000	11_EnhWk	WARS2	chr1	119643400	119644400	9_EnhA1	WARS2
chr1	119645400	119664200	15_NA	WARS2	chr1	119646000	119674600	6_TxWk	WARS2
chr1	120170000	120172800	14_ReprPCWk	ZNF697	chr1	120170200	120173800	6_TxWk	ZNF697
chr1	120174000	120174600	2_TssFlnk	ZNF697	chr1	120174000	120174800	4_TssFlnkD	ZNF697
chr1	120175000	120188000	15_NA	ZNF697	chr1	120175400	120188600	6_TxWk	ZNF697
chr1	120190200	120190396	2_TssFlnk	ZNF697	chr1	120190200	120190396	1_TssA	ZNF697
chr1	120218400	120219400	14_ReprPCWk	PHGDH	chr1	120218600	120219600	11_EnhWk	PHGDH
chr1	120254400	120255000	2_TssFlnk	PHGDH	chr1	120254600	120255200	1_TssA	PHGDH
chr1	120256600	120268600	15_NA	PHGDH	chr1	120257200	120267000	6_TxWk	PHGDH
chr1	120300200	120305200	14_ReprPCWk	HMGCS2	chr1	120298400	120303400	13_ReprPC	HMGCS2
chr1	120352000	120354283	6_TxWk	REG4	chr1	120352000	120353800	14_ReprPCWk	REG4
chr1	120522000	120524200	6_TxWk	NOTCH2	chr1	120521600	120524000	5_Tx	NOTCH2
chr1	120525400	120527200	6_TxWk	NOTCH2	chr1	120526000	120527200	5_Tx	NOTCH2
chr1	120561800	120562200	4_TssFlnkD	NOTCH2	chr1	120561800	120562200	3_TssFlnkU	NOTCH2
chr1	120562200	120563200	11_EnhWk	NOTCH2	chr1	120562200	120562800	9_EnhA1	NOTCH2
chr1	120563200	120566200	6_TxWk	NOTCH2	chr1	120562800	120565200	7_EnhG1	NOTCH2
chr1	120570800	120572600	7_EnhG1	NOTCH2	chr1	120570200	120572200	5_Tx	NOTCH2
chr1	120572600	120573400	9_EnhA1	NOTCH2	chr1	120572200	120573200	7_EnhG1	NOTCH2
chr1	120597800	120600800	11_EnhWk	NOTCH2	chr1	120598400	120601000	7_EnhG1	NOTCH2
chr1	120609200	120610800	3_TssFlnkU	NOTCH2	chr1	120609200	120610600	4_TssFlnkD	NOTCH2
chr1	120839000	120839800	1_TssA	FAM72B	chr1	120839200	120839800	2_TssFlnk	FAM72B
chr1	120926979	120930200	14_ReprPCWk	FCGR1B	chr1	120927200	120929400	13_ReprPC	FCGR1B
chr1	143896452	143904000	15_NA	FAM72D	chr1	143896452	143903400	6_TxWk	FAM72D
chr1	143912400	143913000	1_TssA	FAM72D	chr1	143912400	143912800	2_TssFlnk	FAM72D
chr1	144363462	144364246	13_ReprPC	PPIAL4B	chr1	144363462	144364246	14_ReprPCWk	PPIAL4B
chr1	144480400	144491200	14_ReprPCWk	AL592284.1	chr1	144484200	144491200	15_NA	AL592284.1
chr1	144506600	144507000	10_EnhA2	AL592284.1	chr1	144506600	144507000	9_EnhA1	AL592284.1
chr1	144507600	144517800	14_ReprPCWk	AL592284.1	chr1	144508400	144517600	6_TxWk	AL592284.1
chr1	144836157	144836600	9_EnhA1	PDE4DIP	chr1	144836157	144836600	7_EnhG1	PDE4DIP
chr1	144929600	144931200	1_TssA	PDE4DIP	chr1	144930000	144931000	3_TssFlnkU	PDE4DIP
chr1	144933200	144933400	10_EnhA2	PDE4DIP	chr1	144933200	144933400	9_EnhA1	PDE4DIP
chr1	144933400	144934400	6_TxWk	PDE4DIP	chr1	144933400	144934600	11_EnhWk	PDE4DIP
chr1	144935200	144936400	6_TxWk	PDE4DIP	chr1	144935600	144936600	7_EnhG1	PDE4DIP
chr1	144936600	144937000	9_EnhA1	PDE4DIP	chr1	144936600	144937000	8_EnhG2	PDE4DIP
chr1	144955600	144957400	6_TxWk	PDE4DIP	chr1	144956000	144957600	5_Tx	PDE4DIP
chr1	144964000	144965200	6_TxWk	PDE4DIP	chr1	144964000	144966000	7_EnhG1	PDE4DIP
chr1	144994400	144995000	3_TssFlnkU	PDE4DIP	chr1	144994400	144994800	8_EnhG2	PDE4DIP
chr1	145034200	145036200	11_EnhWk	PDE4DIP	chr1	145033800	145037000	7_EnhG1	PDE4DIP
chr1	145039200	145040200	1_TssA	PDE4DIP	chr1	145039000	145040000	3_TssFlnkU	PDE4DIP
chr1	145049000	145054000	14_ReprPCWk	PDE4DIP	chr1	145048800	145052200	6_TxWk	PDE4DIP
chr1	145057800	145059200	11_EnhWk	PDE4DIP	chr1	145057800	145059800	7_EnhG1	PDE4DIP
chr1	145075200	145076186	4_TssFlnkD	PDE4DIP	chr1	145074600	145076186	3_TssFlnkU	PDE4DIP
chr1	145459800	145460200	11_EnhWk	POLR3GL	chr1	145459800	145460200	9_EnhA1	POLR3GL
chr1	145474800	145475646	6_TxWk	ANKRD34A	chr1	145475000	145475646	11_EnhWk	ANKRD34A
chr1	145478200	145479200	2_TssFlnk	LIX1L	chr1	145478000	145479000	4_TssFlnkD	LIX1L
chr1	145479600	145481600	6_TxWk	LIX1L	chr1	145479400	145481000	7_EnhG1	LIX1L
chr1	145524891	145525400	1_TssA	ITGA10	chr1	145524891	145525600	8_EnhG2	ITGA10
chr1	145542200	145542800	9_EnhA1	ITGA10	chr1	145542400	145542800	3_TssFlnkU	ITGA10
chr1	145589000	145589400	1_TssA	NUDT17	chr1	145588800	145589400	3_TssFlnkU	NUDT17
chr1	145589400	145589439	2_TssFlnk	NUDT17	chr1	145589400	145589439	4_TssFlnkD	NUDT17
chr1	145609600	145610200	2_TssFlnk	POLR3C	chr1	145609600	145610000	4_TssFlnkD	POLR3C
chr1	145617600	145621000	6_TxWk	RNF115	chr1	145616600	145621200	11_EnhWk	RNF115
chr1	145641000	145648200	5_Tx	RNF115	chr1	145640600	145646000	6_TxWk	RNF115
chr1	145683800	145684400	6_TxWk	RNF115	chr1	145683800	145684600	7_EnhG1	RNF115
chr1	145714200	145714600	11_EnhWk	CD160	chr1	145714200	145714800	9_EnhA1	CD160
chr1	145727000	145728600	6_TxWk	PDZK1	chr1	145727400	145729400	11_EnhWk	PDZK1
chr1	145739400	145743600	6_TxWk	PDZK1	chr1	145739200	145743000	14_ReprPCWk	PDZK1
chr1	145822600	145825000	5_Tx	GPR89A	chr1	145823200	145824800	6_TxWk	GPR89A
chr1	146081200	146081600	2_TssFlnk	NBPF11	chr1	146081200	146081800	4_TssFlnkD	NBPF11
chr1	146374400	146375400	2_TssFlnk	NBPF12	chr1	146374800	146375600	4_TssFlnkD	NBPF12
chr1	146649000	146649400	11_EnhWk	FMO5	chr1	146648800	146649400	10_EnhA2	FMO5
chr1	146649400	146650000	2_TssFlnk	FMO5	chr1	146649600	146650000	4_TssFlnkD	FMO5
chr1	146697600	146713800	15_NA	FMO5	chr1	146697600	146708800	14_ReprPCWk	FMO5
chr1	146715400	146716000	2_TssFlnk	CHD1L	chr1	146715600	146716000	4_TssFlnkD	CHD1L
chr1	146745600	146746000	11_EnhWk	CHD1L	chr1	146745600	146746200	7_EnhG1	CHD1L
chr1	146763800	146765000	9_EnhA1	CHD1L	chr1	146763600	146765400	7_EnhG1	CHD1L
chr1	147013182	147013800	1_TssA	BCL9	chr1	147013400	147013800	2_TssFlnk	BCL9
chr1	147013800	147014400	2_TssFlnk	BCL9	chr1	147013800	147014200	4_TssFlnkD	BCL9
chr1	147401200	147401600	2_TssFlnk	GPR89B	chr1	147401200	147401800	4_TssFlnkD	GPR89B
chr1	147954635	147955419	13_ReprPC	PPIAL4A	chr1	147954635	147955419	14_ReprPCWk	PPIAL4A
chr1	148558000	148558200	4_TssFlnkD	NBPF15	chr1	148558000	148558200	8_EnhG2	NBPF15
chr1	148574400	148576400	5_Tx	NBPF15	chr1	148574200	148577400	6_TxWk	NBPF15
chr1	149400131	149400542	2_TssFlnk	HIST2H3PS2	chr1	149400131	149400400	1_TssA	HIST2H3PS2
chr1	149439000	149439600	11_EnhWk	FAM72C	chr1	149439200	149439600	9_EnhA1	FAM72C
chr1	149553003	149553787	13_ReprPC	PPIAL4C	chr1	149553003	149553787	14_ReprPCWk	PPIAL4C
chr1	149763800	149764000	11_EnhWk	FCGR1A	chr1	149763800	149764074	2_TssFlnk	FCGR1A
chr1	149763800	149764000	11_EnhWk	FCGR1A	chr1	149763800	149764074	2_TssFlnk	FCGR1A
chr1	149778200	149782800	6_TxWk	HIST2H2BF	chr1	149778600	149783000	14_ReprPCWk	HIST2H2BF
chr1	149805800	149811200	15_NA	HIST2H4A	chr1	149806000	149811339	6_TxWk	HIST2H4A
chr1	149811200	149811400	2_TssFlnk	HIST2H3C	chr1	149811110	149811400	6_TxWk	HIST2H3C
chr1	149822643	149823191	1_TssA	HIST2H2AA3	chr1	149822800	149823191	3_TssFlnkU	HIST2H2AA4
chr1	149825607	149825800	2_TssFlnk	HIST2H3A	chr1	149825600	149825836	6_TxWk	HIST2H3A
chr1	149825800	149831400	15_NA	HIST2H4B	chr1	149825607	149831000	6_TxWk	HIST2H4B
chr1	149900543	149900600	2_TssFlnk	MTMR11	chr1	149900543	149900600	4_TssFlnkD	MTMR11
chr1	149907800	149908791	2_TssFlnk	MTMR11	chr1	149907800	149908400	4_TssFlnkD	MTMR11
chr1	149909705	149911000	6_TxWk	OTUD7B	chr1	149909705	149911200	11_EnhWk	OTUD7B
chr1	149934800	149935800	6_TxWk	OTUD7B	chr1	149934400	149935600	7_EnhG1	OTUD7B
chr1	149958000	149958600	3_TssFlnkU	OTUD7B	chr1	149958000	149958600	4_TssFlnkD	OTUD7B
chr1	149972600	149974200	6_TxWk	OTUD7B	chr1	149972600	149974800	7_EnhG1	OTUD7B
chr1	149980200	149980600	6_TxWk	OTUD7B	chr1	149980000	149980600	11_EnhWk	OTUD7B
chr1	150040400	150041000	2_TssFlnk	VPS45	chr1	150040200	150041000	4_TssFlnkD	VPS45
chr1	150041000	150041200	4_TssFlnkD	VPS45	chr1	150041000	150041200	11_EnhWk	VPS45
chr1	150240000	150240200	8_EnhG2	APH1A	chr1	150240000	150240200	4_TssFlnkD	APH1A
chr1	150242000	150245200	15_NA	C1orf54	chr1	150242400	150244400	6_TxWk	C1orf54
chr1	150267200	150267800	6_TxWk	MRPS21	chr1	150267200	150267600	11_EnhWk	MRPS21
chr1	150294600	150294800	4_TssFlnkD	PRPF3	chr1	150294600	150294800	2_TssFlnk	PRPF3
chr1	150294800	150295400	2_TssFlnk	PRPF3	chr1	150294800	150295200	4_TssFlnkD	PRPF3
chr1	150335567	150335600	2_TssFlnk	RPRD2	chr1	150335567	150335600	11_EnhWk	RPRD2
chr1	150460800	150461000	2_TssFlnk	TARS2	chr1	150460800	150461000	11_EnhWk	TARS2
chr1	150485600	150486265	7_EnhG1	ECM1	chr1	150485400	150486000	11_EnhWk	ECM1
chr1	150523000	150524400	6_TxWk	AL356356.1	chr1	150523400	150524367	11_EnhWk	AL356356.1
chr1	150523000	150524367	6_TxWk	AL356356.1	chr1	150523400	150524367	11_EnhWk	AL356356.1
chr1	150532400	150533200	7_EnhG1	ADAMTSL4	chr1	150532000	150533200	11_EnhWk	ADAMTSL4
chr1	150533200	150533400	8_EnhG2	ADAMTSL4	chr1	150533200	150533400	4_TssFlnkD	ADAMTSL4
chr1	150586800	150587800	6_TxWk	ENSA	chr1	150586800	150588000	7_EnhG1	ENSA
chr1	150672600	150678200	13_ReprPC	HORMAD1	chr1	150670600	150677600	14_ReprPCWk	HORMAD1
chr1	150738200	150738400	2_TssFlnk	CTSS	chr1	150738200	150738433	15_NA	CTSS
chr1	150945600	150946200	2_TssFlnk	CERS2	chr1	150945400	150946000	4_TssFlnkD	CERS2
chr1	150979600	150980400	10_EnhA2	MINDY1	chr1	150979800	150980400	11_EnhWk	FAM63A
chr1	150980400	150980851	1_TssA	MINDY1	chr1	150980400	150980800	4_TssFlnkD	FAM63A
chr1	151019600	151020076	2_TssFlnk	BNIPL	chr1	151019600	151020000	11_EnhWk	BNIPL
chr1	151020216	151020800	2_TssFlnk	C1orf56	chr1	151020216	151020800	1_TssA	C1orf56
chr1	151021000	151021600	2_TssFlnk	C1orf56	chr1	151020800	151021400	4_TssFlnkD	C1orf56
chr1	151104161	151106000	6_TxWk	SEMA6C	chr1	151104161	151105600	14_ReprPCWk	SEMA6C
chr1	151108400	151115200	6_TxWk	SEMA6C	chr1	151106600	151115000	14_ReprPCWk	SEMA6C
chr1	151115200	151116400	11_EnhWk	SEMA6C	chr1	151115400	151116200	12_TssBiv	SEMA6C
chr1	151116400	151117600	6_TxWk	SEMA6C	chr1	151116200	151117600	13_ReprPC	SEMA6C
chr1	151117600	151119104	2_TssFlnk	SEMA6C	chr1	151117600	151118800	12_TssBiv	SEMA6C
chr1	151161200	151161800	2_TssFlnk	VPS72	chr1	151161000	151161600	4_TssFlnkD	VPS72
chr1	151163400	151167797	15_NA	VPS72	chr1	151163400	151167200	6_TxWk	VPS72
chr1	151252500	151253400	14_ReprPCWk	ZNF687-AS1	chr1	151252500	151253400	6_TxWk	RP11-126K1.2
chr1	151253400	151254000	2_TssFlnk	ZNF687-AS1	chr1	151253400	151253800	4_TssFlnkD	RP11-126K1.2
chr1	151255800	151256400	4_TssFlnkD	ZNF687	chr1	151255800	151256200	2_TssFlnk	ZNF687
chr1	151256600	151257400	6_TxWk	ZNF687	chr1	151256400	151257200	11_EnhWk	ZNF687
chr1	151297800	151298400	7_EnhG1	PI4KB	chr1	151298000	151298400	8_EnhG2	PI4KB
chr1	151338200	151342600	6_TxWk	SELENBP1	chr1	151336778	151342400	5_Tx	SELENBP1
chr1	151373600	151374420	5_Tx	PSMB4	chr1	151373800	151374400	7_EnhG1	PSMB4
chr1	151409400	151410800	6_TxWk	POGZ	chr1	151409600	151410600	7_EnhG1	POGZ
chr1	151429600	151430400	2_TssFlnk	POGZ	chr1	151429600	151430200	4_TssFlnkD	POGZ
chr1	151502000	151507400	15_NA	CGN	chr1	151503200	151507800	14_ReprPCWk	CGN
chr1	151510600	151511168	10_EnhA2	CGN	chr1	151510400	151511168	11_EnhWk	CGN
chr1	151512781	151514600	1_TssA	TUFT1	chr1	151512781	151514000	2_TssFlnk	TUFT1
chr1	151515800	151516200	9_EnhA1	TUFT1	chr1	151515800	151516200	11_EnhWk	TUFT1
chr1	151516800	151518200	5_Tx	TUFT1	chr1	151516200	151518200	6_TxWk	TUFT1
chr1	151519400	151520000	3_TssFlnkU	TUFT1	chr1	151519400	151520000	4_TssFlnkD	TUFT1
chr1	151520000	151520800	9_EnhA1	TUFT1	chr1	151520000	151521000	11_EnhWk	TUFT1
chr1	151586200	151586400	11_EnhWk	SNX27	chr1	151586200	151586400	4_TssFlnkD	SNX27
chr1	151736800	151743808	15_NA	OAZ3	chr1	151737200	151743808	14_ReprPCWk	OAZ3
chr1	151742583	151754000	15_NA	TDRKH	chr1	151742583	151756000	14_ReprPCWk	TDRKH
chr1	151861000	151863200	5_Tx	THEM4	chr1	151861400	151863000	6_TxWk	THEM4
chr1	151863200	151864000	6_TxWk	THEM4	chr1	151863000	151864200	5_Tx	THEM4
chr1	151864400	151866200	6_TxWk	THEM4	chr1	151864200	151866200	7_EnhG1	THEM4
chr1	152010000	152010200	15_NA	S100A11	chr1	152010000	152010200	11_EnhWk	S100A11
chr1	152019600	152019800	4_TssFlnkD	S100A11	chr1	152019600	152019800	9_EnhA1	S100A11
chr1	152078793	152080400	14_ReprPCWk	TCHH	chr1	152078793	152080800	13_ReprPC	TCHH
chr1	152126071	152131704	15_NA	RPTN	chr1	152126071	152131400	14_ReprPCWk	RPTN
chr1	152487000	152487400	14_ReprPCWk	CRCT1	chr1	152486978	152487600	13_ReprPC	CRCT1
chr1	152487800	152488400	2_TssFlnk	CRCT1	chr1	152487600	152488400	12_TssBiv	CRCT1
chr1	152488400	152488486	14_ReprPCWk	CRCT1	chr1	152488400	152488486	13_ReprPC	CRCT1
chr1	152551857	152552980	15_NA	LCE3D	chr1	152551857	152552980	6_TxWk	LCE3D
chr1	152595400	152595579	1_TssA	LCE3A	chr1	152595310	152595579	11_EnhWk	LCE3A
chr1	152670840	152671918	14_ReprPCWk	LCE2A	chr1	152670840	152671918	15_NA	LCE2A
chr1	152691998	152692905	13_ReprPC	C1orf68	chr1	152691998	152692905	14_ReprPCWk	C1orf68
chr1	152730506	152734529	14_ReprPCWk	KPRP	chr1	152730506	152734529	15_NA	KPRP
chr1	152815344	152816459	14_ReprPCWk	LCE6A	chr1	152815344	152816459	15_NA	LCE6A
chr1	152850793	152857523	14_ReprPCWk	SMCP	chr1	152850793	152857200	15_NA	SMCP
chr1	152943600	152945050	14_ReprPCWk	SPRR4	chr1	152943142	152945050	15_NA	SPRR4
chr1	152956557	152958289	14_ReprPCWk	SPRR1A	chr1	152956557	152958289	15_NA	SPRR1A
chr1	153003678	153005376	14_ReprPCWk	SPRR1B	chr1	153003678	153005376	15_NA	SPRR1B
chr1	153012201	153014407	14_ReprPCWk	SPRR2D	chr1	153012201	153014407	15_NA	SPRR2D
chr1	153028589	153030013	14_ReprPCWk	SPRR2A	chr1	153028589	153030013	15_NA	SPRR2A
chr1	153122058	153123000	14_ReprPCWk	SPRR2G	chr1	153122058	153123345	15_NA	SPRR2G
chr1	153175919	153177596	14_ReprPCWk	LELP1	chr1	153175919	153177596	15_NA	LELP1
chr1	153516200	153517400	8_EnhG2	S100A4	chr1	153516089	153517000	4_TssFlnkD	S100A4
chr1	153517400	153518600	1_TssA	S100A4	chr1	153517000	153518800	3_TssFlnkU	S100A4
chr1	153521800	153522612	11_EnhWk	S100A4	chr1	153521600	153522400	9_EnhA1	S100A4
chr1	153605800	153606000	4_TssFlnkD	S100A13	chr1	153605800	153606000	11_EnhWk	S100A13
chr1	153642200	153643400	1_TssA	ILF2	chr1	153642000	153643000	8_EnhG2	ILF2
chr1	153746830	153747600	6_TxWk	SLC27A3	chr1	153747000	153747600	11_EnhWk	SLC27A3
chr1	153747600	153748800	2_TssFlnk	SLC27A3	chr1	153747600	153748600	4_TssFlnkD	SLC27A3
chr1	153853600	153854800	3_TssFlnkU	GATAD2B	chr1	153853600	153855000	4_TssFlnkD	GATAD2B
chr1	153893400	153894000	11_EnhWk	GATAD2B	chr1	153893400	153894000	2_TssFlnk	GATAD2B
chr1	153931575	153931600	2_TssFlnk	SLC39A1	chr1	153931575	153931600	11_EnhWk	SLC39A1
chr1	153936400	153937200	3_TssFlnkU	SLC39A1	chr1	153936600	153937200	4_TssFlnkD	SLC39A1
chr1	153937200	153937400	10_EnhA2	SLC39A1	chr1	153937200	153937400	11_EnhWk	SLC39A1
chr1	153938800	153939200	2_TssFlnk	SLC39A1	chr1	153938800	153939400	4_TssFlnkD	SLC39A1
chr1	153948400	153949000	8_EnhG2	JTB	chr1	153948400	153948800	7_EnhG1	JTB
chr1	153949000	153949800	2_TssFlnk	JTB	chr1	153949200	153950164	1_TssA	JTB
chr1	153957000	153957800	2_TssFlnk	RAB13	chr1	153956800	153957600	8_EnhG2	RAB13
chr1	154007000	154020000	14_ReprPCWk	NUP210L	chr1	154007600	154015600	15_NA	NUP210L
chr1	154030200	154041800	13_ReprPC	NUP210L	chr1	154028200	154039600	14_ReprPCWk	NUP210L
chr1	154153800	154154400	2_TssFlnk	TPM3	chr1	154153600	154154600	4_TssFlnkD	TPM3
chr1	154163600	154164200	2_TssFlnk	TPM3	chr1	154163800	154164200	14_ReprPCWk	TPM3
chr1	154165600	154167000	11_EnhWk	TPM3	chr1	154165400	154167124	13_ReprPC	TPM3
chr1	154195600	154196400	7_EnhG1	UBAP2L	chr1	154195600	154196400	11_EnhWk	UBAP2L
chr1	154243800	154243986	8_EnhG2	UBAP2L	chr1	154243800	154243986	11_EnhWk	UBAP2L
chr1	154245800	154246000	2_TssFlnk	HAX1	chr1	154245800	154246000	4_TssFlnkD	HAX1
chr1	154301600	154302200	6_TxWk	ATP8B2	chr1	154301600	154302200	7_EnhG1	ATP8B2
chr1	154379400	154387600	13_ReprPC	IL6R	chr1	154381200	154390800	6_TxWk	IL6R
chr1	154391800	154392400	11_EnhWk	IL6R	chr1	154392000	154392600	9_EnhA1	IL6R
chr1	154408600	154409000	12_TssBiv	IL6R	chr1	154408400	154409000	5_Tx	IL6R
chr1	154409000	154415000	13_ReprPC	IL6R	chr1	154409000	154417600	6_TxWk	IL6R
chr1	154420200	154426000	13_ReprPC	IL6R	chr1	154419200	154425400	6_TxWk	IL6R
chr1	154426000	154432000	14_ReprPCWk	IL6R	chr1	154426000	154435000	6_TxWk	IL6R
chr1	154439000	154441926	13_ReprPC	IL6R	chr1	154439200	154441926	15_NA	IL6R
chr1	154499200	154502800	13_ReprPC	TDRD10	chr1	154497800	154503800	14_ReprPCWk	TDRD10
chr1	154530800	154531504	2_TssFlnk	UBE2Q1	chr1	154530400	154531504	1_TssA	UBE2Q1
chr1	154581400	154581800	3_TssFlnkU	ADAR	chr1	154581400	154581800	4_TssFlnkD	ADAR
chr1	154582200	154593800	15_NA	ADAR	chr1	154582200	154597000	6_TxWk	ADAR
chr1	154585067	154585190	15_NA	AL606500.1	chr1	154585067	154585190	6_TxWk	AL606500.1
chr1	154783400	154786000	6_TxWk	KCNN3	chr1	154783400	154785000	14_ReprPCWk	KCNN3
chr1	154817000	154822200	14_ReprPCWk	KCNN3	chr1	154815600	154824200	13_ReprPC	KCNN3
chr1	154932600	154933000	6_TxWk	PYGO2	chr1	154932400	154933000	7_EnhG1	PYGO2
chr1	154933000	154933600	2_TssFlnk	PYGO2	chr1	154933000	154933400	8_EnhG2	PYGO2
chr1	154949000	154949200	2_TssFlnk	CKS1B	chr1	154949000	154949200	4_TssFlnkD	CKS1B
chr1	154977800	154978600	11_EnhWk	ZBTB7B	chr1	154977400	154978400	9_EnhA1	ZBTB7B
chr1	154989600	154989800	4_TssFlnkD	ZBTB7B	chr1	154989600	154989800	2_TssFlnk	ZBTB7B
chr1	154989800	154990200	2_TssFlnk	ZBTB7B	chr1	154989800	154990200	4_TssFlnkD	ZBTB7B
chr1	155006300	155011000	14_ReprPCWk	DCST1	chr1	155006300	155011200	13_ReprPC	DCST1
chr1	155011800	155012400	11_EnhWk	DCST1	chr1	155011600	155012400	13_ReprPC	DCST1
chr1	155022000	155022600	11_EnhWk	DCST1	chr1	155022200	155022800	9_EnhA1	DCST1
chr1	155024000	155025200	2_TssFlnk	ADAM15	chr1	155024000	155024800	1_TssA	ADAM15
chr1	155107000	155107200	9_EnhA1	EFNA1	chr1	155107000	155107200	11_EnhWk	EFNA1
chr1	155107200	155107333	3_TssFlnkU	EFNA1	chr1	155107200	155107333	4_TssFlnkD	EFNA1
chr1	155109600	155109800	6_TxWk	SLC50A1	chr1	155109600	155109800	7_EnhG1	SLC50A1
chr1	155158300	155162707	6_TxWk	MUC1	chr1	155158300	155162000	14_ReprPCWk	MUC1
chr1	155177200	155178200	3_TssFlnkU	THBS3	chr1	155177000	155178000	4_TssFlnkD	THBS3
chr1	155179600	155179800	4_TssFlnkD	MTX1	chr1	155179600	155179800	2_TssFlnk	MTX1
chr1	155179800	155180000	2_TssFlnk	MTX1	chr1	155179800	155180000	4_TssFlnkD	MTX1
chr1	155211600	155213000	6_TxWk	GBA	chr1	155211200	155213000	11_EnhWk	GBA
chr1	155213000	155213600	2_TssFlnk	GBA	chr1	155213200	155213600	3_TssFlnkU	GBA
chr1	155223400	155224600	2_TssFlnk	FAM189B	chr1	155223400	155224400	4_TssFlnkD	FAM189B
chr1	155225770	155226000	4_TssFlnkD	SCAMP3	chr1	155225770	155226000	8_EnhG2	SCAMP3
chr1	155230800	155231600	2_TssFlnk	SCAMP3	chr1	155230800	155231400	4_TssFlnkD	SCAMP3
chr1	155232659	155232800	6_TxWk	CLK2	chr1	155232659	155232800	8_EnhG2	CLK2
chr1	155241600	155242000	6_TxWk	CLK2	chr1	155241400	155242000	7_EnhG1	CLK2
chr1	155242000	155242600	2_TssFlnk	CLK2	chr1	155242000	155242400	8_EnhG2	CLK2
chr1	155248200	155248282	15_NA	CLK2	chr1	155248200	155248282	14_ReprPCWk	CLK2
chr1	155248200	155259639	15_NA	HCN3	chr1	155249000	155258600	14_ReprPCWk	HCN3
chr1	155423600	155425200	6_TxWk	ASH1L	chr1	155424000	155425200	7_EnhG1	ASH1L
chr1	155425200	155425400	11_EnhWk	ASH1L	chr1	155425200	155425400	9_EnhA1	ASH1L
chr1	155426400	155429200	6_TxWk	ASH1L	chr1	155427200	155429400	5_Tx	ASH1L
chr1	155429200	155432800	5_Tx	ASH1L	chr1	155429400	155431800	6_TxWk	ASH1L
chr1	155435600	155435800	10_EnhA2	ASH1L	chr1	155435600	155435800	4_TssFlnkD	ASH1L
chr1	155436800	155437600	11_EnhWk	ASH1L	chr1	155436600	155437600	9_EnhA1	ASH1L
chr1	155526000	155530000	6_TxWk	ASH1L	chr1	155525800	155528600	5_Tx	ASH1L
chr1	155618000	155618400	1_TssA	MSTO1	chr1	155618000	155618400	4_TssFlnkD	MSTO1
chr1	155716200	155716600	4_TssFlnkD	MSTO1	chr1	155716200	155716600	3_TssFlnkU	MSTO1
chr1	155717000	155718000	5_Tx	MSTO1	chr1	155716600	155718153	7_EnhG1	MSTO1
chr1	155827000	155827600	2_TssFlnk	GON4L	chr1	155827200	155827600	3_TssFlnkU	GON4L
chr1	155827600	155828600	6_TxWk	GON4L	chr1	155827600	155828600	10_EnhA2	GON4L
chr1	155828800	155829191	1_TssA	GON4L	chr1	155828600	155829191	3_TssFlnkU	GON4L
chr1	155829300	155829600	2_TssFlnk	SYT11	chr1	155829300	155829800	3_TssFlnkU	SYT11
chr1	155911480	155912625	6_TxWk	RXFP4	chr1	155911480	155912400	11_EnhWk	RXFP4
chr1	155953600	155954000	9_EnhA1	ARHGEF2	chr1	155953600	155954000	10_EnhA2	ARHGEF2
chr1	155972000	155975800	6_TxWk	ARHGEF2	chr1	155972200	155974600	14_ReprPCWk	ARHGEF2
chr1	155975800	155976861	5_Tx	ARHGEF2	chr1	155975200	155976861	6_TxWk	ARHGEF2
chr1	156024543	156025200	2_TssFlnk	LAMTOR2	chr1	156024543	156025200	1_TssA	LAMTOR2
chr1	156030951	156040295	6_TxWk	RAB25	chr1	156030951	156039000	15_NA	RAB25
chr1	156066200	156066800	11_EnhWk	LMNA	chr1	156066200	156067000	9_EnhA1	LMNA
chr1	156076400	156076800	9_EnhA1	LMNA	chr1	156076200	156076800	2_TssFlnk	LMNA
chr1	156082200	156082600	4_TssFlnkD	LMNA	chr1	156082200	156082800	9_EnhA1	LMNA
chr1	156130400	156131000	11_EnhWk	SEMA4A	chr1	156130600	156131200	2_TssFlnk	SEMA4A
chr1	156182400	156182587	2_TssFlnk	SLC25A44	chr1	156182400	156182587	1_TssA	SLC25A44
chr1	156212600	156213123	6_TxWk	PMF1-BGLAP	chr1	156212800	156213123	14_ReprPCWk	PMF1-BGLAP
chr1	156213206	156214600	6_TxWk	PAQR6	chr1	156213206	156214600	14_ReprPCWk	PAQR6
chr1	156217400	156217881	5_Tx	PAQR6	chr1	156217400	156217881	11_EnhWk	PAQR6
chr1	156251000	156251400	2_TssFlnk	SMG5	chr1	156251000	156251600	4_TssFlnkD	SMG5
chr1	156251600	156251800	3_TssFlnkU	SMG5	chr1	156251600	156251800	2_TssFlnk	SMG5
chr1	156261800	156264600	6_TxWk	GLMP	chr1	156261800	156264200	5_Tx	C1orf85
chr1	156261800	156262976	6_TxWk	TMEM79	chr1	156261800	156262976	5_Tx	TMEM79
chr1	156306200	156307600	2_TssFlnk	CCT3	chr1	156306000	156307200	4_TssFlnkD	CCT3
chr1	156540800	156542000	3_TssFlnkU	IQGAP3	chr1	156540800	156542000	4_TssFlnkD	IQGAP3
chr1	156552400	156553000	2_TssFlnk	TTC24	chr1	156552200	156552800	4_TssFlnkD	TTC24
chr1	156562400	156562600	5_Tx	NAXE	chr1	156562400	156562600	8_EnhG2	APOA1BP
chr1	156628000	156629324	6_TxWk	BCAN	chr1	156628200	156629000	14_ReprPCWk	BCAN
chr1	156638555	156643000	7_EnhG1	NES	chr1	156639200	156642400	5_Tx	NES
chr1	156669398	156673200	14_ReprPCWk	CRABP2	chr1	156670000	156674000	13_ReprPC	CRABP2
chr1	156674800	156675400	12_TssBiv	CRABP2	chr1	156674800	156675608	4_TssFlnkD	CRABP2
chr1	156697200	156697800	2_TssFlnk	ISG20L2	chr1	156697200	156697600	4_TssFlnkD	ISG20L2
chr1	156709600	156709800	7_EnhG1	MRPL24	chr1	156709600	156709800	9_EnhA1	MRPL24
chr1	156783600	156784000	2_TssFlnk	SH2D2A	chr1	156783400	156784000	4_TssFlnkD	SH2D2A
chr1	156863490	156866000	14_ReprPCWk	PEAR1	chr1	156864000	156866800	11_EnhWk	PEAR1
chr1	156868800	156872600	6_TxWk	PEAR1	chr1	156868400	156873400	14_ReprPCWk	PEAR1
chr1	156901600	156902886	6_TxWk	LRRC71	chr1	156901000	156902886	14_ReprPCWk	LRRC71
chr1	157012800	157015000	2_TssFlnk	ARHGEF11	chr1	157013000	157014800	4_TssFlnkD	ARHGEF11
chr1	157106400	157107600	2_TssFlnk	ETV3	chr1	157106400	157107200	4_TssFlnkD	ETV3
chr1	157766200	157789895	14_ReprPCWk	FCRL1	chr1	157764193	157789895	15_NA	FCRL1
chr1	157829600	157834600	14_ReprPCWk	CD5L	chr1	157827600	157835800	15_NA	CD5L
chr1	157965000	157965400	2_TssFlnk	KIRREL1	chr1	157965000	157965600	4_TssFlnkD	KIRREL
chr1	157966400	157966600	11_EnhWk	KIRREL1	chr1	157966400	157966600	8_EnhG2	KIRREL
chr1	157970200	157971800	5_Tx	KIRREL1	chr1	157970600	157971600	11_EnhWk	KIRREL
chr1	157982800	157983000	6_TxWk	KIRREL1	chr1	157982800	157983000	9_EnhA1	KIRREL
chr1	158006400	158007400	7_EnhG1	KIRREL1	chr1	158006600	158007600	9_EnhA1	KIRREL
chr1	158069000	158070052	6_TxWk	KIRREL1	chr1	158069400	158070052	11_EnhWk	KIRREL
chr1	158982800	158984600	6_TxWk	IFI16	chr1	158982800	158984000	7_EnhG1	IFI16
chr1	159092200	159095400	13_ReprPC	AIM2	chr1	159090600	159094600	14_ReprPCWk	AIM2
chr1	159682079	159684379	14_ReprPCWk	CRP	chr1	159682079	159684379	15_NA	CRP
chr1	159770301	159776800	15_NA	FCRL6	chr1	159770301	159779400	14_ReprPCWk	FCRL6
chr1	159823000	159823600	10_EnhA2	SNHG28	chr1	159823000	159823400	11_EnhWk	C1orf204
chr1	159823600	159825137	1_TssA	SNHG28	chr1	159823600	159825000	3_TssFlnkU	C1orf204
chr1	159827690	159838600	15_NA	RP11-190A12.7	chr1	159829600	159837000	14_ReprPCWk	RP11-190A12.7
chr1	159838800	159842843	6_TxWk	RP11-190A12.7	chr1	159839600	159842843	15_NA	RP11-190A12.7
chr1	159842154	159847800	6_TxWk	CFAP45	chr1	159842154	159848800	15_NA	CCDC19
chr1	159848000	159851200	6_TxWk	CFAP45	chr1	159848800	159852600	11_EnhWk	CCDC19
chr1	159854600	159859400	6_TxWk	CFAP45	chr1	159852600	159859200	15_NA	CCDC19
chr1	159859400	159861400	11_EnhWk	CFAP45	chr1	159859400	159860600	9_EnhA1	CCDC19
chr1	159891800	159893200	3_TssFlnkU	TAGLN2	chr1	159891800	159893200	4_TssFlnkD	TAGLN2
chr1	160055800	160060353	6_TxWk	KCNJ9	chr1	160054600	160059200	14_ReprPCWk	KCNJ9
chr1	160086800	160088400	11_EnhWk	ATP1A2	chr1	160086200	160088200	12_TssBiv	ATP1A2
chr1	160088400	160091400	6_TxWk	ATP1A2	chr1	160089000	160091000	14_ReprPCWk	ATP1A2
chr1	160091800	160093400	6_TxWk	ATP1A2	chr1	160091600	160093400	14_ReprPCWk	ATP1A2
chr1	160093400	160093600	10_EnhA2	ATP1A2	chr1	160093400	160093600	11_EnhWk	ATP1A2
chr1	160096600	160097200	6_TxWk	ATP1A2	chr1	160096600	160097400	11_EnhWk	ATP1A2
chr1	160110000	160113381	14_ReprPCWk	ATP1A2	chr1	160107800	160113381	13_ReprPC	ATP1A2
chr1	160121360	160125800	15_NA	ATP1A4	chr1	160121360	160126200	14_ReprPCWk	ATP1A4
chr1	160160285	160162400	14_ReprPCWk	CASQ1	chr1	160160285	160162400	13_ReprPC	CASQ1
chr1	160162400	160163600	11_EnhWk	CASQ1	chr1	160162400	160164400	14_ReprPCWk	CASQ1
chr1	160313800	160314200	2_TssFlnk	NCSTN	chr1	160313800	160314400	4_TssFlnkD	NCSTN
chr1	160654200	160681641	14_ReprPCWk	CD48	chr1	160651800	160681641	15_NA	CD48
chr1	160709037	160721000	14_ReprPCWk	SLAMF7	chr1	160709037	160724611	15_NA	SLAMF7
chr1	160990400	160991138	2_TssFlnk	F11R	chr1	160990600	160991138	12_TssBiv	F11R
chr1	160990400	160991400	2_TssFlnk	F11R	chr1	160990600	160991800	12_TssBiv	F11R
chr1	161052800	161053200	9_EnhA1	NECTIN4	chr1	161052800	161053400	11_EnhWk	PVRL4
chr1	161086600	161087000	8_EnhG2	PFDN2	chr1	161086600	161087200	4_TssFlnkD	PFDN2
chr1	161100800	161101800	2_TssFlnk	DEDD	chr1	161100800	161101400	4_TssFlnkD	DEDD
chr1	161124400	161124800	2_TssFlnk	UFC1	chr1	161124400	161124800	4_TssFlnkD	UFC1
chr1	161135400	161135513	3_TssFlnkU	USP21	chr1	161135400	161135513	1_TssA	USP21
chr1	161137200	161137800	6_TxWk	PPOX	chr1	161137200	161137800	11_EnhWk	PPOX
chr1	161147600	161147800	2_TssFlnk	PPOX	chr1	161147600	161147803	11_EnhWk	PPOX
chr1	161156000	161156400	11_EnhWk	ADAMTS4	chr1	161156000	161156400	9_EnhA1	ADAMTS4
chr1	161165800	161166200	11_EnhWk	ADAMTS4	chr1	161165800	161166400	8_EnhG2	ADAMTS4
chr1	161185024	161185600	5_Tx	FCER1G	chr1	161185024	161185400	7_EnhG1	FCER1G
chr1	161185600	161186200	6_TxWk	FCER1G	chr1	161185800	161186200	10_EnhA2	FCER1G
chr1	161186400	161187000	3_TssFlnkU	FCER1G	chr1	161186200	161187000	9_EnhA1	FCER1G
chr1	161187000	161187600	11_EnhWk	FCER1G	chr1	161187200	161187800	9_EnhA1	FCER1G
chr1	161200800	161208092	6_TxWk	NR1I3	chr1	161201800	161208092	14_ReprPCWk	NR1I3
chr1	161276400	161277000	6_TxWk	MPZ	chr1	161276400	161276800	11_EnhWk	MPZ
chr1	161319000	161320800	6_TxWk	SDHC	chr1	161318800	161320800	5_Tx	SDHC
chr1	161320800	161322800	5_Tx	SDHC	chr1	161320800	161322600	6_TxWk	SDHC
chr1	161518000	161522200	14_ReprPCWk	FCGR3A	chr1	161516200	161521200	13_ReprPC	FCGR3A
chr1	161677200	161677400	11_EnhWk	FCRLA	chr1	161677200	161677400	10_EnhA2	FCRLA
chr1	161691353	161691400	10_EnhA2	FCRLB	chr1	161691353	161691400	15_NA	FCRLB
chr1	161692200	161695600	14_ReprPCWk	FCRLB	chr1	161692600	161695600	6_TxWk	FCRLB
chr1	161695600	161696200	2_TssFlnk	FCRLB	chr1	161695800	161696400	3_TssFlnkU	FCRLB
chr1	161720200	161721000	2_TssFlnk	DUSP12	chr1	161720200	161720800	4_TssFlnkD	DUSP12
chr1	161759600	161762000	5_Tx	ATF6	chr1	161758800	161762000	6_TxWk	ATF6
chr1	161854000	161855200	11_EnhWk	ATF6	chr1	161853600	161854800	9_EnhA1	ATF6
chr1	161892800	161899200	15_NA	ATF6	chr1	161892200	161898400	6_TxWk	ATF6
chr1	161900000	161900600	10_EnhA2	ATF6	chr1	161900000	161900800	11_EnhWk	ATF6
chr1	161931000	161931600	10_EnhA2	ATF6	chr1	161931200	161931800	9_EnhA1	ATF6
chr1	161931600	161932800	1_TssA	ATF6	chr1	161931800	161933000	3_TssFlnkU	ATF6
chr1	161933600	161933860	6_TxWk	ATF6	chr1	161933600	161933800	10_EnhA2	ATF6
chr1	161964400	161964600	1_TssA	OLFML2B	chr1	161964400	161964600	4_TssFlnkD	OLFML2B
chr1	161964600	161965000	10_EnhA2	OLFML2B	chr1	161964600	161965200	11_EnhWk	OLFML2B
chr1	161975000	161976000	14_ReprPCWk	OLFML2B	chr1	161975200	161976400	5_Tx	OLFML2B
chr1	161976400	161978800	13_ReprPC	OLFML2B	chr1	161977000	161978800	14_ReprPCWk	OLFML2B
chr1	161982200	161982800	11_EnhWk	OLFML2B	chr1	161982400	161982800	6_TxWk	OLFML2B
chr1	162342993	162343400	11_EnhWk	SPATA46	chr1	162342993	162343400	14_ReprPCWk	C1orf111
chr1	162532800	162533400	2_TssFlnk	UAP1	chr1	162532800	162533400	8_EnhG2	UAP1
chr1	162533800	162534800	2_TssFlnk	UAP1	chr1	162534200	162535200	8_EnhG2	UAP1
chr1	162628200	162633800	6_TxWk	DDR2	chr1	162628600	162633000	7_EnhG1	DDR2
chr1	162642200	162642800	6_TxWk	DDR2	chr1	162642000	162642600	11_EnhWk	DDR2
chr1	162642800	162643200	11_EnhWk	DDR2	chr1	162642600	162643200	9_EnhA1	DDR2
chr1	162644600	162647800	6_TxWk	DDR2	chr1	162644200	162646600	11_EnhWk	DDR2
chr1	162666400	162666800	4_TssFlnkD	DDR2	chr1	162666400	162666800	3_TssFlnkU	DDR2
chr1	162761000	162761400	4_TssFlnkD	HSD17B7	chr1	162760800	162761400	2_TssFlnk	HSD17B7
chr1	162800600	162819600	15_NA	CCDC190	chr1	162799800	162816800	14_ReprPCWk	C1orf110
chr1	162828200	162838605	15_NA	CCDC190	chr1	162831800	162838605	6_TxWk	C1orf110
chr1	163136200	163138400	11_EnhWk	RGS5	chr1	163136200	163138000	9_EnhA1	RGS5
chr1	163143000	163144200	11_EnhWk	RGS5	chr1	163143400	163144400	10_EnhA2	RGS5
chr1	164558400	164573600	15_NA	PBX1	chr1	164558600	164571400	6_TxWk	PBX1
chr1	164686400	164687000	11_EnhWk	PBX1	chr1	164686600	164687000	9_EnhA1	PBX1
chr1	164742800	164750000	15_NA	PBX1	chr1	164744000	164749400	6_TxWk	PBX1
chr1	164751000	164756800	14_ReprPCWk	PBX1	chr1	164751400	164755400	6_TxWk	PBX1
chr1	164764200	164770400	14_ReprPCWk	PBX1	chr1	164764400	164772800	6_TxWk	PBX1
chr1	165265800	165293600	15_NA	LMX1A	chr1	165257600	165297400	14_ReprPCWk	LMX1A
chr1	165394600	165404800	14_ReprPCWk	RXRG	chr1	165395000	165401400	15_NA	RXRG
chr1	165739200	165739600	2_TssFlnk	TMCO1	chr1	165739000	165739600	4_TssFlnkD	TMCO1
chr1	165798800	165799400	3_TssFlnkU	UCK2	chr1	165798600	165799400	4_TssFlnkD	UCK2
chr1	165812400	165813600	11_EnhWk	UCK2	chr1	165812800	165813600	7_EnhG1	UCK2
chr1	165840800	165848800	6_TxWk	UCK2	chr1	165841800	165848600	5_Tx	UCK2
chr1	165849000	165849600	3_TssFlnkU	UCK2	chr1	165849000	165849600	1_TssA	UCK2
chr1	165849600	165849800	9_EnhA1	UCK2	chr1	165849600	165849800	2_TssFlnk	UCK2
chr1	166894800	166895600	3_TssFlnkU	ILDR2	chr1	166894400	166895600	11_EnhWk	ILDR2
chr1	166897400	166901400	14_ReprPCWk	ILDR2	chr1	166898000	166901600	13_ReprPC	ILDR2
chr1	167024200	167027200	15_NA	GPA33	chr1	167024800	167028600	14_ReprPCWk	GPA33
chr1	167063800	167064600	4_TssFlnkD	DUSP27	chr1	167063800	167064600	3_TssFlnkU	DUSP27
chr1	167064600	167083600	6_TxWk	DUSP27	chr1	167064800	167087600	14_ReprPCWk	DUSP27
chr1	167313000	167336000	6_TxWk	POU2F1	chr1	167314200	167334800	15_NA	POU2F1
chr1	167399877	167403000	15_NA	CD247	chr1	167399877	167402400	14_ReprPCWk	CD247
chr1	167403000	167404800	14_ReprPCWk	CD247	chr1	167402400	167404200	13_ReprPC	CD247
chr1	167423800	167424200	12_TssBiv	CD247	chr1	167423800	167424200	4_TssFlnkD	CD247
chr1	167521800	167522800	2_TssFlnk	CREG1	chr1	167522000	167522600	4_TssFlnkD	CREG1
chr1	167634200	167635000	11_EnhWk	RCSD1	chr1	167634200	167634800	10_EnhA2	RCSD1
chr1	167790400	167792000	9_EnhA1	ADCY10	chr1	167790200	167792000	11_EnhWk	ADCY10
chr1	167907000	167908000	2_TssFlnk	DCAF6	chr1	167907400	167908200	4_TssFlnkD	DCAF6
chr1	168019400	168024200	5_Tx	DCAF6	chr1	168020400	168024800	6_TxWk	DCAF6
chr1	168106600	168106800	1_TssA	GPR161	chr1	168106600	168106821	2_TssFlnk	GPR161
chr1	168149400	168150000	2_TssFlnk	TIPRL	chr1	168149200	168150000	4_TssFlnkD	TIPRL
chr1	168271600	168283664	6_TxWk	TBX19	chr1	168271400	168283664	15_NA	TBX19
chr1	168510003	168513235	14_ReprPCWk	XCL2	chr1	168510600	168512800	13_ReprPC	XCL2
chr1	168677800	168678800	9_EnhA1	DPT	chr1	168677600	168678800	11_EnhWk	DPT
chr1	168678800	168679200	3_TssFlnkU	DPT	chr1	168678800	168679400	4_TssFlnkD	DPT
chr1	168679200	168679800	9_EnhA1	DPT	chr1	168679400	168679800	11_EnhWk	DPT
chr1	169079800	169080600	10_EnhA2	ATP1B1	chr1	169079600	169080600	11_EnhWk	ATP1B1
chr1	169080600	169080800	3_TssFlnkU	ATP1B1	chr1	169080600	169080800	9_EnhA1	ATP1B1
chr1	169281200	169281600	11_EnhWk	NME7	chr1	169281200	169281600	9_EnhA1	NME7
chr1	169281600	169282000	4_TssFlnkD	NME7	chr1	169281600	169282200	11_EnhWk	NME7
chr1	169282400	169331600	15_NA	NME7	chr1	169296600	169332000	6_TxWk	NME7
chr1	169336400	169337205	1_TssA	NME7	chr1	169336600	169337200	2_TssFlnk	NME7
chr1	169338200	169338800	2_TssFlnk	BLZF1	chr1	169338200	169338600	4_TssFlnkD	BLZF1
chr1	169453000	169453600	3_TssFlnkU	SLC19A2	chr1	169453000	169453400	2_TssFlnk	SLC19A2
chr1	169547000	169549200	13_ReprPC	F5	chr1	169546400	169548400	14_ReprPCWk	F5
chr1	169632400	169646200	15_NA	C1orf112	chr1	169631245	169650000	14_ReprPCWk	C1orf112
chr1	169648400	169652400	14_ReprPCWk	C1orf112	chr1	169650000	169652400	13_ReprPC	C1orf112
chr1	169778200	169781800	5_Tx	C1orf112	chr1	169777600	169781200	6_TxWk	C1orf112
chr1	169861600	169862200	2_TssFlnk	SCYL3	chr1	169861400	169862000	4_TssFlnkD	SCYL3
chr1	169890467	169900800	6_TxWk	KIFAP3	chr1	169890467	169900800	15_NA	KIFAP3
chr1	169900800	169901200	15_NA	KIFAP3	chr1	169900800	169901400	11_EnhWk	KIFAP3
chr1	169968000	169969000	10_EnhA2	KIFAP3	chr1	169967800	169968800	11_EnhWk	KIFAP3
chr1	170132600	170136931	15_NA	METTL11B	chr1	170132600	170136931	6_TxWk	METTL11B
chr1	170502200	170503000	2_TssFlnk	GORAB	chr1	170502200	170502800	4_TssFlnkD	GORAB
chr1	170505400	170506800	6_TxWk	GORAB	chr1	170505600	170507000	7_EnhG1	GORAB
chr1	170631869	170634400	2_TssFlnk	PRRX1	chr1	170631869	170633800	1_TssA	PRRX1
chr1	170662600	170663200	11_EnhWk	PRRX1	chr1	170662800	170663400	4_TssFlnkD	PRRX1
chr1	170705600	170708560	15_NA	PRRX1	chr1	170706400	170708560	6_TxWk	PRRX1
chr1	171079200	171079800	13_ReprPC	FMO3	chr1	171079200	171079800	14_ReprPCWk	FMO3
chr1	171126600	171130707	14_ReprPCWk	FMO6P	chr1	171124000	171130707	15_NA	FMO6P
chr1	171283347	171283800	2_TssFlnk	FMO4	chr1	171283400	171283800	4_TssFlnkD	FMO4
chr1	171455600	171456200	2_TssFlnk	PRRC2C	chr1	171455600	171456600	4_TssFlnkD	PRRC2C
chr1	171615200	171621823	14_ReprPCWk	MYOC	chr1	171615800	171621400	6_TxWk	MYOC
chr1	171709000	171709800	2_TssFlnk	VAMP4	chr1	171709000	171710200	4_TssFlnkD	VAMP4
chr1	171751400	171752000	2_TssFlnk	EEF1AKNMT	chr1	171751600	171752000	4_TssFlnkD	METTL13
chr1	171777400	171783163	14_ReprPCWk	EEF1AKNMT	chr1	171775400	171783163	15_NA	METTL13
chr1	171810800	171811800	12_TssBiv	DNM3	chr1	171811200	171811800	4_TssFlnkD	DNM3
chr1	172105200	172105400	2_TssFlnk	DNM3	chr1	172105200	172105400	9_EnhA1	DNM3
chr1	172105600	172106200	10_EnhA2	DNM3	chr1	172105400	172106400	3_TssFlnkU	DNM3
chr1	172106400	172107600	6_TxWk	DNM3	chr1	172106800	172107600	10_EnhA2	DNM3
chr1	172115000	172123400	15_NA	DNM3	chr1	172116400	172122600	6_TxWk	DNM3
chr1	172123400	172124000	10_EnhA2	DNM3	chr1	172123200	172123800	9_EnhA1	DNM3
chr1	172124600	172141400	15_NA	DNM3	chr1	172125200	172137200	6_TxWk	DNM3
chr1	172150800	172151400	10_EnhA2	DNM3	chr1	172150800	172151800	11_EnhWk	DNM3
chr1	172256800	172290000	15_NA	DNM3	chr1	172267800	172289600	6_TxWk	DNM3
chr1	172311800	172312600	10_EnhA2	DNM3	chr1	172312000	172312600	9_EnhA1	DNM3
chr1	172327200	172328400	3_TssFlnkU	DNM3	chr1	172327000	172328000	9_EnhA1	DNM3
chr1	172330200	172342800	15_NA	DNM3	chr1	172330000	172343000	6_TxWk	DNM3
chr1	172339329	172342800	15_NA	PIGC	chr1	172339329	172343000	6_TxWk	PIGC
chr1	172413600	172419800	15_NA	C1orf105	chr1	172413800	172419000	6_TxWk	C1orf105
chr1	172437200	172437971	11_EnhWk	C1orf105	chr1	172437200	172437971	10_EnhA2	C1orf105
chr1	172503800	172504400	2_TssFlnk	SUCO	chr1	172503600	172504200	4_TssFlnkD	SUCO
chr1	173012000	173013000	9_EnhA1	TNFSF18	chr1	173012000	173013200	11_EnhWk	TNFSF18
chr1	173164000	173166200	7_EnhG1	TNFSF4	chr1	173163800	173165600	11_EnhWk	TNFSF4
chr1	173166200	173169400	5_Tx	TNFSF4	chr1	173165600	173169800	6_TxWk	TNFSF4
chr1	173169600	173170600	8_EnhG2	TNFSF4	chr1	173169800	173170600	10_EnhA2	TNFSF4
chr1	173176200	173176452	3_TssFlnkU	TNFSF4	chr1	173176200	173176452	4_TssFlnkD	TNFSF4
chr1	173469603	173475800	15_NA	SLC9C2	chr1	173469603	173476000	6_TxWk	SLC9C2
chr1	173476000	173477000	9_EnhA1	SLC9C2	chr1	173476000	173477000	11_EnhWk	SLC9C2
chr1	173638600	173639001	2_TssFlnk	ANKRD45	chr1	173638600	173639001	12_TssBiv	ANKRD45
chr1	173792000	173792200	2_TssFlnk	CENPL	chr1	173792000	173792200	8_EnhG2	CENPL
chr1	173794600	173795000	2_TssFlnk	DARS2	chr1	173794600	173795000	4_TssFlnkD	DARS2
chr1	173837220	173837800	1_TssA	ZBTB37	chr1	173837220	173837600	2_TssFlnk	ZBTB37
chr1	173989600	173990200	2_TssFlnk	RC3H1	chr1	173989400	173990000	8_EnhG2	RC3H1
chr1	174130000	174175800	15_NA	RABGAP1L	chr1	174130000	174198800	6_TxWk	RABGAP1L
chr1	174768400	174769800	1_TssA	RABGAP1L	chr1	174768400	174769800	2_TssFlnk	RABGAP1L
chr1	174808000	174808600	10_EnhA2	RABGAP1L	chr1	174807800	174808400	11_EnhWk	RABGAP1L
chr1	174935600	174937000	14_ReprPCWk	RABGAP1L	chr1	174935200	174937400	6_TxWk	RABGAP1L
chr1	174937400	174938600	9_EnhA1	RABGAP1L	chr1	174937400	174938200	11_EnhWk	RABGAP1L
chr1	174939600	174945200	14_ReprPCWk	RABGAP1L	chr1	174938200	174943600	6_TxWk	RABGAP1L
chr1	174950800	174959200	15_NA	RABGAP1L	chr1	174946400	174958600	6_TxWk	RABGAP1L
chr1	174970600	174971600	6_TxWk	CACYBP	chr1	174970600	174971800	11_EnhWk	CACYBP
chr1	175036994	175041400	14_ReprPCWk	TNN	chr1	175038400	175041400	13_ReprPC	TNN
chr1	176154000	176173000	15_NA	COP1	chr1	176154000	176173600	6_TxWk	RFWD2
chr1	176518400	176527600	14_ReprPCWk	PAPPA2	chr1	176518600	176528000	13_ReprPC	PAPPA2
chr1	176527600	176529000	13_ReprPC	PAPPA2	chr1	176528000	176529200	14_ReprPCWk	PAPPA2
chr1	176626200	176626600	10_EnhA2	PAPPA2	chr1	176626000	176626600	11_EnhWk	PAPPA2
chr1	176866600	176867200	2_TssFlnk	ASTN1	chr1	176866600	176867200	4_TssFlnkD	ASTN1
chr1	176892400	176920400	14_ReprPCWk	ASTN1	chr1	176898600	176918200	15_NA	ASTN1
chr1	177039600	177052400	14_ReprPCWk	ASTN1	chr1	177041400	177052400	15_NA	ASTN1
chr1	177893091	177894400	11_EnhWk	SEC16B	chr1	177893200	177894200	6_TxWk	SEC16B
chr1	178097000	178097200	10_EnhA2	RASAL2	chr1	178097000	178097200	4_TssFlnkD	RASAL2
chr1	178106400	178106600	10_EnhA2	RASAL2	chr1	178106400	178106600	4_TssFlnkD	RASAL2
chr1	178161800	178162400	9_EnhA1	RASAL2	chr1	178161800	178162400	4_TssFlnkD	RASAL2
chr1	178192600	178201800	15_NA	RASAL2	chr1	178189400	178201200	6_TxWk	RASAL2
chr1	178280600	178298200	15_NA	RASAL2	chr1	178280800	178291400	6_TxWk	RASAL2
chr1	178310600	178311000	3_TssFlnkU	RASAL2	chr1	178310600	178311000	4_TssFlnkD	RASAL2
chr1	178311400	178313200	6_TxWk	RASAL2	chr1	178311000	178313400	11_EnhWk	RASAL2
chr1	178340600	178341400	2_TssFlnk	RASAL2	chr1	178340800	178341400	4_TssFlnkD	RASAL2
chr1	178482212	178498600	15_NA	TEX35	chr1	178486000	178496000	14_ReprPCWk	TEX35
chr1	178511400	178511600	4_TssFlnkD	TEX35	chr1	178511400	178511600	3_TssFlnkU	TEX35
chr1	178696800	178697000	11_EnhWk	RALGPS2	chr1	178696800	178697000	2_TssFlnk	RALGPS2
chr1	179000800	179001000	10_EnhA2	FAM20B	chr1	179000800	179001000	11_EnhWk	FAM20B
chr1	179006200	179008600	11_EnhWk	FAM20B	chr1	179006800	179008800	9_EnhA1	FAM20B
chr1	179026800	179027400	10_EnhA2	FAM20B	chr1	179026800	179027400	9_EnhA1	FAM20B
chr1	179163200	179175800	15_NA	ABL2	chr1	179162800	179175600	6_TxWk	ABL2
chr1	179176200	179185000	15_NA	ABL2	chr1	179177200	179186000	6_TxWk	ABL2
chr1	179187000	179187600	11_EnhWk	ABL2	chr1	179187200	179187800	9_EnhA1	ABL2
chr1	179278600	179279400	6_TxWk	SOAT1	chr1	179278600	179279400	9_EnhA1	SOAT1
chr1	179494000	179515200	15_NA	AXDND1	chr1	179498800	179519800	14_ReprPCWk	AXDND1
chr1	179520400	179523870	15_NA	AXDND1	chr1	179521400	179523870	14_ReprPCWk	AXDND1
chr1	179649400	179660407	14_ReprPCWk	TDRD5	chr1	179646600	179660407	15_NA	TDRD5
chr1	179783600	179783800	12_TssBiv	FAM163A	chr1	179783600	179783800	11_EnhWk	FAM163A
chr1	179783800	179784800	2_TssFlnk	FAM163A	chr1	179783800	179784800	4_TssFlnkD	FAM163A
chr1	179784800	179785333	6_TxWk	FAM163A	chr1	179784800	179785333	11_EnhWk	FAM163A
chr1	179845400	179846600	2_TssFlnk	TOR1AIP2	chr1	179845400	179846200	4_TssFlnkD	TOR1AIP2
chr1	179958600	179962600	5_Tx	CEP350	chr1	179960200	179963400	6_TxWk	CEP350
chr1	180124800	180125400	2_TssFlnk	QSOX1	chr1	180124800	180125400	4_TssFlnkD	QSOX1
chr1	180271000	180278600	15_NA	ACBD6	chr1	180269000	180278400	6_TxWk	ACBD6
chr1	180330200	180335800	15_NA	ACBD6	chr1	180330400	180335400	6_TxWk	ACBD6
chr1	180336200	180358400	15_NA	ACBD6	chr1	180336200	180355000	6_TxWk	ACBD6
chr1	180470400	180471000	2_TssFlnk	ACBD6	chr1	180470400	180470800	4_TssFlnkD	ACBD6
chr1	180883000	180883600	2_TssFlnk	KIAA1614	chr1	180883000	180883400	4_TssFlnkD	KIAA1614
chr1	181003800	181004000	2_TssFlnk	MR1	chr1	181003800	181004000	4_TssFlnkD	MR1
chr1	182567758	182572400	6_TxWk	RGS16	chr1	182567758	182571600	14_ReprPCWk	RGS16
chr1	182765600	182791600	6_TxWk	NPL	chr1	182762600	182799519	15_NA	NPL
chr1	182900600	182911800	13_ReprPC	SHCBP1L	chr1	182898800	182913000	14_ReprPCWk	SHCBP1L
chr1	183008400	183009200	3_TssFlnkU	LAMC1	chr1	183008400	183009000	9_EnhA1	LAMC1
chr1	183041200	183041800	9_EnhA1	LAMC1	chr1	183041000	183041600	11_EnhWk	LAMC1
chr1	183046400	183047800	6_TxWk	LAMC1	chr1	183045800	183047800	11_EnhWk	LAMC1
chr1	183060200	183065600	6_TxWk	LAMC1	chr1	183057000	183065800	11_EnhWk	LAMC1
chr1	183164000	183164800	9_EnhA1	LAMC2	chr1	183163800	183165000	11_EnhWk	LAMC2
chr1	183165000	183174200	15_NA	LAMC2	chr1	183165000	183173800	6_TxWk	LAMC2
chr1	183181800	183187400	6_TxWk	LAMC2	chr1	183180000	183187200	15_NA	LAMC2
chr1	183205000	183206600	6_TxWk	LAMC2	chr1	183205200	183206200	11_EnhWk	LAMC2
chr1	183211600	183213600	6_TxWk	LAMC2	chr1	183212000	183214035	9_EnhA1	LAMC2
chr1	183237800	183239600	6_TxWk	NMNAT2	chr1	183237400	183239400	10_EnhA2	NMNAT2
chr1	183289800	183292400	13_ReprPC	NMNAT2	chr1	183288200	183292200	14_ReprPCWk	NMNAT2
chr1	183345600	183350800	13_ReprPC	NMNAT2	chr1	183346800	183351000	14_ReprPCWk	NMNAT2
chr1	183350800	183353000	14_ReprPCWk	NMNAT2	chr1	183351000	183352800	13_ReprPC	NMNAT2
chr1	183450200	183474600	15_NA	SMG7	chr1	183450800	183475000	6_TxWk	SMG7
chr1	183598200	183599200	5_Tx	ARPC5	chr1	183598000	183598800	7_EnhG1	ARPC5
chr1	183601000	183602600	8_EnhG2	ARPC5	chr1	183601600	183603000	3_TssFlnkU	ARPC5
chr1	183606000	183606200	14_ReprPCWk	RGL1	chr1	183606000	183606200	2_TssFlnk	RGL1
chr1	183765400	183774000	15_NA	RGL1	chr1	183768400	183773800	6_TxWk	RGL1
chr1	183777400	183782000	6_TxWk	RGL1	chr1	183775800	183783000	11_EnhWk	RGL1
chr1	183840000	183840600	11_EnhWk	RGL1	chr1	183839800	183840400	9_EnhA1	RGL1
chr1	183996600	183999800	15_NA	COLGALT2	chr1	183995000	183999200	14_ReprPCWk	COLGALT2
chr1	184000000	184002200	6_TxWk	COLGALT2	chr1	183999200	184002800	15_NA	COLGALT2
chr1	184003400	184005200	6_TxWk	COLGALT2	chr1	184003200	184005400	14_ReprPCWk	COLGALT2
chr1	184025000	184025600	6_TxWk	TSEN15	chr1	184025000	184025600	7_EnhG1	TSEN15
chr1	184027200	184028600	6_TxWk	TSEN15	chr1	184027400	184028400	7_EnhG1	TSEN15
chr1	184041600	184043346	6_TxWk	TSEN15	chr1	184041000	184042800	5_Tx	TSEN15
chr1	184358000	184358400	2_TssFlnk	C1orf21	chr1	184357800	184358400	4_TssFlnkD	C1orf21
chr1	184378600	184388600	15_NA	C1orf21	chr1	184378800	184385800	6_TxWk	C1orf21
chr1	184454400	184459200	6_TxWk	C1orf21	chr1	184454000	184458000	11_EnhWk	C1orf21
chr1	184493800	184504000	6_TxWk	C1orf21	chr1	184494000	184501000	15_NA	C1orf21
chr1	184504000	184504200	2_TssFlnk	C1orf21	chr1	184504000	184504200	9_EnhA1	C1orf21
chr1	184504200	184504400	4_TssFlnkD	C1orf21	chr1	184504200	184504400	3_TssFlnkU	C1orf21
chr1	184504400	184505000	1_TssA	C1orf21	chr1	184504600	184505000	3_TssFlnkU	C1orf21
chr1	184532400	184543600	6_TxWk	C1orf21	chr1	184532200	184543600	15_NA	C1orf21
chr1	184544400	184564600	15_NA	C1orf21	chr1	184547200	184562400	6_TxWk	C1orf21
chr1	184759858	184760200	15_NA	FAM129A	chr1	184759858	184760400	11_EnhWk	FAM129A
chr1	184812600	184828400	14_ReprPCWk	FAM129A	chr1	184814200	184829800	15_NA	FAM129A
chr1	184830800	184834200	13_ReprPC	FAM129A	chr1	184831400	184835800	14_ReprPCWk	FAM129A
chr1	184835200	184837800	14_ReprPCWk	FAM129A	chr1	184835800	184837600	11_EnhWk	FAM129A
chr1	185069400	185071740	6_TxWk	RNF2	chr1	185068600	185071740	5_Tx	RNF2
chr1	185126212	185127200	1_TssA	SWT1	chr1	185126600	185127400	2_TssFlnk	SWT1
chr1	185247600	185249000	6_TxWk	SWT1	chr1	185248000	185249600	11_EnhWk	SWT1
chr1	185703800	185704000	12_TssBiv	HMCN1	chr1	185703800	185704000	4_TssFlnkD	HMCN1
chr1	185746200	185770600	15_NA	HMCN1	chr1	185753000	185778400	14_ReprPCWk	HMCN1
chr1	185806600	185819000	15_NA	HMCN1	chr1	185809200	185825200	14_ReprPCWk	HMCN1
chr1	185821400	185853000	14_ReprPCWk	HMCN1	chr1	185825200	185847600	15_NA	HMCN1
chr1	185966200	185970400	13_ReprPC	HMCN1	chr1	185964800	185971000	14_ReprPCWk	HMCN1
chr1	186018200	186034200	14_ReprPCWk	HMCN1	chr1	186013800	186034000	15_NA	HMCN1
chr1	186046400	186062200	14_ReprPCWk	HMCN1	chr1	186051600	186066200	15_NA	HMCN1
chr1	186062800	186099400	14_ReprPCWk	HMCN1	chr1	186072400	186113400	15_NA	HMCN1
chr1	186148600	186152800	15_NA	HMCN1	chr1	186148800	186151800	6_TxWk	HMCN1
chr1	186158800	186160085	15_NA	HMCN1	chr1	186158600	186160085	6_TxWk	HMCN1
chr1	186266600	186274000	14_ReprPCWk	PRG4	chr1	186265405	186274800	15_NA	PRG4
chr1	186345600	186346200	2_TssFlnk	ODR4	chr1	186345600	186346400	4_TssFlnkD	C1orf27
chr1	186649200	186649559	12_TssBiv	PTGS2	chr1	186649000	186649559	2_TssFlnk	PTGS2
chr1	190139200	190140400	10_EnhA2	BRINP3	chr1	190139600	190140400	11_EnhWk	BRINP3
chr1	190141800	190142600	10_EnhA2	BRINP3	chr1	190142000	190143000	11_EnhWk	BRINP3
chr1	193030400	193030800	2_TssFlnk	TROVE2	chr1	193030400	193030800	4_TssFlnkD	TROVE2
chr1	193075200	193075244	10_EnhA2	GLRX2	chr1	193075200	193075244	2_TssFlnk	GLRX2
[truncated: 24,006 more rows]

## Sheet: Chrom state switches MT
Chromatin state switches in MT
CN					FSHD1
Chr	Start	End	Chrom state	Gene Symbol	Chr	Start	End	chrom state	Gene Symbol
chr1	134901	139379	6_TxWk	AL627309.1	chr1	134901	139379	14_ReprPCWk	AL627309.1
chr1	870400	871600	13_ReprPC	SAMD11	chr1	870800	871600	12_TssBiv	SAMD11
chr1	877000	877800	2_TssFlnk	SAMD11	chr1	877000	877800	4_TssFlnkD	SAMD11
chr1	893600	894000	2_TssFlnk	NOC2L	chr1	893600	894200	4_TssFlnkD	NOC2L
chr1	901877	902600	2_TssFlnk	PLEKHN1	chr1	901877	902600	4_TssFlnkD	PLEKHN1
chr1	948803	949400	1_TssA	ISG15	chr1	949000	949600	4_TssFlnkD	ISG15
chr1	949400	949920	15_NA	ISG15	chr1	949600	949920	11_EnhWk	ISG15
chr1	955503	956600	2_TssFlnk	AGRN	chr1	955600	957000	12_TssBiv	AGRN
chr1	963400	966200	6_TxWk	AGRN	chr1	963600	967200	14_ReprPCWk	AGRN
chr1	1006346	1009687	13_ReprPC	RNF223	chr1	1006600	1009200	14_ReprPCWk	RNF223
chr1	1138888	1142000	14_ReprPCWk	TNFRSF18	chr1	1138888	1141600	13_ReprPC	TNFRSF18
chr1	1167629	1168600	2_TssFlnk	B3GALT6	chr1	1167800	1168800	4_TssFlnkD	B3GALT6
chr1	1199400	1201200	9_EnhA1	UBE2J2	chr1	1199400	1201800	7_EnhG1	UBE2J2
chr1	1204200	1206000	6_TxWk	UBE2J2	chr1	1204000	1206400	7_EnhG1	UBE2J2
chr1	1206800	1207600	7_EnhG1	UBE2J2	chr1	1206800	1207600	11_EnhWk	UBE2J2
chr1	1240800	1242600	2_TssFlnk	ACAP3	chr1	1241400	1243000	4_TssFlnkD	ACAP3
chr1	1245200	1245600	6_TxWk	PUSL1	chr1	1245000	1245600	7_EnhG1	PUSL1
chr1	1260136	1261000	2_TssFlnk	CPTP	chr1	1260200	1261200	4_TssFlnkD	CPTP
chr1	1261000	1262200	6_TxWk	CPTP	chr1	1261200	1262400	11_EnhWk	CPTP
chr1	1280800	1281600	11_EnhWk	DVL1	chr1	1280800	1282000	9_EnhA1	DVL1
chr1	1281800	1282600	6_TxWk	DVL1	chr1	1282000	1282600	11_EnhWk	DVL1
chr1	1288069	1290600	5_Tx	MXRA8	chr1	1288069	1290400	7_EnhG1	MXRA8
chr1	1296400	1297157	3_TssFlnkU	MXRA8	chr1	1296400	1297157	9_EnhA1	MXRA8
chr1	1333800	1334600	1_TssA	CCNL2	chr1	1333800	1334400	2_TssFlnk	CCNL2
chr1	1336400	1337426	5_Tx	MRPL20-AS1	chr1	1336400	1337426	7_EnhG1	MRPL20-AS1
chr1	1341600	1341800	4_TssFlnkD	MRPL20	chr1	1341600	1341800	8_EnhG2	MRPL20
chr1	1353800	1354800	6_TxWk	ANKRD65	chr1	1353800	1355000	14_ReprPCWk	ANKRD65
chr1	1361508	1362800	14_ReprPCWk	TMEM88B	chr1	1361508	1362800	15_NA	TMEM88B
chr1	1371800	1372800	14_ReprPCWk	VWA1	chr1	1372000	1372600	12_TssBiv	VWA1
chr1	1372800	1376200	6_TxWk	VWA1	chr1	1373200	1376200	14_ReprPCWk	VWA1
chr1	1447531	1448000	2_TssFlnk	ATAD3A	chr1	1447531	1448200	1_TssA	ATAD3A
chr1	1448000	1448600	1_TssA	ATAD3A	chr1	1448200	1448600	4_TssFlnkD	ATAD3A
chr1	1448800	1449800	6_TxWk	ATAD3A	chr1	1449000	1450000	7_EnhG1	ATAD3A
chr1	1502000	1502600	7_EnhG1	SSU72	chr1	1502000	1502400	6_TxWk	SSU72
chr1	1508600	1508800	10_EnhA2	SSU72	chr1	1508600	1508800	9_EnhA1	SSU72
chr1	1511200	1511373	10_EnhA2	AL645728.1	chr1	1511200	1511373	11_EnhWk	AL645728.1
chr1	1551200	1552600	2_TssFlnk	MIB2	chr1	1551600	1552600	4_TssFlnkD	MIB2
chr1	1565800	1565990	13_ReprPC	MIB2	chr1	1565800	1565990	12_TssBiv	MIB2
chr1	1618400	1620000	6_TxWk	SLC35E2B	chr1	1619000	1620400	7_EnhG1	SLC35E2B
chr1	1622800	1623200	2_TssFlnk	SLC35E2B	chr1	1622800	1623200	4_TssFlnkD	SLC35E2B
chr1	1656277	1656600	1_TssA	SLC35E2A	chr1	1656277	1656600	3_TssFlnkU	SLC35E2A
chr1	1656800	1658400	6_TxWk	SLC35E2A	chr1	1656600	1658200	10_EnhA2	SLC35E2A
chr1	1707400	1708400	6_TxWk	NADK	chr1	1707400	1708600	11_EnhWk	NADK
chr1	1758000	1759200	9_EnhA1	GNB1	chr1	1757600	1759600	11_EnhWk	GNB1
chr1	1767200	1769200	6_TxWk	GNB1	chr1	1768000	1769800	5_Tx	GNB1
chr1	1791800	1794200	6_TxWk	GNB1	chr1	1791800	1795000	11_EnhWk	GNB1
chr1	1816800	1820000	6_TxWk	GNB1	chr1	1817600	1820000	11_EnhWk	GNB1
chr1	1820000	1821200	2_TssFlnk	GNB1	chr1	1820000	1821000	4_TssFlnkD	GNB1
chr1	1821800	1822495	2_TssFlnk	GNB1	chr1	1821400	1822495	1_TssA	GNB1
chr1	1853396	1857800	14_ReprPCWk	CFAP74	chr1	1853600	1856600	13_ReprPC	CFAP74
chr1	1957400	1958000	9_EnhA1	GABRD	chr1	1957600	1958200	13_ReprPC	GABRD
chr1	1992600	1993200	12_TssBiv	PRKCZ	chr1	1992800	1993400	14_ReprPCWk	PRKCZ
chr1	1993400	1994400	14_ReprPCWk	PRKCZ	chr1	1993400	1994600	13_ReprPC	PRKCZ
chr1	2031000	2031600	11_EnhWk	PRKCZ	chr1	2031200	2031600	12_TssBiv	PRKCZ
chr1	2031600	2032000	9_EnhA1	PRKCZ	chr1	2031600	2032200	11_EnhWk	PRKCZ
chr1	2065400	2067000	6_TxWk	PRKCZ	chr1	2065400	2067200	14_ReprPCWk	PRKCZ
chr1	2111200	2114200	6_TxWk	PRKCZ	chr1	2111600	2113400	14_ReprPCWk	PRKCZ
chr1	2114200	2116834	5_Tx	PRKCZ	chr1	2113400	2116834	6_TxWk	PRKCZ
chr1	2122000	2123179	6_TxWk	AL590822.2	chr1	2122200	2123179	11_EnhWk	AL590822.2
chr1	2122000	2123400	6_TxWk	AL590822.2	chr1	2122200	2123179	11_EnhWk	AL590822.2
chr1	2135800	2136200	3_TssFlnkU	FAAP20	chr1	2135800	2136400	4_TssFlnkD	FAAP20
chr1	2137200	2138600	6_TxWk	FAAP20	chr1	2137200	2138400	11_EnhWk	FAAP20
chr1	2138600	2140600	10_EnhA2	FAAP20	chr1	2138400	2140400	9_EnhA1	FAAP20
chr1	2162600	2163400	1_TssA	SKI	chr1	2162800	2163800	4_TssFlnkD	SKI
chr1	2165400	2166600	10_EnhA2	SKI	chr1	2165400	2166200	3_TssFlnkU	SKI
chr1	2166600	2172200	6_TxWk	SKI	chr1	2168400	2172600	7_EnhG1	SKI
chr1	2177800	2178200	9_EnhA1	SKI	chr1	2177800	2178400	4_TssFlnkD	SKI
chr1	2178400	2184200	6_TxWk	SKI	chr1	2178400	2184200	11_EnhWk	SKI
chr1	2184200	2185000	5_Tx	SKI	chr1	2184200	2184800	6_TxWk	SKI
chr1	2210800	2211600	10_EnhA2	SKI	chr1	2210800	2211600	11_EnhWk	SKI
chr1	2228200	2229600	5_Tx	SKI	chr1	2228400	2229800	6_TxWk	SKI
chr1	2230200	2232400	10_EnhA2	SKI	chr1	2229800	2233400	11_EnhWk	SKI
chr1	2252692	2254800	9_EnhA1	MORN1	chr1	2252692	2254200	11_EnhWk	MORN1
chr1	2306600	2307600	9_EnhA1	MORN1	chr1	2306800	2307400	11_EnhWk	MORN1
chr1	2307800	2310600	6_TxWk	MORN1	chr1	2307400	2310000	14_ReprPCWk	MORN1
chr1	2323267	2324600	2_TssFlnk	RER1	chr1	2323800	2324800	4_TssFlnkD	RER1
chr1	2342200	2343200	11_EnhWk	PEX10	chr1	2341800	2342800	6_TxWk	PEX10
chr1	2344000	2345000	2_TssFlnk	PEX10	chr1	2344400	2345000	4_TssFlnkD	PEX10
chr1	2381200	2383400	10_EnhA2	PLCH2	chr1	2381800	2383400	6_TxWk	PLCH2
chr1	2383400	2384600	9_EnhA1	PLCH2	chr1	2383400	2384800	11_EnhWk	PLCH2
chr1	2387200	2387800	10_EnhA2	PLCH2	chr1	2387000	2388000	11_EnhWk	PLCH2
chr1	2456800	2457200	4_TssFlnkD	PANK4	chr1	2456800	2457400	3_TssFlnkU	PANK4
chr1	2487078	2487400	14_ReprPCWk	TNFRSF14	chr1	2487078	2487600	11_EnhWk	TNFRSF14
chr1	2487600	2488000	1_TssA	TNFRSF14	chr1	2487600	2488200	4_TssFlnkD	TNFRSF14
chr1	2488600	2493400	15_NA	TNFRSF14	chr1	2489000	2495800	6_TxWk	TNFRSF14
chr1	2629000	2629400	12_TssBiv	TTC34	chr1	2629000	2629400	2_TssFlnk	TTC34
chr1	2938046	2939200	13_ReprPC	ACTRT2	chr1	2938046	2939465	14_ReprPCWk	ACTRT2
chr1	2985732	2987600	2_TssFlnk	PRDM16	chr1	2985732	2987600	12_TssBiv	PRDM16
chr1	3014200	3021800	15_NA	PRDM16	chr1	3014200	3025800	14_ReprPCWk	PRDM16
chr1	3079000	3087000	15_NA	PRDM16	chr1	3081200	3086800	14_ReprPCWk	PRDM16
chr1	3088800	3091000	6_TxWk	PRDM16	chr1	3089400	3091000	14_ReprPCWk	PRDM16
chr1	3092200	3103000	15_NA	PRDM16	chr1	3094000	3101600	14_ReprPCWk	PRDM16
chr1	3124200	3129400	15_NA	PRDM16	chr1	3126000	3129600	14_ReprPCWk	PRDM16
chr1	3129400	3133600	14_ReprPCWk	PRDM16	chr1	3129600	3133200	13_ReprPC	PRDM16
chr1	3137000	3147800	14_ReprPCWk	PRDM16	chr1	3136200	3149800	13_ReprPC	PRDM16
chr1	3166600	3179400	15_NA	PRDM16	chr1	3167600	3179800	14_ReprPCWk	PRDM16
chr1	3179400	3188000	14_ReprPCWk	PRDM16	chr1	3179800	3189600	13_ReprPC	PRDM16
chr1	3232600	3237000	6_TxWk	PRDM16	chr1	3232200	3236800	14_ReprPCWk	PRDM16
chr1	3264800	3267200	11_EnhWk	PRDM16	chr1	3264400	3267800	12_TssBiv	PRDM16
chr1	3270200	3283600	6_TxWk	PRDM16	chr1	3272000	3282800	13_ReprPC	PRDM16
chr1	3286600	3287000	10_EnhA2	PRDM16	chr1	3286600	3287200	9_EnhA1	PRDM16
chr1	3287000	3289200	6_TxWk	PRDM16	chr1	3287400	3289000	14_ReprPCWk	PRDM16
chr1	3310600	3314400	14_ReprPCWk	PRDM16	chr1	3310400	3316200	13_ReprPC	PRDM16
chr1	3411200	3412600	9_EnhA1	MEGF6	chr1	3411200	3413200	11_EnhWk	MEGF6
chr1	3427600	3432200	13_ReprPC	MEGF6	chr1	3426000	3432400	14_ReprPCWk	MEGF6
chr1	3458800	3460800	9_EnhA1	MEGF6	chr1	3458600	3461800	11_EnhWk	MEGF6
chr1	3463200	3463800	10_EnhA2	MEGF6	chr1	3463200	3463600	11_EnhWk	MEGF6
chr1	3489800	3493000	13_ReprPC	MEGF6	chr1	3491000	3494200	14_ReprPCWk	MEGF6
chr1	3542200	3542600	3_TssFlnkU	TPRG1L	chr1	3542000	3542600	4_TssFlnkD	TPRG1L
chr1	3542600	3542800	9_EnhA1	TPRG1L	chr1	3542600	3542800	11_EnhWk	TPRG1L
chr1	3588000	3589200	9_EnhA1	TP73	chr1	3587800	3589400	11_EnhWk	TP73
chr1	3589400	3590200	6_TxWk	TP73	chr1	3589400	3590200	14_ReprPCWk	TP73
chr1	3689600	3691600	6_TxWk	SMIM1	chr1	3689352	3692546	11_EnhWk	SMIM1
chr1	3712600	3713068	2_TssFlnk	LRRC47	chr1	3712400	3713000	1_TssA	LRRC47
chr1	3773845	3774800	2_TssFlnk	DFFB	chr1	3774000	3774600	4_TssFlnkD	DFFB
chr1	3779400	3780200	10_EnhA2	DFFB	chr1	3779400	3780000	11_EnhWk	DFFB
chr1	3809600	3811800	6_TxWk	C1orf174	chr1	3810400	3812000	5_Tx	C1orf174
chr1	3812000	3813400	9_EnhA1	C1orf174	chr1	3812000	3813600	11_EnhWk	C1orf174
chr1	3815800	3816200	2_TssFlnk	C1orf174	chr1	3815800	3816400	4_TssFlnkD	C1orf174
chr1	6074400	6075600	10_EnhA2	KCNAB2	chr1	6073800	6075400	11_EnhWk	KCNAB2
chr1	6121000	6125000	13_ReprPC	KCNAB2	chr1	6120000	6123600	14_ReprPCWk	KCNAB2
chr1	6230400	6231200	14_ReprPCWk	CHD5	chr1	6230600	6231400	12_TssBiv	CHD5
chr1	6257600	6258200	6_TxWk	RPL22	chr1	6257400	6258200	7_EnhG1	RPL22
chr1	6273600	6281000	15_NA	RNF207	chr1	6269800	6280000	6_TxWk	RNF207
chr1	6281253	6282200	6_TxWk	ICMT	chr1	6281253	6282000	5_Tx	ICMT
chr1	6294400	6295200	3_TssFlnkU	ICMT	chr1	6294600	6295600	4_TssFlnkD	ICMT
chr1	6307406	6308600	6_TxWk	GPR153	chr1	6307600	6309000	13_ReprPC	GPR153
chr1	6309000	6310400	6_TxWk	GPR153	chr1	6309000	6310200	12_TssBiv	GPR153
chr1	6317800	6319600	6_TxWk	GPR153	chr1	6317400	6319600	11_EnhWk	GPR153
chr1	6319600	6320400	2_TssFlnk	GPR153	chr1	6319600	6320200	4_TssFlnkD	GPR153
chr1	6320400	6321035	1_TssA	GPR153	chr1	6320400	6321000	4_TssFlnkD	GPR153
chr1	6324329	6325200	6_TxWk	ACOT7	chr1	6324329	6325400	11_EnhWk	ACOT7
chr1	6325400	6326400	9_EnhA1	ACOT7	chr1	6325400	6326000	6_TxWk	ACOT7
chr1	6329600	6331200	9_EnhA1	ACOT7	chr1	6329800	6330800	11_EnhWk	ACOT7
chr1	6331200	6333600	11_EnhWk	ACOT7	chr1	6331800	6334400	5_Tx	ACOT7
chr1	6334800	6335400	6_TxWk	ACOT7	chr1	6334800	6335200	5_Tx	ACOT7
chr1	6341000	6342600	9_EnhA1	ACOT7	chr1	6341000	6342800	11_EnhWk	ACOT7
chr1	6350400	6352400	9_EnhA1	ACOT7	chr1	6350400	6352400	11_EnhWk	ACOT7
chr1	6352400	6353000	10_EnhA2	ACOT7	chr1	6352400	6353000	6_TxWk	ACOT7
chr1	6355600	6355800	10_EnhA2	ACOT7	chr1	6355600	6355800	11_EnhWk	ACOT7
chr1	6359400	6361000	9_EnhA1	ACOT7	chr1	6359600	6360600	10_EnhA2	ACOT7
chr1	6373800	6375800	10_EnhA2	ACOT7	chr1	6374600	6375800	6_TxWk	ACOT7
chr1	6379600	6380200	9_EnhA1	ACOT7	chr1	6379800	6380200	11_EnhWk	ACOT7
chr1	6384800	6385600	5_Tx	ACOT7	chr1	6385000	6385600	11_EnhWk	ACOT7
chr1	6386600	6388000	6_TxWk	ACOT7	chr1	6386400	6387600	5_Tx	ACOT7
chr1	6392600	6393200	7_EnhG1	ACOT7	chr1	6392600	6393600	5_Tx	ACOT7
chr1	6405600	6406600	7_EnhG1	ACOT7	chr1	6405600	6406600	5_Tx	ACOT7
chr1	6418600	6421000	9_EnhA1	ACOT7	chr1	6418400	6420200	11_EnhWk	ACOT7
chr1	6445000	6445800	9_EnhA1	ACOT7	chr1	6444600	6445600	11_EnhWk	ACOT7
chr1	6452600	6453600	2_TssFlnk	ACOT7	chr1	6452400	6453200	4_TssFlnkD	ACOT7
chr1	6454200	6454400	3_TssFlnkU	ACOT7	chr1	6454200	6454400	4_TssFlnkD	ACOT7
chr1	6454400	6454451	9_EnhA1	ACOT7	chr1	6454400	6454451	11_EnhWk	ACOT7
chr1	6547200	6548200	5_Tx	PLEKHG5	chr1	6547000	6548000	6_TxWk	PLEKHG5
chr1	6548200	6548800	6_TxWk	PLEKHG5	chr1	6548000	6548600	5_Tx	PLEKHG5
chr1	6552000	6555000	7_EnhG1	PLEKHG5	chr1	6552600	6555000	6_TxWk	PLEKHG5
chr1	6561200	6562200	9_EnhA1	PLEKHG5	chr1	6561600	6562200	11_EnhWk	PLEKHG5
chr1	6563600	6565400	10_EnhA2	PLEKHG5	chr1	6564200	6565800	14_ReprPCWk	PLEKHG5
chr1	6588000	6589600	9_EnhA1	NOL9	chr1	6587800	6589800	7_EnhG1	NOL9
chr1	6613000	6613200	2_TssFlnk	NOL9	chr1	6613000	6613200	8_EnhG2	NOL9
chr1	6613400	6614000	2_TssFlnk	NOL9	chr1	6613200	6614000	4_TssFlnkD	NOL9
chr1	6633400	6635200	6_TxWk	TAS1R1	chr1	6633400	6634600	14_ReprPCWk	TAS1R1
chr1	6639600	6639817	1_TssA	TAS1R1	chr1	6639600	6639800	4_TssFlnkD	TAS1R1
chr1	6684926	6685000	4_TssFlnkD	THAP3	chr1	6684926	6685000	11_EnhWk	THAP3
chr1	6698200	6699200	9_EnhA1	DNAJC11	chr1	6698200	6699000	11_EnhWk	DNAJC11
chr1	6977400	6982600	15_NA	CAMTA1	chr1	6978400	6982200	6_TxWk	CAMTA1
chr1	7179600	7182000	6_TxWk	CAMTA1	chr1	7180000	7183200	14_ReprPCWk	CAMTA1
chr1	7279800	7280800	10_EnhA2	CAMTA1	chr1	7280000	7280600	11_EnhWk	CAMTA1
chr1	7350800	7351000	10_EnhA2	CAMTA1	chr1	7350800	7351000	11_EnhWk	CAMTA1
chr1	7375600	7391400	6_TxWk	CAMTA1	chr1	7374600	7387600	15_NA	CAMTA1
chr1	7394200	7395400	9_EnhA1	CAMTA1	chr1	7394200	7395600	11_EnhWk	CAMTA1
chr1	7411200	7439200	15_NA	CAMTA1	chr1	7416600	7438800	14_ReprPCWk	CAMTA1
chr1	7440200	7447800	15_NA	CAMTA1	chr1	7439800	7448200	14_ReprPCWk	CAMTA1
chr1	7448000	7449600	9_EnhA1	CAMTA1	chr1	7448200	7450400	11_EnhWk	CAMTA1
chr1	7462000	7463000	9_EnhA1	CAMTA1	chr1	7461400	7463000	11_EnhWk	CAMTA1
chr1	7522800	7528400	6_TxWk	CAMTA1	chr1	7521600	7528600	14_ReprPCWk	CAMTA1
chr1	7532600	7537800	15_NA	CAMTA1	chr1	7532200	7536000	14_ReprPCWk	CAMTA1
chr1	7538200	7539600	9_EnhA1	CAMTA1	chr1	7538200	7539400	10_EnhA2	CAMTA1
chr1	7544800	7545000	10_EnhA2	CAMTA1	chr1	7544800	7545000	11_EnhWk	CAMTA1
chr1	7581600	7582400	10_EnhA2	CAMTA1	chr1	7581400	7582600	11_EnhWk	CAMTA1
chr1	7582400	7586400	6_TxWk	CAMTA1	chr1	7582600	7586800	14_ReprPCWk	CAMTA1
chr1	7587400	7594000	15_NA	CAMTA1	chr1	7588400	7594200	14_ReprPCWk	CAMTA1
chr1	7594000	7595000	10_EnhA2	CAMTA1	chr1	7594200	7595200	11_EnhWk	CAMTA1
chr1	7595000	7597200	6_TxWk	CAMTA1	chr1	7595400	7598200	13_ReprPC	CAMTA1
chr1	7597800	7609000	15_NA	CAMTA1	chr1	7598200	7607600	14_ReprPCWk	CAMTA1
chr1	7616800	7621800	6_TxWk	CAMTA1	chr1	7616200	7622200	15_NA	CAMTA1
chr1	7739800	7740000	9_EnhA1	CAMTA1	chr1	7739800	7740000	12_TssBiv	CAMTA1
chr1	7788400	7789000	12_TssBiv	CAMTA1	chr1	7788200	7788800	13_ReprPC	CAMTA1
chr1	7844380	7845000	2_TssFlnk	PER3	chr1	7844400	7845200	4_TssFlnkD	PER3
chr1	7907600	7908200	10_EnhA2	UTS2	chr1	7907600	7908200	11_EnhWk	UTS2
chr1	7979907	7981600	15_NA	TNFRSF9	chr1	7979907	7981200	14_ReprPCWk	TNFRSF9
chr1	7982000	7982600	9_EnhA1	TNFRSF9	chr1	7982000	7982600	3_TssFlnkU	TNFRSF9
chr1	8014351	8015000	2_TssFlnk	PARK7	chr1	8014400	8015000	4_TssFlnkD	PARK7
chr1	8020600	8021000	2_TssFlnk	PARK7	chr1	8020600	8021000	4_TssFlnkD	PARK7
chr1	8022800	8023200	11_EnhWk	PARK7	chr1	8022800	8023200	9_EnhA1	PARK7
chr1	8080800	8081800	6_TxWk	ERRFI1	chr1	8081000	8082200	11_EnhWk	ERRFI1
chr1	8082200	8082600	1_TssA	ERRFI1	chr1	8082200	8082600	4_TssFlnkD	ERRFI1
chr1	8082600	8083200	10_EnhA2	ERRFI1	chr1	8082600	8083200	8_EnhG2	ERRFI1
chr1	8378600	8384800	14_ReprPCWk	SLC45A1	chr1	8380000	8387600	6_TxWk	SLC45A1
chr1	8403000	8404227	9_EnhA1	SLC45A1	chr1	8403000	8404227	11_EnhWk	SLC45A1
chr1	8412457	8413400	5_Tx	RERE	chr1	8412457	8413800	7_EnhG1	RERE
chr1	8427000	8428200	9_EnhA1	RERE	chr1	8426800	8427800	6_TxWk	RERE
chr1	8434800	8435200	11_EnhWk	RERE	chr1	8434800	8435200	7_EnhG1	RERE
chr1	8444200	8445600	9_EnhA1	RERE	chr1	8444200	8445600	7_EnhG1	RERE
chr1	8445600	8446600	10_EnhA2	RERE	chr1	8445600	8446400	6_TxWk	RERE
chr1	8454600	8455400	10_EnhA2	RERE	chr1	8454600	8455600	11_EnhWk	RERE
chr1	8464600	8466600	5_Tx	RERE	chr1	8463800	8467000	6_TxWk	RERE
chr1	8469800	8471400	11_EnhWk	RERE	chr1	8470000	8471400	7_EnhG1	RERE
chr1	8479800	8480800	7_EnhG1	RERE	chr1	8479200	8480800	11_EnhWk	RERE
chr1	8480800	8481600	6_TxWk	RERE	chr1	8480800	8481600	4_TssFlnkD	RERE
chr1	8508600	8509000	6_TxWk	RERE	chr1	8508600	8509000	11_EnhWk	RERE
chr1	8576800	8578200	9_EnhA1	RERE	chr1	8576800	8578600	11_EnhWk	RERE
chr1	8585400	8586200	1_TssA	RERE	chr1	8585200	8586200	3_TssFlnkU	RERE
chr1	8600600	8601600	10_EnhA2	RERE	chr1	8600200	8601800	11_EnhWk	RERE
chr1	8632200	8642600	15_NA	RERE	chr1	8632200	8640600	6_TxWk	RERE
chr1	8658200	8659200	9_EnhA1	RERE	chr1	8658200	8659200	11_EnhWk	RERE
chr1	8685600	8687200	9_EnhA1	RERE	chr1	8685400	8687600	11_EnhWk	RERE
chr1	8699600	8707200	15_NA	RERE	chr1	8701000	8707800	6_TxWk	RERE
chr1	8761200	8761800	9_EnhA1	RERE	chr1	8761400	8761800	2_TssFlnk	RERE
chr1	8761800	8762600	3_TssFlnkU	RERE	chr1	8761800	8762600	4_TssFlnkD	RERE
chr1	8762600	8763200	1_TssA	RERE	chr1	8762600	8763200	2_TssFlnk	RERE
chr1	8773200	8782200	15_NA	RERE	chr1	8773800	8786400	6_TxWk	RERE
chr1	8927000	8931800	5_Tx	ENO1	chr1	8928400	8933800	7_EnhG1	ENO1
chr1	9005926	9009000	15_NA	CA6	chr1	9005926	9009200	14_ReprPCWk	CA6
chr1	9074600	9086404	14_ReprPCWk	SLC2A7	chr1	9075400	9084200	13_ReprPC	SLC2A7
chr1	9101200	9107200	6_TxWk	SLC2A5	chr1	9102200	9105800	14_ReprPCWk	SLC2A5
chr1	9129200	9130000	3_TssFlnkU	SLC2A5	chr1	9129000	9129800	4_TssFlnkD	SLC2A5
chr1	9130000	9130600	10_EnhA2	SLC2A5	chr1	9129800	9130600	11_EnhWk	SLC2A5
chr1	9130600	9137800	15_NA	SLC2A5	chr1	9130600	9138000	14_ReprPCWk	SLC2A5
chr1	9138000	9139200	9_EnhA1	SLC2A5	chr1	9138000	9138800	11_EnhWk	SLC2A5
chr1	9144800	9146800	9_EnhA1	SLC2A5	chr1	9144600	9146600	11_EnhWk	SLC2A5
chr1	9147000	9148537	14_ReprPCWk	SLC2A5	chr1	9147000	9148537	13_ReprPC	SLC2A5
chr1	9188000	9189229	2_TssFlnk	GPR157	chr1	9188000	9189000	4_TssFlnkD	GPR157
chr1	9294834	9295800	1_TssA	H6PD	chr1	9295200	9295800	3_TssFlnkU	H6PD
chr1	9427000	9429591	5_Tx	SPSB1	chr1	9428000	9429591	6_TxWk	SPSB1
chr1	9599541	9600200	1_TssA	SLC25A33	chr1	9599541	9600600	4_TssFlnkD	SLC25A33
chr1	9615200	9616000	6_TxWk	SLC25A33	chr1	9615200	9615800	11_EnhWk	SLC25A33
chr1	9668400	9670400	6_TxWk	TMEM201	chr1	9668000	9670000	5_Tx	TMEM201
chr1	9670400	9671000	5_Tx	TMEM201	chr1	9670000	9671000	6_TxWk	TMEM201
chr1	9732000	9747200	15_NA	PIK3CD	chr1	9734400	9743800	14_ReprPCWk	PIK3CD
chr1	9876400	9882600	15_NA	CLSTN1	chr1	9877200	9882000	6_TxWk	CLSTN1
chr1	9912400	9913200	9_EnhA1	CTNNBIP1	chr1	9912200	9913000	11_EnhWk	CTNNBIP1
chr1	9982173	9986600	15_NA	LZIC	chr1	9982173	9987800	6_TxWk	LZIC
chr1	10004000	10004400	2_TssFlnk	NMNAT1	chr1	10004000	10004400	4_TssFlnkD	NMNAT1
chr1	10094200	10094800	2_TssFlnk	UBE4B	chr1	10094400	10095000	4_TssFlnkD	UBE4B
chr1	10116400	10117600	10_EnhA2	UBE4B	chr1	10116600	10118200	11_EnhWk	UBE4B
chr1	10127200	10127800	10_EnhA2	UBE4B	chr1	10127200	10127800	11_EnhWk	UBE4B
chr1	10168200	10168800	9_EnhA1	UBE4B	chr1	10168400	10169000	11_EnhWk	UBE4B
chr1	10211800	10215000	6_TxWk	UBE4B	chr1	10212600	10215400	10_EnhA2	UBE4B
chr1	10274200	10276600	6_TxWk	KIF1B	chr1	10274000	10278000	11_EnhWk	KIF1B
chr1	10333000	10333400	5_Tx	KIF1B	chr1	10332800	10333400	7_EnhG1	KIF1B
chr1	10367200	10368800	7_EnhG1	KIF1B	chr1	10366600	10368400	6_TxWk	KIF1B
chr1	10439000	10440400	5_Tx	KIF1B	chr1	10439400	10440600	6_TxWk	KIF1B
chr1	10441600	10441661	5_Tx	KIF1B	chr1	10441600	10441661	6_TxWk	KIF1B
chr1	10591600	10599400	15_NA	PEX14	chr1	10589400	10598000	6_TxWk	PEX14
chr1	10615600	10617000	9_EnhA1	PEX14	chr1	10615800	10616800	11_EnhWk	PEX14
chr1	10635400	10635800	9_EnhA1	PEX14	chr1	10635200	10635800	11_EnhWk	PEX14
chr1	10657800	10660400	9_EnhA1	PEX14	chr1	10657600	10659600	11_EnhWk	PEX14
chr1	10671000	10671600	10_EnhA2	PEX14	chr1	10670800	10671400	11_EnhWk	PEX14
chr1	10704200	10705000	10_EnhA2	CASZ1	chr1	10704200	10705000	11_EnhWk	CASZ1
chr1	10707600	10720600	5_Tx	CASZ1	chr1	10712000	10720800	13_ReprPC	CASZ1
chr1	10720600	10723000	6_TxWk	CASZ1	chr1	10720800	10722400	14_ReprPCWk	CASZ1
chr1	10744000	10744800	6_TxWk	CASZ1	chr1	10743600	10744600	13_ReprPC	CASZ1
chr1	10744800	10745400	9_EnhA1	CASZ1	chr1	10744600	10745200	12_TssBiv	CASZ1
chr1	10788200	10793000	6_TxWk	CASZ1	chr1	10788800	10792600	14_ReprPCWk	CASZ1
chr1	10805000	10806000	14_ReprPCWk	CASZ1	chr1	10804800	10806200	13_ReprPC	CASZ1
chr1	10817800	10820800	5_Tx	CASZ1	chr1	10817200	10821000	13_ReprPC	CASZ1
chr1	10854200	10855800	1_TssA	CASZ1	chr1	10853400	10856000	12_TssBiv	CASZ1
chr1	10856400	10856600	1_TssA	CASZ1	chr1	10856400	10856600	12_TssBiv	CASZ1
chr1	11034600	11035400	6_TxWk	C1orf127	chr1	11034800	11035800	14_ReprPCWk	C1orf127
chr1	11041200	11041400	11_EnhWk	C1orf127	chr1	11041200	11041400	14_ReprPCWk	C1orf127
chr1	11086580	11087000	6_TxWk	MASP2	chr1	11086580	11087200	5_Tx	MASP2
chr1	11118600	11119000	6_TxWk	SRM	chr1	11118600	11119000	11_EnhWk	SRM
chr1	11194000	11195800	9_EnhA1	MTOR	chr1	11194200	11195600	11_EnhWk	MTOR
chr1	11211000	11211400	7_EnhG1	MTOR	chr1	11211000	11211600	11_EnhWk	MTOR
chr1	11211400	11213000	9_EnhA1	MTOR	chr1	11212000	11213000	11_EnhWk	MTOR
chr1	11247600	11249600	9_EnhA1	MTOR	chr1	11247800	11249400	7_EnhG1	MTOR
chr1	11321600	11322200	2_TssFlnk	MTOR	chr1	11321600	11322000	4_TssFlnkD	MTOR
chr1	11333263	11334200	1_TssA	UBIAD1	chr1	11333600	11334600	4_TssFlnkD	UBIAD1
chr1	11354200	11356106	5_Tx	UBIAD1	chr1	11353200	11356106	6_TxWk	UBIAD1
chr1	11740400	11740800	2_TssFlnk	MAD2L2	chr1	11740400	11740800	4_TssFlnkD	MAD2L2
chr1	11740800	11741800	1_TssA	MAD2L2	chr1	11741000	11741600	2_TssFlnk	MAD2L2
chr1	11753800	11760200	14_ReprPCWk	DRAXIN	chr1	11754000	11760600	13_ReprPC	DRAXIN
chr1	11761200	11762400	9_EnhA1	DRAXIN	chr1	11760600	11762200	12_TssBiv	DRAXIN
chr1	11772200	11779000	14_ReprPCWk	DRAXIN	chr1	11771000	11779400	13_ReprPC	DRAXIN
chr1	11779000	11780000	13_ReprPC	DRAXIN	chr1	11779400	11780000	12_TssBiv	DRAXIN
chr1	11814000	11814859	14_ReprPCWk	AGTRAP	chr1	11813600	11814859	13_ReprPC	AGTRAP
chr1	11842200	11846400	15_NA	C1orf167	chr1	11842200	11844800	6_TxWk	C1orf167
chr1	11845780	11846400	15_NA	MTHFR	chr1	11845780	11846200	11_EnhWk	MTHFR
chr1	11851000	11853200	9_EnhA1	MTHFR	chr1	11850200	11853200	7_EnhG1	MTHFR
chr1	11855600	11857000	9_EnhA1	MTHFR	chr1	11856000	11857200	11_EnhWk	MTHFR
chr1	11861800	11862000	6_TxWk	MTHFR	chr1	11861800	11862000	11_EnhWk	MTHFR
chr1	11862600	11863800	1_TssA	MTHFR	chr1	11862600	11864000	4_TssFlnkD	MTHFR
chr1	11866600	11866977	3_TssFlnkU	MTHFR	chr1	11866600	11866977	4_TssFlnkD	MTHFR
chr1	11866600	11867400	3_TssFlnkU	CLCN6	chr1	11866600	11867600	4_TssFlnkD	CLCN6
chr1	11985400	11986485	2_TssFlnk	KIAA2013	chr1	11985000	11986200	4_TssFlnkD	KIAA2013
chr1	12003200	12004600	6_TxWk	PLOD1	chr1	12002800	12004800	7_EnhG1	PLOD1
chr1	12041000	12041600	2_TssFlnk	MFN2	chr1	12041000	12041400	4_TssFlnkD	MFN2
chr1	12041800	12043000	6_TxWk	MFN2	chr1	12041400	12042800	11_EnhWk	MFN2
chr1	12080000	12080400	2_TssFlnk	MIIP	chr1	12080000	12080400	4_TssFlnkD	MIIP
chr1	12127800	12128800	9_EnhA1	TNFRSF8	chr1	12127800	12128600	11_EnhWk	TNFRSF8
chr1	12176000	12179800	14_ReprPCWk	TNFRSF8	chr1	12175200	12178600	13_ReprPC	TNFRSF8
chr1	12203400	12204264	9_EnhA1	TNFRSF8	chr1	12203200	12204264	11_EnhWk	TNFRSF8
chr1	12227060	12227600	12_TssBiv	TNFRSF1B	chr1	12227060	12227800	4_TssFlnkD	TNFRSF1B
chr1	12308200	12309800	5_Tx	VPS13D	chr1	12307200	12309800	6_TxWk	VPS13D
chr1	12536800	12537400	10_EnhA2	VPS13D	chr1	12536600	12537600	6_TxWk	VPS13D
chr1	12570200	12571400	6_TxWk	VPS13D	chr1	12570600	12571400	11_EnhWk	VPS13D
chr1	12571400	12572099	11_EnhWk	VPS13D	chr1	12571400	12572000	6_TxWk	VPS13D
chr1	12627939	12628600	13_ReprPC	DHRS3	chr1	12627939	12628800	5_Tx	DHRS3
chr1	12628600	12630200	14_ReprPCWk	DHRS3	chr1	12628800	12630600	6_TxWk	DHRS3
chr1	12639600	12641400	9_EnhA1	DHRS3	chr1	12639600	12641000	11_EnhWk	DHRS3
chr1	12645600	12650200	13_ReprPC	DHRS3	chr1	12646600	12650000	14_ReprPCWk	DHRS3
chr1	12650600	12652000	9_EnhA1	DHRS3	chr1	12650000	12652200	11_EnhWk	DHRS3
chr1	12655200	12655800	10_EnhA2	DHRS3	chr1	12655000	12656000	11_EnhWk	DHRS3
chr1	12675200	12675400	9_EnhA1	DHRS3	chr1	12675200	12675400	4_TssFlnkD	DHRS3
chr1	12709800	12710600	10_EnhA2	AADACL4	chr1	12709800	12711000	11_EnhWk	AADACL4
chr1	13909960	13911800	2_TssFlnk	PDPN	chr1	13909960	13911600	12_TssBiv	PDPN
chr1	13926400	13928200	9_EnhA1	PDPN	chr1	13926000	13927800	11_EnhWk	PDPN
chr1	14026800	14027200	2_TssFlnk	PRDM2	chr1	14026693	14027200	1_TssA	PRDM2
chr1	14074800	14075000	11_EnhWk	PRDM2	chr1	14074800	14075000	10_EnhA2	PRDM2
chr1	14078600	14078800	9_EnhA1	PRDM2	chr1	14078600	14078800	4_TssFlnkD	PRDM2
chr1	14089400	14091000	6_TxWk	PRDM2	chr1	14089000	14091200	11_EnhWk	PRDM2
chr1	14118200	14119400	9_EnhA1	PRDM2	chr1	14118000	14119200	11_EnhWk	PRDM2
chr1	14929400	14931000	6_TxWk	KAZN	chr1	14929200	14931000	14_ReprPCWk	KAZN
chr1	14987400	14987800	9_EnhA1	KAZN	chr1	14987400	14987800	11_EnhWk	KAZN
chr1	14988000	15001200	15_NA	KAZN	chr1	14987800	14998600	14_ReprPCWk	KAZN
chr1	15026800	15027600	10_EnhA2	KAZN	chr1	15026600	15027800	11_EnhWk	KAZN
chr1	15027600	15035600	14_ReprPCWk	KAZN	chr1	15028800	15034400	15_NA	KAZN
chr1	15051200	15053800	14_ReprPCWk	KAZN	chr1	15052200	15053800	13_ReprPC	KAZN
chr1	15054000	15059400	15_NA	KAZN	chr1	15053800	15059000	14_ReprPCWk	KAZN
chr1	15229800	15245000	15_NA	KAZN	chr1	15228400	15243600	14_ReprPCWk	KAZN
chr1	15253000	15255600	6_TxWk	KAZN	chr1	15253600	15256000	13_ReprPC	KAZN
chr1	15255800	15257000	9_EnhA1	KAZN	chr1	15256200	15257400	11_EnhWk	KAZN
chr1	15257600	15266000	15_NA	KAZN	chr1	15257600	15264000	14_ReprPCWk	KAZN
chr1	15266200	15267200	9_EnhA1	KAZN	chr1	15266600	15267600	11_EnhWk	KAZN
chr1	15274400	15274800	11_EnhWk	KAZN	chr1	15274400	15274800	2_TssFlnk	KAZN
chr1	15280200	15290400	5_Tx	KAZN	chr1	15277200	15287400	6_TxWk	KAZN
chr1	15296200	15297000	10_EnhA2	KAZN	chr1	15295800	15297000	11_EnhWk	KAZN
chr1	15297000	15297600	9_EnhA1	KAZN	chr1	15297000	15297400	4_TssFlnkD	KAZN
chr1	15315000	15315600	9_EnhA1	KAZN	chr1	15314800	15315800	12_TssBiv	KAZN
chr1	15359200	15360800	10_EnhA2	KAZN	chr1	15359800	15361000	11_EnhWk	KAZN
chr1	15369200	15370000	9_EnhA1	KAZN	chr1	15369000	15369800	11_EnhWk	KAZN
chr1	15434600	15439200	15_NA	KAZN	chr1	15435000	15437800	14_ReprPCWk	KAZN
chr1	15439200	15443800	6_TxWk	KAZN	chr1	15439200	15443000	14_ReprPCWk	KAZN
chr1	15479028	15481200	2_TssFlnk	TMEM51	chr1	15479028	15481200	12_TssBiv	TMEM51
chr1	15481200	15482400	14_ReprPCWk	TMEM51	chr1	15481200	15482800	13_ReprPC	TMEM51
chr1	15482400	15494600	15_NA	TMEM51	chr1	15482800	15499200	14_ReprPCWk	TMEM51
chr1	15513400	15518400	15_NA	TMEM51	chr1	15512800	15516600	14_ReprPCWk	TMEM51
chr1	15523800	15527000	6_TxWk	TMEM51	chr1	15523600	15527000	14_ReprPCWk	TMEM51
chr1	15590200	15592200	13_ReprPC	FHAD1	chr1	15590600	15591800	14_ReprPCWk	FHAD1
chr1	15683600	15694200	6_TxWk	FHAD1	chr1	15681400	15690600	15_NA	FHAD1
chr1	15723200	15726200	6_TxWk	FHAD1	chr1	15722400	15726779	14_ReprPCWk	FHAD1
chr1	15752000	15753000	7_EnhG1	EFHD2	chr1	15751800	15753000	6_TxWk	EFHD2
chr1	15766000	15773200	14_ReprPCWk	CTRC	chr1	15766800	15774600	13_ReprPC	CTRC
chr1	15783223	15786600	6_TxWk	CELA2A	chr1	15784000	15786600	14_ReprPCWk	CELA2A
chr1	15798000	15811800	6_TxWk	CELA2B	chr1	15799800	15811800	14_ReprPCWk	CELA2B
chr1	15840600	15844400	5_Tx	CASP9	chr1	15839400	15843200	6_TxWk	CASP9
chr1	15852200	15853000	3_TssFlnkU	CASP9	chr1	15852200	15853000	9_EnhA1	CASP9
chr1	15853000	15853029	1_TssA	CASP9	chr1	15853000	15853029	10_EnhA2	CASP9
chr1	15897200	15898000	11_EnhWk	DNAJC16	chr1	15897000	15897800	6_TxWk	DNAJC16
chr1	15911600	15911605	6_TxWk	AGMAT	chr1	15911600	15911605	11_EnhWk	AGMAT
chr1	15911600	15918874	6_TxWk	DNAJC16	chr1	15914000	15918874	14_ReprPCWk	DNAJC16
chr1	16031400	16031600	7_EnhG1	PLEKHM2	chr1	16031400	16031600	10_EnhA2	PLEKHM2
chr1	16049400	16051400	7_EnhG1	PLEKHM2	chr1	16049400	16050600	11_EnhWk	PLEKHM2
chr1	16062900	16063400	9_EnhA1	SLC25A34	chr1	16062900	16063200	11_EnhWk	SLC25A34
chr1	16063400	16065600	10_EnhA2	SLC25A34	chr1	16063200	16065000	7_EnhG1	SLC25A34
chr1	16065600	16067891	6_TxWk	SLC25A34	chr1	16066200	16067891	15_NA	SLC25A34
chr1	16068917	16074477	6_TxWk	TMEM82	chr1	16068917	16074477	15_NA	TMEM82
chr1	16083102	16083800	6_TxWk	FBLIM1	chr1	16083200	16084000	13_ReprPC	FBLIM1
chr1	16084400	16087000	1_TssA	FBLIM1	chr1	16084000	16086000	12_TssBiv	FBLIM1
chr1	16087000	16088000	3_TssFlnkU	FBLIM1	chr1	16087200	16088000	12_TssBiv	FBLIM1
chr1	16112400	16113000	7_EnhG1	FBLIM1	chr1	16112400	16113089	11_EnhWk	FBLIM1
chr1	16213600	16217200	6_TxWk	SPEN	chr1	16214200	16219200	11_EnhWk	SPEN
chr1	16219000	16220000	10_EnhA2	SPEN	chr1	16219200	16220400	9_EnhA1	SPEN
chr1	16243200	16244400	7_EnhG1	SPEN	chr1	16242800	16244000	9_EnhA1	SPEN
chr1	16245800	16246600	10_EnhA2	SPEN	chr1	16245600	16246600	11_EnhWk	SPEN
chr1	16301200	16301400	2_TssFlnk	ZBTB17	chr1	16301200	16301400	11_EnhWk	ZBTB17
chr1	16301800	16302600	1_TssA	ZBTB17	chr1	16302000	16302600	2_TssFlnk	ZBTB17
chr1	16330731	16335302	14_ReprPCWk	SRARP	chr1	16330731	16333600	13_ReprPC	SRARP
chr1	16345370	16346800	9_EnhA1	CLCNKA	chr1	16345800	16347000	11_EnhWk	CLCNKA
chr1	16347000	16351600	14_ReprPCWk	CLCNKA	chr1	16347600	16353600	13_ReprPC	CLCNKA
chr1	16370272	16375000	14_ReprPCWk	CLCNKB	chr1	16370272	16375000	13_ReprPC	CLCNKB
chr1	16467800	16468800	9_EnhA1	EPHA2	chr1	16468200	16468800	11_EnhWk	EPHA2
chr1	16470200	16471200	7_EnhG1	EPHA2	chr1	16469800	16470800	5_Tx	EPHA2
chr1	16477000	16477400	11_EnhWk	EPHA2	chr1	16477000	16477400	7_EnhG1	EPHA2
chr1	16479400	16481000	3_TssFlnkU	EPHA2	chr1	16479000	16480400	4_TssFlnkD	EPHA2
chr1	16481000	16482582	1_TssA	EPHA2	chr1	16480400	16482000	2_TssFlnk	EPHA2
chr1	16524349	16532800	15_NA	ARHGEF19	chr1	16524349	16532400	14_ReprPCWk	ARHGEF19
chr1	16555368	16556038	14_ReprPCWk	C1orf134	chr1	16555368	16556038	13_ReprPC	C1orf134
chr1	16563200	16563657	1_TssA	CPLANE2	chr1	16563000	16563657	4_TssFlnkD	CPLANE2
chr1	16579400	16580800	6_TxWk	FBXO42	chr1	16579400	16581400	11_EnhWk	FBXO42
chr1	16679070	16679600	1_TssA	SZRD1	chr1	16679200	16679600	4_TssFlnkD	SZRD1
chr1	16695200	16695400	2_TssFlnk	SZRD1	chr1	16695200	16695400	4_TssFlnkD	SZRD1
chr1	16700600	16702600	10_EnhA2	SZRD1	chr1	16700400	16703200	11_EnhWk	SZRD1
chr1	16768400	16769200	6_TxWk	NECAP2	chr1	16768400	16769200	7_EnhG1	NECAP2
chr1	17066768	17067000	1_TssA	CROCC	chr1	17066768	17067000	3_TssFlnkU	CROCC
chr1	17122600	17124600	12_TssBiv	CROCC	chr1	17123000	17125600	13_ReprPC	CROCC
chr1	17215200	17215600	2_TssFlnk	CROCC	chr1	17215200	17215600	4_TssFlnkD	CROCC
chr1	17232600	17233200	10_EnhA2	CROCC	chr1	17232800	17233200	11_EnhWk	CROCC
chr1	17233200	17240000	15_NA	CROCC	chr1	17233200	17238200	14_ReprPCWk	CROCC
chr1	17287200	17287800	2_TssFlnk	CROCC	chr1	17287400	17287800	4_TssFlnkD	CROCC
chr1	17292400	17293600	6_TxWk	CROCC	chr1	17292400	17293600	5_Tx	CROCC
chr1	17377000	17379000	6_TxWk	SDHB	chr1	17377400	17379000	5_Tx	SDHB
chr1	17380000	17380665	1_TssA	SDHB	chr1	17380200	17380665	2_TssFlnk	SDHB
chr1	17393256	17393600	6_TxWk	PADI2	chr1	17393256	17393800	14_ReprPCWk	PADI2
chr1	17531621	17535600	15_NA	PADI1	chr1	17532800	17537200	14_ReprPCWk	PADI1
chr1	17536600	17539000	11_EnhWk	PADI1	chr1	17537400	17539200	6_TxWk	PADI1
chr1	17553200	17555800	15_NA	PADI1	chr1	17551800	17555400	14_ReprPCWk	PADI1
chr1	17556200	17558600	6_TxWk	PADI1	chr1	17556000	17559000	14_ReprPCWk	PADI1
chr1	17559400	17561200	9_EnhA1	PADI1	chr1	17559000	17561200	11_EnhWk	PADI1
chr1	17561200	17563400	10_EnhA2	PADI1	chr1	17561200	17564200	15_NA	PADI1
chr1	17575593	17578200	15_NA	PADI3	chr1	17575593	17577200	13_ReprPC	PADI3
chr1	17578400	17583600	14_ReprPCWk	PADI3	chr1	17579200	17585600	13_ReprPC	PADI3
chr1	17897200	17902200	6_TxWk	ARHGEF10L	chr1	17897000	17903600	14_ReprPCWk	ARHGEF10L
chr1	17943800	17944400	9_EnhA1	ARHGEF10L	chr1	17944000	17944400	11_EnhWk	ARHGEF10L
chr1	17945400	17945800	3_TssFlnkU	ARHGEF10L	chr1	17945400	17945800	4_TssFlnkD	ARHGEF10L
chr1	17974600	17974800	11_EnhWk	ARHGEF10L	chr1	17974600	17974800	5_Tx	ARHGEF10L
chr1	17974800	17976400	9_EnhA1	ARHGEF10L	chr1	17974800	17976400	7_EnhG1	ARHGEF10L
chr1	18081808	18083800	15_NA	ACTL8	chr1	18081808	18083600	14_ReprPCWk	ACTL8
chr1	18083800	18084800	10_EnhA2	ACTL8	chr1	18083600	18084400	11_EnhWk	ACTL8
chr1	18084800	18092200	15_NA	ACTL8	chr1	18084400	18091400	6_TxWk	ACTL8
chr1	18107000	18109200	13_ReprPC	ACTL8	chr1	18106800	18109000	14_ReprPCWk	ACTL8
chr1	18152600	18153558	14_ReprPCWk	ACTL8	chr1	18152800	18153558	13_ReprPC	ACTL8
chr1	18994200	18995000	12_TssBiv	PAX7	chr1	18994200	18995000	11_EnhWk	PAX7
chr1	19019400	19020800	9_EnhA1	PAX7	chr1	19019200	19021000	11_EnhWk	PAX7
chr1	19196600	19199000	6_TxWk	RP13-279N23.2	chr1	19196000	19198200	14_ReprPCWk	RP13-279N23.2
chr1	19248400	19251200	9_EnhA1	IFFO2	chr1	19249400	19251200	11_EnhWk	IFFO2
chr1	19280800	19282200	1_TssA	IFFO2	chr1	19280200	19282400	4_TssFlnkD	IFFO2
chr1	19529400	19531200	6_TxWk	UBR4	chr1	19529400	19530600	7_EnhG1	UBR4
chr1	19534400	19535000	10_EnhA2	UBR4	chr1	19534400	19535000	11_EnhWk	UBR4
chr1	19579000	19579400	2_TssFlnk	MRTO4	chr1	19578800	19579400	4_TssFlnkD	MRTO4
chr1	19615000	19615744	2_TssFlnk	AKR7A3	chr1	19615000	19615744	4_TssFlnkD	AKR7A3
chr1	19637600	19638640	2_TssFlnk	AKR7A2	chr1	19638000	19638640	1_TssA	AKR7A2
chr1	19638820	19639600	1_TssA	PQLC2	chr1	19639000	19639600	3_TssFlnkU	PQLC2
chr1	19639600	19639800	2_TssFlnk	PQLC2	chr1	19639600	19639800	4_TssFlnkD	PQLC2
chr1	19640000	19641000	6_TxWk	PQLC2	chr1	19639800	19640800	11_EnhWk	PQLC2
chr1	19641000	19641800	11_EnhWk	PQLC2	chr1	19640800	19641600	6_TxWk	PQLC2
chr1	19684400	19685400	7_EnhG1	CAPZB	chr1	19684200	19685400	6_TxWk	CAPZB
chr1	19712200	19713200	11_EnhWk	CAPZB	chr1	19712200	19713200	9_EnhA1	CAPZB
chr1	19717200	19718400	9_EnhA1	CAPZB	chr1	19717000	19718200	11_EnhWk	CAPZB
chr1	19724400	19728800	9_EnhA1	CAPZB	chr1	19724400	19729000	11_EnhWk	CAPZB
chr1	19741800	19742400	6_TxWk	CAPZB	chr1	19741800	19742600	7_EnhG1	CAPZB
chr1	19760600	19761400	10_EnhA2	CAPZB	chr1	19760400	19761400	9_EnhA1	CAPZB
chr1	19765400	19767600	6_TxWk	CAPZB	chr1	19765000	19767400	7_EnhG1	CAPZB
chr1	19772800	19773000	11_EnhWk	CAPZB	chr1	19772800	19773000	9_EnhA1	CAPZB
chr1	19773000	19774200	6_TxWk	CAPZB	chr1	19773000	19773800	11_EnhWk	CAPZB
chr1	19774600	19776000	9_EnhA1	CAPZB	chr1	19774800	19775800	11_EnhWk	CAPZB
chr1	19788000	19789600	6_TxWk	CAPZB	chr1	19788600	19790200	11_EnhWk	CAPZB
chr1	19790200	19794800	6_TxWk	CAPZB	chr1	19791600	19795200	11_EnhWk	CAPZB
chr1	19809400	19809800	6_TxWk	CAPZB	chr1	19809400	19810000	4_TssFlnkD	CAPZB
chr1	19966800	19967600	11_EnhWk	MINOS1-NBL1	chr1	19966800	19967400	10_EnhA2	MINOS1-NBL1
chr1	19967048	19967600	11_EnhWk	NBL1	chr1	19967048	19967400	10_EnhA2	NBL1
chr1	20003200	20006055	14_ReprPCWk	HTR6	chr1	20004000	20006055	13_ReprPC	HTR6
chr1	20060600	20062800	10_EnhA2	TMCO4	chr1	20060800	20063200	11_EnhWk	TMCO4
chr1	20062800	20070600	6_TxWk	TMCO4	chr1	20064400	20070000	14_ReprPCWk	TMCO4
chr1	20086600	20092000	6_TxWk	TMCO4	chr1	20085600	20091600	15_NA	TMCO4
chr1	20125800	20126438	2_TssFlnk	TMCO4	chr1	20125800	20126200	4_TssFlnkD	TMCO4
chr1	20238200	20238800	11_EnhWk	OTUD3	chr1	20238200	20238800	7_EnhG1	OTUD3
chr1	20246502	20248800	14_ReprPCWk	PLA2G2E	chr1	20247200	20249800	13_ReprPC	PLA2G2E
chr1	20384600	20385200	9_EnhA1	PLA2G5	chr1	20384400	20385200	11_EnhWk	PLA2G5
chr1	20386000	20390200	6_TxWk	PLA2G5	chr1	20385200	20389600	14_ReprPCWk	PLA2G5
chr1	20390600	20397600	14_ReprPCWk	PLA2G5	chr1	20389600	20401200	15_NA	PLA2G5
chr1	20497200	20501000	14_ReprPCWk	PLA2G2C	chr1	20498600	20501800	13_ReprPC	PLA2G2C
chr1	20808884	20809600	9_EnhA1	CAMK2N1	chr1	20808884	20809400	11_EnhWk	CAMK2N1
chr1	20917400	20926600	15_NA	CDA	chr1	20917800	20925800	14_ReprPCWk	CDA
chr1	20935400	20936400	9_EnhA1	CDA	chr1	20935400	20936400	11_EnhWk	CDA
chr1	20941000	20943000	10_EnhA2	CDA	chr1	20941200	20942800	6_TxWk	CDA
chr1	20990507	20996800	15_NA	KIF17	chr1	20990507	20996400	6_TxWk	KIF17
chr1	21021000	21022800	14_ReprPCWk	KIF17	chr1	21020600	21022400	13_ReprPC	KIF17
chr1	21111400	21112200	2_TssFlnk	HP1BP3	chr1	21111400	21112000	4_TssFlnkD	HP1BP3
chr1	21144400	21145400	5_Tx	EIF4G3	chr1	21144400	21145400	7_EnhG1	EIF4G3
chr1	21145400	21149800	6_TxWk	EIF4G3	chr1	21145400	21149000	5_Tx	EIF4G3
chr1	21270600	21273600	5_Tx	EIF4G3	chr1	21271600	21274400	6_TxWk	EIF4G3
chr1	21417400	21418800	10_EnhA2	EIF4G3	chr1	21417000	21418400	9_EnhA1	EIF4G3
chr1	21560800	21561200	7_EnhG1	ECE1	chr1	21560800	21561200	6_TxWk	ECE1
chr1	21578000	21579400	7_EnhG1	ECE1	chr1	21578200	21579200	11_EnhWk	ECE1
chr1	21580600	21581600	9_EnhA1	ECE1	chr1	21580400	21581200	11_EnhWk	ECE1
chr1	21632800	21636000	6_TxWk	ECE1	chr1	21633800	21637000	11_EnhWk	ECE1
chr1	21637200	21637800	9_EnhA1	ECE1	chr1	21637200	21638000	11_EnhWk	ECE1
chr1	21808400	21809200	5_Tx	NBPF3	chr1	21808200	21809400	13_ReprPC	NBPF3
chr1	21835858	21836400	2_TssFlnk	ALPL	chr1	21836000	21836600	12_TssBiv	ALPL
chr1	21878600	21879000	10_EnhA2	ALPL	chr1	21878400	21879000	11_EnhWk	ALPL
chr1	21880400	21880600	9_EnhA1	ALPL	chr1	21880400	21880600	2_TssFlnk	ALPL
chr1	22028400	22029200	5_Tx	USP48	chr1	22028400	22029600	6_TxWk	USP48
chr1	22142200	22142400	10_EnhA2	LDLRAD2	chr1	22142200	22142400	11_EnhWk	LDLRAD2
chr1	22261000	22263790	1_TssA	HSPG2	chr1	22260000	22263400	3_TssFlnkU	HSPG2
chr1	22380600	22381200	2_TssFlnk	CDC42	chr1	22380400	22381000	4_TssFlnkD	CDC42
chr1	22381400	22383400	6_TxWk	CDC42	chr1	22381000	22383200	11_EnhWk	CDC42
chr1	22383400	22386200	5_Tx	CDC42	chr1	22383400	22385200	7_EnhG1	CDC42
chr1	22404000	22405400	10_EnhA2	CDC42	chr1	22404200	22405800	7_EnhG1	CDC42
chr1	22415600	22418200	6_TxWk	CDC42	chr1	22416200	22418400	5_Tx	CDC42
chr1	22418200	22419437	5_Tx	CDC42	chr1	22418400	22419400	7_EnhG1	CDC42
chr1	22468600	22470200	2_TssFlnk	WNT4	chr1	22468200	22470400	12_TssBiv	WNT4
chr1	22779200	22779600	3_TssFlnkU	ZBTB40	chr1	22779200	22779600	4_TssFlnkD	ZBTB40
chr1	22779600	22779800	10_EnhA2	ZBTB40	chr1	22779600	22779800	11_EnhWk	ZBTB40
chr1	22816600	22817800	5_Tx	ZBTB40	chr1	22816600	22817600	11_EnhWk	ZBTB40
chr1	22830000	22831400	9_EnhA1	ZBTB40	chr1	22830200	22831400	11_EnhWk	ZBTB40
chr1	23037332	23038000	2_TssFlnk	EPHB2	chr1	23037332	23038400	12_TssBiv	EPHB2
chr1	23040800	23050800	14_ReprPCWk	EPHB2	chr1	23038400	23052800	13_ReprPC	EPHB2
chr1	23054200	23066000	15_NA	EPHB2	chr1	23056200	23065200	14_ReprPCWk	EPHB2
chr1	23073200	23074400	9_EnhA1	EPHB2	chr1	23073400	23074400	11_EnhWk	EPHB2
chr1	23094000	23098000	14_ReprPCWk	EPHB2	chr1	23092800	23096400	13_ReprPC	EPHB2
chr1	23126000	23129600	14_ReprPCWk	EPHB2	chr1	23124000	23129800	13_ReprPC	EPHB2
chr1	23129600	23131200	11_EnhWk	EPHB2	chr1	23129800	23131800	14_ReprPCWk	EPHB2
chr1	23158400	23159200	9_EnhA1	EPHB2	chr1	23158200	23159000	11_EnhWk	EPHB2
chr1	23159600	23161400	15_NA	EPHB2	chr1	23159000	23162000	14_ReprPCWk	EPHB2
chr1	23188600	23194200	15_NA	EPHB2	chr1	23190200	23193800	13_ReprPC	EPHB2
chr1	23204000	23212800	14_ReprPCWk	EPHB2	chr1	23207400	23214800	13_ReprPC	EPHB2
chr1	23215800	23216000	11_EnhWk	EPHB2	chr1	23215800	23216000	14_ReprPCWk	EPHB2
chr1	23230000	23237400	6_TxWk	EPHB2	chr1	23228000	23236800	14_ReprPCWk	EPHB2
chr1	23338400	23342343	15_NA	TEX46	chr1	23337327	23341200	14_ReprPCWk	TEX46
chr1	23493400	23493600	2_TssFlnk	LUZP1	chr1	23493400	23493600	4_TssFlnkD	LUZP1
chr1	23496000	23496800	9_EnhA1	LUZP1	chr1	23496200	23496800	10_EnhA2	LUZP1
chr1	23498600	23503600	14_ReprPCWk	LUZP1	chr1	23496800	23503800	15_NA	LUZP1
chr1	23503800	23504301	1_TssA	LUZP1	chr1	23504000	23504301	4_TssFlnkD	LUZP1
chr1	23516993	23517000	10_EnhA2	HTR1D	chr1	23516993	23517000	13_ReprPC	HTR1D
chr1	23517000	23519800	6_TxWk	HTR1D	chr1	23517000	23520200	14_ReprPCWk	HTR1D
chr1	23655800	23656400	6_TxWk	HNRNPR	chr1	23655800	23656600	7_EnhG1	HNRNPR
chr1	23667800	23668400	2_TssFlnk	HNRNPR	chr1	23667600	23668400	4_TssFlnkD	HNRNPR
chr1	23714600	23719600	6_TxWk	TCEA3	chr1	23715400	23719600	14_ReprPCWk	TCEA3
chr1	23748200	23749800	9_EnhA1	TCEA3	chr1	23747800	23750000	11_EnhWk	TCEA3
chr1	23750800	23751233	1_TssA	TCEA3	chr1	23750800	23751233	4_TssFlnkD	TCEA3
chr1	23856000	23857000	6_TxWk	E2F2	chr1	23855600	23856600	11_EnhWk	E2F2
chr1	23884600	23886200	1_TssA	ID3	chr1	23884409	23886000	4_TssFlnkD	ID3
chr1	23886200	23886285	3_TssFlnkU	ID3	chr1	23886200	23886285	1_TssA	ID3
chr1	23946000	23946400	2_TssFlnk	MDS2	chr1	23946000	23946600	12_TssBiv	MDS2
chr1	23962200	23965400	15_NA	MDS2	chr1	23962200	23964200	6_TxWk	MDS2
chr1	24021000	24022915	5_Tx	RPL11	chr1	24020400	24022915	7_EnhG1	RPL11
chr1	24085200	24088200	7_EnhG1	ELOA	chr1	24086000	24088549	5_Tx	ELOA
chr1	24104895	24105600	1_TssA	PITHD1	chr1	24104895	24105400	2_TssFlnk	PITHD1
chr1	24108000	24114000	5_Tx	PITHD1	chr1	24107200	24112200	6_TxWk	PITHD1
chr1	24117460	24117600	1_TssA	LYPLA2	chr1	24117460	24117600	4_TssFlnkD	LYPLA2
chr1	24126000	24126600	3_TssFlnkU	GALE	chr1	24126000	24126600	4_TssFlnkD	GALE
chr1	24174800	24184000	6_TxWk	FUCA1	chr1	24175600	24182400	14_ReprPCWk	FUCA1
chr1	24201600	24202200	10_EnhA2	CNR2	chr1	24201600	24202600	14_ReprPCWk	CNR2
chr1	24247400	24250200	6_TxWk	CNR2	chr1	24247200	24250400	14_ReprPCWk	CNR2
chr1	24257600	24258400	9_EnhA1	CNR2	chr1	24257200	24258200	11_EnhWk	CNR2
chr1	24284800	24285000	10_EnhA2	CNR2	chr1	24284800	24285000	11_EnhWk	CNR2
chr1	24285000	24285549	1_TssA	CNR2	chr1	24285000	24285549	3_TssFlnkU	CNR2
chr1	24288400	24289952	5_Tx	PNRC2	chr1	24288600	24289952	7_EnhG1	PNRC2
chr1	24303600	24304600	7_EnhG1	SRSF10	chr1	24303400	24304800	11_EnhWk	SRSF10
chr1	24307400	24307417	10_EnhA2	SRSF10	chr1	24307400	24307417	9_EnhA1	SRSF10
chr1	24398800	24422000	5_Tx	MYOM3	chr1	24400400	24419400	13_ReprPC	MYOM3
chr1	24423800	24426600	5_Tx	MYOM3	chr1	24423800	24426200	13_ReprPC	MYOM3
chr1	24446600	24447000	11_EnhWk	IL22RA1	chr1	24446400	24447000	12_TssBiv	IL22RA1
chr1	24459600	24468600	14_ReprPCWk	IL22RA1	chr1	24462000	24469400	13_ReprPC	IL22RA1
chr1	24706600	24711200	14_ReprPCWk	STPG1	chr1	24708000	24710800	6_TxWk	STPG1
chr1	24718000	24719000	9_EnhA1	STPG1	chr1	24718200	24719000	11_EnhWk	STPG1
chr1	24721000	24739600	6_TxWk	STPG1	chr1	24720800	24739400	15_NA	STPG1
chr1	24743000	24743424	9_EnhA1	STPG1	chr1	24743000	24743424	11_EnhWk	STPG1
chr1	24743000	24744200	9_EnhA1	NIPAL3	chr1	24743000	24744200	11_EnhWk	NIPAL3
chr1	24749800	24764000	15_NA	NIPAL3	chr1	24744200	24764400	6_TxWk	NIPAL3
chr1	24764200	24765200	6_TxWk	NIPAL3	chr1	24764400	24765600	11_EnhWk	NIPAL3
chr1	25076600	25078000	6_TxWk	CLIC4	chr1	25076600	25078000	7_EnhG1	CLIC4
chr1	25078600	25078800	2_TssFlnk	CLIC4	chr1	25078600	25078800	4_TssFlnkD	CLIC4
chr1	25098400	25100400	6_TxWk	CLIC4	chr1	25098200	25101200	7_EnhG1	CLIC4
chr1	25116000	25119200	6_TxWk	CLIC4	chr1	25114800	25118200	7_EnhG1	CLIC4
chr1	25133600	25136000	6_TxWk	CLIC4	chr1	25133600	25135800	5_Tx	CLIC4
chr1	25232400	25238800	15_NA	RUNX3	chr1	25233200	25240000	14_ReprPCWk	RUNX3
chr1	25568728	25572000	5_Tx	RSRP1	chr1	25568728	25571800	7_EnhG1	RSRP1
chr1	25575000	25582600	6_TxWk	RSRP1	chr1	25575000	25580000	15_NA	RSRP1
chr1	25582600	25584400	10_EnhA2	RSRP1	chr1	25582800	25584400	11_EnhWk	RSRP1
chr1	25670600	25671600	10_EnhA2	TMEM50A	chr1	25670400	25671200	11_EnhWk	TMEM50A
chr1	25675400	25678200	5_Tx	TMEM50A	chr1	25676000	25678600	6_TxWk	TMEM50A
chr1	25682600	25684000	7_EnhG1	TMEM50A	chr1	25682800	25683800	11_EnhWk	TMEM50A
chr1	25698000	25698600	9_EnhA1	RHCE	chr1	25697600	25698600	11_EnhWk	RHCE
chr1	25730600	25737800	15_NA	RHCE	chr1	25729200	25737200	14_ReprPCWk	RHCE
chr1	25749000	25755800	15_NA	RHCE	chr1	25751000	25755200	14_ReprPCWk	RHCE
chr1	25756000	25756200	2_TssFlnk	RHCE	chr1	25756000	25756200	11_EnhWk	RHCE
chr1	25794200	25795200	10_EnhA2	MACO1	chr1	25794200	25795400	11_EnhWk	MACO1
chr1	25810200	25813800	5_Tx	MACO1	chr1	25811000	25814600	6_TxWk	MACO1
chr1	25870200	25871600	1_TssA	LDLRAP1	chr1	25870400	25871600	4_TssFlnkD	LDLRAP1
chr1	25875600	25876600	9_EnhA1	LDLRAP1	chr1	25875200	25876200	11_EnhWk	LDLRAP1
chr1	25885800	25892000	5_Tx	LDLRAP1	chr1	25883600	25890600	6_TxWk	LDLRAP1
chr1	25893200	25895377	9_EnhA1	LDLRAP1	chr1	25892400	25894800	11_EnhWk	LDLRAP1
chr1	26144200	26144713	6_TxWk	SELENON	chr1	26144000	26144713	11_EnhWk	SELENON
chr1	26144200	26144800	6_TxWk	SELENON	chr1	26144000	26144713	11_EnhWk	SELENON
chr1	26185400	26185903	2_TssFlnk	AUNIP	chr1	26185400	26185800	4_TssFlnkD	AUNIP
chr1	26220400	26220800	10_EnhA2	STMN1	chr1	26220400	26221000	6_TxWk	STMN1
chr1	26304200	26305400	9_EnhA1	PAFAH2	chr1	26304000	26305000	7_EnhG1	PAFAH2
chr1	26324600	26324648	10_EnhA2	PAFAH2	chr1	26324600	26324648	11_EnhWk	PAFAH2
chr1	26346375	26347600	9_EnhA1	EXTL1	chr1	26346375	26347800	11_EnhWk	EXTL1
chr1	26350400	26351000	4_TssFlnkD	EXTL1	chr1	26350000	26351000	14_ReprPCWk	EXTL1
chr1	26387400	26388000	7_EnhG1	TRIM63	chr1	26387200	26388000	12_TssBiv	TRIM63
chr1	26394600	26394800	14_ReprPCWk	TRIM63	chr1	26394600	26394927	13_ReprPC	TRIM63
chr1	26437664	26438400	2_TssFlnk	PDIK1L	chr1	26437664	26438800	1_TssA	PDIK1L
chr1	26438600	26439200	2_TssFlnk	PDIK1L	chr1	26438800	26439200	4_TssFlnkD	PDIK1L
chr1	26441200	26446800	5_Tx	PDIK1L	chr1	26439600	26445400	6_TxWk	PDIK1L
chr1	26497600	26498551	6_TxWk	ZNF593	chr1	26497400	26498551	11_EnhWk	ZNF593
chr1	26562000	26566000	6_TxWk	CEP85	chr1	26562000	26564600	11_EnhWk	CEP85
chr1	26607819	26608600	8_EnhG2	UBXN11	chr1	26607819	26608400	4_TssFlnkD	UBXN11
chr1	26608600	26609800	7_EnhG1	UBXN11	chr1	26608400	26609800	11_EnhWk	UBXN11
chr1	26699800	26700800	11_EnhWk	ZNF683	chr1	26699600	26700800	12_TssBiv	ZNF683
chr1	26700800	26701013	6_TxWk	ZNF683	chr1	26700800	26701013	13_ReprPC	ZNF683
chr1	27035600	27038800	5_Tx	ARID1A	chr1	27036000	27038000	6_TxWk	ARID1A
chr1	27048200	27049000	10_EnhA2	ARID1A	chr1	27048200	27049200	9_EnhA1	ARID1A
chr1	27190800	27190947	3_TssFlnkU	SFN	chr1	27190800	27190947	11_EnhWk	SFN
chr1	27226200	27226400	2_TssFlnk	GPATCH3	chr1	27226200	27226400	3_TssFlnkU	GPATCH3
chr1	27227200	27227400	4_TssFlnkD	NUDC	chr1	27227200	27227400	1_TssA	NUDC
chr1	27247600	27247800	10_EnhA2	NUDC	chr1	27247600	27247800	11_EnhWk	NUDC
chr1	27249600	27250200	6_TxWk	NUDC	chr1	27249600	27250000	11_EnhWk	NUDC
chr1	27266200	27266400	10_EnhA2	NUDC	chr1	27266200	27266400	7_EnhG1	NUDC
chr1	27276053	27279600	6_TxWk	KDF1	chr1	27276800	27281000	14_ReprPCWk	KDF1
chr1	27326800	27327389	6_TxWk	TRNP1	chr1	27326800	27327389	11_EnhWk	TRNP1
chr1	27339000	27339327	2_TssFlnk	TENT5B	chr1	27339000	27339200	4_TssFlnkD	TENT5B
chr1	27449000	27449600	9_EnhA1	SLC9A1	chr1	27448800	27449400	11_EnhWk	SLC9A1
chr1	27653200	27654200	7_EnhG1	TMEM222	chr1	27653600	27654400	11_EnhWk	TMEM222
chr1	27676600	27678000	13_ReprPC	SYTL1	chr1	27676000	27677600	12_TssBiv	SYTL1
chr1	27760000	27760200	9_EnhA1	WASF2	chr1	27760000	27760200	6_TxWk	WASF2
chr1	27803200	27808200	5_Tx	WASF2	chr1	27804000	27808200	6_TxWk	WASF2
chr1	27808200	27809400	6_TxWk	WASF2	chr1	27808200	27809400	11_EnhWk	WASF2
chr1	27812400	27814200	6_TxWk	WASF2	chr1	27812800	27814200	11_EnhWk	WASF2
chr1	27866600	27870200	9_EnhA1	AHDC1	chr1	27866000	27870600	7_EnhG1	AHDC1
chr1	27898600	27899600	9_EnhA1	AHDC1	chr1	27899000	27899600	11_EnhWk	AHDC1
chr1	27899600	27901800	7_EnhG1	AHDC1	chr1	27899800	27901800	11_EnhWk	AHDC1
chr1	27901800	27902000	3_TssFlnkU	AHDC1	chr1	27901800	27902000	9_EnhA1	AHDC1
chr1	27902000	27902600	1_TssA	AHDC1	chr1	27902000	27902800	3_TssFlnkU	AHDC1
chr1	27902800	27903800	9_EnhA1	AHDC1	chr1	27902800	27904200	11_EnhWk	AHDC1
chr1	27908400	27910400	6_TxWk	AHDC1	chr1	27908400	27909800	7_EnhG1	AHDC1
chr1	27915200	27918600	7_EnhG1	AHDC1	chr1	27915000	27919600	11_EnhWk	AHDC1
chr1	27920000	27920200	3_TssFlnkU	AHDC1	chr1	27920000	27920200	9_EnhA1	AHDC1
chr1	27942400	27948200	15_NA	FGR	chr1	27944600	27949600	14_ReprPCWk	FGR
chr1	27948600	27957800	15_NA	FGR	chr1	27950800	27957600	14_ReprPCWk	FGR
chr1	28053400	28053800	3_TssFlnkU	FAM76A	chr1	28053200	28053800	4_TssFlnkD	FAM76A
chr1	28099694	28101000	1_TssA	STX12	chr1	28100200	28101000	3_TssFlnkU	STX12
chr1	28200000	28202000	10_EnhA2	THEMIS2	chr1	28200000	28202000	11_EnhWk	THEMIS2
chr1	28206400	28213196	5_Tx	THEMIS2	chr1	28206400	28212200	6_TxWk	THEMIS2
chr1	28234000	28234200	10_EnhA2	RPA2	chr1	28234000	28234200	6_TxWk	RPA2
chr1	28298400	28300200	11_EnhWk	EYA3	chr1	28299000	28300400	5_Tx	EYA3
chr1	28306000	28307200	11_EnhWk	EYA3	chr1	28306400	28307400	10_EnhA2	EYA3
chr1	28341400	28344000	5_Tx	EYA3	chr1	28340600	28343200	6_TxWk	EYA3
chr1	28355200	28355600	11_EnhWk	EYA3	chr1	28355200	28355800	10_EnhA2	EYA3
chr1	28413400	28414000	6_TxWk	EYA3	chr1	28413400	28414000	11_EnhWk	EYA3
chr1	28479600	28480000	10_EnhA2	PTAFR	chr1	28479600	28480000	11_EnhWk	PTAFR
chr1	28480000	28487000	14_ReprPCWk	PTAFR	chr1	28480000	28487400	15_NA	PTAFR
chr1	28490600	28495600	14_ReprPCWk	PTAFR	chr1	28490600	28498800	15_NA	PTAFR
chr1	28498800	28500000	10_EnhA2	PTAFR	chr1	28499000	28500400	6_TxWk	PTAFR
chr1	28501200	28502400	6_TxWk	PTAFR	chr1	28500800	28502400	14_ReprPCWk	PTAFR
chr1	28563800	28564000	2_TssFlnk	ATP5IF1	chr1	28563800	28564000	11_EnhWk	ATP5IF1
chr1	28657200	28658200	6_TxWk	MED18	chr1	28656800	28658200	7_EnhG1	MED18
chr1	28764600	28765000	3_TssFlnkU	PHACTR4	chr1	28764600	28765200	1_TssA	PHACTR4
chr1	28765200	28766600	2_TssFlnk	PHACTR4	chr1	28765200	28766400	4_TssFlnkD	PHACTR4
chr1	28837600	28837800	5_Tx	RCC1	chr1	28837600	28837800	9_EnhA1	RCC1
chr1	28844400	28845000	1_TssA	RCC1	chr1	28844400	28844800	2_TssFlnk	RCC1
chr1	28846000	28846800	6_TxWk	RCC1	chr1	28845800	28847000	11_EnhWk	RCC1
chr1	28865600	28865812	10_EnhA2	RCC1	chr1	28865600	28865812	11_EnhWk	RCC1
chr1	28880400	28880600	2_TssFlnk	TRNAU1AP	chr1	28880400	28880600	4_TssFlnkD	TRNAU1AP
chr1	29086200	29087600	6_TxWk	YTHDF2	chr1	29086200	29088000	7_EnhG1	YTHDF2
chr1	29138654	29139400	13_ReprPC	OPRD1	chr1	29138654	29139400	12_TssBiv	OPRD1
chr1	29488800	29490000	10_EnhA2	SRSF4	chr1	29488600	29489800	11_EnhWk	SRSF4
chr1	29499000	29502000	5_Tx	SRSF4	chr1	29498600	29502600	6_TxWk	SRSF4
chr1	29522600	29524000	7_EnhG1	MECR	chr1	29522400	29523800	11_EnhWk	MECR
chr1	29565200	29566000	9_EnhA1	PTPRU	chr1	29565200	29566000	11_EnhWk	PTPRU
chr1	29583800	29586000	6_TxWk	PTPRU	chr1	29584600	29586200	14_ReprPCWk	PTPRU
chr1	29597800	29599000	9_EnhA1	PTPRU	chr1	29597600	29599000	11_EnhWk	PTPRU
chr1	31190600	31191600	2_TssFlnk	MATN1	chr1	31191000	31191600	11_EnhWk	MATN1
chr1	31191600	31192200	1_TssA	MATN1	chr1	31191600	31192200	3_TssFlnkU	MATN1
chr1	31192200	31192400	10_EnhA2	MATN1	chr1	31192200	31192400	11_EnhWk	MATN1
chr1	31205316	31205400	10_EnhA2	LAPTM5	chr1	31205316	31205400	14_ReprPCWk	LAPTM5
chr1	31212000	31221000	6_TxWk	LAPTM5	chr1	31207400	31221000	13_ReprPC	LAPTM5
chr1	31351200	31356600	6_TxWk	SDC3	chr1	31352200	31355600	14_ReprPCWk	SDC3
chr1	31356600	31359000	10_EnhA2	SDC3	chr1	31357000	31359000	14_ReprPCWk	SDC3
chr1	31453600	31453800	10_EnhA2	PUM1	chr1	31453600	31453800	6_TxWk	PUM1
chr1	31453800	31454800	9_EnhA1	PUM1	chr1	31453800	31454400	7_EnhG1	PUM1
chr1	31479800	31480800	11_EnhWk	PUM1	chr1	31480200	31480800	9_EnhA1	PUM1
chr1	31523800	31527600	6_TxWk	PUM1	chr1	31523200	31527800	7_EnhG1	PUM1
chr1	31532800	31535800	6_TxWk	PUM1	chr1	31532400	31534800	7_EnhG1	PUM1
chr1	31535800	31536400	2_TssFlnk	PUM1	chr1	31535800	31536800	4_TssFlnkD	PUM1
chr1	31711800	31712401	2_TssFlnk	NKAIN1	chr1	31712000	31712401	12_TssBiv	NKAIN1
chr1	31821000	31821800	9_EnhA1	ZCCHC17	chr1	31820800	31821600	7_EnhG1	ZCCHC17
chr1	31882412	31883000	9_EnhA1	SERINC2	chr1	31882412	31883000	14_ReprPCWk	SERINC2
chr1	31884400	31885000	11_EnhWk	SERINC2	chr1	31884200	31885000	14_ReprPCWk	SERINC2
chr1	31885000	31885200	4_TssFlnkD	SERINC2	chr1	31885000	31885200	13_ReprPC	SERINC2
chr1	31887800	31889000	9_EnhA1	SERINC2	chr1	31887800	31888800	6_TxWk	SERINC2
chr1	31889000	31891600	10_EnhA2	SERINC2	chr1	31889800	31891600	11_EnhWk	SERINC2
chr1	31893600	31895800	9_EnhA1	SERINC2	chr1	31894400	31895800	11_EnhWk	SERINC2
chr1	31904600	31904800	4_TssFlnkD	SERINC2	chr1	31904600	31904800	2_TssFlnk	SERINC2
chr1	32050400	32053288	15_NA	TINAGL1	chr1	32050400	32053288	14_ReprPCWk	TINAGL1
chr1	32091600	32094600	9_EnhA1	HCRTR1	chr1	32091600	32095000	11_EnhWk	HCRTR1
chr1	32127600	32129000	11_EnhWk	COL16A1	chr1	32127800	32129200	6_TxWk	COL16A1
chr1	32129000	32131200	6_TxWk	COL16A1	chr1	32129200	32131200	5_Tx	COL16A1
chr1	32133600	32135200	11_EnhWk	COL16A1	chr1	32134200	32135200	6_TxWk	COL16A1
chr1	32135400	32136400	3_TssFlnkU	COL16A1	chr1	32135800	32136800	11_EnhWk	COL16A1
chr1	32143200	32144200	5_Tx	COL16A1	chr1	32143000	32144400	6_TxWk	COL16A1
chr1	32155000	32156000	9_EnhA1	COL16A1	chr1	32155000	32156600	7_EnhG1	COL16A1
chr1	32163000	32165600	6_TxWk	COL16A1	chr1	32162200	32165000	5_Tx	COL16A1
chr1	32168000	32169000	10_EnhA2	COL16A1	chr1	32168000	32168800	11_EnhWk	COL16A1
chr1	32169000	32169400	3_TssFlnkU	COL16A1	chr1	32169000	32169400	11_EnhWk	COL16A1
chr1	32169400	32169800	1_TssA	COL16A1	chr1	32169400	32169800	4_TssFlnkD	COL16A1
chr1	32169800	32169920	10_EnhA2	COL16A1	chr1	32169800	32169920	11_EnhWk	COL16A1
chr1	32192718	32193800	5_Tx	ADGRB2	chr1	32192718	32193400	14_ReprPCWk	ADGRB2
chr1	32198400	32199800	6_TxWk	ADGRB2	chr1	32198800	32200200	13_ReprPC	ADGRB2
chr1	32200400	32201600	6_TxWk	ADGRB2	chr1	32200200	32201400	14_ReprPCWk	ADGRB2
chr1	32201600	32202000	11_EnhWk	ADGRB2	chr1	32201400	32202000	13_ReprPC	ADGRB2
chr1	32211800	32216000	6_TxWk	ADGRB2	chr1	32212600	32216000	13_ReprPC	ADGRB2
chr1	32221600	32225600	6_TxWk	ADGRB2	chr1	32222400	32226000	14_ReprPCWk	ADGRB2
chr1	32226000	32226800	1_TssA	ADGRB2	chr1	32226200	32226800	4_TssFlnkD	ADGRB2
chr1	32268200	32268800	10_EnhA2	SPOCD1	chr1	32268200	32268600	2_TssFlnk	SPOCD1
chr1	32388600	32396600	6_TxWk	PTP4A2	chr1	32389600	32397000	11_EnhWk	PTP4A2
chr1	32397400	32399400	10_EnhA2	PTP4A2	chr1	32398000	32399400	11_EnhWk	PTP4A2
chr1	32401200	32401400	4_TssFlnkD	PTP4A2	chr1	32401200	32401400	11_EnhWk	PTP4A2
chr1	32401400	32401600	2_TssFlnk	PTP4A2	chr1	32401400	32401600	9_EnhA1	PTP4A2
chr1	32405200	32408000	6_TxWk	PTP4A2	chr1	32404600	32407600	10_EnhA2	PTP4A2
chr1	32408000	32409000	10_EnhA2	PTP4A2	chr1	32407800	32409000	11_EnhWk	PTP4A2
chr1	32482600	32487600	6_TxWk	KHDRBS1	chr1	32484000	32487600	11_EnhWk	KHDRBS1
chr1	32495600	32497000	5_Tx	KHDRBS1	chr1	32495000	32497200	7_EnhG1	KHDRBS1
chr1	32537632	32537800	9_EnhA1	TMEM39B	chr1	32537632	32537800	11_EnhWk	TMEM39B
chr1	32575000	32575200	10_EnhA2	KPNA6	chr1	32575000	32575200	3_TssFlnkU	KPNA6
chr1	32596800	32598600	6_TxWk	KPNA6	chr1	32596400	32598000	5_Tx	KPNA6
chr1	32608800	32612800	6_TxWk	KPNA6	chr1	32607600	32611200	11_EnhWk	KPNA6
chr1	32646800	32647400	8_EnhG2	TXLNA	chr1	32646800	32647200	4_TssFlnkD	TXLNA
chr1	32647400	32648000	7_EnhG1	TXLNA	chr1	32647200	32648200	11_EnhWk	TXLNA
chr1	32667200	32667600	7_EnhG1	CCDC28B	chr1	32667200	32667600	11_EnhWk	CCDC28B
chr1	32667600	32668200	5_Tx	CCDC28B	chr1	32667600	32668000	6_TxWk	CCDC28B
chr1	32671236	32671600	2_TssFlnk	IQCC	chr1	32671236	32671800	4_TssFlnkD	IQCC
chr1	32713000	32714457	14_ReprPCWk	FAM167B	chr1	32712834	32714200	11_EnhWk	FAM167B
chr1	32750800	32751766	14_ReprPCWk	LCK	chr1	32750200	32751766	13_ReprPC	LCK
chr1	32799433	32800000	7_EnhG1	MARCKSL1	chr1	32799600	32800200	11_EnhWk	MARCKSL1
chr1	32800000	32800800	8_EnhG2	MARCKSL1	chr1	32800200	32800800	4_TssFlnkD	MARCKSL1
chr1	32817200	32818000	1_TssA	TSSK3	chr1	32817200	32818200	3_TssFlnkU	TSSK3
chr1	32959600	32962200	9_EnhA1	ZBTB8B	chr1	32959600	32962287	15_NA	ZBTB8B
chr1	32959600	32962200	9_EnhA1	ZBTB8B	chr1	32959600	32962287	15_NA	ZBTB8B
chr1	32982600	32986200	6_TxWk	RP1-27O5.3	chr1	32981600	32986200	14_ReprPCWk	RP1-27O5.3
chr1	32986200	32986800	2_TssFlnk	RP1-27O5.3	chr1	32986200	32986600	4_TssFlnkD	RP1-27O5.3
chr1	32987200	32993800	15_NA	RP1-27O5.3	chr1	32987000	32995200	14_ReprPCWk	RP1-27O5.3
chr1	33077800	33078400	2_TssFlnk	ZBTB8OS	chr1	33077400	33078400	4_TssFlnkD	ZBTB8OS
chr1	33103800	33105000	7_EnhG1	ZBTB8OS	chr1	33103600	33105600	6_TxWk	ZBTB8OS
chr1	33114800	33115600	2_TssFlnk	ZBTB8OS	chr1	33114800	33115600	4_TssFlnkD	ZBTB8OS
chr1	33117800	33118000	2_TssFlnk	RBBP4	chr1	33117800	33118000	8_EnhG2	RBBP4
chr1	33167200	33169000	1_TssA	SYNC	chr1	33166800	33169197	3_TssFlnkU	SYNC
chr1	33208600	33219000	6_TxWk	KIAA1522	chr1	33209600	33216400	14_ReprPCWk	KIAA1522
chr1	33361400	33366400	6_TxWk	TMEM54	chr1	33362000	33366200	14_ReprPCWk	TMEM54
chr1	33361400	33364042	6_TxWk	HPCA	chr1	33362000	33364042	14_ReprPCWk	HPCA
chr1	33366400	33367039	2_TssFlnk	TMEM54	chr1	33366200	33367039	12_TssBiv	TMEM54
chr1	33439268	33439642	6_TxWk	FKSG48	chr1	33439268	33439600	11_EnhWk	FKSG48
chr1	33494200	33496000	5_Tx	AK2	chr1	33494600	33496600	6_TxWk	AK2
chr1	33496000	33498400	7_EnhG1	AK2	chr1	33496600	33498800	11_EnhWk	AK2
chr1	33511800	33513400	10_EnhA2	AK2	chr1	33511800	33513400	6_TxWk	AK2
chr1	33528000	33529600	6_TxWk	AK2	chr1	33527600	33529400	14_ReprPCWk	AK2
chr1	33529800	33533400	6_TxWk	AK2	chr1	33529600	33532000	5_Tx	AK2
chr1	33533400	33534200	10_EnhA2	AK2	chr1	33533600	33534400	11_EnhWk	AK2
chr1	33548800	33549800	7_EnhG1	AZIN2	chr1	33549000	33549600	6_TxWk	AZIN2
chr1	33551000	33552000	7_EnhG1	AZIN2	chr1	33550800	33551800	6_TxWk	AZIN2
chr1	33554600	33556000	7_EnhG1	AZIN2	chr1	33554000	33555600	11_EnhWk	AZIN2
chr1	33556000	33560400	5_Tx	AZIN2	chr1	33555600	33559800	6_TxWk	AZIN2
chr1	33560400	33561400	7_EnhG1	AZIN2	chr1	33560400	33561000	6_TxWk	AZIN2
chr1	33566200	33567400	6_TxWk	AZIN2	chr1	33566000	33567800	7_EnhG1	AZIN2
chr1	33617000	33619600	7_EnhG1	TRIM62	chr1	33616200	33619200	11_EnhWk	TRIM62
chr1	33734400	33734800	9_EnhA1	ZNF362	chr1	33734400	33735000	11_EnhWk	ZNF362
chr1	33756800	33758800	6_TxWk	ZNF362	chr1	33757200	33758600	5_Tx	ZNF362
chr1	33772367	33773000	13_ReprPC	A3GALT2	chr1	33772367	33772800	12_TssBiv	A3GALT2
chr1	33815800	33816400	3_TssFlnkU	PHC2	chr1	33815800	33816600	4_TssFlnkD	PHC2
chr1	33829000	33831400	9_EnhA1	PHC2	chr1	33829000	33832400	11_EnhWk	PHC2
chr1	33833400	33835600	5_Tx	PHC2	chr1	33833600	33835800	6_TxWk	PHC2
chr1	33847600	33850800	9_EnhA1	PHC2	chr1	33848800	33851600	11_EnhWk	PHC2
chr1	33876000	33876400	3_TssFlnkU	PHC2	chr1	33876000	33876400	9_EnhA1	PHC2
chr1	33889800	33890600	9_EnhA1	PHC2	chr1	33889400	33890600	11_EnhWk	PHC2
chr1	34046800	34050600	14_ReprPCWk	CSMD2	chr1	34047600	34050600	13_ReprPC	CSMD2
chr1	34091800	34093400	9_EnhA1	CSMD2	chr1	34092200	34093200	11_EnhWk	CSMD2
chr1	34317200	34351200	15_NA	CSMD2	chr1	34329000	34353200	14_ReprPCWk	CSMD2
chr1	34431600	34437200	14_ReprPCWk	CSMD2	chr1	34430400	34435000	15_NA	CSMD2
chr1	35260200	35261348	6_TxWk	GJA4	chr1	35259800	35261348	14_ReprPCWk	GJA4
chr1	35331600	35332400	2_TssFlnk	DLGAP3	chr1	35331200	35332400	12_TssBiv	DLGAP3
chr1	35734568	35735000	1_TssA	ZMYM4	chr1	35734600	35735200	2_TssFlnk	ZMYM4
chr1	35912600	35913600	6_TxWk	KIAA0319L	chr1	35912200	35913200	5_Tx	KIAA0319L
chr1	35920200	35921400	6_TxWk	KIAA0319L	chr1	35920000	35921000	11_EnhWk	KIAA0319L
chr1	36005400	36006600	7_EnhG1	KIAA0319L	chr1	36005000	36006800	11_EnhWk	KIAA0319L
chr1	36019400	36020200	7_EnhG1	KIAA0319L	chr1	36019600	36020200	6_TxWk	KIAA0319L
chr1	36020200	36020600	9_EnhA1	KIAA0319L	chr1	36020200	36020800	11_EnhWk	KIAA0319L
chr1	36024000	36024800	2_TssFlnk	NCDN	chr1	36024000	36024800	4_TssFlnkD	NCDN
chr1	36026400	36027000	2_TssFlnk	NCDN	chr1	36026400	36027200	8_EnhG2	NCDN
chr1	36079800	36083200	5_Tx	PSMB2	chr1	36079800	36082600	6_TxWk	PSMB2
chr1	36091000	36093800	6_TxWk	PSMB2	chr1	36091000	36093600	5_Tx	PSMB2
chr1	36104400	36105800	6_TxWk	PSMB2	chr1	36104200	36105800	11_EnhWk	PSMB2
chr1	36105800	36106600	2_TssFlnk	PSMB2	chr1	36105800	36106600	4_TssFlnkD	PSMB2
chr1	36234600	36234800	2_TssFlnk	CLSPN	chr1	36234600	36234800	4_TssFlnkD	CLSPN
chr1	36311000	36311800	9_EnhA1	AGO4	chr1	36311000	36311800	7_EnhG1	AGO4
chr1	36316400	36317800	9_EnhA1	AGO4	chr1	36316200	36317800	11_EnhWk	AGO4
chr1	36489000	36491200	6_TxWk	AGO3	chr1	36488600	36490400	5_Tx	AGO3
chr1	36580600	36581200	10_EnhA2	COL8A2	chr1	36580600	36581200	11_EnhWk	COL8A2
chr1	36584800	36585600	9_EnhA1	COL8A2	chr1	36584600	36585600	11_EnhWk	COL8A2
chr1	36585800	36587600	6_TxWk	COL8A2	chr1	36585600	36588000	14_ReprPCWk	COL8A2
chr1	36613800	36614400	2_TssFlnk	TRAPPC3	chr1	36614000	36614600	4_TssFlnkD	TRAPPC3
chr1	36626400	36627400	1_TssA	MAP7D1	chr1	36626000	36627000	8_EnhG2	MAP7D1
chr1	36633400	36635600	5_Tx	MAP7D1	chr1	36632200	36635400	7_EnhG1	MAP7D1
chr1	36691400	36691800	2_TssFlnk	THRAP3	chr1	36691400	36691800	3_TssFlnkU	THRAP3
chr1	36704200	36704800	3_TssFlnkU	THRAP3	chr1	36704200	36704600	4_TssFlnkD	THRAP3
chr1	36706200	36706400	10_EnhA2	THRAP3	chr1	36706200	36706400	9_EnhA1	THRAP3
chr1	36709600	36710200	10_EnhA2	THRAP3	chr1	36709600	36710200	9_EnhA1	THRAP3
chr1	36712800	36713400	6_TxWk	THRAP3	chr1	36712800	36713600	10_EnhA2	THRAP3
chr1	36713800	36714400	9_EnhA1	THRAP3	chr1	36714000	36714400	10_EnhA2	THRAP3
chr1	36714600	36716600	6_TxWk	THRAP3	chr1	36714800	36716400	7_EnhG1	THRAP3
chr1	36716600	36718200	10_EnhA2	THRAP3	chr1	36716600	36717800	11_EnhWk	THRAP3
chr1	36718200	36722000	6_TxWk	THRAP3	chr1	36718600	36723000	11_EnhWk	THRAP3
chr1	36723600	36725200	6_TxWk	THRAP3	chr1	36724000	36725200	7_EnhG1	THRAP3
chr1	36729400	36730800	5_Tx	THRAP3	chr1	36729800	36731400	6_TxWk	THRAP3
chr1	36732400	36734600	6_TxWk	THRAP3	chr1	36733200	36734800	7_EnhG1	THRAP3
chr1	36743000	36744600	10_EnhA2	THRAP3	chr1	36742600	36744000	7_EnhG1	THRAP3
chr1	36771988	36772000	6_TxWk	SH3D21	chr1	36771988	36772000	11_EnhWk	SH3D21
chr1	36773200	36775400	5_Tx	SH3D21	chr1	36773200	36775400	6_TxWk	SH3D21
chr1	36782600	36785400	6_TxWk	SH3D21	chr1	36782800	36785600	5_Tx	SH3D21
chr1	36859800	36862200	6_TxWk	LSM10	chr1	36860600	36862600	11_EnhWk	LSM10
chr1	36881428	36887200	6_TxWk	OSCP1	chr1	36881428	36886200	15_NA	OSCP1
chr1	36931644	36935600	15_NA	CSF3R	chr1	36931800	36937200	14_ReprPCWk	CSF3R
chr1	37964800	37965400	9_EnhA1	MEAF6	chr1	37964600	37965400	7_EnhG1	MEAF6
chr1	37978800	37979200	7_EnhG1	MEAF6	chr1	37978800	37979200	8_EnhG2	MEAF6
chr1	38000800	38002000	6_TxWk	SNIP1	chr1	38000600	38001800	7_EnhG1	SNIP1
chr1	38022520	38022600	2_TssFlnk	DNALI1	chr1	38022520	38022600	11_EnhWk	DNALI1
chr1	38025800	38026800	7_EnhG1	DNALI1	chr1	38026000	38026800	6_TxWk	DNALI1
chr1	38060400	38061000	2_TssFlnk	GNL2	chr1	38060200	38060800	4_TssFlnkD	GNL2
chr1	38147600	38148400	7_EnhG1	C1orf109	chr1	38147242	38148400	6_TxWk	C1orf109
chr1	38154800	38155200	3_TssFlnkU	C1orf109	chr1	38154800	38155200	4_TssFlnkD	C1orf109
chr1	38155200	38156200	1_TssA	C1orf109	chr1	38155200	38156200	3_TssFlnkU	C1orf109
chr1	38156200	38157600	2_TssFlnk	C1orf109	chr1	38156400	38157600	4_TssFlnkD	C1orf109
chr1	38265800	38266809	5_Tx	MANEAL	chr1	38266200	38266809	6_TxWk	MANEAL
chr1	38272651	38273000	4_TssFlnkD	C1orf122	chr1	38272651	38273200	3_TssFlnkU	C1orf122
chr1	38275239	38276600	10_EnhA2	MTF1	chr1	38275600	38277000	11_EnhWk	MTF1
chr1	38323400	38324200	6_TxWk	MTF1	chr1	38323600	38324200	11_EnhWk	MTF1
chr1	38354200	38356800	5_Tx	INPP5B	chr1	38355200	38357800	7_EnhG1	INPP5B
chr1	38358200	38358800	10_EnhA2	INPP5B	chr1	38357800	38358800	9_EnhA1	INPP5B
chr1	38358800	38359800	6_TxWk	INPP5B	chr1	38358800	38359800	10_EnhA2	INPP5B
chr1	38397200	38397800	2_TssFlnk	INPP5B	chr1	38397400	38398000	4_TssFlnkD	INPP5B
chr1	38411600	38412600	3_TssFlnkU	INPP5B	chr1	38411800	38412729	1_TssA	INPP5B
chr1	38433600	38434600	7_EnhG1	SF3A3	chr1	38433800	38435000	5_Tx	SF3A3
chr1	38454200	38454600	11_EnhWk	SF3A3	chr1	38454000	38454600	7_EnhG1	SF3A3
chr1	38454600	38455200	2_TssFlnk	SF3A3	chr1	38454600	38455000	3_TssFlnkU	SF3A3
chr1	38475200	38477800	15_NA	UTP11	chr1	38475600	38477600	6_TxWk	UTP11
chr1	38482800	38483000	7_EnhG1	UTP11	chr1	38482800	38483000	6_TxWk	UTP11
chr1	39328636	39329600	6_TxWk	MYCBP	chr1	39329000	39329800	5_Tx	MYCBP
chr1	39383800	39407000	6_TxWk	RHBDL2	chr1	39386800	39407200	15_NA	RHBDL2
chr1	39457600	39458800	2_TssFlnk	AKIRIN1	chr1	39458000	39459000	4_TssFlnkD	AKIRIN1
chr1	39552200	39552800	9_EnhA1	MACF1	chr1	39552200	39553200	11_EnhWk	MACF1
chr1	39555200	39556000	9_EnhA1	MACF1	chr1	39555400	39556000	11_EnhWk	MACF1
chr1	39556000	39558200	11_EnhWk	MACF1	chr1	39556000	39557800	6_TxWk	MACF1
chr1	39569600	39570400	3_TssFlnkU	MACF1	chr1	39569800	39570600	4_TssFlnkD	MACF1
chr1	39572800	39574200	3_TssFlnkU	MACF1	chr1	39572600	39574600	4_TssFlnkD	MACF1
chr1	39621200	39622800	6_TxWk	MACF1	chr1	39621200	39622400	10_EnhA2	MACF1
chr1	39622800	39623400	10_EnhA2	MACF1	chr1	39622800	39623400	11_EnhWk	MACF1
chr1	39623400	39623800	9_EnhA1	MACF1	chr1	39623400	39623800	7_EnhG1	MACF1
chr1	39623800	39624400	3_TssFlnkU	MACF1	chr1	39623800	39624200	9_EnhA1	MACF1
chr1	39628800	39629200	10_EnhA2	MACF1	chr1	39628600	39629200	7_EnhG1	MACF1
chr1	39629200	39629600	1_TssA	MACF1	chr1	39629200	39629800	8_EnhG2	MACF1
chr1	39631200	39631800	9_EnhA1	MACF1	chr1	39631200	39631600	10_EnhA2	MACF1
chr1	39631800	39633600	10_EnhA2	MACF1	chr1	39632400	39634200	11_EnhWk	MACF1
chr1	39633600	39635600	9_EnhA1	MACF1	chr1	39634200	39636000	6_TxWk	MACF1
chr1	39641200	39642200	10_EnhA2	MACF1	chr1	39640800	39642200	11_EnhWk	MACF1
chr1	39663800	39665200	6_TxWk	MACF1	chr1	39664000	39665000	10_EnhA2	MACF1
chr1	39665200	39665800	10_EnhA2	MACF1	chr1	39665000	39666000	6_TxWk	MACF1
chr1	39670400	39672000	1_TssA	MACF1	chr1	39670200	39671400	3_TssFlnkU	MACF1
chr1	39672000	39672600	2_TssFlnk	MACF1	chr1	39671600	39672600	4_TssFlnkD	MACF1
chr1	39677200	39678200	5_Tx	MACF1	chr1	39677400	39678200	7_EnhG1	MACF1
chr1	39705200	39707600	6_TxWk	MACF1	chr1	39705200	39707800	10_EnhA2	MACF1
chr1	39734600	39735400	7_EnhG1	MACF1	chr1	39734600	39735400	11_EnhWk	MACF1
chr1	39846000	39847800	7_EnhG1	MACF1	chr1	39845400	39847600	5_Tx	MACF1
chr1	39874000	39877600	1_TssA	MACF1	chr1	39874800	39877400	3_TssFlnkU	MACF1
chr1	39876151	39877600	1_TssA	KIAA0754	chr1	39876151	39877400	3_TssFlnkU	KIAA0754
chr1	39974400	39975400	9_EnhA1	BMP8A	chr1	39974400	39975400	11_EnhWk	BMP8A
chr1	39981600	39989800	6_TxWk	BMP8A	chr1	39981800	39988600	14_ReprPCWk	BMP8A
chr1	40105000	40105617	1_TssA	HEYL	chr1	40105200	40105600	2_TssFlnk	HEYL
chr1	40144320	40145400	14_ReprPCWk	HPCAL4	chr1	40144320	40145000	13_ReprPC	HPCAL4
chr1	40158400	40160000	14_ReprPCWk	PPIE	chr1	40157854	40159600	13_ReprPC	PPIE
chr1	40251200	40253200	9_EnhA1	BMP8B	chr1	40251400	40252600	11_EnhWk	BMP8B
chr1	40310400	40311000	10_EnhA2	TRIT1	chr1	40310600	40311000	11_EnhWk	TRIT1
chr1	40332200	40333200	10_EnhA2	TRIT1	chr1	40332400	40333200	9_EnhA1	TRIT1
chr1	40333200	40334400	6_TxWk	TRIT1	chr1	40333200	40334600	10_EnhA2	TRIT1
chr1	40347200	40348200	2_TssFlnk	TRIT1	chr1	40347600	40348600	4_TssFlnkD	TRIT1
chr1	40420802	40422600	1_TssA	MFSD2A	chr1	40420802	40422400	4_TssFlnkD	MFSD2A
chr1	40542200	40542800	9_EnhA1	PPT1	chr1	40542000	40542800	11_EnhWk	PPT1
chr1	40652600	40653800	10_EnhA2	RLF	chr1	40653000	40654000	11_EnhWk	RLF
chr1	40724400	40725000	2_TssFlnk	ZMPSTE24	chr1	40724200	40725200	4_TssFlnkD	ZMPSTE24
chr1	40779600	40781000	10_EnhA2	COL9A2	chr1	40779600	40781400	11_EnhWk	COL9A2
chr1	40942887	40943600	2_TssFlnk	ZFP69	chr1	40942887	40944000	4_TssFlnkD	ZFP69
chr1	40997233	40997600	1_TssA	ZNF684	chr1	40997233	40997600	2_TssFlnk	ZNF684
chr1	41129200	41129600	14_ReprPCWk	RIMS3	chr1	41129000	41129600	12_TssBiv	RIMS3
chr1	41169600	41174000	6_TxWk	NFYC	chr1	41169600	41174400	15_NA	NFYC
chr1	41192800	41194800	10_EnhA2	NFYC	chr1	41193200	41195200	11_EnhWk	NFYC
chr1	41210400	41211800	9_EnhA1	NFYC	chr1	41210600	41212400	11_EnhWk	NFYC
chr1	41249684	41252200	2_TssFlnk	KCNQ4	chr1	41249684	41252000	12_TssBiv	KCNQ4
chr1	41252200	41258200	6_TxWk	KCNQ4	chr1	41252000	41261000	13_ReprPC	KCNQ4
chr1	41264200	41264800	11_EnhWk	KCNQ4	chr1	41264000	41264800	12_TssBiv	KCNQ4
chr1	41264800	41265600	9_EnhA1	KCNQ4	chr1	41264800	41265600	11_EnhWk	KCNQ4
chr1	41267600	41268000	4_TssFlnkD	KCNQ4	chr1	41267400	41268000	12_TssBiv	KCNQ4
chr1	41272000	41273200	9_EnhA1	KCNQ4	chr1	41272000	41274000	11_EnhWk	KCNQ4
chr1	41273400	41282000	6_TxWk	KCNQ4	chr1	41274400	41286200	13_ReprPC	KCNQ4
chr1	41290200	41291200	9_EnhA1	KCNQ4	chr1	41290400	41291600	6_TxWk	KCNQ4
chr1	41291600	41296200	5_Tx	KCNQ4	chr1	41291800	41295800	13_ReprPC	KCNQ4
chr1	41296200	41297800	6_TxWk	KCNQ4	chr1	41296800	41298400	13_ReprPC	KCNQ4
chr1	41300800	41306124	5_Tx	KCNQ4	chr1	41300400	41306124	13_ReprPC	KCNQ4
chr1	41326800	41328018	2_TssFlnk	CITED4	chr1	41327000	41328018	4_TssFlnkD	CITED4
chr1	41648400	41669400	6_TxWk	SCMH1	chr1	41649200	41667400	15_NA	SCMH1
chr1	41706600	41707000	3_TssFlnkU	SCMH1	chr1	41706600	41707200	4_TssFlnkD	SCMH1
chr1	41707200	41707600	2_TssFlnk	SCMH1	chr1	41707200	41707600	1_TssA	SCMH1
chr1	41707600	41707800	1_TssA	SCMH1	chr1	41707600	41707826	2_TssFlnk	SCMH1
chr1	41832800	41834600	6_TxWk	FOXO6	chr1	41832800	41835400	13_ReprPC	FOXO6
chr1	41835400	41836800	6_TxWk	FOXO6	chr1	41835400	41836600	14_ReprPCWk	FOXO6
chr1	41837200	41838800	9_EnhA1	FOXO6	chr1	41837800	41839400	12_TssBiv	FOXO6
chr1	41848200	41849200	6_TxWk	FOXO6	chr1	41848400	41849262	13_ReprPC	FOXO6
chr1	41944446	41947600	6_TxWk	EDN2	chr1	41945200	41947800	14_ReprPCWk	EDN2
chr1	41948800	41950344	14_ReprPCWk	EDN2	chr1	41949000	41950344	13_ReprPC	EDN2
chr1	41979800	41982200	11_EnhWk	HIVEP3	chr1	41979000	41981400	6_TxWk	HIVEP3
chr1	41982200	41983000	6_TxWk	HIVEP3	chr1	41982400	41983000	11_EnhWk	HIVEP3
chr1	42078200	42078400	10_EnhA2	HIVEP3	chr1	42078200	42078400	14_ReprPCWk	HIVEP3
chr1	42078400	42081200	9_EnhA1	HIVEP3	chr1	42078400	42080600	11_EnhWk	HIVEP3
chr1	42081800	42084600	9_EnhA1	HIVEP3	chr1	42080600	42083600	6_TxWk	HIVEP3
chr1	42130400	42132400	11_EnhWk	HIVEP3	chr1	42131200	42132600	6_TxWk	HIVEP3
chr1	42139400	42140000	10_EnhA2	HIVEP3	chr1	42139400	42139800	12_TssBiv	HIVEP3
chr1	42140000	42143000	6_TxWk	HIVEP3	chr1	42141200	42143200	14_ReprPCWk	HIVEP3
chr1	42156000	42161600	6_TxWk	HIVEP3	chr1	42156200	42160200	15_NA	HIVEP3
chr1	42163200	42166000	6_TxWk	HIVEP3	chr1	42163200	42165400	13_ReprPC	HIVEP3
chr1	42170600	42174200	14_ReprPCWk	HIVEP3	chr1	42171000	42174800	13_ReprPC	HIVEP3
chr1	42175000	42179000	14_ReprPCWk	HIVEP3	chr1	42175600	42178000	13_ReprPC	HIVEP3
chr1	42180400	42186800	15_NA	HIVEP3	chr1	42179600	42184800	14_ReprPCWk	HIVEP3
chr1	42193600	42194600	9_EnhA1	HIVEP3	chr1	42194000	42194600	11_EnhWk	HIVEP3
chr1	42197000	42203800	14_ReprPCWk	HIVEP3	chr1	42198200	42202400	13_ReprPC	HIVEP3
chr1	42205200	42205400	10_EnhA2	HIVEP3	chr1	42205200	42205400	11_EnhWk	HIVEP3
chr1	42217600	42227600	15_NA	HIVEP3	chr1	42215200	42228400	14_ReprPCWk	HIVEP3
chr1	42229800	42236000	15_NA	HIVEP3	chr1	42231600	42236600	14_ReprPCWk	HIVEP3
chr1	42240600	42243000	11_EnhWk	HIVEP3	chr1	42240000	42242800	14_ReprPCWk	HIVEP3
chr1	42243000	42248600	6_TxWk	HIVEP3	chr1	42244400	42248400	14_ReprPCWk	HIVEP3
chr1	42322000	42322600	11_EnhWk	HIVEP3	chr1	42322200	42322800	12_TssBiv	HIVEP3
chr1	42322600	42327600	14_ReprPCWk	HIVEP3	chr1	42322800	42326200	13_ReprPC	HIVEP3
chr1	42329200	42329800	6_TxWk	HIVEP3	chr1	42329200	42330000	13_ReprPC	HIVEP3
chr1	42359000	42364200	6_TxWk	HIVEP3	chr1	42358800	42367000	15_NA	HIVEP3
chr1	42366600	42368600	9_EnhA1	HIVEP3	chr1	42367000	42368200	11_EnhWk	HIVEP3
chr1	42420800	42422000	9_EnhA1	HIVEP3	chr1	42420200	42422000	11_EnhWk	HIVEP3
chr1	42620000	42621495	14_ReprPCWk	GUCA2B	chr1	42619092	42621495	13_ReprPC	GUCA2B
chr1	42645800	42650200	5_Tx	FOXJ3	chr1	42647400	42651400	6_TxWk	FOXJ3
chr1	42675400	42676200	11_EnhWk	FOXJ3	chr1	42675000	42676200	9_EnhA1	FOXJ3
chr1	42707000	42707400	10_EnhA2	FOXJ3	chr1	42706800	42707400	11_EnhWk	FOXJ3
chr1	42899600	42901800	14_ReprPCWk	ZMYND12	chr1	42899800	42901200	13_ReprPC	ZMYND12
chr1	42921400	42921800	2_TssFlnk	ZMYND12	chr1	42921400	42921800	4_TssFlnkD	ZMYND12
chr1	42921788	42921800	2_TssFlnk	PPCS	chr1	42921788	42921800	4_TssFlnkD	PPCS
chr1	42928600	42929200	1_TssA	PPCS	chr1	42928400	42929400	2_TssFlnk	PPCS
chr1	43124096	43124400	2_TssFlnk	PPIH	chr1	43124200	43124400	1_TssA	PPIH
chr1	43124400	43124600	1_TssA	PPIH	chr1	43124400	43124600	2_TssFlnk	PPIH
chr1	43135600	43136600	9_EnhA1	PPIH	chr1	43135800	43136400	10_EnhA2	PPIH
chr1	43140600	43141400	7_EnhG1	PPIH	chr1	43140800	43141800	5_Tx	PPIH
chr1	43151200	43152200	6_TxWk	YBX1	chr1	43151400	43152400	7_EnhG1	YBX1
chr1	43198764	43204600	15_NA	CLDN19	chr1	43199200	43205000	14_ReprPCWk	CLDN19
chr1	43204600	43205925	14_ReprPCWk	CLDN19	chr1	43205000	43205925	13_ReprPC	CLDN19
chr1	43250800	43251200	2_TssFlnk	C1orf50	chr1	43250600	43251200	11_EnhWk	C1orf50
chr1	43252000	43260600	15_NA	C1orf50	chr1	43251200	43260000	14_ReprPCWk	C1orf50
chr1	43260600	43263968	14_ReprPCWk	C1orf50	chr1	43260000	43263200	13_ReprPC	C1orf50
chr1	43613600	43614000	12_TssBiv	FAM183A	chr1	43613600	43614000	2_TssFlnk	FAM183A
chr1	43814200	43815200	2_TssFlnk	MPL	chr1	43814400	43815200	12_TssBiv	MPL
chr1	43832000	43832400	2_TssFlnk	ELOVL1	chr1	43831800	43832400	11_EnhWk	ELOVL1
chr1	43856000	43856200	2_TssFlnk	SZT2	chr1	43856000	43856200	3_TssFlnkU	SZT2
chr1	43996400	43998200	2_TssFlnk	PTPRF	chr1	43996200	43998200	12_TssBiv	PTPRF
chr1	44031000	44031600	11_EnhWk	PTPRF	chr1	44031200	44031600	4_TssFlnkD	PTPRF
chr1	44031600	44032000	2_TssFlnk	PTPRF	chr1	44031600	44032000	12_TssBiv	PTPRF
chr1	44032200	44037000	6_TxWk	PTPRF	chr1	44032400	44037200	14_ReprPCWk	PTPRF
chr1	44052000	44054200	9_EnhA1	PTPRF	chr1	44052400	44054000	11_EnhWk	PTPRF
chr1	44132200	44133000	9_EnhA1	KDM4A	chr1	44132200	44132800	7_EnhG1	KDM4A
chr1	44133000	44134800	7_EnhG1	KDM4A	chr1	44132800	44134200	5_Tx	KDM4A
chr1	44181400	44181800	11_EnhWk	ST3GAL3	chr1	44181400	44181800	9_EnhA1	ST3GAL3
chr1	44214000	44219400	5_Tx	ST3GAL3	chr1	44215200	44219400	6_TxWk	ST3GAL3
chr1	44243000	44246000	5_Tx	ST3GAL3	chr1	44243000	44244800	6_TxWk	ST3GAL3
chr1	44249000	44250000	9_EnhA1	ST3GAL3	chr1	44249000	44250000	11_EnhWk	ST3GAL3
chr1	44250600	44252000	7_EnhG1	ST3GAL3	chr1	44250000	44251800	6_TxWk	ST3GAL3
chr1	44252000	44253800	9_EnhA1	ST3GAL3	chr1	44251800	44253400	11_EnhWk	ST3GAL3
chr1	44265400	44266200	7_EnhG1	ST3GAL3	chr1	44265400	44266200	11_EnhWk	ST3GAL3
chr1	44323800	44324800	7_EnhG1	ST3GAL3	chr1	44323600	44324600	11_EnhWk	ST3GAL3
chr1	44325000	44326600	6_TxWk	ST3GAL3	chr1	44325400	44326600	5_Tx	ST3GAL3
chr1	44378000	44379200	9_EnhA1	ST3GAL3	chr1	44378000	44379000	11_EnhWk	ST3GAL3
chr1	44402600	44402913	14_ReprPCWk	ARTN	chr1	44402600	44402913	13_ReprPC	ARTN
chr1	44441200	44441600	2_TssFlnk	ATP6V0B	chr1	44441200	44441800	4_TssFlnkD	ATP6V0B
chr1	44442600	44443967	6_TxWk	ATP6V0B	chr1	44442400	44443800	5_Tx	ATP6V0B
chr1	44446600	44446800	11_EnhWk	B4GALT2	chr1	44446600	44446800	8_EnhG2	B4GALT2
chr1	44461600	44462200	10_EnhA2	CCDC24	chr1	44461600	44462200	11_EnhWk	CCDC24
chr1	44461600	44463000	10_EnhA2	SLC6A9	chr1	44461600	44462800	11_EnhWk	SLC6A9
chr1	44683000	44683800	6_TxWk	DMAP1	chr1	44683200	44684200	7_EnhG1	DMAP1
chr1	44753200	44757000	5_Tx	ERI3	chr1	44754400	44758600	6_TxWk	ERI3
chr1	44758200	44760400	10_EnhA2	ERI3	chr1	44758600	44761000	11_EnhWk	ERI3
chr1	44796400	44800800	5_Tx	ERI3	chr1	44794800	44799600	6_TxWk	ERI3
chr1	44800800	44801800	6_TxWk	ERI3	chr1	44800400	44802000	5_Tx	ERI3
chr1	44952800	44955200	6_TxWk	RNF220	chr1	44952800	44954600	15_NA	RNF220
chr1	45083400	45083800	13_ReprPC	RNF220	chr1	45083400	45084000	14_ReprPCWk	RNF220
chr1	45137600	45138800	9_EnhA1	TMEM53	chr1	45137200	45139200	11_EnhWk	TMEM53
chr1	45139000	45139600	3_TssFlnkU	TMEM53	chr1	45139200	45139800	4_TssFlnkD	TMEM53
chr1	45140364	45140400	1_TssA	ARMH1	chr1	45140364	45140400	2_TssFlnk	ARMH1
chr1	45140400	45140800	3_TssFlnkU	ARMH1	chr1	45140400	45140800	4_TssFlnkD	ARMH1
chr1	45140800	45141600	10_EnhA2	ARMH1	chr1	45140800	45141600	11_EnhWk	ARMH1
chr1	45143400	45155400	6_TxWk	ARMH1	chr1	45143600	45153000	14_ReprPCWk	ARMH1
chr1	45183000	45183400	9_EnhA1	ARMH1	chr1	45182800	45183400	12_TssBiv	ARMH1
chr1	45188000	45191263	6_TxWk	ARMH1	chr1	45188000	45190000	14_ReprPCWk	ARMH1
chr1	45243200	45244451	5_Tx	RPS8	chr1	45243400	45244400	7_EnhG1	RPS8
chr1	45279200	45279800	8_EnhG2	BTBD19	chr1	45279200	45279600	7_EnhG1	BTBD19
chr1	45285516	45286000	1_TssA	PTCH2	chr1	45285600	45286200	3_TssFlnkU	PTCH2
chr1	45308600	45308735	2_TssFlnk	PTCH2	chr1	45308600	45308735	4_TssFlnkD	PTCH2
chr1	45412000	45412800	9_EnhA1	EIF2B3	chr1	45411800	45412800	11_EnhWk	EIF2B3
chr1	45476000	45476800	2_TssFlnk	HECTD3	chr1	45475800	45476600	4_TssFlnkD	HECTD3
chr1	45476800	45477000	1_TssA	HECTD3	chr1	45476800	45477001	3_TssFlnkU	HECTD3
chr1	45478600	45479000	2_TssFlnk	UROD	chr1	45478600	45479000	4_TssFlnkD	UROD
chr1	45496200	45511800	14_ReprPCWk	ZSWIM5	chr1	45498000	45511000	15_NA	ZSWIM5
chr1	45540400	45542800	13_ReprPC	ZSWIM5	chr1	45540800	45543000	14_ReprPCWk	ZSWIM5
chr1	45792545	45793200	2_TssFlnk	HPDL	chr1	45792800	45793200	12_TssBiv	HPDL
chr1	45795600	45800000	5_Tx	MUTYH	chr1	45794835	45799000	6_TxWk	MUTYH
chr1	45807000	45807400	6_TxWk	TOE1	chr1	45806800	45807400	11_EnhWk	TOE1
chr1	45825600	45825800	10_EnhA2	TESK2	chr1	45825600	45825800	2_TssFlnk	TESK2
chr1	45825800	45826600	9_EnhA1	TESK2	chr1	45825800	45826400	11_EnhWk	TESK2
chr1	45955800	45956400	2_TssFlnk	TESK2	chr1	45956000	45956600	4_TssFlnkD	TESK2
chr1	45959538	45965200	6_TxWk	CCDC163P	chr1	45959538	45964800	15_NA	CCDC163P
chr1	45965200	45965751	2_TssFlnk	CCDC163P	chr1	45965200	45965600	4_TssFlnkD	CCDC163P
chr1	45984400	45984600	3_TssFlnkU	PRDX1	chr1	45984400	45984600	8_EnhG2	PRDX1
chr1	45984600	45984800	10_EnhA2	PRDX1	chr1	45984600	45984800	4_TssFlnkD	PRDX1
chr1	45984800	45985200	1_TssA	PRDX1	chr1	45984800	45985200	3_TssFlnkU	PRDX1
chr1	46017800	46018400	6_TxWk	AKR1A1	chr1	46017600	46018200	11_EnhWk	AKR1A1
chr1	46067800	46068400	10_EnhA2	NASP	chr1	46067800	46068600	11_EnhWk	NASP
chr1	46145400	46150200	15_NA	GPBP1L1	chr1	46142400	46150200	11_EnhWk	GPBP1L1
chr1	46154600	46154800	2_TssFlnk	TMEM69	chr1	46154600	46154800	4_TssFlnkD	TMEM69
chr1	46186800	46187400	9_EnhA1	IPP	chr1	46186600	46187600	11_EnhWk	IPP
chr1	46189800	46192800	5_Tx	IPP	chr1	46189400	46194200	6_TxWk	IPP
chr1	46215400	46215600	2_TssFlnk	IPP	chr1	46215400	46215600	4_TssFlnkD	IPP
chr1	46215600	46216322	1_TssA	IPP	chr1	46215600	46216200	3_TssFlnkU	IPP
chr1	46259800	46260200	3_TssFlnkU	MAST2	chr1	46259800	46260200	4_TssFlnkD	MAST2
chr1	46260200	46260400	9_EnhA1	MAST2	chr1	46260200	46260400	2_TssFlnk	MAST2
chr1	46262600	46266600	6_TxWk	MAST2	chr1	46262400	46267600	15_NA	MAST2
chr1	46329800	46330200	3_TssFlnkU	MAST2	chr1	46329600	46330200	4_TssFlnkD	MAST2
chr1	46338600	46346400	6_TxWk	MAST2	chr1	46338000	46346800	15_NA	MAST2
chr1	46352800	46353800	9_EnhA1	MAST2	chr1	46352400	46353800	11_EnhWk	MAST2
chr1	46357400	46358600	9_EnhA1	MAST2	chr1	46357800	46358600	11_EnhWk	MAST2
chr1	46358800	46378200	6_TxWk	MAST2	chr1	46358600	46371400	15_NA	MAST2
chr1	46507400	46508200	9_EnhA1	PIK3R3	chr1	46507000	46508200	11_EnhWk	PIK3R3
chr1	46603800	46611400	15_NA	PIK3R3	chr1	46601600	46610800	14_ReprPCWk	PIK3R3
chr1	46638800	46639800	11_EnhWk	PIK3R3	chr1	46639000	46639800	12_TssBiv	PIK3R3
chr1	46641200	46642160	15_NA	PIK3R3	chr1	46641200	46642160	6_TxWk	PIK3R3
chr1	46662800	46663000	6_TxWk	POMGNT1	chr1	46662800	46663000	2_TssFlnk	POMGNT1
chr1	46664000	46664400	2_TssFlnk	POMGNT1	chr1	46663800	46664400	1_TssA	POMGNT1
chr1	46752600	46753800	5_Tx	LRRC41	chr1	46752400	46754000	6_TxWk	LRRC41
chr1	46753800	46755000	7_EnhG1	LRRC41	chr1	46754000	46755000	11_EnhWk	LRRC41
chr1	46765000	46766000	6_TxWk	LRRC41	chr1	46765200	46766400	11_EnhWk	LRRC41
chr1	46770000	46770600	2_TssFlnk	UQCRH	chr1	46770000	46770600	4_TssFlnkD	UQCRH
chr1	46781000	46782200	6_TxWk	UQCRH	chr1	46781200	46782448	5_Tx	UQCRH
chr1	46876800	46878400	6_TxWk	FAAH	chr1	46876600	46879200	14_ReprPCWk	FAAH
chr1	46879000	46879520	14_ReprPCWk	FAAH	chr1	46879200	46879520	13_ReprPC	FAAH
chr1	47013400	47017199	14_ReprPCWk	KNCN	chr1	47014600	47017199	13_ReprPC	KNCN
chr1	47134527	47134600	2_TssFlnk	TEX38	chr1	47134527	47134600	1_TssA	TEX38
chr1	47183000	47183800	11_EnhWk	EFCAB14	chr1	47183200	47184200	4_TssFlnkD	EFCAB14
chr1	47394849	47407156	15_NA	CYP4A11	chr1	47394849	47407156	14_ReprPCWk	CYP4A11
chr1	47603107	47613200	15_NA	CYP4A22	chr1	47603107	47614000	14_ReprPCWk	CYP4A22
chr1	47613200	47615413	14_ReprPCWk	CYP4A22	chr1	47614000	47615413	13_ReprPC	CYP4A22
chr1	47807800	47810400	6_TxWk	CMPK1	chr1	47807800	47809600	5_Tx	CMPK1
chr1	48226979	48227290	13_ReprPC	FLJ00388	chr1	48226979	48227290	14_ReprPCWk	FLJ00388
chr1	48297400	48303600	15_NA	TRABD2B	chr1	48299200	48303400	14_ReprPCWk	TRABD2B
chr1	48935400	48936000	1_TssA	SPATA6	chr1	48935600	48936200	3_TssFlnkU	SPATA6
chr1	48936000	48936600	10_EnhA2	SPATA6	chr1	48936200	48936800	9_EnhA1	SPATA6
chr1	49035000	49040000	13_ReprPC	AGBL4	chr1	49036400	49040400	14_ReprPCWk	AGBL4
chr1	49084000	49085000	6_TxWk	AGBL4	chr1	49084000	49085200	14_ReprPCWk	AGBL4
chr1	49085200	49085600	2_TssFlnk	AGBL4	chr1	49085200	49085800	12_TssBiv	AGBL4
chr1	49175400	49176400	13_ReprPC	AGBL4	chr1	49175200	49176200	14_ReprPCWk	AGBL4
chr1	49241800	49242641	2_TssFlnk	BEND5	chr1	49242000	49242641	12_TssBiv	BEND5
chr1	49241800	49243400	2_TssFlnk	AGBL4	chr1	49242000	49243200	12_TssBiv	AGBL4
chr1	49246200	49250400	13_ReprPC	AGBL4	chr1	49245400	49251000	14_ReprPCWk	AGBL4
chr1	49254600	49266800	14_ReprPCWk	AGBL4	chr1	49257400	49265000	15_NA	AGBL4
chr1	49344000	49345000	9_EnhA1	AGBL4	chr1	49344200	49345000	11_EnhWk	AGBL4
chr1	49345200	49351200	15_NA	AGBL4	chr1	49345000	49349200	14_ReprPCWk	AGBL4
chr1	49408800	49409800	9_EnhA1	AGBL4	chr1	49409000	49409800	11_EnhWk	AGBL4
chr1	51232800	51234000	10_EnhA2	FAF1	chr1	51233200	51234000	11_EnhWk	FAF1
chr1	51248600	51248800	10_EnhA2	FAF1	chr1	51248600	51248800	2_TssFlnk	FAF1
chr1	51305000	51328000	6_TxWk	FAF1	chr1	51296000	51322400	15_NA	FAF1
chr1	51425200	51425800	2_TssFlnk	FAF1	chr1	51425400	51425935	1_TssA	FAF1
chr1	51704000	51704800	8_EnhG2	RNF11	chr1	51704200	51704800	4_TssFlnkD	RNF11
chr1	51727800	51728600	10_EnhA2	RNF11	chr1	51727800	51728400	11_EnhWk	RNF11
chr1	51737400	51739127	6_TxWk	RNF11	chr1	51738000	51739127	5_Tx	RNF11
chr1	51759400	51761400	9_EnhA1	TTC39A	chr1	51759200	51761600	11_EnhWk	TTC39A
chr1	51775000	51782000	15_NA	TTC39A	chr1	51773400	51779600	6_TxWk	TTC39A
chr1	51875400	51876200	10_EnhA2	EPS15	chr1	51875400	51876000	6_TxWk	EPS15
chr1	51876200	51877200	9_EnhA1	EPS15	chr1	51876400	51877200	11_EnhWk	EPS15
chr1	51983000	51984400	1_TssA	EPS15	chr1	51983000	51984200	4_TssFlnkD	EPS15
chr1	51984400	51984800	2_TssFlnk	EPS15	chr1	51984200	51984800	1_TssA	EPS15
chr1	51984800	51985000	1_TssA	EPS15	chr1	51984800	51985000	2_TssFlnk	EPS15
chr1	52042851	52053000	15_NA	OSBPL9	chr1	52042851	52052400	14_ReprPCWk	OSBPL9
chr1	52067600	52077800	15_NA	OSBPL9	chr1	52063000	52075600	14_ReprPCWk	OSBPL9
chr1	52079600	52082600	6_TxWk	OSBPL9	chr1	52079200	52082000	15_NA	OSBPL9
chr1	52102000	52103400	10_EnhA2	OSBPL9	chr1	52102200	52103400	9_EnhA1	OSBPL9
chr1	52103400	52107400	6_TxWk	OSBPL9	chr1	52103400	52108000	11_EnhWk	OSBPL9
chr1	52128200	52129000	10_EnhA2	OSBPL9	chr1	52127800	52128800	11_EnhWk	OSBPL9
chr1	52390200	52406400	6_TxWk	RAB3B	chr1	52393200	52403200	15_NA	RAB3B
chr1	52412400	52421200	6_TxWk	RAB3B	chr1	52412200	52420600	15_NA	RAB3B
chr1	52421400	52434600	15_NA	RAB3B	chr1	52420600	52435600	6_TxWk	RAB3B
chr1	52499800	52500000	10_EnhA2	TXNDC12	chr1	52499800	52500000	11_EnhWk	TXNDC12
chr1	52523000	52523600	9_EnhA1	BTF3L4	chr1	52522800	52523400	3_TssFlnkU	BTF3L4
chr1	52523600	52525400	6_TxWk	BTF3L4	chr1	52524000	52525600	11_EnhWk	BTF3L4
chr1	52608800	52609000	2_TssFlnk	ZFYVE9	chr1	52608800	52609000	4_TssFlnkD	ZFYVE9
chr1	52624800	52625200	9_EnhA1	ZFYVE9	chr1	52624600	52625200	11_EnhWk	ZFYVE9
chr1	52800200	52801000	10_EnhA2	ZFYVE9	chr1	52800200	52800800	11_EnhWk	ZFYVE9
chr1	53068400	53069000	1_TssA	GPX7	chr1	53068400	53069200	4_TssFlnkD	GPX7
chr1	53134000	53135355	9_EnhA1	SHISAL2A	chr1	53133600	53135355	11_EnhWk	SHISAL2A
chr1	53163200	53163800	2_TssFlnk	COA7	chr1	53163000	53163600	4_TssFlnkD	COA7
chr1	53163800	53164000	1_TssA	COA7	chr1	53163800	53164038	2_TssFlnk	COA7
chr1	53193000	53193600	2_TssFlnk	ZYG11B	chr1	53193000	53193600	4_TssFlnkD	ZYG11B
chr1	53387600	53389400	13_ReprPC	ECHDC2	chr1	53387800	53390200	14_ReprPCWk	ECHDC2
chr1	53393400	53394000	2_TssFlnk	SCP2	chr1	53393400	53394000	4_TssFlnkD	SCP2
chr1	53394000	53417600	6_TxWk	SCP2	chr1	53394200	53414200	15_NA	SCP2
chr1	53550400	53551174	11_EnhWk	PODN	chr1	53550400	53551174	13_ReprPC	PODN
chr1	53555600	53568200	15_NA	SLC1A7	chr1	53557200	53569000	14_ReprPCWk	SLC1A7
chr1	53593600	53600600	15_NA	SLC1A7	chr1	53590400	53599800	14_ReprPCWk	SLC1A7
chr1	53605000	53606600	10_EnhA2	SLC1A7	chr1	53605200	53606200	11_EnhWk	SLC1A7
chr1	53606600	53608289	6_TxWk	SLC1A7	chr1	53606200	53608289	14_ReprPCWk	SLC1A7
chr1	53685200	53685800	2_TssFlnk	C1orf123	chr1	53685200	53685800	4_TssFlnkD	C1orf123
chr1	53715000	53716200	7_EnhG1	LRP8	chr1	53715400	53716400	6_TxWk	LRP8
chr1	53791400	53791800	1_TssA	LRP8	chr1	53791200	53791800	4_TssFlnkD	LRP8
chr1	53791800	53793200	2_TssFlnk	LRP8	chr1	53792200	53793600	4_TssFlnkD	LRP8
chr1	54037800	54039000	9_EnhA1	GLIS1	chr1	54037800	54038800	11_EnhWk	GLIS1
chr1	54135200	54135800	10_EnhA2	GLIS1	chr1	54135200	54136000	11_EnhWk	GLIS1
chr1	54164200	54189000	15_NA	GLIS1	chr1	54161600	54186600	6_TxWk	GLIS1
chr1	54231133	54231600	6_TxWk	NDC1	chr1	54231133	54231800	15_NA	NDC1
chr1	54304400	54304533	2_TssFlnk	NDC1	chr1	54304400	54304533	14_ReprPCWk	NDC1
chr1	54317800	54319000	6_TxWk	YIPF1	chr1	54318200	54319400	5_Tx	YIPF1
chr1	54354800	54355000	4_TssFlnkD	YIPF1	chr1	54354800	54355000	2_TssFlnk	YIPF1
chr1	54356200	54356407	9_EnhA1	YIPF1	chr1	54356200	54356400	11_EnhWk	YIPF1
chr1	54367600	54369000	9_EnhA1	DIO1	chr1	54367800	54368800	11_EnhWk	DIO1
chr1	54375800	54376200	9_EnhA1	DIO1	chr1	54375600	54376200	11_EnhWk	DIO1
chr1	54420600	54422200	6_TxWk	LRRC42	chr1	54420000	54422200	7_EnhG1	LRRC42
chr1	54573000	54578192	15_NA	TCEANC2	chr1	54573000	54578192	14_ReprPCWk	TCEANC2
chr1	54626600	54651600	6_TxWk	RP11-446E24.4	chr1	54633800	54650600	15_NA	RP11-446E24.4
chr1	54635333	54637997	6_TxWk	AL357673.1	chr1	54635333	54637997	15_NA	AL357673.1
chr1	54703710	54704736	5_Tx	SSBP3-AS1	chr1	54703800	54704736	6_TxWk	SSBP3-AS1
chr1	54741800	54744200	10_EnhA2	SSBP3	chr1	54741000	54743400	11_EnhWk	SSBP3
chr1	54747200	54747600	10_EnhA2	SSBP3	chr1	54747000	54747600	11_EnhWk	SSBP3
chr1	54829400	54831800	9_EnhA1	SSBP3	chr1	54830000	54831600	11_EnhWk	SSBP3
chr1	54857600	54861600	5_Tx	SSBP3	chr1	54858200	54862600	6_TxWk	SSBP3
chr1	55007930	55008400	1_TssA	ACOT11	chr1	55007930	55008400	3_TssFlnkU	ACOT11
chr1	55008400	55009000	3_TssFlnkU	ACOT11	chr1	55008400	55009000	9_EnhA1	ACOT11
chr1	55010800	55011400	10_EnhA2	ACOT11	chr1	55010600	55011200	11_EnhWk	ACOT11
chr1	55023200	55026000	9_EnhA1	ACOT11	chr1	55023200	55027400	11_EnhWk	ACOT11
chr1	55040200	55041400	7_EnhG1	ACOT11	chr1	55040200	55041800	11_EnhWk	ACOT11
chr1	55046600	55050400	9_EnhA1	ACOT11	chr1	55046800	55050000	11_EnhWk	ACOT11
chr1	55101200	55104865	6_TxWk	ACOT11	chr1	55102600	55104865	14_ReprPCWk	ACOT11
chr1	55321800	55322400	10_EnhA2	DHCR24	chr1	55322000	55322600	11_EnhWk	DHCR24
chr1	55323000	55325000	6_TxWk	DHCR24	chr1	55322800	55324200	7_EnhG1	DHCR24
chr1	55325800	55326800	7_EnhG1	DHCR24	chr1	55326000	55327000	11_EnhWk	DHCR24
chr1	55326800	55327800	9_EnhA1	DHCR24	chr1	55327200	55327800	7_EnhG1	DHCR24
chr1	55349400	55351200	6_TxWk	DHCR24	chr1	55350000	55351600	11_EnhWk	DHCR24
chr1	55516400	55518400	14_ReprPCWk	PCSK9	chr1	55516200	55517800	13_ReprPC	PCSK9
chr1	55522000	55525600	6_TxWk	PCSK9	chr1	55522400	55526400	13_ReprPC	PCSK9
chr1	55530000	55530525	9_EnhA1	PCSK9	chr1	55529800	55530525	11_EnhWk	PCSK9
chr1	55595000	55595600	10_EnhA2	USP24	chr1	55594600	55595600	6_TxWk	USP24
chr1	55629400	55634800	5_Tx	USP24	chr1	55626800	55633600	6_TxWk	USP24
chr1	55677200	55678200	6_TxWk	USP24	chr1	55677000	55678600	11_EnhWk	USP24
chr1	55678200	55679800	2_TssFlnk	USP24	chr1	55678600	55679600	4_TssFlnkD	USP24
chr1	55680200	55680786	2_TssFlnk	USP24	chr1	55680000	55680786	1_TssA	USP24
chr1	57109400	57110200	15_NA	PLPP3	chr1	57109200	57110400	11_EnhWk	PLPP3
chr1	57176400	57181008	15_NA	PRKAA2	chr1	57177000	57180800	6_TxWk	PRKAA2
chr1	57368400	57381600	15_NA	C8A	chr1	57370400	57383894	14_ReprPCWk	C8A
chr1	57394883	57403600	15_NA	C8B	chr1	57394883	57404400	14_ReprPCWk	C8B
chr1	57937400	57939800	14_ReprPCWk	DAB1	chr1	57936400	57939400	6_TxWk	DAB1
chr1	57955000	57955800	10_EnhA2	DAB1	chr1	57955000	57956000	11_EnhWk	DAB1
chr1	58860800	58861600	9_EnhA1	DAB1	chr1	58860600	58861600	11_EnhWk	DAB1
chr1	58864000	58867600	6_TxWk	DAB1	chr1	58861600	58867600	15_NA	DAB1
chr1	59164600	59165200	2_TssFlnk	MYSM1	chr1	59164400	59165200	4_TssFlnkD	MYSM1
chr1	59762600	59763400	1_TssA	FGGY	chr1	59762800	59763400	3_TssFlnkU	FGGY
chr1	59763400	59764000	10_EnhA2	FGGY	chr1	59763400	59764200	9_EnhA1	FGGY
chr1	59782400	59783000	9_EnhA1	FGGY	chr1	59782400	59782800	3_TssFlnkU	FGGY
chr1	59826600	59827600	11_EnhWk	FGGY	chr1	59826600	59827200	6_TxWk	FGGY
chr1	59827600	59832200	6_TxWk	FGGY	chr1	59827200	59830600	15_NA	FGGY
chr1	59842800	59856800	6_TxWk	FGGY	chr1	59842600	59857200	15_NA	FGGY
chr1	59884600	59889200	15_NA	FGGY	chr1	59883800	59888400	6_TxWk	FGGY
chr1	59901000	59909400	15_NA	FGGY	chr1	59903800	59909000	6_TxWk	FGGY
chr1	59911200	59912000	10_EnhA2	FGGY	chr1	59911200	59911800	6_TxWk	FGGY
chr1	59912000	59913000	9_EnhA1	FGGY	chr1	59911800	59913400	11_EnhWk	FGGY
chr1	59948000	59949600	10_EnhA2	FGGY	chr1	59947200	59949400	11_EnhWk	FGGY
chr1	59964800	59965800	6_TxWk	FGGY	chr1	59964600	59965600	11_EnhWk	FGGY
chr1	60077600	60119600	6_TxWk	FGGY	chr1	60077200	60104000	15_NA	FGGY
chr1	60134800	60135000	10_EnhA2	FGGY	chr1	60134800	60135000	11_EnhWk	FGGY
chr1	60170200	60171200	6_TxWk	FGGY	chr1	60170000	60171400	10_EnhA2	FGGY
chr1	60180200	60181000	9_EnhA1	FGGY	chr1	60180200	60181200	11_EnhWk	FGGY
chr1	60203000	60203800	6_TxWk	FGGY	chr1	60203200	60203800	7_EnhG1	FGGY
chr1	60205200	60216200	6_TxWk	FGGY	chr1	60205200	60216600	15_NA	FGGY
chr1	60226800	60227600	9_EnhA1	FGGY	chr1	60227000	60227600	11_EnhWk	FGGY
chr1	60380800	60382200	9_EnhA1	CYP2J2	chr1	60380800	60382200	11_EnhWk	CYP2J2
chr1	60382200	60382800	12_TssBiv	CYP2J2	chr1	60382200	60382600	14_ReprPCWk	CYP2J2
chr1	60391200	60392200	2_TssFlnk	CYP2J2	chr1	60391400	60392462	12_TssBiv	CYP2J2
chr1	60459800	60461600	10_EnhA2	C1orf87	chr1	60459800	60461200	11_EnhWk	C1orf87
chr1	61372800	61385600	6_TxWk	NFIA	chr1	61371000	61390000	14_ReprPCWk	NFIA
chr1	61417000	61417800	10_EnhA2	NFIA	chr1	61417000	61418200	13_ReprPC	NFIA
chr1	61419400	61419800	10_EnhA2	NFIA	chr1	61419400	61419800	14_ReprPCWk	NFIA
chr1	61457200	61465600	15_NA	NFIA	chr1	61456600	61467200	14_ReprPCWk	NFIA
chr1	61477800	61478800	11_EnhWk	NFIA	chr1	61477400	61478400	13_ReprPC	NFIA
chr1	61508400	61509400	12_TssBiv	NFIA	chr1	61508600	61509200	2_TssFlnk	NFIA
chr1	61510400	61515400	14_ReprPCWk	NFIA	chr1	61509200	61515600	6_TxWk	NFIA
chr1	61517000	61519400	13_ReprPC	NFIA	chr1	61517200	61519400	14_ReprPCWk	NFIA
chr1	61521200	61522200	14_ReprPCWk	NFIA	chr1	61520800	61522000	6_TxWk	NFIA
chr1	61544800	61546200	6_TxWk	NFIA	chr1	61544600	61546200	11_EnhWk	NFIA
chr1	61549000	61549600	2_TssFlnk	NFIA	chr1	61548800	61549400	1_TssA	NFIA
chr1	61550600	61553200	6_TxWk	NFIA	chr1	61550400	61552800	11_EnhWk	NFIA
chr1	61554600	61555800	6_TxWk	NFIA	chr1	61554800	61556200	11_EnhWk	NFIA
chr1	61555800	61556800	2_TssFlnk	NFIA	chr1	61556200	61556800	4_TssFlnkD	NFIA
chr1	61556800	61559600	6_TxWk	NFIA	chr1	61556800	61558800	11_EnhWk	NFIA
chr1	61586200	61586600	2_TssFlnk	NFIA	chr1	61586000	61586600	4_TssFlnkD	NFIA
chr1	61605200	61607000	6_TxWk	NFIA	chr1	61604800	61607800	11_EnhWk	NFIA
chr1	61611800	61622800	14_ReprPCWk	NFIA	chr1	61607800	61621800	15_NA	NFIA
chr1	61790800	61800400	14_ReprPCWk	NFIA	chr1	61785600	61799000	15_NA	NFIA
chr1	61894200	61902200	15_NA	NFIA	chr1	61893800	61900000	6_TxWk	NFIA
chr1	61903000	61911600	15_NA	NFIA	chr1	61900200	61911800	6_TxWk	NFIA
chr1	62189800	62190400	2_TssFlnk	TM2D1	chr1	62189800	62190200	4_TssFlnkD	TM2D1
chr1	62608800	62629592	15_NA	PATJ	chr1	62602600	62629592	14_ReprPCWk	PATJ
chr1	62729800	62745000	15_NA	KANK4	chr1	62729800	62745200	14_ReprPCWk	KANK4
chr1	62762200	62765200	6_TxWk	KANK4	chr1	62762400	62766600	14_ReprPCWk	KANK4
chr1	62777400	62783200	14_ReprPCWk	KANK4	chr1	62779600	62784200	13_ReprPC	KANK4
chr1	63266600	63266800	10_EnhA2	ATG4C	chr1	63266600	63266800	11_EnhWk	ATG4C
chr1	63276000	63280000	5_Tx	ATG4C	chr1	63274600	63279200	6_TxWk	ATG4C
chr1	63975800	63988200	15_NA	ITGB3BP	chr1	63979800	63988000	6_TxWk	ITGB3BP
chr1	64058600	64058800	2_TssFlnk	ITGB3BP	chr1	64058600	64058800	4_TssFlnkD	ITGB3BP
chr1	64059800	64060000	1_TssA	PGM1	chr1	64059800	64060000	4_TssFlnkD	PGM1
chr1	64102600	64104800	5_Tx	PGM1	chr1	64102200	64104000	6_TxWk	PGM1
chr1	64114600	64116800	6_TxWk	PGM1	chr1	64114000	64116000	5_Tx	PGM1
chr1	64245000	64245600	9_EnhA1	ROR1	chr1	64244800	64245400	11_EnhWk	ROR1
chr1	64293800	64296400	6_TxWk	ROR1	chr1	64292800	64296200	11_EnhWk	ROR1
chr1	64381800	64385800	15_NA	ROR1	chr1	64382800	64386600	6_TxWk	ROR1
chr1	64387200	64393600	15_NA	ROR1	chr1	64387200	64393800	6_TxWk	ROR1
chr1	64394200	64401000	15_NA	ROR1	chr1	64395000	64400800	6_TxWk	ROR1
chr1	64426400	64432000	14_ReprPCWk	ROR1	chr1	64426600	64434600	6_TxWk	ROR1
chr1	64472800	64485400	15_NA	ROR1	chr1	64472600	64485400	6_TxWk	ROR1
chr1	64505800	64508000	6_TxWk	ROR1	chr1	64506600	64508000	11_EnhWk	ROR1
chr1	64510000	64510200	10_EnhA2	ROR1	chr1	64510000	64510200	11_EnhWk	ROR1
chr1	64539800	64546200	15_NA	ROR1	chr1	64540000	64546000	6_TxWk	ROR1
chr1	64558600	64560200	10_EnhA2	ROR1	chr1	64558600	64560200	11_EnhWk	ROR1
chr1	64632400	64633200	11_EnhWk	ROR1	chr1	64632400	64633600	9_EnhA1	ROR1
chr1	64677200	64678000	15_NA	UBE2U	chr1	64677000	64678200	11_EnhWk	UBE2U
chr1	64678200	64688800	15_NA	UBE2U	chr1	64678200	64685800	6_TxWk	UBE2U
chr1	64971000	64971600	12_TssBiv	CACHD1	chr1	64970800	64971800	2_TssFlnk	CACHD1
chr1	64983400	64985600	14_ReprPCWk	CACHD1	chr1	64983800	64985400	6_TxWk	CACHD1
chr1	65340600	65341800	7_EnhG1	JAK1	chr1	65341000	65342200	5_Tx	JAK1
chr1	65364600	65366000	10_EnhA2	JAK1	chr1	65364800	65366000	6_TxWk	JAK1
chr1	65367000	65368000	9_EnhA1	JAK1	chr1	65366600	65368000	11_EnhWk	JAK1
chr1	65398000	65399000	10_EnhA2	JAK1	chr1	65398200	65399000	11_EnhWk	JAK1
chr1	65697400	65697828	10_EnhA2	AK4	chr1	65697200	65697800	11_EnhWk	AK4
chr1	65721200	65721400	2_TssFlnk	DNAJC6	chr1	65721200	65721400	14_ReprPCWk	DNAJC6
chr1	65731200	65732000	2_TssFlnk	DNAJC6	chr1	65731400	65732000	4_TssFlnkD	DNAJC6
chr1	65732000	65743200	14_ReprPCWk	DNAJC6	chr1	65732200	65741000	15_NA	DNAJC6
chr1	65907200	65924600	6_TxWk	LEPR	chr1	65908400	65928400	15_NA	LEPR
chr1	65924800	65933800	15_NA	LEPR	chr1	65928400	65934400	6_TxWk	LEPR
chr1	65936000	65943200	15_NA	LEPR	chr1	65937400	65942800	6_TxWk	LEPR
chr1	65956400	65957000	10_EnhA2	LEPR	chr1	65956400	65956800	9_EnhA1	LEPR
chr1	65957000	65971000	15_NA	LEPR	chr1	65957200	65971000	6_TxWk	LEPR
chr1	65990800	65992000	2_TssFlnk	LEPR	chr1	65990800	65991600	12_TssBiv	LEPR
chr1	65992000	65993000	14_ReprPCWk	LEPR	chr1	65992200	65992800	11_EnhWk	LEPR
chr1	65993000	65993600	2_TssFlnk	LEPR	chr1	65993200	65993600	11_EnhWk	LEPR
chr1	65993600	66009800	15_NA	LEPR	chr1	65993600	66005600	6_TxWk	LEPR
chr1	66395000	66399200	6_TxWk	PDE4B	chr1	66393800	66399400	14_ReprPCWk	PDE4B
chr1	66672400	66673600	10_EnhA2	PDE4B	chr1	66672600	66674000	11_EnhWk	PDE4B
chr1	66767200	66788000	6_TxWk	PDE4B	chr1	66769600	66796600	15_NA	PDE4B
chr1	66999066	66999600	1_TssA	SGIP1	chr1	66999066	66999400	4_TssFlnkD	SGIP1
chr1	67000200	67028200	15_NA	SGIP1	chr1	67009600	67028400	6_TxWk	SGIP1
chr1	67064200	67065600	10_EnhA2	SGIP1	chr1	67064600	67065600	11_EnhWk	SGIP1
chr1	67065600	67089400	15_NA	SGIP1	chr1	67071800	67089400	6_TxWk	SGIP1
chr1	67089800	67090800	9_EnhA1	SGIP1	chr1	67090200	67090800	11_EnhWk	SGIP1
chr1	67218142	67218400	2_TssFlnk	TCTEX1D1	chr1	67218200	67218400	4_TssFlnkD	TCTEX1D1
chr1	67280800	67289800	6_TxWk	WDR78	chr1	67278568	67289400	15_NA	WDR78
chr1	67395200	67395400	2_TssFlnk	MIER1	chr1	67395200	67395400	11_EnhWk	MIER1
chr1	67409800	67410800	10_EnhA2	MIER1	chr1	67409600	67410600	9_EnhA1	MIER1
chr1	67447600	67447800	6_TxWk	MIER1	chr1	67447600	67447800	11_EnhWk	MIER1
chr1	67516000	67518200	6_TxWk	SLC35D1	chr1	67516800	67518200	11_EnhWk	SLC35D1
chr1	67632083	67644200	15_NA	IL23R	chr1	67632083	67641400	14_ReprPCWk	IL23R
chr1	67805800	67806400	9_EnhA1	IL12RB2	chr1	67805800	67806400	11_EnhWk	IL12RB2
chr1	68224600	68224800	10_EnhA2	GNG12	chr1	68224600	68224800	11_EnhWk	GNG12
chr1	68234200	68236200	5_Tx	GNG12	chr1	68233400	68235800	6_TxWk	GNG12
chr1	68236200	68238200	6_TxWk	GNG12	chr1	68236400	68237800	7_EnhG1	GNG12
chr1	68238200	68240000	5_Tx	GNG12	chr1	68238800	68240400	6_TxWk	GNG12
chr1	68513000	68516000	6_TxWk	DIRAS3	chr1	68511645	68515600	14_ReprPCWk	DIRAS3
chr1	68614200	68615000	7_EnhG1	WLS	chr1	68614200	68615000	5_Tx	WLS
chr1	68615000	68616200	9_EnhA1	WLS	chr1	68615000	68616000	7_EnhG1	WLS
chr1	68638600	68639200	9_EnhA1	WLS	chr1	68638400	68639000	11_EnhWk	WLS
chr1	68698800	68698803	14_ReprPCWk	WLS	chr1	68698800	68698803	11_EnhWk	WLS
chr1	68894505	68911000	15_NA	RPE65	chr1	68898800	68910000	14_ReprPCWk	RPE65
chr1	68911800	68915642	15_NA	RPE65	chr1	68912000	68914400	13_ReprPC	RPE65
chr1	68962000	68962904	2_TssFlnk	DEPDC1	chr1	68961800	68962600	4_TssFlnkD	DEPDC1
chr1	70600400	70606200	15_NA	LRRC7	chr1	70600600	70606200	6_TxWk	LRRC7
chr1	70672400	70672800	2_TssFlnk	SRSF11	chr1	70672400	70673000	4_TssFlnkD	SRSF11
chr1	70688800	70689000	5_Tx	SRSF11	chr1	70688800	70689000	4_TssFlnkD	SRSF11
chr1	70876901	70877400	1_TssA	CTH	chr1	70876901	70877400	2_TssFlnk	CTH
chr1	70892600	70893200	5_Tx	CTH	chr1	70892800	70893200	7_EnhG1	CTH
chr1	71468000	71486000	14_ReprPCWk	PTGER3	chr1	71471400	71487200	15_NA	PTGER3
chr1	71501800	71504400	14_ReprPCWk	PTGER3	chr1	71501400	71503800	13_ReprPC	PTGER3
chr1	71545200	71546400	2_TssFlnk	ZRANB2	chr1	71544800	71546000	4_TssFlnkD	ZRANB2
chr1	72087600	72087800	10_EnhA2	NEGR1	chr1	72087600	72087800	9_EnhA1	NEGR1
chr1	72087800	72088000	11_EnhWk	NEGR1	chr1	72087800	72088000	10_EnhA2	NEGR1
chr1	72088000	72104000	15_NA	NEGR1	chr1	72088000	72104000	6_TxWk	NEGR1
chr1	72582000	72585800	10_EnhA2	NEGR1	chr1	72581800	72585000	6_TxWk	NEGR1
chr1	72587600	72588600	10_EnhA2	NEGR1	chr1	72587200	72588800	9_EnhA1	NEGR1
chr1	74663200	74663871	1_TssA	LRRIQ3	chr1	74663200	74663871	2_TssFlnk	LRRIQ3
chr1	75175400	75177000	6_TxWk	CRYZ	chr1	75175200	75177800	5_Tx	CRYZ
chr1	76191000	76191600	2_TssFlnk	ACADM	chr1	76191200	76191800	4_TssFlnkD	ACADM
chr1	76235800	76251200	6_TxWk	ACADM	chr1	76234000	76251000	15_NA	ACADM
chr1	76251200	76251400	2_TssFlnk	ACADM	chr1	76251200	76251400	3_TssFlnkU	ACADM
chr1	76815000	76835200	14_ReprPCWk	ST6GALNAC3	chr1	76808000	76828000	15_NA	ST6GALNAC3
chr1	77408400	77415600	15_NA	ST6GALNAC5	chr1	77410400	77415200	6_TxWk	ST6GALNAC5
chr1	77462200	77465000	6_TxWk	ST6GALNAC5	chr1	77462800	77465000	11_EnhWk	ST6GALNAC5
chr1	77504000	77505800	6_TxWk	ST6GALNAC5	chr1	77504600	77506200	11_EnhWk	ST6GALNAC5
chr1	77671800	77684000	15_NA	PIGK	chr1	77671200	77684400	6_TxWk	PIGK
chr1	77747736	77749000	2_TssFlnk	AK5	chr1	77748000	77748800	4_TssFlnkD	AK5
chr1	77826600	77835400	15_NA	AK5	chr1	77825800	77834800	6_TxWk	AK5
chr1	77844600	77861000	15_NA	AK5	chr1	77845400	77857400	6_TxWk	AK5
chr1	77887200	77887800	7_EnhG1	AK5	chr1	77887400	77887800	6_TxWk	AK5
chr1	77897800	77903000	15_NA	AK5	chr1	77897200	77902600	6_TxWk	AK5
chr1	77954800	77955800	9_EnhA1	AK5	chr1	77954800	77956200	11_EnhWk	AK5
chr1	78115000	78116800	5_Tx	ZZZ3	chr1	78115000	78117000	6_TxWk	ZZZ3
chr1	78117400	78119000	10_EnhA2	ZZZ3	chr1	78117000	78119400	7_EnhG1	ZZZ3
chr1	78137600	78138200	1_TssA	ZZZ3	chr1	78137800	78138200	4_TssFlnkD	ZZZ3
chr1	78138200	78138800	10_EnhA2	ZZZ3	chr1	78138200	78139000	11_EnhWk	ZZZ3
chr1	78146800	78147400	2_TssFlnk	ZZZ3	chr1	78146800	78147400	4_TssFlnkD	ZZZ3
chr1	78200800	78206200	6_TxWk	USP33	chr1	78201800	78205200	5_Tx	USP33
chr1	78288400	78289200	6_TxWk	MIGA1	chr1	78288600	78289400	7_EnhG1	MIGA1
chr1	78289200	78290000	10_EnhA2	MIGA1	chr1	78289400	78290200	9_EnhA1	MIGA1
chr1	78334200	78335400	5_Tx	MIGA1	chr1	78333800	78335400	7_EnhG1	MIGA1
chr1	78356800	78357400	4_TssFlnkD	NEXN	chr1	78357000	78357400	8_EnhG2	NEXN
chr1	78364800	78365600	5_Tx	NEXN	chr1	78364800	78365400	6_TxWk	NEXN
chr1	78365600	78367400	7_EnhG1	NEXN	chr1	78365400	78367600	11_EnhWk	NEXN
chr1	78368000	78369600	6_TxWk	NEXN	chr1	78368400	78369600	7_EnhG1	NEXN
chr1	78521600	78526800	6_TxWk	GIPC2	chr1	78520800	78527000	15_NA	GIPC2
chr1	78527000	78528200	9_EnhA1	GIPC2	chr1	78527000	78527800	11_EnhWk	GIPC2
chr1	78564000	78564800	10_EnhA2	GIPC2	chr1	78563800	78564600	11_EnhWk	GIPC2
chr1	78579200	78580200	10_EnhA2	GIPC2	chr1	78578600	78580200	11_EnhWk	GIPC2
chr1	78595800	78604133	15_NA	GIPC2	chr1	78592000	78602200	6_TxWk	GIPC2
chr1	78836200	78837400	11_EnhWk	PTGFR	chr1	78836400	78837800	10_EnhA2	PTGFR
chr1	78937600	78938200	11_EnhWk	PTGFR	chr1	78937600	78938400	10_EnhA2	PTGFR
chr1	78950000	78956200	6_TxWk	PTGFR	chr1	78950000	78956000	15_NA	PTGFR
chr1	78956200	78958200	2_TssFlnk	PTGFR	chr1	78956400	78957600	1_TssA	PTGFR
chr1	78987000	79002200	15_NA	PTGFR	chr1	78986200	79005434	6_TxWk	PTGFR
chr1	79117400	79117800	6_TxWk	IFI44	chr1	79117400	79117800	2_TssFlnk	IFI44
chr1	82148800	82155000	15_NA	ADGRL2	chr1	82148600	82154600	6_TxWk	ADGRL2
chr1	82155600	82156600	11_EnhWk	ADGRL2	chr1	82155400	82156600	9_EnhA1	ADGRL2
chr1	82169200	82170400	10_EnhA2	ADGRL2	chr1	82169000	82170200	9_EnhA1	ADGRL2
chr1	82269000	82271800	13_ReprPC	ADGRL2	chr1	82269400	82272400	14_ReprPCWk	ADGRL2
chr1	84569600	84570000	10_EnhA2	PRKACB	chr1	84569600	84570200	11_EnhWk	PRKACB
chr1	84574000	84583200	6_TxWk	PRKACB	chr1	84573800	84583400	15_NA	PRKACB
chr1	84583600	84583800	9_EnhA1	PRKACB	chr1	84583600	84583800	11_EnhWk	PRKACB
chr1	84662200	84665600	5_Tx	PRKACB	chr1	84661200	84665000	6_TxWk	PRKACB
chr1	84831000	84832600	10_EnhA2	SAMD13	chr1	84831000	84833200	11_EnhWk	SAMD13
chr1	84845600	84852400	6_TxWk	SAMD13	chr1	84845800	84855640	15_NA	SAMD13
chr1	84944942	84945800	1_TssA	RPF1	chr1	84945200	84945800	2_TssFlnk	RPF1
chr1	85039200	85039400	2_TssFlnk	CTBS	chr1	85039200	85039400	3_TssFlnkU	CTBS
chr1	85093913	85100703	15_NA	LINC01555	chr1	85093913	85098400	14_ReprPCWk	LINC01555
chr1	85313600	85317400	6_TxWk	LPAR3	chr1	85313600	85317200	14_ReprPCWk	LPAR3
chr1	85317400	85317600	11_EnhWk	LPAR3	chr1	85317400	85317600	14_ReprPCWk	LPAR3
chr1	85414800	85421600	13_ReprPC	MCOLN2	chr1	85411800	85422200	14_ReprPCWk	MCOLN2
chr1	85423200	85442000	14_ReprPCWk	MCOLN2	chr1	85427000	85438600	15_NA	MCOLN2
chr1	85527600	85528200	1_TssA	WDR63	chr1	85527400	85528000	2_TssFlnk	WDR63
chr1	85572200	85584200	14_ReprPCWk	WDR63	chr1	85572600	85580200	15_NA	WDR63
chr1	85665800	85666729	2_TssFlnk	SYDE2	chr1	85665800	85666600	4_TssFlnkD	SYDE2
chr1	85739600	85740400	6_TxWk	BCL10	chr1	85739400	85740400	11_EnhWk	BCL10
chr1	85740800	85741400	3_TssFlnkU	BCL10	chr1	85741000	85741400	2_TssFlnk	BCL10
chr1	85798200	85799800	10_EnhA2	DDAH1	chr1	85798200	85799200	6_TxWk	DDAH1
chr1	85805800	85807000	11_EnhWk	DDAH1	chr1	85806200	85807000	6_TxWk	DDAH1
chr1	85808200	85810000	9_EnhA1	DDAH1	chr1	85808200	85809600	11_EnhWk	DDAH1
chr1	85825800	85826800	10_EnhA2	DDAH1	chr1	85826200	85826800	9_EnhA1	DDAH1
chr1	85829400	85831600	11_EnhWk	DDAH1	chr1	85829200	85831200	6_TxWk	DDAH1
chr1	85834200	85838200	15_NA	DDAH1	chr1	85834200	85838400	6_TxWk	DDAH1
chr1	85838600	85839800	9_EnhA1	DDAH1	chr1	85838400	85840200	11_EnhWk	DDAH1
chr1	85918800	85919800	10_EnhA2	DDAH1	chr1	85918800	85919800	11_EnhWk	DDAH1
chr1	85931200	85931600	3_TssFlnkU	DDAH1	chr1	85931200	85931800	11_EnhWk	DDAH1
chr1	85968200	85969800	6_TxWk	DDAH1	chr1	85967800	85969200	7_EnhG1	DDAH1
chr1	86008200	86009400	5_Tx	DDAH1	chr1	86008000	86009600	6_TxWk	DDAH1
chr1	86025800	86028000	6_TxWk	DDAH1	chr1	86025800	86028600	5_Tx	DDAH1
chr1	86032400	86034000	10_EnhA2	DDAH1	chr1	86033000	86034400	6_TxWk	DDAH1
chr1	86172600	86173200	2_TssFlnk	ZNHIT6	chr1	86172800	86173400	4_TssFlnkD	ZNHIT6
chr1	86535400	86537600	6_TxWk	COL24A1	chr1	86536200	86537600	14_ReprPCWk	COL24A1
chr1	86569000	86570400	14_ReprPCWk	COL24A1	chr1	86569200	86571000	13_ReprPC	COL24A1
chr1	86603000	86603600	10_EnhA2	COL24A1	chr1	86603200	86603600	11_EnhWk	COL24A1
chr1	86859800	86861000	10_EnhA2	ODF2L	chr1	86859800	86860800	11_EnhWk	ODF2L
chr1	86861000	86862023	1_TssA	ODF2L	chr1	86861200	86862023	2_TssFlnk	ODF2L
chr1	86889769	86894800	15_NA	CLCA2	chr1	86889800	86894800	6_TxWk	CLCA2
chr1	86896400	86904000	14_ReprPCWk	CLCA2	chr1	86896600	86902400	15_NA	CLCA2
chr1	86904000	86907600	13_ReprPC	CLCA2	chr1	86902400	86906600	14_ReprPCWk	CLCA2
chr1	86909000	86922241	14_ReprPCWk	CLCA2	chr1	86906600	86922241	15_NA	CLCA2
chr1	87341400	87343400	6_TxWk	SELENOF	chr1	87341800	87344400	5_Tx	SELENOF
chr1	87603400	87604800	14_ReprPCWk	RP5-1052I5.2	chr1	87603600	87604800	13_ReprPC	RP5-1052I5.2
chr1	87620200	87622400	9_EnhA1	RP5-1052I5.2	chr1	87620400	87622200	11_EnhWk	RP5-1052I5.2
chr1	87622800	87624600	15_NA	RP5-1052I5.2	chr1	87622600	87624800	13_ReprPC	RP5-1052I5.2
chr1	87624600	87633800	14_ReprPCWk	RP5-1052I5.2	chr1	87626400	87634000	13_ReprPC	RP5-1052I5.2
chr1	87634000	87634884	6_TxWk	RP5-1052I5.2	chr1	87634000	87634884	14_ReprPCWk	RP5-1052I5.2
chr1	87797800	87798200	4_TssFlnkD	LMO4	chr1	87797600	87798200	8_EnhG2	LMO4
chr1	87798400	87800000	6_TxWk	LMO4	chr1	87798200	87799600	7_EnhG1	LMO4
chr1	89285800	89288600	6_TxWk	PKN2	chr1	89286800	89289200	5_Tx	PKN2
chr1	89356000	89356600	2_TssFlnk	GTF2B	chr1	89356000	89356400	4_TssFlnkD	GTF2B
chr1	89488200	89488577	3_TssFlnkU	GBP3	chr1	89488200	89488577	1_TssA	GBP3
chr1	89530000	89531043	1_TssA	GBP1	chr1	89530200	89531043	3_TssFlnkU	GBP1
chr1	89595200	89610000	6_TxWk	GBP2	chr1	89595200	89616139	15_NA	GBP2
chr1	89597434	89610000	6_TxWk	GBP2	chr1	89595200	89616139	15_NA	GBP2
chr1	89726600	89727200	9_EnhA1	GBP5	chr1	89726400	89727200	11_EnhWk	GBP5
chr1	89835600	89852020	14_ReprPCWk	GBP6	chr1	89840600	89852020	15_NA	GBP6
chr1	90020000	90021200	10_EnhA2	LRRC8B	chr1	90019800	90020800	11_EnhWk	LRRC8B
chr1	90039400	90041000	7_EnhG1	LRRC8B	chr1	90039600	90041000	11_EnhWk	LRRC8B
chr1	90055000	90055600	10_EnhA2	LRRC8B	chr1	90055000	90055400	11_EnhWk	LRRC8B
chr1	90060000	90063423	6_TxWk	LRRC8B	chr1	90058000	90063423	15_NA	LRRC8B
chr1	90461800	90462200	2_TssFlnk	ZNF326	chr1	90461600	90462200	4_TssFlnkD	ZNF326
chr1	91391400	91392200	9_EnhA1	ZNF644	chr1	91391400	91392600	11_EnhWk	ZNF644
chr1	91853200	91866800	14_ReprPCWk	HFM1	chr1	91857000	91869600	15_NA	HFM1
chr1	92151600	92157800	14_ReprPCWk	TGFBR3	chr1	92153800	92159000	6_TxWk	TGFBR3
chr1	92165000	92166200	11_EnhWk	TGFBR3	chr1	92164800	92166800	9_EnhA1	TGFBR3
chr1	92178600	92179200	9_EnhA1	TGFBR3	chr1	92178800	92179400	11_EnhWk	TGFBR3
chr1	92202200	92203200	9_EnhA1	TGFBR3	chr1	92202200	92202800	4_TssFlnkD	TGFBR3
chr1	92221400	92234600	14_ReprPCWk	TGFBR3	chr1	92224000	92234200	6_TxWk	TGFBR3
chr1	92235800	92240200	15_NA	TGFBR3	chr1	92235800	92239600	6_TxWk	TGFBR3
chr1	92257400	92258200	14_ReprPCWk	TGFBR3	chr1	92257200	92258400	11_EnhWk	TGFBR3
chr1	92277400	92281400	14_ReprPCWk	TGFBR3	chr1	92275800	92281400	6_TxWk	TGFBR3
chr1	92330000	92339800	14_ReprPCWk	TGFBR3	chr1	92330600	92337400	15_NA	TGFBR3
chr1	92345000	92350400	14_ReprPCWk	TGFBR3	chr1	92343200	92349800	6_TxWk	TGFBR3
chr1	92357400	92358000	11_EnhWk	TGFBR3	chr1	92357400	92357800	9_EnhA1	TGFBR3
chr1	92521600	92527600	14_ReprPCWk	EPHX4	chr1	92520400	92529093	15_NA	EPHX4
chr1	92763600	92763800	11_EnhWk	GLMN	chr1	92763600	92763800	2_TssFlnk	GLMN
chr1	92765800	92767200	6_TxWk	RPAP2	chr1	92765600	92767000	11_EnhWk	RPAP2
chr1	92863400	92867200	6_TxWk	RPAP2	chr1	92864400	92867613	15_NA	RPAP2
chr1	93220000	93222000	10_EnhA2	EVI5	chr1	93220000	93221200	6_TxWk	EVI5
chr1	93251400	93251600	2_TssFlnk	EVI5	chr1	93251400	93251600	11_EnhWk	EVI5
chr1	93399800	93400200	11_EnhWk	DIPK1A	chr1	93399600	93400200	9_EnhA1	DIPK1A
chr1	93400200	93400800	9_EnhA1	DIPK1A	chr1	93400200	93400600	10_EnhA2	DIPK1A
chr1	93415600	93417200	9_EnhA1	DIPK1A	chr1	93415600	93416600	11_EnhWk	DIPK1A
chr1	93426000	93426200	1_TssA	DIPK1A	chr1	93426000	93426200	2_TssFlnk	DIPK1A
chr1	93426400	93427057	1_TssA	DIPK1A	chr1	93426600	93427057	2_TssFlnk	DIPK1A
chr1	93642800	93643600	6_TxWk	TMED5	chr1	93642400	93643400	11_EnhWk	TMED5
chr1	93647000	93660600	15_NA	CCDC18	chr1	93647600	93665000	6_TxWk	CCDC18
chr1	93815000	93815600	1_TssA	DR1	chr1	93814800	93815400	2_TssFlnk	DR1
chr1	93815600	93816000	2_TssFlnk	DR1	chr1	93815400	93816000	4_TssFlnkD	DR1
chr1	93816000	93819800	6_TxWk	DR1	chr1	93816600	93819400	7_EnhG1	DR1
chr1	93914800	93915400	2_TssFlnk	FNBP1L	chr1	93914400	93915400	12_TssBiv	FNBP1L
chr1	94040400	94042200	5_Tx	BCAR3	chr1	94039200	94042200	7_EnhG1	BCAR3
chr1	94042200	94044800	6_TxWk	BCAR3	chr1	94042200	94044800	5_Tx	BCAR3
chr1	94046200	94048000	7_EnhG1	BCAR3	chr1	94046600	94048800	5_Tx	BCAR3
chr1	94093800	94095400	10_EnhA2	BCAR3	chr1	94094000	94095000	9_EnhA1	BCAR3
chr1	94101600	94102600	10_EnhA2	BCAR3	chr1	94101400	94103000	6_TxWk	BCAR3
chr1	94145800	94147600	1_TssA	BCAR3	chr1	94145800	94148200	3_TssFlnkU	BCAR3
chr1	94161400	94166600	6_TxWk	BCAR3	chr1	94159800	94166600	15_NA	BCAR3
chr1	94167800	94168600	10_EnhA2	BCAR3	chr1	94167600	94168600	9_EnhA1	BCAR3
chr1	94187400	94189800	9_EnhA1	BCAR3	chr1	94187400	94189400	11_EnhWk	BCAR3
chr1	94235000	94238600	6_TxWk	BCAR3	chr1	94234800	94239000	14_ReprPCWk	BCAR3
chr1	94263800	94264800	11_EnhWk	BCAR3	chr1	94263400	94264600	9_EnhA1	BCAR3
chr1	94271000	94277000	15_NA	BCAR3	chr1	94272200	94276200	6_TxWk	BCAR3
chr1	94286600	94287600	9_EnhA1	BCAR3	chr1	94286600	94287400	11_EnhWk	BCAR3
chr1	94287800	94292800	6_TxWk	BCAR3	chr1	94287400	94293400	15_NA	BCAR3
chr1	94311800	94312706	1_TssA	BCAR3	chr1	94311200	94312706	3_TssFlnkU	BCAR3
chr1	94345400	94345474	10_EnhA2	DNTTIP2	chr1	94345400	94345474	9_EnhA1	DNTTIP2
chr1	94458393	94458800	6_TxWk	ABCA4	chr1	94458393	94459000	14_ReprPCWk	ABCA4
chr1	94462000	94467400	15_NA	ABCA4	chr1	94462000	94467800	14_ReprPCWk	ABCA4
chr1	94468800	94477600	15_NA	ABCA4	chr1	94468400	94478400	14_ReprPCWk	ABCA4
chr1	94478000	94479200	6_TxWk	ABCA4	chr1	94478400	94479400	11_EnhWk	ABCA4
chr1	94479400	94486000	15_NA	ABCA4	chr1	94479400	94486000	6_TxWk	ABCA4
chr1	94499800	94501600	6_TxWk	ABCA4	chr1	94500200	94502200	15_NA	ABCA4
chr1	94502400	94503200	9_EnhA1	ABCA4	chr1	94502200	94503000	10_EnhA2	ABCA4
chr1	94504000	94506800	9_EnhA1	ABCA4	chr1	94504400	94506800	11_EnhWk	ABCA4
chr1	94508800	94510600	10_EnhA2	ABCA4	chr1	94508200	94510600	11_EnhWk	ABCA4
chr1	94510600	94511200	9_EnhA1	ABCA4	chr1	94510600	94511400	6_TxWk	ABCA4
chr1	94513400	94514000	10_EnhA2	ABCA4	chr1	94513600	94514200	11_EnhWk	ABCA4
chr1	94520800	94521800	9_EnhA1	ABCA4	chr1	94520800	94521800	11_EnhWk	ABCA4
chr1	94554600	94559400	6_TxWk	ABCA4	chr1	94554600	94559000	14_ReprPCWk	ABCA4
chr1	94583800	94586688	15_NA	ABCA4	chr1	94583200	94586000	13_ReprPC	ABCA4
chr1	94679400	94696600	15_NA	ARHGAP29	chr1	94685600	94696200	6_TxWk	ARHGAP29
chr1	94885000	94885600	2_TssFlnk	ABCD3	chr1	94884800	94885600	4_TssFlnkD	ABCD3
chr1	95308600	95312000	14_ReprPCWk	SLC44A3	chr1	95307000	95311000	13_ReprPC	SLC44A3
chr1	95319600	95320200	9_EnhA1	SLC44A3	chr1	95319800	95320200	11_EnhWk	SLC44A3
chr1	95320200	95320600	3_TssFlnkU	SLC44A3	chr1	95320200	95320600	2_TssFlnk	SLC44A3
chr1	95344600	95348800	6_TxWk	SLC44A3	chr1	95344400	95349400	15_NA	SLC44A3
chr1	95358200	95359200	9_EnhA1	SLC44A3	chr1	95358000	95359400	7_EnhG1	SLC44A3
chr1	95359200	95360802	7_EnhG1	SLC44A3	chr1	95359400	95360802	5_Tx	SLC44A3
chr1	95370600	95374200	5_Tx	CNN3	chr1	95371000	95373400	7_EnhG1	CNN3
chr1	95441000	95444400	10_EnhA2	ALG14	chr1	95441400	95445200	6_TxWk	ALG14
chr1	95445400	95447000	9_EnhA1	ALG14	chr1	95445200	95446400	11_EnhWk	ALG14
chr1	95449800	95450800	9_EnhA1	ALG14	chr1	95449600	95450400	6_TxWk	ALG14
chr1	95479600	95479800	11_EnhWk	ALG14	chr1	95479600	95479800	9_EnhA1	ALG14
chr1	95490400	95491800	5_Tx	ALG14	chr1	95490200	95492400	6_TxWk	ALG14
chr1	95508400	95509000	10_EnhA2	ALG14	chr1	95508600	95509000	11_EnhWk	ALG14
chr1	95509000	95528200	6_TxWk	ALG14	chr1	95509000	95520800	15_NA	ALG14
chr1	95663200	95664400	9_EnhA1	TMEM56-RWDD3	chr1	95663400	95664200	11_EnhWk	TMEM56-RWDD3
chr1	97571600	97589000	6_TxWk	DPYD	chr1	97575200	97586600	15_NA	DPYD
chr1	97589600	97603600	15_NA	DPYD	chr1	97586800	97603800	6_TxWk	DPYD
chr1	97743600	97744200	11_EnhWk	DPYD	chr1	97743800	97744400	9_EnhA1	DPYD
chr1	97765000	97798400	15_NA	DPYD	chr1	97772800	97798800	6_TxWk	DPYD
chr1	97816400	97816600	11_EnhWk	DPYD	chr1	97816400	97816600	10_EnhA2	DPYD
chr1	97824400	97849200	15_NA	DPYD	chr1	97833400	97849400	6_TxWk	DPYD
chr1	98371600	98372200	10_EnhA2	DPYD	chr1	98371800	98372400	9_EnhA1	DPYD
chr1	98372400	98373400	10_EnhA2	DPYD	chr1	98372800	98373400	9_EnhA1	DPYD
chr1	98373400	98383800	15_NA	DPYD	chr1	98373600	98381800	6_TxWk	DPYD
chr1	98384800	98385000	2_TssFlnk	DPYD	chr1	98384800	98385000	4_TssFlnkD	DPYD
chr1	99455000	99455200	9_EnhA1	PLPPR5	chr1	99455000	99455200	11_EnhWk	PLPPR5
chr1	99458000	99463400	14_ReprPCWk	PLPPR5	chr1	99457600	99461600	15_NA	PLPPR5
chr1	99753000	99775146	14_ReprPCWk	PLPPR4	chr1	99753000	99775146	15_NA	PLPPR4
chr1	100127400	100128200	10_EnhA2	PALMD	chr1	100127000	100128000	9_EnhA1	PALMD
chr1	100137800	100139000	9_EnhA1	PALMD	chr1	100137800	100138800	11_EnhWk	PALMD
chr1	100139200	100140800	9_EnhA1	PALMD	chr1	100139800	100141200	11_EnhWk	PALMD
chr1	100141400	100142000	9_EnhA1	PALMD	chr1	100141200	100141800	10_EnhA2	PALMD
chr1	100146200	100147200	6_TxWk	PALMD	chr1	100145600	100147200	11_EnhWk	PALMD
chr1	100435345	100435400	4_TssFlnkD	SLC35A3	chr1	100435345	100435400	2_TssFlnk	SLC35A3
chr1	100435400	100435600	2_TssFlnk	SLC35A3	chr1	100435400	100435600	1_TssA	SLC35A3
chr1	100599400	100599800	2_TssFlnk	TRMT13	chr1	100599400	100600000	4_TssFlnkD	TRMT13
chr1	100755800	100758325	5_Tx	RTCA	chr1	100756800	100758325	6_TxWk	RTCA
chr1	101409400	101413600	6_TxWk	SLC30A7	chr1	101409600	101415000	5_Tx	SLC30A7
chr1	101444200	101447309	6_TxWk	SLC30A7	chr1	101445200	101447309	5_Tx	SLC30A7
chr1	101455179	101456000	9_EnhA1	DPH5	chr1	101455179	101455800	11_EnhWk	DPH5
chr1	101482400	101487000	5_Tx	DPH5	chr1	101479800	101486600	6_TxWk	DPH5
chr1	103345000	103345600	9_EnhA1	COL11A1	chr1	103344800	103345600	11_EnhWk	COL11A1
chr1	108479200	108479400	10_EnhA2	VAV3	chr1	108479200	108479400	4_TssFlnkD	VAV3
chr1	108479400	108480000	9_EnhA1	VAV3	chr1	108479400	108480200	11_EnhWk	VAV3
chr1	108506400	108507766	2_TssFlnk	VAV3	chr1	108506400	108507766	12_TssBiv	VAV3
chr1	108741200	108741400	2_TssFlnk	SLC25A24	chr1	108741200	108741400	4_TssFlnkD	SLC25A24
chr1	108784600	108786689	13_ReprPC	NBPF4	chr1	108783800	108786689	14_ReprPCWk	NBPF4
chr1	108923600	108926600	13_ReprPC	NBPF6	chr1	108922800	108927800	14_ReprPCWk	NBPF6
chr1	108929800	108932600	13_ReprPC	NBPF6	chr1	108929000	108932800	14_ReprPCWk	NBPF6
chr1	109102711	109103800	2_TssFlnk	FAM102B	chr1	109103000	109104000	4_TssFlnkD	FAM102B
chr1	109134400	109141200	15_NA	FAM102B	chr1	109134400	109138600	6_TxWk	FAM102B
chr1	109236000	109237400	2_TssFlnk	PRPF38B	chr1	109236200	109237400	4_TssFlnkD	PRPF38B
chr1	109263400	109264400	11_EnhWk	FNDC7	chr1	109263200	109264200	10_EnhA2	FNDC7
chr1	109358520	109359400	9_EnhA1	AKNAD1	chr1	109358800	109359800	3_TssFlnkU	AKNAD1
chr1	109359800	109360800	9_EnhA1	AKNAD1	chr1	109360000	109360800	11_EnhWk	AKNAD1
chr1	109385600	109394600	6_TxWk	AKNAD1	chr1	109384600	109394200	14_ReprPCWk	AKNAD1
chr1	109401000	109402000	9_EnhA1	AKNAD1	chr1	109400800	109402200	11_EnhWk	AKNAD1
chr1	109406400	109418800	15_NA	AKNAD1	chr1	109411200	109418800	14_ReprPCWk	AKNAD1
chr1	109417972	109418800	15_NA	GPSM2	chr1	109417972	109418800	14_ReprPCWk	GPSM2
chr1	109566200	109583200	6_TxWk	WDR47	chr1	109567800	109578800	15_NA	WDR47
chr1	109617400	109618000	2_TssFlnk	TAF13	chr1	109617200	109617800	4_TssFlnkD	TAF13
chr1	109634800	109635000	2_TssFlnk	TMEM167B	chr1	109634800	109635000	4_TssFlnkD	TMEM167B
chr1	109655400	109656479	13_ReprPC	C1orf194	chr1	109655000	109656479	12_TssBiv	C1orf194
chr1	109739800	109742000	9_EnhA1	KIAA1324	chr1	109740200	109742000	11_EnhWk	KIAA1324
chr1	109742000	109743000	11_EnhWk	KIAA1324	chr1	109742000	109743400	14_ReprPCWk	KIAA1324
chr1	109743400	109744200	10_EnhA2	KIAA1324	chr1	109743400	109744600	11_EnhWk	KIAA1324
chr1	109744800	109749401	15_NA	KIAA1324	chr1	109745600	109749401	14_ReprPCWk	KIAA1324
chr1	109758000	109758600	3_TssFlnkU	SARS	chr1	109757800	109758800	8_EnhG2	SARS
chr1	109768800	109769400	6_TxWk	SARS	chr1	109769000	109769600	7_EnhG1	SARS
chr1	109796400	109797000	9_EnhA1	CELSR2	chr1	109796200	109797200	11_EnhWk	CELSR2
chr1	109834987	109838000	6_TxWk	MYBPHL	chr1	109836000	109838400	14_ReprPCWk	MYBPHL
chr1	109848400	109849663	9_EnhA1	MYBPHL	chr1	109848400	109849663	11_EnhWk	MYBPHL
chr1	109852192	109854600	7_EnhG1	SORT1	chr1	109852600	109854400	6_TxWk	SORT1
chr1	109915400	109916000	10_EnhA2	SORT1	chr1	109915400	109916400	7_EnhG1	SORT1
chr1	109967400	109967800	2_TssFlnk	PSMA5	chr1	109967400	109968000	4_TssFlnkD	PSMA5
chr1	110026600	110027200	1_TssA	ATXN7L2	chr1	110026800	110027200	2_TssFlnk	ATXN7L2
chr1	110039800	110041600	10_EnhA2	CYB561D1	chr1	110039600	110041000	6_TxWk	CYB561D1
chr1	110041800	110042600	10_EnhA2	CYB561D1	chr1	110041600	110042800	11_EnhWk	CYB561D1
chr1	110043600	110045554	6_TxWk	CYB561D1	chr1	110042800	110045554	14_ReprPCWk	CYB561D1
chr1	110089000	110089200	10_EnhA2	GPR61	chr1	110089000	110089200	11_EnhWk	GPR61
chr1	110092000	110092400	2_TssFlnk	GNAI3	chr1	110092000	110092600	4_TssFlnkD	GNAI3
chr1	110122600	110123400	6_TxWk	GNAI3	chr1	110122800	110123800	5_Tx	GNAI3
chr1	110159400	110160600	9_EnhA1	AMPD2	chr1	110159400	110160800	11_EnhWk	AMPD2
chr1	110162200	110164000	1_TssA	AMPD2	chr1	110162200	110163400	3_TssFlnkU	AMPD2
chr1	110165000	110169200	6_TxWk	AMPD2	chr1	110164600	110168800	11_EnhWk	AMPD2
chr1	110220000	110229800	6_TxWk	GSTM2	chr1	110219400	110230200	15_NA	GSTM2
chr1	110272800	110274000	9_EnhA1	GSTM5	chr1	110273000	110273800	14_ReprPCWk	GSTM5
chr1	110274600	110276400	14_ReprPCWk	GSTM5	chr1	110273800	110276600	13_ReprPC	GSTM5
chr1	110530000	110530200	2_TssFlnk	AHCYL1	chr1	110530000	110530200	4_TssFlnkD	AHCYL1
chr1	110530200	110531000	6_TxWk	AHCYL1	chr1	110530200	110530800	11_EnhWk	AHCYL1
chr1	110544800	110546000	10_EnhA2	AHCYL1	chr1	110544800	110545600	7_EnhG1	AHCYL1
chr1	110719400	110720200	10_EnhA2	SLC6A17	chr1	110719000	110720000	11_EnhWk	SLC6A17
chr1	110729600	110732000	9_EnhA1	SLC6A17	chr1	110730000	110731600	11_EnhWk	SLC6A17
chr1	110757200	110758600	6_TxWk	KCNC4	chr1	110756800	110758200	14_ReprPCWk	KCNC4
chr1	110770200	110772000	7_EnhG1	KCNC4	chr1	110770200	110772400	6_TxWk	KCNC4
chr1	110781400	110783200	9_EnhA1	KCNC4	chr1	110781600	110783400	11_EnhWk	KCNC4
chr1	110800600	110801400	12_TssBiv	KCNC4	chr1	110800800	110801400	13_ReprPC	KCNC4
chr1	110801400	110802200	9_EnhA1	KCNC4	chr1	110801400	110802000	12_TssBiv	KCNC4
chr1	110883400	110885000	8_EnhG2	RBM15	chr1	110883600	110885800	7_EnhG1	RBM15
chr1	110886000	110887000	11_EnhWk	RBM15	chr1	110885800	110886600	6_TxWk	RBM15
chr1	110932800	110933000	9_EnhA1	SLC16A4	chr1	110932800	110933000	11_EnhWk	SLC16A4
chr1	110948800	110949000	6_TxWk	LAMTOR5	chr1	110948800	110949000	11_EnhWk	LAMTOR5
chr1	110949000	110949400	2_TssFlnk	LAMTOR5	chr1	110949000	110949600	4_TssFlnkD	LAMTOR5
chr1	111504800	111505600	2_TssFlnk	LRIF1	chr1	111505000	111505800	4_TssFlnkD	LRIF1
chr1	111678800	111680800	5_Tx	DRAM2	chr1	111679600	111680800	6_TxWk	DRAM2
chr1	111680800	111681600	6_TxWk	DRAM2	chr1	111680800	111681600	11_EnhWk	DRAM2
chr1	111743393	111746200	15_NA	CHI3L2	chr1	111743393	111745200	14_ReprPCWk	CHI3L2
chr1	111765600	111770400	15_NA	CHI3L2	chr1	111765800	111770000	6_TxWk	CHI3L2
chr1	111861800	111863188	14_ReprPCWk	CHIA	chr1	111861000	111863188	13_ReprPC	CHIA
chr1	112025970	112026600	6_TxWk	TMIGD3	chr1	112025970	112027000	14_ReprPCWk	TMIGD3
chr1	112108000	112112000	15_NA	RAP1A	chr1	112108400	112112400	14_ReprPCWk	RAP1A
chr1	112135000	112136200	9_EnhA1	RAP1A	chr1	112134600	112135800	11_EnhWk	RAP1A
chr1	112164000	112170800	15_NA	RAP1A	chr1	112165600	112170600	6_TxWk	RAP1A
chr1	112197200	112215200	15_NA	RAP1A	chr1	112204200	112220000	6_TxWk	RAP1A
chr1	112267800	112268400	9_EnhA1	INKA2	chr1	112267800	112268200	11_EnhWk	INKA2
chr1	112279600	112281000	3_TssFlnkU	INKA2	chr1	112279800	112281600	4_TssFlnkD	INKA2
chr1	112348800	112355600	14_ReprPCWk	KCND3	chr1	112349600	112359200	13_ReprPC	KCND3
chr1	112423400	112426400	9_EnhA1	KCND3	chr1	112423800	112426200	12_TssBiv	KCND3
chr1	112426600	112429200	6_TxWk	KCND3	chr1	112426400	112429600	14_ReprPCWk	KCND3
chr1	112429200	112430200	10_EnhA2	KCND3	chr1	112429600	112430600	13_ReprPC	KCND3
chr1	112430600	112431200	13_ReprPC	KCND3	chr1	112430600	112431400	14_ReprPCWk	KCND3
chr1	112462400	112463600	9_EnhA1	KCND3	chr1	112462600	112463600	11_EnhWk	KCND3
chr1	112520400	112521600	13_ReprPC	KCND3	chr1	112520400	112521200	14_ReprPCWk	KCND3
chr1	112940200	112941200	2_TssFlnk	CTTNBP2NL	chr1	112939600	112941200	4_TssFlnkD	CTTNBP2NL
chr1	112948600	112954000	6_TxWk	CTTNBP2NL	chr1	112947600	112953600	11_EnhWk	CTTNBP2NL
chr1	112954000	112954800	10_EnhA2	CTTNBP2NL	chr1	112953600	112954600	9_EnhA1	CTTNBP2NL
chr1	113009163	113009200	10_EnhA2	WNT2B	chr1	113009163	113009200	4_TssFlnkD	WNT2B
chr1	113044400	113045000	2_TssFlnk	WNT2B	chr1	113044400	113045000	4_TssFlnkD	WNT2B
chr1	113047200	113050600	13_ReprPC	WNT2B	chr1	113046600	113050400	14_ReprPCWk	WNT2B
chr1	113056000	113058200	6_TxWk	WNT2B	chr1	113056200	113058600	11_EnhWk	WNT2B
chr1	113075200	113077800	5_Tx	ST7L	chr1	113075400	113078600	6_TxWk	ST7L
chr1	113160400	113160600	10_EnhA2	ST7L	chr1	113160400	113160600	2_TssFlnk	ST7L
chr1	113163200	113163800	2_TssFlnk	CAPZA1	chr1	113163000	113163800	4_TssFlnkD	CAPZA1
chr1	113163800	113165000	6_TxWk	CAPZA1	chr1	113163800	113164600	11_EnhWk	CAPZA1
chr1	113252616	113256000	14_ReprPCWk	PPM1J	chr1	113252616	113256800	13_ReprPC	PPM1J
chr1	113266800	113269857	15_NA	FAM19A3	chr1	113266000	113269857	6_TxWk	FAM19A3
chr1	113616600	113617400	2_TssFlnk	LRIG2	chr1	113616800	113617400	4_TssFlnkD	LRIG2
chr1	113617400	113619600	6_TxWk	LRIG2	chr1	113617400	113619200	11_EnhWk	LRIG2
chr1	113622600	113625400	5_Tx	LRIG2	chr1	113623000	113625000	7_EnhG1	LRIG2
chr1	113933371	113935000	2_TssFlnk	MAGI3	chr1	113933600	113935000	4_TssFlnkD	MAGI3
chr1	114112200	114138400	15_NA	MAGI3	chr1	114100200	114138200	6_TxWk	MAGI3
chr1	114142000	114158000	6_TxWk	MAGI3	chr1	114144000	114159200	15_NA	MAGI3
chr1	114273800	114275400	6_TxWk	PHTF1	chr1	114273600	114275200	5_Tx	PHTF1
chr1	114275400	114277600	5_Tx	PHTF1	chr1	114275200	114276800	6_TxWk	PHTF1
chr1	114300200	114300800	2_TssFlnk	PHTF1	chr1	114300200	114300600	4_TssFlnkD	PHTF1
chr1	114352000	114353000	6_TxWk	RSBN1	chr1	114351800	114352800	11_EnhWk	RSBN1
chr1	114353000	114354200	2_TssFlnk	RSBN1	chr1	114352800	114354200	4_TssFlnkD	RSBN1
chr1	114441400	114442600	9_EnhA1	AP4B1	chr1	114441400	114442400	6_TxWk	AP4B1
chr1	114448600	114449000	2_TssFlnk	DCLRE1B	chr1	114448600	114449000	9_EnhA1	DCLRE1B
chr1	114631913	114636600	14_ReprPCWk	SYT6	chr1	114631913	114635800	13_ReprPC	SYT6
chr1	114637600	114646200	6_TxWk	SYT6	chr1	114640000	114646400	13_ReprPC	SYT6
chr1	114646600	114647400	9_EnhA1	SYT6	chr1	114646400	114647400	12_TssBiv	SYT6
chr1	114649200	114652600	14_ReprPCWk	SYT6	chr1	114648000	114651400	13_ReprPC	SYT6
chr1	114652600	114657000	6_TxWk	SYT6	chr1	114651800	114657400	13_ReprPC	SYT6
chr1	114657600	114665600	14_ReprPCWk	SYT6	chr1	114658600	114665000	13_ReprPC	SYT6
chr1	114666000	114675200	15_NA	SYT6	chr1	114665000	114672400	14_ReprPCWk	SYT6
chr1	114950800	114956200	5_Tx	TRIM33	chr1	114949800	114957200	6_TxWk	TRIM33
chr1	115000400	115002200	5_Tx	TRIM33	chr1	115000000	115001600	6_TxWk	TRIM33
chr1	115033800	115035000	10_EnhA2	TRIM33	chr1	115033000	115035000	6_TxWk	TRIM33
chr1	115048400	115050000	5_Tx	TRIM33	chr1	115048800	115050200	6_TxWk	TRIM33
chr1	115050000	115051000	6_TxWk	TRIM33	chr1	115050200	115051200	11_EnhWk	TRIM33
chr1	115051000	115053200	2_TssFlnk	TRIM33	chr1	115051200	115053200	4_TssFlnkD	TRIM33
chr1	115123400	115123800	2_TssFlnk	BCAS2	chr1	115123400	115123800	4_TssFlnkD	BCAS2
chr1	115141200	115153000	5_Tx	DENND2C	chr1	115137200	115150000	6_TxWk	DENND2C
chr1	115170000	115203000	6_TxWk	DENND2C	chr1	115168200	115211400	15_NA	DENND2C
chr1	115216000	115217400	13_ReprPC	AMPD1	chr1	115215719	115217200	14_ReprPCWk	AMPD1
chr1	115292600	115293600	9_EnhA1	CSDE1	chr1	115292800	115294000	11_EnhWk	CSDE1
chr1	115293600	115297600	10_EnhA2	CSDE1	chr1	115295000	115297600	11_EnhWk	CSDE1
chr1	115315600	115316800	5_Tx	SIKE1	chr1	115315600	115317200	6_TxWk	SIKE1
chr1	115321600	115322400	6_TxWk	SIKE1	chr1	115321600	115322200	11_EnhWk	SIKE1
chr1	115322400	115322800	2_TssFlnk	SIKE1	chr1	115322200	115322800	4_TssFlnkD	SIKE1
chr1	115432800	115435000	14_ReprPCWk	SYCP1	chr1	115433600	115435800	13_ReprPC	SYCP1
chr1	115572415	115576941	13_ReprPC	TSHB	chr1	115572415	115576941	14_ReprPCWk	TSHB
chr1	115605600	115607200	10_EnhA2	TSPAN2	chr1	115606200	115607800	11_EnhWk	TSPAN2
chr1	115609600	115613000	9_EnhA1	TSPAN2	chr1	115609400	115612800	11_EnhWk	TSPAN2
chr1	115613000	115615000	11_EnhWk	TSPAN2	chr1	115612800	115615200	14_ReprPCWk	TSPAN2
chr1	115615000	115616400	6_TxWk	TSPAN2	chr1	115615200	115616400	13_ReprPC	TSPAN2
chr1	115848200	115857200	15_NA	NGF	chr1	115845600	115855800	6_TxWk	NGF
chr1	115867600	115868400	6_TxWk	NGF	chr1	115867800	115868400	11_EnhWk	NGF
chr1	116196600	116198000	9_EnhA1	VANGL1	chr1	116196400	116197600	6_TxWk	VANGL1
chr1	116248400	116251400	6_TxWk	CASQ2	chr1	116247800	116250800	14_ReprPCWk	CASQ2
chr1	116279200	116289200	5_Tx	CASQ2	chr1	116282200	116288200	13_ReprPC	CASQ2
chr1	116294800	116295800	12_TssBiv	CASQ2	chr1	116295200	116296200	13_ReprPC	CASQ2
chr1	116299000	116299800	10_EnhA2	CASQ2	chr1	116299200	116299800	11_EnhWk	CASQ2
chr1	116306000	116306600	8_EnhG2	CASQ2	chr1	116306000	116306600	12_TssBiv	CASQ2
chr1	116519119	116520000	1_TssA	SLC22A15	chr1	116519119	116520000	2_TssFlnk	SLC22A15
chr1	116584000	116589000	6_TxWk	SLC22A15	chr1	116586000	116591000	5_Tx	SLC22A15
chr1	116657600	116659400	9_EnhA1	MAB21L3	chr1	116657600	116659200	11_EnhWk	MAB21L3
chr1	116661600	116665200	6_TxWk	MAB21L3	chr1	116659200	116665200	14_ReprPCWk	MAB21L3
chr1	116665400	116666000	9_EnhA1	MAB21L3	chr1	116665200	116666200	11_EnhWk	MAB21L3
chr1	116915290	116916200	1_TssA	ATP1A1	chr1	116915600	116916400	2_TssFlnk	ATP1A1
chr1	116915890	116916200	1_TssA	AL136376.1	chr1	116915890	116916400	2_TssFlnk	AL136376.1
chr1	117090400	117098800	15_NA	CD58	chr1	117086800	117098400	6_TxWk	CD58
chr1	117099400	117099800	10_EnhA2	CD58	chr1	117099400	117099800	11_EnhWk	CD58
chr1	117133400	117134000	10_EnhA2	IGSF3	chr1	117133200	117133800	14_ReprPCWk	IGSF3
chr1	117153800	117155600	13_ReprPC	IGSF3	chr1	117153600	117155200	14_ReprPCWk	IGSF3
chr1	117165600	117169600	13_ReprPC	IGSF3	chr1	117166400	117169200	14_ReprPCWk	IGSF3
chr1	117185600	117186800	9_EnhA1	IGSF3	chr1	117185800	117187000	12_TssBiv	IGSF3
chr1	117306000	117309400	10_EnhA2	CD2	chr1	117306600	117308800	6_TxWk	CD2
chr1	117452679	117452800	1_TssA	PTGFRN	chr1	117452679	117452800	2_TssFlnk	PTGFRN
chr1	117509200	117510200	10_EnhA2	PTGFRN	chr1	117509000	117509800	11_EnhWk	PTGFRN
chr1	117532400	117532800	11_EnhWk	PTGFRN	chr1	117532400	117532980	9_EnhA1	PTGFRN
chr1	117560200	117561400	9_EnhA1	CD101	chr1	117559800	117561200	11_EnhWk	CD101
chr1	117562400	117568800	6_TxWk	CD101	chr1	117564800	117569200	14_ReprPCWk	CD101
chr1	117603000	117603400	1_TssA	TTF2	chr1	117602925	117603400	2_TssFlnk	TTF2
chr1	117603400	117603600	2_TssFlnk	TTF2	chr1	117603400	117603600	4_TssFlnkD	TTF2
chr1	117686209	117688800	6_TxWk	VTCN1	chr1	117686209	117688800	15_NA	VTCN1
chr1	117689200	117691000	9_EnhA1	VTCN1	chr1	117689600	117691000	11_EnhWk	VTCN1
chr1	117705800	117720000	15_NA	VTCN1	chr1	117704200	117717000	14_ReprPCWk	VTCN1
chr1	117913200	117913600	1_TssA	MAN1A2	chr1	117913200	117913800	2_TssFlnk	MAN1A2
chr1	118046800	118049600	6_TxWk	MAN1A2	chr1	118046200	118049600	5_Tx	MAN1A2
chr1	118471000	118471600	2_TssFlnk	GDAP2	chr1	118470800	118471400	4_TssFlnkD	GDAP2
chr1	118510200	118511400	10_EnhA2	SPAG17	chr1	118510400	118511600	11_EnhWk	SPAG17
chr1	118515200	118522600	14_ReprPCWk	SPAG17	chr1	118517400	118523400	13_ReprPC	SPAG17
chr1	118575600	118607600	14_ReprPCWk	SPAG17	chr1	118584800	118604200	15_NA	SPAG17
chr1	118644400	118647000	14_ReprPCWk	SPAG17	chr1	118645400	118647600	13_ReprPC	SPAG17
chr1	118660400	118665000	14_ReprPCWk	SPAG17	chr1	118661400	118665200	6_TxWk	SPAG17
chr1	119473200	119474200	5_Tx	TBX15	chr1	119473400	119474000	6_TxWk	TBX15
chr1	119522800	119525600	6_TxWk	TBX15	chr1	119522600	119526800	10_EnhA2	TBX15
chr1	119527800	119528000	6_TxWk	TBX15	chr1	119527800	119528000	10_EnhA2	TBX15
chr1	119531200	119532179	14_ReprPCWk	TBX15	chr1	119531200	119532179	10_EnhA2	TBX15
chr1	119624800	119636200	15_NA	WARS2	chr1	119628200	119639400	6_TxWk	WARS2
chr1	119932400	119936753	13_ReprPC	HAO2	chr1	119931600	119935200	14_ReprPCWk	HAO2
chr1	120170000	120173600	14_ReprPCWk	ZNF697	chr1	120170200	120173600	6_TxWk	ZNF697
chr1	120218000	120218400	2_TssFlnk	PHGDH	chr1	120218000	120218400	3_TssFlnkU	PHGDH
chr1	120218400	120218800	12_TssBiv	PHGDH	chr1	120218400	120218800	10_EnhA2	PHGDH
chr1	120284600	120286600	7_EnhG1	PHGDH	chr1	120284800	120286400	11_EnhWk	PHGDH
chr1	120486800	120488800	6_TxWk	NOTCH2	chr1	120486800	120488000	5_Tx	NOTCH2
chr1	120555400	120557000	11_EnhWk	NOTCH2	chr1	120555600	120557800	9_EnhA1	NOTCH2
chr1	120562800	120566800	6_TxWk	NOTCH2	chr1	120562600	120566400	7_EnhG1	NOTCH2
chr1	120604400	120605200	3_TssFlnkU	NOTCH2	chr1	120604400	120605000	9_EnhA1	NOTCH2
chr1	120609200	120610800	3_TssFlnkU	NOTCH2	chr1	120609400	120610800	4_TssFlnkD	NOTCH2
chr1	120926979	120930200	14_ReprPCWk	FCGR1B	chr1	120926979	120929200	13_ReprPC	FCGR1B
chr1	143912000	143912400	4_TssFlnkD	FAM72D	chr1	143911800	143912400	11_EnhWk	FAM72D
chr1	144146808	144147000	10_EnhA2	NBPF20	chr1	144146808	144147000	6_TxWk	NBPF20
chr1	144150800	144151600	9_EnhA1	NBPF20	chr1	144150800	144151600	5_Tx	NBPF20
chr1	144491200	144492200	1_TssA	AL592284.1	chr1	144491600	144492400	2_TssFlnk	AL592284.1
chr1	144517600	144518800	14_ReprPCWk	AL592284.1	chr1	144517800	144519000	2_TssFlnk	AL592284.1
chr1	144886800	144888200	9_EnhA1	PDE4DIP	chr1	144886600	144888600	11_EnhWk	PDE4DIP
chr1	144924200	144928400	6_TxWk	PDE4DIP	chr1	144923400	144927200	7_EnhG1	PDE4DIP
chr1	144933200	144934400	7_EnhG1	PDE4DIP	chr1	144932800	144934000	9_EnhA1	PDE4DIP
chr1	144964600	144965800	9_EnhA1	PDE4DIP	chr1	144964200	144965800	11_EnhWk	PDE4DIP
chr1	144995600	144996800	9_EnhA1	PDE4DIP	chr1	144995400	144996800	7_EnhG1	PDE4DIP
chr1	145037400	145038600	8_EnhG2	PDE4DIP	chr1	145037800	145039000	4_TssFlnkD	PDE4DIP
chr1	145038800	145040200	1_TssA	PDE4DIP	chr1	145039000	145040400	3_TssFlnkU	PDE4DIP
chr1	145055600	145057200	6_TxWk	PDE4DIP	chr1	145055000	145057600	11_EnhWk	PDE4DIP
chr1	145076000	145076186	14_ReprPCWk	PDE4DIP	chr1	145076000	145076186	2_TssFlnk	PDE4DIP
chr1	145415600	145417000	5_Tx	HJV	chr1	145415400	145416800	13_ReprPC	HJV
chr1	145417000	145417545	6_TxWk	HJV	chr1	145416800	145417545	14_ReprPCWk	HJV
chr1	145458000	145459400	10_EnhA2	POLR3GL	chr1	145457400	145459200	11_EnhWk	POLR3GL
chr1	145459400	145460800	9_EnhA1	POLR3GL	chr1	145459600	145460600	11_EnhWk	POLR3GL
chr1	145472600	145473400	4_TssFlnkD	ANKRD34A	chr1	145472400	145473200	2_TssFlnk	ANKRD34A
chr1	145473400	145474000	2_TssFlnk	ANKRD34A	chr1	145473200	145474000	4_TssFlnkD	ANKRD34A
chr1	145517000	145517400	2_TssFlnk	PEX11B	chr1	145516800	145517400	4_TssFlnkD	PEX11B
chr1	145517600	145518000	6_TxWk	PEX11B	chr1	145517400	145518000	11_EnhWk	PEX11B
chr1	145524891	145525000	6_TxWk	ITGA10	chr1	145524891	145525000	11_EnhWk	ITGA10
chr1	145549230	145549600	2_TssFlnk	ANKRD35	chr1	145549230	145549600	4_TssFlnkD	ANKRD35
chr1	145563000	145563400	11_EnhWk	ANKRD35	chr1	145562800	145563400	4_TssFlnkD	ANKRD35
chr1	145563400	145568526	15_NA	ANKRD35	chr1	145564200	145568526	6_TxWk	ANKRD35
chr1	145576800	145577000	4_TssFlnkD	PIAS3	chr1	145576800	145577000	3_TssFlnkU	PIAS3
chr1	145577400	145578000	6_TxWk	PIAS3	chr1	145577200	145577800	7_EnhG1	PIAS3
chr1	145588800	145589400	1_TssA	NUDT17	chr1	145588800	145589200	4_TssFlnkD	NUDT17
chr1	145609600	145610200	2_TssFlnk	POLR3C	chr1	145609400	145610200	4_TssFlnkD	POLR3C
chr1	145621000	145621400	11_EnhWk	RNF115	chr1	145621000	145621600	9_EnhA1	RNF115
chr1	145650800	145651000	1_TssA	RNF115	chr1	145650800	145651000	2_TssFlnk	RNF115
chr1	145683800	145684000	7_EnhG1	RNF115	chr1	145683800	145684000	11_EnhWk	RNF115
chr1	145684000	145687400	5_Tx	RNF115	chr1	145684000	145686600	6_TxWk	RNF115
chr1	145714800	145715614	6_TxWk	CD160	chr1	145714600	145715614	15_NA	CD160
chr1	145739600	145743400	6_TxWk	PDZK1	chr1	145739200	145743200	14_ReprPCWk	PDZK1
chr1	145745400	145758200	6_TxWk	PDZK1	chr1	145745200	145757800	15_NA	PDZK1
chr1	146046200	146048400	7_EnhG1	NBPF11	chr1	146045200	146047800	6_TxWk	NBPF11
chr1	146052200	146054200	9_EnhA1	NBPF11	chr1	146052600	146054200	7_EnhG1	NBPF11
chr1	146054400	146056800	6_TxWk	NBPF11	chr1	146054200	146056000	5_Tx	NBPF11
chr1	146641400	146641800	3_TssFlnkU	PRKAB2	chr1	146641400	146641800	9_EnhA1	PRKAB2
chr1	146654000	146696600	6_TxWk	FMO5	chr1	146650200	146696600	15_NA	FMO5
chr1	146697600	146705800	15_NA	FMO5	chr1	146697600	146703000	14_ReprPCWk	FMO5
chr1	146737200	146743400	5_Tx	CHD1L	chr1	146737000	146742800	6_TxWk	CHD1L
chr1	147016600	147017400	10_EnhA2	BCL9	chr1	147016600	147017600	11_EnhWk	BCL9
chr1	147072200	147072800	2_TssFlnk	BCL9	chr1	147072400	147072800	4_TssFlnkD	BCL9
chr1	147083200	147084600	9_EnhA1	BCL9	chr1	147083000	147084200	11_EnhWk	BCL9
chr1	147233800	147234800	13_ReprPC	GJA5	chr1	147234000	147234800	14_ReprPCWk	GJA5
chr1	147400600	147401200	1_TssA	GPR89B	chr1	147400506	147401000	2_TssFlnk	GPR89B
chr1	147606600	147607600	7_EnhG1	NBPF24	chr1	147606000	147607600	6_TxWk	NBPF24
chr1	147610600	147616400	5_Tx	NBPF24	chr1	147611200	147615400	6_TxWk	NBPF24
chr1	147617800	147621600	5_Tx	NBPF24	chr1	147616400	147620800	6_TxWk	NBPF24
chr1	147621600	147623200	6_TxWk	NBPF24	chr1	147622200	147623200	11_EnhWk	NBPF24
chr1	147623200	147623600	2_TssFlnk	NBPF24	chr1	147623200	147623800	4_TssFlnkD	NBPF24
chr1	148340400	148341600	10_EnhA2	NBPF20	chr1	148339800	148341400	6_TxWk	NBPF20
chr1	148555979	148557200	1_TssA	NBPF15	chr1	148556400	148557400	3_TssFlnkU	NBPF15
chr1	148557400	148558200	6_TxWk	NBPF15	chr1	148557400	148558400	7_EnhG1	NBPF15
chr1	148742800	148743800	9_EnhA1	NBPF16	chr1	148742600	148743600	6_TxWk	NBPF16
chr1	149400131	149400542	2_TssFlnk	HIST2H3PS2	chr1	149400131	149400542	3_TssFlnkU	HIST2H3PS2
chr1	149783400	149783800	1_TssA	HIST2H2BF	chr1	149783200	149783800	4_TssFlnkD	HIST2H2BF
chr1	149783800	149783928	2_TssFlnk	HIST2H2BF	chr1	149783800	149783928	1_TssA	HIST2H2BF
chr1	149784826	149785236	2_TssFlnk	HIST2H3D	chr1	149784826	149785200	4_TssFlnkD	HIST2H3D
chr1	149805200	149806200	2_TssFlnk	HIST2H4A	chr1	149805200	149806000	11_EnhWk	HIST2H4A
chr1	149811600	149812765	2_TssFlnk	HIST2H3C	chr1	149812000	149812765	4_TssFlnkD	HIST2H3C
chr1	149822643	149823191	1_TssA	HIST2H2AA3	chr1	149822800	149823191	3_TssFlnkU	HIST2H2AA3
chr1	149825200	149825836	6_TxWk	HIST2H3A	chr1	149824800	149825800	11_EnhWk	HIST2H3A
chr1	149831400	149832400	2_TssFlnk	HIST2H4B	chr1	149831000	149832200	4_TssFlnkD	HIST2H4B
chr1	149832400	149832714	1_TssA	HIST2H4B	chr1	149832200	149832714	3_TssFlnkU	HIST2H4B
chr1	149859019	149859466	1_TssA	HIST2H2AB	chr1	149859019	149859400	3_TssFlnkU	HIST2H2AB
chr1	149898800	149899000	2_TssFlnk	SF3B4	chr1	149898800	149899000	3_TssFlnkU	SF3B4
chr1	149900600	149902800	9_EnhA1	MTMR11	chr1	149900600	149902200	11_EnhWk	MTMR11
chr1	149973200	149974000	9_EnhA1	OTUD7B	chr1	149973200	149974000	11_EnhWk	OTUD7B
chr1	149974800	149976600	6_TxWk	OTUD7B	chr1	149975200	149976400	11_EnhWk	OTUD7B
chr1	149976600	149978600	5_Tx	OTUD7B	chr1	149976400	149978800	6_TxWk	OTUD7B
chr1	150040400	150041000	2_TssFlnk	VPS45	chr1	150040600	150041200	4_TssFlnkD	VPS45
chr1	150117000	150117505	11_EnhWk	VPS45	chr1	150117000	150117505	5_Tx	VPS45
chr1	150136200	150136916	6_TxWk	PLEKHO1	chr1	150136200	150136916	15_NA	PLEKHO1
chr1	150242000	150244000	15_NA	C1orf54	chr1	150242000	150244200	6_TxWk	C1orf54
chr1	150244000	150245400	10_EnhA2	C1orf54	chr1	150244200	150246200	11_EnhWk	C1orf54
chr1	150254953	150255600	2_TssFlnk	CIART	chr1	150255000	150255600	4_TssFlnkD	CIART
chr1	150255600	150259505	6_TxWk	CIART	chr1	150255800	150259505	15_NA	CIART
chr1	150266289	150267000	1_TssA	MRPS21	chr1	150266289	150267200	3_TssFlnkU	MRPS21
chr1	150267200	150268800	6_TxWk	MRPS21	chr1	150267200	150268600	7_EnhG1	MRPS21
chr1	150294600	150295200	2_TssFlnk	PRPF3	chr1	150294600	150295200	4_TssFlnkD	PRPF3
chr1	150335600	150335800	3_TssFlnkU	RPRD2	chr1	150335567	150335800	9_EnhA1	RPRD2
chr1	150338600	150339400	2_TssFlnk	RPRD2	chr1	150338400	150339600	4_TssFlnkD	RPRD2
chr1	150431000	150434000	6_TxWk	RPRD2	chr1	150429400	150433400	5_Tx	RPRD2
chr1	150480538	150480600	7_EnhG1	ECM1	chr1	150480538	150480600	11_EnhWk	ECM1
chr1	150531400	150532600	6_TxWk	ADAMTSL4	chr1	150531600	150533000	11_EnhWk	ADAMTSL4
chr1	150533000	150533400	9_EnhA1	ADAMTSL4	chr1	150533000	150533400	4_TssFlnkD	ADAMTSL4
chr1	150533400	150533413	3_TssFlnkU	ADAMTSL4	chr1	150533400	150533413	1_TssA	ADAMTSL4
chr1	150573327	150576400	6_TxWk	ENSA	chr1	150573327	150576400	15_NA	ENSA
chr1	150583600	150584200	9_EnhA1	ENSA	chr1	150583600	150584200	11_EnhWk	ENSA
chr1	150587000	150588000	6_TxWk	ENSA	chr1	150586600	150588000	10_EnhA2	ENSA
chr1	150600000	150600200	7_EnhG1	ENSA	chr1	150600000	150600200	6_TxWk	ENSA
chr1	150702672	150718400	15_NA	CTSS	chr1	150706000	150722800	14_ReprPCWk	CTSS
chr1	150718600	150737000	6_TxWk	CTSS	chr1	150722800	150736800	15_NA	CTSS
chr1	150832000	150834200	5_Tx	ARNT	chr1	150831000	150834000	6_TxWk	ARNT
chr1	150899800	150900000	11_EnhWk	SETDB1	chr1	150899800	150900000	8_EnhG2	SETDB1
chr1	150945600	150946400	2_TssFlnk	CERS2	chr1	150945800	150946400	4_TssFlnkD	CERS2
chr1	150962200	150968110	15_NA	ANXA9	chr1	150962000	150967200	14_ReprPCWk	ANXA9
chr1	150978800	150979600	1_TssA	MINDY1	chr1	150978800	150979600	3_TssFlnkU	MINDY1
chr1	150979600	150979800	10_EnhA2	MINDY1	chr1	150979600	150979800	9_EnhA1	MINDY1
chr1	150980600	150980800	3_TssFlnkU	MINDY1	chr1	150980600	150980851	2_TssFlnk	MINDY1
chr1	150982800	150985000	9_EnhA1	PRUNE1	chr1	150982600	150984600	11_EnhWk	PRUNE1
chr1	150996200	150997000	7_EnhG1	PRUNE1	chr1	150996000	150997200	11_EnhWk	PRUNE1
chr1	150997000	150997800	9_EnhA1	PRUNE1	chr1	150997200	150997800	6_TxWk	PRUNE1
chr1	151020216	151020800	1_TssA	C1orf56	chr1	151020400	151021000	3_TssFlnkU	C1orf56
chr1	151029600	151030000	5_Tx	CDC42SE1	chr1	151029400	151030000	8_EnhG2	CDC42SE1
chr1	151030000	151030400	2_TssFlnk	CDC42SE1	chr1	151030000	151030400	4_TssFlnkD	CDC42SE1
chr1	151030234	151030400	2_TssFlnk	MLLT11	chr1	151030234	151030400	4_TssFlnkD	MLLT11
chr1	151042400	151042800	10_EnhA2	CDC42SE1	chr1	151042400	151042800	9_EnhA1	CDC42SE1
chr1	151042800	151042801	1_TssA	CDC42SE1	chr1	151042800	151042801	3_TssFlnkU	CDC42SE1
chr1	151044200	151044600	11_EnhWk	GABPB2	chr1	151044000	151044600	9_EnhA1	GABPB2
chr1	151116400	151117000	1_TssA	SEMA6C	chr1	151116000	151117000	10_EnhA2	SEMA6C
chr1	151148600	151148760	11_EnhWk	TMOD4	chr1	151148600	151148760	5_Tx	TMOD4
chr1	151148600	151148800	11_EnhWk	TMOD4	chr1	151148600	151148760	5_Tx	TMOD4
chr1	151160200	151161000	6_TxWk	VPS72	chr1	151160400	151161000	9_EnhA1	VPS72
chr1	151161400	151161800	2_TssFlnk	VPS72	chr1	151161400	151162000	4_TssFlnkD	VPS72
chr1	151170425	151170600	9_EnhA1	PIP5K1A	chr1	151170425	151170600	3_TssFlnkU	PIP5K1A
chr1	151185400	151189600	6_TxWk	PIP5K1A	chr1	151186200	151188800	5_Tx	PIP5K1A
chr1	151253400	151253800	2_TssFlnk	ZNF687-AS1	chr1	151253400	151253800	4_TssFlnkD	ZNF687-AS1
chr1	151255200	151255600	2_TssFlnk	ZNF687	chr1	151255200	151255800	3_TssFlnkU	ZNF687
chr1	151255800	151256400	2_TssFlnk	ZNF687	chr1	151255800	151256400	4_TssFlnkD	ZNF687
chr1	151264800	151266200	7_EnhG1	PI4KB	chr1	151264273	151266000	6_TxWk	PI4KB
chr1	151281800	151285000	9_EnhA1	PI4KB	chr1	151282000	151284200	11_EnhWk	PI4KB
chr1	151297800	151298200	11_EnhWk	PI4KB	chr1	151297800	151298200	7_EnhG1	PI4KB
chr1	151483200	151484400	2_TssFlnk	CGN	chr1	151483000	151484600	12_TssBiv	CGN
chr1	151502200	151509000	15_NA	CGN	chr1	151503800	151508800	14_ReprPCWk	CGN
chr1	151509200	151510600	9_EnhA1	CGN	chr1	151508800	151510400	11_EnhWk	CGN
chr1	151514200	151515800	3_TssFlnkU	TUFT1	chr1	151514200	151515800	4_TssFlnkD	TUFT1
chr1	151516200	151518200	7_EnhG1	TUFT1	chr1	151515800	151518400	6_TxWk	TUFT1
chr1	151518200	151520800	9_EnhA1	TUFT1	chr1	151518400	151520000	11_EnhWk	TUFT1
chr1	151556000	151556059	9_EnhA1	TUFT1	chr1	151556000	151556059	7_EnhG1	TUFT1
chr1	151586200	151586400	11_EnhWk	SNX27	chr1	151586200	151586400	4_TssFlnkD	SNX27
chr1	151665000	151671567	5_Tx	SNX27	chr1	151667200	151671567	6_TxWk	SNX27
chr1	151677000	151677200	9_EnhA1	CELF3	chr1	151677000	151677200	11_EnhWk	CELF3
chr1	151677600	151678600	10_EnhA2	CELF3	chr1	151677200	151678600	6_TxWk	CELF3
chr1	151736800	151743808	14_ReprPCWk	OAZ3	chr1	151737000	151741600	15_NA	OAZ3
chr1	151762400	151763200	2_TssFlnk	TDRKH	chr1	151762400	151763000	4_TssFlnkD	TDRKH
chr1	151763200	151763800	1_TssA	TDRKH	chr1	151763400	151763892	4_TssFlnkD	TDRKH
chr1	151783400	151784600	9_EnhA1	RORC	chr1	151783200	151784200	11_EnhWk	RORC
chr1	151784800	151786600	14_ReprPCWk	RORC	chr1	151785000	151786400	13_ReprPC	RORC
chr1	151789600	151795600	14_ReprPCWk	RORC	chr1	151787000	151794600	13_ReprPC	RORC
chr1	151812200	151813000	14_ReprPCWk	C2CD4D	chr1	151812000	151813033	13_ReprPC	C2CD4D
chr1	151819739	151820800	14_ReprPCWk	THEM5	chr1	151819739	151821000	13_ReprPC	THEM5
chr1	151820800	151821600	11_EnhWk	THEM5	chr1	151821000	151821600	12_TssBiv	THEM5
chr1	151955391	151956200	6_TxWk	S100A10	chr1	151955391	151956400	5_Tx	S100A10
chr1	151956600	151957400	9_EnhA1	S100A10	chr1	151956400	151957600	7_EnhG1	S100A10
chr1	151964600	151965400	3_TssFlnkU	S100A10	chr1	151964400	151965200	4_TssFlnkD	S100A10
chr1	151965400	151966000	1_TssA	S100A10	chr1	151965200	151966000	3_TssFlnkU	S100A10
chr1	151966000	151966400	2_TssFlnk	S100A10	chr1	151966000	151966600	1_TssA	S100A10
chr1	152004982	152006800	5_Tx	S100A11	chr1	152005400	152006800	7_EnhG1	S100A11
chr1	152006800	152007600	8_EnhG2	S100A11	chr1	152007000	152007600	4_TssFlnkD	S100A11
chr1	152007600	152009800	1_TssA	S100A11	chr1	152007800	152009200	3_TssFlnkU	S100A11
chr1	152019800	152020383	3_TssFlnkU	S100A11	chr1	152019600	152020383	9_EnhA1	S100A11
chr1	152080800	152081600	10_EnhA2	TCHH	chr1	152081000	152081600	13_ReprPC	TCHH
chr1	152126071	152127600	14_ReprPCWk	RPTN	chr1	152126071	152127400	13_ReprPC	RPTN
chr1	152127600	152131600	6_TxWk	RPTN	chr1	152127400	152131704	14_ReprPCWk	RPTN
chr1	152595310	152595579	6_TxWk	LCE3A	chr1	152595400	152595579	11_EnhWk	LCE3A
chr1	152648000	152649050	13_ReprPC	LCE2C	chr1	152647771	152649050	14_ReprPCWk	LCE2C
chr1	152648000	152650000	13_ReprPC	LCE2B	chr1	152647771	152651000	14_ReprPCWk	LCE2B
chr1	152691998	152692905	13_ReprPC	C1orf68	chr1	152691998	152692600	14_ReprPCWk	C1orf68
chr1	152730506	152730800	4_TssFlnkD	KPRP	chr1	152730506	152730800	11_EnhWk	KPRP
chr1	152732800	152734529	14_ReprPCWk	KPRP	chr1	152732200	152734529	15_NA	KPRP
chr1	152749000	152749445	14_ReprPCWk	LCE1F	chr1	152748848	152749445	15_NA	LCE1F
chr1	152777311	152779107	14_ReprPCWk	LCE1C	chr1	152777311	152779000	13_ReprPC	LCE1C
chr1	152815344	152816459	13_ReprPC	LCE6A	chr1	152815344	152816459	14_ReprPCWk	LCE6A
chr1	152850793	152857523	14_ReprPCWk	SMCP	chr1	152850793	152857523	15_NA	SMCP
chr1	152881021	152883600	14_ReprPCWk	IVL	chr1	152881600	152883400	13_ReprPC	IVL
chr1	152883600	152884200	13_ReprPC	IVL	chr1	152883400	152884362	14_ReprPCWk	IVL
chr1	152943142	152945050	14_ReprPCWk	SPRR4	chr1	152943142	152945050	15_NA	SPRR4
chr1	152956557	152958289	14_ReprPCWk	SPRR1A	chr1	152956557	152958289	15_NA	SPRR1A
chr1	152974223	152976332	14_ReprPCWk	SPRR3	chr1	152974223	152976332	15_NA	SPRR3
chr1	153003678	153005376	14_ReprPCWk	SPRR1B	chr1	153003678	153005376	15_NA	SPRR1B
chr1	153012201	153014407	14_ReprPCWk	SPRR2D	chr1	153012201	153014407	15_NA	SPRR2D
chr1	153028589	153030013	14_ReprPCWk	SPRR2A	chr1	153028589	153030013	15_NA	SPRR2A
chr1	153122058	153123345	14_ReprPCWk	SPRR2G	chr1	153122058	153123345	15_NA	SPRR2G
chr1	153332000	153333503	14_ReprPCWk	S100A9	chr1	153332400	153333503	13_ReprPC	S100A9
chr1	153409534	153412425	14_ReprPCWk	S100A7L2	chr1	153409800	153411800	13_ReprPC	S100A7L2
chr1	153521400	153522600	9_EnhA1	S100A4	chr1	153521800	153522612	11_EnhWk	S100A4
chr1	153533584	153537400	6_TxWk	S100A2	chr1	153533584	153536000	15_NA	S100A2
chr1	153537400	153538000	10_EnhA2	S100A2	chr1	153537200	153537800	6_TxWk	S100A2
chr1	153579362	153580200	5_Tx	S100A16	chr1	153579362	153580600	7_EnhG1	S100A16
chr1	153583800	153584200	3_TssFlnkU	S100A16	chr1	153583800	153584200	4_TssFlnkD	S100A16
chr1	153607200	153608000	2_TssFlnk	CHTOP	chr1	153607400	153608200	3_TssFlnkU	CHTOP
chr1	153631800	153632000	2_TssFlnk	SNAPIN	chr1	153631800	153632000	4_TssFlnkD	SNAPIN
chr1	153660400	153663600	14_ReprPCWk	NPR1	chr1	153661400	153664200	13_ReprPC	NPR1
chr1	153746830	153747600	6_TxWk	SLC27A3	chr1	153746830	153747800	11_EnhWk	SLC27A3
chr1	153747600	153748400	2_TssFlnk	SLC27A3	chr1	153747800	153748600	4_TssFlnkD	SLC27A3
chr1	153749800	153752633	15_NA	SLC27A3	chr1	153749000	153752633	14_ReprPCWk	SLC27A3
chr1	153777201	153777600	10_EnhA2	GATAD2B	chr1	153777201	153777600	6_TxWk	GATAD2B
chr1	153777600	153778400	9_EnhA1	GATAD2B	chr1	153777600	153778400	11_EnhWk	GATAD2B
chr1	153798000	153798600	6_TxWk	GATAD2B	chr1	153797800	153798400	11_EnhWk	GATAD2B
chr1	153853600	153853800	9_EnhA1	GATAD2B	chr1	153853600	153853800	11_EnhWk	GATAD2B
chr1	153853800	153854600	3_TssFlnkU	GATAD2B	chr1	153853800	153854400	4_TssFlnkD	GATAD2B
chr1	153918400	153919172	2_TssFlnk	DENND4B	chr1	153918200	153919000	1_TssA	DENND4B
chr1	153931600	153932000	6_TxWk	SLC39A1	chr1	153931600	153932000	11_EnhWk	SLC39A1
chr1	153934000	153935000	6_TxWk	SLC39A1	chr1	153934200	153934800	11_EnhWk	SLC39A1
chr1	153940010	153940600	1_TssA	CREB3L4	chr1	153940010	153940400	2_TssFlnk	CREB3L4
chr1	153948600	153948800	7_EnhG1	JTB	chr1	153948600	153948800	8_EnhG2	JTB
chr1	153957800	153958834	2_TssFlnk	RAB13	chr1	153958000	153958834	1_TssA	RAB13
chr1	153964600	153964626	5_Tx	RPS27	chr1	153964600	153964626	8_EnhG2	RPS27
chr1	153965161	153968600	5_Tx	NUP210L	chr1	153965200	153967800	7_EnhG1	NUP210L
chr1	154115000	154121600	6_TxWk	NUP210L	chr1	154112800	154122000	15_NA	NUP210L
chr1	154157800	154158600	10_EnhA2	TPM3	chr1	154157400	154158400	6_TxWk	TPM3
chr1	154191400	154191600	7_EnhG1	C1orf43	chr1	154191400	154191600	8_EnhG2	C1orf43
chr1	154195400	154196000	6_TxWk	UBAP2L	chr1	154195600	154196000	11_EnhWk	UBAP2L
chr1	154196800	154197600	6_TxWk	UBAP2L	chr1	154197000	154197600	11_EnhWk	UBAP2L
chr1	154245600	154246200	2_TssFlnk	HAX1	chr1	154245600	154246000	4_TssFlnkD	HAX1
chr1	154301000	154301600	2_TssFlnk	ATP8B2	chr1	154300600	154301600	4_TssFlnkD	ATP8B2
chr1	154378200	154379400	3_TssFlnkU	IL6R	chr1	154377669	154379000	4_TssFlnkD	IL6R
chr1	154387600	154391800	14_ReprPCWk	IL6R	chr1	154387600	154391200	6_TxWk	IL6R
chr1	154392800	154396200	6_TxWk	IL6R	chr1	154392800	154396800	11_EnhWk	IL6R
chr1	154410000	154414600	13_ReprPC	IL6R	chr1	154409800	154413600	14_ReprPCWk	IL6R
chr1	154414600	154415200	12_TssBiv	IL6R	chr1	154414400	154415000	11_EnhWk	IL6R
chr1	154415200	154416800	13_ReprPC	IL6R	chr1	154415000	154417600	14_ReprPCWk	IL6R
chr1	154426000	154427000	14_ReprPCWk	IL6R	chr1	154425600	154426600	11_EnhWk	IL6R
chr1	154427000	154431400	13_ReprPC	IL6R	chr1	154426600	154430200	14_ReprPCWk	IL6R
chr1	154431400	154435000	14_ReprPCWk	IL6R	chr1	154430200	154435600	15_NA	IL6R
chr1	154456600	154458200	13_ReprPC	SHE	chr1	154456400	154458400	14_ReprPCWk	SHE
chr1	154529000	154530000	3_TssFlnkU	UBE2Q1	chr1	154529000	154530600	4_TssFlnkD	UBE2Q1
chr1	154581600	154581800	9_EnhA1	ADAR	chr1	154581600	154581800	4_TssFlnkD	ADAR
chr1	154596800	154598200	9_EnhA1	ADAR	chr1	154597000	154599000	11_EnhWk	ADAR
chr1	154599000	154599200	9_EnhA1	ADAR	chr1	154599000	154599200	4_TssFlnkD	ADAR
chr1	154686200	154688200	6_TxWk	KCNN3	chr1	154686400	154689200	14_ReprPCWk	KCNN3
chr1	154689400	154691600	6_TxWk	KCNN3	chr1	154689200	154692200	13_ReprPC	KCNN3
chr1	154691600	154693800	5_Tx	KCNN3	chr1	154692200	154694000	14_ReprPCWk	KCNN3
chr1	154699000	154704000	9_EnhA1	KCNN3	chr1	154698600	154703800	11_EnhWk	KCNN3
chr1	154710000	154713600	6_TxWk	KCNN3	chr1	154710800	154713200	13_ReprPC	KCNN3
chr1	154722400	154723600	6_TxWk	KCNN3	chr1	154722800	154724000	13_ReprPC	KCNN3
chr1	154724200	154724800	6_TxWk	KCNN3	chr1	154724000	154725000	14_ReprPCWk	KCNN3
chr1	154724800	154727400	5_Tx	KCNN3	chr1	154725000	154728200	13_ReprPC	KCNN3
chr1	154739800	154741000	9_EnhA1	KCNN3	chr1	154740000	154741000	11_EnhWk	KCNN3
chr1	154741400	154742000	6_TxWk	KCNN3	chr1	154741000	154742000	13_ReprPC	KCNN3
chr1	154763800	154764400	11_EnhWk	KCNN3	chr1	154763400	154764400	14_ReprPCWk	KCNN3
chr1	154773600	154776600	9_EnhA1	KCNN3	chr1	154773000	154776600	12_TssBiv	KCNN3
chr1	154779600	154781000	11_EnhWk	KCNN3	chr1	154779400	154781200	12_TssBiv	KCNN3
chr1	154781000	154783000	9_EnhA1	KCNN3	chr1	154781200	154782800	11_EnhWk	KCNN3
chr1	154790800	154794600	5_Tx	KCNN3	chr1	154790800	154793600	6_TxWk	KCNN3
chr1	154801200	154810000	6_TxWk	KCNN3	chr1	154798800	154809600	13_ReprPC	KCNN3
chr1	154811000	154812000	11_EnhWk	KCNN3	chr1	154810600	154811600	13_ReprPC	KCNN3
chr1	154838000	154838400	10_EnhA2	KCNN3	chr1	154837800	154838400	13_ReprPC	KCNN3
chr1	154908400	154908800	2_TssFlnk	PMVK	chr1	154908200	154908800	4_TssFlnkD	PMVK
chr1	154924600	154925000	10_EnhA2	PBXIP1	chr1	154924400	154925000	11_EnhWk	PBXIP1
chr1	154927200	154928400	3_TssFlnkU	PBXIP1	chr1	154927200	154928200	4_TssFlnkD	PBXIP1
chr1	154930800	154931400	7_EnhG1	PYGO2	chr1	154931000	154931400	6_TxWk	PYGO2
chr1	154933200	154934000	2_TssFlnk	PYGO2	chr1	154933200	154933800	3_TssFlnkU	PYGO2
chr1	154942000	154943800	1_TssA	SHC1	chr1	154942400	154943800	3_TssFlnkU	SHC1
chr1	154990400	154990998	6_TxWk	ZBTB7B	chr1	154990200	154990998	11_EnhWk	ZBTB7B
chr1	154992000	154999800	15_NA	DCST2	chr1	154995000	155000600	14_ReprPCWk	DCST2
chr1	155103800	155106600	14_ReprPCWk	EFNA1	chr1	155103000	155107000	6_TxWk	EFNA1
chr1	155107000	155107200	9_EnhA1	EFNA1	chr1	155107000	155107200	11_EnhWk	EFNA1
chr1	155107200	155107333	3_TssFlnkU	EFNA1	chr1	155107200	155107333	9_EnhA1	EFNA1
chr1	155110000	155111329	5_Tx	SLC50A1	chr1	155109600	155111329	6_TxWk	SLC50A1
chr1	155112400	155113000	1_TssA	DPM3	chr1	155112367	155112800	3_TssFlnkU	DPM3
chr1	155157000	155158000	10_EnhA2	RP11-201K10.3	chr1	155157200	155158200	11_EnhWk	RP11-201K10.3
chr1	155158400	155162200	6_TxWk	MUC1	chr1	155159800	155162707	14_ReprPCWk	MUC1
chr1	155175800	155176600	10_EnhA2	THBS3	chr1	155175800	155177000	11_EnhWk	THBS3
chr1	155178400	155178842	1_TssA	MTX1	chr1	155178490	155178800	3_TssFlnkU	MTX1
chr1	155210400	155211200	2_TssFlnk	GBA	chr1	155210600	155211200	4_TssFlnkD	GBA
chr1	155225770	155225800	1_TssA	SCAMP3	chr1	155225770	155225800	3_TssFlnkU	SCAMP3
chr1	155231000	155231400	4_TssFlnkD	SCAMP3	chr1	155231000	155231400	3_TssFlnkU	SCAMP3
chr1	155232659	155232800	10_EnhA2	CLK2	chr1	155232659	155232800	9_EnhA1	CLK2
chr1	155232800	155233000	6_TxWk	CLK2	chr1	155232800	155233000	7_EnhG1	CLK2
chr1	155242000	155242400	4_TssFlnkD	CLK2	chr1	155242000	155242400	3_TssFlnkU	CLK2
chr1	155243600	155243800	4_TssFlnkD	CLK2	chr1	155243600	155243800	3_TssFlnkU	CLK2
chr1	155243800	155244000	2_TssFlnk	CLK2	chr1	155243800	155244000	9_EnhA1	CLK2
chr1	155248200	155248282	6_TxWk	CLK2	chr1	155248200	155248282	15_NA	CLK2
chr1	155248200	155259639	6_TxWk	HCN3	chr1	155248200	155255400	15_NA	HCN3
chr1	155290400	155290457	8_EnhG2	FDPS	chr1	155290400	155290457	4_TssFlnkD	FDPS
chr1	155290687	155291000	2_TssFlnk	RUSC1	chr1	155290687	155291200	4_TssFlnkD	RUSC1
chr1	155291000	155292200	6_TxWk	RUSC1	chr1	155291200	155292200	11_EnhWk	RUSC1
chr1	155295400	155299000	6_TxWk	RUSC1	chr1	155296200	155299600	7_EnhG1	RUSC1
chr1	155366200	155367000	10_EnhA2	ASH1L	chr1	155366400	155367000	11_EnhWk	ASH1L
chr1	155417400	155421200	6_TxWk	ASH1L	chr1	155416800	155422000	5_Tx	ASH1L
chr1	155433600	155435600	10_EnhA2	ASH1L	chr1	155433400	155435600	11_EnhWk	ASH1L
chr1	155580200	155581000	1_TssA	MSTO1	chr1	155580400	155581200	4_TssFlnkD	MSTO1
chr1	155615600	155616000	11_EnhWk	MSTO1	chr1	155615600	155616000	9_EnhA1	MSTO1
chr1	155616000	155618000	6_TxWk	MSTO1	chr1	155616000	155618000	11_EnhWk	MSTO1
chr1	155618000	155619000	9_EnhA1	MSTO1	chr1	155618400	155619400	11_EnhWk	MSTO1
chr1	155622000	155628000	6_TxWk	MSTO1	chr1	155622000	155625600	14_ReprPCWk	MSTO1
chr1	155717000	155718000	5_Tx	MSTO1	chr1	155717000	155718153	7_EnhG1	MSTO1
chr1	155826200	155826400	2_TssFlnk	GON4L	chr1	155826200	155826400	4_TssFlnkD	GON4L
chr1	155827400	155828400	6_TxWk	GON4L	chr1	155827400	155828600	10_EnhA2	GON4L
chr1	155829300	155830800	1_TssA	SYT11	chr1	155829600	155830800	3_TssFlnkU	SYT11
chr1	155830800	155831400	10_EnhA2	SYT11	chr1	155830800	155831200	9_EnhA1	SYT11
chr1	155834200	155834800	9_EnhA1	SYT11	chr1	155834000	155834600	11_EnhWk	SYT11
chr1	155840800	155841600	9_EnhA1	SYT11	chr1	155841000	155841800	11_EnhWk	SYT11
chr1	155853400	155854800	9_EnhA1	SYT11	chr1	155853200	155854800	11_EnhWk	SYT11
chr1	155903200	155903600	2_TssFlnk	KHDC4	chr1	155903200	155903600	8_EnhG2	KHDC4
chr1	155911600	155912625	6_TxWk	RXFP4	chr1	155911480	155912400	11_EnhWk	RXFP4
chr1	155953200	155954000	9_EnhA1	ARHGEF2	chr1	155953200	155954400	11_EnhWk	ARHGEF2
chr1	156021400	156022600	6_TxWk	UBQLN4	chr1	156020800	156022400	11_EnhWk	UBQLN4
chr1	156023000	156023585	1_TssA	UBQLN4	chr1	156023000	156023585	2_TssFlnk	UBQLN4
chr1	156030951	156040295	6_TxWk	RAB25	chr1	156032800	156040295	14_ReprPCWk	RAB25
chr1	156076000	156076800	3_TssFlnkU	LMNA	chr1	156076200	156077000	11_EnhWk	LMNA
chr1	156082000	156084000	9_EnhA1	LMNA	chr1	156081800	156083800	11_EnhWk	LMNA
chr1	156121400	156123400	6_TxWk	SEMA4A	chr1	156121600	156124400	14_ReprPCWk	SEMA4A
chr1	156164200	156164800	2_TssFlnk	SLC25A44	chr1	156164200	156164800	4_TssFlnkD	SLC25A44
chr1	156182400	156182587	1_TssA	SLC25A44	chr1	156182400	156182587	2_TssFlnk	SLC25A44
chr1	156217600	156217881	6_TxWk	PAQR6	chr1	156217600	156217800	11_EnhWk	PAQR6
chr1	156250000	156250800	6_TxWk	SMG5	chr1	156250200	156251000	11_EnhWk	SMG5
chr1	156264800	156265463	2_TssFlnk	GLMP	chr1	156264800	156265400	4_TssFlnkD	GLMP
chr1	156306200	156307400	2_TssFlnk	CCT3	chr1	156306600	156307400	4_TssFlnkD	CCT3
chr1	156307105	156307400	2_TssFlnk	TSACC	chr1	156307105	156307400	4_TssFlnkD	TSACC
chr1	156316200	156316600	9_EnhA1	TSACC	chr1	156316200	156316786	12_TssBiv	TSACC
chr1	156316200	156316600	9_EnhA1	TSACC	chr1	156316200	156316786	12_TssBiv	TSACC
chr1	156458000	156458600	7_EnhG1	MEF2D	chr1	156457600	156458600	11_EnhWk	MEF2D
chr1	156460800	156462200	9_EnhA1	MEF2D	chr1	156460800	156462000	11_EnhWk	MEF2D
chr1	156465800	156468400	3_TssFlnkU	MEF2D	chr1	156466200	156467800	4_TssFlnkD	MEF2D
chr1	156468600	156468800	3_TssFlnkU	MEF2D	chr1	156468600	156468800	4_TssFlnkD	MEF2D
chr1	156495197	156516400	15_NA	IQGAP3	chr1	156496000	156515800	6_TxWk	IQGAP3
chr1	156551200	156551800	9_EnhA1	TTC24	chr1	156551200	156552000	11_EnhWk	TTC24
chr1	156561554	156561600	2_TssFlnk	NAXE	chr1	156561554	156561600	4_TssFlnkD	NAXE
chr1	156570200	156570800	2_TssFlnk	GPATCH4	chr1	156570200	156570800	4_TssFlnkD	GPATCH4
[truncated: 29,128 more rows]

## Sheet: Activated genes expression MB
Expression levels of activated genes in MB
ENSEMBL	Gene Symbol	CN Log2 fpkm+1	FSHD1 Log2 fpkm+1
ENSG00000128274.11	A4GALT	3.64284	3.5343
ENSG00000094914.8	AAAS	4.10934	4.3648
ENSG00000103591.8	AAGAB	5.62912	5.61432
ENSG00000087884.10	AAMDC	4.72454	4.51734
ENSG00000131043.7	AAR2	3.62117	3.6101
ENSG00000165029.11	ABCA1	1.41433	1.2782
ENSG00000107331.12	ABCA2	4.20391	4.0079
ENSG00000154262.8	ABCA6	0.250901	1.72614
ENSG00000150967.13	ABCB9	1.15692	1.19189
ENSG00000103222.14	ABCC1	3.24353	3.61042
ENSG00000108846.11	ABCC3	3.29401	4.10542
ENSG00000101986.8	ABCD1	3.06621	2.93131
ENSG00000100997.14	ABHD12	4.10582	4.38758
ENSG00000129968.11	ABHD17A	4.06513	3.88166
ENSG00000140526.12	ABHD2	4.39565	4.46533
ENSG00000158201.5	ABHD3	1.83619	2.36417
ENSG00000011198.3	ABHD5	4.62176	4.72687
ENSG00000136754.12	ABI1	5.21822	5.38404
ENSG00000154175.12	ABI3BP	7.90545	7.68311
ENSG00000097007.13	ABL1	4.65116	4.89055
ENSG00000143322.15	ABL2	3.79283	3.70381
ENSG00000173210.15	ABLIM3	5.89855	5.99364
ENSG00000188223.9	AC002398.9	2.69116	2.53762
ENSG00000269103.1	AC002472.1	0	0.00290589
ENSG00000218739.5	CEBPZOS	5.19777	5.32353
ENSG00000214109.3	AC008686.1	0.0206417	0.0264195
ENSG00000224361.1	AC011239.1	0.279021	0.510556
ENSG00000197604.4	AC022532.1	0.0876555	0.0457049
ENSG00000268310.1	AC087645.1	0.458343	0.592113
ENSG00000267314.1	AC104532.2	0.567229	0.436931
ENSG00000182827.8	ACBD3	4.39977	4.51786
ENSG00000097021.15	ACOT7	5.10687	5.19485
ENSG00000101473.12	ACOT8	3.71911	3.73228
ENSG00000123130.12	ACOT9	4.979	5.0665
ENSG00000168306.8	ACOX2	3.19349	3.60545
ENSG00000151726.9	ACSL1	5.07505	4.68403
ENSG00000068366.15	ACSL4	5.8537	6.42939
ENSG00000131069.15	ACSS2	4.20876	4.2843
ENSG00000115091.7	ACTR3	7.23999	7.24376
ENSG00000115170.9	ACVR1	4.50161	4.50828
ENSG00000139567.8	ACVRL1	3.66964	3.16176
ENSG00000148848.10	ADAM12	2.60565	3.70256
ENSG00000151694.8	ADAM17	3.97416	3.90335
ENSG00000168615.7	ADAM9	7.75641	7.97319
ENSG00000087116.9	ADAMTS2	5.35476	5.07409
ENSG00000158859.9	ADAMTS4	1.92687	1.75896
ENSG00000049192.10	ADAMTS6	2.67257	2.57474
ENSG00000136378.10	ADAMTS7	3.52423	3.27587
ENSG00000178031.11	ADAMTSL1	5.34757	5.44486
ENSG00000162104.5	ADCY9	2.84045	2.85598
ENSG00000087274.12	ADD1	6.7039	6.52483
ENSG00000148700.9	ADD3	4.96478	5.817
ENSG00000006831.9	ADIPOR2	3.61083	3.50032
ENSG00000156110.9	ADK	4.5378	4.9492
ENSG00000101126.11	ADNP	4.11068	4.32318
ENSG00000170425.3	ADORA2B	1.92472	2.05088
ENSG00000159322.13	ADPGK	4.47904	4.82569
ENSG00000035687.9	ADSS	4.46381	4.83639
ENSG00000157510.9	AFAP1L1	3.89203	3.69814
ENSG00000072364.8	AFF4	4.94093	5.46139
ENSG00000183077.11	AFMID	4.76273	4.67988
ENSG00000157985.13	AGAP1	3.08098	3.17447
ENSG00000173744.13	AGFG1	5.51461	5.62855
ENSG00000006530.11	AGK	3.02765	3.53774
ENSG00000123908.7	AGO2	4.1619	4.13194
ENSG00000204310.6	AGPAT1	5.30297	5.28839
ENSG00000155189.7	AGPAT5	4.54462	4.87251
ENSG00000138678.6	GPAT3	0.855155	2.57742
ENSG00000018510.8	AGPS	3.43853	3.53695
ENSG00000177674.11	AGTRAP	4.40001	4.45718
ENSG00000168710.13	AHCYL1	5.53738	5.71808
ENSG00000106546.8	AHR	4.63814	5.02604
ENSG00000063438.12	AHRR	3.07949	3.09857
ENSG00000112297.10	CRYBG1	2.42893	3.69668
ENSG00000162433.10	AK4	3.72909	3.33736
ENSG00000154027.14	AK5	8.05109	7.34553
ENSG00000108599.10	AKAP10	3.35397	4.03694
ENSG00000131016.12	AKAP12	4.72144	6.48844
ENSG00000170776.15	AKAP13	5.05798	5.13926
ENSG00000106948.12	AKNA	1.50696	1.59959
ENSG00000105221.12	AKT2	6.59631	6.54979
ENSG00000117020.12	AKT3	4.56253	4.76087
ENSG00000148218.11	ALAD	4.3809	4.05012
ENSG00000184254.12	ALDH1A3	1.94478	5.10169
ENSG00000136010.9	ALDH1L2	3.13924	3.8618
ENSG00000072210.14	ALDH3A2	4.51124	5.14492
ENSG00000006534.11	ALDH3B1	5.08804	4.99894
ENSG00000149925.12	ALDOA	11.2168	11.1086
ENSG00000182858.9	ALG12	3.2746	3.2825
ENSG00000159063.8	ALG8	4.995	5.32123
ENSG00000189046.6	ALKBH2	4.15809	3.95699
ENSG00000137760.10	ALKBH8	2.20717	2.46255
ENSG00000116127.13	ALMS1	3.24291	3.57051
ENSG00000162551.9	ALPL	7.5121	6.86591
ENSG00000110497.10	AMBRA1	2.75285	2.78606
ENSG00000123505.10	AMD1	5.78637	5.91298
ENSG00000101935.5	AMMECR1	2.86215	2.8822
ENSG00000166025.13	AMOTL1	3.4525	3.67771
ENSG00000116337.11	AMPD2	4.49728	4.52353
ENSG00000133805.11	AMPD3	2.99698	3.46694
ENSG00000145020.10	AMT	1.9648	1.84023
ENSG00000164162.8	ANAPC10	3.66989	3.87737
ENSG00000166295.4	ANAPC16	5.52457	5.40187
ENSG00000185722.12	ANKFY1	3.22743	3.15315
ENSG00000154122.8	ANKH	4.5597	5.13566
ENSG00000206560.6	ANKRD28	6.1494	6.11399
ENSG00000174501.10	ANKRD36C	1.00883	1.08973
ENSG00000154945.6	ANKRD40	3.64459	3.7947
ENSG00000137494.9	ANKRD42	2.29744	2.4218
ENSG00000064999.12	ANKS1A	3.36658	3.55886
ENSG00000011426.6	ANLN	7.47343	7.7922
ENSG00000177119.11	ANO6	3.97454	4.00286
ENSG00000166825.9	ANPEP	6.74594	6.96056
ENSG00000163297.12	ANTXR2	6.496	6.32853
ENSG00000196975.10	ANXA4	5.04277	5.17572
ENSG00000138356.9	AOX1	4.9304	6.44993
ENSG00000138660.7	AP1AR	3.64063	4.40126
ENSG00000166747.8	AP1G1	4.45593	4.52856
ENSG00000072958.4	AP1M1	5.59409	5.82812
ENSG00000196961.8	AP2A1	5.63229	5.46527
ENSG00000183020.9	AP2A2	5.82381	6.06681
ENSG00000042753.7	AP2S1	7.36651	7.46154
ENSG00000065000.11	AP3D1	5.10129	5.23859
ENSG00000221838.5	AP4M1	3.45377	3.40694
ENSG00000254470.2	AP5B1	1.57867	1.5586
ENSG00000120868.9	APAF1	3.63172	3.54441
ENSG00000011132.7	APBA3	3.10989	2.74653
ENSG00000163697.12	APBB2	5.98117	6.12612
ENSG00000138613.9	APH1B	3.4005	3.53885
ENSG00000163382.7	NAXE	4.9994	4.98853
ENSG00000130208.5	APOC1	8.94811	7.376
ENSG00000128284.15	APOL3	1.93508	2.42512
ENSG00000137074.14	APTX	4.43045	4.69602
ENSG00000021776.6	AQR	4.50649	4.42313
ENSG00000169083.11	AR	2.53154	2.52637
ENSG00000186635.10	ARAP1	4.67564	4.66703
ENSG00000095139.9	ARCN1	6.22913	6.59314
ENSG00000205595.3	AREGB	0.0204873	0.519138
ENSG00000143761.9	ARF1	7.90769	7.95665
ENSG00000066777.4	ARFGEF1	3.66073	4.03435
ENSG00000101246.15	ARFRP1	4.56919	4.47261
ENSG00000134884.9	ARGLU1	7.09238	7.37571
ENSG00000071205.7	ARHGAP10	3.75725	3.74264
ENSG00000187951.6	ARHGAP11B	2.61765	2.69401
ENSG00000165322.13	ARHGAP12	4.2092	4.31707
ENSG00000140750.12	ARHGAP17	4.96242	5.1731
ENSG00000146376.6	ARHGAP18	5.40078	4.91115
ENSG00000107863.12	ARHGAP21	4.48173	4.43096
ENSG00000128805.10	ARHGAP22	6.02005	5.86904
ENSG00000225485.3	ARHGAP23	4.26439	4.1285
ENSG00000138639.13	ARHGAP24	4.3087	4.62075
ENSG00000137962.8	ARHGAP29	4.25276	4.24096
ENSG00000111348.4	ARHGDIB	3.39524	4.11273
ENSG00000104728.11	ARHGEF10	3.88055	3.87925
ENSG00000074964.12	ARHGEF10L	3.29923	2.74143
ENSG00000110237.3	ARHGEF17	4.01903	3.76274
ENSG00000214944.5	ARHGEF28	3.82537	3.60255
ENSG00000137135.13	ARHGEF39	1.85406	1.34267
ENSG00000102606.13	ARHGEF7	3.85206	3.89302
ENSG00000117713.13	ARID1A	4.32684	4.54408
ENSG00000116017.6	ARID3A	2.143	2.11127
ENSG00000150347.10	ARID5B	3.48677	3.93448
ENSG00000214087.4	ARL16	4.77133	4.60283
ENSG00000138175.8	ARL3	3.92235	3.89482
ENSG00000165997.4	ARL5B	2.07132	2.17703
ENSG00000143862.3	ARL8A	5.79253	5.76549
ENSG00000140691.12	ARMC5	2.40169	2.36903
ENSG00000105676.9	ARMC6	4.1894	4.04667
ENSG00000114098.13	ARMC8	6.86594	6.64948
ENSG00000102401.15	ARMCX3	5.38597	5.2726
ENSG00000172379.14	ARNT2	2.76617	2.92325
ENSG00000241685.4	ARPC1A	6.18604	6.40148
ENSG00000111229.11	ARPC3	7.48409	7.74666
ENSG00000162704.11	ARPC5	6.15808	6.48389
ENSG00000113369.4	ARRDC3	3.69361	4.38884
ENSG00000153317.10	ASAP1	5.59778	6.3703
ENSG00000151693.5	ASAP2	5.94379	6.05949
ENSG00000148331.7	ASB6	3.08663	3.15847
ENSG00000116539.6	ASH1L	2.80001	2.83808
ENSG00000138381.5	ASNSD1	7.99509	8.51135
ENSG00000198363.11	ASPH	7.07223	8.33842
ENSG00000171456.12	ASXL1	3.88323	4.10292
ENSG00000143970.12	ASXL2	2.60601	2.59834
ENSG00000138138.9	ATAD1	4.32455	4.34951
ENSG00000119778.10	ATAD2B	1.73601	1.51889
ENSG00000197785.9	ATAD3A	3.55153	3.64664
ENSG00000123268.4	ATF1	4.58309	4.6466
ENSG00000118217.5	ATF6	3.6208	3.87763
ENSG00000213676.6	ATF6B	5.85627	5.72264
ENSG00000171681.8	ATF7IP	4.37936	4.42391
ENSG00000085978.17	ATG16L1	3.30644	3.61446
ENSG00000168010.6	ATG16L2	2.76038	2.7251
ENSG00000101844.13	ATG4A	3.04575	3.1242
ENSG00000168397.12	ATG4B	5.83035	5.89427
ENSG00000057663.8	ATG5	3.61918	3.67712
ENSG00000197548.8	ATG7	4.14815	4.24534
ENSG00000198925.6	ATG9A	5.01922	4.85437
ENSG00000184743.8	ATL3	4.09642	4.1518
ENSG00000145246.9	ATP10D	4.24711	3.72881
ENSG00000101974.10	ATP11C	3.79962	3.87496
ENSG00000133657.10	ATP13A3	5.23504	5.38121
ENSG00000143153.8	ATP1B1	4.69441	4.46433
ENSG00000174437.12	ATP2A2	6.34189	6.62485
ENSG00000070961.10	ATP2B1	8.31488	7.90937
ENSG00000058668.10	ATP2B4	4.00429	4.77182
ENSG00000017260.15	ATP2C1	5.54376	5.9603
ENSG00000165629.15	ATP5F1C	8.00679	8.16267
ENSG00000159199.9	ATP5MC1	7.46714	7.2835
ENSG00000125375.10	DMAC2L	2.78669	2.96446
ENSG00000182220.9	ATP6AP2	6.16302	6.2903
ENSG00000159720.7	ATP6V0D1	5.77631	5.65908
ENSG00000136888.6	ATP6V1G1	6.34191	6.27877
ENSG00000143515.12	ATP8B2	3.22572	3.63987
ENSG00000138085.12	ATRAID	7.53898	7.72918
ENSG00000124788.13	ATXN1	2.49247	2.43274
ENSG00000130638.11	ATXN10	7.93862	7.86131
ENSG00000204842.10	ATXN2	5.9469	5.86426
ENSG00000163635.13	ATXN7	3.02003	2.86367
ENSG00000162650.11	ATXN7L2	1.44004	1.3214
ENSG00000135407.6	AVIL	1.63659	0.796628
ENSG00000105778.13	AVL9	3.97451	3.86865
ENSG00000119986.6	AVPI1	3.21317	3.82361
ENSG00000155096.9	AZIN1	5.84798	5.87204
ENSG00000086062.8	B4GALT1	5.63045	5.55246
ENSG00000117411.12	B4GALT2	5.37564	5.2765
ENSG00000121578.8	B4GALT4	4.44233	4.49548
ENSG00000027847.9	B4GALT7	4.51932	4.1647
ENSG00000108641.10	B9D1	2.88384	2.93556
ENSG00000006453.9	BAIAP2L1	2.15174	2.80792
ENSG00000172530.15	BANP	2.44175	2.4661
ENSG00000156127.6	BATF	0.00485023	1.8395
ENSG00000198604.6	BAZ1A	5.64534	6.22504
ENSG00000214413.3	BBIP1	5.31331	5.45019
ENSG00000181004.5	BBS12	1.80955	1.76761
ENSG00000114439.14	BBX	4.76526	5.21567
ENSG00000075790.6	BCAP29	5.89647	6.1026
ENSG00000137936.12	BCAR3	5.8099	5.40278
ENSG00000110987.4	BCL7A	2.22773	2.05571
ENSG00000106635.3	BCL7B	6.67923	6.79451
ENSG00000099385.7	BCL7C	4.22059	4.21317
ENSG00000186174.8	BCL9L	5.12284	5.58255
ENSG00000029363.11	BCLAF1	6.72225	6.93282
ENSG00000186716.15	BCR	2.78902	3.14123
ENSG00000145734.14	BDP1	3.25563	3.35733
ENSG00000167995.11	BEST1	1.70852	1.77585
ENSG00000182492.11	BGN	2.36198	4.27513
ENSG00000180535.3	BHLHA15	0.0383053	0.0458859
ENSG00000123095.5	BHLHE41	3.20142	3.63817
ENSG00000122870.7	BICC1	2.44012	3.45859
ENSG00000151746.9	BICD1	2.75351	2.84556
ENSG00000015475.14	BID	4.43687	4.54784
ENSG00000136717.10	BIN1	7.63549	7.94455
ENSG00000147439.7	BIN3	4.50462	4.5551
ENSG00000023445.9	BIRC3	2.04457	2.56432
ENSG00000115760.9	BIRC6	4.42617	4.61573
ENSG00000166619.8	BLCAP	5.41958	5.28344
ENSG00000108578.10	BLMH	4.37081	4.21304
ENSG00000090013.5	BLVRB	5.13261	5.17324
ENSG00000125845.6	BMP2	0.471898	0.855277
ENSG00000165733.7	BMS1	3.16056	3.33171
ENSG00000173068.13	BNC2	2.56611	2.70507
ENSG00000140299.7	BNIP2	5.96706	6.21172
ENSG00000163141.14	BNIPL	0.114118	0.0650181
ENSG00000144857.10	BOC	3.0141	3.52277
ENSG00000170727.7	BOP1	3.84065	3.80282
ENSG00000171634.12	BPTF	5.27043	5.47242
ENSG00000158019.16	BABAM2	4.62751	4.751
ENSG00000182685.3	BRICD5	1.88804	1.45977
ENSG00000100916.9	BRMS1L	3.78755	4.08262
ENSG00000156983.11	BRPF1	3.43521	2.98371
ENSG00000185658.9	BRWD1	2.93676	2.93728
ENSG00000172270.14	BSG	8.39735	8.51107
ENSG00000134717.13	BTF3L4	5.18474	5.22843
ENSG00000120029.8	ARMH3	3.152	3.45044
ENSG00000171067.6	C11orf24	5.30617	5.49656
ENSG00000158636.12	EMSY	3.44575	3.4933
ENSG00000173715.11	C11orf80	3.42711	2.73906
ENSG00000173237.4	C11orf86	0.00477352	0.0363639
ENSG00000151135.5	TMEM263	4.91386	5.09984
ENSG00000047621.7	C12orf4	3.40947	3.64615
ENSG00000235162.4	C12orf75	7.10309	6.87193
ENSG00000087302.4	RTRAF	8.07716	8.13551
ENSG00000214900.4	LINC01588	0.557252	0.825197
ENSG00000140104.9	CLBA1	2.40783	2.51696
ENSG00000166780.6	C16orf45	5.01259	5.69607
ENSG00000185716.7	MOSMO	3.28911	4.23375
ENSG00000140688.12	C16orf58	4.66736	4.73525
ENSG00000231256.3	CFAP97D1	0.172526	0.0213471
ENSG00000108666.5	C17orf75	2.97996	3.12398
ENSG00000131943.13	C19orf12	3.34865	3.2758
ENSG00000119559.11	C19orf25	4.24566	4.11646
ENSG00000123144.6	TRIR	7.30929	7.1731
ENSG00000104979.4	C19orf53	6.8871	6.85234
ENSG00000106392.6	C1GALT1	5.63185	5.82919
ENSG00000116922.10	C1orf109	3.71044	3.74935
ENSG00000119280.12	C1orf198	4.75069	4.69407
ENSG00000162642.9	C1orf52	3.61144	3.68844
ENSG00000162585.12	FAAP20	5.68726	5.53684
ENSG00000125531.5	FNDC11	0.0876138	0.0892728
ENSG00000157617.12	C2CD2	2.89978	3.59468
ENSG00000111731.8	C2CD5	3.48061	3.46094
ENSG00000178074.5	C2orf69	2.7631	3.13931
ENSG00000088543.10	C3orf18	2.70842	2.58029
ENSG00000188315.3	C3orf62	1.55741	1.91363
ENSG00000174749.5	FAM241A	1.26246	2.08684
ENSG00000197405.3	C5AR1	0.363702	0.464671
ENSG00000134830.3	C5AR2	0.248169	0.67404
ENSG00000196821.5	C6orf106	3.94927	4.10594
ENSG00000130349.5	C6orf203	4.75592	5.00775
ENSG00000198663.12	C6orf89	4.60345	4.74246
ENSG00000175600.11	SUGCT	4.87856	4.43602
ENSG00000164603.7	BMT2	3.04239	3.21072
ENSG00000241852.5	C8orf58	3.155	3.24391
ENSG00000176731.7	C8orf59	7.01338	7.02547
ENSG00000148120.10	C9orf3	5.88427	5.70465
ENSG00000186354.6	C9orf47	0.0649936	0.0928867
ENSG00000165118.10	C9orf64	2.78736	2.73226
ENSG00000165233.13	CARD19	5.04793	5.31348
ENSG00000074410.9	CA12	1.69746	4.26781
ENSG00000135932.6	CAB39	4.5328	4.96735
ENSG00000102547.14	CAB39L	2.12004	2.73831
ENSG00000099991.12	CABIN1	3.81937	3.78473
ENSG00000134508.8	CABLES1	2.71791	3.59462
ENSG00000167535.3	CACNB3	2.97102	3.33489
ENSG00000151893.10	CACUL1	3.38159	3.46039
ENSG00000116161.13	CACYBP	7.35438	7.68335
ENSG00000084774.9	CAD	4.1932	4.09017
ENSG00000122786.15	CALD1	8.49072	8.25523
ENSG00000128595.12	CALU	8.79992	8.93283
ENSG00000145349.12	CAMK2D	5.01268	5.43312
ENSG00000164615.3	CAMLG	4.86494	4.85053
ENSG00000130559.14	CAMSAP1	3.23272	3.14545
ENSG00000118200.10	CAMSAP2	4.19763	4.65833
ENSG00000103326.6	CAPN15	3.16313	3.27444
ENSG00000149260.10	CAPN5	3.57445	3.88227
ENSG00000116489.8	CAPZA1	6.41499	6.86019
ENSG00000198898.8	CAPZA2	7.45426	7.57249
ENSG00000077549.13	CAPZB	7.50341	7.43425
ENSG00000132357.9	CARD6	1.04182	1.84154
ENSG00000142453.7	CARM1	4.73324	4.5858
ENSG00000110619.12	CARS	5.80297	5.82053
ENSG00000134905.12	CARS2	5.82782	6.14623
ENSG00000138794.5	CASP6	3.58424	3.67327
ENSG00000105971.10	CAV2	7.61255	7.34611
ENSG00000067955.9	CBFB	5.10975	5.06086
ENSG00000114423.14	CBLB	2.89124	3.55817
ENSG00000196873.11	CBWD3	0.216618	0.150738
ENSG00000122565.14	CBX3	6.73525	7.00746
ENSG00000094916.9	CBX5	5.54201	5.38168
ENSG00000048342.11	CC2D2A	3.30001	3.54738
ENSG00000060339.9	CCAR1	5.79241	6.0472
ENSG00000183287.9	CCBE1	6.32523	5.94207
ENSG00000160799.7	CCDC12	5.58223	5.42056
ENSG00000151773.8	CCDC122	2.56362	3.47145
ENSG00000164366.3	CCDC127	1.7173	1.83957
ENSG00000004766.11	VPS50	3.56269	3.83046
ENSG00000135637.9	CCDC142	1.41149	1.3137
ENSG00000160050.10	CCDC28B	2.65667	2.80832
ENSG00000173421.12	CCDC36	1.17641	1.10702
ENSG00000173588.10	CEP83	3.09875	3.50387
ENSG00000152492.9	CCDC50	4.66416	5.34799
ENSG00000176155.14	CCDC57	3.79472	3.59997
ENSG00000149231.7	CCDC82	5.48977	5.44293
ENSG00000137500.5	CCDC90B	6.39392	6.40485
ENSG00000119242.4	CCDC92	4.93778	5.05726
ENSG00000125633.6	CCDC93	3.28789	3.84581
ENSG00000136280.11	CCM2	5.30683	5.33279
ENSG00000108100.13	CCNY	6.5041	6.43168
ENSG00000151014.4	NOCT	2.08394	2.03474
ENSG00000135624.11	CCT7	8.08671	8.30014
ENSG00000156261.8	CCT8	6.82407	7.181
ENSG00000117281.11	CD160	0.244807	0.213401
ENSG00000026508.12	CD44	9.18491	9.36077
ENSG00000196352.9	CD55	4.73098	5.15127
ENSG00000081377.12	CDC14B	2.63525	2.60949
ENSG00000158402.14	CDC25C	2.41056	2.38496
ENSG00000105401.2	CDC37	7.42339	7.3746
ENSG00000070831.11	CDC42	6.26463	6.38709
ENSG00000198752.5	CDC42BPB	4.49752	4.46248
ENSG00000149798.3	CDC42EP2	4.07857	4.2083
ENSG00000163171.6	CDC42EP3	8.33831	7.82293
ENSG00000184661.9	CDCA2	2.92383	3.5541
ENSG00000163814.3	CDCP1	2.88651	3.55867
ENSG00000103502.9	CDIPT	5.51655	5.15592
ENSG00000008128.18	CDK11A	5.12361	5.19692
ENSG00000167258.9	CDK12	3.95613	4.61729
ENSG00000058091.12	CDK14	2.00535	3.11132
ENSG00000138395.10	CDK15	2.349	2.40304
ENSG00000059758.3	CDK17	4.23476	4.40754
ENSG00000136861.13	CDK5RAP2	4.91574	5.10947
ENSG00000105810.5	CDK6	4.95083	4.68471
ENSG00000185267.5	CDNF	1.25262	1.91539
ENSG00000140743.3	CDR2	3.74417	4.31158
ENSG00000091527.11	CDV3	6.93087	7.08886
ENSG00000186567.8	CEACAM19	2.66835	2.94623
ENSG00000149187.13	CELF1	3.97521	4.1306
ENSG00000048740.13	CELF2	4.46168	4.1742
ENSG00000151849.10	CENPJ	3.21168	3.4084
ENSG00000120334.11	CENPL	2.78098	2.72899
ENSG00000099814.11	CEP170B	3.35016	3.28038
ENSG00000011523.9	CEP68	2.87811	2.64228
ENSG00000111860.9	CEP85L	1.61984	1.89336
ENSG00000258890.2	CEP95	4.14225	4.18214
ENSG00000172292.10	CERS6	3.51149	3.77249
ENSG00000197766.3	CFD	3.37131	4.71257
ENSG00000153774.4	CFDP1	6.30563	6.30704
ENSG00000172757.8	CFL1	9.84216	9.58501
ENSG00000128965.7	CHAC1	3.75953	4.09602
ENSG00000106153.12	CHCHD2	7.32206	7.26708
ENSG00000131778.13	CHD1L	4.06832	4.62209
ENSG00000100888.8	CHD8	5.14769	4.91197
ENSG00000177200.11	CHD9	3.70346	3.96569
ENSG00000149554.8	CHEK1	3.90761	4.20977
ENSG00000072609.13	CHFR	4.28051	4.307
ENSG00000254505.4	CHMP4A	7.14309	7.1695
ENSG00000086065.9	CHMP5	5.58962	5.65396
ENSG00000128656.9	CHN1	6.32152	5.81244
ENSG00000108556.7	CHRNE	0.319542	0.490885
ENSG00000168802.8	CHTF8	5.84254	5.76543
ENSG00000079432.3	CIC	3.80252	3.59596
ENSG00000136305.7	CIDEB	1.66569	1.74302
ENSG00000122873.7	CISD1	4.94485	5.08526
ENSG00000074054.13	CLASP1	3.08667	3.31586
ENSG00000011021.17	CLCN6	2.13931	2.00134
ENSG00000038532.10	CLEC16A	3.00395	2.96336
ENSG00000169504.10	CLIC4	8.75233	8.06932
ENSG00000106665.11	CLIP2	3.14535	3.50203
ENSG00000115295.15	CLIP4	3.47867	3.70978
ENSG00000176444.14	CLK2	4.42053	4.25697
ENSG00000179335.14	CLK3	5.22918	4.92862
ENSG00000166250.7	CLMP	5.22079	6.24809
ENSG00000134852.10	CLOCK	3.93502	4.0377
ENSG00000122705.12	CLTA	7.30862	7.40953
ENSG00000175416.8	CLTB	6.82862	6.75786
ENSG00000141367.7	CLTC	7.02415	6.9883
ENSG00000153815.12	CMIP	4.50276	4.45933
ENSG00000162368.9	CMPK1	6.24011	6.52657
ENSG00000183723.8	CMTM4	2.42538	2.49455
ENSG00000091317.7	CMTM6	4.3884	4.46331
ENSG00000137200.8	CMTR1	3.587	3.6833
ENSG00000169714.12	CNBP	7.68648	7.6324
ENSG00000133313.10	CNDP2	5.16832	5.40296
ENSG00000100528.7	CNIH1	6.36802	6.81711
ENSG00000143771.7	CNIH4	5.46958	5.54358
ENSG00000153721.13	CNKSR3	2.26902	2.62041
ENSG00000125107.12	CNOT1	6.34175	6.73654
ENSG00000158435.3	CNOT11	5.10022	5.32855
ENSG00000115649.11	CNPPD1	4.18541	4.01122
ENSG00000137161.12	CNPY3	4.3436	4.12198
ENSG00000118432.11	CNR1	2.07771	4.20477
ENSG00000162852.9	CNST	2.1081	2.31546
ENSG00000176563.5	CNTD1	0.551073	0.508819
ENSG00000084636.13	COL16A1	3.04502	3.43602
ENSG00000188517.10	COL25A1	3.20306	2.68041
ENSG00000196739.10	COL27A1	2.74916	2.65955
ENSG00000215018.5	COL28A1	2.29286	1.94135
ENSG00000187498.10	COL4A1	5.16885	4.18285
ENSG00000134871.13	COL4A2	5.605	4.93398
ENSG00000130635.11	COL5A1	6.18558	5.71569
ENSG00000204262.7	COL5A2	6.19829	5.71251
ENSG00000080573.6	COL5A3	3.16357	2.95043
ENSG00000142156.10	COL6A1	7.91614	8.44976
ENSG00000142173.10	COL6A2	8.86546	9.66411
ENSG00000163359.11	COL6A3	5.62779	7.79824
ENSG00000114270.11	COL7A1	2.91478	2.80946
ENSG00000144810.11	COL8A1	6.23642	6.35135
ENSG00000170619.8	COMMD5	4.26931	4.20994
ENSG00000188243.8	COMMD6	7.54306	7.54503
ENSG00000129083.8	COPB1	6.20846	6.33544
ENSG00000184432.5	COPB2	6.60416	6.78994
ENSG00000172301.6	COPRS	6.00461	5.81107
ENSG00000111652.5	COPS7A	5.99344	5.8509
ENSG00000172725.9	CORO1B	5.69254	5.5622
ENSG00000103647.8	CORO2B	2.33585	2.74574
ENSG00000103187.6	COTL1	6.7658	7.74501
ENSG00000127184.6	COX7C	8.88628	8.78946
ENSG00000158525.11	CPA5	0.951409	0.475168
ENSG00000137449.11	CPEB2	2.23663	3.49002
ENSG00000106034.13	CPED1	4.79724	4.34864
ENSG00000178773.10	CPNE7	3.77146	3.53913
ENSG00000071894.10	CPSF1	4.65842	4.65645
ENSG00000119203.9	CPSF3	5.05993	4.99307
ENSG00000127054.14	INTS11	5.83696	5.80661
ENSG00000111605.12	CPSF6	7.51831	7.41563
ENSG00000169372.8	CRADD	3.35427	3.82814
ENSG00000107175.6	CREB3	4.55557	4.5332
ENSG00000157613.6	CREB3L1	5.9782	5.61716
ENSG00000182158.10	CREB3L2	3.66117	4.26204
ENSG00000005339.8	CREBBP	3.92236	4.29773
ENSG00000103196.7	CRISPLD2	4.17318	4.47139
ENSG00000099942.8	CRKL	3.95412	3.9015
ENSG00000006016.6	CRLF1	7.4674	7.73026
ENSG00000176390.10	CRLF3	2.37154	2.59553
ENSG00000170275.10	CRTAP	6.91439	7.19302
ENSG00000140577.11	CRTC3	3.83882	3.94151
ENSG00000121671.7	CRY2	2.25572	2.22626
ENSG00000108255.3	CRYBA1	0.108435	0.0298505
ENSG00000124207.12	CSE1L	5.87903	6.07437
ENSG00000169826.6	CSGALNACT2	4.39971	5.08439
ENSG00000113712.12	CSNK1A1	6.49291	6.61652
ENSG00000141551.10	CSNK1D	5.91794	5.99774
ENSG00000213923.6	CSNK1E	6.47328	6.4621
ENSG00000101266.12	CSNK2A1	4.92008	4.93605
ENSG00000175183.5	CSRP2	5.81073	4.98377
ENSG00000101439.4	CST3	8.36813	8.30642
ENSG00000160213.5	CSTB	6.42484	6.31632
ENSG00000101138.7	CSTF1	4.35375	4.2488
ENSG00000176102.7	CSTF3	4.77295	4.84678
ENSG00000175029.12	CTBP2	3.88637	3.95758
ENSG00000178971.9	CTC1	2.23017	2.31927
ENSG00000267261.1	CTD-2132N18.3	0.637323	1.39421
ENSG00000266208.1	CTD-2267D19.3	1.26107	1.43217
ENSG00000269545.1	CTD-3138B18.4	0.0326177	0.0100251
ENSG00000183248.7	PRR36	0.0179655	0.0300137
ENSG00000245888.2	NSMCE1-DT	0.504739	0.327491
ENSG00000141979.4	CTD-3222D19.2	0.0703348	0.0663753
ENSG00000175215.5	CTDSP2	5.31353	5.37228
ENSG00000134030.9	CTIF	4.48458	4.53533
ENSG00000168036.12	CTNNB1	6.73258	6.46682
ENSG00000132792.14	CTNNBL1	5.44214	5.41366
ENSG00000040531.10	CTNS	2.63733	2.67166
ENSG00000171793.9	CTPS1	5.46211	5.68982
ENSG00000198730.3	CTR9	4.62662	4.73772
ENSG00000109861.11	CTSC	5.77818	6.06412
ENSG00000143079.10	CTTNBP2NL	3.86631	3.94485
ENSG00000108094.10	CUL2	4.28513	4.57769
ENSG00000119929.8	CUTC	4.76335	4.77335
ENSG00000257923.5	CUX1	5.1174	5.1761
ENSG00000163735.6	CXCL5	1.30256	6.62188
ENSG00000124875.5	CXCL6	0.659736	2.75471
ENSG00000204904.3	LINC01545	0.175076	0.0440366
ENSG00000008283.11	CYB561	1.97793	2.57854
ENSG00000103018.12	CYB5B	5.99409	6.16404
ENSG00000159348.8	CYB5R1	7.06557	7.01831
ENSG00000071967.7	CYBRD1	6.0235	5.84874
ENSG00000187954.8	CYHR1	4.27911	4.03825
ENSG00000083799.13	CYLD	3.94747	4.14444
ENSG00000119004.10	CYP20A1	3.01488	2.77761
ENSG00000145476.11	CYP4V2	1.78619	1.59715
ENSG00000120306.5	CYSTM1	2.65161	3.16649
ENSG00000108669.12	CYTH1	4.38306	4.29911
ENSG00000008256.11	CYTH3	5.14026	4.9005
ENSG00000146122.12	DAAM2	5.60467	5.03431
ENSG00000173402.7	DAG1	6.06676	5.84624
ENSG00000115866.6	DARS	7.37767	7.37697
ENSG00000071626.12	DAZAP1	6.80166	7.05717
ENSG00000183283.11	DAZAP2	7.01967	6.83266
ENSG00000155368.12	DBI	8.46854	8.26787
ENSG00000113758.9	DBN1	8.48179	8.75242
ENSG00000115827.9	DCAF17	2.84146	3.04801
ENSG00000057019.11	DCBLD2	7.19144	7.16097
ENSG00000162290.12	DCP1A	2.51018	2.8763
ENSG00000172795.11	DCP2	2.27349	2.7099
ENSG00000110063.4	DCPS	3.9894	3.76936
ENSG00000129187.10	DCTD	5.67975	5.75894
ENSG00000204843.8	DCTN1	7.03682	7.0816
ENSG00000175203.11	DCTN2	7.74452	7.72698
ENSG00000109184.10	DCUN1D4	4.03675	4.35164
ENSG00000153904.14	DDAH1	6.04945	5.74817
ENSG00000213722.4	DDAH2	5.24578	5.1823
ENSG00000134574.7	DDB2	3.7739	3.27792
ENSG00000100523.10	DDHD1	2.27588	2.78913
ENSG00000197312.7	DDI2	2.60765	2.66044
ENSG00000204580.7	DDR1	5.11696	4.5111
ENSG00000162733.12	DDR2	4.33492	4.66174
ENSG00000100201.14	DDX17	6.45681	6.47977
ENSG00000088205.8	DDX18	4.71715	4.91172
ENSG00000165732.8	DDX21	5.12587	5.74631
ENSG00000165359.10	INTS6L	1.8989	1.47149
ENSG00000125485.13	DDX31	2.58057	2.60894
ENSG00000145833.11	DDX46	5.41058	5.56547
ENSG00000108654.7	DDX5	9.61666	9.87824
ENSG00000136271.6	DDX56	4.9729	4.91515
ENSG00000110367.7	DDX6	4.278	4.51187
ENSG00000140995.12	DEF8	5.07986	5.07451
ENSG00000143753.8	DEGS1	5.86661	6.10873
ENSG00000170456.10	DENND5B	2.10861	2.33628
ENSG00000024526.12	DEPDC1	3.42133	3.42451
ENSG00000035499.8	DEPDC1B	1.48178	1.71308
ENSG00000023697.8	DERA	5.24529	5.43912
ENSG00000136986.5	DERL1	4.76635	4.97338
ENSG00000099958.10	DERL3	2.63243	3.96608
ENSG00000100418.7	DESI1	4.4174	5.25179
ENSG00000182108.5	DEXI	4.29549	4.31054
ENSG00000185000.5	DGAT1	4.76673	4.75227
ENSG00000062282.10	DGAT2	0.236813	1.64568
ENSG00000065357.15	DGKA	6.36331	6.31533
ENSG00000145214.9	DGKQ	1.8798	1.94123
ENSG00000149091.11	DGKZ	3.86008	3.97896
ENSG00000114956.15	DGUOK	5.44644	5.47424
ENSG00000117682.12	DHDDS	4.29486	4.24559
ENSG00000162496.4	DHRS3	1.7909	2.64057
ENSG00000204560.5	DHX16	5.10664	5.44411
ENSG00000101452.10	DHX35	2.12113	1.87617
ENSG00000174953.9	DHX36	5.04009	5.11937
ENSG00000131504.11	DIAPH1	4.29453	4.78008
ENSG00000160305.13	DIP2A	2.9587	3.04577
ENSG00000151240.11	DIP2C	2.3443	2.35418
ENSG00000174325.4	DIRC1	0.156667	0.274196
ENSG00000083520.10	DIS3	4.13734	4.68351
ENSG00000050165.13	DKK3	7.2741	7.01481
ENSG00000164741.10	DLC1	3.90941	4.50325
ENSG00000075711.16	DLG1	5.77384	5.49481
ENSG00000172869.10	DMXL1	3.70293	3.89638
ENSG00000165506.10	DNAAF2	2.15252	2.14011
ENSG00000103423.9	DNAJA3	5.22184	5.29685
ENSG00000148719.10	DNAJB12	4.029	4.26902
ENSG00000105993.10	DNAJB6	5.38943	5.22667
ENSG00000136770.6	DNAJC1	4.11924	4.49529
ENSG00000138246.11	DNAJC13	3.99885	4.07498
ENSG00000120675.4	DNAJC15	4.74504	5.33827
ENSG00000170464.5	DNAJC18	4.03997	3.96443
ENSG00000102580.10	DNAJC3	3.8307	3.91266
ENSG00000101152.6	DNAJC5	4.42118	4.41179
ENSG00000168259.10	DNAJC7	6.68054	6.52601
ENSG00000107554.11	DNMBP	3.16248	3.15704
ENSG00000067334.9	DNTTIP2	5.13197	5.73517
ENSG00000150760.8	DOCK1	3.75935	3.79058
ENSG00000135905.14	DOCK10	3.43367	4.13462
ENSG00000130158.9	DOCK6	3.51095	3.19613
ENSG00000116641.11	DOCK7	3.61353	3.73101
ENSG00000088387.13	DOCK9	5.34827	5.69926
ENSG00000104885.13	DOT1L	3.31542	3.59218
ENSG00000117543.15	DPH5	5.49271	5.6229
ENSG00000197635.5	DPP4	4.47708	5.30626
ENSG00000188641.8	DPYD	3.05657	3.23171
ENSG00000117505.8	DR1	4.67534	4.64942
ENSG00000113360.12	DROSHA	6.58689	6.81891
ENSG00000102385.8	DRP2	0.793688	0.896576
ENSG00000136982.5	DSCC1	1.89021	2.06096
ENSG00000151914.13	DST	6.92352	6.98477
ENSG00000133059.12	DSTYK	1.96364	2.0835
ENSG00000091073.15	DTX2	2.49235	2.23495
ENSG00000169718.13	DUS1L	5.27032	5.10552
ENSG00000144048.6	DUSP11	4.19828	4.39854
ENSG00000108861.4	DUSP3	4.36286	4.06929
ENSG00000164086.8	DUSP7	2.77753	2.43935
ENSG00000197102.6	DYNC1H1	7.19416	7.30604
ENSG00000077380.11	DYNC1I2	5.86407	5.97368
ENSG00000088986.6	DYNLL1	8.54326	8.47397
ENSG00000157540.15	DYRK1A	4.37134	4.37069
ENSG00000158163.10	DZIP1L	2.58125	2.53395
ENSG00000165891.11	E2F7	2.38579	2.69272
ENSG00000164330.12	EBF1	0.481695	1.61817
ENSG00000221818.4	EBF2	0.702961	3.13062
ENSG00000117298.10	ECE1	5.14556	5.71978
ENSG00000093144.14	ECHDC1	5.71365	5.98168
ENSG00000167969.8	ECI1	4.66585	4.41179
ENSG00000114346.9	ECT2	4.50942	4.68598
ENSG00000038358.10	EDC4	5.37025	5.38936
ENSG00000104529.13	EEF1D	9.51969	9.38171
ENSG00000132394.6	EEFSEC	2.4512	2.4129
ENSG00000130038.5	CRACR2A	1.82903	2.08412
ENSG00000115380.14	EFEMP1	7.38062	7.37244
ENSG00000096093.10	EFHC1	4.095	3.74842
ENSG00000142634.8	EFHD2	5.2457	5.0838
ENSG00000184349.8	EFNA5	2.68557	3.00313
ENSG00000132294.9	EFR3A	4.39441	4.50347
ENSG00000146648.11	EGFR	3.43238	3.85123
ENSG00000135766.8	EGLN1	4.06242	4.16009
ENSG00000115504.10	EHBP1	4.96104	5.04012
ENSG00000173442.7	EHBP1L1	5.46461	5.82875
ENSG00000024422.7	EHD2	6.38996	6.50088
ENSG00000128829.7	EIF2AK4	4.60146	4.74455
ENSG00000115211.11	EIF2B4	4.80847	5.00572
ENSG00000106263.13	EIF3B	6.83707	7.12768
ENSG00000205609.8	EIF3CL	0.00879289	0.00593866
ENSG00000175390.8	EIF3F	7.0735	6.94721
ENSG00000100129.13	EIF3L	8.8448	8.685
ENSG00000149100.8	EIF3M	8.22852	8.35603
ENSG00000151247.8	EIF4E	3.78579	4.09868
ENSG00000066044.9	ELAVL1	4.80492	4.79037
ENSG00000120690.9	ELF1	4.11981	4.52059
ENSG00000126767.13	ELK1	3.99708	4.01999
ENSG00000105656.8	ELL	2.49666	2.40112
ENSG00000062598.13	ELMO2	4.28783	4.21097
ENSG00000156030.8	ELMSAN1	3.43501	3.37221
ENSG00000163832.11	ELP6	4.19681	4.23621
ENSG00000170571.7	EMB	4.56209	3.84834
ENSG00000104412.3	EMC2	5.30707	5.63458
ENSG00000125037.8	EMC3	5.85733	5.99189
ENSG00000126749.10	EMG1	4.76197	5.0025
ENSG00000143924.14	EML4	3.46905	4.09
ENSG00000149218.4	ENDOD1	4.39006	5.20958
ENSG00000106991.9	ENG	6.3177	6.63221
ENSG00000132199.14	ENOSF1	3.87556	4.01575
ENSG00000197594.7	ENPP1	5.3035	3.31423
ENSG00000143420.13	ENSA	5.74606	5.75084
ENSG00000197217.8	ENTPD4	4.3944	4.60996
ENSG00000185684.8	EP400P1	2.44855	2.61168
ENSG00000116016.9	EPAS1	3.96416	4.58764
ENSG00000115109.9	EPB41L5	2.89093	3.19603
ENSG00000120616.11	EPC1	3.8488	3.81603
ENSG00000152223.8	EPG5	4.2863	4.43883
ENSG00000072134.11	EPN2	4.48249	4.88355
ENSG00000085832.12	EPS15	4.08408	4.18175
ENSG00000127527.9	EPS15L1	3.91475	3.70362
ENSG00000082805.15	ERC1	4.89167	5.5001
ENSG00000012061.11	ERCC1	6.70866	6.47973
ENSG00000182150.11	ERCC6L2	3.43148	3.49593
ENSG00000100632.6	ERH	7.22104	7.25713
ENSG00000104714.9	ERICH1	4.81729	5.15399
ENSG00000147475.10	ERLIN2	4.0459	4.19478
ENSG00000136541.10	ERMN	0.205176	0.0949932
ENSG00000089248.6	ERP29	6.57647	6.60791
ENSG00000023318.7	ERP44	3.8404	4.06069
ENSG00000135476.7	ESPL1	1.78787	1.8178
ENSG00000140009.14	ESR2	0.243902	0.333585
ENSG00000117868.11	ESYT2	4.77074	4.84671
ENSG00000157557.7	ETS2	2.49245	2.4875
ENSG00000006468.9	ETV1	3.91083	4.23708
ENSG00000175832.8	ETV4	3.96523	4.29023
ENSG00000115363.9	EVA1A	2.48938	2.91873
ENSG00000196405.8	EVL	5.62401	5.67642
ENSG00000070367.11	EXOC5	4.59864	4.74241
ENSG00000157036.8	EXOG	3.43279	3.59469
ENSG00000182197.6	EXT1	4.57591	4.64339
ENSG00000092820.13	EZR	5.85543	5.20717
ENSG00000117525.9	F3	3.26426	3.00895
ENSG00000103876.7	FAH	3.72491	4.20043
ENSG00000167106.7	FAM102A	1.99453	2.35664
ENSG00000169122.7	FAM110B	3.44883	2.65415
ENSG00000197712.7	FAM114A1	5.37779	5.53279
ENSG00000100376.7	FAM118A	2.97762	2.91915
ENSG00000112584.9	FAM120B	3.57751	3.53166
ENSG00000122591.7	FAM126A	5.23761	5.66855
ENSG00000178752.11	ERFE	4.04144	4.94811
ENSG00000141699.6	RETREG3	3.34809	3.22093
ENSG00000138640.10	FAM13A	2.95513	3.39647
ENSG00000182646.12	FAM156A	0.153999	0.139487
ENSG00000179304.12	FAM156B	0.426813	0.372174
ENSG00000051009.6	FAM160A2	3.06435	3.16474
ENSG00000151553.10	FAM160B1	3.48992	3.67085
ENSG00000183807.6	FAM162B	0.395592	2.31938
ENSG00000054965.6	FAM168A	3.35419	3.53465
ENSG00000152102.13	FAM168B	5.01733	5.10299
ENSG00000148468.12	FAM171A1	3.21122	3.24429
ENSG00000113391.12	FAM172A	3.70108	3.82486
ENSG00000174132.8	FAM174A	4.79206	4.8107
ENSG00000151327.8	FAM177A1	5.80211	5.94161
ENSG00000125386.10	FAM193A	3.38888	3.496
ENSG00000146067.11	FAM193B	5.17704	4.64918
ENSG00000230567.3	FAM203B	1.10599	0.696037
ENSG00000116199.7	FAM20B	4.19087	4.37697
ENSG00000196227.6	FAM217B	2.04663	1.93523
ENSG00000099290.11	WASHC2A	2.74127	2.69605
ENSG00000173065.9	FAM222B	3.67982	3.771
ENSG00000182368.4	FAM27A	0.199584	0.144676
ENSG00000122376.7	SHLD2	2.47566	2.64528
ENSG00000153310.14	FAM49B	5.57059	5.62427
ENSG00000120709.6	FAM53C	3.55861	3.64868
ENSG00000167695.10	FAM57A	3.31031	3.59759
ENSG00000129195.11	PIMREG	2.53006	2.43368
ENSG00000203817.5	FAM72C	0.22297	0.135084
ENSG00000180488.10	MIGA1	2.43015	2.98201
ENSG00000148343.14	MIGA2	2.49532	2.4778
ENSG00000126882.8	FAM78A	1.03915	1.12882
ENSG00000180921.6	FAM83H	1.00583	1.63662
ENSG00000158483.11	FAM86C1	2.32674	2.56315
ENSG00000112039.3	FANCE	1.84373	2.08315
ENSG00000221829.5	FANCG	3.3853	3.72099
ENSG00000152767.11	FARP1	4.92696	4.61277
ENSG00000006607.9	FARP2	3.93012	3.85069
ENSG00000026103.15	FAS	4.07873	4.39635
ENSG00000196159.7	FAT4	1.77663	2.29906
ENSG00000170271.6	FAXDC2	2.54159	2.71071
ENSG00000162458.8	FBLIM1	3.34893	3.47245
ENSG00000077942.13	FBLN1	6.40795	5.17168
ENSG00000140092.10	FBLN5	2.76471	3.39003
ENSG00000166147.9	FBN1	5.96394	6.32688
ENSG00000112787.8	FBRSL1	5.22692	4.9271
ENSG00000127452.4	FBXL12	3.315	3.09939
ENSG00000155034.14	FBXL18	1.44345	1.2751
ENSG00000153558.9	FBXL2	3.10504	3.07654
ENSG00000108306.7	FBXL20	1.99182	1.94265
ENSG00000005812.6	FBXL3	4.91468	5.04247
ENSG00000118564.10	FBXL5	4.98244	4.92597
ENSG00000134452.15	FBH1	5.68825	5.94909
ENSG00000118496.4	FBXO30	2.51565	2.66541
ENSG00000103264.11	FBXO31	3.94435	3.87597
ENSG00000156804.3	FBXO32	6.29696	5.26874
ENSG00000153832.7	FBXO36	0.956472	1.04585
ENSG00000037637.6	FBXO42	3.30005	3.31293
ENSG00000072803.13	FBXW11	4.34589	4.41249
ENSG00000174989.8	FBXW8	2.70701	2.60983
ENSG00000104870.8	FCGRT	5.14723	5.33572
ENSG00000137478.10	FCHSD2	3.54362	3.80469
ENSG00000162746.10	FCRLB	0.491506	0.716679
ENSG00000137714.2	FDX1	2.29916	2.65276
ENSG00000151422.8	FER	3.04319	3.03147
ENSG00000149781.8	FERMT3	5.31274	5.12278
ENSG00000182511.7	FES	1.84458	1.99837
ENSG00000139132.10	FGD4	2.81504	3.68298
ENSG00000113578.13	FGF1	4.67368	3.35227
ENSG00000138685.8	FGF2	3.10119	3.81631
ENSG00000077782.15	FGFR1	5.41555	5.72708
ENSG00000172456.12	FGGY	4.08749	4.05398
ENSG00000022267.12	FHL1	6.31721	6.81215
ENSG00000214253.4	FIS1	6.96434	6.73627
ENSG00000141756.14	FKBP10	6.89928	7.09852
ENSG00000119321.4	FKBP15	3.49936	3.55713
ENSG00000196924.10	FLNA	9.1068	8.80526
ENSG00000136068.10	FLNB	3.46476	3.58258
ENSG00000119686.5	FLVCR2	2.66041	3.76689
ENSG00000059122.12	FLYWCH1	3.93877	4.28272
ENSG00000248905.4	FMN1	3.69529	2.86817
ENSG00000155816.15	FMN2	3.66447	4.06289
ENSG00000157827.15	FMNL2	2.33392	3.04358
ENSG00000102531.12	FNDC3A	3.83832	4.16499
ENSG00000075420.8	FNDC3B	5.01185	5.4493
ENSG00000065970.4	FOXJ2	2.64956	2.53565
ENSG00000198815.4	FOXJ3	4.61685	4.89496
ENSG00000164916.9	FOXK1	2.41012	2.3857
ENSG00000141568.15	FOXK2	4.34518	4.31788
ENSG00000111206.8	FOXM1	3.9511	4.16405
ENSG00000170802.11	FOXN2	2.48096	2.43431
ENSG00000150907.6	FOXO1	3.54293	3.83434
ENSG00000148690.10	FRA10AC1	5.31128	5.21832
ENSG00000172159.11	FRMD3	1.64791	3.51214
ENSG00000139926.11	FRMD6	5.60163	5.47047
ENSG00000126391.9	FRMD8	3.52775	3.36622
ENSG00000166225.4	FRS2	2.5041	2.5043
ENSG00000137218.6	FRS3	1.68585	1.36844
ENSG00000075539.9	FRYL	3.69893	3.59699
ENSG00000140718.14	FTO	5.06875	5.09666
ENSG00000068438.10	FTSJ1	6.17558	6.00171
ENSG00000140564.6	FURIN	4.78786	4.66534
ENSG00000165060.7	FXN	3.32673	3.49814
ENSG00000010810.13	FYN	7.44018	7.60381
ENSG00000105325.9	FZR1	3.93491	3.9006
ENSG00000092140.10	G2E3	3.15362	4.07966
ENSG00000145907.10	G3BP1	5.50889	5.476
ENSG00000033327.8	GAB2	2.91112	2.83706
ENSG00000143891.12	GALM	2.63491	2.69815
ENSG00000141429.9	GALNT1	5.65576	5.8185
ENSG00000164574.11	GALNT10	4.46193	4.16383
ENSG00000143641.8	GALNT2	5.52542	5.74291
ENSG00000136542.4	GALNT5	3.7503	3.97982
ENSG00000109586.7	GALNT7	4.67481	4.71471
ENSG00000213930.7	GALT	3.38598	3.48082
ENSG00000258728.1	GALT	0.173825	0.202389
ENSG00000214013.5	GANC	3.10467	3.68507
ENSG00000165219.17	GAPVD1	3.19704	3.33657
ENSG00000167491.13	GATAD2A	5.14009	5.18225
ENSG00000177628.11	GBA	4.77931	4.84282
ENSG00000146729.5	NIPSNAP2	4.99241	4.8113
ENSG00000107862.4	GBF1	3.96726	3.96839
ENSG00000179562.2	GCC1	2.44742	2.47833
ENSG00000089154.6	GCN1	4.35984	4.72309
ENSG00000057608.12	GDI2	7.06805	7.30787
ENSG00000179409.6	GEMIN4	2.69233	2.8667
ENSG00000164347.13	GFM2	4.24043	4.65447
ENSG00000198380.8	GFPT1	4.38321	4.7225
ENSG00000131459.8	GFPT2	5.06877	5.16769
ENSG00000100083.14	GGA1	4.66383	4.5326
ENSG00000103365.11	GGA2	4.82612	4.96184
ENSG00000101193.6	GID8	4.85496	4.81043
ENSG00000137960.5	GIPC2	1.2868	1.1532
ENSG00000182963.5	GJC1	2.6861	2.67731
ENSG00000198835.3	GJC2	0.345034	0.210889
ENSG00000176402.5	GJC3	0.0509941	0.0566378
ENSG00000183153.5	GJD3	0.154022	0.113855
ENSG00000175066.11	GK5	2.60989	3.73924
ENSG00000170266.11	GLB1	5.76359	5.42008
ENSG00000090863.7	GLG1	5.09762	5.21772
ENSG00000074047.16	GLI2	0.457243	0.979271
ENSG00000250571.2	GLI4	3.09775	2.95653
ENSG00000126603.4	GLIS2	2.68752	2.71059
ENSG00000107249.17	GLIS3	2.40622	2.89556
ENSG00000124767.6	GLO1	6.6628	6.70873
ENSG00000115419.8	GLS	6.23744	5.7975
ENSG00000063169.6	BICRA	2.01538	1.88958
ENSG00000112624.8	BICRAL	1.74858	1.93754
ENSG00000148672.7	GLUD1	4.80969	4.97306
ENSG00000101216.6	GMEB2	2.09582	1.96937
ENSG00000120063.5	GNA13	3.3158	3.33806
ENSG00000127955.11	GNAI1	4.03283	4.16891
ENSG00000156052.6	GNAQ	3.20409	3.61004
ENSG00000078369.13	GNB1	7.79801	7.9905
ENSG00000172380.5	GNG12	5.41672	5.90994
ENSG00000174021.6	GNG5	7.29245	7.33455
ENSG00000134697.8	GNL2	7.42408	7.66791
ENSG00000130119.11	GNL3L	3.17353	3.04108
ENSG00000100522.4	GNPNAT1	4.78818	5.63584
ENSG00000144674.12	GOLGA4	4.68664	5.0317
ENSG00000116580.14	GON4L	3.07863	3.53912
ENSG00000120370.8	GORAB	2.67592	2.65875
ENSG00000108587.10	GOSR1	4.19426	4.29995
ENSG00000089916.13	GPATCH2L	2.72638	2.71979
ENSG00000063660.4	GPC1	7.31853	7.02505
ENSG00000125772.8	GPCPD1	2.32034	2.55296
ENSG00000115159.11	GPD2	2.82107	3.66505
ENSG00000183671.8	GPR1	3.37759	3.54119
ENSG00000125734.9	GPR108	5.28652	5.13655
ENSG00000020181.13	ADGRA2	2.02202	1.8886
ENSG00000152990.9	ADGRA3	3.98437	4.15686
ENSG00000158292.6	GPR153	5.18706	4.94958
ENSG00000163328.9	GPR155	1.76665	1.39621
ENSG00000180758.10	GPR157	2.64724	2.33627
ENSG00000184194.5	GPR173	1.72191	1.27781
ENSG00000171659.9	GPR34	0.16136	0.0874589
ENSG00000171657.5	GPR82	0.0171034	0.00327686
ENSG00000138271.4	GPR87	0.0440484	0.00779924
ENSG00000160360.7	GPSM1	3.62147	3.52433
ENSG00000166123.9	GPT2	3.50076	3.7305
ENSG00000023171.10	GRAMD1B	1.58416	1.89082
ENSG00000155324.5	GRAMD2B	5.62326	5.07492
ENSG00000177885.9	GRB2	5.52741	5.62557
ENSG00000105464.3	GRIN2D	0.529354	1.12387
ENSG00000116032.5	GRIN3B	0.122801	0.0953001
ENSG00000198873.10	GRK5	1.03863	1.69688
ENSG00000132463.9	GRSF1	6.31102	6.38009
ENSG00000131149.13	GSE1	3.77291	3.88979
ENSG00000082701.10	GSK3B	4.52532	4.68643
ENSG00000148180.12	GSN	7.35553	7.22767
ENSG00000104687.8	GSR	5.0756	5.08851
ENSG00000121964.10	GTDC1	3.8825	3.72124
ENSG00000153767.5	GTF2E1	3.26903	3.32083
ENSG00000197265.4	GTF2E2	5.36511	5.73588
ENSG00000125651.9	GTF2F1	5.67526	5.60707
ENSG00000188342.7	GTF2F2	5.74876	5.51439
ENSG00000111358.9	GTF2H3	4.01166	4.21099
ENSG00000077809.8	GTF2I	5.94319	5.93816
ENSG00000006704.6	GTF2IRD1	4.42325	4.11507
ENSG00000077235.13	GTF3C1	5.17103	5.02571
ENSG00000155115.6	GTF3C6	5.68346	5.70367
ENSG00000172432.14	GTPBP2	4.43034	4.58664
ENSG00000130299.12	GTPBP3	2.3215	2.21783
ENSG00000163607.10	GTPBP8	3.69753	3.87509
ENSG00000138867.12	GUCD1	5.3532	5.13407
ENSG00000163754.13	GYG1	5.13393	5.171
ENSG00000136732.10	GYPC	4.64961	4.84727
ENSG00000104812.10	GYS1	6.73438	6.73697
ENSG00000105968.14	H2AFV	6.4939	6.30223
ENSG00000113648.12	H2AFY	6.19709	6.17101
ENSG00000049239.8	H6PD	4.40486	4.57646
ENSG00000084754.6	HADHA	5.97068	6.02504
ENSG00000063854.8	HAGH	5.16482	4.94442
ENSG00000103253.13	HAGHL	3.10145	2.93505
ENSG00000137814.5	HAUS2	3.59388	3.93217
ENSG00000172534.9	HCFC1	3.39809	3.22993
ENSG00000180353.6	HCLS1	0.923129	2.98728
ENSG00000068024.12	HDAC4	2.28177	2.43612
ENSG00000108840.11	HDAC5	3.96626	4.06046
ENSG00000061273.13	HDAC7	4.96634	5.24738
ENSG00000147099.15	HDAC8	4.02414	4.02982
ENSG00000115677.12	HDLBP	9.4099	9.6298
ENSG00000013583.4	HEBP1	5.23989	5.33814
ENSG00000092148.8	HECTD1	5.75919	5.98634
ENSG00000163312.6	HELQ	2.93334	2.96988
ENSG00000198265.7	HELZ	2.52497	2.79482
ENSG00000122557.5	HERPUD2	4.34904	4.25953
ENSG00000049860.9	HEXB	5.90273	6.20669
ENSG00000168517.6	HEXIM2	2.17653	2.09
ENSG00000163909.6	HEYL	5.61618	5.24047
ENSG00000196312.7	MFSD14C	1.90877	1.39471
ENSG00000169635.5	HIC2	0.489148	0.434941
ENSG00000127946.12	HIP1	3.90096	4.10593
ENSG00000130787.9	HIP1R	2.36561	2.38229
ENSG00000064393.11	HIPK2	4.86442	5.07751
ENSG00000110422.7	HIPK3	4.04514	4.01435
ENSG00000095951.12	HIVEP1	2.25211	1.93812
ENSG00000010818.4	HIVEP2	2.75757	2.91477
ENSG00000156515.17	HK1	7.42972	7.27215
ENSG00000159399.5	HK2	3.50496	3.34201
ENSG00000159267.10	HLCS	2.68707	2.78854
ENSG00000071794.11	HLTF	3.75977	3.91636
ENSG00000101294.12	HM13	7.07052	7.06286
ENSG00000183624.9	HMCES	3.95107	3.8885
ENSG00000140382.10	HMG20A	3.8143	3.96953
ENSG00000117305.10	HMGCL	4.15111	4.24398
ENSG00000113716.8	HMGXB3	3.70852	3.61923
ENSG00000103415.7	HMOX2	5.27693	5.34863
ENSG00000206053.8	JPT2	4.46114	4.61016
ENSG00000169813.12	HNRNPF	6.53238	6.41346
ENSG00000099783.7	HNRNPM	8.24091	8.09693
ENSG00000125944.14	HNRNPR	7.37227	7.59027
ENSG00000105323.12	HNRNPUL1	7.79838	8.08245
ENSG00000105997.18	HOXA3	1.23679	1.32199
ENSG00000198353.6	HOXC4	3.34508	2.99637
ENSG00000273266.1	HOXC4	0.754866	0.492127
ENSG00000115756.8	HPCAL1	4.47156	4.40943
ENSG00000110756.13	HPS5	3.5508	3.60561
ENSG00000168453.10	HR	3.07194	2.80907
ENSG00000196639.6	HRH1	1.54662	1.46121
ENSG00000118960.8	HS1BP3	3.09434	3.00856
ENSG00000153976.2	HS3ST3A1	1.59212	2.15327
ENSG00000125430.4	HS3ST3B1	1.86122	2.41769
ENSG00000108786.6	HSD17B1	2.45302	2.2264
ENSG00000185122.6	HSF1	5.32839	5.48809
ENSG00000160207.4	HSF2BP	1.64839	1.52156
ENSG00000170801.5	HTRA3	5.60985	5.26873
ENSG00000198331.6	HYLS1	2.35967	2.44316
ENSG00000138413.9	IDH1	3.74477	3.91554
ENSG00000163565.14	IFI16	6.58824	6.48485
ENSG00000165948.6	IFI27L1	3.62736	4.03823
ENSG00000216490.3	IFI30	1.61054	4.01653
ENSG00000126709.10	IFI6	5.69906	5.63749
ENSG00000142089.11	IFITM3	9.36028	9.14687
ENSG00000163913.7	IFT122	4.67221	5.13647
ENSG00000140443.9	IGF1R	3.12041	3.77677
ENSG00000159217.5	IGF2BP1	1.32189	1.44325
ENSG00000073792.11	IGF2BP2	5.88555	6.48643
ENSG00000136231.9	IGF2BP3	2.77995	3.7651
ENSG00000163453.7	IGFBP7	7.39266	7.10606
ENSG00000166130.10	IKBIP	4.98596	5.32326
ENSG00000143466.9	IKBKE	1.45746	1.78714
ENSG00000073009.8	IKBKG	3.47981	3.28387
ENSG00000115594.7	IL1R1	5.17441	5.53867
ENSG00000196083.5	IL1RAP	1.98036	2.35263
ENSG00000115598.5	IL1RL2	0.284598	0.379284
ENSG00000162892.11	IL24	0.283588	0.517799
ENSG00000077238.9	IL4R	4.64113	4.5435
ENSG00000160712.8	IL6R	0.572431	1.08935
ENSG00000134352.15	IL6ST	6.98355	7.48126
ENSG00000168685.10	IL7R	2.78036	3.68499
ENSG00000143621.12	ILF2	7.06537	6.94073
ENSG00000136718.5	IMP4	5.80503	5.89452
ENSG00000104331.4	IMPAD1	4.88527	5.0763
ENSG00000106348.12	IMPDH1	4.24457	4.25694
ENSG00000071243.11	ING3	3.03148	3.20577
ENSG00000168395.10	ING5	4.06458	4.23285
ENSG00000068383.14	INPP5A	2.54904	2.72698
ENSG00000198825.7	INPP5F	2.65359	2.89279
ENSG00000108506.7	INTS2	2.02273	2.03197
ENSG00000185085.2	INTS5	2.71877	2.71062
ENSG00000102786.10	INTS6	4.06946	4.26365
ENSG00000164066.8	INTU	1.43461	1.42843
ENSG00000119509.8	INVS	2.05743	2.2672
ENSG00000151151.5	IPMK	2.01921	1.99081
ENSG00000205339.5	IPO7	5.71171	5.84966
ENSG00000133704.5	IPO8	4.56373	4.568
ENSG00000198700.5	IPO9	5.65268	5.81252
ENSG00000140575.8	IQGAP1	7.58801	7.62015
ENSG00000124313.8	IQSEC2	2.75595	2.77919
ENSG00000134070.4	IRAK2	0.952395	1.189
ENSG00000136381.8	IREB2	4.1007	4.18654
ENSG00000168310.6	IRF2	3.40035	3.64967
ENSG00000169047.5	IRS1	4.29711	4.22722
ENSG00000078747.8	ITCH	3.85498	4.02273
ENSG00000143127.8	ITGA10	4.58511	4.45992
ENSG00000164171.6	ITGA2	0.23	2.12616
ENSG00000161638.6	ITGA5	7.06828	7.57873
ENSG00000091409.10	ITGA6	6.39651	6.41474
ENSG00000150093.14	ITGB1	10.3869	10.7328
ENSG00000119185.8	ITGB1BP1	6.79305	6.69773
ENSG00000082781.7	ITGB5	7.5818	7.78
ENSG00000115221.6	ITGB6	4.61354	4.50131
ENSG00000198542.9	ITGBL1	7.70782	6.90129
ENSG00000096433.6	ITPR3	3.25904	3.06976
ENSG00000198399.10	ITSN2	3.0923	3.23583
ENSG00000163166.9	IWS1	4.67095	4.7879
ENSG00000162434.7	JAK1	5.33128	6.06612
ENSG00000166086.8	JAM3	6.20591	5.99412
ENSG00000008083.9	JARID2	1.85779	2.19872
ENSG00000153814.7	JAZF1	2.42098	2.75436
ENSG00000140044.8	JDP2	4.68392	4.79174
ENSG00000050130.13	JKAMP	5.27011	5.61777
ENSG00000171988.13	JMJD1C	4.17394	4.13647
ENSG00000167476.6	JSRP1	6.66453	6.30963
ENSG00000120071.8	KANSL1	3.54439	3.52022
ENSG00000114982.13	KANSL3	3.24882	3.0928
ENSG00000114166.7	KAT2B	3.06503	3.10581
ENSG00000103510.15	KAT8	3.98795	3.76735
ENSG00000102781.9	KATNAL1	3.29531	3.26247
ENSG00000123444.9	KBTBD4	2.70181	2.71792
ENSG00000176407.13	KCMF1	5.0963	5.31173
ENSG00000026559.9	KCNG1	1.8188	2.35978
ENSG00000157551.13	KCNJ15	2.95016	3.06508
ENSG00000123700.4	KCNJ2	0.573858	1.53999
ENSG00000157542.8	KCNJ6	3.138	2.93405
ENSG00000104783.7	KCNN4	1.4752	0.805984
ENSG00000185760.11	KCNQ5	2.30373	1.81931
ENSG00000156486.7	KCNS2	0.179815	0.826078
ENSG00000134504.8	KCTD1	2.9568	2.84926
ENSG00000110906.8	KCTD10	4.94876	5.14677
ENSG00000100379.13	KCTD17	3.92847	3.94229
ENSG00000180901.6	KCTD2	2.91722	2.99871
ENSG00000167977.4	KCTD5	4.47515	4.4622
ENSG00000165097.9	KDM1B	3.69427	3.75186
ENSG00000173120.10	KDM2A	4.29327	4.19793
ENSG00000127663.10	KDM4B	3.9146	3.65959
ENSG00000132510.6	KDM6B	2.72047	2.71779
ENSG00000119537.11	KDSR	4.24701	4.45706
ENSG00000079999.9	KEAP1	5.53528	5.45916
ENSG00000100441.5	KHNYN	3.59004	3.55463
ENSG00000081791.4	DELE1	4.85259	4.75805
ENSG00000145016.9	RUBCN	2.36011	2.24207
ENSG00000166398.8	KIAA0355	2.9198	2.73293
ENSG00000136813.10	ECPAS	6.00717	6.54599
ENSG00000100578.10	KIAA0586	2.92296	3.05683
ENSG00000100364.14	KIAA0930	4.25651	4.05492
ENSG00000136051.9	WASHC4	4.7638	4.93137
ENSG00000198954.4	KIF1BP	5.54647	5.60396
ENSG00000164323.8	CFAP97	4.17109	4.7516
ENSG00000107036.7	RIC1	2.7791	3.0248
ENSG00000149633.7	KIAA1755	2.37109	1.5942
ENSG00000173214.5	MFSD4B	0.857287	0.893171
ENSG00000134313.10	KIDINS220	4.16019	4.07305
ENSG00000137177.14	KIF13A	4.58148	4.44689
ENSG00000197892.8	KIF13B	3.35527	2.93533
ENSG00000163808.12	KIF15	2.69549	2.67913
ENSG00000089177.13	KIF16B	2.27624	2.37744
ENSG00000129250.7	KIF1C	6.16406	5.93697
ENSG00000075945.8	KIFAP3	3.81828	3.76513
ENSG00000237649.3	KIFC1	4.1973	4.02007
ENSG00000140859.11	KIFC3	4.28136	4.34733
ENSG00000183853.13	KIRREL1	4.3483	4.34073
ENSG00000049130.9	KITLG	2.04711	4.15195
ENSG00000172059.6	KLF11	1.2788	1.16364
ENSG00000118922.12	KLF12	2.53096	2.96275
ENSG00000169926.5	KLF13	5.78062	5.32225
ENSG00000102554.9	KLF5	5.92444	6.37478
ENSG00000118263.10	KLF7	4.19872	4.67825
ENSG00000117153.11	KLHL12	3.48076	3.56565
ENSG00000114648.7	KLHL18	3.31594	3.25717
ENSG00000183655.11	KLHL25	1.98827	1.40114
ENSG00000119771.10	KLHL29	1.82732	2.21983
ENSG00000087448.5	KLHL42	2.47178	2.37468
ENSG00000122550.13	KLHL7	4.22952	4.29656
ENSG00000204775.4	KM-PA-2	0.00734563	0.00296828
ENSG00000055609.13	KMT2C	3.03473	2.77693
ENSG00000167548.10	KMT2D	4.12841	4.17009
ENSG00000005483.15	KMT2E	3.96617	4.1615
ENSG00000102753.5	KPNA3	4.43443	4.83811
ENSG00000172086.7	KRCC1	4.67968	4.68629
ENSG00000167767.9	KRT80	2.94121	3.63084
ENSG00000126777.13	KTN1	6.55298	6.68049
ENSG00000101680.9	LAMA1	0.455272	1.55919
ENSG00000196569.7	LAMA2	7.07915	6.78209
ENSG00000112769.14	LAMA4	2.0449	5.60424
ENSG00000130702.9	LAMA5	5.03175	4.94072
ENSG00000058085.10	LAMC2	1.40661	1.95232
ENSG00000188186.6	LAMTOR4	6.12978	6.02955
ENSG00000068697.6	LAPTM4A	8.48562	8.27632
ENSG00000104341.12	LAPTM4B	4.78721	4.75375
ENSG00000155506.12	LARP1	6.569	7.07831
ENSG00000011376.5	LARS2	2.58738	2.76731
ENSG00000150457.7	LATS2	3.82056	3.84905
ENSG00000204381.7	LAYN	3.77693	4.68304
ENSG00000205629.7	LCMT1	5.24636	4.99605
ENSG00000130164.7	LDLR	3.51982	3.40191
ENSG00000179241.8	LDLRAD3	4.5992	4.41158
ENSG00000105617.3	LENG1	2.76096	2.52759
ENSG00000090530.5	P3H2	2.69362	6.09147
ENSG00000168924.10	LETM1	3.06787	3.174
ENSG00000165046.8	LETM2	3.58321	3.68846
ENSG00000183722.7	LHFPL6	4.58801	5.20774
ENSG00000145685.9	LHFPL2	3.38908	2.90004
ENSG00000121897.9	LIAS	2.98984	2.85304
ENSG00000113594.5	LIFR	2.1625	2.44647
ENSG00000050405.9	LIMA1	6.88358	6.9263
ENSG00000144791.5	LIMD1	2.49891	2.64051
ENSG00000106683.10	LIMK1	4.23323	4.02928
ENSG00000182541.13	LIMK2	3.55008	3.343
ENSG00000169756.12	LIMS1	5.4572	5.47298
ENSG00000256977.6	LIMS3	0.000618237	0.000395762
ENSG00000152022.7	LIX1L	3.89248	3.78068
ENSG00000139636.11	LMBR1L	4.23331	4.22879
ENSG00000103227.14	LMF1	3.27522	3.2981
ENSG00000100258.13	LMF2	4.53907	4.57089
ENSG00000176619.6	LMNB2	5.90457	5.78403
ENSG00000048540.10	LMO3	2.96475	3.11254
ENSG00000143013.8	LMO4	4.36036	4.78284
ENSG00000136153.15	LMO7	9.54588	9.32528
ENSG00000113441.11	LNPEP	1.95953	2.22999
ENSG00000154359.8	LONRF1	3.0657	3.2185
ENSG00000115318.7	LOXL3	4.567	4.32514
ENSG00000153395.5	LPCAT1	3.44033	4.0048
ENSG00000134324.7	LPIN1	2.98128	3.30389
ENSG00000101577.5	LPIN2	2.62856	2.92386
ENSG00000145012.8	LPP	3.0467	2.98173
ENSG00000129951.14	PLPPR3	0.38913	0.174634
ENSG00000136141.10	LRCH1	2.64974	2.6816
ENSG00000120256.5	LRP11	3.43626	4.04284
ENSG00000162337.7	LRP5	5.68832	5.21868
ENSG00000100068.7	LRP5L	1.58049	1.68577
ENSG00000138095.14	LRPPRC	5.88761	6.22507
ENSG00000137507.7	LRRC32	1.75293	2.17474
ENSG00000132128.12	LRRC41	4.77162	4.77423
ENSG00000163428.3	LRRC58	2.93486	3.04449
ENSG00000197147.8	LRRC8B	1.53013	1.67278
ENSG00000124831.14	LRRFIP1	7.01789	6.79059
ENSG00000093167.13	LRRFIP2	5.65234	5.91255
ENSG00000148356.9	LRSAM1	2.4759	2.43831
ENSG00000041802.6	LSG1	4.71887	4.68339
ENSG00000161654.5	LSM12	2.91825	2.96064
ENSG00000257103.4	LSM14A	5.90144	6.02287
ENSG00000204392.6	LSM2	5.242	5.08821
ENSG00000130520.6	LSM4	6.4962	6.39208
ENSG00000183011.9	NAA38	6.39248	6.29262
ENSG00000049323.11	LTBP1	4.89489	6.07177
ENSG00000168056.10	LTBP3	6.67706	7.09484
ENSG00000108848.11	LUC7L3	8.35268	8.44722
ENSG00000139329.4	LUM	6.4623	6.52278
ENSG00000169641.9	LUZP1	3.01826	3.04318
ENSG00000160932.6	LY6E	5.45416	5.89905
ENSG00000150556.12	LYPD6B	4.94311	4.10437
ENSG00000011009.6	LYPLA2	4.32819	4.12687
ENSG00000133800.4	LYVE1	1.76778	0.87723
ENSG00000127603.19	MACF1	7.81167	7.6668
ENSG00000002822.11	MAD1L1	3.96872	3.98183
ENSG00000090316.11	MAEA	5.0112	5.01313
ENSG00000197063.6	MAFG	3.09014	3.13638
ENSG00000165072.9	MAMDC2	4.5213	3.96806
ENSG00000161021.7	MAML1	4.44008	4.59272
ENSG00000184384.9	MAML2	2.29045	2.78138
ENSG00000112893.5	MAN2A1	4.71632	4.53039
ENSG00000109323.4	MANBA	3.17837	3.16379
ENSG00000101363.8	MANBAL	5.09058	5.10424
ENSG00000189221.5	MAOA	3.39057	4.33437
ENSG00000131711.10	MAP1B	4.44161	4.50442
ENSG00000169032.5	MAP2K1	5.19735	5.19203
ENSG00000065559.10	MAP2K4	3.48002	3.36703
ENSG00000095015.5	MAP3K1	0.934928	0.7525
ENSG00000169967.12	MAP3K2	2.65078	2.67726
ENSG00000085511.15	MAP3K4	4.76697	4.80371
ENSG00000197442.8	MAP3K5	6.10044	5.89157
ENSG00000142733.10	MAP3K6	4.53529	3.9861
ENSG00000156265.11	MAP3K7CL	6.06605	5.98779
ENSG00000047849.17	MAP4	6.75308	6.79579
ENSG00000012983.7	MAP4K5	4.24912	4.30226
ENSG00000100030.10	MAPK1	5.74563	5.90875
ENSG00000185386.10	MAPK11	1.54727	1.38052
ENSG00000188130.9	MAPK12	3.55897	3.59506
ENSG00000156711.12	MAPK13	1.24643	1.75047
ENSG00000069956.7	MAPK6	4.69298	4.72201
ENSG00000107643.11	MAPK8	5.21837	5.04582
ENSG00000138834.8	MAPK8IP3	5.00518	4.98226
ENSG00000050748.13	MAPK9	4.24039	4.27888
ENSG00000119487.12	MAPKAP1	6.34367	6.33998
ENSG00000114738.6	MAPKAPK3	4.66276	5.02524
ENSG00000137802.9	MAPKBP1	2.05266	1.99755
ENSG00000173838.7	40238	0.865938	0.792486
ENSG00000173926.5	37681	3.95803	3.49944
ENSG00000072518.16	MARK2	2.85313	2.88642
ENSG00000007047.10	MARK4	4.1197	3.98792
ENSG00000140832.5	MARVELD3	0.095275	0.0531564
ENSG00000120539.10	MASTL	3.03817	3.10637
ENSG00000015479.13	MATR3	7.70314	7.84698
ENSG00000125952.14	MAX	6.1947	6.23157
ENSG00000180611.6	MB21D2	1.36171	1.17016
ENSG00000134046.7	MBD2	6.55047	6.83356
ENSG00000151332.14	MBIP	3.95176	4.3032
ENSG00000152601.13	MBNL1	5.78741	6.27646
ENSG00000139793.14	MBNL2	3.8886	3.90161
ENSG00000011258.11	MBTD1	2.22211	2.07057
ENSG00000131844.11	MCCC2	3.41681	3.57152
ENSG00000180398.7	MCFD2	6.15106	6.7952
ENSG00000076003.4	MCM6	3.86306	4.19136
ENSG00000147316.8	MCPH1	2.77436	3.07526
ENSG00000135272.5	MDFIC	3.9176	4.41891
ENSG00000146701.7	MDH2	7.47995	7.24438
ENSG00000151376.12	ME3	2.58675	2.09934
ENSG00000169057.15	MECP2	3.16534	3.22239
ENSG00000125686.7	MED1	3.63022	3.84885
ENSG00000108510.5	MED13	3.00189	3.00013
ENSG00000180182.6	MED14	4.37181	4.40145
ENSG00000175221.10	MED16	4.03592	3.99821
ENSG00000124641.10	MED20	3.64034	3.61653
ENSG00000160563.9	MED27	3.86081	3.62855
ENSG00000118579.7	MED28	4.5443	4.75686
ENSG00000141026.4	MED9	2.50361	2.21828
ENSG00000081189.9	MEF2C	5.68113	6.17705
ENSG00000165304.3	MELK	4.22404	4.24101
ENSG00000106511.5	MEOX2	0.478157	2.41004
ENSG00000117899.6	MESD	4.3414	4.46537
ENSG00000105976.10	MET	4.66368	4.6643
ENSG00000164024.7	METAP1	4.62299	4.84824
ENSG00000037897.12	METTL1	4.70469	4.912
ENSG00000181038.9	METTL23	4.36383	4.43393
ENSG00000165055.11	METTL2B	3.56258	3.89817
ENSG00000123600.14	METTL8	3.30533	4.2473
ENSG00000140545.10	MFGE8	7.5359	7.50579
ENSG00000147324.6	MFHAS1	1.85015	2.13126
ENSG00000118855.14	MFSD1	5.26204	5.53542
ENSG00000205639.5	MFSD2B	0.123716	0.318387
ENSG00000169026.8	SLC49A3	0.474334	0.651224
ENSG00000161013.12	MGAT4B	7.08483	6.94166
ENSG00000102858.8	MGRN1	4.06517	4.00118
ENSG00000154305.12	MIA3	6.61329	6.60935
ENSG00000133816.9	MICAL2	6.07769	5.95773
ENSG00000243156.3	MICAL3	2.92622	3.5066
ENSG00000165487.9	MICU2	5.26814	5.1809
ENSG00000105556.6	MIER2	2.76026	2.63779
ENSG00000107789.11	MINPP1	3.26244	3.30041
ENSG00000027001.7	MIPEP	3.47764	3.37662
ENSG00000196588.10	MRTFA	3.40526	3.16569
ENSG00000186260.12	MRTFB	1.91626	2.05778
ENSG00000128585.13	MKLN1	3.87802	3.91045
ENSG00000079277.15	MKNK1	4.41949	4.62042
ENSG00000076242.10	MLH1	5.31766	5.50226
ENSG00000119684.11	MLH3	3.36981	3.32765
ENSG00000168404.8	MLKL	1.6499	2.42401
ENSG00000130382.7	MLLT1	4.13572	4.21174
ENSG00000115648.9	MLPH	5.48855	5.24469
ENSG00000167965.13	MLST8	4.77498	4.60829
ENSG00000091436.12	MAP3K20	3.99668	4.95321
ENSG00000103150.4	MLYCD	2.23504	1.97893
ENSG00000196549.6	MME	7.30646	7.20535
ENSG00000155229.16	MMS19	5.1134	5.04543
ENSG00000146263.7	MMS22L	1.91635	2.2567
ENSG00000020426.6	MNAT1	5.69433	5.87371
ENSG00000114978.13	MOB1A	4.92092	4.92171
ENSG00000172081.9	MOB3A	3.73374	3.80241
ENSG00000080823.17	MOK	4.56944	5.06016
ENSG00000133422.8	MORC2	3.81031	3.75576
ENSG00000133131.10	MORC4	3.90832	3.68856
ENSG00000155363.14	MOV10	3.95246	3.91988
ENSG00000135698.5	MPHOSPH6	4.95214	5.54867
ENSG00000168303.6	MPLKIP	2.19603	2.1126
ENSG00000130830.10	MPP1	3.23229	3.38906
ENSG00000105926.11	MPP6	4.38329	5.03734
ENSG00000133030.15	MPRIP	7.3563	7.21318
ENSG00000158186.8	MRAS	7.21378	7.24639
ENSG00000129282.8	MRM1	2.19227	2.13239
ENSG00000166902.4	MRPL16	4.81248	4.84352
ENSG00000055950.12	MRPL43	5.64908	5.48067
ENSG00000259494.1	MRPL46	3.69622	3.80484
ENSG00000187145.10	MRPS21	5.87002	6.07015
ENSG00000125901.5	MRPS26	4.33029	4.1549
ENSG00000113048.12	MRPS27	5.17341	5.67145
ENSG00000243927.1	MRPS6	5.49517	5.8331
ENSG00000072952.14	MRVI1	1.02423	1.05614
ENSG00000120458.5	MSANTD2	3.20875	2.87894
ENSG00000066697.10	MSANTD3	5.01176	5.0801
ENSG00000113318.9	MSH3	2.45257	2.68576
ENSG00000153944.6	MSI2	5.93081	5.69694
ENSG00000174099.6	MSRB3	4.40763	4.4243
ENSG00000125459.10	MSTO1	2.51299	2.6806
ENSG00000163132.6	MSX1	1.79644	1.47315
ENSG00000147649.5	MTDH	6.44265	7.00829
ENSG00000122085.12	MTERF4	5.76354	5.8457
ENSG00000143033.13	MTF2	3.24655	3.29578
ENSG00000100714.11	MTHFD1	5.52853	5.59755
ENSG00000120254.11	MTHFD1L	5.2521	5.40281
ENSG00000065911.7	MTHFD2	5.70262	5.93494
ENSG00000163738.14	MTHFD2L	3.11513	3.52865
ENSG00000087053.14	MTMR2	3.89157	4.2195
ENSG00000198793.8	MTOR	3.341	3.37193
ENSG00000105887.10	MTPN	5.36201	5.55656
ENSG00000030304.8	MUSK	4.45733	4.45432
ENSG00000167508.6	MVD	4.1456	3.98396
ENSG00000059728.6	MXD1	0.895932	0.906229
ENSG00000123933.10	MXD4	5.16897	5.20209
ENSG00000185697.12	MYBL1	5.08809	4.56989
ENSG00000005810.13	MYCBP2	3.76374	3.99086
ENSG00000133026.8	MYH10	4.62746	4.93839
ENSG00000078814.11	MYH7B	0.9007	1.05522
ENSG00000101335.5	MYL9	8.50447	8.16282
ENSG00000065534.14	MYLK	5.78047	4.73745
ENSG00000145555.10	MYO10	3.97131	4.34209
ENSG00000128641.13	MYO1B	5.73947	5.93829
ENSG00000157483.4	MYO1E	5.80986	6.23471
ENSG00000197535.10	MYO5A	3.86153	4.06108
ENSG00000099331.9	MYO9B	6.9697	7.11171
ENSG00000138119.12	MYOF	6.42081	6.30622
ENSG00000138347.11	MYPN	4.37595	4.62164
ENSG00000099326.4	MZF1	2.55835	2.46221
ENSG00000152082.9	MZT2B	6.82031	7.02065
ENSG00000150456.6	EEF1AKMT1	3.45894	3.4603
ENSG00000164134.8	NAA15	3.69018	3.97947
ENSG00000111300.5	NAA25	2.71699	2.95839
ENSG00000139977.9	NAA30	2.80127	2.92094
ENSG00000110583.8	NAA40	4.10438	4.0892
ENSG00000121579.8	NAA50	6.02533	6.29294
ENSG00000139579.8	NABP2	4.63276	4.48876
ENSG00000196531.6	NACA	9.66977	9.7713
ENSG00000148411.3	NACC2	3.0096	2.66741
ENSG00000008130.11	NADK	4.38758	4.4519
ENSG00000152620.8	NADK2	3.59741	3.69524
ENSG00000159593.10	NAE1	5.52727	5.79299
ENSG00000108784.5	NAGLU	4.21929	4.13195
ENSG00000105835.7	NAMPT	6.06252	6.0908
ENSG00000105402.3	NAPA	7.06161	6.778
ENSG00000125814.13	NAPB	2.40725	2.3556
ENSG00000134265.8	NAPG	3.41105	3.68545
ENSG00000141562.13	NARF	5.14824	5.05265
ENSG00000137513.5	NARS2	3.67178	3.85184
ENSG00000109065.7	NAT9	4.09621	4.04205
ENSG00000134369.11	NAV1	3.56558	4.02045
ENSG00000166833.15	NAV2	3.65874	3.74463
ENSG00000067798.9	NAV3	4.30979	4.23398
ENSG00000144426.14	NBEAL1	3.2213	3.10994
ENSG00000104320.9	NBN	3.94369	4.02996
ENSG00000243452.3	NBPF15	2.54175	2.50262
ENSG00000188554.9	NBR1	5.26954	5.35051
ENSG00000149294.12	NCAM1	7.269	7.20546
ENSG00000144959.5	NCEH1	4.62443	4.29013
ENSG00000071051.9	NCK2	4.64566	4.36987
ENSG00000061676.10	NCKAP1	5.71495	5.84188
ENSG00000167566.12	NCKAP5L	3.87604	3.83597
ENSG00000125912.6	NCLN	4.84109	4.69942
ENSG00000124151.14	NCOA3	3.15622	3.18715
ENSG00000138293.15	NCOA4	5.51667	5.68814
ENSG00000124160.7	NCOA5	3.62845	3.56674
ENSG00000141027.16	NCOR1	4.84905	4.96981
ENSG00000196498.9	NCOR2	6.58017	6.48838
ENSG00000080986.8	NDC80	3.78701	3.8812
ENSG00000072864.8	NDE1	3.90047	3.86916
ENSG00000166579.11	NDEL1	6.31845	7.06297
ENSG00000104419.10	NDRG1	5.92468	6.52986
ENSG00000131495.4	NDUFA2	5.50668	5.30743
ENSG00000128609.10	NDUFA5	5.41441	5.59637
ENSG00000184983.5	NDUFA6	6.94563	6.79618
ENSG00000123545.5	NDUFAF4	4.21739	4.57681
ENSG00000156170.8	NDUFAF6	3.61622	3.49026
ENSG00000213619.5	NDUFS3	5.9128	5.87826
ENSG00000145494.7	NDUFS6	6.48431	6.33263
ENSG00000178127.8	NDUFV2	6.47743	6.96495
ENSG00000069869.11	NEDD4	4.29073	4.2632
ENSG00000255526.2	NEDD8-MDP1	4.3591	4.52504
ENSG00000119408.12	NEK6	5.1597	5.11861
ENSG00000119638.8	NEK9	4.55629	4.53446
ENSG00000173848.14	NET1	4.53056	4.41333
ENSG00000196712.12	NF1	3.52733	3.64716
ENSG00000186575.13	NF2	3.95809	4.04124
ENSG00000116044.11	NFE2L2	6.1508	6.24379
ENSG00000147862.10	NFIB	2.64382	3.08242
ENSG00000170322.10	NFRKB	2.65223	2.77642
ENSG00000086102.14	NFX1	3.67149	3.80594
ENSG00000170448.7	NFXL1	1.9692	2.38576
ENSG00000257108.1	NHLRC4	0.0031481	0
ENSG00000100138.9	SNU13	6.87785	6.92428
ENSG00000100503.19	NIN	3.81705	3.80018
ENSG00000101004.10	NINL	2.3665	2.38982
ENSG00000164190.12	NIPBL	5.54595	5.22744
ENSG00000136783.9	NIPSNAP3A	3.99736	4.11616
ENSG00000114857.13	NKTR	3.89377	4.439
ENSG00000123213.18	NLN	4.58216	4.80572
ENSG00000140853.11	NLRC5	2.74608	2.80302
ENSG00000091592.11	NLRP1	3.83174	3.55093
ENSG00000136448.7	NMT1	7.64566	7.8521
ENSG00000112992.12	NNT	5.12937	4.94442
ENSG00000173145.7	NOC3L	3.2125	3.50787
ENSG00000184967.2	NOC4L	3.97725	3.79
ENSG00000162408.10	NOL9	2.99622	3.1413
ENSG00000147140.11	NONO	9.43147	9.1859
ENSG00000087269.11	NOP14	4.46923	4.70905
ENSG00000111641.6	NOP2	5.01848	5.1619
ENSG00000142546.9	NOSIP	5.34035	5.32872
ENSG00000134250.13	NOTCH2	4.16578	4.30188
ENSG00000074181.4	NOTCH3	4.16651	4.39569
ENSG00000130751.5	NPAS1	2.25391	2.73411
ENSG00000141458.8	NPC1	3.73068	4.31086
ENSG00000107281.5	NPDC1	4.54275	4.66354
ENSG00000113971.14	NPHP3	4.69787	4.60703
ENSG00000254852.4	NPIPA2	0.0180104	0.0367686
ENSG00000185864.12	NPIPB4	0.831873	1.38191
ENSG00000182446.9	NPLOC4	5.73725	5.82058
ENSG00000113389.11	NPR3	3.02854	4.41499
ENSG00000114388.8	NPRL2	3.63109	3.78869
ENSG00000156642.12	NPTN	6.16246	6.30669
ENSG00000124588.15	NQO2	5.10824	4.66926
ENSG00000174738.8	NR1D2	3.28648	3.28128
ENSG00000025434.14	NR1H3	2.94186	3.03774
ENSG00000177463.11	NR2C2	2.75855	2.82105
ENSG00000123358.15	NR4A1	2.76807	3.94026
ENSG00000153234.9	NR4A2	1.22543	3.28324
ENSG00000185189.11	NRBP2	4.32687	4.20614
ENSG00000078618.15	NRDC	6.16598	6.12253
ENSG00000180530.5	NRIP1	2.15019	2.75133
ENSG00000118257.12	NRP2	4.71499	4.15074
ENSG00000073969.14	NSF	4.09004	4.33072
ENSG00000088833.13	NSFL1C	5.51274	5.67148
ENSG00000169189.12	NSMCE1	6.30563	6.29078
ENSG00000156831.3	NSMCE2	4.61771	4.81384
ENSG00000165802.15	NSMF	5.40027	5.44138
ENSG00000126653.11	NSRP1	5.30365	5.5815
ENSG00000241058.1	NSUN6	2.14519	2.02905
ENSG00000076685.14	NT5C2	5.93892	6.38525
ENSG00000168268.6	NT5DC2	6.65868	6.41744
ENSG00000111696.7	NT5DC3	3.70344	3.66428
ENSG00000205309.9	NT5M	2.4995	2.06127
ENSG00000182667.10	NTM	7.44521	6.77463
ENSG00000074590.9	NUAK1	3.84128	3.43754
ENSG00000103274.6	NUBP1	4.00003	3.9796
ENSG00000070081.11	NUCB2	6.61928	6.79953
ENSG00000069275.12	NUCKS1	7.50831	7.59488
ENSG00000090273.9	NUDC	6.1765	6.13436
ENSG00000120526.6	NUDCD1	4.60699	4.92253
ENSG00000015676.13	NUDCD3	4.83185	5.1284
ENSG00000136159.3	NUDT15	3.42989	3.54818
ENSG00000213965.3	NUDT19	2.4081	2.41201
ENSG00000173598.9	NUDT4	2.37976	2.17381
ENSG00000165609.8	NUDT5	5.99034	5.78428
ENSG00000170917.9	NUDT6	2.40234	2.38066
ENSG00000170502.8	NUDT9	4.50884	4.57833
ENSG00000108256.4	NUFIP2	5.49127	6.16724
ENSG00000137497.13	NUMA1	5.12991	5.0522
ENSG00000133961.15	NUMB	4.87375	5.4687
ENSG00000030066.9	NUP160	2.95108	3.31217
ENSG00000093000.14	NUP50	3.2881	3.64812
ENSG00000102900.8	NUP93	5.66299	5.73465
ENSG00000102898.7	NUTF2	7.37747	7.25387
ENSG00000143748.13	NVL	4.89396	5.17118
ENSG00000144815.10	NXPE3	4.32781	4.1881
ENSG00000205978.5	NYNRIN	0.17699	0.502431
ENSG00000184232.4	OAF	2.83953	3.24813
ENSG00000107960.6	STN1	4.27845	4.35609
ENSG00000115758.8	ODC1	6.29894	6.40124
ENSG00000136811.12	ODF2	4.44816	4.53322
ENSG00000105953.10	OGDH	4.75411	4.83044
ENSG00000181396.8	OGFOD3	4.45009	4.0455
ENSG00000119900.7	OGFRL1	3.4487	4.06749
ENSG00000198836.4	OPA1	5.57387	5.99033
ENSG00000123240.12	OPTN	5.63965	5.68607
ENSG00000182500.7	ORAI1	2.66339	2.6034
ENSG00000135336.10	ORC3	3.77762	4.13413
ENSG00000172057.5	ORMDL3	4.75198	4.58851
ENSG00000110048.7	OSBP	3.8815	4.15563
ENSG00000144645.9	OSBPL10	4.40424	3.93201
ENSG00000021762.15	OSBPL5	4.42723	4.01749
ENSG00000117859.14	OSBPL9	4.50175	4.80514
ENSG00000132823.6	OSER1	4.59277	4.39048
ENSG00000145623.8	OSMR	4.39029	4.97106
ENSG00000164920.5	OSR2	0.62851	2.2905
ENSG00000167770.7	OTUB1	5.26836	5.46652
ENSG00000169914.5	OTUD3	1.71781	1.69225
ENSG00000163113.10	OTUD7B	2.50861	2.44798
ENSG00000105261.5	OVOL3	0.0886156	0.035064
ENSG00000155463.8	OXA1L	5.75932	5.9978
ENSG00000083720.8	OXCT1	3.75419	4.2185
ENSG00000151093.3	OXSM	2.79477	2.87
ENSG00000172939.4	OXSR1	5.2062	5.21942
ENSG00000205022.5	PABPN1L	0.00359786	0.0155705
ENSG00000175115.7	PACS1	4.2157	4.20927
ENSG00000100266.13	PACSIN2	4.97692	4.79704
ENSG00000007168.8	PAFAH1B1	6.3586	6.48026
ENSG00000158006.9	PAFAH2	3.05962	2.89816
ENSG00000076641.4	PAG1	2.92293	3.18732
ENSG00000128050.4	PAICS	5.76866	6.17662
ENSG00000120727.8	PAIP2	6.86552	6.79491
ENSG00000149269.5	PAK1	5.75279	5.57761
ENSG00000145730.16	PAM	7.30933	7.57589
ENSG00000157881.9	PANK4	3.20428	3.04566
ENSG00000121274.8	TENT4B	2.82282	3.01425
ENSG00000112941.8	TENT4A	3.96693	3.9758
ENSG00000182752.8	PAPPA	0.843941	2.67496
ENSG00000138801.4	PAPSS1	6.08203	6.04987
ENSG00000116288.8	PARK7	8.50266	8.47525
ENSG00000140694.12	PARN	5.05854	5.27663
ENSG00000059378.8	PARP12	2.13681	2.16505
ENSG00000197702.7	PARVA	6.32654	6.17283
ENSG00000188677.10	PARVB	6.21121	5.77844
ENSG00000198807.8	PAX9	0.136943	0.820995
ENSG00000167081.12	PBX3	4.08378	4.0332
ENSG00000105717.9	PBX4	0.596786	0.685402
ENSG00000173599.9	PC	3.96192	4.17192
ENSG00000183570.12	PCBP3	5.05581	4.2711
ENSG00000090097.16	PCBP4	5.72454	5.70862
ENSG00000175198.10	PCCA	3.57785	3.59223
ENSG00000189184.7	PCDH18	2.50746	3.70434
ENSG00000242419.1	PCDHGC4	0.0197038	0.0215704
ENSG00000179715.8	PCED1B	1.61696	0.937854
ENSG00000165494.6	PCF11	4.30738	4.22364
ENSG00000185619.13	PCGF3	4.4831	4.25734
ENSG00000180628.10	PCGF5	4.41593	4.24947
ENSG00000100982.7	PCIF1	3.67891	3.31185
ENSG00000120265.12	PCMT1	6.207	6.35476
ENSG00000168300.9	PCMTD1	3.71879	3.70892
ENSG00000160299.12	PCNT	3.9497	3.59748
ENSG00000100731.11	PCNX1	5.33449	5.14628
ENSG00000126773.8	PCNX4	5.05937	5.06508
ENSG00000106244.8	PDAP1	6.98846	7.01376
ENSG00000197646.6	PDCD1LG2	2.43679	2.77748
ENSG00000071994.6	PDCD2	5.53226	5.75123
ENSG00000170248.9	PDCD6IP	7.52573	7.67663
ENSG00000112541.9	PDE10A	2.28404	1.80315
ENSG00000178104.15	PDE4DIP	7.22496	6.99894
ENSG00000171408.9	PDE7B	0.88155	2.3653
ENSG00000160191.13	PDE9A	1.50222	2.88427
ENSG00000145431.6	PDGFC	5.71713	5.0271
ENSG00000134853.7	PDGFRA	1.65681	4.62774
ENSG00000104213.8	PDGFRL	0.684986	1.20509
ENSG00000110435.7	PDHX	3.94668	4.13822
ENSG00000143870.8	PDIA6	7.50764	7.79159
ENSG00000005882.7	PDK2	5.14131	4.7134
ENSG00000004799.7	PDK4	1.37858	5.21944
ENSG00000163110.10	PDLIM5	5.63837	6.11585
ENSG00000140992.14	PDPK1	3.221	3.11713
ENSG00000121892.10	PDS5A	3.93624	4.14946
ENSG00000083642.14	PDS5B	4.43152	4.24367
ENSG00000179889.14	PDXDC1	4.01656	4.03451
ENSG00000160209.14	PDXK	4.86896	4.96626
ENSG00000174827.9	PDZK1	1.23962	1.12071
ENSG00000121440.10	PDZRN3	2.38362	3.44173
ENSG00000173517.6	PEAK1	3.96645	4.57556
ENSG00000187800.9	PEAR1	0.735946	1.07062
ENSG00000152684.10	PELO	3.33181	3.58048
ENSG00000133027.13	PEMT	4.32032	4.13454
ENSG00000142655.8	PEX14	3.43734	3.343
ENSG00000215193.8	PEX26	3.06501	3.07806
ENSG00000139197.6	PEX5	3.61315	3.66687
ENSG00000170525.14	PFKFB3	4.50833	4.17986
ENSG00000114268.7	PFKFB4	2.14267	2.79288
ENSG00000067057.12	PFKP	6.05566	6.52007
ENSG00000142657.16	PGD	7.95453	7.72017
ENSG00000101856.8	PGRMC1	5.99723	6.06695
ENSG00000164040.12	PGRMC2	5.88442	6.0705
ENSG00000134686.12	PHC2	6.28069	6.2514
ENSG00000043143.16	JADE2	2.54342	3.22075
ENSG00000077684.11	JADE1	3.1688	2.99829
ENSG00000119403.9	PHF19	3.65618	3.60948
ENSG00000197724.6	PHF2	2.80632	2.62611
ENSG00000025293.11	PHF20	3.50217	3.62079
ENSG00000135365.11	PHF21A	5.12008	5.36372
ENSG00000100410.3	PHF5A	5.19479	5.11736
ENSG00000067177.10	PHKA1	2.16626	2.32789
ENSG00000164776.5	PHKG1	1.40773	1.27834
ENSG00000019144.12	PHLDB1	4.6409	4.7364
ENSG00000176531.6	PHLDB3	2.12145	2.13882
ENSG00000081913.9	PHLPP1	2.60575	2.24138
ENSG00000070047.7	PHRF1	3.40221	3.39814
ENSG00000116793.11	PHTF1	3.60584	3.58984
ENSG00000107537.9	PHYH	4.1005	4.0758
ENSG00000175287.14	PHYHD1	5.02501	4.50952
ENSG00000175309.10	PHYKPL	4.10376	3.88127
ENSG00000038210.9	PI4K2B	5.15354	5.52969
ENSG00000105229.2	PIAS4	3.57905	3.54712
ENSG00000083535.11	PIBF1	3.7423	4.01925
ENSG00000100151.11	PICK1	1.67143	2.08182
ENSG00000153823.14	PID1	4.25454	4.36074
ENSG00000103335.15	PIEZO1	6.17314	5.90496
ENSG00000069943.5	PIGB	2.6956	3.18088
ENSG00000185808.9	PIGP	4.07325	3.96023
ENSG00000060642.6	PIGV	2.63242	2.55803
ENSG00000119227.3	PIGZ	1.54047	1.32019
ENSG00000051382.4	PIK3CB	2.93491	3.30779
ENSG00000171608.11	PIK3CD	2.61815	2.31345
ENSG00000117461.10	PIK3R3	2.76849	2.51343
ENSG00000196455.3	PIK3R4	3.71275	3.6665
ENSG00000115020.12	PIKFYVE	2.77634	3.04498
ENSG00000158828.5	PINK1	5.59464	5.44567
ENSG00000186111.4	PIP5K1C	3.30028	3.08894
ENSG00000167103.7	PIP5KL1	0.550054	0.796496
ENSG00000180957.13	PITPNB	4.87503	5.05713
ENSG00000154217.10	PITPNC1	2.97215	4.24258
ENSG00000110697.8	PITPNM1	3.87662	3.91557
ENSG00000090975.8	PITPNM2	1.3513	1.4598
ENSG00000198961.5	PJA2	4.60376	4.66286
ENSG00000008710.13	PKD1	5.43016	5.36496
ENSG00000168734.9	PKIG	3.96593	4.95587
ENSG00000123143.8	PKN1	5.57861	5.28074
ENSG00000160199.10	PKNOX1	4.31892	4.07839
ENSG00000165495.11	PKNOX2	4.03381	3.59292
ENSG00000153246.7	PLA2R1	2.32903	2.35632
ENSG00000137055.10	PLAA	4.43372	4.77386
ENSG00000189129.9	PLAC9	2.16926	3.09341
ENSG00000104368.13	PLAT	8.0904	6.85483
ENSG00000161714.7	PLCD3	5.34234	5.03426
ENSG00000138193.10	PLCE1	1.53875	1.66072
ENSG00000124181.10	PLCG1	5.13139	5.37814
ENSG00000129219.9	PLD2	3.39861	3.27261
ENSG00000178209.10	PLEC	5.72288	6.10578
ENSG00000107679.10	PLEKHA1	3.04428	3.13234
ENSG00000169499.10	PLEKHA2	4.14343	4.15022
ENSG00000116095.6	PLEKHA3	3.77463	3.75204
ENSG00000126822.11	PLEKHG3	1.19182	1.34934
ENSG00000107020.5	PLGRKT	4.99103	4.59006
ENSG00000147872.5	PLIN2	5.64838	6.1934
ENSG00000105355.4	PLIN3	8.11189	7.55289
ENSG00000166851.10	PLK1	5.49083	5.78971
ENSG00000152952.7	PLOD2	8.06012	8.43306
ENSG00000102024.13	PLS3	6.02195	6.49634
ENSG00000188313.8	PLSCR1	4.90443	5.01485
ENSG00000076356.6	PLXNA2	2.79494	3.30932
ENSG00000164050.8	PLXNB1	4.82771	4.63252
ENSG00000004399.8	PLXND1	6.18584	5.63539
ENSG00000124225.11	PMEPA1	4.09392	3.58405
ENSG00000140464.15	PML	4.52821	4.26809
ENSG00000140650.7	PMM2	4.93522	5.40031
ENSG00000109099.9	PMP22	5.99064	5.7279
ENSG00000064933.12	PMS1	4.08361	4.4453
ENSG00000164087.3	POC1A	2.57387	2.45473
ENSG00000128567.12	PODXL	4.31153	4.65598
ENSG00000101346.7	POFUT1	4.87975	5.0976
ENSG00000143442.17	POGZ	3.74828	3.79578
ENSG00000100227.13	POLDIP3	4.6771	4.76994
ENSG00000122008.11	POLK	3.37616	3.40795
ENSG00000068654.11	POLR1A	3.81847	3.83625
ENSG00000181222.10	POLR2A	6.19852	6.24042
ENSG00000099817.7	POLR2E	6.65715	6.54953
ENSG00000168002.7	POLR2G	6.0653	6.07957
ENSG00000148606.8	POLR3A	2.50871	2.69724
ENSG00000168495.8	POLR3D	4.28401	4.33408
ENSG00000121851.8	POLR3GL	5.41681	5.44184
ENSG00000100413.12	POLR3H	4.13905	4.26681
ENSG00000185900.5	POMK	1.4069	1.41692
ENSG00000105854.8	PON2	7.38037	7.3323
ENSG00000104356.6	POP1	2.53567	2.48822
ENSG00000105171.5	POP4	5.51094	5.522
ENSG00000132429.5	POPDC3	5.30204	5.25797
ENSG00000127948.9	POR	6.08619	5.41817
ENSG00000162407.8	PLPP3	5.74361	6.5837
ENSG00000112033.9	PPARD	3.92421	4.06944
ENSG00000132170.15	PPARG	1.3459	3.98798
ENSG00000131626.11	PPFIA1	5.25132	5.47371
ENSG00000110841.9	PPFIBP1	5.86308	5.95826
ENSG00000134283.13	PPHLN1	5.07364	5.448
ENSG00000100034.9	PPM1F	4.86452	5.07374
ENSG00000143224.13	PPOX	3.39541	3.27235
ENSG00000213639.5	PPP1CB	6.38503	6.03736
ENSG00000077157.16	PPP1R12B	2.83649	3.17809
ENSG00000125503.8	PPP1R12C	4.8522	4.81313
ENSG00000162869.11	PPP1R21	3.3373	3.15651
ENSG00000104695.8	PPP2CB	6.32236	6.52102
ENSG00000137713.11	PPP2R1B	3.33287	3.99567
ENSG00000221914.4	PPP2R2A	5.07614	5.56125
ENSG00000073711.6	PPP2R3A	2.37008	2.75122
ENSG00000119383.15	PTPA	5.26294	5.42078
ENSG00000066027.7	PPP2R5A	2.55566	2.73549
ENSG00000112640.10	PPP2R5D	4.93108	4.95659
ENSG00000149923.9	PPP4C	5.74136	5.53316
ENSG00000154845.11	PPP4R1	5.81698	6.06539
ENSG00000124224.12	PPP4R1L	2.25437	2.10075
ENSG00000163605.10	PPP4R2	4.80966	4.68502
ENSG00000011485.10	PPP5C	5.88886	6.28176
ENSG00000119414.7	PPP6C	5.30199	5.37693
ENSG00000105063.14	PPP6R1	4.93944	4.97368
ENSG00000110075.10	PPP6R3	4.68004	4.98331
ENSG00000214140.6	PRCD	0.863928	1.12253
ENSG00000152784.11	PRDM8	4.43265	3.91747
ENSG00000117450.9	PRDX1	8.66144	8.87728
ENSG00000085377.9	PREP	4.37709	4.35724
ENSG00000138078.11	PREPL	4.62636	4.83699
ENSG00000124126.9	PREX1	1.71379	2.53974
ENSG00000139174.6	PRICKLE1	2.94414	3.67751
ENSG00000163637.7	PRICKLE2	2.24777	2.27893
ENSG00000146143.13	PRIM2	3.26189	3.40163
ENSG00000132356.7	PRKAA1	4.88024	5.63529
ENSG00000111725.6	PRKAB1	3.29822	3.44641
ENSG00000072062.9	PRKACA	6.12258	6.03456
ENSG00000181929.7	PRKAG1	5.53925	5.88279
ENSG00000106617.9	PRKAG2	5.14312	5.48585
ENSG00000154229.7	PRKCA	2.92006	3.34312
ENSG00000163932.9	PRKCD	3.39545	3.4323
ENSG00000115825.5	PRKD3	2.96589	3.29086
ENSG00000253729.3	PRKDC	5.82143	5.73613
ENSG00000180228.8	PRKRA	5.12726	4.98554
ENSG00000126457.16	PRMT1	7.30313	7.39819
ENSG00000148426.8	PROSER2	3.41812	2.87943
ENSG00000196504.11	PRPF40A	6.80815	7.1936
ENSG00000110844.9	PRPF40B	3.70103	3.6384
ENSG00000112739.12	PRPF4B	5.34541	5.80976
ENSG00000161542.12	PRPSAP1	4.18702	4.22535
ENSG00000141127.10	PRPSAP2	3.77147	3.86563
ENSG00000126464.9	PRR12	2.13195	2.07328
ENSG00000156858.7	PRR14	5.29733	4.80786
ENSG00000184838.10	PRR16	5.49768	5.47581
ENSG00000164244.16	PRRC1	4.63908	4.80326
ENSG00000130723.13	PRRC2B	5.058	5.11335
ENSG00000163704.7	PRRT3	0.710271	0.878878
ENSG00000167157.9	PRRX2	0.224349	2.35222
ENSG00000150687.7	PRSS23	7.58018	6.28132
ENSG00000099256.14	PRTFDC1	1.84865	2.05577
ENSG00000106772.13	PRUNE2	5.97206	6.42802
ENSG00000156011.12	PSD3	3.3478	3.98473
ENSG00000080815.14	PSEN1	4.34471	4.47666
ENSG00000164985.10	PSIP1	6.38325	6.31026
ENSG00000159792.5	PSKH1	3.02765	3.12784
ENSG00000126067.7	PSMB2	5.09338	5.12532
ENSG00000136930.8	PSMB7	6.8935	6.94578
ENSG00000100519.7	PSMC6	6.07603	6.31019
ENSG00000173692.8	PSMD1	6.87729	6.90413
ENSG00000108671.5	PSMD11	5.70849	5.93123
ENSG00000185627.13	PSMD13	6.84253	6.90944
ENSG00000131467.6	PSME3	5.66183	5.97149
ENSG00000125818.13	PSMF1	7.18941	7.2322
ENSG00000146733.9	PSPH	4.51955	4.76417
ENSG00000117569.14	PTBP2	3.92176	3.76756
ENSG00000185920.11	PTCH1	1.74827	2.22738
ENSG00000171862.5	PTEN	5.05884	5.36406
ENSG00000165983.10	PTER	2.10937	2.68975
ENSG00000168229.3	PTGDR	0.0944299	0.466519
ENSG00000148344.10	PTGES	1.56662	4.24359
ENSG00000110958.11	PTGES3	6.68742	6.74083
ENSG00000160013.4	PTGIR	0.285403	0.308901
ENSG00000095303.10	PTGS1	1.94277	4.00697
ENSG00000073756.7	PTGS2	0.2681	0.922215
ENSG00000169398.15	PTK2	5.68009	6.00013
ENSG00000196396.5	PTPN1	4.56264	4.74104
ENSG00000127947.11	PTPN12	7.64962	7.33707
ENSG00000152104.7	PTPN14	3.95224	3.96283
ENSG00000072135.8	PTPN18	5.07431	5.045
ENSG00000134242.11	PTPN22	1.13497	2.05706
ENSG00000076201.10	PTPN23	3.65763	3.52953
ENSG00000111679.12	PTPN6	0.15609	0.189345
ENSG00000132670.16	PTPRA	5.23904	5.295
ENSG00000132334.12	PTPRE	1.92128	1.11231
ENSG00000142949.12	PTPRF	3.66974	3.28114
ENSG00000144724.14	PTPRG	3.91079	3.56866
ENSG00000149177.8	PTPRJ	1.37287	1.92021
ENSG00000139304.8	PTPRQ	2.87111	3.46438
ENSG00000105426.10	PTPRS	3.81972	4.07076
ENSG00000060656.15	PTPRU	4.82665	4.29539
ENSG00000141378.13	PTRH2	4.75311	4.90352
ENSG00000179950.9	PUF60	6.56913	6.39028
ENSG00000134644.11	PUM1	4.91913	4.93329
ENSG00000110060.4	PUS3	2.95431	3.18274
ENSG00000091127.9	PUS7	3.71951	4.34883
ENSG00000073008.10	PVR	5.26818	5.44891
ENSG00000177707.6	NECTIN3	4.24929	4.78637
ENSG00000241945.3	PWP2	3.35298	3.47643
ENSG00000130508.6	PXDN	6.53742	6.72091
ENSG00000100994.7	PYGB	5.31079	5.83598
ENSG00000100504.12	PYGL	5.93644	6.05729
ENSG00000213339.4	QTRT1	4.54236	4.36446
ENSG00000107560.6	RAB11FIP2	2.75249	3.44086
ENSG00000090565.11	RAB11FIP3	6.32433	5.9634
ENSG00000206418.3	RAB12	5.04198	4.96834
ENSG00000143545.4	RAB13	6.35089	6.75398
ENSG00000119396.6	RAB14	4.66103	4.89728
ENSG00000138069.12	RAB1A	7.54307	7.81374
ENSG00000080371.4	RAB21	5.06459	5.22022
ENSG00000124209.3	RAB22A	3.03218	2.90788
ENSG00000104388.10	RAB2A	6.43377	6.81976
ENSG00000137502.5	RAB30	2.59216	2.5186
ENSG00000168461.8	RAB31	4.81983	4.98591
ENSG00000118508.4	RAB32	4.36274	4.7485
ENSG00000169213.6	RAB3B	2.3038	2.10461
ENSG00000172476.3	RAB40A	0.58113	0.629773
ENSG00000172780.12	RAB43	0.982498	1.05531
ENSG00000075785.8	RAB7A	9.52457	9.88557
ENSG00000166128.8	RAB8B	6.46993	6.51656
ENSG00000136933.12	RABEPK	3.99008	4.22101
ENSG00000144134.14	RABL2A	2.01682	1.77458
ENSG00000169750.4	RAC3	1.79519	2.0171
ENSG00000070950.5	RAD18	2.89866	3.03825
ENSG00000164754.8	RAD21	6.00707	6.1667
ENSG00000164520.7	RAET1E	1.22445	1.31756
ENSG00000132155.7	RAF1	5.51731	5.4776
ENSG00000108557.13	RAI1	2.56245	2.6367
ENSG00000039560.9	RAI14	6.04095	6.51525
ENSG00000017797.7	RALBP1	4.32468	4.50006
ENSG00000031823.10	RANBP3	5.74894	5.87529
ENSG00000137040.8	RANBP6	2.93648	2.9417
ENSG00000127314.13	RAP1B	4.4123	4.57491
ENSG00000138698.10	RAP1GDS1	5.30553	5.15497
ENSG00000107263.14	RAPGEF1	5.5168	5.66807
ENSG00000173166.13	RAPH1	4.55241	4.35065
ENSG00000172819.12	RARG	3.23465	3.72332
ENSG00000155903.7	RASA2	2.24312	2.65841
ENSG00000185989.9	RASA3	4.39584	4.32218
ENSG00000075391.12	RASAL2	3.72007	3.91996
ENSG00000153179.7	RASSF3	3.25596	3.24312
ENSG00000107551.16	RASSF4	6.97011	6.76014
ENSG00000169435.9	RASSF6	0.0327256	0.0318075
ENSG00000161847.9	RAVER1	2.98542	2.95562
ENSG00000117222.9	RBBP5	2.42428	2.33849
ENSG00000122257.14	RBBP6	4.4241	4.5169
ENSG00000101773.12	RBBP8	4.19264	4.75484
ENSG00000100320.18	RBFOX2	4.93174	5.21197
ENSG00000119446.9	RBM18	4.5403	4.72176
ENSG00000122965.6	RBM19	3.1274	3.18779
ENSG00000139746.11	RBM26	4.18343	4.40599
ENSG00000106344.4	RBM28	4.92642	4.98811
ENSG00000132819.12	RBM38	3.86287	3.058
ENSG00000076067.7	RBMS2	4.31071	4.28789
ENSG00000144642.16	RBMS3	2.77861	2.92299
ENSG00000157110.11	RBPMS	4.18539	4.80518
ENSG00000135870.7	RC3H1	2.4238	2.0852
ENSG00000159200.13	RCAN1	4.59814	5.01335
ENSG00000180198.11	RCC1	4.33955	4.17133
ENSG00000142552.3	RCN3	7.69784	7.39783
ENSG00000167771.5	RCOR2	0.926227	1.34489
ENSG00000117625.9	RCOR3	4.84616	4.62397
ENSG00000198771.6	RCSD1	2.5322	3.00886
ENSG00000137710.10	RDX	7.00185	7.33844
ENSG00000122707.7	RECK	3.95868	4.28242
ENSG00000108469.10	RECQL5	3.04237	2.93923
ENSG00000165476.8	REEP3	4.04642	3.95635
ENSG00000129625.8	REEP5	6.48529	6.55397
ENSG00000181826.5	RELL1	2.30027	2.35825
ENSG00000139890.5	REM2	0.166643	0.159818
ENSG00000142599.13	RERE	4.72929	4.87462
ENSG00000084093.11	REST	3.17543	3.14178
ENSG00000079313.7	REXO1	4.6619	4.72372
ENSG00000035928.10	RFC1	5.94667	6.3941
ENSG00000111445.9	RFC5	3.4622	3.37142
ENSG00000131378.9	RFTN1	6.26027	5.9731
ENSG00000087903.8	RFX2	1.91559	1.852
ENSG00000196460.8	RFX8	3.59979	3.54256
ENSG00000064490.9	RFXANK	5.26913	5.23557
ENSG00000107185.8	RGP1	2.86383	3.0337
ENSG00000147509.9	RGS20	1.37944	2.46559
ENSG00000144468.12	RHBDD1	3.27411	3.39438
ENSG00000007384.11	RHBDF1	4.95368	4.84837
ENSG00000129667.8	RHBDF2	2.06886	2.13287
ENSG00000067560.6	RHOA	8.91769	8.81267
ENSG00000008853.12	RHOBTB2	2.39188	2.60147
ENSG00000164292.8	RHOBTB3	6.11311	5.95124
ENSG00000177105.9	RHOG	4.4365	4.36776
ENSG00000126858.12	RHOT1	4.34197	4.29276
ENSG00000158423.12	RIBC1	0.322454	0.34732
ENSG00000111785.14	RIC8B	2.34146	2.65422
ENSG00000188026.7	RILPL1	3.58423	3.51807
ENSG00000166532.11	RIMKLB	4.65891	4.50083
ENSG00000132669.8	RIN2	3.78577	3.81101
ENSG00000124784.4	RIOK1	4.18206	4.72133
ENSG00000101782.10	RIOK3	5.87802	5.99117
ENSG00000104312.6	RIPK2	3.12665	3.82744
ENSG00000117000.8	RLF	2.63102	2.42746
ENSG00000155906.12	RMND1	3.81044	4.32225
ENSG00000172922.4	RNASEH2C	4.82149	4.86012
ENSG00000121848.9	RNF115	4.01614	3.9814
ENSG00000070423.13	RNF126	5.0863	5.02807
ENSG00000181481.9	RNF135	2.79354	2.83512
ENSG00000110315.2	RNF141	3.83805	4.3312
ENSG00000145860.7	RNF145	5.07694	4.50681
ENSG00000138942.11	RNF185	3.18312	3.27316
ENSG00000155827.7	RNF20	4.43266	4.53815
ENSG00000158286.8	RNF207	1.02074	1.8775
ENSG00000173821.15	RNF213	4.30307	4.28082
ENSG00000011275.14	RNF216	3.71316	3.80138
ENSG00000146373.12	RNF217	2.9771	3.0687
ENSG00000101236.12	RNF24	3.12329	3.16677
ENSG00000170633.12	RNF34	4.16785	4.1169
ENSG00000137075.13	RNF38	3.12275	3.20406
ENSG00000063978.11	RNF4	4.94241	4.94936
ENSG00000181852.13	RNF41	4.50057	4.45312
ENSG00000114125.9	RNF7	5.98311	5.9823
ENSG00000171861.6	MRM3	3.13047	3.06293
ENSG00000154133.10	ROBO4	3.21795	3.43417
ENSG00000104237.6	RP1	0.0846512	0.136856
ENSG00000248751.2	RP1-130H16.18	0.882428	0.549135
ENSG00000260342.2	RP11-1035H13.3	1.85326	1.89691
ENSG00000171282.9	RP11-1055B8.7	1.45554	1.45681
ENSG00000232671.2	ZNF687-AS1	0.90324	0.78381
ENSG00000259080.1	RP11-158I13.2	0.25564	0.43196
ENSG00000266086.1	RP11-159D12.5	3.69397	3.77361
ENSG00000264278.1	ZNF236-DT	0.748929	0.611243
ENSG00000175604.2	RP11-276H1.3	0.00512536	0.0026206
ENSG00000256591.1	RP11-286N22.8	5.56245	5.60966
ENSG00000235531.5	MSC-AS1	3.12355	2.89513
ENSG00000255872.3	RP11-613M10.9	0.0674447	0.0590475
ENSG00000261567.1	RP11-680G10.1	2.09594	1.9915
ENSG00000153574.8	RPIA	3.50042	3.35049
ENSG00000166441.8	RPL27A	12.7347	12.195
ENSG00000071082.6	RPL31	11.3643	11.2257
ENSG00000163125.11	RPRD2	2.90258	3.10069
ENSG00000071242.7	RPS6KA2	4.88678	5.58351
ENSG00000177189.8	RPS6KA3	3.94426	4.42256
ENSG00000175634.10	RPS6KB2	4.57375	4.44969
ENSG00000198208.7	RPS6KL1	1.90882	1.9488
ENSG00000141564.9	RPTOR	2.78613	2.78729
ENSG00000156990.10	RPUSD3	4.46701	4.38778
ENSG00000144580.9	CNOT9	4.53585	4.8567
ENSG00000133818.8	RRAS2	6.49092	6.96432
ENSG00000125844.11	RRBP1	6.3308	6.12736
ENSG00000124782.15	RREB1	2.31743	2.1317
ENSG00000167325.10	RRM1	5.884	6.15759
ENSG00000189306.6	RRP7A	4.35055	3.63165
ENSG00000171490.8	RSL1D1	7.10917	7.48035
ENSG00000159579.9	RSPRY1	4.11735	3.97613
ENSG00000258366.3	RTEL1	2.85467	2.94911
ENSG00000026036.16	RTEL1-TNFRSF6B	0.667635	0.773035
ENSG00000114993.11	RTKN	3.67213	3.25628
ENSG00000115310.13	RTN4	9.84635	9.93713
ENSG00000018189.8	RUFY3	5.02394	4.97501
ENSG00000124813.16	RUNX2	4.7317	4.22718
ENSG00000198853.7	RUSC2	3.9711	3.92011
ENSG00000186350.8	RXRA	3.39997	2.98629
ENSG00000204231.6	RXRB	3.981	3.92732
ENSG00000189171.9	S100A13	7.72322	7.87292
ENSG00000267534.1	S1PR2	0.413423	0.993011
ENSG00000213694.3	S1PR3	2.63521	4.59328
ENSG00000125910.4	S1PR4	0.0231683	0.0245993
ENSG00000211456.6	SACM1L	4.4117	4.55652
ENSG00000142230.7	SAE1	6.77388	6.80015
ENSG00000160633.8	SAFB	5.47629	5.51196
ENSG00000130254.7	SAFB2	4.90833	5.08503
ENSG00000187634.6	SAMD11	3.01719	3.27667
ENSG00000179134.10	SAMD4B	6.40195	6.21463
ENSG00000161526.10	SAP30BP	6.26971	6.33751
ENSG00000111961.12	SASH1	2.42872	2.97001
ENSG00000119042.12	SATB2	2.11098	2.40548
ENSG00000151748.10	SAV1	4.04633	4.09665
ENSG00000100241.16	SBF1	4.17955	4.09206
ENSG00000133812.10	SBF2	3.51987	3.5951
ENSG00000064932.11	SBNO2	4.39632	4.39564
ENSG00000139218.13	SCAF11	5.778	5.67826
ENSG00000140497.12	SCAMP2	5.5441	5.59709
ENSG00000116521.6	SCAMP3	5.46973	5.63282
ENSG00000171222.6	SCAND1	5.13967	4.89084
ENSG00000114650.14	SCAP	4.16487	4.26757
ENSG00000184178.11	SCFD2	3.26525	3.37724
ENSG00000196876.9	SCN8A	3.38826	3.04532
ENSG00000111319.8	SCNN1A	0.829634	0.65702
ENSG00000136193.12	SCRN1	5.37503	5.95883
ENSG00000124145.5	SDC4	5.69874	5.38093
ENSG00000125775.10	SDCBP2	1.18399	1.33387
ENSG00000165689.12	ENTR1	5.06496	5.29238
ENSG00000073578.12	SDHA	5.68532	5.73653
ENSG00000146555.14	SDK1	1.46592	1.6906
ENSG00000129657.10	SEC14L1	5.58455	6.14573
ENSG00000100934.10	SEC23A	5.25995	5.57082
ENSG00000101310.10	SEC23B	4.32475	4.56132
[truncated: 715 more rows]

## Sheet: Repressed genes expression MB
Expression levels of repressed genes in MB
ENSEMBL	Gene Symbol	CN Log2 fpkm+1	FSHD1 Log2 fpkm+1
ENSG00000183044.7	ABAT	1.16387	1.07653
ENSG00000198691.7	ABCA4	0.423555	0.390325
ENSG00000118777.6	ABCG2	0.298494	0.0850286
ENSG00000143994.9	ABHD1	0.163345	0.284763
ENSG00000108798.4	ABI3	0.112996	0.083127
ENSG00000159842.10	ABR	5.51363	5.54759
ENSG00000166016.4	ABTB2	2.15514	2.17145
ENSG00000226321.3	CROCC2	0.122442	0.235347
ENSG00000269396.1	AC187652.1	0.490129	0.783008
ENSG00000157766.11	ACAN	3.49189	4.84315
ENSG00000110455.9	ACCS	2.40826	1.9511
ENSG00000153093.14	ACOXL	0.00874153	0.00524919
ENSG00000117148.6	ACTL8	0.0218639	0.0303369
ENSG00000132744.3	ACY3	0.0323345	0.0418034
ENSG00000151651.11	ADAM8	0.549123	0.376954
ENSG00000142303.9	ADAMTS10	2.41458	1.86696
ENSG00000138316.6	ADAMTS14	1.59169	1.48197
ENSG00000134917.9	ADAMTS8	0.0432217	0.0136108
ENSG00000197859.5	ADAMTSL2	0.45585	0.234316
ENSG00000129467.9	ADCY4	0.286878	0.927499
ENSG00000163485.11	ADORA1	3.84586	4.06176
ENSG00000169129.10	AFAP1L2	0.262268	0.353489
ENSG00000144218.14	AFF3	0.0730472	0.113724
ENSG00000160224.12	AIRE	0.357395	0.432601
ENSG00000196979.1	GPRACR	0.0539256	0.0131314
ENSG00000128918.10	ALDH1A2	0.363467	2.39552
ENSG00000159423.12	ALDH4A1	2.91881	2.71031
ENSG00000112294.8	ALDH5A1	0.433689	0.55739
ENSG00000033011.7	ALG1	3.47197	3.44222
ENSG00000012779.6	ALOX5	0.0173731	0.00142454
ENSG00000106927.7	AMBP	0.0429495	0.0694862
ENSG00000104899.4	AMH	1.47756	0.497445
ENSG00000166126.6	AMN	0.0774625	0.120225
ENSG00000126016.9	AMOT	0.464527	0.516448
ENSG00000136859.5	ANGPTL2	4.15372	4.09107
ENSG00000029534.15	ANK1	4.35581	4.06371
ENSG00000154065.12	ANKRD29	1.19764	2.73663
ENSG00000183831.6	ANKRD45	0.301891	0.188283
ENSG00000124227.4	ANKRD60	0.00336559	0.00289724
ENSG00000104537.12	ANXA13	0.0509761	0.0339531
ENSG00000265590.5	AP000275.65	4.44801	4.82002
ENSG00000268602.1	AP002353.1	0.0178545	0.00268053
ENSG00000267981.1	AP003041.2	0.0250373	0.03904
ENSG00000107282.5	APBA1	0.764778	0.775158
ENSG00000171388.9	APLN	2.06532	2.27352
ENSG00000124701.5	APOBEC2	2.91964	2.52001
ENSG00000128394.12	APOBEC3F	1.77392	2.23581
ENSG00000240583.6	AQP1	2.5305	1.81228
ENSG00000165272.10	AQP3	3.88941	3.78813
ENSG00000086159.8	AQP6	0.028428	0.0055558
ENSG00000089820.11	ARHGAP4	3.34706	3.0295
ENSG00000240771.2	ARHGEF25	2.64185	2.55048
ENSG00000163947.7	ARHGEF3	2.65516	2.25526
ENSG00000214694.6	ARHGEF33	0.471353	0.655251
ENSG00000165309.9	ARMC3	0.00662882	0.0255897
ENSG00000198960.6	ARMCX6	3.99298	4.08065
ENSG00000137486.12	ARRB1	2.12973	1.7559
ENSG00000156219.12	ART3	0.23105	0.417573
ENSG00000005981.8	ASB4	0.0369116	0.0787514
ENSG00000176009.2	ASCL3	0.0389446	0.0491849
ENSG00000141505.7	ASGR1	0.305927	0.253509
ENSG00000018625.10	ATP1A2	4.40484	4.46317
ENSG00000105409.11	ATP1A3	0.147737	0.0855651
ENSG00000157087.12	ATP2B2	0.0283672	0.0228466
ENSG00000186009.4	ATP4B	0.0320031	0.00365465
ENSG00000139044.6	B4GALNT3	0.178096	0.188306
ENSG00000164929.12	BAALC	0.977564	0.877509
ENSG00000187244.6	BCAM	6.48636	6.14763
ENSG00000183337.12	BCOR	2.85513	2.54659
ENSG00000170819.4	BFSP2	0.00646098	0.0324672
ENSG00000259040.3	BLOC1S5-TXNDC5	0.759028	1.3456
ENSG00000104765.10	BNIP3L	6.64149	6.62645
ENSG00000109743.6	BST1	2.7738	2.57725
ENSG00000138152.7	BTBD16	0.0523109	0.0537496
ENSG00000137707.9	BTG4	0.0355451	0.0153959
ENSG00000148655.10	LRMDA	1.23356	1.41582
ENSG00000165863.12	C10orf82	0.00354335	0.0285766
ENSG00000154493.13	C10orf90	0.568092	0.905879
ENSG00000185522.4	LMNTD2	0.0864566	0.20148
ENSG00000174370.5	C11orf45	0.306445	0.285371
ENSG00000187479.4	C11orf96	0.954893	0.702006
ENSG00000156411.5	ATP5MPL	7.53194	7.44877
ENSG00000169758.8	TMEM266	0.214391	0.107309
ENSG00000166920.6	C15orf48	0.257679	0.310504
ENSG00000172653.7	C17orf66	0.0011453	0.00590528
ENSG00000214212.4	C19orf38	0.265897	0.175378
ENSG00000186897.3	C1QL4	0.413541	0.505993
ENSG00000145861.7	C1QTNF2	0.749793	0.663066
ENSG00000182795.12	C1orf116	0.0456513	0.0241101
ENSG00000175262.10	C1orf127	0.00996692	0.00838041
ENSG00000203864.1	C1orf137	0.00276997	0.000675375
ENSG00000164008.9	C1orf50	3.30778	3.26441
ENSG00000176659.5	C20orf197	0.0491166	0.0320756
ENSG00000186825.3	C2orf27B	0.0368464	0.0272455
ENSG00000179270.6	PCARE	0.0208855	0.0163404
ENSG00000159239.7	C2orf81	0.874263	0.856654
ENSG00000244731.3	C4A	0.496708	0.179809
ENSG00000224389.4	C4B	0.217512	0.040095
ENSG00000187658.6	C5orf52	0.0228088	0.0134321
ENSG00000136275.6	C7orf69	0.377441	0.312942
ENSG00000236939.2	BAALC-AS2	0.0790636	0.0171946
ENSG00000232434.1	AJM1	0.636967	0.488767
ENSG00000118298.6	CA14	0.140624	0.310056
ENSG00000175544.9	CABP4	2.08247	1.98365
ENSG00000160325.10	CACFD1	2.03973	1.97986
ENSG00000151067.16	CACNA1C	0.089343	0.67906
ENSG00000183049.8	CAMK1D	0.858235	0.859814
ENSG00000058404.15	CAMK2B	0.371656	1.00893
ENSG00000171735.14	CAMTA1	6.10884	6.27858
ENSG00000144712.7	CAND2	1.52593	1.53812
ENSG00000142330.15	CAPN10	2.95854	2.99883
ENSG00000135773.8	CAPN9	0.177726	0.18925
ENSG00000130940.10	CASZ1	1.58801	1.83447
ENSG00000175294.5	CATSPER1	1.78778	1.84756
ENSG00000129993.10	CBFA2T3	0.435252	0.581324
ENSG00000163081.2	CCDC140	0.332598	0.18996
ENSG00000183401.7	CCDC159	2.24517	1.95173
ENSG00000141519.10	CCDC40	2.76675	2.1009
ENSG00000162004.12	CCDC78	1.18331	1.12396
ENSG00000118971.3	CCND2	3.2178	2.55064
ENSG00000135083.10	CCNJL	1.39082	0.701541
ENSG00000126353.3	CCR7	0.961248	2.16675
ENSG00000091972.14	CD200	2.03136	1.96594
ENSG00000104894.7	CD37	0.323096	0.560283
ENSG00000179242.11	CDH4	2.05506	1.48501
ENSG00000117266.11	CDK18	4.89841	5.00297
ENSG00000204539.3	CDSN	0.23632	0.090151
ENSG00000092067.5	CEBPE	0.00694722	0.0133952
ENSG00000093072.11	ADA2	2.37937	1.78786
ENSG00000170835.10	CEL	0.209214	0.148028
ENSG00000101489.14	CELF4	0.16387	0.221892
ENSG00000140488.10	CELF6	0.229888	0.13024
ENSG00000273025.1	CELF6	0.0217302	0.00134789
ENSG00000008300.10	CELSR3	0.363431	0.33995
ENSG00000136457.5	CHAD	0.514227	0.473049
ENSG00000133048.8	CHI3L1	2.63047	2.83495
ENSG00000254413.4	CHKB-CPT1B	0.854559	0.764188
ENSG00000106069.16	CHN2	0.264646	0.713647
[truncated: 527 more rows]

## Sheet: Activated genes expression MT
Expression levels of activated genes in MT
[truncated: 2,318 more rows]

[truncated: 1 more sheets: Transcr. Repressed genes MT]
