# Supplementary material for: 4q-D4Z4 chromatin architecture regulates the transcription of muscle atrophic genes in facioscapulohumeral muscular dystrophy
Source: HighWire-hosted journal article supplement (doi:10.1101/gr.233288.117), 2019-05-16
Supplement: Supplemental_Table_S5_JD.xlsx [file Supplemental_Table_S5_JD.xlsx]

## Sheet: legend
Supplemental Table S5. Gene Ontology, GSEA and atrophic genes expression levels
Sheet 1	Genes within 4q and 10q-D4Z4 lost interactions in FSHD1
Sheet 2	Summary of the FSHD1 altered genes
Sheet 3	GO analysis for lost activated/repressed 4q-D4Z4 genes in FSHD1
Sheet 4	GO analysis for lost activated/repressed 10q-D4Z4 genes in FSHD1
Sheet 5	GSEA datasets
Sheet 6	Expression levels of atrophic genes in CN vs FSHD1 and FSHD2

## Sheet: Lost FSHD1 Genes
Genes within 4q-D4Z4 lost interactions in FSHD1								Genes within 10q-D4Z4 lost interactions in FSHD1
Chr	Start	End	Strand	Ensembl	Gene Symbol	Annotations		Chr	Start	End	Strand	Ensembl	Gene Symbol	Annotations
chr1	10003486	10045559	+	ENSG00000173614.9	NMNAT1	-		chr1	15764935	15775737	+	ENSG00000162438.7	CTRC	-
chr1	10057264	10076078	+	ENSG00000162444.11	RBP7	-		chr1	15783223	15798586	+	ENSG00000142615.7	CELA2A	Repressed
chr1	10092890	10241297	+	ENSG00000130939.14	UBE4B	Activated		chr1	15792404	15817895	+	ENSG00000215704.5	CELA2B	Repressed
chr1	16010827	16061264	+	ENSG00000116786.7	PLEKHM2	-		chr1	15817327	15853029	-	ENSG00000132906.13	CASP9	Activated
chr1	16062900	16067891	+	ENSG00000162461.7	SLC25A34	-		chr1	15853308	15918874	+	ENSG00000116138.8	DNAJC16	-
chr1	16068917	16074477	+	ENSG00000162460.6	TMEM82	-		chr1	15898848	15911605	-	ENSG00000116771.5	AGMAT	Activated
chr1	16083102	16113089	+	ENSG00000162458.8	FBLIM1	Activated		chr1	15943995	15995539	+	ENSG00000197312.7	DDI2	Activated
chr1	16174359	16266955	+	ENSG00000065526.6	SPEN	Activated		chr1	15986364	15988217	+	ENSG00000215695.1	RSC1A1	-
chr1	16268364	16302627	-	ENSG00000116809.7	ZBTB17	Activated		chr1	16010827	16061264	+	ENSG00000116786.7	PLEKHM2	-
chr1	16330731	16335302	+	ENSG00000183888.4	SRARP	-		chr1	16062900	16067891	+	ENSG00000162461.7	SLC25A34	-
chr1	16340523	16346089	-	ENSG00000173641.13	HSPB7	-		chr1	16068917	16074477	+	ENSG00000162460.6	TMEM82	-
chr1	16345370	16360545	+	ENSG00000186510.7	CLCNKA	Repressed		chr1	16083102	16113089	+	ENSG00000162458.8	FBLIM1	Activated
chr1	16370272	16383803	+	ENSG00000184908.13	CLCNKB	-		chr1	16174359	16266955	+	ENSG00000065526.6	SPEN	Activated
chr1	16384264	16400127	-	ENSG00000185519.8	FAM131C	-		chr1	16268364	16302627	-	ENSG00000116809.7	ZBTB17	Activated
chr1	16450832	16482582	-	ENSG00000142627.9	EPHA2	Activated		chr1	16330731	16335302	+	ENSG00000183888.4	SRARP	-
chr1	16524349	16539104	-	ENSG00000142632.12	ARHGEF19	-		chr1	16340523	16346089	-	ENSG00000173641.13	HSPB7	-
chr1	16555368	16556038	-	ENSG00000204377.3	C1orf134	-		chr1	16345370	16360545	+	ENSG00000186510.7	CLCNKA	Repressed
chr1	16558195	16563657	-	ENSG00000132881.7	CPLANE2	-		chr1	16370272	16383803	+	ENSG00000184908.13	CLCNKB	-
chr1	16573334	16678949	-	ENSG00000037637.6	FBXO42	Activated		chr1	16384264	16400127	-	ENSG00000185519.8	FAM131C	-
chr1	16679070	16724640	+	ENSG00000055070.12	SZRD1	-		chr1	24018269	24022915	+	ENSG00000142676.8	RPL11	-
chr1	16713612	16763919	-	ENSG00000187144.7	SPATA21	-		chr1	24069645	24088549	+	ENSG00000011007.8	ELOA	Activated
chr1	16767167	16786573	+	ENSG00000157191.15	NECAP2	Activated		chr1	24104895	24114722	+	ENSG00000057757.5	PITHD1	-
chr1	16865561	16866070	+	ENSG00000268674.1	AL355149.2	-		chr1	24117460	24122029	+	ENSG00000011009.6	LYPLA2	Activated
chr1	16888814	16940057	-	ENSG00000219481.6	NBPF1	-		chr1	24122089	24127271	-	ENSG00000117308.10	GALE	-
chr1	16999498	17000007	+	ENSG00000237847.2	AL137798.1	-		chr1	24128375	24165110	-	ENSG00000117305.10	HMGCL	Activated
chr1	17060447	17060956	-	ENSG00000268991.1	AL021920.2	-		chr1	24171567	24194784	-	ENSG00000179163.11	FUCA1	Repressed
chr1	17066768	17299474	+	ENSG00000058453.12	CROCC	Repressed		chr1	24197016	24285549	-	ENSG00000188822.6	CNR2	Repressed
chr1	17300997	17307330	-	ENSG00000117122.9	MFAP2	-		chr1	24285599	24289952	+	ENSG00000189266.7	PNRC2	-
chr1	17312453	17338423	-	ENSG00000159363.13	ATP13A2	-		chr1	24291294	24307417	-	ENSG00000188529.10	SRSF10	-
chr1	17345217	17380665	-	ENSG00000117118.5	SDHB	-		chr1	24382525	24438665	-	ENSG00000142661.14	MYOM3	Repressed
chr1	17393256	17445948	-	ENSG00000117115.8	PADI2	-		chr1	24446261	24469611	-	ENSG00000142677.3	IL22RA1	Repressed
chr1	17531621	17572500	+	ENSG00000142623.8	PADI1	Repressed		chr1	24480647	24514449	-	ENSG00000185436.7	IFNLR1	-
chr1	39546988	39952849	+	ENSG00000127603.19	MACF1	Activated		chr1	24645812	24690972	+	ENSG00000158055.11	GRHL3	-
chr1	39876151	39882154	+	ENSG00000255103.1	KIAA0754	-		chr1	24683489	24743424	-	ENSG00000001460.13	STPG1	-
chr1	39957318	39991607	+	ENSG00000183682.7	BMP8A	Repressed		chr1	24742284	24799466	+	ENSG00000001461.12	NIPAL3	Activated
chr1	40026488	40042462	-	ENSG00000090621.9	PABPC4	-		chr1	24829387	24867530	+	ENSG00000117602.7	RCAN3	-
chr1	89149905	89301938	+	ENSG00000065243.14	PKN2	-		chr1	24882602	24935819	+	ENSG00000184454.6	NCMAP	-
chr1	89318615	89357627	-	ENSG00000137947.7	GTF2B	-		chr1	24958207	24999758	+	ENSG00000133226.12	SRRM1	-
chr1	89401456	89458636	-	ENSG00000137944.12	KYAT3	-		chr1	25071848	25170815	+	ENSG00000169504.10	CLIC4	Activated
chr1	89445139	89458643	-	ENSG00000213516.5	RBMXL1	-		chr1	25226002	25291612	-	ENSG00000020633.14	RUNX3	-
chr1	89472349	89488577	-	ENSG00000117226.7	GBP3	-		chr1	25549170	25558993	-	ENSG00000117614.5	SYF2	Activated
chr1	89518002	89531043	-	ENSG00000117228.9	GBP1	-		chr1	25568728	25664704	-	ENSG00000117616.13	RSRP1	Activated
chr1	89571815	89616139	-	ENSG00000162645.8	GBP2	-		chr1	25598884	25656936	+	ENSG00000187010.14	RHD	-
chr1	89597434	89641723	-	ENSG00000213512.1	GBP7	-		chr1	25664408	25688852	+	ENSG00000183726.6	TMEM50A	-
chr1	89646831	89664615	-	ENSG00000162654.8	GBP4	-		chr1	25688740	25756683	-	ENSG00000188672.12	RHCE	Repressed
chr1	89724633	89738544	-	ENSG00000154451.10	GBP5	-		chr1	25757388	25826700	+	ENSG00000204178.5	MACO1	Activated
chr1	89829617	89852020	+	ENSG00000183347.13	GBP6	-		chr1	25870071	25895377	+	ENSG00000157978.7	LDLRAP1	-
chr1	89990395	90063423	+	ENSG00000197147.8	LRRC8B	Activated		chr1	25943959	26112698	+	ENSG00000117643.10	MAN1C1	Repressed
chr1	90098631	90235462	+	ENSG00000171488.10	LRRC8C	-		chr1	26126667	26144713	+	ENSG00000162430.12	SELENON	Activated
chr1	90098699	90398809	+	ENSG00000271949.1	RP11-302M6.4	-		chr1	26137961	26150235	+	ENSG00000255054.3	RP1-317E23.6	-
chr1	90286573	90402170	+	ENSG00000171492.10	LRRC8D	-		chr1	26145131	26159432	+	ENSG00000117640.13	MTFR1L	-
chr1	171283347	171311223	+	ENSG00000076258.5	FMO4	-		chr1	26145212	26147288	-	ENSG00000223474.2	AL020996.1	-
chr1	171454651	171562650	+	ENSG00000117523.11	PRRC2C	-		chr1	26158414	26185903	-	ENSG00000127423.6	AUNIP	-
chr1	171604557	171621823	-	ENSG00000034971.10	MYOC	-		chr1	26187701	26197744	-	ENSG00000182749.5	PAQR7	-
chr1	171669300	171711387	-	ENSG00000117533.10	VAMP4	-		chr1	46252659	46501796	+	ENSG00000086015.16	MAST2	-
chr1	171750788	171783163	+	ENSG00000010165.15	EEF1AKNMT	Activated		chr1	46505812	46642160	-	ENSG00000117461.10	PIK3R3	Activated
chr1	171810621	172387606	+	ENSG00000197959.9	DNM3	-		chr1	46640745	46651630	+	ENSG00000117472.5	TSPAN1	-
chr1	217600334	217804424	-	ENSG00000092978.6	GPATCH2	-		chr1	46654354	46685977	-	ENSG00000085998.9	POMGNT1	-
chr1	217804666	218045038	+	ENSG00000162814.6	SPATA17	-		chr1	46669006	46686933	+	ENSG00000171357.5	LURAP1	-
chr1	218458629	218511325	+	ENSG00000067533.5	RRP15	-		chr1	46713360	46744145	+	ENSG00000085999.7	RAD54L	-
chr1	218519577	218617961	+	ENSG00000092969.7	TGFB2	-		chr1	46726868	46769280	-	ENSG00000132128.12	LRRC41	Activated
chr1	218683438	218699320	+	ENSG00000228208.2	C1orf143	-		chr1	46769303	46782448	+	ENSG00000173660.7	UQCRH	Activated
chr1	219347186	219386207	+	ENSG00000143353.7	LYPLAL1	-		chr1	46805849	46830824	+	ENSG00000117481.6	NSUN4	-
chr1	219858769	220131989	-	ENSG00000196660.6	SLC30A10	-		chr1	46859937	46879520	+	ENSG00000117480.11	FAAH	-
chr1	220141943	220220000	-	ENSG00000136628.13	EPRS	-		chr1	46972668	46979898	+	ENSG00000197587.6	DMBX1	-
chr1	220230824	220263804	-	ENSG00000162813.13	BPNT1	-		chr1	47011316	47017199	-	ENSG00000162456.5	KNCN	-
chr1	220267444	220321380	+	ENSG00000067704.8	IARS2	-		chr1	47023090	47082515	-	ENSG00000079277.15	MKNK1	Activated
chr1	220321635	220445796	-	ENSG00000118873.11	RAB3GAP2	-		chr1	47073387	47082563	-	ENSG00000142961.10	MOB3C	-
chr1	220603286	220608023	-	ENSG00000224867.2	AC096644.1	-		chr1	47098409	47139539	-	ENSG00000123472.8	ATPAF1	-
chr1	220701568	220837803	+	ENSG00000116141.11	MARK1	-		chr1	47124366	47184824	-	ENSG00000159658.6	EFCAB14	-
chr1	220863187	220872499	+	ENSG00000162817.6	C1orf115	-		chr1	47134527	47139266	+	ENSG00000186118.7	TEX38	-
chr1	220921567	220958150	+	ENSG00000117791.11	37316	-		chr1	47223510	47285085	+	ENSG00000142973.8	CYP4B1	-
chr1	220960101	220987735	+	ENSG00000186205.8	36951	Repressed		chr1	47394849	47407156	-	ENSG00000187048.8	CYP4A11	-
chr1	221051699	221058401	+	ENSG00000136630.11	HLX	-		chr1	47427036	47516423	+	ENSG00000186377.6	CYP4X1	-
chr10	7200586	7453450	-	ENSG00000198879.7	SFMBT2	-		chr1	47533160	47583991	+	ENSG00000186160.4	CYP4Z1	-
chr10	7601232	7708961	-	ENSG00000123243.10	ITIH5	Repressed		chr1	47603107	47615413	+	ENSG00000162365.7	CYP4A22	-
chr10	7745232	7791483	+	ENSG00000151655.13	ITIH2	-		chr1	47649265	47656716	-	ENSG00000162366.3	PDZK1IP1	-
chr10	7792925	7829990	-	ENSG00000151657.7	KIN	-		chr1	47681962	47697892	-	ENSG00000162367.7	TAL1	-
chr10	7830092	7849778	+	ENSG00000165629.15	ATP5F1C	Activated		chr1	47715811	47779819	-	ENSG00000123473.11	STIL	-
chr10	7860467	8058590	+	ENSG00000165632.7	TAF3	-		chr1	47799469	47844511	+	ENSG00000162368.9	CMPK1	Activated
chr10	8095567	8117161	+	ENSG00000107485.11	GATA3	Repressed		chr1	47881744	47883723	+	ENSG00000186790.4	FOXE3	-
chr10	52750945	54058110	+	ENSG00000185532.10	PRKG1	-		chr1	47901689	47906363	+	ENSG00000186564.5	FOXD2	-
chr10	53455247	53459355	-	ENSG00000177613.7	CSTF2T	-		chr1	81771845	82458120	+	ENSG00000117114.15	ADGRL2	-
chr10	75910960	76469061	+	ENSG00000156110.9	ADK	Activated		chr1	201008642	201081694	-	ENSG00000081248.6	CACNA1S	Repressed
chr10	83635070	84746935	+	ENSG00000185737.8	NRG3	-		chr1	201083081	201096312	-	ENSG00000232237.2	ASCL5	Repressed
chr10	87359312	88126250	-	ENSG00000182771.13	GRID1	-		chr1	201103900	201140702	-	ENSG00000116857.12	TMEM9	Repressed
chr10	127700950	128077024	-	ENSG00000148848.10	ADAM12	Activated		chr1	201159953	201198080	+	ENSG00000163395.12	IGFN1	-
chr11	59341871	59383617	-	ENSG00000110048.7	OSBP	Activated		chr1	201252580	201302121	+	ENSG00000081277.7	PKP1	Repressed
chr11	70313961	70963623	-	ENSG00000162105.12	SHANK2	Repressed		chr1	201328136	201346890	-	ENSG00000118194.14	TNNT2	Repressed
chr11	71139239	71163914	-	ENSG00000172893.11	DHCR7	-		chr1	201342372	201368736	-	ENSG00000159166.9	LAD1	-
chr11	71164155	71235153	+	ENSG00000172890.7	NADSYN1	-		chr1	201373625	201398994	-	ENSG00000159173.14	TNNI1	Repressed
chr11	71238313	71239210	+	ENSG00000244411.2	KRTAP5-7	-		chr1	201434620	201438365	-	ENSG00000174307.5	PHLDA3	-
chr11	71249071	71250253	+	ENSG00000241233.1	KRTAP5-8	-		chr1	201452658	201478584	-	ENSG00000159176.9	CSRP1	-
chr11	71259466	71260653	+	ENSG00000254997.2	KRTAP5-9	-		chr1	201592013	201592738	+	ENSG00000269690.1	AC096677.1	-
chr11	71276609	71279980	+	ENSG00000204572.5	KRTAP5-10	-		chr1	201592411	201796102	+	ENSG00000134369.11	NAV1	Activated
chr11	71292901	71314399	-	ENSG00000204571.4	KRTAP5-11	-		chr1	201798269	201853422	+	ENSG00000198700.5	IPO9	Activated
chr11	71292956	71318487	-	ENSG00000187811.3	AP000867.1	-		chr1	201857808	201861434	+	ENSG00000198892.6	SHISA4	-
chr11	71498556	71512282	+	ENSG00000158483.11	FAM86C1	Activated		chr1	201865580	201915715	-	ENSG00000163431.11	LMOD1	Repressed
chr11	71544246	71548756	+	ENSG00000184276.2	DEFB108B	-		chr1	201924619	201939789	+	ENSG00000134375.6	TIMM17A	-
chr11	71576555	71639700	-	ENSG00000254469.3	RP11-849H4.2	-		chr1	201951500	201975275	+	ENSG00000176393.6	RNPEP	-
chr11	71639747	71708643	+	ENSG00000137522.13	RNF121	-		chr1	201977073	201986316	+	ENSG00000163435.11	ELF3	-
chr11	71709587	71716761	+	ENSG00000137496.13	IL18BP	-		chr1	202091986	202102720	+	ENSG00000170075.8	GPR37L1	-
chr11	71713910	71791739	-	ENSG00000137497.13	NUMA1	Activated		chr1	202102532	202113869	-	ENSG00000143862.3	ARL8A	Activated
chr11	71791382	71821828	+	ENSG00000184154.8	LRTOMT	Activated		chr1	202116141	202130716	-	ENSG00000143851.11	PTPN7	Repressed
chr11	71796941	71814433	-	ENSG00000149357.5	LAMTOR1	-		chr1	214454445	214510474	+	ENSG00000143499.9	SMYD2	-
chr11	71817424	71823826	-	ENSG00000110200.4	ANAPC15	Activated		chr1	214522039	214725792	-	ENSG00000152104.7	PTPN14	Activated
chr11	71825915	71850936	+	ENSG00000110203.4	FOLR3	-		chr1	214776538	214837931	+	ENSG00000117724.8	CENPF	-
chr11	71900602	71907345	+	ENSG00000110195.7	FOLR1	-		chr1	215179118	215410436	+	ENSG00000082482.9	KCNK2	-
chr11	71927645	71932994	+	ENSG00000165457.9	FOLR2	-		chr1	215740735	215795149	+	ENSG00000136636.8	KCTD3	-
chr11	71934745	71950149	+	ENSG00000165458.9	INPPL1	-		chr1	215796236	216596738	-	ENSG00000042781.8	USH2A	-
chr11	71950121	71956708	-	ENSG00000165462.5	PHOX2A	-		chr1	221874766	221915518	-	ENSG00000143507.13	DUSP10	-
chr11	72003469	72145692	-	ENSG00000162129.8	CLPB	-		chr1	230193536	230417870	+	ENSG00000143641.8	GALNT2	Activated
chr11	72287185	72385635	-	ENSG00000186642.11	PDE2A	Repressed		chr1	230457392	230561475	-	ENSG00000177614.5	PGBD5	Activated
chr11	72396114	72504644	-	ENSG00000186635.10	ARAP1	Activated		chr1	230778235	230829728	+	ENSG00000135775.9	COG2	-
chr11	72465774	72504726	-	ENSG00000214530.3	STARD10	-		chr1	230838269	230850043	-	ENSG00000135744.7	AGT	Repressed
chr11	72525353	72554719	+	ENSG00000168010.6	ATG16L2	Activated		chr1	230883130	230937749	+	ENSG00000135773.8	CAPN9	Repressed
chr11	72547790	72853306	-	ENSG00000137478.10	FCHSD2	Activated		chr1	230972865	231005335	-	ENSG00000119280.12	C1orf198	Activated
chr11	115039938	115375675	-	ENSG00000182985.12	CADM1	-		chr1	231041989	231114621	-	ENSG00000143643.8	TTC13	-
chr12	69864129	69973562	+	ENSG00000166225.4	FRS2	Activated		chr1	231114727	231136341	+	ENSG00000173409.9	ARV1	-
chr12	69979114	69995350	+	ENSG00000166226.8	CCT2	-		chr1	231154704	231175992	-	ENSG00000182118.5	FAM89A	-
chr12	70002351	70004942	-	ENSG00000198812.3	LRRC10	-		chr1	231297858	231357302	+	ENSG00000119283.11	TRIM67	-
chr12	70037140	70093256	-	ENSG00000127325.14	BEST3	-		chr1	231359509	231376933	-	ENSG00000143633.8	C1orf131	-
chr12	70132461	70216984	+	ENSG00000127328.17	RAB3IP	-		chr1	231376953	231413719	+	ENSG00000116906.7	GNPAT	-
chr12	70195449	70249143	+	ENSG00000258052.1	AC025263.3	-		chr10	12391481	12877545	+	ENSG00000183049.8	CAMK1D	Repressed
chr12	70219084	70352877	+	ENSG00000166268.6	MYRFL	-		chr10	34398488	35104253	-	ENSG00000148498.11	PARD3	Activated
chr12	70636774	70748773	+	ENSG00000111596.7	CNOT2	-		chr10	45798102	45811056	-	ENSG00000256574.2	OR13A1	-
chr12	70760056	70828072	+	ENSG00000135643.4	KCNMB4	-		chr10	45869661	45941561	+	ENSG00000012779.6	ALOX5	Repressed
chr12	70910630	71031220	-	ENSG00000127329.10	PTPRB	-		chr10	45950035	46090354	-	ENSG00000165406.11	2008-03-01	-
chr12	71031853	71314623	-	ENSG00000153233.8	PTPRR	-		chr10	52750945	54058110	+	ENSG00000185532.10	PRKG1	-
chr12	71441182	71512027	-	ENSG00000258053.1	CTD-2021H9.3	-		chr10	54074056	54077802	+	ENSG00000107984.5	DKK1	-
chr12	71518865	71835678	-	ENSG00000127324.4	TSPAN8	-		chr10	60936350	61007534	+	ENSG00000165443.7	PHYHIPL	-
chr12	71833550	71980090	+	ENSG00000139292.8	LGR5	Repressed		chr10	62629196	62761198	-	ENSG00000072422.12	RHOBTB1	-
chr12	72003252	72061505	-	ENSG00000133858.11	ZFC3H1	Activated		chr10	65281123	65384883	+	ENSG00000165476.8	REEP3	Activated
chr12	72056789	72074419	+	ENSG00000173451.2	THAP2	-		chr10	67672276	69455927	-	ENSG00000183230.12	CTNNA3	-
chr12	72067984	72092748	+	ENSG00000258064.1	RP11-293I14.2	-		chr10	69556427	69597924	-	ENSG00000108176.10	DNAJC12	-
chr12	72079867	72097836	+	ENSG00000139291.9	TMEM19	-		chr10	69644427	69678147	+	ENSG00000096717.7	SIRT1	-
chr12	72148654	72184699	+	ENSG00000080371.4	RAB21	Activated		chr10	69681665	69835105	-	ENSG00000148634.11	HERC4	Activated
chr12	92378756	92536690	-	ENSG00000257242.2	LINC01619	-		chr10	69865912	69971774	+	ENSG00000138347.11	MYPN	Activated
chr12	92536286	92539673	-	ENSG00000133639.3	BTG1	-		chr10	69990386	69991871	-	ENSG00000179774.7	ATOH7	-
chr12	92813870	92821924	-	ENSG00000205057.3	CLLU1OS	-		chr10	70042417	70092806	-	ENSG00000108187.11	PBLD	Activated
chr12	92815307	92824778	+	ENSG00000257127.2	CLLU1	-		chr10	70090931	70102948	+	ENSG00000096746.13	HNRNPH3	Activated
chr12	93096619	93102325	+	ENSG00000214215.3	C12orf74	-		chr10	70100864	70167051	-	ENSG00000204130.8	RUFY2	-
chr12	93115281	93166231	+	ENSG00000187510.3	PLEKHG7	-		chr10	70173821	70231879	-	ENSG00000138346.10	DNA2	-
chr12	93164413	93323107	-	ENSG00000102189.12	EEA1	Activated		chr10	70237756	70287231	-	ENSG00000122912.10	SLC25A16	-
chr12	93771659	93797024	+	ENSG00000173598.9	NUDT4	Activated		chr10	89117425	89130452	+	ENSG00000214562.9	NUTM2D	Repressed
chr12	93799449	93836038	-	ENSG00000177889.5	UBE2N	-		chr10	89264632	89313217	+	ENSG00000107789.11	MINPP1	Activated
chr12	93861264	93897545	+	ENSG00000198015.8	MRPL42	-		chr10	89419370	89507462	+	ENSG00000198682.8	PAPSS2	-
chr12	101111304	101522419	+	ENSG00000151572.12	ANO4	-		chr10	89511269	89601100	-	ENSG00000138138.9	ATAD1	Activated
chr12	101549271	101604185	-	ENSG00000256870.2	SLC5A8	-		chr10	93388199	93392811	-	ENSG00000119938.8	PPP1R3C	-
chr12	101673887	101780394	+	ENSG00000120800.4	UTP20	-		chr10	93558069	93625033	+	ENSG00000107854.5	TNKS2	-
chr12	101786898	101801598	-	ENSG00000120805.9	ARL1	-		chr10	93666346	93669240	-	ENSG00000174721.9	FGFBP3	-
chr12	101869199	101880775	+	ENSG00000166211.6	SPIC	-		chr10	93683526	93790082	+	ENSG00000095564.9	BTAF1	-
chr12	101962131	102079796	+	ENSG00000196091.8	MYBPC1	-		chr10	93806449	94050844	-	ENSG00000107864.10	CPEB3	Activated
chr12	102090725	102137918	+	ENSG00000111666.6	CHPT1	-		chr10	94050920	94113721	+	ENSG00000198060.5	2005-03-01	-
chr12	102122426	102133250	-	ENSG00000139351.10	SYCP3	-		chr10	94590935	94819250	+	ENSG00000138190.12	EXOC6	-
chr12	102139275	102224716	-	ENSG00000111670.10	GNPTAB	-		chr10	94821021	94828454	+	ENSG00000187553.5	CYP26C1	-
chr12	107712190	108053419	+	ENSG00000151136.10	BTBD11	Repressed		chr10	94833232	94837647	+	ENSG00000095596.7	CYP26A1	-
chr12	108079509	108106944	+	ENSG00000136045.7	PWP1	-		chr10	95066186	95242074	-	ENSG00000138119.12	MYOF	Activated
chr12	108126643	108155049	-	ENSG00000110851.7	PRDM4	Activated		chr10	95653730	95715819	+	ENSG00000176273.10	SLC35G1	-
chr12	108168162	108170421	+	ENSG00000187855.5	ASCL4	-		chr10	95753746	96092580	+	ENSG00000138193.10	PLCE1	Activated
chr13	25670300	25673389	+	ENSG00000151846.7	PABPC3	-		chr10	96075004	96122716	-	ENSG00000173145.7	NOC3L	Activated
chr13	25735822	25746426	-	ENSG00000165566.11	AMER2	-		chr10	99079022	99081672	+	ENSG00000165879.7	FRAT1	-
chr13	25802307	25862147	-	ENSG00000139505.10	MTMR6	-		chr10	99092255	99094458	-	ENSG00000181274.5	FRAT2	-
chr13	25875662	25923938	+	ENSG00000139496.11	NUP58	-		chr10	99116115	99161127	-	ENSG00000052749.9	RRP12	-
chr13	25946209	26599989	+	ENSG00000132932.12	ATP8A2	-		chr10	101635334	101769676	-	ENSG00000107554.11	DNMBP	Activated
chr13	26442061	26455095	+	ENSG00000215549.1	AL138815.1	-		chr10	101801950	101841634	-	ENSG00000120054.7	CPN1	-
chr13	26452422	26452679	-	ENSG00000268344.1	AL138815.2	-		chr10	103370423	103455052	-	ENSG00000107829.9	FBXW4	-
chr13	26618735	26625169	-	ENSG00000180730.4	SHISA2	-		chr10	103529899	103535854	-	ENSG00000107831.8	FGF8	-
chr13	26706253	26796791	-	ENSG00000127870.12	RNF6	-		chr10	103541082	103543170	-	ENSG00000107833.6	NPM3	-
chr13	26828276	26979375	+	ENSG00000132964.7	CDK8	-		chr10	103544200	103578696	-	ENSG00000198408.9	OGA	Activated
chr13	27131840	27263085	+	ENSG00000132970.8	WASF3	-		chr10	103585731	103603677	-	ENSG00000120049.14	KCNIP2	-
chr13	35516424	36247159	+	ENSG00000172915.14	NBEA	-		chr10	103605356	103815950	-	ENSG00000120029.8	ARMH3	Activated
chr13	36345478	36705443	-	ENSG00000133083.10	DCLK1	Activated		chr10	104153867	104162281	+	ENSG00000077150.13	NFKB2	Activated
chr13	36742345	36871979	-	ENSG00000120669.11	SOHLH2	-		chr10	104162376	104181296	-	ENSG00000059915.12	PSD	-
chr13	36742931	36871979	-	ENSG00000250709.1	CCDC169-SOHLH2	-		chr10	104178946	104182893	+	ENSG00000107872.8	FBXL15	-
chr13	36801182	36871977	-	ENSG00000242715.3	CCDC169	-		chr10	104183002	104192418	-	ENSG00000107874.6	CUEDC2	-
chr13	36875775	36944317	-	ENSG00000133104.8	SPART	Activated		chr10	104209594	104211300	-	ENSG00000120055.5	C10orf95	-
chr13	36920568	36943738	+	ENSG00000120664.6	SPART-AS1	-		chr10	104221149	104236802	+	ENSG00000138111.10	MFSD13A	-
chr13	37005967	37017019	+	ENSG00000133101.5	CCNA1	-		chr10	104238986	104262482	-	ENSG00000138107.7	ACTR1A	-
chr13	113862552	113919399	+	ENSG00000139842.10	CUL4A	-		chr10	104263744	104393292	+	ENSG00000107882.7	SUFU	Activated
chr13	113951556	113977987	+	ENSG00000185896.9	LAMP1	-		chr10	104404253	104418164	+	ENSG00000171206.9	TRIM8	-
chr13	113978505	114018446	-	ENSG00000139835.9	GRTP1	-		chr10	104433488	104474164	-	ENSG00000138175.8	ARL3	Activated
chr13	114076260	114107839	-	ENSG00000153531.8	ADPRHL1	Activated		chr10	104474295	104503249	+	ENSG00000156398.8	SFXN2	-
chr13	114110134	114145267	-	ENSG00000150401.10	DCUN1D2	-		chr10	104503727	104576021	+	ENSG00000166272.12	WBP1L	-
chr13	114145310	114204542	+	ENSG00000150403.13	TMCO3	-		chr10	118609023	118671299	+	ENSG00000188316.9	ENO4	Repressed
chr13	114239013	114295785	+	ENSG00000198176.8	TFDP1	-		chr10	118643742	118886097	-	ENSG00000187164.13	SHTN1	-
chr13	114303119	114312501	-	ENSG00000186009.4	ATP4B	Repressed		chr10	118957000	118969810	+	ENSG00000186795.1	KCNK18	-
chr13	114321470	114440708	+	ENSG00000185974.6	GRK1	-		chr10	119000604	119038941	+	ENSG00000165646.7	SLC18A2	-
chr14	19377522	19378606	+	ENSG00000257115.1	OR11H12	-		chr10	119040000	119134978	-	ENSG00000165650.7	PDZD8	-
chr14	19553365	19590078	+	ENSG00000222036.3	POTEM	-		chr10	119764427	119806114	-	ENSG00000107560.6	RAB11FIP2	Activated
chr14	19983559	20020272	-	ENSG00000187537.9	POTEG	-		chr10	122610687	122669036	+	ENSG00000120008.11	WDR11	-
chr14	20187174	20296531	+	ENSG00000176294.3	OR4N2	-		chr10	128593978	129250781	+	ENSG00000150760.8	DOCK1	Activated
chr14	20215587	20216528	+	ENSG00000182652.1	OR4Q3	-		chr10	131265448	131566271	+	ENSG00000170430.9	MGMT	-
chr14	20248401	20249516	+	ENSG00000176299.4	OR4M1	-		chr10	131633547	131762105	-	ENSG00000108001.9	EBF3	Activated
chr14	20344391	20345468	+	ENSG00000165762.2	OR4K2	-		chr10	133604734	133622535	-	ENSG00000189275.3	LINC01164	-
chr14	20388741	20389818	+	ENSG00000176281.4	OR4K5	-		chr10	133747955	133773331	+	ENSG00000175470.14	PPP2R2D	-
chr14	20403767	20404842	+	ENSG00000155249.4	OR4K1	-		chr10	133781578	133795435	-	ENSG00000176171.7	BNIP3	-
chr14	20443603	20444818	+	ENSG00000169488.5	OR4K15	-		chr10	134351324	134596979	+	ENSG00000068383.14	INPP5A	Activated
chr14	20482419	20483352	-	ENSG00000169484.2	OR4K14	-		chr10	135234170	135382916	-	ENSG00000203772.6	SPRN	-
chr14	20502003	20502919	-	ENSG00000176253.2	OR4K13	-		chr10	135333910	135374724	+	ENSG00000130649.5	CYP2E1	-
chr14	20528204	20529142	+	ENSG00000176246.1	OR4L1	-		chr10	135367404	135382876	-	ENSG00000171772.11	SYCE1	-
chr14	20585566	20586597	+	ENSG00000176230.4	OR4K17	-		chr12	74931551	74935223	+	ENSG00000253719.2	ATXN7L3B	-
chr14	20611895	20612821	+	ENSG00000184394.1	OR4N5	-		chr12	86372516	87232681	-	ENSG00000182050.9	MGAT4C	-
chr14	20665495	20666605	+	ENSG00000196832.3	OR11G2	-		chr12	88373816	88427814	-	ENSG00000165805.5	C12orf50	-
chr14	20691791	20692964	+	ENSG00000176219.2	OR11H6	-		chr12	88427623	88443937	+	ENSG00000133641.13	C12orf29	-
chr14	20710898	20711979	+	ENSG00000176198.2	OR11H4	-		chr12	88442793	88535993	-	ENSG00000198707.10	CEP290	-
chr14	20724717	20774153	-	ENSG00000136319.7	TTC5	-		chr12	88536073	88593664	+	ENSG00000139324.7	TMTC3	-
chr14	20779527	20801471	-	ENSG00000100814.13	CCNB1IP1	Activated		chr12	88886570	88974628	-	ENSG00000049130.9	KITLG	Activated
chr14	20811741	20826064	+	ENSG00000129484.9	PARP2	-		chr12	103981051	104160505	+	ENSG00000136011.10	STAB2	Repressed
chr14	20833826	20881588	-	ENSG00000129566.8	TEP1	Activated		chr12	104164231	104234975	-	ENSG00000111696.7	NT5DC3	Activated
chr14	20896970	20903801	-	ENSG00000185271.6	KLHL33	-		chr12	104235229	104238442	+	ENSG00000257327.1	RP11-650K20.3	-
chr14	20914570	20923264	-	ENSG00000092094.6	OSGEP	-		chr12	104323885	104347423	+	ENSG00000166598.8	HSP90B1	-
chr14	20923350	20925927	+	ENSG00000100823.7	APEX1	-		chr12	104343980	104359486	-	ENSG00000204954.5	C12orf73	-
chr14	20925878	20929771	-	ENSG00000165782.6	PIP4P1	-		chr12	104359582	104382652	+	ENSG00000139372.10	TDG	Activated
chr14	20937113	20945253	+	ENSG00000198805.7	PNP	-		chr12	104382762	104457961	-	ENSG00000120820.8	GLT8D2	-
chr14	20973696	20979328	+	ENSG00000182545.6	RNASE10	-		chr12	104458235	104498639	+	ENSG00000111727.7	HCFC2	-
chr14	21024252	21029090	-	ENSG00000188655.6	RNASE9	-		chr12	123237321	123255611	+	ENSG00000139726.6	DENR	-
chr14	21051051	21077954	-	ENSG00000259060.2	RNASE11	-		chr12	123258874	123312075	+	ENSG00000130783.9	CCDC62	-
chr14	21051054	21078043	-	ENSG00000173464.10	RNASE11	-		chr12	123319000	123347507	+	ENSG00000130787.9	HIP1R	Activated
chr14	21058352	21058982	-	ENSG00000258436.1	RNASE12	-		chr12	123349882	123380991	-	ENSG00000139722.2	VPS37B	-
chr14	21108855	21109850	-	ENSG00000181803.3	OR6S1	-		chr12	123405498	123466196	-	ENSG00000150967.13	ABCB9	Activated
chr14	21152259	21168761	+	ENSG00000258818.2	RNASE4	-		chr12	123459127	123464590	+	ENSG00000111325.12	OGFOD2	-
chr14	21152336	21167130	+	ENSG00000214274.5	ANG	-		chr12	123464607	123467456	+	ENSG00000182196.9	ARL6IP4	-
chr14	21152746	21168735	+	ENSG00000259171.1	AL163636.6	-		chr12	123468027	123634562	-	ENSG00000090975.8	PITPNM2	Activated
chr14	21214051	21216539	+	ENSG00000181562.2	EDDM3A	-		chr12	123636867	123728561	-	ENSG00000051825.10	MPHOSPH9	-
chr14	21236586	21239107	+	ENSG00000181552.3	EDDM3B	-		chr12	123717463	123742506	+	ENSG00000130921.3	C12orf65	Activated
chr14	21249210	21250626	+	ENSG00000169413.2	RNASE6	-		chr12	123745528	123756881	-	ENSG00000111328.2	CDK2AP1	-
chr14	21269387	21271437	-	ENSG00000129538.9	RNASE1	-		chr12	123773656	123849390	-	ENSG00000139697.7	SBNO1	Activated
chr14	21359558	21360507	+	ENSG00000169397.3	RNASE3	-		chr12	123868320	123893905	+	ENSG00000183955.8	KMT5A	-
chr14	21423611	21424595	+	ENSG00000169385.2	RNASE2	-		chr12	123899936	123921264	-	ENSG00000150977.9	RILPL2	-
chr14	21457929	21465189	+	ENSG00000165792.13	METTL17	-		chr12	123942188	123957701	+	ENSG00000184209.14	SNRNP35	Activated
chr14	21467414	21470030	+	ENSG00000165794.5	SLC39A2	Repressed		chr12	123955925	124018265	-	ENSG00000188026.7	RILPL1	Activated
chr14	21484922	21539031	-	ENSG00000165795.16	NDRG2	Repressed		chr12	124069078	124083116	+	ENSG00000086598.6	TMED2	Activated
chr14	21492268	21504435	+	ENSG00000179636.10	TPPP2	-		chr12	124086624	124105488	+	ENSG00000111364.11	DDX55	-
chr14	21500977	21502054	+	ENSG00000255472.1	RP11-998D10.1	-		chr12	124104953	124118313	-	ENSG00000111361.8	EIF2B1	Activated
chr14	21500979	21502944	-	ENSG00000206150.3	RNASE13	-		chr12	124118375	124147153	+	ENSG00000111358.9	GTF2H3	Activated
chr14	21510385	21512393	+	ENSG00000165799.4	RNASE7	-		chr12	124155660	124192948	+	ENSG00000168778.7	TCTN2	-
chr14	21525981	21526614	+	ENSG00000173431.2	RNASE8	Repressed		chr12	124196865	124246302	+	ENSG00000185344.9	ATP6V0A2	-
chr14	21538429	21558399	+	ENSG00000165801.5	ARHGEF40	-		chr12	124247042	124420753	+	ENSG00000197653.10	DNAH10	-
chr14	21558205	21572881	-	ENSG00000165804.11	ZNF219	-		chr12	124403207	124457378	-	ENSG00000119242.4	CCDC92	Activated
chr14	21567096	21571883	+	ENSG00000232070.4	TMEM253	-		chr12	124410971	124419531	-	ENSG00000250091.2	DNAH10OS	-
chr14	21623026	21624222	-	ENSG00000169327.3	OR5AU1	-		chr12	124456392	124499986	+	ENSG00000179195.11	ZNF664	-
chr14	21677295	21737653	-	ENSG00000092199.13	HNRNPC	Activated		chr12	124457788	124800570	+	ENSG00000178882.9	RFLNA	Repressed
chr14	21756098	21819460	+	ENSG00000092200.8	RPGRIP1	-		chr12	124808961	125052135	-	ENSG00000196498.9	NCOR2	Activated
chr14	21819631	21852425	-	ENSG00000092201.5	SUPT16H	-		chr12	125261402	125367214	-	ENSG00000073060.11	SCARB1	Repressed
chr14	21853353	21924285	-	ENSG00000100888.8	CHD8	Activated		chr12	125396150	125401914	-	ENSG00000150991.10	UBC	-
chr14	21927179	21945132	-	ENSG00000129472.8	RAB2B	-		chr12	125431371	125473668	-	ENSG00000150990.3	DHX37	-
chr14	21944756	21967319	+	ENSG00000092203.9	TOX4	-		chr12	125478246	125515777	+	ENSG00000184992.10	BRI3BP	-
chr14	21966277	21979517	-	ENSG00000165819.7	METTL3	-		chr12	125549925	125627873	+	ENSG00000081760.12	AACS	-
chr14	21989232	22005350	-	ENSG00000165821.7	SALL2	-		chr12	125671382	126146917	+	ENSG00000139364.6	TMEM132B	-
chr14	22037934	22038875	-	ENSG00000169208.1	OR10G3	-		chr14	24521206	24538937	+	ENSG00000186648.10	CARMIL3	-
chr14	22101992	22103096	-	ENSG00000255582.1	OR10G2	-		chr14	24540046	24547309	+	ENSG00000100884.5	CPNE6	-
chr14	22133297	22134238	+	ENSG00000221977.1	OR4E2	-		chr14	24549316	24584223	-	ENSG00000129535.8	NRL	-
chr14	23025534	23027939	+	ENSG00000259003.1	AE000662.92	Activated		chr14	24563262	24579807	+	ENSG00000100889.7	PCK2	-
chr14	23033805	23058175	-	ENSG00000129562.6	DAD1	-		chr14	24583404	24594451	+	ENSG00000100897.13	DCAF11	-
chr14	23067146	23081265	+	ENSG00000100439.6	ABHD4	-		chr14	24590560	24601038	+	ENSG00000259371.1	RP11-468E2.6	-
chr14	23102673	23103716	-	ENSG00000255804.1	OR6J1	-		chr14	24600484	24602058	+	ENSG00000139914.6	FITM1	-
chr14	23235731	23241007	+	ENSG00000155463.8	OXA1L	Activated		chr14	24605367	24608176	+	ENSG00000092010.10	PSME1	-
chr14	23242431	23299029	-	ENSG00000155465.14	SLC7A7	Repressed		chr14	24608174	24610797	-	ENSG00000100908.9	EMC9	-
chr14	23286463	23291750	-	ENSG00000215306.1	AL135998.1	-		chr14	24612574	24616779	-	ENSG00000100911.9	PSME2	-
chr14	23299088	23304246	+	ENSG00000172590.14	MRPL52	-		chr14	24615892	24629870	+	ENSG00000092098.12	RNF31	-
chr14	23305766	23318236	+	ENSG00000157227.8	MMP14	-		chr14	24620427	24636611	+	ENSG00000259529.1	RP11-468E2.4	-
chr14	23340822	23350789	+	ENSG00000197324.4	LRP10	-		chr14	24630262	24635774	+	ENSG00000213928.4	IRF9	-
chr14	23352374	23356895	+	ENSG00000139890.5	REM2	Activated		chr14	24641062	24649463	+	ENSG00000100918.8	REC8	-
chr14	23369854	23388393	-	ENSG00000100461.13	RBM23	-		chr14	24649425	24658170	-	ENSG00000196497.11	IPO4	-
chr14	23389720	23398794	-	ENSG00000100462.11	PRMT5	-		chr14	24649601	24659622	-	ENSG00000259522.1	RP11-468E2.2	-
chr14	23415437	23426370	-	ENSG00000092036.12	HAUS4	-		chr14	24658349	24682679	-	ENSG00000100926.10	TM9SF1	-
chr14	23415479	23451467	-	ENSG00000259132.1	RP11-298I3.5	-		chr14	24658363	24682679	-	ENSG00000254692.1	TM9SF1	-
chr14	23440383	23451851	-	ENSG00000129474.11	AJUBA	-		chr14	24674903	24677568	+	ENSG00000139908.10	TSSK4	-
chr14	23456110	23479375	-	ENSG00000100802.10	C14orf93	Activated		chr14	24678789	24683075	-	ENSG00000254505.4	CHMP4A	Activated
chr14	23485752	23504439	-	ENSG00000100804.14	PSMB5	Activated		chr14	24683143	24685276	-	ENSG00000213920.4	MDP1	-
chr14	23511376	23513269	+	ENSG00000222028.2	PSMB11	-		chr14	24683161	24701558	-	ENSG00000255526.2	NEDD8-MDP1	Activated
chr14	23516271	23526747	-	ENSG00000139880.15	CDH24	-		chr14	24686058	24701660	-	ENSG00000129559.8	NEDD8	-
chr14	23527773	23564823	-	ENSG00000100813.10	ACIN1	-		chr14	24701628	24708448	+	ENSG00000100938.13	GMPR2	-
chr14	23563974	23569665	+	ENSG00000179933.4	C14orf119	-		chr14	24708849	24711880	-	ENSG00000092330.11	TINF2	-
chr14	23586513	23588825	-	ENSG00000092067.5	CEBPE	Repressed		chr14	24718320	24733638	-	ENSG00000092295.7	TGM1	-
chr14	23594504	23652883	-	ENSG00000092068.14	SLC7A8	-		chr14	24734744	24740945	-	ENSG00000100949.10	RABGGTA	-
chr14	23654525	23742686	+	ENSG00000215277.4	RNF212B	-		chr14	24759804	24769039	-	ENSG00000157379.9	DHRS1	-
chr14	23741666	23768656	-	ENSG00000215271.6	HOMEZ	-		chr14	24769068	24778330	+	ENSG00000196943.8	NOP9	-
chr14	23764852	23772057	-	ENSG00000235194.4	PPP1R3E	-		chr14	24774302	24780636	-	ENSG00000136305.7	CIDEB	Activated
chr14	23767999	23780968	+	ENSG00000129473.5	BCL2L2	-		chr14	24774940	24781259	+	ENSG00000213906.5	LTB4R2	-
chr14	23776044	23794578	+	ENSG00000258643.1	BCL2L2-PABPN1	-		chr14	24778161	24781252	+	ENSG00000272658.1	LTB4R2	-
chr14	23790498	23795394	+	ENSG00000100836.6	PABPN1	-		chr14	24780656	24787242	+	ENSG00000213903.4	LTB4R	Repressed
chr14	23790839	23791484	-	ENSG00000268702.1	AL049829.1	-		chr14	24787555	24804299	-	ENSG00000129467.9	ADCY4	Repressed
chr14	23815515	23822121	-	ENSG00000092096.10	SLC22A17	Repressed		chr14	24801516	24806588	-	ENSG00000258973.1	RP11-934B9.3	-
chr14	23825611	23834961	-	ENSG00000100842.8	EFS	Repressed		chr14	24805227	24809251	-	ENSG00000129465.11	RIPK3	-
chr14	23842018	23845612	+	ENSG00000166090.8	IL25	-		chr14	24834879	24848810	+	ENSG00000100968.9	NFATC4	-
chr14	23846017	23848981	+	ENSG00000166091.15	CMTM5	-		chr14	24867992	24888494	+	ENSG00000205978.5	NYNRIN	Activated
chr14	23851199	23877486	-	ENSG00000197616.7	MYH6	Repressed		chr14	24895738	24900160	-	ENSG00000139899.6	CBLN3	-
chr14	23881947	23904927	-	ENSG00000092054.12	MYH7	Repressed		chr14	24898492	24910540	+	ENSG00000100441.5	KHNYN	Activated
chr14	23938897	23979071	+	ENSG00000129460.11	NGDN	-		chr14	24908972	24912111	-	ENSG00000100445.12	SDR39U1	-
chr14	23990066	24025401	-	ENSG00000136367.12	ZFHX2	-		chr14	24970800	24977894	+	ENSG00000258744.1	RP11-80A15.1	-
chr14	24025216	24029480	+	ENSG00000259431.1	THTPA	-		chr14	24974559	24977471	-	ENSG00000092009.6	CMA1	-
chr14	24028774	24037279	-	ENSG00000213983.7	AP1G2	-		chr14	99977603	100070363	-	ENSG00000205476.4	CCDC85C	Repressed
chr14	24037244	24048009	-	ENSG00000092051.12	JPH4	-		chr14	100111447	100146906	+	ENSG00000182218.5	HHIPL1	-
chr14	24099324	24114848	+	ENSG00000100867.10	DHRS2	-		chr14	100150641	100193638	+	ENSG00000036530.4	CYP46A1	Repressed
chr14	24407940	24409196	+	ENSG00000197775.1	DHRS4-AS1	-		chr14	100204030	100408397	+	ENSG00000066629.12	EML1	Activated
chr14	24422795	24438488	+	ENSG00000157326.14	DHRS4	-		chr14	100437786	100610573	+	ENSG00000196405.8	EVL	Activated
chr14	24439148	24475617	+	ENSG00000187630.10	DHRS4L2	Repressed		chr14	100612756	100626500	-	ENSG00000168350.6	DEGS2	Repressed
chr14	59655364	59838123	+	ENSG00000100592.11	DAAM1	Activated		chr14	100704635	100749129	+	ENSG00000100811.6	YY1	Activated
chr14	59895740	59932060	-	ENSG00000181619.11	GPR135	-		chr14	100757448	100772884	-	ENSG00000197119.8	SLC25A29	-
chr14	59927081	59951148	-	ENSG00000126790.7	L3HYPDH	Activated		chr14	100789674	100796715	+	ENSG00000140107.10	SLC25A47	-
chr14	59951161	59972128	+	ENSG00000050130.13	JKAMP	Activated		chr14	100800125	100843142	-	ENSG00000140105.13	WARS	-
chr14	59971257	60043549	-	ENSG00000151838.7	CCDC175	-		chr14	100842755	100996640	+	ENSG00000176473.9	WDR25	-
chr14	60062694	60337684	-	ENSG00000139970.12	RTN1	-		chr14	101003486	101053750	-	ENSG00000183092.11	BEGAIN	Repressed
chr14	60386431	60530277	+	ENSG00000131951.6	LRRC9	-		chr15	59157374	59389618	+	ENSG00000157450.11	RNF111	Activated
chr14	71787166	72207946	+	ENSG00000197555.5	SIPA1L1	Activated		chr15	59171244	59225852	-	ENSG00000137776.12	SLTM	-
chr14	72399156	73030654	+	ENSG00000182732.12	RGS6	-		chr15	59397277	59417244	+	ENSG00000157456.3	CCNB2	-
chr14	72456191	72458326	-	ENSG00000257040.1	AC005477.1	-		chr15	59427113	59665099	-	ENSG00000157483.4	MYO1E	Activated
chr14	100111447	100146906	+	ENSG00000182218.5	HHIPL1	-		chr15	59439899	59440054	+	ENSG00000268327.1	C15ORF31	-
chr14	100150641	100193638	+	ENSG00000036530.4	CYP46A1	Repressed		chr15	59499042	59500705	+	ENSG00000171989.4	LDHAL6B	-
chr14	100204030	100408397	+	ENSG00000066629.12	EML1	Activated		chr15	59664892	59815748	+	ENSG00000157470.7	FAM81A	-
chr15	51500254	51630807	-	ENSG00000137869.9	CYP19A1	Repressed		chr15	59887074	59932438	+	ENSG00000140297.8	GCNT3	-
chr15	51633826	51700210	+	ENSG00000186417.9	GLDN	Repressed		chr15	59930261	59949740	-	ENSG00000140307.6	GTF2A2	-
chr15	51739908	51915030	-	ENSG00000104093.9	DMXL2	Activated		chr15	59951345	59981733	-	ENSG00000140299.7	BNIP2	Activated
chr15	51973550	52013223	+	ENSG00000104112.4	SCG3	-		chr15	60296421	60353929	+	ENSG00000171956.5	FOXB1	-
chr15	52015208	52043782	-	ENSG00000140280.9	LYSMD2	-		chr15	60639333	60695082	-	ENSG00000182718.12	ANXA2	-
chr15	52043758	52108565	+	ENSG00000128872.5	TMOD2	Activated		chr15	60711808	60771359	-	ENSG00000128915.7	ICE2	-
chr15	52121825	52239492	+	ENSG00000138594.8	TMOD3	Activated		chr15	60780483	61521518	-	ENSG00000069667.11	RORA	-
chr15	52230222	52264003	-	ENSG00000166477.8	LEO1	-		chr15	62682725	63136830	+	ENSG00000171914.10	TLN2	Activated
chr15	52244303	52358462	+	ENSG00000069956.7	MAPK6	Activated		chr15	63334831	63364114	+	ENSG00000140416.15	TPM1	-
chr15	67835047	68099461	+	ENSG00000137764.15	MAP2K5	Activated		chr15	63413999	63434260	+	ENSG00000103642.7	LACTB	-
chr15	68112042	68126899	+	ENSG00000188779.6	SKOR1	-		chr15	63418071	63450220	-	ENSG00000185088.8	RPS27L	-
chr15	68346517	68483096	+	ENSG00000033800.9	PIAS1	-		chr15	63481668	63559981	+	ENSG00000166128.8	RAB8B	Activated
chr15	68483043	68498417	-	ENSG00000129007.10	CALML4	-		chr15	63568217	63601325	+	ENSG00000138613.9	APH1B	Activated
chr15	68486139	68522056	-	ENSG00000260007.1	RP11-315D16.2	-		chr15	63613577	63674360	-	ENSG00000074410.9	CA12	Activated
chr15	68499330	68549549	-	ENSG00000128973.7	CLN6	Repressed		chr15	63796793	63886839	+	ENSG00000140455.12	USP3	Activated
chr15	68570141	68588203	+	ENSG00000169018.5	FEM1B	Activated		chr15	63889552	63894627	+	ENSG00000197361.5	FBXL22	-
chr15	68594050	68724501	-	ENSG00000137809.12	ITGA11	Activated in MT, Repressed in MB		chr15	63900817	64126141	-	ENSG00000103657.9	HERC1	Activated
chr15	68871308	69020145	+	ENSG00000103647.8	CORO2B	Activated		chr15	64199235	64364232	-	ENSG00000035664.7	DAPK2	Repressed
chr15	69070874	69113236	-	ENSG00000140350.11	ANP32A	-		chr15	64364758	64386217	-	ENSG00000166797.6	CIAO2A	-
chr15	69110560	69239150	+	ENSG00000258484.3	SPESP1	Repressed		chr15	64386322	64438289	+	ENSG00000028528.10	SNX1	Activated
chr15	80125927	80189721	-	ENSG00000136371.5	MTHFS	-		chr15	64443914	64449680	+	ENSG00000157734.9	SNX22	-
chr15	80137537	80216096	-	ENSG00000259332.2	ST20-MTHFS	-		chr15	64448011	64455404	-	ENSG00000166794.4	PPIB	-
chr15	80191182	80216044	-	ENSG00000180953.7	ST20	-		chr15	64457716	64648442	-	ENSG00000169118.11	CSNK1G1	-
chr15	80215113	80217194	+	ENSG00000259642.1	ST20-AS1	-		chr15	64472547	64665980	-	ENSG00000259316.3	CTD-2116N17.1	Activated
chr15	80215507	80217194	+	ENSG00000257028.1	C15ORF37	-		chr15	64657193	64679886	-	ENSG00000166803.6	PCLAF	-
chr15	80253231	80263788	-	ENSG00000140379.7	BCL2A1	-		chr15	64679947	64747502	+	ENSG00000103671.5	TRIP4	Activated
chr15	80351910	80430735	+	ENSG00000086666.14	ZFAND6	-		chr15	64752941	64978264	+	ENSG00000180357.5	ZNF609	Activated
chr15	80444832	80479288	+	ENSG00000103876.7	FAH	Activated		chr15	64979772	64995480	-	ENSG00000180304.10	OAZ2	Activated
chr15	80637195	80695917	-	ENSG00000259495.1	RP11-210M15.2	-		chr15	65032091	65067786	-	ENSG00000166831.4	RBPMS2	-
chr15	80696692	80890278	+	ENSG00000172379.14	ARNT2	Activated		chr15	65107831	65117867	-	ENSG00000140451.8	PIF1	Activated
chr15	80972025	81047962	+	ENSG00000136379.7	ABHD17C	-		chr15	65134082	65223118	+	ENSG00000249240.2	AC069368.3	-
chr15	81071684	81244117	+	ENSG00000103888.11	CEMIP	Activated in MT, Repressed in MB		chr15	65134088	65160206	+	ENSG00000241839.5	PLEKHO2	-
chr15	81188532	81202118	-	ENSG00000259649.1	RP11-351M8.1	Repressed		chr15	65204101	65251042	+	ENSG00000166839.12	ANKDD1A	-
chr15	81239667	81282219	-	ENSG00000117899.6	MESD	Activated		chr15	65255362	65282648	-	ENSG00000090487.6	SPG21	-
chr15	81293295	81296342	+	ENSG00000140406.2	TLNRD1	-		chr15	65294845	65321977	-	ENSG00000103707.5	MTFMT	-
chr15	81299374	81441516	+	ENSG00000156206.9	CFAP161	Repressed		chr17	62293	236045	-	ENSG00000181031.11	RPH3AL	Repressed
chr15	81451916	81605104	+	ENSG00000172349.12	IL16	Repressed		chr17	260118	273510	+	ENSG00000187624.7	C17orf97	Repressed
chr15	81601394	81616524	-	ENSG00000172345.9	STARD5	-		chr17	289769	295730	-	ENSG00000183688.4	RFLNB	-
chr15	81623558	81666554	-	ENSG00000188869.8	TMC3	-		chr17	411908	624957	-	ENSG00000141252.15	VPS53	Activated
chr15	90373831	90437574	-	ENSG00000157823.12	AP3S2	-		chr17	635652	646206	+	ENSG00000167695.10	FAM57A	Activated
chr15	90377540	90456114	-	ENSG00000250021.3	C15orf38-AP3S2	-		chr17	647654	657239	-	ENSG00000179409.6	GEMIN4	Activated
chr15	90443159	90456188	-	ENSG00000242498.3	ARPIN	-		chr17	660337	685581	-	ENSG00000167699.9	GLOD4	-
chr15	90544624	90625438	+	ENSG00000140548.5	ZNF710	Activated		chr17	685513	695749	+	ENSG00000171861.6	MRM3	Activated
chr15	90626277	90645736	-	ENSG00000182054.5	IDH2	-		chr17	702553	883010	-	ENSG00000167693.12	NXN	Repressed
chr15	90703836	90772911	+	ENSG00000185033.10	SEMA4B	-		chr17	812872	814452	+	ENSG00000262003.1	RP11-676J12.7	-
chr15	90773207	90777279	-	ENSG00000185043.6	CIB1	-		chr17	900357	906911	+	ENSG00000177370.4	TIMM22	-
chr15	90777040	90785315	+	ENSG00000183208.8	GDPGP1	-		chr17	906758	1132315	-	ENSG00000159842.10	ABR	Repressed
chr15	90792762	90808199	+	ENSG00000213471.4	TTLL13P	Activated		chr17	1173853	1174754	+	ENSG00000205899.3	BHLHA9	-
chr15	90792788	90815440	+	ENSG00000261147.1	RP11-697E2.6	Activated		chr17	1182957	1204281	+	ENSG00000184811.3	TRARG1	-
chr15	90808891	90816463	+	ENSG00000182768.7	NGRN	-		chr17	1247566	1303672	-	ENSG00000108953.12	YWHAE	Activated
chr15	90890819	90892669	-	ENSG00000238244.2	GABARAPL3	Repressed		chr17	1323983	1366456	-	ENSG00000167193.7	CRK	Activated
chr15	90895477	90909324	+	ENSG00000196391.6	ZNF774	-		chr17	1367392	1396106	-	ENSG00000197879.10	MYO1C	-
chr15	90931450	91045475	+	ENSG00000140575.8	IQGAP1	Activated		chr17	1397865	1420182	-	ENSG00000132376.15	INPP5K	-
chr15	91073157	91188577	+	ENSG00000140577.11	CRTC3	Activated		chr17	1421012	1466110	-	ENSG00000174238.10	PITPNA	-
chr15	91260558	91358859	+	ENSG00000197299.6	BLM	-		chr17	1472561	1532180	-	ENSG00000167703.10	SLC43A2	Repressed
chr15	91411822	91426688	+	ENSG00000140564.6	FURIN	Activated		chr17	1537152	1549041	-	ENSG00000074660.11	SCARF1	-
chr15	91426925	91439006	+	ENSG00000182511.7	FES	Activated		chr17	1549444	1553371	-	ENSG00000167705.7	RILP	Activated
chr15	91445448	91465814	+	ENSG00000196547.10	MAN2A2	-		chr17	1553923	1588176	-	ENSG00000174231.12	PRPF8	-
chr15	91473410	91497323	+	ENSG00000140553.12	UNC45A	Activated		chr17	1611064	1613732	-	ENSG00000185561.8	TLCD2	-
chr15	91474148	91475799	-	ENSG00000184508.6	HDDC3	-		chr17	1619817	1641893	+	ENSG00000167716.14	WDR81	Activated
chr15	91498100	91506349	+	ENSG00000166965.8	RCCD1	-		chr17	1646130	1658562	+	ENSG00000167711.9	SERPINF2	Repressed
chr15	91509270	91538859	-	ENSG00000198901.9	PRC1	-		chr17	1665253	1680868	+	ENSG00000132386.6	SERPINF1	-
chr15	91541646	91565833	-	ENSG00000184056.10	VPS33B	-		chr17	1682779	1733928	-	ENSG00000186532.7	SMYD4	Activated
chr15	91643180	91844539	+	ENSG00000185518.7	SV2B	-		chr17	1732996	1803376	+	ENSG00000132383.7	RPA1	-
chr15	92937058	93011958	+	ENSG00000140557.7	ST8SIA2	-		chr17	1837971	1928639	-	ENSG00000185924.6	RTN4RL1	Repressed
chr15	93014884	93044347	+	ENSG00000183643.2	C15orf32	-		chr17	1933404	1946724	+	ENSG00000108963.13	DPH1	Activated
chr15	93160673	93353114	-	ENSG00000185442.8	FAM174B	-		chr17	1945327	1946724	+	ENSG00000262664.1	OVCA2	-
chr15	93426526	93571237	+	ENSG00000173575.14	CHD2	Activated		chr17	1957448	1962981	+	ENSG00000177374.8	HIC1	-
chr15	93586636	93632433	-	ENSG00000182175.9	RGMA	-		chr17	1963133	2207065	-	ENSG00000070366.9	SMG6	Activated
chr15	93749295	93751277	+	ENSG00000269360.1	AC112693.2	-		chr17	2206677	2228554	+	ENSG00000167720.8	SRR	-
chr15	94774767	95023632	+	ENSG00000140563.10	MCTP2	-		chr17	2225797	2240801	-	ENSG00000167721.6	TSR1	-
chr15	96831280	96831660	-	ENSG00000205148.1	AC016251.1	-		chr17	2240792	2284352	+	ENSG00000141258.8	SGSM2	-
chr15	96869167	96883492	+	ENSG00000185551.8	NR2F2	-		chr17	2287354	2304412	-	ENSG00000070444.10	MNT	-
chr15	96904487	96904900	+	ENSG00000268484.1	AC087477.1	Repressed		chr17	2308856	2415185	-	ENSG00000127804.8	METTL16	Activated
chr15	97326619	97328845	+	ENSG00000185594.4	SPATA8	-		chr17	2310279	2318731	-	ENSG00000205821.4	AC006435.1	-
chr17	62293	236045	-	ENSG00000181031.11	RPH3AL	Repressed		chr17	2496504	2588909	+	ENSG00000007168.8	PAFAH1B1	Activated
chr17	260118	273510	+	ENSG00000187624.7	C17orf97	Repressed		chr17	2592680	2615957	-	ENSG00000132361.12	CLUH	Activated
chr17	289769	295730	-	ENSG00000183688.4	RFLNB	-		chr17	2680350	2941033	+	ENSG00000132359.9	RAP1GAP2	Repressed
chr17	411908	624957	-	ENSG00000141252.15	VPS53	Activated		chr17	2965963	2966901	-	ENSG00000262628.1	OR1D5	-
chr17	635652	646206	+	ENSG00000167695.10	FAM57A	Activated		chr17	2995352	2996290	-	ENSG00000184166.1	OR1D2	-
chr17	647654	657239	-	ENSG00000179409.6	GEMIN4	Activated		chr17	3029878	3030875	-	ENSG00000183024.3	OR1G1	-
chr17	660337	685581	-	ENSG00000167699.9	GLOD4	-		chr17	3100813	3101742	+	ENSG00000172150.4	OR1A2	-
chr17	685513	695749	+	ENSG00000171861.6	MRM3	Activated		chr17	3118915	3119844	+	ENSG00000172146.1	OR1A1	-
chr17	702553	883010	-	ENSG00000167693.12	NXN	Repressed		chr17	3181193	3182268	-	ENSG00000221882.2	OR3A2	-
chr17	812872	814452	+	ENSG00000262003.1	RP11-676J12.7	-		chr17	3194929	3195876	-	ENSG00000180090.3	OR3A1	-
chr17	900357	906911	+	ENSG00000177370.4	TIMM22	-		chr17	3300398	3301704	-	ENSG00000180016.2	OR1E1	-
chr17	906758	1132315	-	ENSG00000159842.10	ABR	Repressed		chr17	3323862	3324827	+	ENSG00000159961.1	OR3A3	-
chr17	1173853	1174754	+	ENSG00000205899.3	BHLHA9	-		chr17	3336164	3337135	-	ENSG00000127780.3	OR1E2	-
chr17	1182957	1204281	+	ENSG00000184811.3	TRARG1	-		chr17	3343313	3417146	-	ENSG00000141255.8	SPATA22	-
chr17	1247566	1303672	-	ENSG00000108953.12	YWHAE	Activated		chr17	3375668	3406713	+	ENSG00000108381.6	ASPA	-
chr17	1323983	1366456	-	ENSG00000167193.7	CRK	Activated		chr17	3413796	3461289	-	ENSG00000167723.10	TRPV3	-
chr17	1367392	1396106	-	ENSG00000197879.10	MYO1C	-		chr17	3468738	3500392	-	ENSG00000196689.6	TRPV1	-
chr17	1397865	1420182	-	ENSG00000132376.15	INPP5K	-		chr17	3468738	3539543	-	ENSG00000262304.1	SHPK	-
chr17	1421012	1466110	-	ENSG00000174238.10	PITPNA	-		chr17	3511556	3539616	-	ENSG00000197417.7	SHPK	-
chr17	1472561	1532180	-	ENSG00000167703.10	SLC43A2	Repressed		chr17	3539762	3564836	+	ENSG00000040531.10	CTNS	Activated
chr17	1537152	1549041	-	ENSG00000074660.11	SCARF1	-		chr17	3566196	3571976	-	ENSG00000213977.3	TAX1BP3	-
chr17	1549444	1553371	-	ENSG00000167705.7	RILP	Activated		chr17	3566357	3599488	-	ENSG00000257950.3	P2RX5-TAX1BP3	Repressed
chr17	1553923	1588176	-	ENSG00000174231.12	PRPF8	-		chr17	3572109	3572962	+	ENSG00000127774.6	EMC6	-
chr17	1611064	1613732	-	ENSG00000185561.8	TLCD2	-		chr17	3575493	3599698	-	ENSG00000083454.17	P2RX5	Repressed
chr17	1619817	1641893	+	ENSG00000167716.14	WDR81	Activated		chr17	3617922	3704537	-	ENSG00000083457.7	ITGAE	Repressed
chr17	1646130	1658562	+	ENSG00000167711.9	SERPINF2	Repressed		chr17	3627211	3630067	+	ENSG00000177602.4	HASPIN	-
chr17	1665253	1680868	+	ENSG00000132386.6	SERPINF1	-		chr17	3714460	3749545	-	ENSG00000074356.12	NCBP3	Activated
chr17	1682779	1733928	-	ENSG00000186532.7	SMYD4	Activated		chr17	3763609	3798185	-	ENSG00000004660.10	CAMKK1	Activated
chr17	1732996	1803376	+	ENSG00000132383.7	RPA1	-		chr17	3799886	3819794	-	ENSG00000108405.3	P2RX1	-
chr17	1837971	1928639	-	ENSG00000185924.6	RTN4RL1	Repressed		chr17	3827169	3867736	-	ENSG00000074370.13	ATP2A3	-
chr17	1933404	1946724	+	ENSG00000108963.13	DPH1	Activated		chr17	3907739	4046314	-	ENSG00000074755.10	ZZEF1	Activated
chr17	1945327	1946724	+	ENSG00000262664.1	OVCA2	-		chr17	4046462	4090605	+	ENSG00000167740.5	CYB5D2	Activated
chr17	1957448	1962981	+	ENSG00000177374.8	HIC1	-		chr17	4067201	4167274	-	ENSG00000185722.12	ANKFY1	Activated
chr17	1963133	2207065	-	ENSG00000070366.9	SMG6	Activated		chr17	4172554	4269923	-	ENSG00000132388.8	UBE2G1	Activated
chr17	2206677	2228554	+	ENSG00000167720.8	SRR	-		chr17	4336983	4391503	+	ENSG00000182557.3	SPNS3	-
chr17	2225797	2240801	-	ENSG00000167721.6	TSR1	-		chr17	4402133	4442330	+	ENSG00000183018.4	SPNS2	Repressed
chr17	2240792	2284352	+	ENSG00000141258.8	SGSM2	-		chr17	4442192	4458926	-	ENSG00000132382.10	MYBBP1A	-
chr17	2287354	2304412	-	ENSG00000070444.10	MNT	-		chr17	4460222	4464113	-	ENSG00000167741.6	GGT6	-
chr17	2308856	2415185	-	ENSG00000127804.8	METTL16	Activated		chr17	4487294	4511614	+	ENSG00000188176.7	SMTNL2	-
chr17	2310279	2318731	-	ENSG00000205821.4	AC006435.1	-		chr17	4534197	4545589	-	ENSG00000161905.8	ALOX15	-
chr17	2496504	2588909	+	ENSG00000007168.8	PAFAH1B1	Activated		chr17	4574679	4607632	-	ENSG00000141456.10	PELP1	-
chr17	2592680	2615957	-	ENSG00000132361.12	CLUH	Activated		chr17	4613784	4624794	+	ENSG00000141480.13	ARRB2	-
chr17	2680350	2941033	+	ENSG00000132359.9	RAP1GAP2	Repressed		chr17	4634723	4636905	+	ENSG00000161920.5	MED11	Activated
chr17	2965963	2966901	-	ENSG00000262628.1	OR1D5	-		chr17	4636821	4643217	-	ENSG00000161921.10	CXCL16	Repressed
chr17	2995352	2996290	-	ENSG00000184166.1	OR1D2	-		chr17	4643319	4649411	+	ENSG00000141497.9	ZMYND15	-
chr17	3029878	3030875	-	ENSG00000183024.3	OR1G1	-		chr17	4675179	4686506	+	ENSG00000142484.5	TM4SF5	-
chr17	3100813	3101742	+	ENSG00000172150.4	OR1A2	-		chr17	4688580	4689728	-	ENSG00000182853.7	VMO1	-
chr17	3118915	3119844	+	ENSG00000172146.1	OR1A1	-		chr17	4692254	4693685	+	ENSG00000182327.7	GLTPD2	-
chr17	3181193	3182268	-	ENSG00000221882.2	OR3A2	-		chr17	4699439	4701790	+	ENSG00000142507.5	PSMB6	-
chr17	3194929	3195876	-	ENSG00000180090.3	OR3A1	-		chr17	4710391	4726729	+	ENSG00000129219.9	PLD2	Activated
chr17	3300398	3301704	-	ENSG00000180016.2	OR1E1	-		chr17	4736683	4801356	+	ENSG00000141503.11	MINK1	Activated
chr17	3323862	3324827	+	ENSG00000159961.1	OR3A3	-		chr17	4801069	4806369	-	ENSG00000108556.7	CHRNE	Activated
chr17	3336164	3337135	-	ENSG00000127780.3	OR1E2	-		chr17	4802713	4806227	+	ENSG00000205710.3	C17orf107	Activated
chr17	3343313	3417146	-	ENSG00000141255.8	SPATA22	-		chr17	4835592	4838325	+	ENSG00000185245.6	GP1BA	-
chr17	3375668	3406713	+	ENSG00000108381.6	ASPA	-		chr17	4840425	4843546	-	ENSG00000108528.9	SLC25A11	-
chr17	3413796	3461289	-	ENSG00000167723.10	TRPV3	-		chr17	4843303	4848517	+	ENSG00000108523.11	RNF167	-
chr17	3468738	3500392	-	ENSG00000196689.6	TRPV1	-		chr17	4848947	4852356	-	ENSG00000108518.7	PFN1	-
chr17	3468738	3539543	-	ENSG00000262304.1	SHPK	-		chr17	4851387	4860426	+	ENSG00000108515.13	ENO3	-
chr17	3511556	3539616	-	ENSG00000197417.7	SHPK	-		chr17	4862521	4871167	-	ENSG00000091640.3	SPAG7	-
chr17	3539762	3564836	+	ENSG00000040531.10	CTNS	Activated		chr17	4871287	4890960	-	ENSG00000108509.16	CAMTA2	-
chr17	3566196	3571976	-	ENSG00000213977.3	TAX1BP3	-		chr17	4891425	4900905	-	ENSG00000196388.4	INCA1	-
chr17	3566357	3599488	-	ENSG00000257950.3	P2RX5-TAX1BP3	Repressed		chr17	4901243	4931696	+	ENSG00000129250.7	KIF1C	Activated
chr17	3572109	3572962	+	ENSG00000127774.6	EMC6	-		chr17	4935895	4955304	-	ENSG00000132517.10	SLC52A1	-
chr17	3575493	3599698	-	ENSG00000083454.17	P2RX5	Repressed		chr17	4981543	4999669	+	ENSG00000180787.5	ZFP3	-
chr17	3617922	3704537	-	ENSG00000083457.7	ITGAE	Repressed		chr17	5008836	5026411	-	ENSG00000167840.9	ZNF232	Repressed
chr17	3627211	3630067	+	ENSG00000177602.4	HASPIN	-		chr17	5019733	5078329	+	ENSG00000129204.12	USP6	-
chr17	3714460	3749545	-	ENSG00000074356.12	NCBP3	Activated		chr17	21279509	21323179	+	ENSG00000184185.5	KCNJ12	Repressed
chr17	3763609	3798185	-	ENSG00000004660.10	CAMKK1	Activated		chr17	21428051	21477722	-	ENSG00000212719.6	C17orf51	-
chr17	3799886	3819794	-	ENSG00000108405.3	P2RX1	-		chr17	21729601	21731762	+	ENSG00000263563.1	UBBP4	-
chr17	3827169	3867736	-	ENSG00000074370.13	ATP2A3	-		chr17	22022437	22023991	+	ENSG00000256618.1	MTRNR2L1	-
chr17	3907739	4046314	-	ENSG00000074755.10	ZZEF1	Activated		chr17	33905065	34053436	+	ENSG00000006125.12	AP2B1	-
chr17	4046462	4090605	+	ENSG00000167740.5	CYB5D2	Activated		chr17	34058668	34070540	+	ENSG00000141150.3	RASL10B	-
chr17	4067201	4167274	-	ENSG00000185722.12	ANKFY1	Activated		chr17	34071530	34079897	-	ENSG00000132139.8	GAS2L2	-
chr17	4172554	4269923	-	ENSG00000132388.8	UBE2G1	Activated		chr17	34083268	34122711	-	ENSG00000129270.11	MMP28	Repressed
chr17	4336983	4391503	+	ENSG00000182557.3	SPNS3	-		chr17	34087916	34092098	+	ENSG00000154768.4	C17orf50	-
chr17	4402133	4442330	+	ENSG00000183018.4	SPNS2	Repressed		chr17	34136459	34191619	+	ENSG00000172660.7	TAF15	Activated
chr17	4442192	4458926	-	ENSG00000132382.10	MYBBP1A	-		chr17	34181955	34195895	-	ENSG00000172653.7	C17orf66	Repressed
chr17	4460222	4464113	-	ENSG00000167741.6	GGT6	-		chr17	34198495	34207797	-	ENSG00000161570.4	CCL5	-
chr17	4487294	4511614	+	ENSG00000188176.7	SMTNL2	-		chr17	34245070	34257777	-	ENSG00000187456.9	RDM1	-
chr17	4534197	4545589	-	ENSG00000161905.8	ALOX15	-		chr17	34261522	34270703	-	ENSG00000161572.6	LYZL6	-
chr17	4574679	4607632	-	ENSG00000141456.10	PELP1	-		chr17	34303529	34308532	-	ENSG00000161573.6	CCL16	-
chr17	4613784	4624794	+	ENSG00000141480.13	ARRB2	-		chr17	34310327	34329100	-	ENSG00000213494.5	CCL14	-
chr17	4634723	4636905	+	ENSG00000161920.5	MED11	Activated		chr17	34310692	34317306	+	ENSG00000266956.1	CTB-186H2.3	-
chr17	4636821	4643217	-	ENSG00000161921.10	CXCL16	Repressed		chr17	34310692	34328660	-	ENSG00000161574.11	CCL15-CCL14	-
chr17	4643319	4649411	+	ENSG00000141497.9	ZMYND15	-		chr17	34323476	34329084	-	ENSG00000267596.1	CCL15	-
chr17	4675179	4686506	+	ENSG00000142484.5	TM4SF5	-		chr17	34340096	34345005	-	ENSG00000167236.2	CCL23	-
chr17	4688580	4689728	-	ENSG00000182853.7	VMO1	-		chr17	34391640	34399392	+	ENSG00000006074.4	CCL18	-
chr17	4692254	4693685	+	ENSG00000182327.7	GLTPD2	-		chr17	34415602	34417515	-	ENSG00000006075.11	CCL3	-
chr17	4699439	4701790	+	ENSG00000142507.5	PSMB6	-		chr17	34430983	34433014	+	ENSG00000129277.9	CCL4	-
chr17	4710391	4726729	+	ENSG00000129219.9	PLD2	Activated		chr17	34493061	34503996	-	ENSG00000224226.4	TBC1D3B	-
chr17	4736683	4801356	+	ENSG00000141503.11	MINK1	Activated		chr17	34522268	34524157	-	ENSG00000256515.3	CCL3L3	-
chr17	4801069	4806369	-	ENSG00000108556.7	CHRNE	Activated		chr17	34538310	34540280	+	ENSG00000205020.7	CCL4L1	-
chr17	4802713	4806227	+	ENSG00000205710.3	C17orf107	Activated		chr17	34580902	34757050	-	ENSG00000234972.4	TBC1D3C	-
chr17	4835592	4838325	+	ENSG00000185245.6	GP1BA	-		chr17	34581086	34808061	-	ENSG00000242384.3	TBC1D3H	-
chr17	4840425	4843546	-	ENSG00000108528.9	SLC25A11	-		chr17	34623842	34625731	-	ENSG00000205021.9	CCL3L1	-
chr17	4843303	4848517	+	ENSG00000108523.11	RNF167	-		chr17	34639793	34641846	+	ENSG00000197262.8	CCL4L2	-
chr17	4848947	4852356	-	ENSG00000108518.7	PFN1	-		chr17	34745936	34808104	-	ENSG00000161583.12	TBC1D3G	-
chr17	4851387	4860426	+	ENSG00000108515.13	ENO3	-		chr17	34842473	34855154	+	ENSG00000108278.7	ZNHIT3	-
chr17	4862521	4871167	-	ENSG00000091640.3	SPAG7	-		chr17	34851477	34899284	-	ENSG00000141140.12	MYO19	-
chr17	4871287	4890960	-	ENSG00000108509.16	CAMTA2	-		chr17	34890847	34895159	+	ENSG00000184886.3	PIGW	-
chr17	4891425	4900905	-	ENSG00000196388.4	INCA1	-		chr17	34900737	34946278	+	ENSG00000005955.8	GGNBP2	-
chr17	4901243	4931696	+	ENSG00000129250.7	KIF1C	Activated		chr17	34948228	34957235	+	ENSG00000108272.9	DHRS11	-
chr17	4935895	4955304	-	ENSG00000132517.10	SLC52A1	-		chr17	34958001	34965407	+	ENSG00000129282.8	MRM1	Activated
chr17	4981543	4999669	+	ENSG00000180787.5	ZFP3	-		chr17	35294084	35301917	+	ENSG00000132130.7	LHX1	-
chr17	5008836	5026411	-	ENSG00000167840.9	ZNF232	Repressed		chr17	35306175	35414171	+	ENSG00000108270.6	AATF	-
chr17	5019733	5078329	+	ENSG00000129204.12	USP6	-		chr17	35441923	35766909	-	ENSG00000132142.15	ACACA	-
chr17	5082831	5095178	-	ENSG00000180626.9	ZNF594	-		chr17	35732928	35749662	+	ENSG00000167230.6	C17orf78	-
chr17	5112256	5138155	-	ENSG00000161929.10	SCIMP	-		chr17	35766965	35839835	+	ENSG00000108264.12	TADA2A	Activated
chr17	5185558	5289129	+	ENSG00000029725.12	RABEP1	-		chr17	35849937	35873603	+	ENSG00000161326.8	DUSP14	Activated
chr17	5264258	5323480	-	ENSG00000108559.7	NUP88	-		chr17	35874900	35969544	-	ENSG00000006114.11	SYNRG	Activated
chr17	5322961	5336196	+	ENSG00000129197.10	RPAIN	-		chr17	35969787	36003493	-	ENSG00000141141.10	DDX52	Activated
chr17	5336097	5352150	-	ENSG00000108561.4	C1QBP	Activated		chr17	36046435	36105237	-	ENSG00000108753.8	HNF1B	-
chr17	5344232	5372380	-	ENSG00000005100.8	DHX33	-		chr17	36283971	36294915	+	ENSG00000185128.11	TBC1D3F	-
chr17	5374571	5390131	-	ENSG00000072849.6	DERL2	-		chr17	59667794	59668563	-	ENSG00000253506.1	NACA2	-
chr17	5389605	5394134	+	ENSG00000167842.11	MIS12	Activated		chr17	59758627	59940882	-	ENSG00000136492.4	BRIP1	-
chr17	5402747	5522744	-	ENSG00000091592.11	NLRP1	Activated		chr17	59942731	60005377	-	ENSG00000108506.7	INTS2	Activated
chr17	5675554	6027747	+	ENSG00000179314.9	WSCD1	Repressed		chr17	60019966	60142643	-	ENSG00000108510.5	MED13	Activated
chr17	6297013	6338519	-	ENSG00000129221.10	AIPL1	-		chr17	60349848	60360276	-	ENSG00000270033.1	RP11-51L5.7	-
chr17	6347735	6354789	+	ENSG00000129195.11	PIMREG	Activated		chr17	60447579	60493837	+	ENSG00000172421.3	EFCAB3	-
chr17	6354584	6459814	-	ENSG00000091622.11	PITPNM3	Repressed		chr17	60501228	60527454	+	ENSG00000087995.11	METTL2A	-
chr17	6481468	6544247	-	ENSG00000198920.5	KIAA0753	-		chr17	60536019	60692842	+	ENSG00000146872.13	TLK2	Activated
chr17	6544078	6547861	+	ENSG00000129235.6	TXNDC17	-		chr17	60704762	60770958	+	ENSG00000011028.9	MRC2	Activated
chr17	6546635	6554954	-	ENSG00000108590.6	MED31	-		chr17	60778675	60885705	-	ENSG00000173838.7	2010-03-01	Activated
chr17	6554971	6556791	+	ENSG00000212734.4	C17orf100	-		chr17	61086917	61505060	+	ENSG00000170921.10	TANC2	Activated
chr17	6588032	6616886	-	ENSG00000141485.11	SLC13A5	-		chr17	61509665	61523739	-	ENSG00000008283.11	CYB561	Activated
chr17	6658766	6678966	+	ENSG00000132530.12	XAF1	-		chr17	61554422	61599205	+	ENSG00000159640.10	ACE	-
chr17	6679542	6700420	+	ENSG00000177294.6	FBXO39	-		chr17	61562184	61599209	+	ENSG00000264813.1	ACE	-
chr17	6692452	6735080	-	ENSG00000167858.8	TEKT1	-		chr17	61600695	61626338	+	ENSG00000173826.10	KCNH6	-
chr17	13972813	14111994	+	ENSG00000006695.6	COX10	-		chr17	61627822	61671639	+	ENSG00000136485.10	DCAF7	-
chr17	70036164	70036872	+	ENSG00000267893.1	AC007461.1	-		chr17	61678231	61685725	+	ENSG00000136463.7	TACO1	-
chr17	70117161	70122561	+	ENSG00000125398.5	SOX9	-		chr17	61699775	61773663	+	ENSG00000198909.3	MAP3K3	-
chr17	70642088	71088851	-	ENSG00000133195.7	SLC39A11	-		chr17	61773262	61778532	-	ENSG00000136490.4	LIMD2	Activated
chr17	71161151	71167185	+	ENSG00000180616.4	SSTR2	-		chr17	61780192	61819330	-	ENSG00000266173.1	STRADA	-
chr17	71189129	71204646	+	ENSG00000166685.7	COG1	Activated		chr17	61780205	61829457	-	ENSG00000125695.12	RP11-51F16.8	-
chr17	71203492	71232892	-	ENSG00000133193.8	FAM104A	Activated		chr18	45357922	45457515	-	ENSG00000175387.11	SMAD2	-
chr17	71228372	71245091	+	ENSG00000141219.11	C17orf80	-		chr18	45553044	45937123	-	ENSG00000184828.5	ZBTB7C	Repressed
chr17	71244588	71258491	-	ENSG00000187959.5	CPSF4L	-		chr18	45778672	45779208	+	ENSG00000268960.1	AC091150.1	-
chr17	71279763	71308314	-	ENSG00000179604.8	CDC42EP4	-		chr18	46065417	46389588	+	ENSG00000134030.9	CTIF	Activated
chr17	71330523	71640228	-	ENSG00000069188.12	SDK2	Repressed		chr19	15783567	15807984	+	ENSG00000186204.10	CYP4F12	-
chr17	73584139	73622929	+	ENSG00000266714.2	MYO15B	-		chr19	15838834	15839862	+	ENSG00000171942.3	OR10H2	-
chr17	73622925	73663269	-	ENSG00000108469.10	RECQL5	Activated		chr19	15852203	15853153	+	ENSG00000171936.1	OR10H3	-
chr17	73629514	73637484	+	ENSG00000204323.5	SMIM5	-		chr19	15904761	15905892	+	ENSG00000172519.8	OR10H5	-
chr17	73642323	73644057	+	ENSG00000259120.2	SMIM6	-		chr19	15917817	15918936	-	ENSG00000186723.2	OR10H1	-
chr17	73663196	73704142	+	ENSG00000161526.10	SAP30BP	Activated		chr19	15988833	16008930	-	ENSG00000186115.8	CYP4F2	-
chr17	73717408	73753899	+	ENSG00000132470.9	ITGB4	-		chr19	16023177	16045677	-	ENSG00000171903.12	CYP4F11	-
chr17	73747675	73761792	-	ENSG00000108479.7	GALK1	-		chr19	16059818	16060768	+	ENSG00000176231.1	OR10H4	-
chr17	73772515	73781974	-	ENSG00000132475.4	H3F3B	-		chr19	16177831	16213813	+	ENSG00000167460.10	TPM4	Activated
chr17	73780681	73821886	+	ENSG00000132478.5	UNK	-		chr19	16222439	16245044	+	ENSG00000167461.7	RAB8A	-
chr17	73823306	73840798	-	ENSG00000092929.7	UNC13D	Repressed		chr19	16244838	16269386	+	ENSG00000196684.8	HSH2D	Repressed
chr17	73841780	73852588	-	ENSG00000132471.7	WBP2	-		chr19	16272179	16284336	-	ENSG00000141977.5	CIB3	-
chr17	73870242	73874656	-	ENSG00000132481.2	TRIM47	-		chr19	16296191	16302857	+	ENSG00000105058.7	FAM32A	-
chr17	73876416	73893084	-	ENSG00000141569.6	TRIM65	-		chr19	16308389	16346160	+	ENSG00000072958.4	AP1M1	Activated
chr17	73894724	73905899	-	ENSG00000204316.8	MRPL38	-		chr19	16435628	16438685	+	ENSG00000127528.5	KLF2	-
chr17	73894726	73926210	-	ENSG00000267426.1	RP11-552F3.12	-		chr19	16466050	16582896	-	ENSG00000127527.9	EPS15L1	Activated
chr17	73905655	73937221	-	ENSG00000188878.12	FBF1	Activated		chr2	115199876	116603328	+	ENSG00000175497.12	DPP10	-
chr17	73937588	73975515	-	ENSG00000161533.7	ACOX1	-		chr2	127656472	127659673	+	ENSG00000237524.3	TEX51	-
chr17	73975301	73996667	+	ENSG00000257949.2	TEN1	-		chr2	143635067	143799890	+	ENSG00000115919.10	KYNU	-
chr17	73996987	74002080	+	ENSG00000250506.2	CDK3	-		chr2	143848931	144525921	+	ENSG00000075884.8	ARHGAP15	-
chr17	74000583	74023533	-	ENSG00000167880.3	EVPL	-		chr2	144695635	145090135	-	ENSG00000121964.10	GTDC1	Activated
chr17	74035184	74068734	-	ENSG00000167881.10	SRP68	-		chr2	145141648	145282147	-	ENSG00000169554.12	ZEB2	Activated
chr17	74068042	74079747	+	ENSG00000186919.8	ZACN	-		chr2	225629807	225907162	-	ENSG00000135905.14	DOCK10	Activated
chr17	74070875	74073622	+	ENSG00000182687.3	GALR2	-		chr2	226265364	226518734	+	ENSG00000144460.10	NYAP2	-
chr17	74077087	74117657	-	ENSG00000182473.16	EXOC7	-		chr2	231067826	231223762	+	ENSG00000079263.14	SP140	-
chr17	74132414	74137380	-	ENSG00000129654.7	FOXJ1	-		chr2	231191899	231268447	+	ENSG00000185404.12	SP140L	-
chr17	74138534	74236454	-	ENSG00000141576.10	RNF157	-		chr2	231280657	231408805	+	ENSG00000067066.12	SP100	-
chr17	74261283	74267375	+	ENSG00000185262.7	UBALD2	-		chr2	231577560	231685790	+	ENSG00000135932.6	CAB39	Activated
chr17	74270130	74303761	-	ENSG00000129646.9	QRICH2	-		chr2	231729354	231743963	+	ENSG00000135916.11	ITM2C	-
chr17	74305567	74380602	-	ENSG00000161542.12	PRPSAP1	Activated		chr2	231772033	231825781	-	ENSG00000135898.5	GPR55	-
chr17	74372665	74383941	+	ENSG00000176170.9	SPHK1	-		chr2	231860836	231889770	+	ENSG00000173699.11	SPATA3	-
chr17	74385532	74449288	-	ENSG00000175931.8	UBE2O	Activated		chr2	231902205	231914434	+	ENSG00000204128.5	C2orf72	-
chr17	74449433	74466199	+	ENSG00000129673.5	AANAT	-		chr2	231921578	232037541	+	ENSG00000173692.8	PSMD1	Activated
chr17	74466973	74497872	-	ENSG00000129667.8	RHBDF2	Activated		chr2	231972944	231989832	-	ENSG00000135914.5	HTR2B	-
chr17	74523438	74547257	-	ENSG00000161544.5	CYGB	-		chr2	232063260	232239548	+	ENSG00000135931.13	ARMC9	Activated
chr17	74523668	74549660	+	ENSG00000214140.6	PRCD	Activated		chr2	232260254	232265875	+	ENSG00000156966.6	B3GNT7	-
chr17	74559792	74583038	-	ENSG00000070731.5	ST6GALNAC2	-		chr2	232316906	232317864	+	ENSG00000233538.1	AC017104.2	-
chr17	74620843	74639920	-	ENSG00000070526.10	ST6GALNAC1	-		chr2	232318242	232348352	-	ENSG00000115053.11	NCL	Repressed
chr17	74668633	74707098	-	ENSG00000182534.9	MXRA7	-		chr2	232387871	232395206	-	ENSG00000171596.6	NMUR1	-
chr17	74708919	74722866	-	ENSG00000070495.10	JMJD6	-		chr2	232457575	232458994	+	ENSG00000177673.2	TEX44	-
chr17	74722912	74730018	+	ENSG00000181038.9	METTL23	Activated		chr2	232571517	232571621	-	ENSG00000269363.1	MGC4771	-
chr17	74729060	74734604	+	ENSG00000267168.1	RP11-318A15.7	-		chr2	232571605	232578251	+	ENSG00000187514.10	PTMA	-
chr17	74730197	74733456	-	ENSG00000161547.10	SRSF2	-		chr2	232597135	232650982	-	ENSG00000156973.9	PDE6D	-
chr17	74731947	74777531	+	ENSG00000092931.7	MFSD11	-		chr2	232646381	232673963	+	ENSG00000144524.13	COPS7B	-
chr17	74864538	74946475	+	ENSG00000167889.8	MGAT5B	Repressed		chr2	232786530	232791113	-	ENSG00000163273.3	NPPC	-
chr17	75082798	75213179	+	ENSG00000129657.10	SEC14L1	Activated		chr2	232825955	233209060	+	ENSG00000144535.15	DIS3L2	-
chr17	75276651	75496678	+	ENSG00000184640.13	40057	Activated		chr2	233243244	233247599	+	ENSG00000163283.6	ALPP	-
chr17	79910388	79919716	-	ENSG00000185269.7	NOTUM	-		chr2	233271553	233275424	+	ENSG00000163286.3	ALPG	-
chr17	79934683	79975282	+	ENSG00000169696.11	ASPSCR1	Activated		chr2	233320833	233324742	+	ENSG00000163295.4	ALPI	-
chr17	79976578	79981983	-	ENSG00000169689.10	CENPX	-		chr2	233344537	233352538	-	ENSG00000171551.7	ECEL1	-
chr17	79981178	79989027	+	ENSG00000169683.3	LRRC45	-		chr2	233385173	233390422	+	ENSG00000237412.2	PRSS56	Repressed
chr17	79989500	79992080	+	ENSG00000169750.4	RAC3	Activated		chr2	233390703	233401377	+	ENSG00000135902.5	CHRND	Repressed
chr17	79993012	79995608	-	ENSG00000169738.3	DCXR	Activated		chr2	233404437	233411113	+	ENSG00000196811.7	CHRNG	-
chr17	80005778	80009707	-	ENSG00000169733.7	RFNG	-		chr2	233412779	233415226	-	ENSG00000221944.3	TIGD1	Activated
chr17	80008567	80015346	+	ENSG00000169727.8	GPS1	Activated		chr2	233414762	233448354	+	ENSG00000135930.9	EIF4E2	-
chr17	80015382	80023763	-	ENSG00000169718.13	DUS1L	Activated		chr2	233470767	233547491	+	ENSG00000115468.7	EFHD1	-
chr17	80036214	80056208	-	ENSG00000169710.6	FASN	-		chr2	233562009	233725285	+	ENSG00000204120.10	GIGYF2	-
chr17	80059336	80170706	-	ENSG00000176155.14	CCDC57	Activated		chr2	233631174	233641278	-	ENSG00000115474.6	KCNJ13	-
chr17	80186273	80219005	+	ENSG00000141526.10	SLC16A3	Activated		chr2	233721980	233743418	+	ENSG00000182600.5	SNORC	-
chr17	80196899	80231607	-	ENSG00000141551.10	CSNK1D	Activated		chr2	233743396	233877982	-	ENSG00000066248.10	NGEF	Repressed
chr17	80214131	80216080	+	ENSG00000268852.1	AC132872.2	-		chr2	233877324	233880595	+	ENSG00000222001.2	AC106876.2	-
chr17	80272744	80275478	-	ENSG00000173762.3	CD7	-		chr2	233897382	233899767	+	ENSG00000115488.3	NEU2	-
chr17	80278900	80291950	-	ENSG00000141574.3	SECTM1	Activated		chr2	233924677	234116549	+	ENSG00000168918.9	INPP5D	-
chr17	80317123	80321652	+	ENSG00000182459.4	TEX19	-		chr2	234118697	234204320	+	ENSG00000085978.17	ATG16L1	Activated
chr17	80332153	80333462	+	ENSG00000181408.2	UTS2R	Repressed		chr2	234216462	234255701	+	ENSG00000130561.12	SAG	-
chr17	80347099	80376513	-	ENSG00000181396.8	OGFOD3	Activated		chr2	234263153	234380750	+	ENSG00000077044.5	DGKD	-
chr17	80376194	80400521	+	ENSG00000169660.11	HEXD	Activated		chr2	234384166	234475428	-	ENSG00000085982.9	USP40	Activated
chr17	80400465	80408705	-	ENSG00000178927.12	CYBC1	-		chr2	234526291	234681956	+	ENSG00000241635.3	UGT1A1	-
chr17	80416056	80448413	+	ENSG00000141562.13	NARF	Activated		chr2	234545100	234681951	+	ENSG00000242515.1	UGT1A10	-
chr17	80477589	80602538	+	ENSG00000141568.15	FOXK2	Activated		chr2	234580499	234681946	+	ENSG00000241119.1	UGT1A9	-
chr17	80572438	80606429	-	ENSG00000141580.11	WDR45B	Activated		chr2	234590584	234681945	+	ENSG00000244122.2	UGT1A7	-
chr17	80612849	80656604	-	ENSG00000141542.6	RAB40B	-		chr2	234600253	234681946	+	ENSG00000167165.14	UGT1A6	-
chr17	80674559	80688204	+	ENSG00000141560.10	FN3KRP	-		chr2	234621638	234681945	+	ENSG00000240224.1	UGT1A5	-
chr17	80693451	80709073	+	ENSG00000167363.9	FN3K	-		chr2	234627424	234681945	+	ENSG00000244474.1	UGT1A4	-
chr17	80709940	80900724	+	ENSG00000141556.16	TBCD	Activated		chr2	234637754	234681945	+	ENSG00000243135.1	UGT1A3	-
chr17	80787311	80798454	-	ENSG00000141579.6	ZNF750	-		chr2	234668894	234681945	+	ENSG00000242366.2	UGT1A8	-
chr17	80900031	81009686	-	ENSG00000175711.4	B3GNTL1	Activated		chr2	234684370	234742069	+	ENSG00000185038.10	MROH2A	Repressed
chr17	81037567	81052864	+	ENSG00000176845.8	METRNL	-		chr2	234742062	234763212	-	ENSG00000123485.7	HJURP	-
chr18	47225	73545	-	ENSG00000173213.7	TUBB8P12	-		chr2	234826043	234928166	+	ENSG00000144481.12	TRPM8	Repressed
chr18	158383	214629	+	ENSG00000101557.10	USP14	Activated		chr2	234959323	234985778	+	ENSG00000072080.6	SPP2	-
chr18	214520	268050	-	ENSG00000079134.7	THOC1	-		chr2	235401685	235405697	-	ENSG00000188042.5	ARL4C	-
chr18	319361	500722	-	ENSG00000158270.10	COLEC12	Repressed		chr20	51588946	52111869	+	ENSG00000182463.11	TSHZ2	-
chr18	580367	581524	+	ENSG00000177143.3	CETN1	-		chr20	52105495	52106164	+	ENSG00000227164.2	AL354993.1	-
chr18	596988	650334	+	ENSG00000079101.12	CLUL1	-		chr20	52183604	52226446	-	ENSG00000171940.9	ZNF217	-
chr18	641320	658340	-	ENSG00000176912.3	TYMSOS	-		chr20	52553316	52687304	-	ENSG00000064787.8	BCAS1	Repressed
chr18	657604	673578	+	ENSG00000176890.11	TYMS	-		chr20	52769988	52790512	-	ENSG00000019186.5	CYP24A1	-
chr18	670324	712676	-	ENSG00000132199.14	ENOSF1	Activated		chr20	52824386	52844591	+	ENSG00000101132.5	PFDN4	-
chr18	721588	812547	-	ENSG00000176105.9	YES1	Activated		chr21	27252861	27543446	-	ENSG00000142192.16	APP	-
chr18	904944	912173	+	ENSG00000141433.8	ADCYAP1	-		chr21	27838528	27945603	-	ENSG00000166265.7	CYYR1	-
chr18	2537524	2571508	-	ENSG00000101574.10	METTL4	-		chr21	28208066	28217728	-	ENSG00000154734.10	ADAMTS1	-
chr18	2571510	2616634	+	ENSG00000080986.8	NDC80	Activated		chr21	28290231	28338832	-	ENSG00000154736.5	ADAMTS5	Activated
chr18	2655737	2805015	+	ENSG00000101596.10	SMCHD1	-		chr21	37832919	37948867	-	ENSG00000159261.6	CLDN14	Repressed
chr18	2847028	2915991	+	ENSG00000132205.6	EMILIN2	Repressed		chr21	37858165	37860058	+	ENSG00000267976.1	AP000695.1	-
chr18	2916992	3013313	-	ENSG00000101577.5	LPIN2	Activated		chr21	38071433	38122218	+	ENSG00000159263.11	SIM2	Repressed
chr18	3066805	3220106	-	ENSG00000101605.8	MYOM1	-		chr21	38123189	38362536	-	ENSG00000159267.10	HLCS	Activated
chr18	3247479	3256234	+	ENSG00000101608.8	MYL12A	-		chr21	38378450	38391959	+	ENSG00000183145.4	RIPPLY3	-
chr18	3261907	3278282	+	ENSG00000118680.8	MYL12B	-		chr21	38431470	38445470	-	ENSG00000185808.9	PIGP	Activated
chr18	3411606	3458409	+	ENSG00000177426.16	TGIF1	-		chr21	38445526	38575413	+	ENSG00000182670.9	TTC3	-
chr18	3496030	4455335	-	ENSG00000170579.10	DLGAP1	-		chr21	38595721	38640262	-	ENSG00000157538.9	VPS26C	-
chr18	5145284	5197502	-	ENSG00000231824.3	AKAIN1	-		chr21	38738092	38889753	+	ENSG00000157540.15	DYRK1A	Activated
chr18	5289018	5297052	-	ENSG00000198081.6	ZBTB14	-		chr21	38888740	38888973	+	ENSG00000267937.1	AP001421.1	-
chr18	5392383	5630699	-	ENSG00000082397.11	EPB41L3	-		chr21	38979678	39288749	-	ENSG00000157542.8	KCNJ6	Activated
chr18	5882071	5895954	-	ENSG00000206432.4	TMEM200C	-		chr3	9022275	9404737	-	ENSG00000196220.11	SRGAP3	Repressed
chr18	5954705	6415236	-	ENSG00000154655.10	L3MBTL4	-		chr3	9944296	9958086	+	ENSG00000163701.14	IL17RE	-
chr18	6511415	6590652	+	ENSG00000265944.1	LINC01387	-		chr3	9958758	9975314	+	ENSG00000163702.14	IL17RC	-
chr18	6729717	6915715	+	ENSG00000088756.8	ARHGAP28	-		chr3	9975506	9987097	+	ENSG00000163703.13	CRELD1	-
chr18	6941743	7117813	-	ENSG00000101680.9	LAMA1	Activated		chr3	9987226	9994078	-	ENSG00000163704.7	PRRT3	Activated
chr18	7231123	7232045	+	ENSG00000206422.2	LRRC30	-		chr3	10004221	10052800	-	ENSG00000125037.8	EMC3	Activated
chr18	7566780	8406859	+	ENSG00000173482.12	PTPRM	-		chr3	10068098	10143614	+	ENSG00000144554.6	FANCD2	-
chr18	8336437	8337038	-	ENSG00000268046.1	AP001094.1	-		chr3	10123001	10149915	-	ENSG00000163705.8	FANCD2OS	-
chr18	8609443	8639379	+	ENSG00000206418.3	RAB12	Activated		chr3	10157276	10168874	+	ENSG00000254999.2	BRK1	-
chr18	8705659	8832776	+	ENSG00000168502.13	MTCL1	-		chr3	10182692	10193904	+	ENSG00000134086.7	VHL	-
chr18	9102628	9134343	+	ENSG00000178127.8	NDUFV2	Activated		chr3	10206549	10285427	+	ENSG00000134070.4	IRAK2	Activated
chr18	9136226	9285983	+	ENSG00000101745.11	ANKRD12	-		chr3	10289707	10322902	+	ENSG00000157014.6	TATDN2	Activated
chr18	9334765	9402418	+	ENSG00000128791.7	TWSG1	-		chr3	10291056	10327480	+	ENSG00000272410.1	RP11-438J1.1	-
chr18	9475007	9538114	+	ENSG00000017797.7	RALBP1	Activated		chr3	10327359	10334631	-	ENSG00000157017.11	GHRL	-
chr18	9546789	9615238	-	ENSG00000154845.11	PPP4R1	Activated		chr3	10334815	10362862	-	ENSG00000157020.13	SEC13	Activated
chr18	9708162	9862548	+	ENSG00000168461.8	RAB31	Activated		chr3	10365707	10749716	-	ENSG00000157087.12	ATP2B2	Repressed
chr18	9885763	9889272	+	ENSG00000168454.10	TXNDC2	-		chr3	10857885	10982419	+	ENSG00000132164.5	SLC6A11	-
chr18	9913999	9960018	+	ENSG00000101558.9	VAPA	Activated		chr3	11034410	11080933	+	ENSG00000157103.6	SLC6A1	-
chr18	10454625	10489945	+	ENSG00000154856.8	APCDD1	-		chr3	11178779	11305243	+	ENSG00000196639.6	HRH1	Activated
chr18	10525902	10552758	+	ENSG00000134265.8	NAPG	Activated		chr3	11313995	11599139	+	ENSG00000197548.8	ATG7	Activated
chr18	10666480	11148587	-	ENSG00000154864.7	PIEZO2	Repressed		chr3	31574130	31679112	+	ENSG00000163527.5	STT3B	-
chr18	28569974	28622781	-	ENSG00000134762.12	DSC3	-		chr3	31699382	32119072	-	ENSG00000144645.9	OSBPL10	Activated
chr18	28645940	28682378	-	ENSG00000134755.10	DSC2	-		chr3	32023263	32033120	+	ENSG00000197385.5	ZNF860	-
chr18	28709199	28742819	-	ENSG00000134765.5	DSC1	-		chr3	32147181	32210205	+	ENSG00000152642.6	GPD1L	-
chr18	28898052	28936992	+	ENSG00000134760.5	DSG1	-		chr3	32280171	32411817	+	ENSG00000170293.4	CMTM8	-
chr18	28956740	28994875	+	ENSG00000175065.7	DSG4	-		chr3	32433163	32524559	+	ENSG00000153551.9	CMTM7	-
chr18	29027758	29058665	+	ENSG00000134757.4	DSG3	-		chr3	52002526	52017425	-	ENSG00000114779.15	ABHD14B	-
chr18	29078006	29128971	+	ENSG00000046604.8	DSG2	-		chr3	52009066	52023199	+	ENSG00000114786.11	ABHD14A-ACY1	-
chr18	29171689	29178974	+	ENSG00000118271.5	TTR	-		chr3	52009066	52023213	+	ENSG00000243989.3	ACY1	-
chr18	29202210	29265799	-	ENSG00000118276.7	B4GALT6	-		chr3	52027616	52029958	-	ENSG00000162244.6	RPL29	-
chr18	29339525	29340843	-	ENSG00000141437.7	SLC25A52	-		chr3	52082935	52090566	-	ENSG00000164086.8	DUSP7	Activated
chr18	29409136	29533099	-	ENSG00000153339.9	TRAPPC8	Activated		chr3	52097076	52097567	-	ENSG00000256097.1	LINC00696	-
chr18	33877677	34360018	+	ENSG00000134775.11	FHOD3	-		chr3	52109269	52188706	-	ENSG00000164087.3	POC1A	Activated
chr18	70818476	70931715	-	ENSG00000263711.1	RP11-169F17.1	-		chr3	52232102	52248343	+	ENSG00000023330.10	ALAS1	-
chr19	107471	111696	+	ENSG00000176695.5	OR4F17	-		chr3	52255096	52273183	-	ENSG00000239732.2	TLR9	Repressed
chr19	281040	291393	-	ENSG00000141934.5	PLPP2	-		chr3	52255097	52265206	-	ENSG00000173366.11	TLR9	Repressed
chr19	305575	344798	-	ENSG00000105556.6	MIER2	Activated		chr3	52262626	52273276	-	ENSG00000247596.4	TWF2	-
chr19	361750	376013	-	ENSG00000105549.6	THEG	Repressed		chr3	52279841	52284613	+	ENSG00000164088.13	PPM1M	-
chr19	405438	409139	-	ENSG00000183186.6	C2CD4C	-		chr3	52288437	52322036	-	ENSG00000164091.7	WDR82	Activated
chr19	416583	460996	-	ENSG00000129946.6	SHC2	Repressed		chr3	52321105	52329272	+	ENSG00000168237.13	GLYCTK	-
chr19	463346	474983	-	ENSG00000181781.5	ODF3L2	-		chr3	52350335	52434507	+	ENSG00000114841.13	DNAH1	Repressed
chr19	489176	505347	+	ENSG00000099866.10	MADCAM1	-		chr3	52435029	52444366	-	ENSG00000163930.5	BAP1	-
chr19	507299	519654	+	ENSG00000141933.8	TPGS1	-		chr3	52444673	52457657	+	ENSG00000010318.15	PHF7	-
chr19	531714	542097	+	ENSG00000099804.4	CDC34	Activated		chr3	52467069	52479101	-	ENSG00000010319.2	SEMA3G	-
chr19	544034	549919	+	ENSG00000197540.3	GZMM	-		chr3	52485118	52488086	-	ENSG00000114854.3	TNNC1	-
chr19	571297	583493	+	ENSG00000172270.14	BSG	Activated		chr3	52489134	52527087	+	ENSG00000010322.11	NISCH	Activated
chr19	589893	617159	+	ENSG00000099822.2	HCN2	Repressed		chr3	52529354	52558511	+	ENSG00000010327.6	STAB1	Repressed
chr19	617223	633597	-	ENSG00000099821.9	POLRMT	-		chr3	52558386	52569070	-	ENSG00000168268.6	NT5DC2	Activated
chr19	639879	643703	+	ENSG00000070388.7	FGF22	-		chr3	52568029	52613253	+	ENSG00000168273.3	SMIM4	Activated
chr19	647526	663277	-	ENSG00000070423.13	RNF126	Activated		chr3	52579368	52719933	-	ENSG00000163939.14	PBRM1	Activated
chr19	676392	683385	+	ENSG00000070404.5	FSTL3	-		chr3	52715172	52728508	+	ENSG00000163938.12	GNL3	-
chr19	685521	695460	-	ENSG00000185198.7	PRSS57	-		chr3	52728505	52740048	-	ENSG00000016864.12	GLT8D1	-
chr19	708953	748329	+	ENSG00000099864.13	PALM	-		chr3	52738971	52742182	+	ENSG00000114902.9	SPCS1	-
chr19	751126	764319	+	ENSG00000099812.6	MISP	-		chr3	52744800	52804965	-	ENSG00000114904.8	NEK4	-
chr19	797075	812327	+	ENSG00000011304.12	PTBP1	-		chr3	52811603	52826078	+	ENSG00000055957.6	ITIH1	-
chr19	812518	821967	-	ENSG00000129951.14	PLPPR3	Activated		chr3	52828784	52843025	+	ENSG00000162267.8	ITIH3	-
chr19	825097	832017	+	ENSG00000172232.5	AZU1	-		chr3	52846991	52865495	-	ENSG00000055955.11	ITIH4	Repressed
chr19	840963	848175	+	ENSG00000196415.5	PRTN3	-		chr3	52847298	52869745	-	ENSG00000243696.4	RP5-966M1.6	Repressed
chr19	851014	856242	+	ENSG00000197561.2	ELANE	Repressed		chr3	52867130	52869235	-	ENSG00000272573.1	MUSTN1	-
chr19	859453	863453	+	ENSG00000197766.3	CFD	Activated		chr3	52867137	52931578	-	ENSG00000248592.3	TMEM110-MUSTN1	-
chr19	867962	893218	-	ENSG00000175221.10	MED16	Activated		chr3	52870235	52931612	-	ENSG00000213533.7	STIMATE	-
chr19	896503	913240	-	ENSG00000198858.5	R3HDM4	-		chr3	52937588	53080766	-	ENSG00000163935.9	SFMBT1	-
chr19	917287	921015	+	ENSG00000116014.5	KISS1R	-		chr3	53003135	53133469	-	ENSG00000272305.1	RP11-894J14.5	-
chr19	925781	975939	+	ENSG00000116017.6	ARID3A	Activated		chr3	53122499	53164478	-	ENSG00000163933.5	RFT1	-
chr19	983174	994569	+	ENSG00000065268.6	WDR18	-		chr3	53190025	53226733	+	ENSG00000163932.9	PRKCD	Activated
chr19	999601	999952	+	ENSG00000269169.1	AC004528.1	-		chr3	53258723	53290068	-	ENSG00000163931.11	TKT	-
chr19	1000418	1009731	+	ENSG00000116032.5	GRIN3B	Activated		chr3	53317447	53381654	-	ENSG00000162290.12	DCP1A	Activated
chr19	1009647	1021117	-	ENSG00000182087.8	TMEM259	Activated		chr3	54156574	55108584	+	ENSG00000157445.10	CACNA2D3	-
chr19	1026298	1039068	+	ENSG00000064666.10	CNN2	-		chr3	54952264	55001115	-	ENSG00000144771.7	LRTM1	-
chr19	1040102	1065571	+	ENSG00000064687.8	ABCA7	-		chr3	55499743	55523973	-	ENSG00000114251.9	WNT5A	Activated
chr19	1065922	1086627	+	ENSG00000180448.6	ARHGAP45	-		chr3	55542336	56502391	-	ENSG00000187672.8	ERC2	Repressed
chr19	1086594	1095598	-	ENSG00000099817.7	POLR2E	Activated		chr3	122399465	122449687	+	ENSG00000173193.9	PARP14	-
chr19	1103936	1106787	+	ENSG00000167468.12	GPX4	-		chr3	122458846	122512671	-	ENSG00000169087.6	HSPBAP1	-
chr19	1107636	1174282	-	ENSG00000064932.11	SBNO2	Activated		chr3	122513642	122599986	+	ENSG00000138463.8	DIRC2	-
chr19	1189406	1228428	+	ENSG00000118046.10	STK11	-		chr3	122628041	122747452	-	ENSG00000082684.10	SEMA5B	Repressed
chr19	1228286	1238026	-	ENSG00000099625.8	CBARP	-		chr3	122785909	122944074	+	ENSG00000065485.13	PDIA5	Activated
chr19	1241749	1244824	+	ENSG00000099624.3	ATP5F1D	-		chr3	122920774	122992977	+	ENSG00000121542.7	SEC22A	-
chr19	1248552	1259142	+	ENSG00000167470.8	MIDN	-		chr3	123001143	123168605	-	ENSG00000173175.10	ADCY5	-
chr19	1259384	1274879	+	ENSG00000099622.9	CIRBP	-		chr3	123209667	123304032	-	ENSG00000206527.5	HACD2	-
chr19	1275026	1279248	+	ENSG00000228300.9	C19orf24	-		chr3	150803484	151154860	+	ENSG00000144893.8	MED12L	-
chr19	1285890	1378430	+	ENSG00000160953.10	MUM1	-		chr3	150929905	150996255	-	ENSG00000174944.4	P2RY14	-
chr19	1286153	1301430	+	ENSG00000099617.2	EFNA2	-		chr3	156977531	157251408	-	ENSG00000197415.7	VEPH1	Activated
chr19	1383526	1395583	+	ENSG00000115286.15	NDUFS7	Activated		chr3	157154578	157161417	+	ENSG00000163661.3	PTX3	-
chr19	1397091	1401569	-	ENSG00000130005.7	GAMT	-		chr3	157261035	157395538	+	ENSG00000174899.6	PQLC2L	-
chr19	1407568	1435719	+	ENSG00000071626.12	DAZAP1	Activated		chr3	169755717	169803191	+	ENSG00000173890.12	GPR160	-
chr19	1438358	1440583	+	ENSG00000115268.5	RPS15	-		chr3	169804520	169899537	-	ENSG00000173889.11	PHC3	-
chr19	1440838	1441937	+	ENSG00000268798.1	AC027307.3	-		chr3	169940153	170023769	+	ENSG00000163558.8	PRKCI	-
chr19	1446300	1473243	+	ENSG00000115266.7	APC2	-		chr3	170075466	170114623	+	ENSG00000136603.9	SKIL	Activated
chr19	1461142	1479555	-	ENSG00000119559.11	C19orf25	Activated		chr3	170136653	170578169	+	ENSG00000013297.6	CLDN11	-
chr19	1481427	1490751	-	ENSG00000115257.11	PCSK4	-		chr3	170177372	170303863	-	ENSG00000013293.5	SLC7A14	-
chr19	1491165	1497926	+	ENSG00000115255.6	REEP6	-		chr3	195924320	195938308	-	ENSG00000163958.9	ZDHHC19	-
chr19	1505017	1513603	-	ENSG00000185761.6	ADAMTSL5	-		chr3	195938358	195970049	+	ENSG00000163959.5	SLC51A	-
chr19	1524073	1535455	+	ENSG00000185988.7	PLK5	-		chr3	195941093	196014828	-	ENSG00000161217.7	PCYT1A	-
chr19	1554668	1568057	-	ENSG00000181588.15	MEX3D	-		chr3	195975101	196045093	-	ENSG00000272741.1	RP11-447L10.1	-
chr19	1576639	1592882	-	ENSG00000071655.13	MBD3	-		chr3	196018090	196045170	-	ENSG00000213123.6	TCTEX1D2	-
chr19	1578338	1605444	-	ENSG00000267059.2	UQCR11	-		chr3	196042953	196065244	-	ENSG00000273331.1	TM4SF19-TCTEX1D2	-
chr19	1597171	1605480	-	ENSG00000127540.7	UQCR11	-		chr3	196046213	196065374	-	ENSG00000145107.11	TM4SF19	-
chr19	1609291	1652604	-	ENSG00000071564.10	TCF3	-		chr3	196074533	196159345	-	ENSG00000163960.7	UBXN7	-
chr19	1752372	1780987	+	ENSG00000205922.4	ONECUT3	-		chr3	196195654	196230639	-	ENSG00000163961.4	RNF168	-
chr19	1782074	1812275	-	ENSG00000130270.12	ATP8B3	-		chr3	196233748	196242237	-	ENSG00000214097.4	SMCO1	-
chr19	1815248	1848452	-	ENSG00000079313.7	REXO1	Activated		chr3	196281056	196295545	-	ENSG00000185798.6	WDR53	-
chr19	1852399	1863567	-	ENSG00000129911.4	KLF16	-		chr3	196295482	196315930	+	ENSG00000174013.7	FBXO45	-
chr19	1876809	1885546	-	ENSG00000129968.11	ABHD17A	Activated		chr3	196366557	196388875	+	ENSG00000174004.5	NRROS	-
chr19	1905213	1926016	+	ENSG00000227500.5	SCAMP4	-		chr3	196366646	196462878	+	ENSG00000163964.9	PIGX	-
chr19	1905377	1913444	+	ENSG00000213638.4	ADAT3	-		chr3	196433148	196439164	-	ENSG00000174007.7	CEP19	-
chr19	1941188	1981337	+	ENSG00000133275.11	CSNK1G2	-		chr3	196466728	196559518	+	ENSG00000180370.6	PAK2	-
chr19	1985447	2034880	-	ENSG00000133243.4	BTBD2	-		chr4	53179	88099	+	ENSG00000197701.7	ZNF595	-
chr19	2037470	2051243	-	ENSG00000099875.10	MKNK2	-		chr4	264464	299110	-	ENSG00000186777.7	ZNF732	-
chr19	2071037	2096672	-	ENSG00000172081.9	MOB3A	Activated		chr4	331603	378653	+	ENSG00000131127.9	ZNF141	-
chr19	2096380	2099592	+	ENSG00000099840.9	IZUMO4	-		chr4	419604	492945	-	ENSG00000182903.11	ZNF721	Activated
chr19	2100988	2164464	-	ENSG00000065000.11	AP3D1	Activated		chr4	492989	533985	+	ENSG00000174227.11	PIGG	-
chr19	2164148	2232577	+	ENSG00000104885.13	DOT1L	Activated		chr4	619373	664571	+	ENSG00000133256.8	PDE6B	-
chr19	2230002	2237703	-	ENSG00000104886.5	PLEKHJ1	-		chr4	666225	668127	-	ENSG00000169020.5	ATP5ME	-
chr19	2236520	2248678	+	ENSG00000104897.5	SF3A2	Activated		chr4	667369	675822	+	ENSG00000215375.2	MYL5	-
chr19	2249308	2252072	+	ENSG00000104899.4	AMH	Repressed		chr4	675618	683230	-	ENSG00000169026.8	SLC49A3	Activated
chr19	2252251	2269758	-	ENSG00000167476.6	JSRP1	Activated		chr4	699537	764428	+	ENSG00000185619.13	PCGF3	Activated
chr19	2269485	2273487	+	ENSG00000104904.8	OAZ1	-		chr4	778745	819986	-	ENSG00000168993.10	CPLX1	-
chr19	2274631	2282181	-	ENSG00000188305.4	PEAK3	Activated		chr4	843064	926161	-	ENSG00000178950.12	GAK	-
chr19	2289774	2308156	-	ENSG00000220008.2	LINGO3	-		chr4	926175	952444	+	ENSG00000127419.12	TMEM175	-
chr19	2321516	2328619	-	ENSG00000130332.10	LSM7	-		chr4	952675	980683	-	ENSG00000145214.9	DGKQ	Activated in MB,Repressed in MT
chr19	2389769	2426237	+	ENSG00000178297.8	TMPRSS9	-		chr4	972861	987228	-	ENSG00000145217.9	SLC26A1	Activated in MB,Repressed in MT
chr19	2425622	2427892	-	ENSG00000099800.3	TIMM13	-		chr4	980785	998316	+	ENSG00000127415.8	IDUA	-
chr19	2427636	2456994	-	ENSG00000176619.6	LMNB2	Activated		chr4	1003724	1020685	+	ENSG00000127418.10	FGFRL1	-
chr19	2476120	2478257	+	ENSG00000099860.4	GADD45B	-		chr4	1050038	1107350	-	ENSG00000178222.8	RNF212	-
chr19	2511217	2702707	-	ENSG00000176533.8	GNG7	Repressed		chr4	1160720	1202750	-	ENSG00000159674.7	SPON2	Activated
chr19	2714565	2721416	-	ENSG00000176490.4	DIRAS1	Repressed		chr4	1205236	1243741	-	ENSG00000159692.11	CTBP1	Activated
chr19	2717767	2740046	-	ENSG00000267001.1	AC006538.4	-		chr4	1283639	1333935	+	ENSG00000090316.11	MAEA	Activated
chr19	2732202	2740150	-	ENSG00000141873.6	SLC39A3	-		chr4	1341054	1381837	+	ENSG00000163945.11	UVSSA	Activated
chr19	2754712	2783369	-	ENSG00000104969.5	SGTA	Activated		chr4	1385340	1389780	+	ENSG00000179979.7	CRIPAK	-
chr19	2785458	2813599	+	ENSG00000172009.10	THOP1	-		chr4	1396720	1400119	-	ENSG00000235608.1	NKX1-1	-
chr19	2819872	2835771	+	ENSG00000172006.7	ZNF554	-		chr4	1619642	1686029	-	ENSG00000174137.8	FAM53A	-
chr19	2841433	2860482	+	ENSG00000186300.7	ZNF555	Activated		chr4	1694527	1714282	-	ENSG00000163950.8	SLBP	-
chr19	2867333	2878515	+	ENSG00000172000.3	ZNF556	-		chr4	1717679	1723085	-	ENSG00000168936.6	TMEM129	-
chr19	2900896	2918474	+	ENSG00000171970.8	ZNF57	-		chr4	1723227	1746898	+	ENSG00000013810.14	TACC3	-
chr19	2933216	2944969	-	ENSG00000175691.8	ZNF77	Activated		chr4	1795034	1810599	+	ENSG00000068078.13	FGFR3	Repressed
chr19	2977444	2995177	+	ENSG00000104953.14	TLE6	Repressed		chr4	1813206	1857974	-	ENSG00000168924.10	LETM1	Activated
chr19	2997636	3047633	-	ENSG00000065717.10	TLE2	-		chr4	1873151	1983934	+	ENSG00000109685.13	NSD2	Activated
chr19	3052908	3063105	-	ENSG00000104964.10	AES	-		chr4	1984441	2043630	-	ENSG00000185049.8	NELFA	Repressed
chr19	3094408	3124002	+	ENSG00000088256.4	GNA11	-		chr4	2043689	2045697	+	ENSG00000243449.2	C4orf48	-
chr19	3136191	3163767	+	ENSG00000060558.3	GNA15	-		chr4	2061239	2070816	+	ENSG00000185818.7	NAT8L	-
chr19	3172344	3180329	+	ENSG00000125910.4	S1PR4	Activated in MB, Repressed in MT		chr4	2073645	2243848	-	ENSG00000130997.12	POLN	-
chr19	3185561	3209573	+	ENSG00000125912.6	NCLN	Activated		chr4	2229191	2243891	-	ENSG00000214367.3	HAUS3	-
chr19	3224701	3297074	+	ENSG00000161082.8	CELF5	-		chr4	2249159	2264021	-	ENSG00000123933.10	MXD4	Activated
chr19	3359561	3469215	+	ENSG00000141905.13	NFIC	Activated		chr4	2271309	2420390	-	ENSG00000159733.9	ZFYVE28	Repressed
chr19	3474405	3480540	-	ENSG00000095932.5	SMIM24	-		chr4	2451700	2464668	+	ENSG00000249428.1	RP11-503N18.3	-
chr19	3490819	3500938	-	ENSG00000129932.3	DOHH	-		chr4	2463947	2627047	+	ENSG00000063978.11	RNF4	Activated
chr19	3506271	3538328	+	ENSG00000105325.9	FZR1	Activated		chr4	128802016	128820350	+	ENSG00000142731.6	PLK4	-
chr19	3538259	3574288	-	ENSG00000161091.8	MFSD12	-		chr4	128838960	128887150	-	ENSG00000164073.5	MFSD8	-
chr19	3539152	3544028	+	ENSG00000183397.5	C19orf71	-		chr4	128886461	128960866	+	ENSG00000164074.10	ABHD18	-
chr19	3572775	3579086	+	ENSG00000064961.14	HMG20B	-		chr4	128982423	129144086	+	ENSG00000138709.13	LARP1B	-
chr19	3585551	3593539	+	ENSG00000179855.5	GIPC3	-		chr4	129190397	129209984	-	ENSG00000164040.12	PGRMC2	Activated
chr19	3594504	3606838	-	ENSG00000006638.7	TBXA2R	-		chr4	129730779	129796379	+	ENSG00000077684.11	JADE1	Activated
chr19	3610639	3626813	-	ENSG00000105298.9	CACTIN	Activated		chr4	129786076	130014764	-	ENSG00000151466.7	SCLT1	-
chr19	3630181	3700477	-	ENSG00000186111.4	PIP5K1C	Activated		chr4	130014472	130037795	+	ENSG00000151470.8	C4orf33	-
chr19	3708107	3750811	+	ENSG00000105289.10	TJP3	-		chr5	10226442	10250009	-	ENSG00000150756.9	FAM173B	-
chr19	3750817	3761697	-	ENSG00000011132.7	APBA3	Activated		chr5	10250033	10266524	+	ENSG00000150753.7	CCT5	-
chr19	3762662	3768573	+	ENSG00000183617.4	MRPL54	-		chr5	10275987	10308138	-	ENSG00000164237.4	CMBL	-
chr19	3769087	3772233	-	ENSG00000173976.11	RAX2	Repressed		chr5	10353815	10440500	+	ENSG00000145495.10	2006-03-01	Activated
chr19	3777971	3802127	-	ENSG00000007264.9	MATK	-		chr5	10441636	10472141	+	ENSG00000145491.7	ROPN1L	-
chr19	3804022	3869030	-	ENSG00000105278.6	ZFR2	-		chr5	10505108	10522196	-	ENSG00000249160.1	LINC02213	Repressed
chr19	3879862	3928077	+	ENSG00000167654.13	ATCAY	-		chr5	10564442	10650308	+	ENSG00000164236.7	ANKRD33B	Repressed
chr19	3933101	3942414	+	ENSG00000077009.9	NMRK2	Repressed		chr5	10679342	10761384	-	ENSG00000112977.11	DAP	-
chr19	3958451	3971121	-	ENSG00000167657.7	DAPK3	-		chr5	10971952	11904155	-	ENSG00000169862.14	CTNND2	-
chr19	3976054	3985467	-	ENSG00000167658.11	EEF2	-		chr5	140710252	140892546	+	ENSG00000204956.4	PCDHGA1	Activated in MT, Repressed in MB
chr19	4007644	4039384	+	ENSG00000105229.2	PIAS4	Activated		chr5	140718539	140892546	+	ENSG00000081853.13	PCDHGA2	Repressed
chr19	4041127	4043154	-	ENSG00000205147.3	AC016586.1	-		chr5	140723601	140892546	+	ENSG00000254245.1	PCDHGA3	-
chr19	4044362	4066943	-	ENSG00000178951.4	ZBTB7A	Activated		chr5	140729828	140892546	+	ENSG00000254221.1	PCDHGB1	-
chr19	4090319	4124126	-	ENSG00000126934.9	MAP2K2	Activated		chr5	140734768	140892546	+	ENSG00000262576.1	PCDHGA4	-
chr19	4153598	4173051	+	ENSG00000060566.9	CREB3L3	-		chr5	140739703	140892546	+	ENSG00000253910.1	PCDHGB2	-
chr19	4174106	4182601	-	ENSG00000077463.10	SIRT6	Activated		chr5	140743898	140892546	+	ENSG00000253485.1	PCDHGA5	-
chr19	4183351	4224811	+	ENSG00000089847.8	ANKRD24	-		chr5	140749831	140892546	+	ENSG00000262209.1	PCDHGB3	-
chr19	4229495	4237528	+	ENSG00000105246.5	EBI3	-		chr5	140753651	140892546	+	ENSG00000253731.1	PCDHGA6	-
chr19	4247076	4269087	+	ENSG00000105248.11	YJU2	-		chr5	140762467	140892546	+	ENSG00000253537.1	PCDHGA7	-
chr19	4278598	4290721	+	ENSG00000105251.6	SHD	Repressed		chr5	140767452	140892546	+	ENSG00000253953.1	PCDHGB4	-
chr19	4292229	4302428	-	ENSG00000167664.4	TMIGD2	Repressed		chr5	140772381	140892546	+	ENSG00000253767.1	PCDHGA8	-
chr19	4304597	4323840	+	ENSG00000105255.6	FSD1	-		chr5	140782520	140892546	+	ENSG00000261934.1	PCDHGA9	-
chr19	4324040	4342783	-	ENSG00000178078.7	STAP2	-		chr5	140787770	140892546	+	ENSG00000253305.1	PCDHGB6	-
chr19	4343524	4360083	+	ENSG00000008382.11	MPND	-		chr5	140792743	140892546	+	ENSG00000253846.1	PCDHGA10	-
chr19	4360367	4400544	-	ENSG00000141985.5	SH3GL1	-		chr5	140797427	140892546	+	ENSG00000254122.1	PCDHGB7	-
chr19	4402659	4445015	+	ENSG00000167670.11	CHAF1A	-		chr5	140800762	140891835	+	ENSG00000253873.1	PCDHGA11	-
chr19	4444996	4457819	-	ENSG00000167671.7	UBXN6	-		chr5	140810185	140892546	+	ENSG00000253159.1	PCDHGA12	-
chr19	4472284	4502223	+	ENSG00000167674.10	HDGFL2	Activated		chr5	140855580	140892542	+	ENSG00000240184.2	PCDHGC3	-
chr19	4502204	4517716	-	ENSG00000167676.3	PLIN4	-		chr5	140864741	140892546	+	ENSG00000242419.1	PCDHGC4	Activated
chr19	4522543	4535236	-	ENSG00000214456.4	PLIN5	-		chr5	140868808	140892546	+	ENSG00000240764.2	PCDHGC5	-
chr19	4528439	4540079	-	ENSG00000267385.1	CTB-50L17.14	-		chr5	140894583	140998622	-	ENSG00000131504.11	DIAPH1	Activated
chr19	4536421	4540486	-	ENSG00000171236.9	LRG1	-		chr5	141000443	141016437	-	ENSG00000171720.5	HDAC3	-
chr19	4542600	4559820	-	ENSG00000167680.11	SEMA6B	Repressed		chr5	141016517	141020644	+	ENSG00000164620.4	RELL2	-
chr19	4639530	4655580	+	ENSG00000185361.4	TNFAIP8L1	-		chr5	141018869	141030986	-	ENSG00000197948.6	FCHSD1	-
chr19	4641386	4670382	-	ENSG00000074842.3	MYDGF	-		chr5	141032968	141061788	-	ENSG00000120318.11	ARAP3	-
chr19	4675236	4724685	-	ENSG00000142002.12	DPP9	-		chr5	141232938	141258811	-	ENSG00000156453.9	PCDH1	-
chr19	4791728	4795571	+	ENSG00000141965.3	FEM1A	-		chr5	141303373	141321612	+	ENSG00000081791.4	DELE1	Activated
chr19	4815944	4831716	-	ENSG00000127666.8	TICAM1	-		chr5	141323150	141349304	-	ENSG00000113555.4	PCDH12	-
chr19	4838353	4867780	-	ENSG00000105355.4	PLIN3	Activated		chr5	141337893	141369856	+	ENSG00000013561.13	RNF14	-
chr19	4890449	4902879	-	ENSG00000205784.2	ARRDC5	-		chr5	141371314	141392606	-	ENSG00000113552.11	GNPDA1	-
chr19	4969125	5153606	+	ENSG00000127663.10	KDM4B	Activated		chr5	141488070	141534005	+	ENSG00000131507.9	NDFIP1	-
chr19	5158506	5340814	-	ENSG00000105426.10	PTPRS	Activated		chr5	141689992	141706020	-	ENSG00000187678.8	SPRY4	-
chr19	5455426	5456867	+	ENSG00000105428.4	ZNRF4	-		chr5	141971743	142077617	-	ENSG00000113578.13	FGF1	Activated
chr19	5587010	5624057	-	ENSG00000130254.7	SAFB2	Activated		chr5	142149949	142608576	+	ENSG00000145819.11	ARHGAP26	Activated
chr19	5623046	5668489	+	ENSG00000160633.8	SAFB	Activated		chr5	142657496	142815077	-	ENSG00000113580.10	NR3C1	Activated
chr19	5674958	5691887	+	ENSG00000130255.8	RPL36	-		chr5	152869175	153193429	+	ENSG00000155511.13	GRIA1	-
chr19	5678432	5680907	-	ENSG00000174917.4	C19orf70	-		chr5	153369688	153418496	-	ENSG00000055147.13	FAM114A2	-
chr19	5680615	5688533	+	ENSG00000167733.9	HSD11B1L	-		chr5	153418466	153600038	+	ENSG00000037749.7	MFAP3	Repressed
chr19	5691845	5720583	-	ENSG00000196365.7	LONP1	Activated		chr5	159436120	159492550	+	ENSG00000113312.6	TTC1	-
chr19	5720688	5778745	+	ENSG00000174898.11	CATSPERD	-		chr5	159488808	159546430	-	ENSG00000170234.8	PWWP2A	-
chr19	5782971	5784776	-	ENSG00000212123.3	PRR22	-		chr5	159614374	159665742	+	ENSG00000170231.11	FABP6	-
chr19	5784016	5785630	-	ENSG00000267157.1	CTB-54O9.9	-		chr5	159678659	159772403	-	ENSG00000135083.10	CCNJL	Repressed
chr19	5784843	5791249	-	ENSG00000141994.11	DUS3L	Activated		chr5	159774758	159797648	-	ENSG00000145861.7	C1QTNF2	Repressed
chr19	5823813	5828335	+	ENSG00000171119.2	NRTN	-		chr5	159820155	159827104	-	ENSG00000221886.3	ZBED8	-
chr19	5830621	5839742	-	ENSG00000156413.9	FUT6	-		chr5	159828648	159848718	-	ENSG00000164609.5	SLU7	-
chr19	5842899	5851485	-	ENSG00000171124.8	FUT3	-		chr5	159848829	159855748	+	ENSG00000164611.8	PTTG1	-
chr19	5865837	5903798	-	ENSG00000130383.6	FUT5	-		chr5	159990127	160279221	-	ENSG00000118322.8	ATP10B	-
chr19	5866182	5903798	-	ENSG00000267740.1	AC024592.12	-		chr5	160715436	160976050	-	ENSG00000145864.8	GABRB2	-
chr19	5891287	5904017	-	ENSG00000174886.8	NDUFA11	-		chr5	160974069	161129599	+	ENSG00000145863.6	GABRA6	-
chr19	5904852	5914718	+	ENSG00000267314.1	AC104532.2	Activated		chr5	161274197	161326975	+	ENSG00000022355.10	GABRA1	-
chr19	5904869	5910864	+	ENSG00000187650.3	VMAC	-		chr5	161494546	161582542	+	ENSG00000113327.10	GABRG2	-
chr19	5911718	5915888	+	ENSG00000105519.8	CAPS	-		chr6	152442819	152958936	-	ENSG00000131018.18	SYNE1	-
chr19	5916150	5978153	-	ENSG00000031823.10	RANBP3	Activated		chr6	153019030	153045702	+	ENSG00000120279.6	MYCT1	-
chr19	5993175	6199583	-	ENSG00000087903.8	RFX2	Activated		chr6	153071933	153080900	+	ENSG00000146469.8	VIP	-
chr19	6135258	6193112	+	ENSG00000130377.9	ACSBG2	-		chr6	153291664	153304714	-	ENSG00000112029.5	FBXO5	-
chr19	6212966	6279959	-	ENSG00000130382.7	MLLT1	Activated		chr6	153308497	153323820	-	ENSG00000112031.11	MTRF1L	-
chr19	6306153	6333640	-	ENSG00000167769.4	ACER1	-		chr6	153325594	153452384	-	ENSG00000091844.3	RGS17	-
chr19	6361463	6368919	+	ENSG00000125656.4	CLPP	-		chr6	153552455	153668623	+	ENSG00000213121.2	AL590867.1	-
chr19	6372444	6375042	+	ENSG00000125652.3	ALKBH7	-		chr6	157099063	157531913	+	ENSG00000049618.17	ARID1B	Activated
chr19	6375159	6379069	-	ENSG00000125650.4	PSPN	-		chr6	157710418	157744633	-	ENSG00000215712.6	TMEM242	-
chr19	6379580	6393992	-	ENSG00000125651.9	GTF2F1	Activated		chr6	157802165	158099178	+	ENSG00000175048.12	ZDHHC14	Repressed
chr19	6413359	6424805	-	ENSG00000088247.11	KHSRP	-		chr6	158244296	158366109	+	ENSG00000130340.10	SNX9	Activated
chr19	6426048	6433790	-	ENSG00000181240.9	SLC25A41	-		chr6	158402888	158520208	+	ENSG00000078269.9	SYNJ2	Activated
chr19	6436090	6465214	-	ENSG00000125648.10	SLC25A23	Repressed		chr6	158530536	158589312	-	ENSG00000122335.9	SERAC1	Activated
chr19	6463788	6467232	+	ENSG00000130545.11	CRB3	-		chr6	158589384	158620376	+	ENSG00000272047.1	GTF2H5	-
chr19	6467218	6482568	-	ENSG00000205744.5	DENND1C	-		chr6	158733692	158932860	+	ENSG00000130338.8	TULP4	Activated
chr19	6494330	6502859	-	ENSG00000104833.6	TUBB4A	-		chr6	158957468	159056460	+	ENSG00000146433.8	TMEM181	Activated
chr19	6531010	6535931	+	ENSG00000125657.3	TNFSF9	Repressed		chr6	159047471	159049322	+	ENSG00000214239.1	AL591025.1	-
chr19	6583194	6604114	-	ENSG00000125726.6	CD70	-		chr6	159057506	159065771	-	ENSG00000146425.6	DYNLT1	-
chr19	6663148	6670599	-	ENSG00000125735.6	TNFSF14	-		chr6	159071046	159185908	+	ENSG00000164674.11	SYTL3	-
chr19	6677715	6730573	-	ENSG00000125730.12	C3	-		chr6	159186773	159240444	-	ENSG00000092820.13	EZR	Activated
chr19	6729925	6737614	-	ENSG00000125734.9	GPR108	Activated		chr6	159290971	159331385	+	ENSG00000203711.7	C6orf99	Repressed
chr19	6737936	6751537	+	ENSG00000125733.13	TRIP10	Activated		chr6	159393903	159421219	-	ENSG00000130363.7	RSPH3	-
chr19	6752171	6767599	-	ENSG00000125731.8	SH2D3A	-		chr6	159455500	159466184	-	ENSG00000164691.12	TAGAP	-
chr19	6772725	6857377	+	ENSG00000141968.3	VAV1	-		chr6	159590429	159693141	+	ENSG00000164694.12	FNDC1	Repressed
chr19	6887577	6940470	+	ENSG00000174837.10	ADGRE1	-		chr7	38423305	38671167	-	ENSG00000078053.12	AMPH	-
chr19	7011514	7013338	+	ENSG00000204752.3	AC025278.1	-		chr7	38724946	38726637	-	ENSG00000164556.7	FAM183BP	-
chr19	7030589	7033022	+	ENSG00000237247.4	MBD3L5	-		chr7	38762563	38971994	-	ENSG00000006715.11	VPS41	-
chr19	7037759	7040190	-	ENSG00000205718.4	MBD3L4	-		chr7	39017598	39532694	+	ENSG00000106536.15	POU6F2	-
chr19	7049332	7051746	+	ENSG00000230522.3	MBD3L2	-		chr7	39605975	39649919	+	ENSG00000241127.3	YAE1	-
chr19	7056220	7058651	-	ENSG00000182315.4	MBD3L3	-		chr7	39663082	39747723	+	ENSG00000006451.3	RALA	Activated
chr19	7069455	7087979	+	ENSG00000130544.7	ZNF557	-		chr7	39989636	40136733	+	ENSG00000065883.10	CDK13	-
chr19	7112266	7294045	-	ENSG00000171105.9	INSR	-		chr7	40165622	40174258	-	ENSG00000168303.6	MPLKIP	Activated
chr19	7413848	7448271	+	ENSG00000263264.1	CTB-133G6.1	-		chr7	40174575	40900362	+	ENSG00000175600.11	SUGCT	Activated
chr19	7445850	7535131	+	ENSG00000268861.1	CTD-2207O23.3	-		chr7	110303110	111202573	-	ENSG00000184903.5	IMMP2L	-
chr19	7459999	7537363	+	ENSG00000104880.13	ARHGEF18	-		chr7	111366166	111846466	-	ENSG00000128512.15	DOCK4	-
chr19	7541761	7562335	-	ENSG00000104883.3	PEX11G	-		chr7	111846643	111983151	+	ENSG00000198839.5	ZNF277	-
chr19	7557862	7573336	+	ENSG00000198723.6	TEX45	-		chr7	112063023	112121072	+	ENSG00000006652.9	IFRD1	-
chr19	7571938	7584508	+	ENSG00000267952.1	CTD-2207O23.12	-		chr7	112120908	112131117	+	ENSG00000181016.5	LSMEM1	-
chr19	7580178	7585912	+	ENSG00000198816.5	ZNF358	-		chr7	112402437	112430647	-	ENSG00000146802.8	TMEM168	-
chr19	7587512	7598895	+	ENSG00000090674.11	MCOLN1	-		chr7	112459202	112579971	-	ENSG00000164603.7	BMT2	Activated
chr19	7598481	7604945	+	ENSG00000268614.1	CTD-2207O23.10	-		chr7	149941005	150020814	-	ENSG00000106526.6	ACTR3C	-
chr19	7598890	7626650	+	ENSG00000032444.11	PNPLA6	-		chr7	150019728	150035239	+	ENSG00000127399.10	LRRC61	Activated in MT, Repressed in MB
chr19	7660788	7683190	+	ENSG00000076826.5	CAMSAP3	-		chr7	150026938	150029808	+	ENSG00000188707.4	ZBED6CL	-
chr19	7684411	7694451	-	ENSG00000076924.7	XAB2	-		chr7	150035408	150038763	-	ENSG00000106538.5	RARRES2	-
chr19	7694623	7696842	+	ENSG00000229833.5	PET100	-		chr7	150065278	150071133	+	ENSG00000214022.7	REPIN1	-
chr19	7694682	7707934	+	ENSG00000268400.1	CTD-3214H19.4	-		chr7	150065879	150109558	+	ENSG00000196456.4	ZNF775	-
chr19	7696497	7698634	-	ENSG00000174788.5	PCP2	-		chr7	150147718	150176480	+	ENSG00000171115.3	GIMAP8	-
chr19	7701767	7712759	+	ENSG00000076944.10	STXBP2	-		chr7	150211918	150218161	+	ENSG00000179144.4	GIMAP7	-
chr19	7733930	7735334	+	ENSG00000104918.4	RETN	-		chr7	150264365	150271041	+	ENSG00000133574.5	GIMAP4	-
chr19	7741514	7744712	+	ENSG00000183019.3	MCEMP1	-		chr7	150322463	150329473	-	ENSG00000133561.11	GIMAP6	-
chr19	7743387	7747740	+	ENSG00000269711.1	CTD-3214H19.16	-		chr7	150382785	150390729	+	ENSG00000106560.6	GIMAP2	-
chr19	7745729	7747744	+	ENSG00000181029.7	TRAPPC5	-		chr7	150413645	150421372	+	ENSG00000213203.2	GIMAP1	-
chr19	7753644	7767032	-	ENSG00000104921.10	FCER2	-		chr7	150419341	150447121	+	ENSG00000196329.6	GIMAP5	-
chr19	7793843	7798792	-	ENSG00000182566.8	CLEC4G	-		chr7	150488373	150498448	-	ENSG00000106565.13	TMEM176B	-
chr19	7804879	7812464	-	ENSG00000090659.13	CD209	-		chr7	150497491	150502208	+	ENSG00000002933.3	TMEM176A	-
chr19	7828035	7834491	+	ENSG00000104938.12	CLEC4M	-		chr7	150521715	150558592	+	ENSG00000002726.15	AOC1	-
chr19	7895119	7929862	+	ENSG00000142459.4	EVI5L	-		chr7	150642049	150675403	-	ENSG00000055118.10	KCNH2	Repressed
chr19	7933605	7939326	-	ENSG00000183248.7	PRR36	Activated in MB, Repressed in MT		chr7	150688083	150711676	+	ENSG00000164867.6	NOS3	-
chr19	7953390	7966901	+	ENSG00000171017.6	LRRC8E	-		chr7	150709297	150721586	-	ENSG00000181652.14	ATG9B	-
chr19	7963689	7968427	-	ENSG00000214248.2	AC010336.1	-		chr7	150725510	150744869	+	ENSG00000197150.8	ABCB8	Activated
chr19	7968728	7979363	+	ENSG00000076984.13	MAP2K7	Activated		chr7	150745379	150749843	+	ENSG00000213199.3	ASIC3	-
chr19	7981030	7983982	+	ENSG00000260001.2	TGFBR3L	-		chr7	150750899	150755617	-	ENSG00000164885.8	CDK5	-
chr19	7985201	7988135	+	ENSG00000104976.7	SNAPC2	-		chr7	150754297	150773614	+	ENSG00000164889.8	SLC4A2	-
chr19	7989372	7991051	-	ENSG00000178531.4	CTXN1	-		chr7	150773711	150777953	-	ENSG00000164896.15	FASTK	-
chr19	7991603	8008805	-	ENSG00000104980.3	TIMM44	Activated		chr7	150778167	150780633	-	ENSG00000164897.8	TMUB1	-
chr19	8023463	8070543	-	ENSG00000066044.9	ELAVL1	Activated		chr7	150782918	150841523	+	ENSG00000133612.14	AGAP3	-
chr19	8117651	8127534	+	ENSG00000131142.9	CCL25	-		chr7	150845676	150871832	-	ENSG00000164900.4	GBX1	-
chr19	8130286	8214730	-	ENSG00000142449.8	FBN3	-		chr7	150872785	150884919	-	ENSG00000146926.6	ASB10	-
chr19	35084234	35166604	-	ENSG00000205209.3	SCGB2B2	-		chr7	150904923	150924316	-	ENSG00000033050.3	ABCF2	-
chr19	35168544	35177302	+	ENSG00000089335.16	ZNF302	-		chr7	150929575	150935908	+	ENSG00000033100.10	CHPF2	-
chr19	35225060	35233777	+	ENSG00000197841.10	ZNF181	-		chr7	150935850	150974982	-	ENSG00000082014.12	SMARCD3	Repressed
chr19	35248981	35264134	-	ENSG00000153896.13	ZNF599	-		chr7	151038785	151075535	+	ENSG00000013374.11	NUB1	-
chr19	35417807	35436074	+	ENSG00000168661.10	ZNF30	-		chr7	151072995	151107813	-	ENSG00000187260.11	WDR86	-
chr19	35447258	35454953	-	ENSG00000180884.9	ZNF792	-		chr7	151125921	151137899	-	ENSG00000127377.4	CRYGN	Repressed
chr19	35485688	35517375	+	ENSG00000089351.10	GRAMD1A	-		chr7	151163098	151217206	-	ENSG00000106615.5	RHEB	-
chr19	35521588	35531352	+	ENSG00000105711.6	SCN1B	-		chr7	151253197	151574210	-	ENSG00000106617.9	PRKAG2	Activated
chr19	35531410	35557475	+	ENSG00000105707.9	HPN	-		chr7	151653464	151717019	+	ENSG00000106648.9	GALNTL5	-
chr19	35596873	35598141	+	ENSG00000179066.6	AC020907.1	-		chr7	151722759	151819425	+	ENSG00000178234.8	GALNT11	-
chr19	35606732	35615228	+	ENSG00000089356.12	FXYD3	-		chr7	151832010	152133090	-	ENSG00000055609.13	KMT2C	Activated
chr19	35615417	35633355	-	ENSG00000153902.9	LGI4	-		chr8	8859657	8974256	+	ENSG00000104626.10	ERI1	-
chr19	35629712	35634013	+	ENSG00000266964.1	FXYD1	-		chr8	8993765	9009084	-	ENSG00000173281.4	PPP1R3B	-
chr19	35634154	35645204	+	ENSG00000221946.3	FXYD7	-		chr8	9009252	9025646	+	ENSG00000253426.1	RP11-10A14.4	Repressed
chr19	35645633	35660786	+	ENSG00000089327.10	FXYD5	-		chr8	9413424	9639856	+	ENSG00000173273.11	TNKS	Activated
chr19	35715703	35719632	-	ENSG00000177558.3	FAM187B	-		chr8	17780349	17885478	+	ENSG00000078674.13	PCM1	Activated
chr19	35739233	35758867	+	ENSG00000105699.12	LSR	Repressed		chr8	17913934	17942494	-	ENSG00000104763.13	ASAH1	-
chr19	35759881	35770724	+	ENSG00000105698.11	USF2	-		chr8	18027986	18081198	+	ENSG00000171428.9	NAT1	-
chr19	35771619	35776046	+	ENSG00000105697.3	HAMP	-		chr8	18248755	18258728	+	ENSG00000156006.4	NAT2	-
chr19	35783028	35804707	+	ENSG00000105695.10	MAG	-		chr8	18384811	18942240	-	ENSG00000156011.12	PSD3	Activated
chr19	35810164	35838258	+	ENSG00000012124.10	CD22	-		chr8	87480486	87526586	-	ENSG00000176623.7	RMDN1	-
chr19	35842445	35843367	+	ENSG00000126266.2	FFAR1	-		chr8	87497059	87573726	+	ENSG00000085719.7	CPNE3	-
chr19	35849362	35851387	+	ENSG00000185897.6	FFAR3	-		chr8	87566205	87755903	-	ENSG00000170289.8	CNGB3	-
chr19	35861831	35863855	+	ENSG00000126251.5	GPR42	-		chr8	87878670	88627447	+	ENSG00000176571.7	CNBD1	-
chr19	35934809	35942669	+	ENSG00000126262.4	FFAR2	-		chr8	130760442	130799134	-	ENSG00000147697.4	GSDMC	-
chr19	35978226	35986460	-	ENSG00000188508.6	KRTDAP	-		chr8	130851839	131029375	-	ENSG00000153310.14	FAM49B	Activated
chr19	35988122	36004560	-	ENSG00000161249.16	DMKN	-		chr8	131064353	131455906	-	ENSG00000153317.10	ASAP1	Activated
chr19	36014269	36019253	-	ENSG00000189001.6	SBSN	-		chr8	131792547	132054672	-	ENSG00000155897.5	ADCY8	Repressed
chr19	36024314	36036218	+	ENSG00000105679.4	GAPDHS	-		chr8	140613081	140715299	-	ENSG00000169427.2	KCNK9	-
chr19	36036497	36038428	+	ENSG00000105677.7	TMEM147	-		chr8	140742586	141468678	-	ENSG00000167632.10	TRAPPC9	-
chr19	36040945	36054560	-	ENSG00000105675.4	ATP4A	-		chr8	144989321	145050902	-	ENSG00000178209.10	PLEC	Activated
chr19	36103646	36116251	+	ENSG00000249115.4	HAUS5	-		chr8	145051321	145086940	-	ENSG00000178685.9	PARP10	Repressed
chr19	36119932	36128588	+	ENSG00000126254.7	RBM42	Activated		chr8	145064226	145067583	+	ENSG00000178719.12	GRINA	-
chr19	36132647	36135773	+	ENSG00000105672.10	ETV2	-		chr8	145086582	145101933	+	ENSG00000186583.7	SPATC1	-
chr19	36139125	36149763	+	ENSG00000126267.4	COX6B1	-		chr8	145106167	145118735	-	ENSG00000178814.11	OPLAH	-
chr19	36157715	36169367	+	ENSG00000105668.3	UPK1A	-		chr8	145133529	145135550	+	ENSG00000178896.6	EXOSC4	-
chr19	36195429	36207940	+	ENSG00000011590.9	ZBTB32	Repressed		chr8	145137493	145141119	+	ENSG00000197858.6	GPAA1	-
chr19	36208921	36229779	+	ENSG00000272333.1	KMT2B	-		chr8	145149930	145152428	+	ENSG00000179091.4	CYC1	-
chr19	36230058	36233354	-	ENSG00000126246.5	IGFLR1	-		chr8	145153536	145163027	-	ENSG00000179526.12	SHARPIN	Activated
chr19	36230153	36236333	-	ENSG00000267120.3	AD000671.6	-		chr8	145159402	145162514	+	ENSG00000179632.5	MAF1	-
chr19	36233365	36236346	-	ENSG00000161265.10	U2AF1L4	-		chr8	145162629	145173218	+	ENSG00000179698.9	WDR97	Repressed
chr19	36236015	36237911	+	ENSG00000205155.3	PSENEN	-		chr8	145192672	145195746	+	ENSG00000235173.2	HGH1	-
chr19	36236579	36245420	+	ENSG00000188223.9	AC002398.9	Activated		chr8	145202919	145316843	+	ENSG00000179832.13	MROH1	Activated
chr19	36239262	36245420	+	ENSG00000267796.3	LIN37	Activated		chr8	145317003	145331153	-	ENSG00000204775.4	KM-PA-2	Activated
chr19	36245469	36248980	-	ENSG00000004776.7	HSPB6	-		chr8	145321517	145323045	+	ENSG00000187786.1	SCXB	-
chr19	36249044	36261930	+	ENSG00000167595.10	PROSER3	-		chr8	145437880	145440835	+	ENSG00000230567.3	FAM203B	Activated
chr19	36265434	36279724	+	ENSG00000004777.14	ARHGAP33	-		chr8	145486055	145515082	-	ENSG00000170727.7	BOP1	Activated
chr19	36290890	36304201	-	ENSG00000250799.5	PRODH2	-		chr8	145490549	145492470	+	ENSG00000188686.2	SCXA	-
chr19	36316866	36360189	-	ENSG00000161270.15	NPHS1	-		chr8	145515280	145538385	+	ENSG00000185122.6	HSF1	Activated
chr19	36346763	36358011	+	ENSG00000126259.15	KIRREL2	-		chr8	145539954	145550573	-	ENSG00000185000.5	DGAT1	Activated
chr19	36358801	36370693	+	ENSG00000105290.7	APLP1	-		chr8	145554228	145559943	-	ENSG00000170616.9	SCRT1	-
chr19	36378555	36393205	-	ENSG00000167604.9	NFKBID	-		chr8	145575878	145578574	-	ENSG00000214597.4	TMEM249	Repressed
chr19	36393382	36395279	+	ENSG00000126264.5	HCST	-		chr8	145576888	145579269	-	ENSG00000271698.1	TMEM249	Repressed
chr19	36395303	36399197	-	ENSG00000011600.7	TYROBP	-		chr8	145577795	145584932	+	ENSG00000185803.4	SLC52A2	-
chr19	36426260	36436669	+	ENSG00000126243.4	LRFN3	Activated		chr8	145579091	145583036	-	ENSG00000182325.6	FBXL6	-
chr19	36486090	36487220	+	ENSG00000205138.2	SDHAF1	-		chr8	145596790	145618457	+	ENSG00000173137.7	ADCK5	Activated
chr19	36494209	36499695	-	ENSG00000181392.10	SYNE4	-		chr8	145618444	145634753	-	ENSG00000071894.10	CPSF1	Activated
chr19	36500022	36505141	-	ENSG00000239382.6	ALKBH6	-		chr8	145635126	145642279	-	ENSG00000147804.5	SLC39A4	-
chr19	36505562	36524245	-	ENSG00000105270.10	CLIP3	Activated		chr8	145649000	145653931	-	ENSG00000160948.9	VPS28	-
chr19	36525887	36545664	-	ENSG00000161277.9	THAP8	-		chr8	145654165	145669827	-	ENSG00000160949.12	TONSL	-
chr19	36545783	36596008	+	ENSG00000075702.12	WDR62	-		chr8	145674965	145691060	-	ENSG00000187954.8	CYHR1	Activated
chr19	36602104	36604613	+	ENSG00000105261.5	OVOL3	Activated		chr8	145691426	145699585	+	ENSG00000167702.7	KIFC2	Repressed
chr19	36604612	36606248	-	ENSG00000105258.4	POLR2I	-		chr8	145698795	145701718	-	ENSG00000160973.7	FOXH1	-
chr19	36605191	36616849	+	ENSG00000105254.7	TBCB	-		chr8	145703352	145727504	+	ENSG00000160972.5	PPP1R16A	-
chr19	36630477	36641255	+	ENSG00000126247.6	CAPNS1	-		chr8	145728356	145732557	+	ENSG00000167701.9	GPT	Repressed
chr19	36641824	36643771	-	ENSG00000161281.6	COX7A1	-		chr8	145734457	145736596	+	ENSG00000167700.4	MFSD3	-
chr19	36673188	36737159	-	ENSG00000196357.7	ZNF565	-		chr8	145736667	145743229	-	ENSG00000160957.8	RECQL4	-
chr2	5832799	5841516	+	ENSG00000176887.5	SOX11	-		chr8	145743376	145750557	+	ENSG00000160959.3	LRRC14	-
chr2	6980701	7006766	-	ENSG00000134326.7	CMPK2	-		chr8	145747761	145752416	-	ENSG00000254402.2	LRRC24	-
chr2	7005937	7038370	+	ENSG00000134321.7	RSAD2	-		chr8	145751117	145754516	-	ENSG00000213563.2	C8orf82	-
chr2	7057523	7208417	+	ENSG00000151692.10	RNF144A	-		chr8	145754563	145911194	-	ENSG00000147799.7	ARHGAP39	-
chr2	8818975	8824583	+	ENSG00000115738.5	ID2	-		chr8	145946298	145981802	-	ENSG00000198169.4	ZNF251	-
chr2	8865408	8977760	-	ENSG00000134313.10	KIDINS220	Activated		chr8	145998499	146012730	-	ENSG00000196378.7	ZNF34	-
chr2	8992820	9143942	-	ENSG00000143797.7	MBOAT2	-		chr8	146015150	146017972	-	ENSG00000161016.11	RPL8	-
chr2	36583069	36778278	+	ENSG00000150938.5	CRIM1	Activated		chr8	146024261	146036554	+	ENSG00000197363.5	ZNF517	-
chr2	36758948	36779411	-	ENSG00000217075.1	AC007401.2	Activated		chr8	146052849	146072894	+	ENSG00000147789.11	ZNF7	Activated
chr2	36778570	36873230	-	ENSG00000171055.10	FEZ2	-		chr8	146066427	146079121	-	ENSG00000170619.8	COMMD5	Activated
chr2	208394461	208468155	+	ENSG00000118260.10	CREB1	-		chr8	146076632	146127553	-	ENSG00000196150.9	ZNF250	Activated
chr2	208445355	208490652	-	ENSG00000144401.10	METTL21A	-		chr8	146155744	146176274	-	ENSG00000170631.10	ZNF16	-
chr2	208576264	208626563	+	ENSG00000163249.5	CCNYL1	-		chr8	146277764	146281416	+	ENSG00000182307.8	C8orf33	-
chr2	208627310	208634287	-	ENSG00000163251.3	FZD5	Repressed		chr9	102584137	102629173	+	ENSG00000119508.13	NR4A3	Repressed
chr2	208693027	208890284	-	ENSG00000178385.9	PLEKHM3	-		chr9	102668915	102732618	+	ENSG00000136874.6	STX17	Activated
chr2	208986331	208989225	-	ENSG00000118231.4	CRYGD	-		chr9	102741461	102861322	-	ENSG00000023318.7	ERP44	Activated
chr2	208992861	208994554	-	ENSG00000163254.4	CRYGC	-		chr9	102861538	103063282	+	ENSG00000119509.8	INVS	Activated
chr2	209007297	209010892	-	ENSG00000182187.3	CRYGB	-		chr9	103790991	104087417	+	ENSG00000148123.10	PLPPR1	-
chr2	209025464	209028300	-	ENSG00000168582.4	CRYGA	-		chr9	104122699	104145801	-	ENSG00000136881.7	BAAT	-
chr2	209030067	209054797	-	ENSG00000188674.6	C2orf80	-		chr9	104149915	104160896	-	ENSG00000136897.6	MRPL50	-
chr2	209100951	209130798	-	ENSG00000138413.9	IDH1	Activated		chr9	104161155	104172942	+	ENSG00000136870.6	ZNF189	-
chr2	209130991	209223475	+	ENSG00000115020.12	PIKFYVE	Activated		chr9	104182860	104198105	-	ENSG00000136872.13	ALDOB	-
chr2	209224438	209719227	+	ENSG00000144407.5	PTH2R	-		chr9	104235453	104295819	-	ENSG00000165152.4	TMEM246	Repressed
chr2	212240446	213403565	-	ENSG00000178568.9	ERBB4	-		chr9	104296133	104325622	+	ENSG00000155827.7	RNF20	Activated
chr2	212240446	213403565	-	ENSG00000178568.9	ERBB4	-		chr9	104331635	104500862	-	ENSG00000198785.4	GRIN3A	-
chr2	213864429	214017151	-	ENSG00000030419.12	IKZF2	-		chr9	104353897	104357283	-	ENSG00000188386.5	PPP3R2	-
chr2	214149113	215275225	+	ENSG00000144451.14	SPAG16	-		chr9	118916083	119164601	+	ENSG00000182752.8	PAPPA	Activated
chr2	215275789	215443683	+	ENSG00000174453.5	VWC2L	-		chr9	119160439	119162885	-	ENSG00000256040.1	PAPPA-AS1	-
chr20	123010	126392	+	ENSG00000125788.5	DEFB126	-		chr9	119187504	120177348	-	ENSG00000148219.12	ASTN2	-
chr20	138111	139804	+	ENSG00000088782.4	DEFB127	-		chr9	119449581	119463579	+	ENSG00000119401.10	TRIM32	-
chr20	168494	170322	-	ENSG00000185982.6	DEFB128	-		chr9	126141933	126692431	-	ENSG00000119522.11	DENND1A	-
chr20	207899	210527	+	ENSG00000125903.4	DEFB129	-		chr9	126763949	126795580	+	ENSG00000106689.6	LHX2	-
chr20	238377	241737	+	ENSG00000186458.4	DEFB132	-		chr9	127019885	127115586	+	ENSG00000119408.12	NEK6	Activated
chr20	251504	271390	-	ENSG00000196476.7	C20orf96	-		chr9	127115745	127177723	-	ENSG00000136930.8	PSMB7	Activated
chr20	277737	280965	+	ENSG00000177764.6	ZCCHC3	-		chr9	127213423	127239379	+	ENSG00000180264.6	ADGRD2	-
chr20	306207	310865	+	ENSG00000177732.6	SOX12	-		chr9	127243516	127269709	-	ENSG00000136931.5	NR5A1	-
chr20	327426	340304	+	ENSG00000125841.8	NRSN2	-		chr9	127279554	127533589	-	ENSG00000148200.12	NR6A1	Repressed
chr20	361261	378203	+	ENSG00000101255.6	TRIB3	Activated		chr9	127539437	127577164	+	ENSG00000185585.15	OLFML2A	Repressed
chr20	388142	411610	+	ENSG00000125826.15	RBCK1	-		chr9	127615755	127620160	+	ENSG00000136918.3	WDR38	Activated
chr20	416124	443197	-	ENSG00000125875.9	TBC1D20	Activated		chr9	127620159	127624260	-	ENSG00000136942.10	RPL35	-
chr20	459116	524465	-	ENSG00000101266.12	CSNK2A1	Activated		chr9	127624409	127640003	+	ENSG00000136950.9	ARPC5L	Activated
chr20	584441	591042	-	ENSG00000125878.4	TCF15	-		chr9	127640646	127710771	-	ENSG00000136935.9	GOLGA1	-
chr20	627259	634014	-	ENSG00000271303.1	SRXN1	-		chr9	127704887	127905785	-	ENSG00000173611.13	SCAI	-
chr20	627270	656444	-	ENSG00000270299.1	RP5-850E9.3	Repressed		chr9	127908852	127952218	-	ENSG00000119414.7	PPP6C	Activated
chr20	642240	656823	-	ENSG00000215397.3	SCRT2	-		chr9	127962821	127996437	+	ENSG00000136933.12	RABEPK	Activated
chr20	740724	749131	-	ENSG00000101276.10	SLC52A3	-		chr9	129089128	129269320	+	ENSG00000196814.10	MVB12B	-
chr20	814358	838106	+	ENSG00000125898.8	FAM110A	-		chr9	129376722	129463311	+	ENSG00000136944.13	LMX1B	-
chr20	853296	896977	-	ENSG00000101280.6	ANGPT4	-		chr9	129567285	129600489	+	ENSG00000169155.5	ZBTB43	-
chr20	939095	982907	-	ENSG00000101282.4	RSPO4	-		chr9	129622944	129648157	+	ENSG00000177125.5	ZBTB34	Activated
chr20	1093906	1160596	+	ENSG00000125818.13	PSMF1	Activated		chr9	129677053	129985445	+	ENSG00000136828.14	RALGPS1	Repressed
chr20	1161205	1166059	-	ENSG00000125895.5	TMEM74B	-		chr9	129849611	129885162	-	ENSG00000136859.5	ANGPTL2	Repressed
chr20	1184098	1188918	+	ENSG00000215595.1	C20orf202	-		chr9	129986544	130155939	+	ENSG00000136895.14	GARNL3	-
chr20	1206700	1277065	+	ENSG00000244588.1	RAD21L1	Activated		chr9	130159421	130170703	+	ENSG00000136856.13	SLC2A8	Repressed
chr20	1246960	1289972	+	ENSG00000101298.9	SNPH	-		chr9	130186661	130207651	+	ENSG00000196152.6	ZNF79	-
chr20	1290619	1309883	-	ENSG00000125775.10	SDCBP2	Activated		chr9	130209953	130213684	-	ENSG00000197958.8	RPL12	-
chr20	1316228	1317555	-	ENSG00000203630.3	AL136531.1	-		chr9	130213765	130265780	+	ENSG00000148356.9	LRSAM1	Activated
chr20	1349622	1373806	-	ENSG00000088832.10	FKBP1A	-		chrX	2746829	2800859	+	ENSG00000056998.14	GYG2	-
chr20	1422807	1454487	-	ENSG00000088833.13	NSFL1C	Activated		chrX	2822011	2847392	-	ENSG00000006756.11	ARSD	-
chr20	1451386	1472233	-	ENSG00000196209.8	SIRPB2	-		chrX	2852699	2886286	-	ENSG00000157399.10	ARSE	-
chr20	1514897	1539489	-	ENSG00000125900.8	SIRPD	-		chrX	2924654	2951612	+	ENSG00000205667.2	ARSH	-
chr20	1520790	1600655	-	ENSG00000260861.2	RP4-576H24.4	-		chrX	2959512	3030767	+	ENSG00000062096.10	ARSF	-
chr20	1544167	1600707	-	ENSG00000101307.11	SIRPB1	-		chrX	3189861	3202694	+	ENSG00000228459.2	LINC01546	-
chr20	1609798	1638425	-	ENSG00000089012.10	SIRPG	-		chrX	3226606	3264682	-	ENSG00000101825.7	MXRA5	-
chr20	1875154	1920543	+	ENSG00000198053.7	SIRPA	Activated		chrX	3522411	3631649	-	ENSG00000183943.5	PRKX	-
chr20	1959403	1974732	-	ENSG00000101327.4	PDYN	-		chrX	3735569	3761898	-	ENSG00000205664.6	RP11-706O15.1	-
chr20	2082257	2157684	+	ENSG00000125834.8	STK35	-		chrX	5758678	6146904	-	ENSG00000146938.10	NLGN4X	-
chr20	2276647	2321724	+	ENSG00000125780.11	TGM3	-		chrX	6451659	6453159	-	ENSG00000169059.8	VCX3A	-
chr20	2361554	2413399	+	ENSG00000166948.5	TGM6	-		chrX	6966961	7066231	-	ENSG00000130021.9	PUDP	-
chr20	2442280	2451499	-	ENSG00000125835.13	SNRPB	-		chrX	7137497	7272851	+	ENSG00000101846.6	STS	-
chr20	2447858	2489553	-	ENSG00000256566.1	RP4-734P14.4	-		chrX	7810303	7812184	+	ENSG00000182583.8	VCX	-
chr20	2462463	2505348	-	ENSG00000088876.7	ZNF343	-		chrX	7866288	7895780	-	ENSG00000006757.7	PNPLA4	-
chr20	2517253	2622430	+	ENSG00000149488.11	TMC2	Repressed		chrX	8137989	8139308	-	ENSG00000177504.9	VCX2	-
chr20	2632791	2639039	+	ENSG00000101361.10	NOP56	-		chrX	8432871	8434550	+	ENSG00000205642.5	VCX3B	-
chr20	2639041	2644865	-	ENSG00000101365.16	IDH3B	-		chrX	8496915	8700227	-	ENSG00000011201.6	ANOS1	-
chr20	2673524	2740753	+	ENSG00000088881.16	EBF4	-		chrX	8758836	8769424	-	ENSG00000183304.6	FAM9A	-
chr20	2774715	2781283	-	ENSG00000088882.7	CPXM1	-		chrX	8992273	9132680	-	ENSG00000177138.11	FAM9B	-
chr20	2795614	2800930	+	ENSG00000198326.8	TMEM239	-		chrX	9431335	9687780	+	ENSG00000101849.11	TBL1X	Activated
chr20	2795614	2798712	+	ENSG00000241690.3	TMEM239	-		chrX	9693386	9754337	-	ENSG00000101850.8	GPR143	-
chr20	2795633	2796479	+	ENSG00000258713.2	C20orf141	-		chrX	9754496	9917483	+	ENSG00000146950.8	SHROOM2	Repressed
chr20	2815960	2821836	-	ENSG00000132635.12	PCED1A	-		chrX	9935392	9936134	+	ENSG00000234469.2	CLDN34	-
chr20	2821349	2847378	+	ENSG00000215305.5	VPS16	-		chrX	9983602	10112518	+	ENSG00000047644.13	WWC3	-
chr20	2844830	3019722	+	ENSG00000132670.16	PTPRA	Activated		chrX	10125024	10205700	+	ENSG00000073464.7	CLCN4	-
chr20	3024268	3026393	+	ENSG00000125787.7	GNRH2	-
chr20	3026591	3028900	+	ENSG00000125901.5	MRPS26	Activated
chr20	3052266	3053163	+	ENSG00000101405.3	OXT	-
chr20	3063202	3065370	-	ENSG00000101200.5	AVP	-
chr20	3088219	3140842	-	ENSG00000185019.12	UBOX5	-
chr20	3127165	3140543	-	ENSG00000215251.3	FASTKD5	-
chr20	3143263	3154192	-	ENSG00000088899.10	LZTS3	Repressed
chr20	3170996	3185331	-	ENSG00000198171.8	DDRGK1	-
chr20	3189514	3204516	+	ENSG00000125877.8	ITPA	-
chr20	3208063	3219836	-	ENSG00000088836.8	SLC4A11	Repressed
chr20	3229951	3388272	-	ENSG00000088854.11	C20orf194	-
chr20	3451687	3631769	+	ENSG00000088812.13	ATRN	-
chr20	3639939	3644046	-	ENSG00000125861.10	GFRA4	-
chr20	3648612	3662893	-	ENSG00000149451.13	ADAM33	-
chr20	3667617	3687775	-	ENSG00000088827.8	SIGLEC1	Repressed
chr20	3713314	3733758	+	ENSG00000132622.6	HSPA12B	-
chr20	3734155	3749034	-	ENSG00000101220.13	C20orf27	-
chr20	3758151	3762095	-	ENSG00000101222.8	SPEF1	Repressed
chr20	3764498	3767337	-	ENSG00000125817.7	CENPB	-
chr20	3767578	3786762	+	ENSG00000101224.13	CDC25B	-
chr20	3801178	3805949	+	ENSG00000125843.6	AP5S1	-
chr20	3827487	3849280	+	ENSG00000088888.13	MAVS	-
chr20	3869486	3907605	+	ENSG00000125779.17	PANK2	-
chr20	3907956	3996229	-	ENSG00000101236.12	RNF24	Activated
chr20	4050799	4055812	-	ENSG00000205300.3	RP11-352D3.2	-
chr20	4101627	4168394	+	ENSG00000088826.13	SMOX	Activated
chr20	4201329	4229721	-	ENSG00000171873.6	ADRA1D	-
chr20	4666882	4682236	+	ENSG00000171867.12	PRNP	-
chr20	4702556	4709106	+	ENSG00000171864.4	PRND	-
chr20	4711928	4721314	-	ENSG00000180259.5	PRNT	-
chr20	4760669	4804291	-	ENSG00000101265.11	RASSF2	-
chr20	4833002	4990939	-	ENSG00000089057.10	SLC23A2	Activated
chr20	5080486	5093749	-	ENSG00000089063.10	TMEM230	-
chr20	5095599	5107272	-	ENSG00000132646.6	PCNA	Activated
chr20	5107432	5178533	+	ENSG00000101290.9	CDS2	Activated
chr20	5282317	5297378	-	ENSG00000101292.6	PROKR2	-
chr20	5525085	5591672	-	ENSG00000125772.8	GPCPD1	Activated
chr20	5731039	5844558	+	ENSG00000171984.10	SHLD1	-
chr20	5892076	5906007	+	ENSG00000089199.5	CHGB	-
chr20	5917881	5931182	-	ENSG00000089195.10	TRMT6	Activated
chr20	5931298	5975852	+	ENSG00000125885.9	MCM8	-
chr20	5986736	6020699	+	ENSG00000088766.7	CRLS1	-
chr20	6021424	6034695	-	ENSG00000125872.7	LRRN4	Repressed
chr20	6055492	6104191	-	ENSG00000101311.11	FERMT1	-
chr22	16256441	16287937	-	ENSG00000198062.10	POTEH	-
chr22	16448824	16449805	-	ENSG00000130538.4	OR11H1	-
chr22	17071667	17073700	-	ENSG00000198445.3	CCT8L2	-
chr22	17264302	17302589	-	ENSG00000172967.7	XKR3	-
chr22	17442826	17489112	-	ENSG00000215568.3	GAB4	-
chr22	17565844	17596583	+	ENSG00000177663.9	IL17RA	Activated
chr22	17597189	17602257	-	ENSG00000183307.3	TMEM121B	-
chr22	17602476	17612994	+	ENSG00000235478.1	LINC01664	Repressed
chr22	17618401	17646177	-	ENSG00000069998.8	HDHD5	-
chr22	17660194	17702879	-	ENSG00000093072.11	ADA2	Repressed
chr22	17840837	18037850	+	ENSG00000099954.14	CECR2	Repressed
chr22	18043139	18073760	+	ENSG00000182902.9	SLC25A18	Activated
chr22	18074902	18111584	-	ENSG00000131100.8	ATP6V1E1	Activated
chr22	18111621	18213388	+	ENSG00000099968.13	BCL2L13	Activated
chr22	18216906	18257536	-	ENSG00000015475.14	BID	Activated
chr22	18270415	18507325	-	ENSG00000243156.3	MICAL3	Activated
chr22	18560689	18613905	+	ENSG00000215193.8	PEX26	Activated
chr22	18593097	18629321	+	ENSG00000183785.10	TUBA8	-
chr22	18632666	18660164	+	ENSG00000184979.9	USP18	Activated
chr22	18721427	18745407	+	ENSG00000182824.6	FAM230E	-
chr22	18834324	18848562	+	ENSG00000161103.7	AC008132.13	Repressed
chr22	18893541	18901751	+	ENSG00000183628.8	DGCR6	Activated
chr22	18900294	18924066	-	ENSG00000100033.12	PRODH	Repressed
chr22	19023795	19109967	-	ENSG00000070413.14	DGCR2	-
chr22	19117792	19132197	-	ENSG00000100056.7	ESS2	-
chr22	19118321	19120134	+	ENSG00000206203.3	TSSK2	-
chr22	19136089	19137796	-	ENSG00000063515.2	GSC2	-
chr22	19163095	19166343	-	ENSG00000100075.5	SLC25A1	-
chr22	19166986	19279239	-	ENSG00000070371.11	CLTCL1	Activated
chr22	19318221	19435224	-	ENSG00000100084.10	HIRA	-
chr22	19338891	19435755	-	ENSG00000242259.4	C22orf39	-
chr22	19419425	19423598	+	ENSG00000185608.4	MRPL40	-
chr22	19437433	19466738	-	ENSG00000070010.14	UFD1	-
chr22	19466982	19508135	+	ENSG00000093009.5	CDC45	-
chr22	19510547	19515068	-	ENSG00000184113.8	CLDN5	-
chr22	19701987	19712295	+	ENSG00000184702.13	38596	Activated
chr22	19710468	19712294	+	ENSG00000203618.5	GP1BB	Repressed
chr22	19744226	19771116	+	ENSG00000184058.8	TBX1	Repressed
chr22	19770747	19842462	-	ENSG00000185838.9	GNB1L	-
chr22	19833661	19842419	-	ENSG00000215012.4	RTL10	-
chr22	19863040	19929341	-	ENSG00000184470.15	TXNRD2	Activated
chr22	19929130	19957498	+	ENSG00000093010.7	COMT	Activated
chr22	19957419	20004331	-	ENSG00000099889.9	ARVCF	Repressed
chr22	20004537	20053449	+	ENSG00000183597.11	TANGO2	-
chr22	20067755	20099400	+	ENSG00000128191.9	DGCR8	-
chr22	20099389	20104915	-	ENSG00000099899.10	TRMT2A	Activated
chr22	20103461	20114878	+	ENSG00000099901.12	RANBP1	-
chr22	20116979	20135530	+	ENSG00000099904.11	ZDHHC8	Activated
chr22	20135950	20138399	-	ENSG00000234409.4	CCDC188	-
chr22	20228938	20270769	-	ENSG00000040608.9	RTN4R	Repressed
chr22	20301799	20307603	-	ENSG00000128185.5	DGCR6L	-
chr22	20366206	20368028	-	ENSG00000183038.9	GGTLC3	-
chr22	20456003	20461786	-	ENSG00000196622.6	RIMBP3	Repressed
chr22	20692438	20716938	+	ENSG00000188280.7	FAM230G	-
chr22	20704868	20745048	-	ENSG00000161133.12	USP41	-
chr22	20748405	20762745	+	ENSG00000185252.13	ZNF74	-
chr22	20778874	20792146	-	ENSG00000244486.3	SCARF2	-
chr22	20783528	20850170	-	ENSG00000099910.12	KLHL22	-
chr22	20850200	20941919	+	ENSG00000099917.13	MED15	-
chr22	21061979	21213705	-	ENSG00000241973.6	PI4KA	-
chr22	21128167	21142008	+	ENSG00000099937.6	SERPIND1	-
chr22	21213271	21245506	+	ENSG00000099940.7	SNAP29	-
chr22	21271714	21308037	+	ENSG00000099942.8	CRKL	Activated
chr22	21319396	21335649	+	ENSG00000183773.11	AIFM3	Repressed
chr22	21333751	21353327	+	ENSG00000099949.14	LZTR1	Activated
chr22	21353393	21356485	-	ENSG00000184436.7	THAP7	-
chr22	21358030	21360736	-	ENSG00000269103.1	AC002472.1	Activated
chr22	21364097	21383119	+	ENSG00000099957.12	P2RX6	Repressed
chr22	21383007	21387129	-	ENSG00000099960.8	SLC7A4	Repressed
chr22	21400249	21418457	+	ENSG00000187905.6	LRRC74B	Repressed
chr22	21477050	21482352	-	ENSG00000239511.1	POM121L7P	-
chr22	21562262	21581926	-	ENSG00000133475.12	GGT2	-
chr22	21737663	21743446	+	ENSG00000196934.3	RIMBP3B	-
chr22	21771693	21805752	+	ENSG00000169635.5	HIC2	Activated
chr22	21899646	21905750	-	ENSG00000183246.6	RIMBP3C	-
chr22	21903736	21978323	+	ENSG00000185651.10	UBE2L3	Activated
chr22	21982378	21984353	-	ENSG00000161179.9	YDJC	-
chr22	21987005	21991616	+	ENSG00000161180.6	CCDC116	-
chr22	21996550	21998587	+	ENSG00000128228.4	SDF2L1	-
chr22	22006559	22054304	+	ENSG00000100023.13	PPIL2	Activated
chr22	22051833	22090123	-	ENSG00000100027.10	YPEL1	Repressed
chr22	22108789	22221970	-	ENSG00000100030.10	MAPK1	Activated
chr22	22273793	22307209	-	ENSG00000100034.9	PPM1F	Activated
chr22	22311397	22337213	-	ENSG00000100038.15	TOP3B	-
chr22	22599087	22599927	+	ENSG00000169575.4	VPREB1	-
chr22	22838767	22863505	-	ENSG00000198477.3	ZNF280B	Activated
chr22	22868060	22874613	-	ENSG00000169548.3	ZNF280A	-
chr22	22890123	22901768	-	ENSG00000185686.13	PRAME	-
chr22	22901750	22909007	+	ENSG00000220891.1	LL22NC03-63E9.3	-
chr22	22988780	22990368	+	ENSG00000100121.8	GGTLC2	-
chr22	23229960	23238287	+	ENSG00000254709.2	IGLL5	-
chr22	23401593	23487208	-	ENSG00000100218.7	RSPH14	-
chr22	23412540	23467224	+	ENSG00000128266.7	GNAZ	Repressed
chr22	23487513	23506537	+	ENSG00000100228.8	RAB36	-
chr22	23521891	23660224	+	ENSG00000186716.15	BCR	Activated
chr22	23915312	23922495	-	ENSG00000128322.6	IGLL1	-
chr22	23950639	23974508	-	ENSG00000189269.8	DRICH1	-
chr22	24030323	24041363	+	ENSG00000159496.10	RGL4	-
chr22	24083769	24093279	-	ENSG00000187792.3	ZNF70	-
chr22	24094930	24096655	-	ENSG00000128218.7	VPREB3	-
chr22	24105208	24108048	+	ENSG00000169314.10	C22orf15	-
chr22	24108021	24110630	-	ENSG00000250479.4	CHCHD10	-
chr22	24110413	24126503	+	ENSG00000099953.5	MMP11	-
chr22	24124467	24126145	-	ENSG00000267954.1	AP000349.1	-
chr22	24129150	24176703	+	ENSG00000099956.13	SMARCB1	-
chr22	24176690	24181315	-	ENSG00000099958.10	DERL3	Activated
chr22	24198890	24228496	+	ENSG00000133460.15	SLC2A11	Activated
chr22	24204375	24237410	+	ENSG00000251357.4	AP000350.10	-
chr22	24236191	24237414	+	ENSG00000240972.1	MIF	-
chr22	24236613	24241117	-	ENSG00000218537.1	MIF-AS1	-
chr22	24299601	24303373	-	ENSG00000133433.6	GSTT2B	-
chr22	24309089	24314721	+	ENSG00000099974.7	DDTL	-
chr22	24313554	24322660	-	ENSG00000099977.9	DDT	Repressed
chr22	24322339	24326106	+	ENSG00000099984.6	GSTT2	-
chr22	24376133	24384680	-	ENSG00000184674.8	GSTT1	-
chr22	24407642	24574596	+	ENSG00000099991.12	CABIN1	Activated
chr22	24577227	24585078	+	ENSG00000099994.10	SUSD2	-
chr22	24615622	24641110	-	ENSG00000099998.13	GGT5	Activated
chr22	24666786	24813708	+	ENSG00000100014.15	SPECC1L	-
chr22	24666866	24838324	+	ENSG00000258555.2	SPECC1L-ADORA2A	-
chr22	29168662	29185283	+	ENSG00000159873.5	CCDC117	Activated
chr22	29190543	29196585	-	ENSG00000100219.12	XBP1	Activated
chr22	36959968	37099603	-	ENSG00000166862.6	CACNG2	Repressed
chr22	37154246	37172300	-	ENSG00000100360.10	IFT27	-
chr22	37196728	37215523	-	ENSG00000100362.8	PVALB	-
chr22	37257030	37274057	+	ENSG00000100365.10	NCF4	-
chr22	37309670	37336491	+	ENSG00000100368.9	CSF2RB	Repressed
chr22	37387163	37403882	-	ENSG00000185264.7	TEX33	-
chr22	37406900	37415681	-	ENSG00000128311.9	TST	-
chr22	37415676	37425863	+	ENSG00000128309.12	MPST	-
chr3	27757440	27764206	-	ENSG00000163508.8	EOMES	-
chr3	28283075	28366633	+	ENSG00000187118.8	CMC1	-
chr3	28356494	28390618	-	ENSG00000163512.9	AZI2	Activated
chr3	28390637	28579613	+	ENSG00000206559.3	ZCWPW2	-
chr3	53317447	53381654	-	ENSG00000162290.12	DCP1A	Activated
chr3	53528683	53847760	+	ENSG00000157388.9	CACNA1D	-
chr3	53846362	53880417	-	ENSG00000016391.6	CHDH	-
chr3	53880607	53899827	+	ENSG00000056736.5	IL17RB	Activated
chr3	53901093	53916229	-	ENSG00000113812.9	ACTR8	-
chr3	53918437	53926015	-	ENSG00000113811.6	SELENOK	-
chr3	54156574	55108584	+	ENSG00000157445.10	CACNA2D3	-
chr3	168801287	169381406	-	ENSG00000085276.13	MECOM	Repressed
chr3	169484709	169487683	-	ENSG00000184378.2	ACTRT3	-
chr3	169490619	169507504	+	ENSG00000085274.11	MYNN	-
chr3	169511216	169530774	-	ENSG00000171757.11	LRRC34	-
chr3	169539710	169555563	+	ENSG00000188306.6	LRRIQ4	-
chr3	169556967	169587718	-	ENSG00000114248.5	LRRC31	-
chr3	177990720	178562217	+	ENSG00000197584.7	KCNMB2	-
chr3	178735011	178790067	-	ENSG00000172667.6	ZMAT3	Activated
chr3	178865902	178957881	+	ENSG00000121879.3	PIK3CA	-
chr3	178957530	178984790	-	ENSG00000171121.12	KCNMB3	-
chr3	179040779	179053323	+	ENSG00000121864.5	ZNF639	-
chr3	179065480	179112719	+	ENSG00000171109.14	MFN1	-
chr3	179116990	179169378	-	ENSG00000114450.5	GNB4	Activated
chr3	179280668	179306196	+	ENSG00000136518.12	ACTL6A	-
chr3	179306073	179322442	-	ENSG00000136522.9	MRPL47	-
chr3	179322478	179345435	+	ENSG00000136521.8	NDUFB5	-
chr3	180319918	180335616	+	ENSG00000163728.6	TTC14	-
chr3	180320646	180588793	-	ENSG00000145075.7	CCDC39	-
chr3	180585929	180700541	+	ENSG00000114416.13	FXR1	Activated
chr3	180701497	180707562	-	ENSG00000205981.2	DNAJC19	-
chr3	181429714	181432221	+	ENSG00000181449.2	SOX2	-
chr3	191857184	192485553	-	ENSG00000114279.9	FGF12	-
chr3	192514604	192635950	-	ENSG00000180611.6	MB21D2	Activated
chr4	7967039	8160559	-	ENSG00000163995.14	ABLIM2	Repressed
chr4	8183799	8243530	+	ENSG00000125089.12	SH3TC1	Activated
chr4	8271492	8308838	+	ENSG00000170801.5	HTRA3	Activated
chr4	8368009	8442450	-	ENSG00000087008.11	ACOX3	-
chr4	8437867	8495258	+	ENSG00000155275.14	TRMT44	Activated
chr4	8560452	8621486	+	ENSG00000155269.7	GPR78	Repressed
chr4	8594387	8621488	+	ENSG00000109625.14	CPZ	Repressed
chr4	8847802	8873543	-	ENSG00000215612.5	HMX1	-
chr4	10488019	10686489	-	ENSG00000109684.10	CLNK	-
chr4	15004298	15071777	+	ENSG00000137449.11	CPEB2	Activated
chr4	15606162	15683302	-	ENSG00000118564.10	FBXL5	Activated
chr4	15683285	15707188	+	ENSG00000237765.2	FAM200B	Repressed
chr4	15704573	15739936	+	ENSG00000109743.6	BST1	Repressed
chr4	15779898	15854853	+	ENSG00000004468.8	CD38	-
chr4	15937192	15940363	-	ENSG00000137440.3	FGFBP1	-
chr4	15961866	15970932	-	ENSG00000137441.7	FGFBP2	-
chr4	15964699	16086001	-	ENSG00000007062.7	PROM1	Repressed
chr4	16162128	16229033	-	ENSG00000169762.12	TAPT1	-
chr4	53739149	54232242	-	ENSG00000184178.11	SCFD2	Activated
chr4	69176105	69215807	-	ENSG00000083896.8	YTHDC1	-
chr4	69313167	69363322	+	ENSG00000087128.5	TMPRSS11E	-
chr4	75669969	75719896	-	ENSG00000174808.7	BTC	-
chr4	75858305	75975325	+	ENSG00000169116.7	PARM1	-
chr4	91048686	92523064	+	ENSG00000184305.10	CCSER1	-
chr4	93218402	93225329	-	ENSG00000248511.1	RP11-9B6.1	-
chr4	93225550	94695707	+	ENSG00000152208.7	GRID2	-
chr4	122589110	122618268	-	ENSG00000164111.10	ANXA5	Activated
chr4	122680088	122686582	-	ENSG00000164112.8	TMEM155	-
chr4	122685740	122687962	+	ENSG00000226757.1	AC079341.1	-
chr4	122722472	122738176	+	ENSG00000123737.8	EXOSC9	-
chr4	122737599	122745087	-	ENSG00000145386.5	CCNA2	-
chr4	122745595	122791652	-	ENSG00000138686.5	BBS7	-
chr4	122800182	122872909	-	ENSG00000138741.6	TRPC3	-
chr4	129730779	129796379	+	ENSG00000077684.11	JADE1	Activated
chr4	129786076	130014764	-	ENSG00000151466.7	SCLT1	-
chr5	33523640	33892297	-	ENSG00000151388.6	ADAMTS12	-
chr5	33936491	33939023	+	ENSG00000182631.5	RXFP3	-
chr5	33944721	33984835	-	ENSG00000164175.10	SLC45A2	-
chr5	33986283	34008220	-	ENSG00000242110.3	AMACR	-
chr5	33987279	34124633	-	ENSG00000273294.1	C1QTNF3-AMACR	-
chr5	34019553	34043937	-	ENSG00000082196.16	C1QTNF3	-
chr5	34656342	34832732	+	ENSG00000039560.9	RAI14	Activated
chr5	34838938	34899561	+	ENSG00000205838.8	TTC23L	-
chr5	34905369	34919094	-	ENSG00000113456.14	RAD1	-
chr5	34915481	34926101	+	ENSG00000113460.8	BRIX1	-
chr5	34929698	34959069	+	ENSG00000168724.10	DNAJC21	-
chr5	34998206	35048198	-	ENSG00000113492.9	AGXT2	-
chr5	35048861	35230794	-	ENSG00000113494.12	PRLR	Repressed
chr5	35051012	35051198	+	ENSG00000269027.1	AC010368.2	-
chr5	35617946	35814713	+	ENSG00000152582.8	SPEF2	-
chr5	132532147	132948255	-	ENSG00000053108.12	FSTL4	Repressed
chr5	140018325	140027370	-	ENSG00000131495.4	NDUFA2	Activated
chr5	140019012	140024993	+	ENSG00000113119.8	TMCO6	-
chr5	140026643	140042064	+	ENSG00000113141.11	IK	-
chr5	140044261	140053709	+	ENSG00000120314.14	WDR55	Activated
chr5	140050379	140053171	-	ENSG00000256453.1	DND1	-
chr5	140052758	140071609	-	ENSG00000170445.8	HARS	Activated
chr5	140071011	140078889	+	ENSG00000112855.10	HARS2	Activated
chr5	140078265	140086248	+	ENSG00000146007.6	ZMAT2	-
chr5	140165876	140391929	+	ENSG00000204970.5	PCDHA1	-
chr5	140174444	140391929	+	ENSG00000204969.5	PCDHA2	-
chr5	140180783	140391929	+	ENSG00000255408.2	PCDHA3	-
chr5	140186659	140391929	+	ENSG00000204967.6	PCDHA4	-
chr5	140201222	140391929	+	ENSG00000204965.4	PCDHA5	-
chr5	140207563	140391929	+	ENSG00000081842.13	PCDHA6	-
chr5	140213969	140391929	+	ENSG00000204963.4	PCDHA7	-
chr5	140220907	140391929	+	ENSG00000204962.4	PCDHA8	-
chr5	140227048	140391929	+	ENSG00000204961.5	PCDHA9	-
chr5	140235595	140391929	+	ENSG00000250120.2	PCDHA10	-
chr5	140240341	140243224	-	ENSG00000249034.1	AC005609.1	-
chr5	140248689	140391929	+	ENSG00000249158.2	PCDHA11	-
chr5	140255058	140391929	+	ENSG00000251664.2	PCDHA12	-
chr5	140261793	140391929	+	ENSG00000239389.3	PCDHA13	-
chr5	140306302	140391929	+	ENSG00000248383.3	PCDHAC1	-
chr5	140345820	140391936	+	ENSG00000243232.3	PCDHAC2	-
chr5	140430979	140433512	+	ENSG00000171815.3	PCDHB1	-
chr5	140474227	140476962	+	ENSG00000112852.4	PCDHB2	Repressed
chr5	140480234	140483406	+	ENSG00000113205.2	PCDHB3	-
chr5	140501581	140505201	+	ENSG00000081818.1	PCDHB4	-
chr5	140514800	140517703	+	ENSG00000113209.6	PCDHB5	-
chr5	140529683	140532868	+	ENSG00000113211.3	PCDHB6	-
chr5	140535577	140538639	+	ENSG00000255622.1	PCDHB17P	-
chr5	140552243	140555957	+	ENSG00000113212.4	PCDHB7	-
chr5	140557371	140560081	+	ENSG00000120322.2	PCDHB8	-
chr5	140560980	140565793	+	ENSG00000196963.2	PCDHB16	-
chr5	140571942	140575215	+	ENSG00000120324.4	PCDHB10	-
chr5	140579183	140582618	+	ENSG00000197479.4	PCDHB11	-
chr5	140588269	140591696	+	ENSG00000120328.4	PCDHB12	-
chr5	140593509	140596993	+	ENSG00000187372.9	PCDHB13	-
chr5	140602931	140605858	+	ENSG00000120327.4	PCDHB14	-
chr5	140625147	140627799	+	ENSG00000113248.3	PCDHB15	-
chr5	140682196	140683612	-	ENSG00000120329.4	SLC25A2	-
chr5	140698057	140700330	-	ENSG00000178913.5	TAF7	-
chr5	140710252	140892546	+	ENSG00000204956.4	PCDHGA1	Activated in MT, Repressed in MB
chr5	140718539	140892546	+	ENSG00000081853.13	PCDHGA2	Repressed
chr5	140723601	140892546	+	ENSG00000254245.1	PCDHGA3	-
chr5	140729828	140892546	+	ENSG00000254221.1	PCDHGB1	-
chr5	140734768	140892546	+	ENSG00000262576.1	PCDHGA4	-
chr5	140739703	140892546	+	ENSG00000253910.1	PCDHGB2	-
chr5	140743898	140892546	+	ENSG00000253485.1	PCDHGA5	-
chr5	140749831	140892546	+	ENSG00000262209.1	PCDHGB3	-
chr5	140753651	140892546	+	ENSG00000253731.1	PCDHGA6	-
chr5	140762467	140892546	+	ENSG00000253537.1	PCDHGA7	-
chr5	140767452	140892546	+	ENSG00000253953.1	PCDHGB4	-
chr5	140772381	140892546	+	ENSG00000253767.1	PCDHGA8	-
chr5	140782520	140892546	+	ENSG00000261934.1	PCDHGA9	-
chr5	140787770	140892546	+	ENSG00000253305.1	PCDHGB6	-
chr5	140792743	140892546	+	ENSG00000253846.1	PCDHGA10	-
chr5	140797427	140892546	+	ENSG00000254122.1	PCDHGB7	-
chr5	140800762	140891835	+	ENSG00000253873.1	PCDHGA11	-
chr5	140810185	140892546	+	ENSG00000253159.1	PCDHGA12	-
chr5	140855580	140892542	+	ENSG00000240184.2	PCDHGC3	-
chr5	140864741	140892546	+	ENSG00000242419.1	PCDHGC4	Activated
chr5	140868808	140892546	+	ENSG00000240764.2	PCDHGC5	-
chr5	140894583	140998622	-	ENSG00000131504.11	DIAPH1	Activated
chr5	141000443	141016437	-	ENSG00000171720.5	HDAC3	-
chr5	141016517	141020644	+	ENSG00000164620.4	RELL2	-
chr5	141018869	141030986	-	ENSG00000197948.6	FCHSD1	-
chr5	141032968	141061788	-	ENSG00000120318.11	ARAP3	-
chr5	141232938	141258811	-	ENSG00000156453.9	PCDH1	-
chr5	141303373	141321612	+	ENSG00000081791.4	DELE1	Activated
chr5	141323150	141349304	-	ENSG00000113555.4	PCDH12	-
chr5	141337893	141369856	+	ENSG00000013561.13	RNF14	-
chr5	141371314	141392606	-	ENSG00000113552.11	GNPDA1	-
chr5	141488070	141534005	+	ENSG00000131507.9	NDFIP1	-
chr5	141689992	141706020	-	ENSG00000187678.8	SPRY4	-
chr5	141971743	142077617	-	ENSG00000113578.13	FGF1	Activated
chr5	142149949	142608576	+	ENSG00000145819.11	ARHGAP26	Activated
chr5	142657496	142815077	-	ENSG00000113580.10	NR3C1	Activated
chr5	159343790	159399551	+	ENSG00000170214.3	ADRA1B	-
chr5	159436120	159492550	+	ENSG00000113312.6	TTC1	-
chr5	159488808	159546430	-	ENSG00000170234.8	PWWP2A	-
chr5	159614374	159665742	+	ENSG00000170231.11	FABP6	-
chr5	159678659	159772403	-	ENSG00000135083.10	CCNJL	Repressed
chr5	159774758	159797648	-	ENSG00000145861.7	C1QTNF2	Repressed
chr5	159820155	159827104	-	ENSG00000221886.3	ZBED8	-
chr5	159828648	159848718	-	ENSG00000164609.5	SLU7	-
chr5	159848829	159855748	+	ENSG00000164611.8	PTTG1	-
chr5	159990127	160279221	-	ENSG00000118322.8	ATP10B	-
chr5	160715436	160976050	-	ENSG00000145864.8	GABRB2	-
chr5	160974069	161129599	+	ENSG00000145863.6	GABRA6	-
chr5	161274197	161326975	+	ENSG00000022355.10	GABRA1	-
chr5	161494546	161582542	+	ENSG00000113327.10	GABRG2	-
chr6	72596406	73112845	+	ENSG00000079841.14	RIMS1	-
chr6	73331520	73908574	+	ENSG00000185760.11	KCNQ5	Activated
chr6	73919469	73972919	-	ENSG00000243501.5	RP11-257K9.8	-
chr6	73933267	73935493	-	ENSG00000256980.4	KHDC1L	-
chr6	73951037	74020088	-	ENSG00000135314.8	KHDC1	-
chr6	74062785	74064018	-	ENSG00000203909.3	DPPA5	-
chr6	74072400	74073894	+	ENSG00000203908.3	KHDC3L	-
chr6	74078278	74104856	-	ENSG00000203907.5	OOEP	-
chr6	74104471	74127292	+	ENSG00000080007.6	DDX43	-
chr6	74123238	74161999	-	ENSG00000164430.11	CGAS	-
chr6	74171301	74218959	+	ENSG00000135297.11	MTO1	Activated
chr6	74225473	74233520	-	ENSG00000156508.13	EEF1A1	-
chr6	74303102	74363878	-	ENSG00000119899.11	SLC17A5	-
chr6	105725440	105850959	-	ENSG00000085377.9	PREP	Activated
chr6	106534195	106557814	+	ENSG00000057657.10	PRDM1	-
chr6	121400640	121655891	-	ENSG00000146350.9	TBC1D32	-
chr6	129204342	129837714	+	ENSG00000196569.7	LAMA2	Activated
chr6	129897277	130031370	-	ENSG00000146376.6	ARHGAP18	Activated
chr6	130152389	130182692	-	ENSG00000203756.3	TMEM244	-
chr6	130334844	130462594	+	ENSG00000198945.3	L3MBTL3	-
chr6	130465460	130686570	-	ENSG00000164483.12	SAMD3	-
chr6	130686879	130764208	+	ENSG00000164484.7	TMEM200A	-
chr6	131148546	131158275	+	ENSG00000256162.2	SMLR1	-
chr6	131160487	131384462	-	ENSG00000079819.12	EPB41L2	-
chr6	148593440	148873186	+	ENSG00000111961.12	SASH1	Activated
chr6	149068464	149398126	+	ENSG00000111962.7	UST	Activated
chr7	93053799	93204042	-	ENSG00000004948.9	CALCR	-
chr7	93220885	93540577	+	ENSG00000127928.8	GNGT1	Repressed
chr7	98475556	98610866	+	ENSG00000196367.8	TRRAP	-
chr7	98625061	98741723	-	ENSG00000198742.5	SMURF1	Activated
chr7	98771197	98805129	-	ENSG00000185467.7	KPNA7	-
chr7	98923521	98985787	+	ENSG00000241685.4	ARPC1A	Activated
chr7	98971872	98992424	+	ENSG00000130429.8	ARPC1B	-
chr7	98989671	99006452	-	ENSG00000106244.8	PDAP1	Activated
chr7	99006264	99017239	+	ENSG00000106245.5	BUD31	-
chr7	99014362	99063787	-	ENSG00000106246.13	PTCD1	-
chr7	99017372	99063820	-	ENSG00000248919.3	ATP5MF-PTCD1	-
chr7	99036545	99054994	+	ENSG00000160917.10	CPSF4	-
chr7	99040552	99040747	+	ENSG00000214314.1	AC073063.1	-
chr7	99046098	99063954	-	ENSG00000241468.3	ATP5MF	-
chr7	99070464	99101273	+	ENSG00000198556.9	ZNF789	Activated
chr7	99084142	99097947	-	ENSG00000160908.14	ZNF394	-
chr7	99102274	99132323	+	ENSG00000196652.7	ZKSCAN5	-
chr7	99143931	99156159	-	ENSG00000221909.2	FAM200A	-
chr7	99156029	99174076	+	ENSG00000197343.6	ZNF655	-
chr7	99156291	99205433	+	ENSG00000272647.1	GS1-259H13.10	Repressed
chr7	99214569	99230030	+	ENSG00000197037.6	ZSCAN25	Activated
chr7	99245817	99277621	-	ENSG00000106258.9	CYP3A5	-
chr7	99302660	99332819	-	ENSG00000160870.8	CYP3A7	-
chr7	99354604	99381888	-	ENSG00000160868.10	CYP3A4	-
chr7	99425636	99463718	+	ENSG00000021461.12	CYP3A43	-
chr7	99473610	99474680	-	ENSG00000244623.1	OR2AE1	Repressed
chr7	99474581	99517223	-	ENSG00000146833.11	TRIM4	Activated
chr7	99520892	99527243	-	ENSG00000176402.5	GJC3	Activated in MB, Repressed in MT
chr7	99564343	99573780	-	ENSG00000160862.8	AZGP1	-
chr7	99613204	99639312	+	ENSG00000106261.12	ZKSCAN1	-
chr7	99647390	99662661	+	ENSG00000166529.10	ZSCAN21	Activated
chr7	99661656	99680171	-	ENSG00000166526.12	ZNF3	Activated
chr7	99686577	99689823	+	ENSG00000168090.5	COPS6	-
chr7	99690351	99699563	-	ENSG00000166508.13	MCM7	Activated
chr7	99699172	99707968	+	ENSG00000221838.5	AP4M1	Activated
chr7	99704693	99717464	-	ENSG00000106290.10	TAF6	-
chr7	99717236	99723134	+	ENSG00000166997.3	CNPY4	-
chr7	99724317	99726118	+	ENSG00000214309.3	MBLAC1	-
chr7	99746530	99753567	+	ENSG00000188186.6	LAMTOR4	Activated
chr7	99752043	99756338	-	ENSG00000146826.10	C7orf43	Activated
chr7	99756867	99766373	-	ENSG00000197093.6	GAL3ST4	Repressed
chr7	99767229	99774995	-	ENSG00000213420.3	GPC2	Activated
chr7	99775186	99819111	+	ENSG00000066923.13	STAG3	-
chr7	99798283	99869855	-	ENSG00000160844.6	GATS	-
chr7	99815864	99819113	+	ENSG00000213413.2	PVRIG	-
chr7	99905325	99919819	+	ENSG00000214300.6	SPDYE3	-
chr7	99933737	99965356	+	ENSG00000121716.14	PILRB	-
chr7	99965153	99997719	+	ENSG00000085514.11	PILRA	-
chr7	99998449	100026615	-	ENSG00000078487.13	ZCWPW1	-
chr7	100026413	100031741	+	ENSG00000146834.9	MEPCE	-
chr7	100032905	100034188	-	ENSG00000160813.2	PPP1R35	-
chr7	100054238	100061894	-	ENSG00000185955.4	C7orf61	-
chr7	100060982	100076902	-	ENSG00000166925.4	TSC22D4	Activated
chr7	100081550	100092422	+	ENSG00000166924.4	NYAP1	-
chr7	100136834	100165842	+	ENSG00000106351.8	AGFG2	-
chr7	100169855	100183776	-	ENSG00000077454.11	LRCH4	-
chr7	100169855	100171270	-	ENSG00000205307.6	SAP25	-
chr7	126078652	126893348	-	ENSG00000179603.13	GRM8	-
chr7	126986844	127071978	-	ENSG00000048405.5	ZNF800	Repressed
chr8	19674651	19709594	+	ENSG00000104613.7	INTS10	-
chr8	19759228	19824769	+	ENSG00000175445.10	LPL	-
chr8	86747543	86749570	+	ENSG00000223524.2	REXO1L11P	-
chr8	86756718	86758745	-	ENSG00000255940.1	REXO1L10P	-
chr8	86999552	87166457	+	ENSG00000147614.3	ATP6V0D2	-
chr8	87060602	87100850	-	ENSG00000147613.3	PSKH2	-
chr8	87226281	87333375	-	ENSG00000164893.4	SLC7A13	-
chr8	98656407	98740998	+	ENSG00000147649.5	MTDH	Activated
chr8	98787285	98865241	+	ENSG00000104341.12	LAPTM4B	Activated
chr8	98881068	99048944	+	ENSG00000132561.9	MATN2	Repressed
chr8	99037079	99058697	-	ENSG00000156482.6	RPL30	Activated
chr8	99076539	99105838	+	ENSG00000177459.6	ERICH5	-
chr8	99114572	99129469	-	ENSG00000132541.6	RIDA	-
chr8	99129525	99172062	+	ENSG00000104356.6	POP1	Activated
chr8	99202061	99306621	-	ENSG00000104361.5	NIPAL2	-
chr8	123793633	123986750	+	ENSG00000178764.6	ZHX2	-
chr8	124025404	124054663	-	ENSG00000136986.5	DERL1	Activated
chr8	124054208	124164393	+	ENSG00000156787.12	TBC1D31	-
chr8	124191200	124222314	+	ENSG00000147689.12	FAM83A	-
chr8	124232196	124253638	-	ENSG00000189376.7	C8orf76	-
chr8	124238431	124279627	-	ENSG00000259305.1	ZHX1-C8orf76	-
chr8	124260696	124287781	-	ENSG00000165156.10	ZHX1	-
chr8	124332090	124428590	-	ENSG00000156802.8	ATAD2	-
chr8	124428965	124479470	+	ENSG00000156795.2	WDYHV1	-
chr8	124510129	124553446	-	ENSG00000156804.3	FBXO32	Activated
chr8	124657767	124665190	-	ENSG00000175946.8	KLHL38	Repressed
chr8	124693034	124749647	-	ENSG00000104537.12	ANXA13	Repressed
chr8	124780696	124827692	+	ENSG00000176853.11	FAM91A1	-
chr8	124864227	125132302	+	ENSG00000214814.2	FER1L6	Repressed
chr9	20341663	20622542	-	ENSG00000171843.11	MLLT3	-
chr9	20658308	20995954	+	ENSG00000188352.8	FOCAD	Activated
chr9	25676396	25678856	-	ENSG00000198680.3	TUSC1	-
chr9	67784944	67786624	-	ENSG00000232833.4	FAM27E3	-
chr9	67792938	67794111	-	ENSG00000170215.4	FAM27B	-
chr9	67924791	67925210	-	ENSG00000233434.3	BX649567.1	-
chr9	67926761	67969840	+	ENSG00000196774.3	ANKRD20A1	-
chr9	67968793	67987998	+	ENSG00000155282.7	RP11-195B21.3	-
chr9	69199480	69202204	-	ENSG00000204793.4	FOXD4L6	-
chr9	69204538	69269662	-	ENSG00000204790.8	CBWD6	-
chr9	69252845	69254032	+	ENSG00000196400.3	BX255923.1	-
chr9	69377902	69380597	-	ENSG00000204788.3	CR769776.1	-
chr9	69381812	69425560	+	ENSG00000172014.11	ANKRD20A4	-
chr9	69650263	69660358	+	ENSG00000176134.4	AL445665.1	Activated in MB, Repressed in MT
chr9	70175707	70178815	-	ENSG00000204779.2	FOXD4L5	-
chr9	70426623	70429731	-	ENSG00000184659.4	FOXD4L4	-
chr9	70432004	70497240	-	ENSG00000147996.12	CBWD5	-
chr9	70646589	70648956	+	ENSG00000269337.1	AL591479.1	-
chr9	70856397	70914929	+	ENSG00000196873.11	CBWD3	Activated
chr9	70866135	70866572	-	ENSG00000228537.1	AL353608.1	-
chr9	87283466	87638505	+	ENSG00000148053.11	NTRK2	-
chr9	88161455	88356944	-	ENSG00000135049.11	AGTPBP1	-
chr9	88556061	88637213	+	ENSG00000135040.11	NAA35	Activated
chr9	88641061	88715088	-	ENSG00000135052.12	GOLM1	-
chr9	88835180	88874572	-	ENSG00000187753.8	C9orf153	-
chr9	88879461	88897676	-	ENSG00000135070.9	ISCA1	-
chr9	88902648	88969369	-	ENSG00000083223.13	TUT7	Activated
chr9	118916083	119164601	+	ENSG00000182752.8	PAPPA	Activated
chr9	126141933	126692431	-	ENSG00000119522.11	DENND1A	-
chrX	8496915	8700227	-	ENSG00000011201.6	ANOS1	-
chrX	8758836	8769424	-	ENSG00000183304.6	FAM9A	-
chrX	8992273	9132680	-	ENSG00000177138.11	FAM9B	-
chrX	9431335	9687780	+	ENSG00000101849.11	TBL1X	Activated
chrX	9693386	9754337	-	ENSG00000101850.8	GPR143	-
chrX	9754496	9917483	+	ENSG00000146950.8	SHROOM2	Repressed
chrX	9935392	9936134	+	ENSG00000234469.2	CLDN34	-
chrX	9983602	10112518	+	ENSG00000047644.13	WWC3	-
chrX	10125024	10205700	+	ENSG00000073464.7	CLCN4	-
chrX	10413350	10851773	-	ENSG00000101871.10	MID1	-
chrX	15253410	15288589	-	ENSG00000102048.11	ASB9	-
chrX	15298053	15333778	-	ENSG00000165192.9	ASB11	-
chrX	15337573	15353676	-	ENSG00000165195.9	PIGA	-
chrX	15363713	15402498	-	ENSG00000165197.4	VEGFD	-
chrX	15402921	15511687	-	ENSG00000087842.6	PIR	Activated
chrX	15482369	15574652	+	ENSG00000102010.10	BMX	-
chrX	15579156	15620271	-	ENSG00000130234.6	ACE2	-
chrX	15645441	15683154	-	ENSG00000147003.5	CLTRN	-
chrX	15706953	15805747	+	ENSG00000169239.8	CA5B	-
chrX	15808595	15841383	+	ENSG00000169249.8	ZRSR2	-
chrX	15843929	15873054	-	ENSG00000182287.9	AP1S2	-
chrX	16141679	16171144	+	ENSG00000126010.5	GRPR	-
chrX	16185604	16189587	+	ENSG00000182798.6	MAGEB17	-
chrX	17393543	17754114	+	ENSG00000188158.10	NHS	Repressed
chrX	17755588	17773105	+	ENSG00000047634.10	SCML1	-
chrX	119029800	119054679	+	ENSG00000186471.8	AKAP14	-
chrX	119059014	119077735	-	ENSG00000101882.5	NKAP	-
chrX	119205848	119211707	-	ENSG00000203989.2	RHOXF2B	-
chrX	119243011	119249847	-	ENSG00000101883.4	RHOXF1	-
chrX	119292467	119297945	+	ENSG00000131721.4	RHOXF2	-
chrX	119384607	119392253	+	ENSG00000177485.6	ZBTB33	-
chrX	119392505	119445411	-	ENSG00000125355.11	TMEM255A	-
chrX	119495967	119516226	+	ENSG00000101892.7	ATP1B4	Repressed
chrX	119561682	119603220	-	ENSG00000005893.11	LAMP2	-
chrX	119658464	119709649	-	ENSG00000158290.12	CUL4B	-
chrX	119727865	119754929	+	ENSG00000232119.3	MCTS1	-
chrX	119759648	119764005	-	ENSG00000171155.7	C1GALT1C1	-
chrX	120006457	120009779	-	ENSG00000236446.2	CT47B1	-
chrX	120011344	120066151	-	ENSG00000226685.2	CT47A12	-
chrX	120067700	120071012	-	ENSG00000226929.2	CT47A11	-
chrX	120072561	120075873	-	ENSG00000224089.2	CT47A10	-
chrX	120077421	120080733	-	ENSG00000226600.2	CT47A9	-
chrX	120082282	120085594	-	ENSG00000230347.2	CT47A8	-
chrX	120087142	120090454	-	ENSG00000228517.2	CT47A7	-
chrX	120092019	120100198	-	ENSG00000237957.3	CT47A5	-
chrX	120092025	120095337	-	ENSG00000226023.2	CT47A6	-
chrX	120101746	120105058	-	ENSG00000230594.2	CT47A4	-
chrX	120106606	120109918	-	ENSG00000236126.2	CT47A3	-
chrX	120111460	120119642	-	ENSG00000236371.3	CT47A1	-
chrX	120111466	120114778	-	ENSG00000242362.1	CT47A2	-
chrX	120181462	120183794	+	ENSG00000182890.3	GLUD2	-
chrX	125683369	125686834	-	ENSG00000198889.3	DCAF12L1	-
chrX	125953747	125955769	+	ENSG00000183631.4	PRR32	-
chrX	135383122	135519215	+	ENSG00000156920.6	ADGRG4	-
chrX	135570046	135575939	+	ENSG00000102239.4	BRS3	-
chrX	135579238	135594505	+	ENSG00000102241.7	HTATSF1	Activated
chrX	135614311	135638966	+	ENSG00000102243.8	VGLL1	-
chrX	135730352	135742549	+	ENSG00000102245.3	CD40LG	-
chrX	135747706	135864247	-	ENSG00000129675.11	ARHGEF6	Activated
chrX	135930163	135962923	-	ENSG00000147274.10	RBMX	-
chrX	136112307	136113833	-	ENSG00000165370.1	GPR101	-

## Sheet: FSHD1 altered genes summary
FSHD1 altered genes summary
Viewpoint	Genes in CN interactions	Genes in FSHD1 interactions	Genes in FSHD1 lost interactions	Altered genes - activated (MB/MT)	Altered genes - repressed (MB/MT)
4q-D4Z4	2615	1938	1614	319	131
10q-D4Z4	1395	1346	1059	238	106

## Sheet: GO for 4q altered genes
GO analysis for lost activated 4q-D4Z4 genes in FSHD1
GOID	Ontology Source	GOTerm	GOLevels	GOGroups	Nr. Genes	% Associated Genes	Term PValue	Term PValue Corrected with Bonferroni step down	Group PValue	Group PValue Corrected with Bonferroni step down	Associated Genes Found	All Associated Genes	OverViewTerm
GO:0000132	GO_BiologicalProcess_18.04.2016_13h50	establishment of mitotic spindle orientation	[5, 6, 7, 8]	[None]	4	18.1818	0.000444222	0.0230995	{None=NaN}	{None=NaN}	[NDC80, NUMA1, PAFAH1B1, WDR81]	[ARHGEF2, CDK5RAP2, CENPA, DYNLT1, EYA1, FGF10, GPSM2, HTT, MCPH1, NDC80, NDE1, NDEL1, NUMA1, PAFAH1B1, PAX6, SLC6A4, SPDL1, SPRY1, SPRY2, WDR43, WDR81, ZW10]	TRUE
GO:0000209	GO_BiologicalProcess_18.04.2016_13h50	protein polyubiquitination	[9, 10]	[None]	13	5.11811	0.000369467	0.0195818	{None=NaN}	{None=NaN}	[CDC34, FZR1, PPIL2, PSMB5, PSMF1, RNF126, RNF24, SASH1, SMURF1, UBE2G1, UBE2L3, UBE2O, UBE4B]	[AMFR, ANAPC1, ANAPC10, ANAPC11, ANAPC13, ANAPC2, ANAPC4, ANAPC5, ANAPC7, ANKIB1, ARIH1, ARIH2, ASB2, BARD1, BCL2, BFAR, BIRC2, BLMH, BRCA1, BTRC, C18orf25, CBFB, CBLB, CDC16, CDC23, CDC26, CDC27, CDC34, CDKN2A, CHFR, CUL1, CUL3, DDB2, DTL, DTX3L, DZIP3, ERCC8, FBXL4, FBXL8, FBXO2, FBXO22, FBXO3, FBXO31, FBXO4, FBXO6, FBXW11, FBXW7, FZR1, H3BMM0_HUMAN, HACE1, HAMP, HDAC6, HECTD2, HERC5, HERC6, HL…	TRUE
GO:0007034	GO_BiologicalProcess_18.04.2016_13h50	vacuolar transport	[5, 6]	[Group1]	17	5.74324	1.10045e-05	0.000649264	{Group1=1.1004477187080448E-5}	{Group1=2.2008954374160897E-5}	[ANKFY1, AP3D1, AP4M1, CLTCL1, DCLK1, EEA1, MAP2K2, MAPK1, PIKFYVE, RAB12, RAB21, RILP, RNF126, SMURF1, TRAPPC8, UBE2O, VPS53]	[ABCA1, ACTN2, ADRB2, AKR1B10, AKTIP, ALMS1, ALMS1P1, ALS2, ANKFY1, ANKRD27, ANKRD50, ANXA8, ANXA8L1, ANXA8L2, AP1AR, AP1G1, AP1M1, AP1S1, AP2A1, AP3B1, AP3D1, AP3M1, AP4M1, AP5B1, AP5M1, AP5S1, AP5Z1, ARF1, ARF1P1, ARFRP1, ARL1, ARL4C, ARSB, ATG14, BECN1, BECN2, BET1L, BLOC1S1, BLOC1S3, BLOC1S5, BLOC1S5-TXNDC5, BLOC1S6, BVES, CCL14, CD63, CDX2, CHMP1A, CHMP1B, CHMP2A, CHMP2B, CHMP3, CHMP4A, CHMP…	TRUE
GO:0016197	GO_BiologicalProcess_18.04.2016_13h50	endosomal transport	[6, 7]	[Group1]	15	5.55556	5.30756e-05	0.00302531	{Group1=1.1004477187080448E-5}	{Group1=2.2008954374160897E-5}	[ANKFY1, AP3D1, AP4M1, CLTCL1, DCLK1, EEA1, MAP2K2, MAPK1, PIKFYVE, RAB12, RAB21, RILP, RNF126, UBE2O, VPS53]	[ABCA1, ACTN2, ADRB2, AKR1B10, AKTIP, ALMS1, ALMS1P1, ALS2, ANKFY1, ANKRD27, ANKRD50, ANXA8, ANXA8L1, ANXA8L2, AP1AR, AP1G1, AP1M1, AP1S1, AP2A1, AP3D1, AP4M1, AP5B1, AP5M1, AP5S1, AP5Z1, ARF1, ARF1P1, ARFRP1, ARL1, ARL4C, ATG14, BECN1, BECN2, BET1L, BLOC1S1, BLOC1S3, BLOC1S5, BLOC1S5-TXNDC5, BLOC1S6, BVES, CCL14, CD63, CDX2, CHMP2A, CHMP2B, CHMP3, CHMP4A, CHMP4B, CHMP4C, CHMP5, CHMP6, CHMP7, CLT…	FALSE
GO:0016482	GO_BiologicalProcess_18.04.2016_13h50	cytosolic transport	[5]	[None]	30	4.12655	5.24697e-06	0.000314818	{None=NaN}	{None=NaN}	[ANKFY1, AP3D1, AP4M1, CEMIP, CLTCL1, DERL3, DIAPH1, EEA1, FZR1, JSRP1, MAP2K2, MAPK1, NUDT4, PIKFYVE, PIP5K1C, PLD2, RAB21, RANBP3, RILP, RNF126, SEPT5, SEPT9, SMOX, TBC1D20, UBE2L3, UBE2O, VPS53, XBP1, ZBTB17, ZDHHC8]	[AAAS, ABL1, ABLIM3, ACSL3, ACSM6, ACTL6A, ACTR2, ADCYAP1R1, ADGRL1, AGTR2, AKAP1, AKAP5, AKAP6, AKAP8L, AKR1B10, AKTIP, ANAPC2, ANGPT1, ANK2, ANKFY1, ANKRD27, ANP32B, ANXA13, AP1AR, AP1G1, AP1S1, AP2A1, AP3B1, AP3B2, AP3D1, AP3M1, AP3M2, AP3S1, AP3S2, AP4M1, APC2, APEX1, APOD, ARF1, ARF1P1, ARFRP1, ARIH2, ARL1, ASPH, ATG13, ATG5, ATP, ATP1A2, ATP2A2, ATP5IF1, AXIN1, AXIN2, BAG4, BAK1, BAMBI, BAP…	TRUE
GO:0019941	GO_BiologicalProcess_18.04.2016_13h50	modification-dependent protein catabolic process	[6, 7, 8]	[Group2]	26	4.29043	1.17293e-05	0.000680297	{Group2=4.2718538741790305E-6}	{Group2=1.2815561622537091E-5}	[ANAPC15, CDC34, CSNK1D, CSNK2A1, DERL1, DERL3, FBXL5, FBXO32, FZR1, JKAMP, LONP1, NSFL1C, PSMB5, PSMF1, RNF126, RNF24, SGTA, SMURF1, TBL1X, TRIB3, UBE2G1, UBE2L3, UBE4B, USP14, USP18, XBP1]	[2xCDC37, 2xCdc37, AKT1, AMER1, AMFR, ANAPC1, ANAPC10, ANAPC11, ANAPC15, ANAPC16, ANAPC2, ANAPC4, ANAPC5, ANAPC7, ANKIB1, ANKZF1, APC, ARAF, AREL1, ARIH1, ARIH2, ARNTL, ARRB1, ARRB2, ASB2, ATE1, ATM, ATRAID, ATXN3, ATXN8, AUP1, AURKA, AURKB, AXIN1, B4DEV8_HUMAN, BAG5, BAG6, BAP1, BBS7, BCAP31, BFAR, BIRC2, BTRC, BUB1, BUB1B, BUB3, C17orf97, C18orf25, ZSWIM9, C2orf40, CACUL1, CAV1, CAV3, CBFA2T3, …	FALSE
GO:0036503	GO_BiologicalProcess_18.04.2016_13h50	ERAD pathway	[3, 4, 5, 6]	[Group0]	7	7.86517	0.000734096	0.0367048	{Group0=7.340962704654344E-4}	{Group0=7.340962704654344E-4}	[DERL1, DERL3, JKAMP, SGTA, TMEM259, USP14, XBP1]	[AMFR, ANKZF1, ATXN3, ATXN8, AUP1, BAG6, BAG6 complex, BCAP31, BRSK2, CAV1, CCDC47, DERL1, DERL2, DERL3, DNAJB2, DNAJB9, DNAJC10, EDEM1, EDEM2, EDEM3, ERLEC1, ERLIN1, ERLIN2, FAF2, FBXO2, FBXO6, FOXRED2, GET4, HERPUD1, HM13, HSP90B1, HSPA5, JKAMP, ECPAS, MAN1B1, MARCH6, NFE2L2, NPLOC4, OS9, PRKN, PSMC1, PSMC2, PSMC3, PSMC4, PSMC5, PSMC6, RHBDD1, RNF103, RNF121, RNF139, RNF175, RNF185, RNF5, SDF2L…	FALSE
GO:0043161	GO_BiologicalProcess_18.04.2016_13h50	proteasome-mediated ubiquitin-dependent protein catabolic process	[6, 7, 8, 9, 10]	[Group2]	21	5.28967	3.704e-06	0.000225944	{Group2=4.2718538741790305E-6}	{Group2=1.2815561622537091E-5}	[ANAPC15, CDC34, CSNK1D, CSNK2A1, DERL1, DERL3, FBXL5, FZR1, JKAMP, NSFL1C, PSMB5, PSMF1, RNF126, RNF24, SGTA, SMURF1, TBL1X, TRIB3, UBE4B, USP14, XBP1]	[2xCDC37, 2xCdc37, AKT1, AMER1, AMFR, ANAPC1, ANAPC10, ANAPC11, ANAPC15, ANAPC16, ANAPC2, ANAPC4, ANAPC5, ANAPC7, ANKIB1, ANKZF1, APC, ARAF, ARIH1, ARIH2, ARNTL, ARRB1, ARRB2, ATM, ATRAID, ATXN3, ATXN8, AUP1, AURKA, AURKB, AXIN1, BAG5, BAG6, BBS7, BCAP31, BFAR, BIRC2, BTRC, BUB1, BUB1B, BUB3, C18orf25, ZSWIM9, C2orf40, CAV1, CBFA2T3, CCAR2, CCDC47, CCNB1, CCNF, CD2AP, CDC16, CDC20, CDC23, CDC26, …	TRUE
GO:0045022	GO_BiologicalProcess_18.04.2016_13h50	early endosome to late endosome transport	[5, 6, 7, 8]	[Group1]	5	13.8889	0.000313559	0.0169322	{Group1=1.1004477187080448E-5}	{Group1=2.2008954374160897E-5}	[EEA1, MAP2K2, MAPK1, RAB21, RILP]	[AKTIP, ANKRD27, DAB2, DNAJC13, EEA1, EMP2, EZR, FAM160A2, HOOK1, HOOK2, HOOK3, KIF16B, LMTK2, MAP2K1, MAP2K2, MAPK1, MAPK3, MSN, MTMR2, PIK3C3, PRICKLE1, PTPN23, RAB21, RAB5A, RAB7A, RDX, RILP, SNF8, SNX12, SNX16, SNX3, SRC, STX8, VPS11, WASH3P, phosphoinositide 3-kinase complex]	FALSE
GO:0045732	GO_BiologicalProcess_18.04.2016_13h50	positive regulation of protein catabolic process	[4, 5, 6, 7]	[Group2]	14	5.10949	0.000225357	0.0123946	{Group2=4.2718538741790305E-6}	{Group2=1.2815561622537091E-5}	[ANAPC15, CSNK1D, CSNK2A1, FBXL5, FURIN, FZR1, PSMB5, PSMF1, RILP, SGTA, SMURF1, TMEM259, TRIB3, XBP1]	[ADAM8, ADAM9, ADRA2A, AKT1, AMER1, ANAPC1, ANAPC10, ANAPC11, ANAPC15, ANAPC16, ANAPC2, ANAPC4, ANAPC5, ANAPC7, ANKIB1, APC, APC2, APOE, ARIH1, ARIH2, ASB9, ATG4B, ATG7, ATP5IF1, ATXN3, ATXN8, AURKA, AXIN1, BAG6, BARD1, BBS7, BCAP31, BTRC, BUB1B, BUB3, C4BPA, C4BPB, CAV1, CAV3, CBFA2T3, CCDC22, CCNB1, CD81, CDC16, CDC20, CDC23, CDC26, CDC27, CDK1, CDK5RAP3, CDKN1B, CEBPA, CHFR, CLU, CPAMD8, CREBR…	FALSE
GO:0070306	GO_BiologicalProcess_18.04.2016_13h50	lens fiber cell differentiation	[4, 6, 7, 8, 9, 10]	[None]	4	14.8148	0.000997878	0.048896	{None=NaN}	{None=NaN}	[EPHA2, FRS2, FZR1, TBC1D20]	[BFSP1, BFSP2, CRYGB, CRYGD, EPHA2, FOXE3, FRS2, FZR1, KDM5B, MAF, NF2, NTRK3, PITX3, PROX1, SIX3, SKIL, SLC7A11, SMAD3, TBC1D20, TDRD7, TGFB1, TMOD1, VIM, WNT5B, WNT7A, WNT7B, ZEB2]	TRUE
GO:1903069	GO_BiologicalProcess_18.04.2016_13h50	regulation of ER-associated ubiquitin-dependent protein catabolic process	[5, 6, 7, 8, 9, 10, 11, 12]	[Group0]	3	27.2727	0.000694298	0.0354092	{Group0=7.340962704654344E-4}	{Group0=7.340962704654344E-4}	[SGTA, USP14, XBP1]	[BCAP31, CAV1, HERPUD1, NFE2L2, SGTA, SVIP, UBQLN1, UBQLN2, USP14, XBP1, XBP1P1]	FALSE
GO:1904292	GO_BiologicalProcess_18.04.2016_13h50	regulation of ERAD pathway	[4, 5, 6, 7]	[Group0]	5	16.6667	0.000128664	0.0072052	{Group0=7.340962704654344E-4}	{Group0=7.340962704654344E-4}	[DERL3, SGTA, TMEM259, USP14, XBP1]	[ATXN3, ATXN8, BAG6, BCAP31, BRSK2, CAV1, DERL2, DERL3, EDEM1, EDEM2, ERLEC1, HERPUD1, NFE2L2, OS9, SGTA, SVIP, TMEM259, UBAC2, UBE2G2, UBE2J1, UBQLN1, UBQLN2, UBXN1, USP13, USP14, USP19, USP25, XBP1, XBP1P1, YOD1]	TRUE
GO analysis for lost repressed 4q-D4Z4 genes in FSHD1
GOID	Ontology Source	GOTerm	GOLevels	GOGroups	Nr. Genes	% Associated Genes	Term PValue	Term PValue Corrected with Bonferroni step down	Group PValue	Group PValue Corrected with Bonferroni step down	Associated Genes Found	All Associated Genes	OverViewTerm
GO:0001754	GO_BiologicalProcess_18.04.2016_13h50	eye photoreceptor cell differentiation	[6, 7, 8, 9, 10]	[None]	3	6.38298	0.0035804	0.0107412	{None=NaN}	{None=NaN}	[GNGT1, PROM1, SDK2]	[AGTPBP1, ALMS1, BBS4, BHLHE23, CABP4, CCDC66, CEP290, CRB1, DSCAM, FSCN2, GNAT1, GNAT2, GNGT1, HCN1, MAPRE2, MFRP, MYO7A, NAGLU, NKD1, NR2E3, NRL, NTRK2, OLFM3, PAX6, PDE6C, PPP2R3A, PRDM1, PRKCI, PROM1, PTN, RDH13, ROM1, RORB, RP1, RPGRIP1, SDK2, SOX8, SOX9, STAT3, STK19, TH, THY1, TOPORS, TRPM1, TTC8, TULP1, VEGFA]	TRUE
GO:0002720	GO_BiologicalProcess_18.04.2016_13h50	positive regulation of cytokine production involved in immune response	[4, 5, 6, 7]	[None]	3	8.82353	0.00140524	0.00562096	{None=NaN}	{None=NaN}	[AMH, FZD5, GATA3]	[AMH, B2M, BCL10, CD36, CD74, F2RL1, FCER1G, FFAR2, FFAR3, FZD5, GATA3, GPRC5B, HLA-A, MALT1, MAP3K7, MIF, NLRP3, NR4A3, PRKCZ, RSAD2, S100A8, S100A9, SASH3, SEMA7A, SPON2, TANK, TLR4, TNFRSF14, TNFSF4, TRAF2, TRAF6, TRIM6, WNT5A, XCL1]	TRUE
GO:0050922	GO_BiologicalProcess_18.04.2016_13h50	negative regulation of chemotaxis	[3, 4, 5, 6]	[None]	3	5.17241	0.00646853	0.0129371	{None=NaN}	{None=NaN}	[CYP19A1, ELANE, SEMA6B]	[AIF1, ANGPT2, C5, C5AR2, CCL2, CORO1B, CXCL13, CYP19A1, ELANE, GREM1, HRG, IDA:, KLRK1, MMP28, NBL1, NELL1, NOTCH1, NOV, NRG1, NRP1, PADI2, PLXNA1, PLXNA3, PTPN2, PTPRO, PTPRU, ROBO1, ROBO2, RPL10, RYK, SEMA3A, SEMA3B, SEMA3C, SEMA3D, SEMA3E, SEMA3F, SEMA3G, SEMA4A, SEMA4B, SEMA4C, SEMA4D, SEMA4F, SEMA4G, SEMA5A, SEMA5B, SEMA6A, SEMA6B, SEMA6C, SEMA6D, SEMA7A, SLIT2, ST6GAL1, STAP1, THBS1, UXT, …	TRUE
GO:0060415	GO_BiologicalProcess_18.04.2016_13h50	muscle tissue morphogenesis	[4, 5, 6, 7, 8]	[None]	3	4.41176	0.0100232	0.0100232	{None=NaN}	{None=NaN}	[MYH6, MYH7, TBX1]	[ACTC1, ANKRD1, BMP10, BMP2, CCM2L, COL11A1, COL3A1, DLL4, DSP, DSPP, EGLN1, FGFR2, FKBP1A, FOXC1, FOXC2, FOXH1, FZD1, FZD2, HAND1, HEG1, HEY2, ISL1, ISS:, MBD4, MED1, MYBPC3, MYF5, MYF6, MYH6, MYH7, MYL2, MYL3, MYLK, MYLK2, NKX2-5, NKX2-5 dimer, NOTCH1, NRG1, PAX7, PITX2, PKP2, POU4F1, PROX1, PTCD2, RBPJ, RXRA, RYR2, S1PR1, SHOX2, SIRT6, SMAD7, TBX1, TBX20, TCAP, TGFBR3, TNNC1, TNNI1, TNNI3, TNN…	TRUE
GO:1902475	GO_BiologicalProcess_18.04.2016_13h50	L-alpha-amino acid transmembrane transport	[7, 8, 9, 10, 11]	[None]	3	9.67742	0.00107072	0.00535358	{None=NaN}	{None=NaN}	[SLC43A2, SLC7A4, SLC7A7]	[PQLC2, SLC13A3, SLC17A6, SLC17A7, SLC17A8, SLC1A1, SLC1A2, SLC1A3, SLC1A6, SLC1A7, SLC25A12, SLC25A13, SLC25A15, SLC25A2, SLC25A22, SLC38A1, SLC38A3, SLC38A7, SLC43A1, SLC43A2, SLC7A1, SLC7A11, SLC7A13, SLC7A14, SLC7A2, SLC7A3, SLC7A4, SLC7A5, SLC7A6, SLC7A7, SLC7A8]	TRUE

## Sheet: GO for 10q altered genes
GO analysis for lost activated 10q-D4Z4 genes in FSHD1
GOID	Ontology Source	GOTerm	GOLevels	GOGroups	Nr. Genes	% Associated Genes	Term PValue	Term PValue Corrected with Bonferroni step down	Group PValue	Group PValue Corrected with Bonferroni step down	Associated Genes Found	All Associated Genes	OverViewTerm
GO:0006582	GO_BiologicalProcess-EBI-QuickGO-GOA_15.03.2018_00h00	melanin metabolic process	[3, 5]	[Group3]	4	19.0476	0.000122054	0.00805557	{Group3=5.816271778599908E-4}	{Group3=5.816271778599908E-4}	[CTNS, PARD3, WNT5A, ZEB2]	[ASIP, BCL2, CDH15, CDH3, CITED1, CTNS, DCT, DDT, MYO5A, OCA2, PARD3, PMEL, RAPGEF2, SLC24A5, SLC45A2, TRPC1, TYR, TYRP1, VHLL, WNT5A, ZEB2]	FALSE
GO:0010799	GO_BiologicalProcess-EBI-QuickGO-GOA_15.03.2018_00h00	regulation of peptidyl-threonine phosphorylation	[7, 8, 9, 10]	[Group2]	5	11.9048	0.000173185	0.0110839	{Group2=6.4846117338175204E-6}	{Group2=2.5938446935270082E-5}	[CAB39, DGKQ, PARD3, PRKAG2, WNT5A]	[APP, AXIN1, AZU1, BMP7, CAB39, CALM1, CALM2, CALM3, CEMIP, CHI3L1, DDIT4, DGKQ, DMTN, EGF, EIF4G1, GCG, GSK3A, INPP5K, IRGM, MAPK1, PARD3, PLK1, PPEF2, PRKAG2, RIPK2, RPTOR, S1PR2, SIRT2, SMAD7, SPHK1, SPRED1, SPRED2, SPRY2, STOX1, TGFB1, TNKS1BP1, TRIM6, TRPC5, TRPC6, UBE2K, WNK3, WNT5A]	FALSE
GO:0018107	GO_BiologicalProcess-EBI-QuickGO-GOA_15.03.2018_00h00	peptidyl-threonine phosphorylation	[7, 8, 9]	[Group2]	9	7.31707	2.49832e-05	0.00169886	{Group2=6.4846117338175204E-6}	{Group2=2.5938446935270082E-5}	[CAB39, CAMKK1, DGKQ, DYRK1A, PARD3, PRKAG2, PRKCD, TNKS, WNT5A]	[ACOD1, ACVR1, ACVR1B, AKT1, APP, AXIN1, AZU1, BCL2, BMP7, CAB39, CAD, CALM1, CALM2, CALM3, CAMK1, CAMK1D, CAMK1G, CAMK2A, CAMK2B, CAMK2D, CAMK2G, CAMKK1, CAMKK2, CAMKV, CDK1, CDK5, CDK5R1, CEMIP, CHEK1, CHEK2, CHI3L1, CLK1, COLEC11, COQ7, CSNK2A1, CSNK2A2, CSNK2B, DAPK2, DAPK3, DCAF1, DCLK1, DCLK2, DCLK3, DDIT4, DFFB, DGKQ, DMTN, DYRK1A, EGF, EIF4G1, GCG, GPI, GRK2, GSK3A, GSK3B, HASPIN, HIPK2, …	FALSE
GO:0018210	GO_BiologicalProcess-EBI-QuickGO-GOA_15.03.2018_00h00	peptidyl-threonine modification	[7, 8]	[Group2]	10	7.57576	6.48461e-06	0.000447438	{Group2=6.4846117338175204E-6}	{Group2=2.5938446935270082E-5}	[CAB39, CAMKK1, DGKQ, DYRK1A, GALNT2, PARD3, PRKAG2, PRKCD, TNKS, WNT5A]	[ACOD1, ACVR1, ACVR1B, AKT1, APP, AXIN1, AZU1, BCL2, BMP7, CAB39, CAD, CALM1, CALM2, CALM3, CAMK1, CAMK1D, CAMK1G, CAMK2A, CAMK2B, CAMK2D, CAMK2G, CAMKK1, CAMKK2, CAMKV, CDK1, CDK5, CDK5R1, CEMIP, CHEK1, CHEK2, CHI3L1, CLK1, COLEC11, COQ7, CSNK2A1, CSNK2A2, CSNK2B, DAPK2, DAPK3, DCAF1, DCLK1, DCLK2, DCLK3, DDIT4, DFFB, DGKQ, DMTN, DYRK1A, EGF, EIF4G1, GALNT1, GALNT11, GALNT13, GALNT15, GALNT16, G…	TRUE
GO:0031167	GO_BiologicalProcess-EBI-QuickGO-GOA_15.03.2018_00h00	rRNA methylation	[5, 6, 7, 8, 9, 10, 11]	[Group0]	4	15.3846	0.00029025	0.0182858	{Group0=2.9025041884084686E-4}	{Group0=8.707512565225405E-4}	[BMT2, METTL16, MRM1, MRM3]	[BMT2, BUD23, DIMT1, EMG1, FBL, FBLL1, FTSJ3, METTL15, METTL15P1, METTL16, MRM1, MRM2, MRM3, MTERF4, NOP2, NSUN3, NSUN4, NSUN5, NSUN5P1, NSUN5P2, RRNAD1, TARBP1, TFB1M, TFB2M, TRMT112, TRMT61B]	TRUE
GO:0042438	GO_BiologicalProcess-EBI-QuickGO-GOA_15.03.2018_00h00	melanin biosynthetic process	[4, 6]	[Group3]	4	21.0526	8.0617e-05	0.00540134	{Group3=5.816271778599908E-4}	{Group3=5.816271778599908E-4}	[CTNS, PARD3, WNT5A, ZEB2]	[ASIP, CDH15, CDH3, CITED1, CTNS, DCT, DDT, MYO5A, OCA2, PARD3, PMEL, RAPGEF2, SLC24A5, SLC45A2, TRPC1, TYR, TYRP1, WNT5A, ZEB2]	TRUE
GO:0044550	GO_BiologicalProcess-EBI-QuickGO-GOA_15.03.2018_00h00	secondary metabolite biosynthetic process	[3]	[Group3]	4	13.7931	0.000447734	0.026864	{Group3=5.816271778599908E-4}	{Group3=5.816271778599908E-4}	[CTNS, PARD3, WNT5A, ZEB2]	[ASIP, BDH2, CBS, CDH15, CDH3, CITED1, CTH, CTNS, CYP1A2, DAND5, DCT, DDT, KMO, MPST, MYO5A, OCA2, PARD3, PMEL, PSG1, RAPGEF2, SLC24A5, SLC45A2, SP1, TRPC1, TYR, TYRP1, VSIG2, WNT5A, ZEB2]	FALSE
GO:0048021	GO_BiologicalProcess-EBI-QuickGO-GOA_15.03.2018_00h00	regulation of melanin biosynthetic process	[5, 6, 7]	[Group3]	3	33.3333	0.000154798	0.0100619	{Group3=5.816271778599908E-4}	{Group3=5.816271778599908E-4}	[PARD3, WNT5A, ZEB2]	[ASIP, CDH15, CDH3, PARD3, RAPGEF2, SLC24A5, TYRP1, WNT5A, ZEB2]	FALSE
GO:1900363	GO_BiologicalProcess-EBI-QuickGO-GOA_15.03.2018_00h00	regulation of mRNA polyadenylation	[7, 8, 9, 10, 11]	[Group1]	3	27.2727	0.000298469	0.0185051	{Group1=2.984694176502977E-4}	{Group1=5.969388353005954E-4}	[CPEB3, HSF1, RNF20]	[CCNT1, CDK9, CPEB3, CTR9, HSF1, NELFE, RNF20, RNF40, SNRPA, SUPT5H, ZC3H14]	TRUE
GO:1900376	GO_BiologicalProcess-EBI-QuickGO-GOA_15.03.2018_00h00	regulation of secondary metabolite biosynthetic process	[4, 5]	[Group3]	3	25	0.000394282	0.0240512	{Group3=5.816271778599908E-4}	{Group3=5.816271778599908E-4}	[PARD3, WNT5A, ZEB2]	[ASIP, CDH15, CDH3, DAND5, PARD3, PSG1, RAPGEF2, SLC24A5, SP1, TYRP1, WNT5A, ZEB2]	FALSE
GO analysis for lost repressed 10q-D4Z4 genes in FSHD1
GOID	Ontology Source	GOTerm	GOLevels	GOGroups	Nr. Genes	% Associated Genes	Term PValue	Term PValue Corrected with Bonferroni step down	Group PValue	Group PValue Corrected with Bonferroni step down	Associated Genes Found	All Associated Genes	OverViewTerm
GO:0003208	GO_BiologicalProcess-EBI-QuickGO-GOA_15.03.2018_00h00	cardiac ventricle morphogenesis	[4, 5, 6, 7, 8, 9]	[Group0]	3	4.05405	0.00486365	0.0097273	{Group0=0.004863650017263915}	{Group0=0.00972730003452783}	[SMARCD3, TNNI1, TNNT2]	[BMP10, BMPR1A, CCM2L, CHD7, COL11A1, CPE, DLL4, DSP, DSPP, ENG, FGFR2, FKBP1A, FOXC1, FOXC2, FOXF1, FOXH1, GATA3, GATA4, GRHL2, GSK3A, HAND1, HAND2, HEG1, HEY1, HEY2, HEYL, HIF1A, ISL1, JAG1, LRP2, MBD4, MED1, MEF2C, MESP1, MYBPC3, MYH6, MYH7, MYL2, MYL3, NKX2-5, NOG, NOTCH1, NPY2R, NPY5R, NRG1, PKP2, POU4F1, PPP1R13L, PROX1, PTCD2, RBPJ, RXRA, RYR2, SEMA3C, SFRP2, SMAD4, SMAD7, SMARCD3, SOX11, …	TRUE
GO:0010828	GO_BiologicalProcess-EBI-QuickGO-GOA_15.03.2018_00h00	positive regulation of glucose transmembrane transport	[4, 5, 6, 7, 9, 10, 11]	[Group1]	3	5.66038	0.00188396	0.00565188	{Group1=0.0018839612905076778}	{Group1=0.005651883871523033}	[AGT, C1QTNF2, NR4A3]	[ADIPOQ, ADIPOR2, AGT, AGXT, AKT1, AKT2, ARPP19, C1QTNF1, C1QTNF12, C1QTNF2, C2CD5, C3, CAPN10, CLIP3, CLTCL1, CREBL2, FFAR3, FGF19, FGF21, GIP, GNAI2, GPC3, IGF1, INS, INSR, IRS1, IRS2, ITLN1, LOC110117498-PIK3R3, MAPK14, MED12, NFE2L2, NR1H4, NR4A3, OPA1, OSBPL8, PAK1, PIK3R1, PIK3R2, PIK3R3, PKN1, PRKCI, PRKCZ, PTH, PTPN11, PTRH2, RAP1A, RARRES2, RHOQ, RNASEL, SLC1A2, SORBS1, TERT]	TRUE
GO:0050764	GO_BiologicalProcess-EBI-QuickGO-GOA_15.03.2018_00h00	regulation of phagocytosis	[5, 6, 7]	[Group2]	3	4.05405	0.00486365	0.0097273	{Group2=0.004863650017263915}	{Group2=0.00972730003452783}	[ABR, CAMK1D, SCARB1]	[ABCA7, ABR, ADIPOQ, AHSG, ALOX15, ANO6, ATG3, ATG5, AZU1, BCR, C2, C3, C4A, C4B, C4BPA, C4BPB, CALR, CAMK1D, CCL2, CD300A, CD300LF, CD36, CD47, CNN2, CSK, CYBA, DNM2, DOCK2, F2RL1, FCER1G, FCGR2B, FGR, GAS6, GATA2, HCK, HMGB1, HNRNPC, IL1B, ITGA2, ITGAV, LMAN2, MBL2, MERTK, MFGE8, MYO18A, NCKAP1L, PITX3, PPARG, PRKCG, PRTN3, PTEN, PTX3, PYCARD, RAB27A, RACK1, RAP1A, RAPGEF1, RN7SL263P, SCARB1, S…	TRUE
GO:1903725	GO_BiologicalProcess-EBI-QuickGO-GOA_15.03.2018_00h00	regulation of phospholipid metabolic process	[5, 6, 7]	[Group3]	3	4	0.00504962	0.00504962	{Group3=0.005049618329554474}	{Group3=0.005049618329554474}	[FGFR3, NR4A3, SCARB1]	[ACSL3, ADGRF5, AMBRA1, APOC1, APOC2, APP, ARF1, ARF1P1, ATG14, CCKBR, CCL19, CCL21, CCR7, CD81, CDC42, CHRM5, DAB2IP, EPHA8, ERBB4, FABP3, FGF13, FGF2, FGFR3, FGR, FLT1, FLT3, HTR2A, HTR2B, HTR2C, IDH1, IRS1, KIT, KLF4, LDLR, LOC110117498-PIK3R3, LPCAT1, LYN, NOD2, NR1H4, NR4A3, PDGFA, PDGFB, PDGFRA, PDGFRB, PIK3IP1, PIK3R1, PIK3R2, PIK3R3, PIK3R4, PIK3R5, PIK3R6, PRKCD, PRKD1, PTK2, PTK2B, RNU1…	TRUE

## Sheet: GSEA Datasets
Dataset of unloading disuse muscle atrophy (GSE21496) - Gene set lost-activated genes								Dataset of unloading disuse muscle atrophy (GSE21496) - Gene set lost-repressed genes								Dataset of muscle hypertrophy induced by heat-stress (GSE12474) - Gene set lost-activated genes								Dataset of muscle hypertrophy induced by heat-stress (GSE12474) - Gene set lost-repressed genes
Probe	Gene symbol	Gene title	Rank in gene list	Rank metric score	Running ES	Core enrichment		Probe	Gene symbol	Gene title	Rank in gene list	Rank metric score	Running ES	Core enrichment		Probe	Gene symbol	Gene title	Rank in gene list	Rank metric score	Running ES	Core enrichment		Probe	Gene symbol	Gene title	Rank in gene list	Rank metric score	Running ES	Core enrichment
FBXO32	FBXO32	F-box protein 32	158	0.113278	0.0205342	Yes		MECOM	null	null	90	0.134742	0.104912	Yes		NDC80	null	null	232	0.214913	0.0107916	No		SHD	SHD	Src homology 2 domain containing transforming protein D	894	0.140599	-0.0016685	No
KCNQ5	KCNQ5	potassium voltage-gated channel, KQT-like subfamily, member 5	378	0.0856998	0.0308834	Yes		MATN2	MATN2	matrilin 2	138	0.117165	0.197757	Yes		SEC14L1	SEC14L1	SEC14-like 1 (S. cerevisiae)	607	0.161048	0.00844323	No		PCDHGA1	PCDHGA1	protocadherin gamma subfamily A, 1	1330	0.120867	0.0141654	No
UBE2G1	UBE2G1	ubiquitin-conjugating enzyme E2G 1 (UBC7 homolog, yeast)	586	0.0726171	0.0385353	Yes		GATA3	GATA3	GATA binding protein 3	982	0.056318	0.19991	Yes		METTL23	null	null	679	0.155654	0.0213181	No		P2RX5	P2RX5	purinergic receptor P2X, ligand-gated ion channel, 5	1396	0.118309	0.0483435	No
SASH1	SASH1	SAM and SH3 domain containing 1	606	0.0718039	0.0557825	Yes		FZD5	FZD5	frizzled homolog 5 (Drosophila)	983	0.0563059	0.245698	Yes		JKAMP	null	null	1273	0.123021	0.00350186	No		ITGAE	ITGAE	integrin, alpha E (antigen CD103, human mucosal lymphocyte antigen 1; alpha polypeptide)	1936	0.102912	0.0530951	No
SEC14L1	SEC14L1	SEC14-like 1 (S. cerevisiae)	881	0.0595847	0.056631	Yes		ART3	ART3	ADP-ribosyltransferase 3	1446	0.0463816	0.259496	Yes		NDUFA2	NDUFA2	NADH dehydrogenase (ubiquinone) 1 alpha subcomplex, 2, 8kDa	1338	0.120485	0.0129963	No		ART3	ART3	ADP-ribosyltransferase 3	1998	0.101245	0.0820654	No
CTNS	CTNS	cystinosis, nephropathic	933	0.0580535	0.0687173	Yes		P2RX6	null	null	1597	0.0436524	0.287228	Yes		ADK	ADK	adenosine kinase	1353	0.119806	0.0250253	No		SLC7A7	SLC7A7	solute carrier family 7 (cationic amino acid transporter, y+ system), member 7	2459	0.0907472	0.0870469	No
RUFY3	RUFY3	RUN and FYVE domain containing 3	958	0.057342	0.0820305	Yes		SLC43A2	SLC43A2	solute carrier family 43, member 2	2255	0.0351386	0.281788	No		NARF	NARF	nuclear prelamin A recognition factor	1459	0.115967	0.0319009	No		SPEF1	null	null	2514	0.0896124	0.112688	No
OSBP	OSBP	oxysterol binding protein	1041	0.0545762	0.0916173	Yes		SHC2	SHC2	SHC (Src homology 2 domain containing) transforming protein 2	3490	0.0241912	0.237572	No		ADAM12	ADAM12	ADAM metallopeptidase domain 12 (meltrin alpha)	1477	0.115487	0.0433136	No		CYP46A1	CYP46A1	cytochrome P450, family 46, subfamily A, polypeptide 1	2763	0.0852657	0.126906	No
MTDH	MTDH	metadherin	1046	0.0544566	0.10524	Yes		CROCC	CROCC	ciliary rootlet coiled-coil, rootletin	3753	0.0223653	0.242195	No		DUS1L	DUS1L	dihydrouridine synthase 1-like (S. cerevisiae)	1951	0.102435	0.0295614	No		ATP4B	ATP4B	ATPase, H+/K+ exchanging, beta polypeptide	4048	0.0647855	0.0809879	No
NUMA1	NUMA1	nuclear mitotic apparatus protein 1	1119	0.0527738	0.114891	Yes		RTN4RL1	RTN4RL1	reticulon 4 receptor-like 1	3831	0.0217148	0.255866	No		LPPR3	null	null	2047	0.0999732	0.0352552	No		CECR1	ADA2	cat eye syndrome chromosome region, candidate 1	4303	0.0612599	0.0872773	No
TRMT6	null	null	1178	0.0516081	0.124975	Yes		CXCL16	CXCL16	chemokine (C-X-C motif) ligand 16	3965	0.0209204	0.265993	No		LRRC8B	LRRC8B	leucine rich repeat containing 8 family, member B	2095	0.0989543	0.043343	No		PRODH	PRODH	proline dehydrogenase (oxidase) 1	4609	0.0572657	0.0896588	No
SF3A2	SF3A2	splicing factor 3a, subunit 2, 66kDa	1201	0.0512038	0.136834	Yes		CECR1	ADA2	cat eye syndrome chromosome region, candidate 1	6290	0.00949898	0.153396	No		LAMTOR4	null	null	2302	0.0943559	0.0426512	No		MECOM	null	null	4621	0.0570935	0.107207	No
SAFB2	SAFB2	scaffold attachment factor B2	1222	0.0507156	0.148672	Yes		NHS	NHS	Nance-Horan syndrome (congenital cataracts and dental anomalies)	6705	0.00780723	0.138311	No		ATP5C1	ATP5F1C	ATP synthase, H+ transporting, mitochondrial F1 complex, gamma polypeptide 1	2467	0.0905147	0.0437402	No		ANXA13	ANXA13	annexin A13	4715	0.0559738	0.120154	No
LAMTOR4	null	null	1294	0.0491201	0.157447	Yes		RPH3AL	RPH3AL	rabphilin 3A-like (without C2 domains)	7407	0.00525872	0.106295	No		ARHGAP18	ARHGAP18	Rho GTPase activating protein 18	2508	0.0897554	0.0512133	No		SHC2	SHC2	SHC (Src homology 2 domain containing) transforming protein 2	5843	0.0432816	0.0755407	No
RAB31	RAB31	RAB31, member RAS oncogene family	1300	0.0490411	0.169642	Yes		SDK2	SDK2	sidekick homolog 2 (chicken)	7637	0.00440365	0.0980195	No		LAPTM4B	LAPTM4B	lysosomal associated protein transmembrane 4 beta	2848	0.0836729	0.0424496	No		CYP19A1	CYP19A1	cytochrome P450, family 19, subfamily A, polypeptide 1	6760	0.0339124	0.038878	No
FCHSD2	FCHSD2	FCH and double SH3 domains 2	1453	0.0462065	0.173454	Yes		SLC4A11	SLC4A11	solute carrier family 4, sodium bicarbonate transporter-like, member 11	8268	0.00204376	0.0670644	No		TRMT6	null	null	2899	0.082729	0.0486531	No		RAX2	null	null	6848	0.0332018	0.0449098	No
LAMA2	LAMA2	laminin, alpha 2 (merosin, congenital muscular dystrophy)	1517	0.044857	0.181562	Yes		ANXA13	ANXA13	annexin A13	8548	0.00112076	0.053531	No		SBNO2	SBNO2	strawberry notch homolog 2 (Drosophila)	3029	0.0804254	0.0504923	No		AMH	AMH	anti-Mullerian hormone	7376	0.0284769	0.026662	No
ARPC1A	ARPC1A	actin related protein 2/3 complex, subunit 1A, 41kDa	1543	0.0444605	0.191552	Yes		LSR	LSR	lipolysis stimulated lipoprotein receptor	9108	-0.000667812	0.0251329	No		OGFOD3	null	null	3078	0.079517	0.056458	No		UNC13D	UNC13D	unc-13 homolog D (C. elegans)	7449	0.0279118	0.0317917	No
ENOSF1	ENOSF1	enolase superfamily member 1	1595	0.0436742	0.199986	Yes		ITGAE	ITGAE	integrin, alpha E (antigen CD103, human mucosal lymphocyte antigen 1; alpha polypeptide)	9136	-0.000752181	0.0243467	No		BID	BID	BH3 interacting domain death agonist	3166	0.0781335	0.060243	No		DIRAS1	DIRAS1	DIRAS family, GTP-binding RAS-like 1	7683	0.0257168	0.0278893	No
SIRPA	SIRPA	signal-regulatory protein alpha	1638	0.0428245	0.208673	Yes		DIRAS1	DIRAS1	DIRAS family, GTP-binding RAS-like 1	9521	-0.00206798	0.00614741	No		KCNQ5	KCNQ5	potassium voltage-gated channel, KQT-like subfamily, member 5	3268	0.0765043	0.0631246	No		CEBPE	CEBPE	CCAAT/enhancer binding protein (C/EBP), epsilon	8304	0.0205335	0.00230587	No
ANTXR2	ANTXR2	anthrax toxin receptor 2	1659	0.0425727	0.218444	Yes		PCDHGA1	PCDHGA1	protocadherin gamma subfamily A, 1	9862	-0.00316134	-0.0088847	No		JSRP1	JSRP1	junctional sarcoplasmic reticulum protein 1	3322	0.0756876	0.0684218	No		RPH3AL	RPH3AL	rabphilin 3A-like (without C2 domains)	8624	0.0178952	-0.00853105	No
RNMTL1	MRM3	RNA methyltransferase like 1	1684	0.0420348	0.227869	Yes		LZTS3	null	null	10472	-0.00510157	-0.036266	No		MAPK1	MAPK1	mitogen-activated protein kinase 1	3620	0.0710948	0.0605083	No		TBX1	TBX1	T-box 1	8859	0.015874	-0.0156086	No
IQGAP1	IQGAP1	IQ motif containing GTPase activating protein 1	1710	0.0416855	0.237153	Yes		ATP4B	ATP4B	ATPase, H+/K+ exchanging, beta polypeptide	10605	-0.00555209	-0.0385851	No		FAM64A	PIMREG	family with sequence similarity 64, member A	3671	0.0703844	0.0653971	No		ELANE	null	null	9243	0.012622	-0.0314324	No
GEMIN4	GEMIN4	gem (nuclear organelle) associated protein 4	1733	0.0413636	0.246513	Yes		CCNJL	CCNJL	cyclin J-like	11421	-0.00821373	-0.0741009	No		POLR2E	POLR2E	polymerase (RNA) II (DNA directed) polypeptide E, 25kDa	4082	0.0642638	0.0508645	No		UTS2R	UTS2R	urotensin 2 receptor	9565	0.0101912	-0.0448176	No
ANKFY1	ANKFY1	ankyrin repeat and FYVE domain containing 1	1740	0.0412307	0.256672	Yes		CEBPE	CEBPE	CCAAT/enhancer binding protein (C/EBP), epsilon	12217	-0.0110357	-0.106286	No		TSC22D4	TSC22D4	TSC22 domain family, member 4	4200	0.0624961	0.0514201	No		PRLR	PRLR	prolactin receptor	9691	0.0091434	-0.0483877	No
WDR45B	null	null	1749	0.0411192	0.266699	Yes		UNC13D	UNC13D	unc-13 homolog D (C. elegans)	13069	-0.013971	-0.138984	No		TXNRD2	TXNRD2	thioredoxin reductase 2	4263	0.0616797	0.0547562	No		SLC4A11	SLC4A11	solute carrier family 4, sodium bicarbonate transporter-like, member 11	10185	0.00497352	-0.0723337	No
CHD8	CHD8	chromodomain helicase DNA binding protein 8	1863	0.0395672	0.270857	Yes		PRLR	PRLR	prolactin receptor	13286	-0.0147643	-0.138161	No		MAPK6	MAPK6	mitogen-activated protein kinase 6	4504	0.0587562	0.0485005	No		SDK2	SDK2	sidekick homolog 2 (chicken)	10236	0.00440243	-0.0735253	No
RAB12	RAB12	RAB12, member RAS oncogene family	1949	0.038693	0.276253	Yes		SHD	SHD	Src homology 2 domain containing transforming protein D	13474	-0.0154349	-0.135291	No		PSMF1	PSMF1	proteasome (prosome, macropain) inhibitor subunit 1 (PI31)	4953	0.0529807	0.0307851	No		SLC43A2	SLC43A2	solute carrier family 43, member 2	10539	0.00204097	-0.0885131	No
MAPK6	MAPK6	mitogen-activated protein kinase 6	2082	0.0370975	0.278794	Yes		SPNS2	null	null	13601	-0.0158857	-0.128896	No		LAMA2	LAMA2	laminin, alpha 2 (merosin, congenital muscular dystrophy)	4978	0.0526512	0.035141	No		CCNJL	CCNJL	cyclin J-like	12224	-0.0134131	-0.171443	No
PTPRS	PTPRS	protein tyrosine phosphatase, receptor type, S	2100	0.0369078	0.287282	Yes		ELANE	null	null	14132	-0.0178608	-0.141812	No		USP14	USP14	ubiquitin specific peptidase 14 (tRNA-guanine transglycosylase)	5067	0.0515856	0.0360466	No		P2RX6	null	null	13151	-0.0225003	-0.212245	No
FAH	FAH	fumarylacetoacetate hydrolase (fumarylacetoacetase)	2152	0.0363092	0.293845	Yes		GNG7	GNG7	guanine nucleotide binding protein (G protein), gamma 7	14532	-0.0195767	-0.146549	No		CHRNE	CHRNE	cholinergic receptor, nicotinic, epsilon	5131	0.0509297	0.0381858	No		ABR	ABR	active BCR-related gene	13388	-0.0249788	-0.216537	No
ARHGAP18	ARHGAP18	Rho GTPase activating protein 18	2190	0.035994	0.301058	Yes		SPEF1	null	null	14678	-0.0201732	-0.137652	No		RHBDF2	RHBDF2	rhomboid 5 homolog 2 (Drosophila)	5163	0.0505252	0.0419503	No		C1QTNF2	C1QTNF2	C1q and tumor necrosis factor related protein 2	13408	-0.0252485	-0.209508	No
RALBP1	RALBP1	ralA binding protein 1	2214	0.0357005	0.308927	Yes		IL16	IL16	interleukin 16 (lymphocyte chemoattractant factor)	14886	-0.0209843	-0.131304	No		RNF126	RNF126	ring finger protein 126	5233	0.0497469	0.0436507	No		CXCL16	CXCL16	chemokine (C-X-C motif) ligand 16	13680	-0.0279831	-0.214659	No
CFD	CFD	complement factor D (adipsin)	2222	0.0355635	0.317595	Yes		TBX1	TBX1	T-box 1	14950	-0.0212345	-0.117298	No		TRIB3	TRIB3	tribbles homolog 3 (Drosophila)	5471	0.0471749	0.036318	No		SPNS2	null	null	14298	-0.0355328	-0.235327	No
WDR81	WDR81	WD repeat domain 81	2286	0.0348498	0.323162	Yes		AMH	AMH	anti-Mullerian hormone	15096	-0.0219472	-0.106958	No		NLRP1	null	null	5634	0.0453206	0.0326982	No		ITGA11	ITGA11	integrin, alpha 11	14394	-0.0369074	-0.228533	No
KIF1C	KIF1C	kinesin family member 1C	2289	0.034832	0.331905	Yes		GAL3ST4	GAL3ST4	galactose-3-O-sulfotransferase 4	15164	-0.0222459	-0.0923364	No		RUFY3	RUFY3	RUN and FYVE domain containing 3	5780	0.0438825	0.0298116	No		GAL3ST4	GAL3ST4	galactose-3-O-sulfotransferase 4	14403	-0.0370393	-0.217194	No
AP4M1	AP4M1	adaptor-related protein complex 4, mu 1 subunit	2362	0.0340582	0.336802	Yes		P2RX5	P2RX5	purinergic receptor P2X, ligand-gated ion channel, 5	15629	-0.0244713	-0.0964591	No		OXA1L	OXA1L	oxidase (cytochrome c) assembly 1-like	5797	0.0437684	0.0336386	No		GNG7	GNG7	guanine nucleotide binding protein (G protein), gamma 7	14604	-0.0392786	-0.215084	No
KIDINS220	KIDINS220	-	2411	0.0335885	0.34283	Yes		RAX2	null	null	15643	-0.0245567	-0.0771627	No		BCR	BCR	breakpoint cluster region	5820	0.043484	0.0371225	No		IL16	IL16	interleukin 16 (lymphocyte chemoattractant factor)	15429	-0.0499714	-0.241888	No
OGFOD3	null	null	2412	0.0335761	0.351359	Yes		ITGA11	ITGA11	integrin, alpha 11	15954	-0.0259716	-0.0720924	No		MED16	null	null	5852	0.0432025	0.0401071	No		CROCC	CROCC	ciliary rootlet coiled-coil, rootletin	17407	-0.089436	-0.315862	Yes
PPP4R1	PPP4R1	protein phosphatase 4, regulatory subunit 1	2465	0.0330105	0.357032	Yes		SLC7A7	SLC7A7	solute carrier family 7 (cationic amino acid transporter, y+ system), member 7	16761	-0.0304277	-0.0890779	No		PPP4R1	PPP4R1	protein phosphatase 4, regulatory subunit 1	5887	0.0427972	0.0428922	No		NHS	NHS	Nance-Horan syndrome (congenital cataracts and dental anomalies)	17959	-0.110499	-0.309324	Yes
MB21D2	null	null	2500	0.0326191	0.363544	Yes		CYP19A1	CYP19A1	cytochrome P450, family 19, subfamily A, polypeptide 1	17092	-0.0325002	-0.0797339	No		PLIN3	null	null	5932	0.042268	0.0450996	No		RTN4RL1	RTN4RL1	reticulon 4 receptor-like 1	18204	-0.121252	-0.28348	Yes
TRAPPC8	null	null	2559	0.0320812	0.368669	Yes		CYP46A1	CYP46A1	cytochrome P450, family 46, subfamily A, polypeptide 1	17494	-0.0356308	-0.0715202	No		ZNF555	ZNF555	zinc finger protein 555	6070	0.0407113	0.0422923	No		LZTS3	null	null	18271	-0.125255	-0.247149	Yes
BCR	BCR	breakpoint cluster region	2568	0.0320372	0.376389	Yes		UTS2R	UTS2R	urotensin 2 receptor	18291	-0.0445345	-0.0765163	No		RNMTL1	MRM3	RNA methyltransferase like 1	6345	0.0380082	0.0320543	No		FZD5	FZD5	frizzled homolog 5 (Drosophila)	18850	-0.175349	-0.22143	Yes
SPEN	SPEN	spen homolog, transcriptional regulator (Drosophila)	2576	0.0319805	0.384147	Yes		ABR	ABR	active BCR-related gene	18471	-0.0476961	-0.0469974	No		ZNF710	ZNF710	zinc finger protein 710	6372	0.0376534	0.0347087	No		GATA3	GATA3	GATA binding protein 3	18881	-0.179613	-0.165986	Yes
FURIN	FURIN	furin (paired basic amino acid cleaving enzyme)	2684	0.0310085	0.386444	Yes		C1QTNF2	C1QTNF2	C1q and tumor necrosis factor related protein 2	18755	-0.0540014	-0.0177354	No		TBC1D20	TBC1D20	TBC1 domain family, member 20	6513	0.0362095	0.0312656	No		LSR	LSR	lipolysis stimulated lipoprotein receptor	19016	-0.207368	-0.107118	Yes
ARID3A	ARID3A	AT rich interactive domain 3A (BRIGHT- like)	2782	0.0299793	0.389001	Yes		PRODH	PRODH	proline dehydrogenase (oxidase) 1	18931	-0.0602639	0.0222108	No		NCLN	NCLN	nicalin homolog (zebrafish)	6631	0.0352432	0.0289188	No		MATN2	MATN2	matrilin 2	19306	-0.393518	0.00279565	Yes
SCFD2	SCFD2	sec1 family domain containing 2	2795	0.0298554	0.395959	Yes										NSFL1C	NSFL1C	NSFL1 (p97) cofactor (p47)	6852	0.0331613	0.0209801	No
GPCPD1	null	null	2990	0.0280765	0.392975	Yes										SCFD2	SCFD2	sec1 family domain containing 2	7099	0.0308149	0.011436	No
MACF1	MACF1	microtubule-actin crosslinking factor 1	3082	0.0272473	0.395152	Yes										MB21D2	null	null	7265	0.0293425	0.00595813	No
RAC3	RAC3	ras-related C3 botulinum toxin substrate 3 (rho family, small GTP binding protein Rac3)	3105	0.0270416	0.400873	Yes										PREP	PREP	prolyl endopeptidase	7521	0.0272371	-0.00443631	No
NLRP1	null	null	3252	0.0258341	0.399823	Yes										MTDH	MTDH	metadherin	7699	0.0255611	-0.0109425	No
DIAPH1	DIAPH1	diaphanous homolog 1 (Drosophila)	3324	0.0252895	0.402544	Yes										MRPS26	MRPS26	mitochondrial ribosomal protein S26	7728	0.0253787	-0.00969961	No
PDLIM5	PDLIM5	PDZ and LIM domain 5	3327	0.02527	0.408858	Yes										PDAP1	PDAP1	PDGFA associated protein 1	7752	0.0251909	-0.00821603	No
PLIN3	null	null	3384	0.0248648	0.412254	Yes										ZSCAN21	ZSCAN21	zinc finger and SCAN domain containing 21	7859	0.024357	-0.0111487	No
DUS1L	DUS1L	dihydrouridine synthase 1-like (S. cerevisiae)	3518	0.0240334	0.411424	Yes										PCDHGC4	PCDHGC4	protocadherin gamma subfamily C, 4	8025	0.0228782	-0.0173149	No
SPG20	SPART	spastic paraplegia 20, spartin (Troyer syndrome)	3648	0.023038	0.41055	Yes										RAB31	RAB31	RAB31, member RAS oncogene family	8334	0.0203328	-0.031208	No
NSFL1C	NSFL1C	NSFL1 (p97) cofactor (p47)	3732	0.0224773	0.411932	Yes										CTNS	CTNS	cystinosis, nephropathic	8542	0.0185959	-0.04002	No
SAP30BP	SAP30BP	SAP30 binding protein	3780	0.0221449	0.415106	Yes										PPM1F	PPM1F	protein phosphatase 1F (PP2C domain containing)	8600	0.0180668	-0.0410678	No
TRIP10	TRIP10	thyroid hormone receptor interactor 10	4072	0.0202676	0.405082	No										PRCD	PRCD	progressive rod-cone degeneration	8728	0.0169757	-0.0458814	No
PAFAH1B1	PAFAH1B1	platelet-activating factor acetylhydrolase, isoform Ib, alpha subunit 45kDa	4358	0.0186346	0.394956	No										TMOD3	TMOD3	tropomodulin 3 (ubiquitous)	8812	0.0163336	-0.0484694	No
ZMAT3	ZMAT3	zinc finger, matrin type 3	4384	0.0184839	0.398347	No										FES	FES	feline sarcoma oncogene	8975	0.0148118	-0.0553383	No
CRTC3	CRTC3	CREB regulated transcription coactivator 3	4553	0.0175609	0.394048	No										TIMM44	TIMM44	translocase of inner mitochondrial membrane 44 homolog (yeast)	8996	0.0146491	-0.054821	No
HIC2	HIC2	hypermethylated in cancer 2	4583	0.0173889	0.396953	No										FGF1	FGF1	fibroblast growth factor 1 (acidic)	9094	0.0137588	-0.058413	No
KDM4B	null	null	4590	0.0173395	0.401044	No										NAPG	NAPG	N-ethylmaleimide-sensitive factor attachment protein, gamma	9150	0.0133422	-0.0598597	No
LPIN2	LPIN2	lipin 2	4904	0.0157693	0.388731	No										MESDC2	MESD	mesoderm development candidate 2	9254	0.0125504	-0.0638933	No
LRRC8B	LRRC8B	leucine rich repeat containing 8 family, member B	5204	0.014239	0.376758	No										CCDC57	CCDC57	coiled-coil domain containing 57	9282	0.01239	-0.0639815	No
PIP5K1C	PIP5K1C	phosphatidylinositol-4-phosphate 5-kinase, type I, gamma	5214	0.0141916	0.379893	No										REXO1	REXO1	REX1, RNA exonuclease 1 homolog (S. cerevisiae)	9626	0.00969335	-0.0808324	No
TBC1D20	TBC1D20	TBC1 domain family, member 20	5551	0.0126638	0.365592	No										AP4M1	AP4M1	adaptor-related protein complex 4, mu 1 subunit	9639	0.00958847	-0.0804369	No
CSNK1D	CSNK1D	casein kinase 1, delta	5738	0.0118481	0.358903	No										ZBTB17	ZBTB17	zinc finger and BTB domain containing 17	9832	0.00809428	-0.0895854	No
FZR1	FZR1	fizzy/cell division cycle 20 related 1 (Drosophila)	5879	0.0111904	0.354446	No										ANTXR2	ANTXR2	anthrax toxin receptor 2	9856	0.00783637	-0.08995	No
TBL1X	TBL1X	transducin (beta)-like 1X-linked	6010	0.0105961	0.35036	No										DOT1L	DOT1L	DOT1-like, histone H3 methyltransferase (S. cerevisiae)	9925	0.0071785	-0.0927309	No
FBLIM1	FBLIM1	filamin binding LIM protein 1	6011	0.0105949	0.353051	No										ARAP1	null	null	10029	0.00637383	-0.0974222	No
NDUFA2	NDUFA2	NADH dehydrogenase (ubiquinone) 1 alpha subcomplex, 2, 8kDa	6013	0.0105833	0.355687	No										ZMAT3	ZMAT3	zinc finger, matrin type 3	10054	0.0061467	-0.0980189	No
POLR2E	POLR2E	polymerase (RNA) II (DNA directed) polypeptide E, 25kDa	6067	0.0104087	0.355567	No										OVOL3	OVOL3	-	10092	0.00580325	-0.09933	No
USP14	USP14	ubiquitin specific peptidase 14 (tRNA-guanine transglycosylase)	6148	0.0100544	0.35395	No										UBE2G1	UBE2G1	ubiquitin-conjugating enzyme E2G 1 (UBC7 homolog, yeast)	10095	0.00577448	-0.0988193	No
AP3D1	AP3D1	adaptor-related protein complex 3, delta 1 subunit	6169	0.00993774	0.355432	No										DAZAP1	DAZAP1	DAZ associated protein 1	10139	0.00538526	-0.100488	No
NDC80	null	null	6214	0.00977196	0.35562	No										PRDM8	PRDM8	PR domain containing 8	10355	0.00341375	-0.111334	No
KIAA0141	DELE1	KIAA0141	6248	0.0096448	0.356349	No										WDR45B	null	null	10536	0.00206364	-0.120499	No
BSG	BSG	basigin (Ok blood group)	6543	0.00850739	0.343181	No										AP3D1	AP3D1	adaptor-related protein complex 3, delta 1 subunit	10679	0.000697953	-0.127828	No
MAPK1	MAPK1	mitogen-activated protein kinase 1	6562	0.00843221	0.344384	No										ZNF3	ZNF3	zinc finger protein 3	10690	0.000550594	-0.128291	No
TXNRD2	TXNRD2	thioredoxin reductase 2	6588	0.0083557	0.345203	No										SLC2A11	SLC2A11	solute carrier family 2 (facilitated glucose transporter), member 11	10697	0.000534803	-0.128547	No
TSC22D4	TSC22D4	TSC22 domain family, member 4	6590	0.00835088	0.347272	No										KIAA0141	DELE1	KIAA0141	10769	-8.98171e-05	-0.132239	No
MICAL3	MICAL3	microtubule associated monoxygenase, calponin and LIM domain containing 3	6669	0.00802074	0.345243	No										FZR1	FZR1	fizzy/cell division cycle 20 related 1 (Drosophila)	10798	-0.000336845	-0.133663	No
JSRP1	JSRP1	junctional sarcoplasmic reticulum protein 1	6806	0.00745746	0.340046	No										PRPSAP1	PRPSAP1	phosphoribosyl pyrophosphate synthetase-associated protein 1	10900	-0.00126014	-0.138794	No
PRPSAP1	PRPSAP1	phosphoribosyl pyrophosphate synthetase-associated protein 1	6871	0.0071781	0.338532	No										GRSF1	GRSF1	G-rich RNA sequence binding factor 1	10947	-0.00164271	-0.141018	No
FBXO42	FBXO42	F-box protein 42	6874	0.00716471	0.340248	No										NUDT4	NUDT4	nudix (nucleoside diphosphate linked moiety X)-type motif 4	10957	-0.00172338	-0.141304	No
DCP1A	DCP1A	DCP1 decapping enzyme homolog A (S. cerevisiae)	7108	0.00630738	0.329702	No										GTF2F1	GTF2F1	general transcription factor IIF, polypeptide 1, 74kDa	11071	-0.00265193	-0.146913	No
NCLN	NCLN	nicalin homolog (zebrafish)	7138	0.00621896	0.32977	No										SMOX	SMOX	spermine oxidase	11163	-0.0033476	-0.151301	No
RNF126	RNF126	ring finger protein 126	7150	0.00619223	0.330769	No										RANBP3	RANBP3	RAN binding protein 3	11178	-0.00353815	-0.151654	No
OXA1L	OXA1L	oxidase (cytochrome c) assembly 1-like	7173	0.0061303	0.331179	No										DERL1	DERL1	Der1-like domain family, member 1	11181	-0.00355324	-0.15138	No
ARNT2	ARNT2	aryl-hydrocarbon receptor nuclear translocator 2	7404	0.0052718	0.320526	No										DERL3	DERL3	Der1-like domain family, member 3	11249	-0.00420287	-0.154425	No
ADAM12	ADAM12	ADAM metallopeptidase domain 12 (meltrin alpha)	7443	0.00509748	0.31984	No										APBA3	APBA3	amyloid beta (A4) precursor protein-binding, family A, member 3 (X11-like 2)	11366	-0.00518296	-0.159921	No
TBCD	TBCD	tubulin-specific chaperone d	7557	0.00466989	0.315134	No										FBXO32	FBXO32	F-box protein 32	11436	-0.00587917	-0.162893	No
PPM1F	PPM1F	protein phosphatase 1F (PP2C domain containing)	7734	0.004006	0.306976	No										SASH1	SASH1	SAM and SH3 domain containing 1	11505	-0.00649818	-0.165746	No
ADK	ADK	adenosine kinase	7875	0.00355654	0.30058	No										SAP30BP	SAP30BP	SAP30 binding protein	11543	-0.00685229	-0.166945	No
DERL1	DERL1	Der1-like domain family, member 1	7965	0.00320035	0.296752	No										SAFB	SAFB	scaffold attachment factor B	11745	-0.00868775	-0.1765	No
TRIB3	TRIB3	tribbles homolog 3 (Drosophila)	7978	0.00314797	0.296926	No										PIKFYVE	null	null	11775	-0.00907433	-0.177045	No
GTF2F1	GTF2F1	general transcription factor IIF, polypeptide 1, 74kDa	8017	0.00299282	0.295705	No										ARID3A	ARID3A	AT rich interactive domain 3A (BRIGHT- like)	11856	-0.00966175	-0.180188	No
GRSF1	GRSF1	G-rich RNA sequence binding factor 1	8082	0.00270583	0.293056	No										TRAPPC8	null	null	11993	-0.0109037	-0.186117	No
SAFB	SAFB	scaffold attachment factor B	8088	0.00267175	0.293473	No										CSNK1D	CSNK1D	casein kinase 1, delta	12102	-0.0119883	-0.190471	No
REM2	REM2	RAS (RAD and GEM) like GTP binding 2	8232	0.00216529	0.286568	No										SMG6	SMG6	Smg-6 homolog, nonsense mediated mRNA decay factor (C. elegans)	12243	-0.0135795	-0.196324	No
PTPRA	PTPRA	protein tyrosine phosphatase, receptor type, A	8486	0.00129311	0.273705	No										FRS2	FRS2	fibroblast growth factor receptor substrate 2	12268	-0.0138357	-0.196102	No
PREP	PREP	prolyl endopeptidase	8596	0.000983555	0.268272	No										DIAPH1	DIAPH1	diaphanous homolog 1 (Drosophila)	12396	-0.0149637	-0.20113	No
PDAP1	PDAP1	PDGFA associated protein 1	8615	0.000913874	0.267566	No										PAFAH1B1	PAFAH1B1	platelet-activating factor acetylhydrolase, isoform Ib, alpha subunit 45kDa	12406	-0.0150602	-0.199995	No
ARAP1	null	null	8790	0.000381951	0.258591	No										LPIN2	LPIN2	lipin 2	12441	-0.0154238	-0.200125	No
RHBDF2	RHBDF2	rhomboid 5 homolog 2 (Drosophila)	8831	0.000199571	0.256556	No										TBCD	TBCD	tubulin-specific chaperone d	12480	-0.0156909	-0.200436	No
METTL23	null	null	8929	-0.000105711	0.251526	No										PDLIM5	PDLIM5	PDZ and LIM domain 5	12487	-0.0157715	-0.199069	No
S1PR4	null	null	8999	-0.000308391	0.248006	No										UBE2L3	UBE2L3	ubiquitin-conjugating enzyme E2L 3	12610	-0.0169831	-0.203621	No
TMOD3	TMOD3	tropomodulin 3 (ubiquitous)	9014	-0.000350754	0.247366	No										BSG	BSG	basigin (Ok blood group)	12658	-0.017413	-0.204217	No
RAI14	RAI14	retinoic acid induced 14	9034	-0.000416883	0.246481	No										PEX26	PEX26	peroxisome biogenesis factor 26	12810	-0.0189436	-0.210072	No
DOT1L	DOT1L	DOT1-like, histone H3 methyltransferase (S. cerevisiae)	9273	-0.00125798	0.234392	No										FAH	FAH	fumarylacetoacetate hydrolase (fumarylacetoacetase)	12824	-0.0190572	-0.208721	No
VPS53	VPS53	vacuolar protein sorting 53 (S. cerevisiae)	9295	-0.00131349	0.23363	No										FBLIM1	FBLIM1	filamin binding LIM protein 1	12833	-0.019188	-0.207094	No
BID	BID	BH3 interacting domain death agonist	9300	-0.00132555	0.233759	No										SPG20	SPART	spastic paraplegia 20, spartin (Troyer syndrome)	13214	-0.0231991	-0.224436	No
ATP5C1	ATP5F1C	ATP synthase, H+ transporting, mitochondrial F1 complex, gamma polypeptide 1	9455	-0.00186791	0.226204	No										RFX2	RFX2	regulatory factor X, 2 (influences HLA class II expression)	13221	-0.0232655	-0.222271	No
DAZAP1	DAZAP1	DAZ associated protein 1	9497	-0.00199409	0.224573	No										PLD2	PLD2	phospholipase D2	13370	-0.0247607	-0.227351	No
ZDHHC8	ZDHHC8	zinc finger, DHHC-type containing 8	9538	-0.0021455	0.223032	No										PAPPA	PAPPA	pregnancy-associated plasma protein A, pappalysin 1	13644	-0.0276622	-0.238638	No
ZNF3	ZNF3	zinc finger protein 3	9639	-0.00246148	0.218443	No										CABIN1	CABIN1	-	13663	-0.0278223	-0.236614	No
CHRNE	CHRNE	cholinergic receptor, nicotinic, epsilon	9702	-0.00265032	0.215884	No										RALBP1	RALBP1	ralA binding protein 1	13814	-0.0295893	-0.241283	No
DERL3	DERL3	Der1-like domain family, member 3	10012	-0.00367483	0.200707	No										SIRPA	SIRPA	signal-regulatory protein alpha	13822	-0.0296751	-0.238488	No
SLC2A11	SLC2A11	solute carrier family 2 (facilitated glucose transporter), member 11	10093	-0.00394636	0.197538	No										TRIP10	TRIP10	thyroid hormone receptor interactor 10	14104	-0.0331864	-0.249604	No
RAB21	RAB21	RAB21, member RAS oncogene family	10213	-0.00431697	0.19243	No										RNF24	RNF24	ring finger protein 24	14122	-0.0334007	-0.246934	No
ELAVL1	ELAVL1	ELAV (embryonic lethal, abnormal vision, Drosophila)-like 1 (Hu antigen R)	10229	-0.00437796	0.19276	No										MLLT1	MLLT1	myeloid/lymphoid or mixed-lineage leukemia (trithorax homolog, Drosophila); translocated to, 1	14164	-0.0339493	-0.245456	No
RFX2	RFX2	regulatory factor X, 2 (influences HLA class II expression)	10310	-0.00460544	0.189759	No										PIP5K1C	PIP5K1C	phosphatidylinositol-4-phosphate 5-kinase, type I, gamma	14231	-0.0348337	-0.245187	No
SMG6	SMG6	Smg-6 homolog, nonsense mediated mRNA decay factor (C. elegans)	10409	-0.00491246	0.185897	No										WDR81	WDR81	WD repeat domain 81	14276	-0.0353051	-0.243721	No
MRPS26	MRPS26	mitochondrial ribosomal protein S26	10436	-0.00501145	0.185815	No										HIC2	HIC2	hypermethylated in cancer 2	14386	-0.0367569	-0.24549	No
ZNF710	ZNF710	zinc finger protein 710	10608	-0.00555717	0.178311	No										PTPRA	PTPRA	protein tyrosine phosphatase, receptor type, A	14445	-0.0373904	-0.244532	No
CSNK2A1	CSNK2A1	casein kinase 2, alpha 1 polypeptide	10733	-0.00598681	0.173366	No										GPR108	GPR108	G protein-coupled receptor 108	14490	-0.0381034	-0.242768	No
JKAMP	null	null	10832	-0.00631264	0.16986	No										KDM4B	null	null	14555	-0.0387786	-0.241975	No
MLLT1	MLLT1	myeloid/lymphoid or mixed-lineage leukemia (trithorax homolog, Drosophila); translocated to, 1	10851	-0.00638374	0.170543	No										RAC3	RAC3	ras-related C3 botulinum toxin substrate 3 (rho family, small GTP binding protein Rac3)	14577	-0.0390263	-0.238914	No
PRDM8	PRDM8	PR domain containing 8	11018	-0.0069064	0.163642	No										ATG16L2	ATG16L2	ATG16 autophagy related 16-like 2 (S. cerevisiae)	14609	-0.0393302	-0.236342	No
PAPPA	PAPPA	pregnancy-associated plasma protein A, pappalysin 1	11369	-0.00799255	0.147424	No										FURIN	FURIN	furin (paired basic amino acid cleaving enzyme)	14756	-0.0410382	-0.239583	No
NAPG	NAPG	N-ethylmaleimide-sensitive factor attachment protein, gamma	11370	-0.0079954	0.149455	No										SF3A2	SF3A2	splicing factor 3a, subunit 2, 66kDa	14886	-0.042993	-0.24173	No
CRKL	CRKL	v-crk sarcoma virus CT10 oncogene homolog (avian)-like	11392	-0.00812181	0.150423	No										GPCPD1	null	null	15094	-0.0455266	-0.247674	No
RANBP3	RANBP3	RAN binding protein 3	11449	-0.00832418	0.149618	No										REM2	REM2	RAS (RAD and GEM) like GTP binding 2	15389	-0.0495296	-0.257728	No
PRCD	PRCD	progressive rod-cone degeneration	11618	-0.00889866	0.143119	No										ENOSF1	ENOSF1	enolase superfamily member 1	15598	-0.0526868	-0.262962	Yes
LAMA1	LAMA1	laminin, alpha 1	11655	-0.00906793	0.143545	No										ZDHHC8	ZDHHC8	zinc finger, DHHC-type containing 8	15673	-0.0537353	-0.261097	Yes
ATG16L2	ATG16L2	ATG16 autophagy related 16-like 2 (S. cerevisiae)	11812	-0.00960139	0.13785	No										IQGAP1	IQGAP1	IQ motif containing GTPase activating protein 1	15740	-0.0548457	-0.258697	Yes
PCDHGC4	PCDHGC4	protocadherin gamma subfamily C, 4	11824	-0.00963436	0.139724	No										SAFB2	SAFB2	scaffold attachment factor B2	15828	-0.0564473	-0.257222	Yes
SIPA1L1	SIPA1L1	signal-induced proliferation-associated 1 like 1	11831	-0.00964377	0.14186	No										RAB21	RAB21	RAB21, member RAS oncogene family	15831	-0.0565002	-0.251309	Yes
RNF24	RNF24	ring finger protein 24	12027	-0.0103417	0.13432	No										ANKFY1	ANKFY1	ankyrin repeat and FYVE domain containing 1	15874	-0.0570992	-0.247418	Yes
FOXK2	FOXK2	forkhead box K2	12554	-0.0122186	0.109999	No										MIER2	MIER2	mesoderm induction early response 1, family member 2	15929	-0.0580165	-0.244055	Yes
FAM64A	PIMREG	family with sequence similarity 64, member A	12561	-0.0122464	0.112797	No										PTPRS	PTPRS	protein tyrosine phosphatase, receptor type, S	15962	-0.058462	-0.239497	Yes
FRS2	FRS2	fibroblast growth factor receptor substrate 2	12599	-0.0123811	0.114013	No										GRIN3B	GRIN3B	glutamate receptor, ionotropic, N-methyl-D-aspartate 3B	15970	-0.0586013	-0.233622	Yes
NARF	NARF	nuclear prelamin A recognition factor	12626	-0.0125121	0.115835	No										NUMA1	NUMA1	nuclear mitotic apparatus protein 1	16042	-0.0597422	-0.230961	Yes
GPR108	GPR108	G protein-coupled receptor 108	12688	-0.0127422	0.115891	No										FOXK2	FOXK2	forkhead box K2	16198	-0.0620169	-0.232438	Yes
FAM57A	FAM57A	family with sequence similarity 57, member A	12691	-0.0127622	0.119028	No										VPS53	VPS53	vacuolar protein sorting 53 (S. cerevisiae)	16220	-0.0624744	-0.226879	Yes
SMOX	SMOX	spermine oxidase	12705	-0.0128104	0.121604	No										RECQL5	RECQL5	RecQ protein-like 5	16255	-0.0631396	-0.221928	Yes
MED16	null	null	12747	-0.0129065	0.122745	No										S1PR4	null	null	16268	-0.0633157	-0.21581	Yes
PIAS4	PIAS4	protein inhibitor of activated STAT, 4	12757	-0.0129825	0.125573	No										CSNK2A1	CSNK2A1	casein kinase 2, alpha 1 polypeptide	16415	-0.0661187	-0.216381	Yes
ZBTB17	ZBTB17	zinc finger and BTB domain containing 17	13303	-0.0148361	0.100927	No										PIAS4	PIAS4	protein inhibitor of activated STAT, 4	16432	-0.0664921	-0.210134	Yes
UBE4B	UBE4B	ubiquitination factor E4B (UFD2 homolog, yeast)	13343	-0.0149876	0.1027	No										SMYD4	SMYD4	SET and MYND domain containing 4	16474	-0.0673257	-0.205102	Yes
SBNO2	SBNO2	strawberry notch homolog 2 (Drosophila)	13440	-0.015347	0.101593	No										CRTC3	CRTC3	CREB regulated transcription coactivator 3	16503	-0.0678441	-0.199337	Yes
MOB3A	null	null	13932	-0.0171108	0.0803392	No										KIDINS220	KIDINS220	-	16538	-0.0685425	-0.19381	Yes
MESDC2	MESD	mesoderm development candidate 2	13935	-0.0171145	0.084582	No										ELAVL1	ELAVL1	ELAV (embryonic lethal, abnormal vision, Drosophila)-like 1 (Hu antigen R)	16544	-0.0686373	-0.186761	Yes
PLD2	PLD2	phospholipase D2	14017	-0.0174291	0.0847857	No										FBXO42	FBXO42	F-box protein 42	16561	-0.0688701	-0.18026	Yes
SMYD4	SMYD4	SET and MYND domain containing 4	14236	-0.0182738	0.0780612	No										GEMIN4	GEMIN4	gem (nuclear organelle) associated protein 4	16673	-0.0712014	-0.178465	Yes
ZSCAN21	ZSCAN21	zinc finger and SCAN domain containing 21	14452	-0.0191488	0.0717153	No										RAB12	RAB12	RAB12, member RAS oncogene family	16919	-0.0769156	-0.183047	Yes
NUDT4	NUDT4	nudix (nucleoside diphosphate linked moiety X)-type motif 4	14757	-0.0205093	0.0610747	No										UBE4B	UBE4B	ubiquitination factor E4B (UFD2 homolog, yeast)	16931	-0.0772547	-0.175394	Yes
PIKFYVE	null	null	14795	-0.0206255	0.0643844	No										OSBP	OSBP	oxysterol binding protein	16953	-0.0778749	-0.168195	Yes
ZNF555	ZNF555	zinc finger protein 555	14879	-0.0209676	0.0653826	No										TBL1X	TBL1X	transducin (beta)-like 1X-linked	17016	-0.0793025	-0.162982	Yes
APBA3	APBA3	amyloid beta (A4) precursor protein-binding, family A, member 3 (X11-like 2)	14892	-0.0210091	0.0700932	No										SIPA1L1	SIPA1L1	signal-induced proliferation-associated 1 like 1	17116	-0.0813522	-0.15948	Yes
CCDC57	CCDC57	coiled-coil domain containing 57	14982	-0.0213743	0.0708819	No										POP1	POP1	processing of precursor 1, ribonuclease P/MRP subunit (S. cerevisiae)	17130	-0.081619	-0.151466	Yes
CABIN1	CABIN1	-	15030	-0.0216318	0.0739258	No										LMNB2	LMNB2	lamin B2	17134	-0.0818217	-0.142908	Yes
RECQL5	RECQL5	RecQ protein-like 5	15297	-0.0228832	0.0658694	No										LAMA1	LAMA1	laminin, alpha 1	17326	-0.0868614	-0.143616	Yes
FGF1	FGF1	fibroblast growth factor 1 (acidic)	15307	-0.0229156	0.0712206	No										FAM57A	FAM57A	family with sequence similarity 57, member A	17480	-0.0919755	-0.141798	Yes
LAPTM4B	LAPTM4B	lysosomal associated protein transmembrane 4 beta	15425	-0.0234448	0.0710754	No										CRKL	CRKL	v-crk sarcoma virus CT10 oncogene homolog (avian)-like	17508	-0.0929542	-0.133307	Yes
CORO2B	CORO2B	coronin, actin binding protein, 2B	15451	-0.0235465	0.0757526	No										SMURF1	SMURF1	SMAD specific E3 ubiquitin protein ligase 1	17642	-0.0974704	-0.129861	Yes
TIMM44	TIMM44	translocase of inner mitochondrial membrane 44 homolog (yeast)	15878	-0.0256071	0.0600461	No										KIF1C	KIF1C	kinesin family member 1C	17760	-0.101388	-0.125163	Yes
LMNB2	LMNB2	lamin B2	15934	-0.0258995	0.0637568	No										CFD	CFD	complement factor D (adipsin)	17838	-0.104875	-0.118009	Yes
MIER2	MIER2	mesoderm induction early response 1, family member 2	16093	-0.0267102	0.0623033	No										ARNT2	ARNT2	aryl-hydrocarbon receptor nuclear translocator 2	17945	-0.110011	-0.11182	Yes
UBE2L3	UBE2L3	ubiquitin-conjugating enzyme E2L 3	16280	-0.027693	0.0596396	No										DCP1A	DCP1A	DCP1 decapping enzyme homolog A (S. cerevisiae)	17987	-0.11199	-0.102031	Yes
FES	FES	feline sarcoma oncogene	16562	-0.0292416	0.0524162	No										CHD8	CHD8	chromodomain helicase DNA binding protein 8	18203	-0.121225	-0.10033	Yes
POP1	POP1	processing of precursor 1, ribonuclease P/MRP subunit (S. cerevisiae)	16700	-0.0300807	0.0529136	No										MACF1	MACF1	microtubule-actin crosslinking factor 1	18255	-0.124737	-0.0897052	Yes
OVOL3	OVOL3	-	16968	-0.0317525	0.0470579	No										ARPC1A	ARPC1A	actin related protein 2/3 complex, subunit 1A, 41kDa	18368	-0.130644	-0.0816315	Yes
PSMF1	PSMF1	proteasome (prosome, macropain) inhibitor subunit 1 (PI31)	17014	-0.0320196	0.0528445	No										MOB3A	null	null	18604	-0.148288	-0.0780916	Yes
REXO1	REXO1	REX1, RNA exonuclease 1 homolog (S. cerevisiae)	17108	-0.0326284	0.0562831	No										FCHSD2	FCHSD2	FCH and double SH3 domains 2	18643	-0.152318	-0.0638515	Yes
SMURF1	SMURF1	SMAD specific E3 ubiquitin protein ligase 1	17393	-0.0348457	0.0503267	No										RAI14	RAI14	retinoic acid induced 14	18651	-0.153211	-0.0479	Yes
PEX26	PEX26	peroxisome biogenesis factor 26	17608	-0.0366386	0.0484752	No										MICAL3	MICAL3	microtubule associated monoxygenase, calponin and LIM domain containing 3	18809	-0.169808	-0.0380016	Yes
LPPR3	null	null	17694	-0.0373849	0.0535391	No										IDH1	IDH1	isocitrate dehydrogenase 1 (NADP+), soluble	18885	-0.180132	-0.0227285	Yes
IDH1	IDH1	isocitrate dehydrogenase 1 (NADP+), soluble	18390	-0.0461701	0.0290304	No										SPEN	SPEN	spen homolog, transcriptional regulator (Drosophila)	19059	-0.218841	-0.00844251	Yes
GRIN3B	GRIN3B	glutamate receptor, ionotropic, N-methyl-D-aspartate 3B	19240	-0.0846127	0.00625677	No										CORO2B	CORO2B	coronin, actin binding protein, 2B	19082	-0.226147	0.0144944	Yes

## Sheet: Atrophic genes expression
Expression levels of atrophic genes in CN vs FSHD1						Expression levels of atrophic genes in CN vs FSHD2
ENSEMBL	Gene Symbol	CN Log2 fpkm+1	FSHD1 Log2 fpkm+1	Cell (MB/MT)		ENSEMBL	Gene Symbol	CN Log2 fpkm+1	FSHD2 Log2 fpkm+1	Cell (MB/MT)
ENSG00000163297.12	ANTXR2	6.496	6.32853	MB		ENSG00000163297.12	ANTXR2	6.47865	5.84282	MB
ENSG00000163110.10	PDLIM5	5.63837	6.11585	MB		ENSG00000163110.10	PDLIM5	5.62328	4.57264	MB
ENSG00000152784.11	PRDM8	4.43265	3.91747	MB		ENSG00000018189.8	RUFY3	5.00563	4.59804	MB
ENSG00000132463.9	GRSF1	6.31102	6.38009	MB		ENSG00000132463.9	GRSF1	6.29416	6.44299	MB
ENSG00000018189.8	RUFY3	5.02394	4.97501	MB		ENSG00000152784.11	PRDM8	4.41231	3.58124	MB
ENSG00000243156.3	MICAL3	2.92622	3.5066	MB		ENSG00000185722.12	ANKFY1	3.21297	2.97234	MB
ENSG00000242419.1	PCDHGC4	0.0197038	0.0215704	MB		ENSG00000221838.5	AP4M1	3.44125	4.48032	MB
ENSG00000241685.4	ARPC1A	6.18604	6.40148	MB		ENSG00000146376.6	ARHGAP18	5.38064	4.43417	MB
ENSG00000221838.5	AP4M1	3.45377	3.40694	MB		ENSG00000116017.6	ARID3A	2.13393	2.30026	MB
ENSG00000215193.8	PEX26	3.06501	3.07806	MB		ENSG00000241685.4	ARPC1A	6.16993	6.8531	MB
ENSG00000214140.6	PRCD	0.863928	1.12253	MB		ENSG00000186716.15	BCR	2.77639	2.81357	MB
ENSG00000206418.3	RAB12	5.04198	4.96834	MB		ENSG00000197766.3	CFD	3.35841	2.80576	MB
ENSG00000198742.5	SMURF1	2.35975	2.5612	MB		ENSG00000100888.8	CHD8	5.12558	4.40641	MB
ENSG00000198053.7	SIRPA	4.59772	4.49679	MB		ENSG00000040531.10	CTNS	2.62256	2.38114	MB
ENSG00000197766.3	CFD	3.37131	4.71257	MB		ENSG00000131504.11	DIAPH1	4.27925	4.49314	MB
ENSG00000197555.5	SIPA1L1	4.11673	4.69686	MB		ENSG00000169718.13	DUS1L	5.25387	6.08068	MB
ENSG00000197147.8	LRRC8B	1.53013	1.67278	MB		ENSG00000132199.14	ENOSF1	3.85767	4.16893	MB
ENSG00000196569.7	LAMA2	7.07915	6.78209	MB		ENSG00000103876.7	FAH	3.7128	4.58705	MB
ENSG00000188186.6	LAMTOR4	6.12978	6.02955	MB		ENSG00000156804.3	FBXO32	6.27796	5.77915	MB
ENSG00000186716.15	BCR	2.78902	3.14123	MB		ENSG00000137478.10	FCHSD2	3.52872	3.06954	MB
ENSG00000186635.10	ARAP1	4.67564	4.66703	MB		ENSG00000140564.6	FURIN	4.77521	5.17552	MB
ENSG00000186532.7	SMYD4	2.53426	2.37484	MB		ENSG00000179409.6	GEMIN4	2.679	3.55728	MB
ENSG00000186300.7	ZNF555	2.318	2.28556	MB		ENSG00000125772.8	GPCPD1	2.30861	2.06287	MB
ENSG00000186111.4	PIP5K1C	3.30028	3.08894	MB		ENSG00000140575.8	IQGAP1	7.56673	6.33213	MB
ENSG00000185760.11	KCNQ5	2.30373	1.81931	MB		ENSG00000185760.11	KCNQ5	2.29176	1.75411	MB
ENSG00000185722.12	ANKFY1	3.22743	3.15315	MB		ENSG00000134313.10	KIDINS220	4.14424	3.07131	MB
ENSG00000185651.10	UBE2L3	5.83355	5.93298	MB		ENSG00000129250.7	KIF1C	6.15192	6.35108	MB
ENSG00000184470.15	TXNRD2	4.38265	4.38338	MB		ENSG00000196569.7	LAMA2	7.0576	6.04643	MB
ENSG00000184178.11	SCFD2	3.26525	3.37724	MB		ENSG00000188186.6	LAMTOR4	6.11414	7.06399	MB
ENSG00000182752.8	PAPPA	0.843941	2.67496	MB		ENSG00000127603.19	MACF1	7.79256	7.11068	MB
ENSG00000182511.7	FES	1.84458	1.99837	MB		ENSG00000069956.7	MAPK6	4.67561	4.14012	MB
ENSG00000181396.8	OGFOD3	4.45009	4.0455	MB		ENSG00000180611.6	MB21D2	1.35383	1.65763	MB
ENSG00000181038.9	METTL23	4.36383	4.43393	MB		ENSG00000147649.5	MTDH	6.42389	5.08041	MB
ENSG00000180611.6	MB21D2	1.36171	1.17016	MB		ENSG00000091592.11	NLRP1	3.81541	3.3453	MB
ENSG00000179409.6	GEMIN4	2.69233	2.8667	MB		ENSG00000088833.13	NSFL1C	5.49523	5.76719	MB
ENSG00000176619.6	LMNB2	5.90457	5.78403	MB		ENSG00000137497.13	NUMA1	5.11165	5.46463	MB
ENSG00000176155.14	CCDC57	3.79472	3.59997	MB		ENSG00000181396.8	OGFOD3	4.4345	4.7322	MB
ENSG00000175221.10	MED16	4.03592	3.99821	MB		ENSG00000110048.7	OSBP	3.8655	3.52623	MB
ENSG00000173598.9	NUDT4	2.37976	2.17381	MB		ENSG00000105355.4	PLIN3	8.09617	8.88418	MB
ENSG00000172667.6	ZMAT3	4.39899	3.96584	MB		ENSG00000154845.11	PPP4R1	5.79732	4.80838	MB
ENSG00000172379.14	ARNT2	2.76617	2.92325	MB		ENSG00000105426.10	PTPRS	3.80171	3.2138	MB
ENSG00000172270.14	BSG	8.39735	8.51107	MB		ENSG00000206418.3	RAB12	5.02274	4.77414	MB
ENSG00000172081.9	MOB3A	3.73374	3.80241	MB		ENSG00000168461.8	RAB31	4.80473	4.28883	MB
ENSG00000171861.6	MRM3	3.13047	3.06293	MB		ENSG00000169750.4	RAC3	1.78359	3.55401	MB
ENSG00000169750.4	RAC3	1.79519	2.0171	MB		ENSG00000017797.7	RALBP1	4.3099	4.16746	MB
ENSG00000169718.13	DUS1L	5.27032	5.10552	MB		ENSG00000171861.6	MRM3	3.11499	3.77234	MB
ENSG00000169635.5	HIC2	0.489148	0.434941	MB		ENSG00000130254.7	SAFB2	4.88922	5.04641	MB
ENSG00000168461.8	RAB31	4.81983	4.98591	MB		ENSG00000161526.10	SAP30BP	6.2486	5.98707	MB
ENSG00000168010.6	ATG16L2	2.76038	2.7251	MB		ENSG00000111961.12	SASH1	2.41667	2.28899	MB
ENSG00000167716.14	WDR81	3.7471	3.47181	MB		ENSG00000184178.11	SCFD2	3.25114	3.55959	MB
ENSG00000167695.10	FAM57A	3.31031	3.59759	MB		ENSG00000129657.10	SEC14L1	5.56626	4.63442	MB
ENSG00000167476.6	JSRP1	6.66453	6.30963	MB		ENSG00000104897.5	SF3A2	5.61683	6.01632	MB
ENSG00000166925.4	TSC22D4	3.53533	3.66962	MB		ENSG00000198053.7	SIRPA	4.58499	5.03668	MB
ENSG00000166529.10	ZSCAN21	2.3292	2.36606	MB		ENSG00000065526.6	SPEN	3.63435	3.2917	MB
ENSG00000166526.12	ZNF3	3.23587	3.20965	MB		ENSG00000133104.8	SPART	7.6511	5.3293	MB
ENSG00000166225.4	FRS2	2.5041	2.5043	MB		ENSG00000153339.9	TRAPPC8	4.3642	3.61186	MB
ENSG00000165629.15	ATP5F1C	8.00679	8.16267	MB		ENSG00000089195.10	TRMT6	3.81157	3.51835	MB
ENSG00000162458.8	FBLIM1	3.34893	3.47245	MB		ENSG00000132388.8	UBE2G1	4.57295	4.76674	MB
ENSG00000162290.12	DCP1A	2.51018	2.8763	MB		ENSG00000141580.11	WDR45B	5.30385	5.27379	MB
ENSG00000161542.12	PRPSAP1	4.18702	4.22535	MB		ENSG00000167716.14	WDR81	3.73204	4.25132	MB
ENSG00000161526.10	SAP30BP	6.26971	6.33751	MB		ENSG00000148848.10	ADAM12	2.59039	3.35526	MB
ENSG00000160633.8	SAFB	5.47629	5.51196	MB		ENSG00000156110.9	ADK	4.52388	5.16426	MB
ENSG00000156804.3	FBXO32	6.29696	5.26874	MB		ENSG00000065000.11	AP3D1	5.08666	5.49759	MB
ENSG00000156110.9	ADK	4.5378	4.9492	MB		ENSG00000011132.7	APBA3	3.09649	3.43916	MB
ENSG00000155463.8	OXA1L	5.75932	5.9978	MB		ENSG00000186635.10	ARAP1	4.6588	4.58002	MB
ENSG00000154845.11	PPP4R1	5.81698	6.06539	MB		ENSG00000172379.14	ARNT2	2.75135	3.42687	MB
ENSG00000153339.9	TRAPPC8	4.38413	4.30187	MB		ENSG00000168010.6	ATG16L2	2.74122	2.97863	MB
ENSG00000148848.10	ADAM12	2.60565	3.70256	MB		ENSG00000165629.15	ATP5F1C	7.98466	7.72228	MB
ENSG00000147649.5	MTDH	6.44265	7.00829	MB		ENSG00000015475.14	BID	4.42234	5.14928	MB
ENSG00000146376.6	ARHGAP18	5.40078	4.91115	MB		ENSG00000172270.14	BSG	8.38168	8.90731	MB
ENSG00000141580.11	WDR45B	5.32045	5.38351	MB		ENSG00000099991.12	CABIN1	3.80066	3.90834	MB
ENSG00000141568.15	FOXK2	4.34518	4.31788	MB		ENSG00000176155.14	CCDC57	3.7745	3.91249	MB
ENSG00000141562.13	NARF	5.14824	5.05265	MB		ENSG00000108556.7	CHRNE	0.316059	0.227994	MB
ENSG00000141556.16	TBCD	4.68612	4.7508	MB		ENSG00000103647.8	CORO2B	2.32321	3.44119	MB
ENSG00000141551.10	CSNK1D	5.91794	5.99774	MB		ENSG00000099942.8	CRKL	3.9383	3.93816	MB
ENSG00000141252.15	VPS53	4.53546	4.53324	MB		ENSG00000140577.11	CRTC3	3.82151	3.22641	MB
ENSG00000140577.11	CRTC3	3.83882	3.94151	MB		ENSG00000141551.10	CSNK1D	5.90147	6.31537	MB
ENSG00000140575.8	IQGAP1	7.58801	7.62015	MB		ENSG00000101266.12	CSNK2A1	4.90031	4.86543	MB
ENSG00000140564.6	FURIN	4.78786	4.66534	MB		ENSG00000071626.12	DAZAP1	6.78101	6.90397	MB
ENSG00000140548.5	ZNF710	1.37445	1.64035	MB		ENSG00000162290.12	DCP1A	2.49508	2.18202	MB
ENSG00000139890.5	REM2	0.166643	0.159818	MB		ENSG00000136986.5	DERL1	4.75309	5.09159	MB
ENSG00000138594.8	TMOD3	4.58377	4.71562	MB		ENSG00000099958.10	DERL3	2.61504	2.03743	MB
ENSG00000138413.9	IDH1	3.74477	3.91554	MB		ENSG00000104885.13	DOT1L	3.30033	3.55001	MB
ENSG00000137497.13	NUMA1	5.12991	5.0522	MB		ENSG00000066044.9	ELAVL1	4.78879	5.39769	MB
ENSG00000137478.10	FCHSD2	3.54362	3.80469	MB		ENSG00000167695.10	FAM57A	3.29878	3.80864	MB
ENSG00000136986.5	DERL1	4.76635	4.97338	MB		ENSG00000129195.11	PIMREG	2.51163	4.38375	MB
ENSG00000134313.10	KIDINS220	4.16019	4.07305	MB		ENSG00000162458.8	FBLIM1	3.33253	3.67014	MB
ENSG00000134265.8	NAPG	3.41105	3.68545	MB		ENSG00000037637.6	FBXO42	3.28667	3.62441	MB
ENSG00000133460.15	SLC2A11	3.05037	2.94019	MB		ENSG00000182511.7	FES	1.82768	2.05987	MB
ENSG00000133104.8	SPART	7.67497	7.69883	MB		ENSG00000113578.13	FGF1	4.65511	4.19834	MB
ENSG00000132670.16	PTPRA	5.23904	5.295	MB		ENSG00000141568.15	FOXK2	4.32708	3.87636	MB
ENSG00000132388.8	UBE2G1	4.58921	4.7353	MB		ENSG00000166225.4	FRS2	2.49185	1.91838	MB
ENSG00000132199.14	ENOSF1	3.87556	4.01575	MB		ENSG00000105325.9	FZR1	3.92057	4.72793	MB
ENSG00000131504.11	DIAPH1	4.29453	4.78008	MB		ENSG00000125734.9	GPR108	5.27165	5.44039	MB
ENSG00000131495.4	NDUFA2	5.50668	5.30743	MB		ENSG00000116032.5	GRIN3B	0.121407	0.127132	MB
ENSG00000130939.14	UBE4B	3.95591	3.94475	MB		ENSG00000125651.9	GTF2F1	5.65749	5.94428	MB
ENSG00000130382.7	MLLT1	4.13572	4.21174	MB		ENSG00000169635.5	HIC2	0.484462	0.562796	MB
ENSG00000130254.7	SAFB2	4.90833	5.08503	MB		ENSG00000138413.9	IDH1	3.72832	4.06526	MB
ENSG00000129951.14	PLPPR3	0.38913	0.174634	MB		ENSG00000050130.13	JKAMP	5.25395	4.93707	MB
ENSG00000129667.8	RHBDF2	2.06886	2.13287	MB		ENSG00000167476.6	JSRP1	6.6477	7.62164	MB
ENSG00000129657.10	SEC14L1	5.58455	6.14573	MB		ENSG00000127663.10	KDM4B	3.89993	3.95205	MB
ENSG00000129250.7	KIF1C	6.16406	5.93697	MB		ENSG00000081791.4	DELE1	4.83603	5.10621	MB
ENSG00000129219.9	PLD2	3.39861	3.27261	MB		ENSG00000101680.9	LAMA1	0.450643	0.611752	MB
ENSG00000129195.11	PIMREG	2.53006	2.43368	MB		ENSG00000104341.12	LAPTM4B	4.7722	5.38737	MB
ENSG00000127663.10	KDM4B	3.9146	3.65959	MB		ENSG00000176619.6	LMNB2	5.88312	6.34442	MB
ENSG00000127603.19	MACF1	7.81167	7.6668	MB		ENSG00000101577.5	LPIN2	2.61604	2.68382	MB
ENSG00000125912.6	NCLN	4.84109	4.69942	MB		ENSG00000129951.14	PLPPR3	0.384311	0.433949	MB
ENSG00000125910.4	S1PR4	0.0231683	0.0245993	MB		ENSG00000197147.8	LRRC8B	1.51909	1.42584	MB
ENSG00000125901.5	MRPS26	4.33029	4.1549	MB		ENSG00000100030.10	MAPK1	5.73168	5.84492	MB
ENSG00000125875.9	TBC1D20	3.82592	3.60718	MB		ENSG00000175221.10	MED16	4.02087	4.71788	MB
ENSG00000125818.13	PSMF1	7.18941	7.2322	MB		ENSG00000117899.6	MESD	4.32216	3.8471	MB
ENSG00000125772.8	GPCPD1	2.32034	2.55296	MB		ENSG00000181038.9	METTL23	4.34851	4.92026	MB
ENSG00000125734.9	GPR108	5.28652	5.13655	MB		ENSG00000243156.3	MICAL3	2.91281	3.05277	MB
ENSG00000125733.13	TRIP10	5.42157	5.80403	MB		ENSG00000105556.6	MIER2	2.74891	3.27286	MB
ENSG00000125651.9	GTF2F1	5.67526	5.60707	MB		ENSG00000130382.7	MLLT1	4.12156	4.21625	MB
ENSG00000117899.6	MESD	4.3414	4.46537	MB		ENSG00000172081.9	MOB3A	3.71926	4.12564	MB
ENSG00000116809.7	ZBTB17	4.33134	4.23674	MB		ENSG00000125901.5	MRPS26	4.31421	5.28274	MB
ENSG00000116032.5	GRIN3B	0.122801	0.0953001	MB		ENSG00000134265.8	NAPG	3.3963	3.1029	MB
ENSG00000116017.6	ARID3A	2.143	2.11127	MB		ENSG00000141562.13	NARF	5.13288	5.73448	MB
ENSG00000115020.12	PIKFYVE	2.77634	3.04498	MB		ENSG00000125912.6	NCLN	4.83052	5.58745	MB
ENSG00000113578.13	FGF1	4.67368	3.35227	MB		ENSG00000080986.8	NDC80	3.76394	4.10977	MB
ENSG00000111961.12	SASH1	2.42872	2.97001	MB		ENSG00000131495.4	NDUFA2	5.49171	6.40129	MB
ENSG00000110048.7	OSBP	3.8815	4.15563	MB		ENSG00000173598.9	NUDT4	2.3661	2.33693	MB
ENSG00000108556.7	CHRNE	0.319542	0.490885	MB		ENSG00000105261.5	OVOL3	0.0875378	0.0276444	MB
ENSG00000108469.10	RECQL5	3.04237	2.93923	MB		ENSG00000155463.8	OXA1L	5.7412	6.27367	MB
ENSG00000106244.8	PDAP1	6.98846	7.01376	MB		ENSG00000007168.8	PAFAH1B1	6.34008	5.76302	MB
ENSG00000105556.6	MIER2	2.76026	2.63779	MB		ENSG00000182752.8	PAPPA	0.838455	1.37751	MB
ENSG00000105426.10	PTPRS	3.81972	4.07076	MB		ENSG00000242419.1	PCDHGC4	0.0195422	0.143899	MB
ENSG00000105355.4	PLIN3	8.11189	7.55289	MB		ENSG00000106244.8	PDAP1	6.97001	7.43334	MB
ENSG00000105325.9	FZR1	3.93491	3.9006	MB		ENSG00000215193.8	PEX26	3.05423	3.7061	MB
ENSG00000105261.5	OVOL3	0.0886156	0.035064	MB		ENSG00000105229.2	PIAS4	3.56596	4.17454	MB
ENSG00000105229.2	PIAS4	3.57905	3.54712	MB		ENSG00000115020.12	PIKFYVE	2.76019	1.85569	MB
ENSG00000104980.3	TIMM44	5.07348	5.03865	MB		ENSG00000186111.4	PIP5K1C	3.28976	3.50807	MB
ENSG00000104897.5	SF3A2	5.63729	5.40112	MB		ENSG00000129219.9	PLD2	3.3811	3.56324	MB
ENSG00000104885.13	DOT1L	3.31542	3.59218	MB		ENSG00000099817.7	POLR2E	6.64125	7.41944	MB
ENSG00000104356.6	POP1	2.53567	2.48822	MB		ENSG00000104356.6	POP1	2.51983	2.91987	MB
ENSG00000104341.12	LAPTM4B	4.78721	4.75375	MB		ENSG00000100034.9	PPM1F	4.85016	6.10849	MB
ENSG00000103876.7	FAH	3.72491	4.20043	MB		ENSG00000214140.6	PRCD	0.854185	1.57864	MB
ENSG00000103647.8	CORO2B	2.33585	2.74574	MB		ENSG00000085377.9	PREP	4.36168	4.81875	MB
ENSG00000101849.11	TBL1X	3.02559	3.01846	MB		ENSG00000161542.12	PRPSAP1	4.16965	4.79614	MB
ENSG00000101680.9	LAMA1	0.455272	1.55919	MB		ENSG00000125818.13	PSMF1	7.16895	7.08634	MB
ENSG00000101577.5	LPIN2	2.62856	2.92386	MB		ENSG00000132670.16	PTPRA	5.22075	4.21024	MB
ENSG00000101557.10	USP14	5.1126	5.2916	MB		ENSG00000080371.4	RAB21	5.04664	4.20931	MB
ENSG00000101266.12	CSNK2A1	4.92008	4.93605	MB		ENSG00000039560.9	RAI14	6.02817	5.50504	MB
ENSG00000101255.6	TRIB3	3.50527	4.13097	MB		ENSG00000031823.10	RANBP3	5.7314	5.99982	MB
ENSG00000101236.12	RNF24	3.12329	3.16677	MB		ENSG00000108469.10	RECQL5	3.02709	3.41704	MB
ENSG00000100888.8	CHD8	5.14769	4.91197	MB		ENSG00000139890.5	REM2	0.164264	0.140072	MB
ENSG00000100034.9	PPM1F	4.86452	5.07374	MB		ENSG00000079313.7	REXO1	4.64383	4.96424	MB
ENSG00000100030.10	MAPK1	5.74563	5.90875	MB		ENSG00000087903.8	RFX2	1.90244	1.79368	MB
ENSG00000099991.12	CABIN1	3.81937	3.78473	MB		ENSG00000129667.8	RHBDF2	2.05624	2.60543	MB
ENSG00000099958.10	DERL3	2.63243	3.96608	MB		ENSG00000070423.13	RNF126	5.07145	5.99913	MB
ENSG00000099942.8	CRKL	3.95412	3.9015	MB		ENSG00000101236.12	RNF24	3.11268	3.83837	MB
ENSG00000099904.11	ZDHHC8	4.12486	3.94186	MB		ENSG00000125910.4	S1PR4	0.0228199	0.07168	MB
ENSG00000099817.7	POLR2E	6.65715	6.54953	MB		ENSG00000160633.8	SAFB	5.45726	5.83288	MB
ENSG00000091592.11	NLRP1	3.83174	3.55093	MB		ENSG00000064932.11	SBNO2	4.3799	4.26325	MB
ENSG00000089195.10	TRMT6	3.8305	4.96749	MB		ENSG00000197555.5	SIPA1L1	4.10311	3.64904	MB
ENSG00000088833.13	NSFL1C	5.51274	5.67148	MB		ENSG00000133460.15	SLC2A11	3.03332	3.06189	MB
ENSG00000088826.13	SMOX	4.85632	5.77152	MB		ENSG00000070366.9	SMG6	4.6641	4.8738	MB
ENSG00000087903.8	RFX2	1.91559	1.852	MB		ENSG00000088826.13	SMOX	4.83785	6.23402	MB
ENSG00000085377.9	PREP	4.37709	4.35724	MB		ENSG00000198742.5	SMURF1	2.34749	2.53366	MB
ENSG00000081791.4	DELE1	4.85259	4.75805	MB		ENSG00000186532.7	SMYD4	2.5231	2.33238	MB
ENSG00000080986.8	NDC80	3.78701	3.8812	MB		ENSG00000125875.9	TBC1D20	3.81103	3.76242	MB
ENSG00000080371.4	RAB21	5.06459	5.22022	MB		ENSG00000141556.16	TBCD	4.6683	5.75046	MB
ENSG00000079313.7	REXO1	4.6619	4.72372	MB		ENSG00000101849.11	TBL1X	3.00855	3.11882	MB
ENSG00000071626.12	DAZAP1	6.80166	7.05717	MB		ENSG00000104980.3	TIMM44	5.05572	5.62397	MB
ENSG00000070423.13	RNF126	5.0863	5.02807	MB		ENSG00000138594.8	TMOD3	4.56595	3.58664	MB
ENSG00000070366.9	SMG6	4.68117	4.30292	MB		ENSG00000101255.6	TRIB3	3.48733	3.02059	MB
ENSG00000069956.7	MAPK6	4.69298	4.72201	MB		ENSG00000125733.13	TRIP10	5.40227	5.06757	MB
ENSG00000066044.9	ELAVL1	4.80492	4.79037	MB		ENSG00000166925.4	TSC22D4	3.52302	4.07774	MB
ENSG00000065526.6	SPEN	3.65531	3.26577	MB		ENSG00000184470.15	TXNRD2	4.36718	4.91074	MB
ENSG00000065000.11	AP3D1	5.10129	5.23859	MB		ENSG00000185651.10	UBE2L3	5.81202	5.31214	MB
ENSG00000064932.11	SBNO2	4.39632	4.39564	MB		ENSG00000130939.14	UBE4B	3.93819	3.74317	MB
ENSG00000050130.13	JKAMP	5.27011	5.61777	MB		ENSG00000101557.10	USP14	5.09745	5.14824	MB
ENSG00000040531.10	CTNS	2.63733	2.67166	MB		ENSG00000141252.15	VPS53	4.52131	5.10274	MB
ENSG00000039560.9	RAI14	6.04095	6.51525	MB		ENSG00000116809.7	ZBTB17	4.31217	4.45539	MB
ENSG00000037637.6	FBXO42	3.30005	3.31293	MB		ENSG00000099904.11	ZDHHC8	4.11398	4.57369	MB
ENSG00000031823.10	RANBP3	5.74894	5.87529	MB		ENSG00000172667.6	ZMAT3	4.38465	3.84899	MB
ENSG00000017797.7	RALBP1	4.32468	4.50006	MB		ENSG00000166526.12	ZNF3	3.21913	3.43811	MB
ENSG00000015475.14	BID	4.43687	4.54784	MB		ENSG00000186300.7	ZNF555	2.30275	2.40831	MB
ENSG00000011132.7	APBA3	3.10989	2.74653	MB		ENSG00000140548.5	ZNF710	1.36602	1.54924	MB
ENSG00000007168.8	PAFAH1B1	6.3586	6.48026	MB		ENSG00000166529.10	ZSCAN21	2.31528	2.63342	MB
ENSG00000243156.3	MICAL3	3.51325	4.10001	MT		ENSG00000163297.12	ANTXR2	6.33583	6.01532	MT
ENSG00000242419.1	PCDHGC4	0.0735877	0.0472667	MT		ENSG00000163110.10	PDLIM5	6.85905	7.29845	MT
ENSG00000221838.5	AP4M1	3.55514	3.35242	MT		ENSG00000156110.9	ADK	4.82146	4.88259	MT
ENSG00000215193.8	PEX26	3.28925	3.0574	MT		ENSG00000221838.5	AP4M1	3.47641	4.44447	MT
ENSG00000214140.6	PRCD	0.796149	0.568175	MT		ENSG00000116017.6	ARID3A	1.54091	2.13507	MT
ENSG00000206418.3	RAB12	5.45052	4.98616	MT		ENSG00000172379.14	ARNT2	3.56645	3.1998	MT
ENSG00000198742.5	SMURF1	2.70103	2.60854	MT		ENSG00000186716.15	BCR	3.63998	4.23586	MT
ENSG00000197147.8	LRRC8B	2.38422	2.13239	MT		ENSG00000015475.14	BID	5.29389	6.05349	MT
ENSG00000196569.7	LAMA2	6.57643	6.27979	MT		ENSG00000176155.14	CCDC57	3.6667	3.08991	MT
ENSG00000188186.6	LAMTOR4	6.31782	6.04864	MT		ENSG00000108556.7	CHRNE	0.253499	0.231244	MT
ENSG00000186716.15	BCR	3.71243	4.37658	MT		ENSG00000099942.8	CRKL	3.9675	4.27685	MT
ENSG00000186532.7	SMYD4	2.54275	2.24173	MT		ENSG00000141551.10	CSNK1D	5.69032	5.90407	MT
ENSG00000186111.4	PIP5K1C	3.41051	3.36622	MT		ENSG00000040531.10	CTNS	3.07837	3.21968	MT
ENSG00000185760.11	KCNQ5	1.65172	1.40122	MT		ENSG00000071626.12	DAZAP1	6.27924	6.31909	MT
ENSG00000184178.11	SCFD2	3.36234	3.47438	MT		ENSG00000136986.5	DERL1	4.91584	5.60534	MT
ENSG00000181038.9	METTL23	4.32277	3.86375	MT		ENSG00000099958.10	DERL3	2.18601	2.65331	MT
ENSG00000179409.6	GEMIN4	2.49946	2.83674	MT		ENSG00000169718.13	DUS1L	5.46975	6.30813	MT
ENSG00000176619.6	LMNB2	4.26697	4.36497	MT		ENSG00000066044.9	ELAVL1	4.73819	5.21784	MT
ENSG00000176155.14	CCDC57	3.74533	3.56338	MT		ENSG00000132199.14	ENOSF1	3.40111	3.32184	MT
ENSG00000173598.9	NUDT4	3.38487	2.78413	MT		ENSG00000103876.7	FAH	3.44605	4.07074	MT
ENSG00000172667.6	ZMAT3	4.47177	4.62758	MT		ENSG00000167695.10	FAM57A	2.54176	3.11963	MT
ENSG00000172379.14	ARNT2	3.6384	4.17381	MT		ENSG00000129195.11	PIMREG	0.831268	1.07299	MT
ENSG00000172081.9	MOB3A	3.35927	3.44673	MT		ENSG00000162458.8	FBLIM1	5.15979	5.71947	MT
ENSG00000171861.6	MRM3	3.49532	3.3814	MT		ENSG00000156804.3	FBXO32	6.30077	6.6369	MT
ENSG00000169718.13	DUS1L	5.55728	5.0806	MT		ENSG00000137478.10	FCHSD2	4.26208	4.1854	MT
ENSG00000169635.5	HIC2	0.527493	0.660583	MT		ENSG00000166225.4	FRS2	2.84392	2.83263	MT
ENSG00000168461.8	RAB31	4.85662	4.97684	MT		ENSG00000105325.9	FZR1	3.79526	4.68553	MT
ENSG00000167716.14	WDR81	3.69117	3.26177	MT		ENSG00000179409.6	GEMIN4	2.42815	2.97617	MT
ENSG00000167695.10	FAM57A	2.61303	2.56855	MT		ENSG00000125772.8	GPCPD1	2.26811	2.06534	MT
ENSG00000167476.6	JSRP1	6.75434	5.76183	MT		ENSG00000125734.9	GPR108	5.13898	5.52972	MT
ENSG00000166925.4	TSC22D4	3.18862	3.04726	MT		ENSG00000116032.5	GRIN3B	0.0749772	0.0649325	MT
ENSG00000166529.10	ZSCAN21	2.61046	2.64533	MT		ENSG00000132463.9	GRSF1	6.48389	6.46372	MT
ENSG00000166225.4	FRS2	2.91744	3.17546	MT		ENSG00000169635.5	HIC2	0.501462	0.66365	MT
ENSG00000162458.8	FBLIM1	5.24021	5.42115	MT		ENSG00000167476.6	JSRP1	6.66676	7.65003	MT
ENSG00000161542.12	PRPSAP1	4.09388	4.43536	MT		ENSG00000185760.11	KCNQ5	1.59545	1.12982	MT
ENSG00000161526.10	SAP30BP	6.26464	6.15045	MT		ENSG00000081791.4	DELE1	4.778	5.00295	MT
ENSG00000156804.3	FBXO32	6.38372	5.53854	MT		ENSG00000129250.7	KIF1C	6.96177	7.53811	MT
ENSG00000156110.9	ADK	4.90613	4.52049	MT		ENSG00000101680.9	LAMA1	0.404005	0.644096	MT
ENSG00000155463.8	OXA1L	6.18739	5.86194	MT		ENSG00000196569.7	LAMA2	6.49246	5.73033	MT
ENSG00000154845.11	PPP4R1	5.45234	5.53335	MT		ENSG00000188186.6	LAMTOR4	6.23095	7.1281	MT
ENSG00000153339.9	TRAPPC8	3.93868	4.34661	MT		ENSG00000104341.12	LAPTM4B	5.13501	6.02683	MT
ENSG00000152784.11	PRDM8	3.05841	3.79381	MT		ENSG00000176619.6	LMNB2	4.18556	4.20341	MT
ENSG00000147649.5	MTDH	6.44372	6.64087	MT		ENSG00000129951.14	PLPPR3	0.223985	0.145807	MT
ENSG00000141580.11	WDR45B	5.27302	5.88271	MT		ENSG00000197147.8	LRRC8B	2.31391	2.3344	MT
ENSG00000141562.13	NARF	4.88858	4.96576	MT		ENSG00000100030.10	MAPK1	6.18127	6.52354	MT
ENSG00000141556.16	TBCD	4.59824	4.27374	MT		ENSG00000117899.6	MESD	4.2213	3.72409	MT
ENSG00000141551.10	CSNK1D	5.77524	5.79452	MT		ENSG00000181038.9	METTL23	4.23883	4.4109	MT
ENSG00000141252.15	VPS53	4.48502	4.47612	MT		ENSG00000243156.3	MICAL3	3.43805	3.3683	MT
ENSG00000140548.5	ZNF710	1.376	1.51475	MT		ENSG00000172081.9	MOB3A	3.28179	3.75335	MT
ENSG00000139890.5	REM2	0.162155	0.176929	MT		ENSG00000125901.5	MRPS26	4.43659	5.40998	MT
ENSG00000138594.8	TMOD3	3.87045	4.14239	MT		ENSG00000147649.5	MTDH	6.36192	5.39102	MT
ENSG00000137478.10	FCHSD2	4.34117	4.39322	MT		ENSG00000134265.8	NAPG	3.69611	3.80369	MT
ENSG00000136986.5	DERL1	4.99786	5.08082	MT		ENSG00000141562.13	NARF	4.80386	5.81746	MT
ENSG00000134265.8	NAPG	3.77526	3.64587	MT		ENSG00000125912.6	NCLN	4.64715	5.18786	MT
ENSG00000133460.15	SLC2A11	4.2412	4.04574	MT		ENSG00000080986.8	NDC80	0.753354	0.886189	MT
ENSG00000132670.16	PTPRA	5.25986	5.74802	MT		ENSG00000091592.11	NLRP1	3.90384	4.23007	MT
ENSG00000132463.9	GRSF1	6.56996	6.42	MT		ENSG00000088833.13	NSFL1C	5.85678	6.18299	MT
ENSG00000132199.14	ENOSF1	3.47884	3.31668	MT		ENSG00000173598.9	NUDT4	3.3028	3.63669	MT
ENSG00000129951.14	PLPPR3	0.235469	0.205839	MT		ENSG00000110048.7	OSBP	4.28422	4.44969	MT
ENSG00000129667.8	RHBDF2	1.85546	1.89566	MT		ENSG00000105261.5	OVOL3	0.0265373	0.0557862	MT
ENSG00000129657.10	SEC14L1	6.08718	6.26653	MT		ENSG00000155463.8	OXA1L	6.09987	6.6659	MT
ENSG00000129250.7	KIF1C	7.04751	6.70685	MT		ENSG00000242419.1	PCDHGC4	0.069098	0.093651	MT
ENSG00000129195.11	PIMREG	0.871706	0.8715	MT		ENSG00000106244.8	PDAP1	6.57684	6.97495	MT
ENSG00000125912.6	NCLN	4.72891	4.72845	MT		ENSG00000215193.8	PEX26	3.21089	3.74894	MT
ENSG00000125901.5	MRPS26	4.52347	4.05092	MT		ENSG00000105229.2	PIAS4	3.76402	4.72421	MT
ENSG00000125875.9	TBC1D20	4.05402	3.91899	MT		ENSG00000115020.12	PIKFYVE	3.0679	2.14817	MT
ENSG00000125772.8	GPCPD1	2.33692	2.52871	MT		ENSG00000186111.4	PIP5K1C	3.33551	3.48884	MT
ENSG00000125734.9	GPR108	5.22104	5.21927	MT		ENSG00000099817.7	POLR2E	6.58119	7.18979	MT
ENSG00000117899.6	MESD	4.30002	4.53346	MT		ENSG00000100034.9	PPM1F	4.78919	4.91132	MT
ENSG00000116032.5	GRIN3B	0.0791409	0.12137	MT		ENSG00000154845.11	PPP4R1	5.37023	4.7793	MT
ENSG00000116017.6	ARID3A	1.5975	1.97131	MT		ENSG00000214140.6	PRCD	0.756983	0.850382	MT
ENSG00000115020.12	PIKFYVE	3.14121	3.22949	MT		ENSG00000152784.11	PRDM8	2.98821	2.24619	MT
ENSG00000110048.7	OSBP	4.36633	4.5938	MT		ENSG00000161542.12	PRPSAP1	4.01244	4.78421	MT
ENSG00000108556.7	CHRNE	0.267349	0.465486	MT		ENSG00000132670.16	PTPRA	5.18021	3.70922	MT
ENSG00000108469.10	RECQL5	2.86785	2.90612	MT		ENSG00000206418.3	RAB12	5.36663	5.10107	MT
ENSG00000106244.8	PDAP1	6.66292	6.52333	MT		ENSG00000168461.8	RAB31	4.77635	4.2455	MT
ENSG00000105325.9	FZR1	3.87552	4.04836	MT		ENSG00000108469.10	RECQL5	2.79274	3.03631	MT
ENSG00000105261.5	OVOL3	0.0282224	0.0937979	MT		ENSG00000139890.5	REM2	0.153082	0.219573	MT
ENSG00000105229.2	PIAS4	3.84486	4.32238	MT		ENSG00000079313.7	REXO1	4.38377	4.50965	MT
ENSG00000104341.12	LAPTM4B	5.22083	5.37644	MT		ENSG00000129667.8	RHBDF2	1.7968	1.47961	MT
ENSG00000103876.7	FAH	3.5243	3.63194	MT		ENSG00000101236.12	RNF24	2.95848	3.28319	MT
ENSG00000101849.11	TBL1X	2.54178	2.72157	MT		ENSG00000171861.6	MRM3	3.41334	4.47388	MT
ENSG00000101680.9	LAMA1	0.423644	1.46308	MT		ENSG00000018189.8	RUFY3	4.81152	4.77636	MT
ENSG00000101557.10	USP14	5.54838	5.47451	MT		ENSG00000161526.10	SAP30BP	6.18081	6.33854	MT
ENSG00000101236.12	RNF24	3.03107	3.27087	MT		ENSG00000184178.11	SCFD2	3.28523	3.60108	MT
ENSG00000100034.9	PPM1F	4.87088	5.1198	MT		ENSG00000129657.10	SEC14L1	6.00529	5.8312	MT
ENSG00000100030.10	MAPK1	6.26583	6.28827	MT		ENSG00000133460.15	SLC2A11	4.16294	3.99963	MT
ENSG00000099958.10	DERL3	2.25538	1.44903	MT		ENSG00000088826.13	SMOX	3.59677	4.02496	MT
ENSG00000099942.8	CRKL	4.0488	4.0376	MT		ENSG00000198742.5	SMURF1	2.62981	2.60823	MT
ENSG00000099904.11	ZDHHC8	4.31033	3.93374	MT		ENSG00000186532.7	SMYD4	2.47037	2.97491	MT
ENSG00000099817.7	POLR2E	6.66725	6.56568	MT		ENSG00000125875.9	TBC1D20	3.97235	4.09417	MT
ENSG00000091592.11	NLRP1	3.98279	3.51886	MT		ENSG00000141556.16	TBCD	4.51591	4.94941	MT
ENSG00000089195.10	TRMT6	3.94887	3.91008	MT		ENSG00000101849.11	TBL1X	2.4722	2.77561	MT
ENSG00000088833.13	NSFL1C	5.94062	5.87504	MT		ENSG00000138594.8	TMOD3	3.79379	2.84713	MT
ENSG00000088826.13	SMOX	3.6762	3.76972	MT		ENSG00000153339.9	TRAPPC8	3.8593	3.76144	MT
ENSG00000081791.4	DELE1	4.86233	4.59744	MT		ENSG00000089195.10	TRMT6	3.87152	3.13873	MT
ENSG00000080986.8	NDC80	0.789484	0.844181	MT		ENSG00000166925.4	TSC22D4	3.11076	3.72783	MT
ENSG00000079313.7	REXO1	4.46389	4.30303	MT		ENSG00000101557.10	USP14	5.46437	5.75255	MT
ENSG00000071626.12	DAZAP1	6.36331	6.30651	MT		ENSG00000141252.15	VPS53	4.40271	4.68638	MT
ENSG00000066044.9	ELAVL1	4.82123	4.76905	MT		ENSG00000141580.11	WDR45B	5.19055	5.32068	MT
ENSG00000040531.10	CTNS	3.15332	3.09209	MT		ENSG00000167716.14	WDR81	3.61189	3.76818	MT
ENSG00000018189.8	RUFY3	4.89346	5.03293	MT		ENSG00000099904.11	ZDHHC8	4.2283	4.38719	MT
ENSG00000015475.14	BID	5.38257	4.77062	MT		ENSG00000172667.6	ZMAT3	4.39282	3.91864	MT
ENSG00000163297.12	ANTXR2	6.41788	6.61134	MT		ENSG00000140548.5	ZNF710	1.32497	1.55583	MT
ENSG00000163110.10	PDLIM5	6.94444	6.5201	MT		ENSG00000166529.10	ZSCAN21	2.53747	3.08647	MT
ENSG00000241685.4	ARPC1A	5.61127	5.67542	MT		ENSG00000148848.10	ADAM12	3.28636	2.77474	MT
ENSG00000198053.7	SIRPA	3.04908	3.43934	MT		ENSG00000185722.12	ANKFY1	3.1307	2.87123	MT
ENSG00000197766.3	CFD	2.81075	4.53096	MT		ENSG00000065000.11	AP3D1	5.19713	5.32876	MT
ENSG00000197555.5	SIPA1L1	4.00163	3.96892	MT		ENSG00000011132.7	APBA3	3.24513	4.09999	MT
ENSG00000186635.10	ARAP1	4.65472	5.04195	MT		ENSG00000186635.10	ARAP1	4.57131	4.92258	MT
ENSG00000186300.7	ZNF555	3.05636	2.6281	MT		ENSG00000146376.6	ARHGAP18	3.34126	2.4715	MT
ENSG00000185722.12	ANKFY1	3.20659	3.16382	MT		ENSG00000241685.4	ARPC1A	5.52727	5.97398	MT
ENSG00000185651.10	UBE2L3	5.60439	5.62169	MT		ENSG00000168010.6	ATG16L2	2.26817	2.25458	MT
ENSG00000184470.15	TXNRD2	4.3115	3.848	MT		ENSG00000165629.15	ATP5F1C	7.89645	8.13476	MT
ENSG00000182752.8	PAPPA	2.0951	3.77028	MT		ENSG00000172270.14	BSG	7.67656	8.15532	MT
ENSG00000182511.7	FES	0.790566	1.77206	MT		ENSG00000099991.12	CABIN1	3.44606	3.23467	MT
ENSG00000181396.8	OGFOD3	3.91822	3.6839	MT		ENSG00000197766.3	CFD	2.73547	2.48753	MT
ENSG00000180611.6	MB21D2	1.79631	1.30755	MT		ENSG00000100888.8	CHD8	4.64194	4.28793	MT
ENSG00000175221.10	MED16	4.18572	3.85108	MT		ENSG00000103647.8	CORO2B	2.1064	1.64824	MT
ENSG00000172270.14	BSG	7.76105	8.02773	MT		ENSG00000140577.11	CRTC3	4.39073	3.19328	MT
ENSG00000169750.4	RAC3	1.36238	1.21724	MT		ENSG00000101266.12	CSNK2A1	4.78911	4.5571	MT
ENSG00000168010.6	ATG16L2	2.33666	2.93993	MT		ENSG00000162290.12	DCP1A	2.72152	2.26644	MT
ENSG00000166526.12	ZNF3	3.4655	3.34474	MT		ENSG00000131504.11	DIAPH1	4.57109	5.0486	MT
ENSG00000165629.15	ATP5F1C	7.98424	7.80631	MT		ENSG00000104885.13	DOT1L	3.47664	3.75437	MT
ENSG00000162290.12	DCP1A	2.79305	3.10265	MT		ENSG00000037637.6	FBXO42	2.78446	3.52056	MT
ENSG00000160633.8	SAFB	5.39633	5.60109	MT		ENSG00000182511.7	FES	0.756115	0.956414	MT
ENSG00000148848.10	ADAM12	3.36016	4.23987	MT		ENSG00000113578.13	FGF1	2.73867	2.33284	MT
ENSG00000146376.6	ARHGAP18	3.41592	3.36596	MT		ENSG00000141568.15	FOXK2	4.58953	4.93029	MT
ENSG00000141568.15	FOXK2	4.67292	4.74654	MT		ENSG00000140564.6	FURIN	4.6162	4.92097	MT
ENSG00000140577.11	CRTC3	4.46912	4.47661	MT		ENSG00000125651.9	GTF2F1	5.43889	6.09252	MT
ENSG00000140575.8	IQGAP1	6.34294	6.4629	MT		ENSG00000138413.9	IDH1	4.86138	4.97819	MT
ENSG00000140564.6	FURIN	4.69659	4.77092	MT		ENSG00000140575.8	IQGAP1	6.26234	4.62542	MT
ENSG00000138413.9	IDH1	4.9436	4.87131	MT		ENSG00000050130.13	JKAMP	5.59042	5.21605	MT
ENSG00000137497.13	NUMA1	5.15575	4.95941	MT		ENSG00000127663.10	KDM4B	3.96057	4.27702	MT
ENSG00000134313.10	KIDINS220	4.45881	4.38215	MT		ENSG00000134313.10	KIDINS220	4.37916	3.71091	MT
ENSG00000133104.8	SPART	8.02684	8.22653	MT		ENSG00000101577.5	LPIN2	2.62359	2.55248	MT
ENSG00000132388.8	UBE2G1	5.14364	5.16372	MT		ENSG00000127603.19	MACF1	7.92035	7.06077	MT
ENSG00000131504.11	DIAPH1	4.65551	4.27715	MT		ENSG00000069956.7	MAPK6	4.98521	4.48421	MT
ENSG00000131495.4	NDUFA2	5.92571	5.24195	MT		ENSG00000180611.6	MB21D2	1.73429	2.12765	MT
ENSG00000130939.14	UBE4B	4.01103	4.18717	MT		ENSG00000175221.10	MED16	4.10255	4.89435	MT
ENSG00000130382.7	MLLT1	3.77891	3.7674	MT		ENSG00000105556.6	MIER2	2.82819	3.34448	MT
ENSG00000130254.7	SAFB2	4.93908	5.20357	MT		ENSG00000130382.7	MLLT1	3.69805	3.90563	MT
ENSG00000129219.9	PLD2	2.54545	2.94918	MT		ENSG00000131495.4	NDUFA2	5.83758	6.68139	MT
ENSG00000127663.10	KDM4B	4.04118	3.90307	MT		ENSG00000137497.13	NUMA1	5.07203	5.26491	MT
ENSG00000127603.19	MACF1	8.0025	7.7439	MT		ENSG00000181396.8	OGFOD3	3.83762	4.08876	MT
ENSG00000125818.13	PSMF1	7.07469	7.22287	MT		ENSG00000007168.8	PAFAH1B1	6.45625	6.5995	MT
ENSG00000125733.13	TRIP10	5.06324	5.63332	MT		ENSG00000182752.8	PAPPA	2.03499	1.70214	MT
ENSG00000125651.9	GTF2F1	5.52277	5.97258	MT		ENSG00000129219.9	PLD2	2.47612	2.31236	MT
ENSG00000116809.7	ZBTB17	4.34951	4.35294	MT		ENSG00000105355.4	PLIN3	8.09429	8.82909	MT
ENSG00000113578.13	FGF1	2.80638	3.06069	MT		ENSG00000104356.6	POP1	1.54338	1.71091	MT
ENSG00000111961.12	SASH1	2.72561	3.27223	MT		ENSG00000085377.9	PREP	4.13264	4.38229	MT
ENSG00000105556.6	MIER2	2.90221	2.94135	MT		ENSG00000125818.13	PSMF1	6.99108	7.05744	MT
ENSG00000105426.10	PTPRS	4.39131	4.67119	MT		ENSG00000105426.10	PTPRS	4.31371	3.60347	MT
ENSG00000105355.4	PLIN3	8.18002	7.89647	MT		ENSG00000080371.4	RAB21	5.17445	4.69653	MT
ENSG00000104980.3	TIMM44	5.63752	5.17252	MT		ENSG00000169750.4	RAC3	1.30988	2.98054	MT
ENSG00000104897.5	SF3A2	5.28515	5.34882	MT		ENSG00000039560.9	RAI14	6.02268	5.1968	MT
ENSG00000104885.13	DOT1L	3.55638	3.64581	MT		ENSG00000017797.7	RALBP1	4.41947	4.73543	MT
ENSG00000104356.6	POP1	1.60253	2.24746	MT		ENSG00000031823.10	RANBP3	5.6919	5.98681	MT
ENSG00000103647.8	CORO2B	2.17159	2.47823	MT		ENSG00000087903.8	RFX2	1.69479	1.70299	MT
ENSG00000101577.5	LPIN2	2.69422	3.01679	MT		ENSG00000070423.13	RNF126	5.15179	5.84401	MT
ENSG00000101266.12	CSNK2A1	4.87044	4.7809	MT		ENSG00000125910.4	S1PR4	0.0881523	0.0660625	MT
ENSG00000101255.6	TRIB3	3.64264	3.71017	MT		ENSG00000160633.8	SAFB	5.31247	5.28542	MT
ENSG00000100888.8	CHD8	4.72208	5.03258	MT		ENSG00000130254.7	SAFB2	4.85681	4.43025	MT
ENSG00000099991.12	CABIN1	3.52359	3.59172	MT		ENSG00000111961.12	SASH1	2.65458	2.60039	MT
ENSG00000087903.8	RFX2	1.75428	1.89948	MT		ENSG00000064932.11	SBNO2	3.80047	4.10096	MT
ENSG00000085377.9	PREP	4.21517	3.90008	MT		ENSG00000104897.5	SF3A2	5.20245	5.69669	MT
ENSG00000080371.4	RAB21	5.25684	5.1945	MT		ENSG00000197555.5	SIPA1L1	3.92545	3.18675	MT
ENSG00000070423.13	RNF126	5.23621	5.31338	MT		ENSG00000198053.7	SIRPA	2.97521	3.31893	MT
ENSG00000070366.9	SMG6	4.66886	4.76978	MT		ENSG00000070366.9	SMG6	4.58609	4.66035	MT
ENSG00000069956.7	MAPK6	5.06774	4.89529	MT		ENSG00000065526.6	SPEN	3.47285	3.18602	MT
ENSG00000065526.6	SPEN	3.55127	3.40505	MT		ENSG00000133104.8	SPART	7.94548	5.68852	MT
ENSG00000065000.11	AP3D1	5.28043	5.12589	MT		ENSG00000104980.3	TIMM44	5.54989	6.09383	MT
ENSG00000064932.11	SBNO2	3.87923	4.13589	MT		ENSG00000101255.6	TRIB3	3.56787	4.19237	MT
ENSG00000050130.13	JKAMP	5.67333	5.52005	MT		ENSG00000125733.13	TRIP10	4.98017	5.31435	MT
ENSG00000039560.9	RAI14	6.10256	6.04588	MT		ENSG00000184470.15	TXNRD2	4.22885	4.61679	MT
ENSG00000037637.6	FBXO42	2.86053	2.86057	MT		ENSG00000132388.8	UBE2G1	5.05797	5.47665	MT
ENSG00000031823.10	RANBP3	5.7756	5.80075	MT		ENSG00000185651.10	UBE2L3	5.52304	5.22381	MT
ENSG00000017797.7	RALBP1	4.50094	4.38294	MT		ENSG00000130939.14	UBE4B	3.93104	4.20832	MT
ENSG00000011132.7	APBA3	3.32375	3.15491	MT		ENSG00000116809.7	ZBTB17	4.26685	4.56884	MT
ENSG00000007168.8	PAFAH1B1	6.54012	6.72488	MT		ENSG00000166526.12	ZNF3	3.38676	3.68366	MT
ENSG00000125910.4	S1PR4	0.0933807	0.031138	MT		ENSG00000186300.7	ZNF555	2.97804	3.47149	MT
