# Supplementary material for: 4q-D4Z4 chromatin architecture regulates the transcription of muscle atrophic genes in facioscapulohumeral muscular dystrophy
Source: HighWire-hosted journal article supplement (doi:10.1101/gr.233288.117), 2019-05-16
Supplement: Supplemental_Table_S6_JD.xlsx [file Supplemental_Table_S6_JD.xlsx]

## Sheet: legend
Supplemental Table S6. Primers used in this study
Sheet 1	3C primers
Sheet 2	ChIP qPCR primers
Sheet 3	RT qPCR primers
Sheet 4	3D FISH PCR probes

## Sheet: 3C primers
3C primers
Name	Sequence
4	TTGATTGTATCTTTTGGTGCACA
5	TGTGCCATAAGTTTTGTGAAGC
7	TGGGTATAGGGCTAGGCAGA
8	ACTGAAGGTGTGATTTGTTGCA
9	CATGGTGGCCTTATGATTTCCA
11	AAATAGAGCCCTGGTGCCAA
13	GGGAGGAAGGTACAGTGGTT
15	GGACAGAGACAGAAAAGTGCA
16	CTGTCCTAAACGGGGTCACT
17	ACCCCTTTTCCAGCCTAGTT
19	AACACTTTCACACCCACTGC
22	ATGTTGGACTGGGAAGACGT
23	CAACATTCCCATCAATAGGCCA
24	AAAGAGGGAGGTAGGGAGGT
25	CTTCCAGCAACACAGGCAAT
26	AATGACGAGTTGATGGGTGC
30	GGCCCCTCAGTATCAATCCA
32	CAAAGGTGATGCTTGCCAGA
Bait	ATATTGCACCCTGGGGGAAGCT

## Sheet: ChIP qPCR primers
ChIP qPCR primers
Name	Fw Sequence	Rv Sequence
MYT1	TGTCTACCACATTCGCCAGT	GGCCTCAAGTGGTCACATCA
GAPDH	ATCCAAGCGTGTAAGGGTCC	GACTGAGATTGGCCCGATGG
ACTB	AGAACCAGTGAGAAAGGGCG	GCGAGAAGATGACCCAGGTG
HIST1H2BA	TATAGCGAGCGAGGCATCAC	ATGTTTAGCCAGCTCTCCCG
SERPINA1	CTGCCCTTTCAGCTCTGTGA	AATCCTCTGGGCAGTGTGAC
GAS2L1	TAGTGCCTGGCTCCTTCATG	AGCACCAGGTCCTCAGTCTC
RPL10	ACCTCTCCCCGGATGCTG	CTGTGCTCAAGAGTCCCTCC
ZSCAN4	ACTACAGGTGCATGCCATCA	TCAGGATTTCGAGACCAGCC
FBXO32 promoter	CACCGCTTCAAGTTTCCACC	CGTGGCTTTGTTTATGGGCT
FBXO32 internal region	CAGTTGGTGCAGGTAGGTCT	AAAGACTGGGAGCAGGGTAC
GAPDH promoter	TCCTCCTGTTTCATCCAAGC	CCTACTTTCTCCCCGCTTTT

## Sheet: RT qPCR primers
RT qPCR primers
Name	Fw Sequence	Rv Sequence
MYOD1	GACGGCATGATGGACTACAG	GGGCGCCTCGTTGTAGTAG
MYOG	TCAACCAGGAGGAGCGTGAC	TGTAGGGTCAGCCGTGAGCA
MYH2	GGACCAACTGAGTGAACTGAAA	TTGCCTCTTGATAACTGAGAC
DUX4-fl	TCCAGGAGATGTAACTCTAATCCA	TCCAGGAGATGTAACTCTAATCCA
ZSCAN4	CCCAGTCAACCAAGGAGCTT	TCAGTCTCTTGCCTTGTGTCTC
KHDC1L	GAGCCAGGACTCCAAGTGTC	CTAACGGAGGTGACCAGGTC
PANK2	GGGATCGACTGGGCTCTTAC	GTTCCACCGATATCCAGTCCA
FBXO32	TTCCTGGATGAGAAGAGCGG	CTCTTCTTGGCTGCAACATCA
DUX4	GCGCAACCTCTCCTAGAAAC	AGCAGAGCCCGGTATTCTTC
RFPL2	CCCACATCAAGGAACTGGAG	TGTTGGCATCCAAGGTCATA
RPL13A	AACCTCCTCCTTTTCCAAGC	GCAGTACCTGTTTAGCCACGA
TRIB3	TGACAACTTAGATACCGAGCGT	CTGGAGCAGTAGGTGGGC
ZNF555	GAGATGTGATGCTGGAGACCT	TGCTGAGAAACTGACCCACTG
LZTS3	CTGCCCCGGATAGAGGAAAC	CAACTTCTGCGACACATCCG
FOXO3	CAGTGTGTTTCCGGTTCTGA	CATTTGGCAATGAGTGGAGA
GAPDH	CCCTTCATTGACCTCAACTACATG	TGGGATTTCCATTGATGACAAGC
BAC	CGATCCGGCGCGCCAATAGT	CGACCGATGCCCTTGAGAGCC
Genomic control region	CAGTTGGTGCAGGTAGGTCT	AAAGACTGGGAGCAGGGTAC

## Sheet: 3D FISH PCR probes
3D FISH PCR probes
Name	Fw Sequence	Rv Sequence
BAC 4q-D4Z4n_1	TACATCCGGCGACAACCATA	CCGCTCATGAGACAATAACCC
BAC 4q-D4Z4n_2	CCGAAAAGTGCCACCTGAC	TCTGGGAAGATCGAGTGCTC
BAC 4q-D4Z4n_3	CGGTTGCCATAAGAGAAGCC	ACTCGTGTTGTCGGTCTGAT
BAC 4q-D4Z4n_4	CCGTGGTCCCAGTCTGATTA	CTTACTGAGGACGCACTGGA
BAC 4q-D4Z4n_5	CCGACCACATACAGGCAAAG	TCTGAAGGGGCTACGTGTTT
BAC 4q-D4Z4n_6	AGCCTGAGAAGAAACCCCAA	CCAGCTGCCTCAAAGTTACC
BAC 4q-D4Z4n_7	TTCACTAAGCCGAAACTGCG	TACGTTGAAGTGGAGCGGAT
BAC 4q-D4Z4n_8	TCGTTCGCTTCTCAGTGGAT	TCCCATATCACCAGCTCACC
BAC 4q-D4Z4n_9	ACGGTGAAAACCTGGCCTAT	CGGCCGCAAATTTATTAGAGC
Ctrl BAC_1	ACAAGCCGCTGAACAAAACA	CTGTGGATTGCTGCTGTGTC
Ctrl BAC_2	CCGTGGTCCCAGTCTGATTA	CTTACTGAGGACGCACTGGA
Ctrl BAC_3	CCGACCACATACAGGCAAAG	TCTGAAGGGGCTACGTGTTT
Ctrl BAC_4	AGCCTGAGAAGAAACCCCAA	CCAGCTGCCTCAAAGTTACC
Ctrl BAC_5	GTTTCCGCCATGACAGATCC	GTCACACCACATACGTTCCG
Ctrl BAC_6	TGAGGCATTTCAGTCAGTTGC	TTCAACCCAGTCAGCTCCTT
4q_1	TGTTTCACATGGTCACGGGT	CCCAGAGTGTGAACCTGTCC
4q_2	AGTCACCTCTTGCACTTGTGT	AAGCACCGTCTGTCCCTTTT
4q_3	GTTTGGATGGCTGTGGATTTGA	GGAGGAGAAAGGGTGACATCC
4q_4	CCTGCTTACCCTGGGCTAAG	TGAGCTGAGATTGCACCACT
4q_5	CCTGTCTGGGTTCCTCTTGG	GATGTGGAGGTCATAGGGCG
4q_6	CAGTACCGCAGCTACAGAGG	AGGCCCTGGAACTAGCTGA
4q_7	CTAACTGCCTGCTTTGGGGA	TCGGTGGCTTACAGGTAGGA
4q_8	TCCACACTCATCGTCACCAC	AAACCTCTGCAACACAACGG
4q_9	ACCCCAACGCAGAACATGTA	TGTGGCTGCTCTGGAAATGT
4q_10	AGGGAAATGGGATGCAAAGGA	ACACACACAGACCACAGCTT
4q_11	GGGCGTCTGACTGTAGTGAG	GGCATGAGGAGGCAGAGTTA
4q_12	GCAAGGCAAGCAAGTGAAGT	TCTTCTAGACACCTCCGCCA
4q_13	ACTCACAAAGCAGGGGATGG	CACGGGGATTGTTTCTGCAC
4q_14	TTGCTCCCTCTCTTGCCTTG	TAAGGGGAGTTGTGGAAGGC
4q_15	CCATAACCCGACCACCTCAG	CAAAGGAAGAGGGAAGGCGT
4q_16	TGACCTCCCCTCCTACAGC	CCAGGCTGAGTTCCGCATAT
4q_17	AGCATTGAGGAAACGGAGCA	ACGACTGACAAAACACACGC
4q_18	CATTGCTGCACGGCTCTG	GGAATCCGTGCATGCATCAG
4q_19	ATCACGCCAGATACACCCG	CATTTCCCCTGTCATGTGCC
4q_20	GAGCCGAGATCATGCCATTG	GACCAGCTTCTGTGACCTCA
4q_21	GTAGGCCAGCAGAAGAGGAG	GACACAACACTAGATGGCGC
4q_22	TGAAAGGCTGAGATGGGAGG	GCCTCAGGATTCCAGTGTGT
4q_23	GCCATTGATCATGTTCCGGG	TGTCAGGGGCACTTCAAGAA
4q_24	TGGTTGAACTGTTGGAAAATGGT	ATGTTGTTCTGGACTTTGGCAAT
4q_25	GTCAGCGAAGGGAGATAGGG	TGTCCTCGGAATGCTACAGG
4q_26	CGGGGCATGTTGAGTAAAGC	GCTCTCCCTGCTGATCATGT
4q_27	GGGGTCTGTCTGTGAAGCTT	GCTCTCTGACTCCTTCCCAG
FBXO32_1	CTCTTGGCTCTTAGGGGCTG	AGGCTGGTCTTGAACTCCTG
FBXO32_2	CACTGGCACCTAAACACACC	ACATATGCGGATTCCCAGGT
FBXO32_3	TGAGAGGTCACAGGGGAAAA	GAGAACTGGGTCTTGGGGAA
FBXO32_4	GTTGAGCTTCTGTGTGGAGG	AAGTGATCCGCCTGTCTCAG
FBXO32_5	CTGCAACCTTCAACTCCCAG	GGAGGAAGACGCTGGTGTAA
FBXO32_6	TGGTACCAGTTCTCCAAGCT	AACCATGCTCCTTCCACTGA
FBXO32_7	TAGGAATTTGGGACCCGGAG	TGTGATTGGCGTCTTTCTACAG
FBXO32_8	AACAGATGAGCAAAGCGAGG	GCCTTCCGAATCTTGCTGTT
FBXO32_9	CATCACTGGGTAGGAGGTGG	CATAGCCCAGGTGCCAAATC
FBXO32_10	AGCAACCCAGTGAGATAGCT	GCCTCATCCTAAATGTGCTGG
FBXO32_11	GCATCACTCTATAGGCCCAGA	AGCCTGCTCTTGATACGAGA
FBXO32_12	TCTTTACATGCTCGGCTCCA	GGAAGTACCCAGCACTCAGA
FBXO32_13	TGCAGGCATGTCAAGATTGG	TGAATGCTTTTGAGCCCCTG
FBXO32_14	GGCACCTGTAATCCCAGCTA	ACTTTGAGGGTACAGGGTGG
FBXO32_15	TTCACCATCTTGACCAGGCT	AGGGACGTGGAATAAAGGCA
FBXO32_16	GGTTGATGGCATCTGGGGAT	ACCTACCCTGACACCATGAG
FBXO32_17	TCTGAACCCAACTCTGCCAT	TCCAGCTCAAAGTTCGAAGC
FBXO32_18	TTAAAAGTAGCAATGCCTGGGT	AGCCACTGTGTTTTGAGGTTT
FBXO32_19	ATTAGCGGCTGACTTTGCAC	CCTGGGTTGTTGTGCTTCTC
FBXO32_20	TTGAGACTTACCCGGACCAC	TTCAGTCCTGGAAGCGCTAA
FBXO32_21	CTACCATATCCCTCCCTGCG	TTGCTCTCTCACCCAGGC
FBXO32_22	AAGGCCCTCAACTAGCAACT	GGCACTACACCCAAAGCATC
FBXO32_23	AGGTCACTGAAGGATGGGC	TGACCTTCCATCGTTTGCTG
FBXO32_24	TGGAGCACTCACTTTCCTCA	ACCCGGAAGCAGGAAGTTTA
FBXO32_25	GGATCATCCCAATTCACGCC	CCCTATACCGGCATCAGGAG
FBXO32_26	TTGGGTGAGCAGCTCTAACA	TCGGTCGGTCTGCTTTGTAT
